# Supplementary material for: Rapid purification and metabolomic profiling of synaptic vesicles from mammalian brain
Source: eLife. 2020 Oct 12;9:e59699. doi: 10.7554/eLife.59699 (PMC7575323; doi:10.7554/eLife.59699)
Supplement: Figure 1—source data 1. [file elife-59699-fig1-data1.xlsx]

## Sheet: Figure 1H source data
Whole cell input
BCA assay for total [protein]
BSA standard curve
[BSA] ug/ul	A550									A550	protein concentration (ug/ul)	total protein (ug)
0	0.089								whole cell input replicate 1	0.209	0.986611	986.611
0.75	0.181								whole cell input replicate 2	0.222	1.0954	1095.4
0.5	0.15								whole cell input replicate 3	0.209	0.986611	986.611
0.25	0.121
0.125	0.108
0.025	0.095
synaptobrevin quantitative western
synaptobrevin loaded (ng)	Immunoblot intensity									Immunoblot intensity	synaptobrevin in lane (ng)	total synaptobrevin in sample (ng)
0	130.206								whole cell input replicate 1	148.784	26.637	22197.5
12.5	135.94								whole cell input replicate 2	164.432	47.7373	39781.1
25	148.747								whole cell input replicate 3	154.704	34.6197	28849.8
HA immunoisolate from SV-Tagged cells
BCA assay for total [protein]
BSA standard curve
[BSA] ug/ul	A550									A550	protein concentration (ug/ul)	total protein (ug)
0	0.133								HA IP replicate 1	0.192	0.0203529	1.42471
0.5	1.029								HA IP replicate 2	0.194	0.0214805	1.50364
0.25	0.612								HA IP replicate 3	0.204	0.0271185	1.89829
0.125	0.409
0.025	0.193
synaptobrevin quantitative western
synaptobrevin loaded (ng)	Immunoblot intensity									Immunoblot intensity	synaptobrevin in lane (ng)	total synaptobrevin in sample (ng)
0	129.396								HA IP replicate 1	150.692	21.39	299.46
17.5	145.535								HA IP replicate 2	166.213	39.1324	547.853
35	170.38								HA IP replicate 3	170.306	43.8112	613.356
70	189.755
	[protein] ug/ul	volume (ul)	total protein (ug)	total synaptobrevin (ug)	total protein % of WC	total sbrev % of WC	enrichment
whole cell input replicate 1	0.986611	1000	986.611	22.2	1	1	1
whole cell input replicate 2	1.0954	1000	1095.4	39.8	1	1	1
whole cell input replicate 3	0.986611	1000	986.611	28.8	1	1	1
average	1.02287	1000	1022.87	30.2667	1	1
stdev	0.0628076	0	62.8076	8.89119	0	0
HA IP replicate 1	0.020353	70	1.42471	0.299	0.144404	1.34685	9.32691
HA IP replicate 2	0.021481	70	1.50367	0.547	0.137272	1.37437	10.0121
HA IP replicate 3	0.027118	70	1.89826	0.613	0.192402	2.12847	11.0626
average	0.022984		1.60888	0.486333	0.158026	1.61656	10.1339
stdev	0.0036243		0.253701	0.165558	0.0299834	0.443539	0.874247
