# Supplementary material for: Rapid purification and metabolomic profiling of synaptic vesicles from mammalian brain
Source: eLife. 2020 Oct 12;9:e59699. doi: 10.7554/eLife.59699 (PMC7575323; doi:10.7554/eLife.59699)
Supplement: Figure 1—source data 2. [file elife-59699-fig1-data2.xlsx]

## Sheet: Raw measurements
66.989
54.949
100.208
56.502
53.285
26.447
54.188
55.824
68.32
84.252
74.106
65.947
45.959
46.632
45.959
58.431
102.361
27.474
61.209
63.649
31.688
102.766
55.326
52.894
53.285
59.137
62.773
70.613
60.125
68.32
57.475
64.083
33.287
62.552
72.976
55.513
58.252
38.316
34.312
44.814
46.854
55.513
54.949
60.009
48.524
42.433
47.441
65.947
65.789
59.662
68.269
55.824
69.476
68.472
55.513
56.318
125.684
42.514
107.348
35.306
69.923
84.743
72.976
55.513
60.009
61.94
53.22
22.638
56.93
37.216
37.216
51.702
63.377
33.287
50.276
50.824
53.22
60.009
56.502
39.823
142.203
53.22
77.038
84.58
28.465
50.824
53.22
62.552
50.824
68.421
54.251
52.697
73.402
51.903
49.443
45.275
40.083
67.092
50.824
64.514
65.842
65.789
60.583
84.375
60.755
66.574
76.723
67.453
37.953
65.842
52.894
61.94
34.613
50.619
66.261
34.613
63.377
49.162
67.092
84.375
129.617
80.036
50.619
31.579
33.287
54.949
57.475
60.755
71.587
51.903
49.931
56.686
76.723
58.133
71.49
67.453
71.101
42.187
52.894
76.361
42.433
58.844
26.447
48.022
81.749
164.805
38.316
23.684
30.689
67.658
43.401
40.255
78.947
42.433
79.123
50.069
110.558
67.658
148.585
42.839
64.029
68.623
36.936
63.158
71.053
60.125
52.894
58.431
49.162
59.137
116.178
51.096
55.824
39.474
42.433
74.106
140.093
69.476
135.136
47.368
24.965
18.608
61.209
76.361
66
52.632
64.728
77.932
48.381
92.256
42.433
58.133
60.067
58.844
141.47
63.595
116.267
62.552
50.551
64.083
79.341
71.587
53.22
55.513
48.381
151.493
138.302
64.514
59.371
67.658
112.051
136.943
51.903
151.127
60.583
60.755
62.386
78.991
52.697
44.737
89.821
35.11
61.378
64.083
113.188
52.434
64.995
54.188
50
66
77.442
67.913
56.502
159.856
35.306
50.276
45.275
49.931
60.755
40.169
24.262
69.476
33.701
66.574
61.435
63.704
41.107
176.08
50.619
58.431
51.096
84.211
29.422
44.968
64.995
44.814
73.307
56.257
148.515
66.626
54.251
68.421
59.137
74.106
55.513
39.474
52.697
57.895
89.047
61.435
63.158
55.513
69.675
72.976
81.281
58.431
60.755
74.106
37.678
27.474
53.674
53.674
53.674
26.447
63.213
93.04
57.715
59.137
63.213
65.789
69.226
60.125
67.092
121.766
60.755
39.561
61.039
39.561
65.789
74.432
134.623
142.203
71.828
37.402
81.239
66.261
56.257
50.824
68.875
52.697
40.938
74.293
64.995
45.959
67.453
56.686
56.257
72.261
54.188
62.107
40.083
55.326
57.955
53.285
60.755
22.638
59.137
72.976
48.309
50.276
49.653
60.583
42.839
29.422
50.824
67.658
64.083
74.106
38.316
27.474
26.447
55.824
51.903
49.931
50.619
58.252
68.472
66.626
40.083
31.797
52.894
65.842
67.092
42.514
62.386
36.654
37.678
40.853
114.011
58.844
132.862
52.894
57.715
54.251
26.316
202.649
42.514
73.731
66
24.826
27.974
44.737
52.632
66.626
64.245
66
70.219
63.649
44.737
52.632
56.257
41.191
126.59
55.326
68.421
60.583
55.326
42.433
44.814
75.769
52.697
38.855
63.377
67.401
55.762
27.474
68.472
57.715
42.187
50.619
65.102
56.257
52.894
58.133
63.649
50.824
58.431
52.894
26.316
73.872
56.257
53.674
56.686
56.686
26.447
37.216
44.737
54.188
56.808
68.472
65.842
57.955
70.857
24.965
42.187
52.894
58.844
240.556
44.968
50.069
54.251
105.296
42.839
71.828
53.674
121.167
65.789
76.497
48.309
55.824
29.422
76.316
65.947
69.076
61.435
50.069
58.133
76.497
48.524
58.844
34.613
51.096
56.808
45.045
103.839
67.247
50.619
66.261
31.688
39.121
52.632
54.949
65.789
53.22
47.441
69.476
42.514
33.287
34.211
50.276
49.162
70.857
44.814
60.583
74.106
42.105
61.435
52.697
50.276
39.121
62.552
52.632
55.824
56.808
31.579
61.039
47.368
57.955
55.513
119.15
37.678
58.844
58.431
50
76.497
42.187
39.474
126.59
52.434
61.435
62.552
45.959
54.251
58.431
64.995
53.674
58.844
77.932
34.211
58.431
42.839
52.697
36.559
38.855
131.579
44.968
68.623
52.894
57.775
42.514
49.931
32.123
43.401
48.524
52.434
48.524
47.66
20.553
156.308
53.22
37.953
58.844
66.261
54.251
55.326
29.773
23.684
57.775
42.187
142.203
61.435
45.959
31.579
63.649
48.524
47.66
36.936
40.853
45.428
61.435
65.842
63.704
45.959
63.595
48.95
43.401
30.005
51.096
57.955
35.11
75.357
69.476
61.94
56.257
66
47.66
51.096
55.513
40.255
55.824
41.191
57.475
58.844
66.989
56.93
221.959
78.947
166.644
65.842
90.742
55.824
75.403
74.85
52.235
37.402
39.121
85.029
56.257
75.952
44.814
48.95
50.619
61.0554	average
26.2096	std

## Sheet: Sheet2
Particle Size (nm)	# of particles	Fraction of particles
10	0	0
20	10	0.0168919
30	37	0.0625
40	80	0.135135
50	131	0.221284
60	158	0.266892
70	97	0.163851
80	31	0.0523649
90	6	0.0101351
100	4	0.00675676
110	6	0.0101351
120	5	0.00844595
130	7	0.0118243
140	8	0.0135135
150	4	0.00675676
160	3	0.00506757
170	1	0.00168919
180	1	0.00168919
190	0	0
200	1	0.00168919
210	0	0
220	1	0.00168919
230	0	0
240	1	0.00168919
250	0	0
total count	592
