# Supplementary material for: Rapid purification and metabolomic profiling of synaptic vesicles from mammalian brain
Source: eLife. 2020 Oct 12;9:e59699. doi: 10.7554/eLife.59699 (PMC7575323; doi:10.7554/eLife.59699)
Supplement: Figure 4—source data 1. [file elife-59699-fig4-data1.xlsx]

## Sheet: absolute dopamine concentration
sample	replicate #	calculated dopamine concentration (uM)
blank	1	not detected
10 nM dopamine standard	1	0.011934
30 nM dopamine standard	1	0.0231013
100 nM dopamine standard	1	0.102272
300 nM dopamine standard	1	0.3004
1 uM dopamine standard	1	1.10157
3 uM dopamine standard	1	2.9663
10 uM dopamine standard	1	9.73178
HA immunoisolate from uninfected brain, mouse IP injected with saline/DMSO vehicle	1	0.000113102
	2	0.000406904
	3	0.000407801
	4	9.13564e-05
	5	6.22024e-05
	6	0.000344424
		0.000174661
HA immunoisolate from infected brain, mouse IP injected with saline/DMSO vehicle	1	0.00796712
	2	0.00366586
	3	0.00486559
HA immunoisolate from infected brain, mouse IP injected with tetrabenazine	1	0.00125681
	2	0.000816457
	3	0.00154704
