# Supplementary material for: Rapid purification and metabolomic profiling of synaptic vesicles from mammalian brain
Source: eLife. 2020 Oct 12;9:e59699. doi: 10.7554/eLife.59699 (PMC7575323; doi:10.7554/eLife.59699)
Supplement: Supplementary file 1. [file elife-59699-supp1.xlsx]

## Sheet: proteomics data processing
All hits are included in the "All peptides detected" tab.
All hits were filtered to include only peptides that were detected in SV-Tag
infected samples. Peptides that were detected only in uninfected samples
were removed. The peptides remaining post processing are in the "Filtered Peptides" tab.
Fold change was calculated by dividing the averaged sum intensity of
peptides in SV-Tag samples over the averaged sum intensity of peptides in uninfected samples.
The p value was calculated by a paired ttest with a two-tailed distribution
Additional processing was performed for samples in which all three uninfected samples had peptide intensities of 0.
For these peptides, the fold change and pvalue are not a number and would not be plottable
Thus, we assigned the fold change as the top value observed in this dataset (6.7, associated with Vamp2)
and the pvalue as the top value observed (4.717 for Tm9sf2).
For samples in which 2 of the uninfected samples had 0 peptides,
the pvalue was not a number. These were not plotted in the final
volcano plot as we do not have confidence in the peptide abundance in the uninfected samples.

## Sheet: all peptides detected
uninfected sample 1	reference	Gene Symbol	Unique	Total	Sum Intensity	Intensity%		uninfected sample 2	reference	Gene Symbol	Unique	Total	Sum Intensity	Intensity%		uninfected sample 3	reference	Gene Symbol	Unique	Total	Sum Intensity	Intensity%		SV-Tag infected sample 1	reference	Gene Symbol	Unique	Total	Sum Intensity	Intensity%		SV-Tag infected sample 2	reference	Gene Symbol	Unique	Total	Sum Intensity	Intensity%		SV-Tag infected sample 3	reference	Gene Symbol	Unique	Total	Sum Intensity	Intensity%		reference	Gene Symbol
	sp|Q9EQF6|DPYL5_MOUSE	Dpysl5	38	365	1100000000	6.3			sp|Q91ZX7|LRP1_MOUSE	Lrp1	56	93	50000000	0.13			sp|Q91ZX7|LRP1_MOUSE	Lrp1	46	68	23000000	0.0913			sp|Q3TXX4|VGLU1_MOUSE	Slc17a7	11	21	41000000	0.0781			sp|Q3TXX4|VGLU1_MOUSE	Slc17a7	11	23	34000000	0.0779			sp|Q3TXX4|VGLU1_MOUSE	Slc17a7	8	14	10000000	0.0326		sp|Q91ZX7|LRP1_MOUSE	Lrp1
	sp|Q91ZX7|LRP1_MOUSE	Lrp1	37	62	8000000	0.0471			sp|Q9EQF6|DPYL5_MOUSE	Dpysl5	42	242	2400000000	6.01			sp|Q9EQF6|DPYL5_MOUSE	Dpysl5	43	242	1900000000	7.49			sp|Q8BLE7|VGLU2_MOUSE	Slc17a6	8	8	5600000	0.0106			sp|Q8BLE7|VGLU2_MOUSE	Slc17a6	9	13	4600000	0.0107			sp|Q99MR3|S12A9_MOUSE	Slc12a9	6	6	1400000	0.00461		sp|P16546|SPTN1_MOUSE	Sptan1
	sp|P16546|SPTN1_MOUSE	Sptan1	35	51	6800000	0.0404			sp|P56480|ATPB_MOUSE	Atp5b	41	138	600000000	1.5			sp|P56480|ATPB_MOUSE	Atp5b	40	134	390000000	1.55			sp|P97390|VPS45_MOUSE	Vps45	8	8	1300000	0.00248			tr|V9GX34|V9GX34_MOUSE	Csmd2	7	8	1000000	0.00234			sp|Q9DCP2|S38A3_MOUSE	Slc38a3	5	10	3500000	0.0111		sp|P50516|VATA_MOUSE	Atp6v1a
	sp|P13595|NCAM1_MOUSE	Ncam1	34	398	190000000	1.09			sp|P12960|CNTN1_MOUSE	Cntn1	40	117	170000000	0.42			sp|P12960|CNTN1_MOUSE	Cntn1	40	102	82000000	0.32			sp|Q920N7|SYT12_MOUSE	Syt12	6	6	2400000	0.00465			sp|Q99MR3|S12A9_MOUSE	Slc12a9	7	8	2200000	0.00504			sp|Q8BLE7|VGLU2_MOUSE	Slc17a6	5	5	1700000	0.00536		sp|P12960|CNTN1_MOUSE	Cntn1
	sp|P12960|CNTN1_MOUSE	Cntn1	34	140	52000000	0.31			sp|P16546|SPTN1_MOUSE	Sptan1	39	39	8400000	0.0211			sp|O55143|AT2A2_MOUSE	Atp2a2	36	63	45000000	0.18			tr|V9GX34|V9GX34_MOUSE	Csmd2	5	7	1100000	0.002			sp|Q9JIS8|S12A4_MOUSE	Slc12a4	7	7	1100000	0.00246			sp|Q9DBS2|TPRGL_MOUSE	Tprg1l	5	5	5300000	0.0169		sp|Q9EQF6|DPYL5_MOUSE	Dpysl5
	sp|P97427|DPYL1_MOUSE	Crmp1	33	211	890000000	5.28			sp|P13595|NCAM1_MOUSE	Ncam1	37	195	360000000	0.9			sp|P16546|SPTN1_MOUSE	Sptan1	36	38	6000000	0.0237			sp|Q8K386|RAB15_MOUSE	Rab15	5	6	5000000	0.00956			sp|P97390|VPS45_MOUSE	Vps45	7	7	1100000	0.00253			sp|Q9DC11|PXDC2_MOUSE	Plxdc2	4	5	900000	0.00288		sp|O55143|AT2A2_MOUSE	Atp2a2
	sp|P20029|GRP78_MOUSE	Hspa5	32	141	180000000	1.04			sp|Q62188|DPYL3_MOUSE	Dpysl3	35	191	2400000000	5.94			sp|P13595|NCAM1_MOUSE	Ncam1	35	147	100000000	0.41			sp|Q9Z2W9|GRIA3_MOUSE	Gria3	5	5	1500000	0.00284			sp|Q9DBS2|TPRGL_MOUSE	Tprg1l	6	8	6800000	0.0157			tr|V9GX34|V9GX34_MOUSE	Csmd2	4	5	570000	0.00182		sp|Q68FD5|CLH1_MOUSE	Cltc
	sp|Q62351|TFR1_MOUSE	Tfrc	29	67	23000000	0.13			sp|P97427|DPYL1_MOUSE	Crmp1	35	172	2500000000	6.33			sp|Q62188|DPYL3_MOUSE	Dpysl3	34	209	2000000000	8.11			sp|Q9DBS2|TPRGL_MOUSE	Tprg1l	5	5	6700000	0.0127			sp|O70228|ATP9A_MOUSE	Atp9a	6	6	1400000	0.00327			sp|Q3UHN9|NDST1_MOUSE	Ndst1	4	4	460000	0.00146		sp|Q62351|TFR1_MOUSE	Tfrc
	sp|P56480|ATPB_MOUSE	Atp5b	28	141	220000000	1.28			sp|O55143|AT2A2_MOUSE	Atp2a2	35	61	66000000	0.16			sp|P97427|DPYL1_MOUSE	Crmp1	33	169	1700000000	6.66			sp|Q99MR3|S12A9_MOUSE	Slc12a9	5	5	1800000	0.0034			sp|Q8K386|RAB15_MOUSE	Rab15	5	5	2400000	0.00547			sp|P97390|VPS45_MOUSE	Vps45	3	5	420000	0.00135		sp|P13595|NCAM1_MOUSE	Ncam1
	sp|O55143|AT2A2_MOUSE	Atp2a2	28	64	28000000	0.17			sp|P20029|GRP78_MOUSE	Hspa5	32	121	460000000	1.15			sp|P20029|GRP78_MOUSE	Hspa5	33	116	270000000	1.07			sp|Q9DC11|PXDC2_MOUSE	Plxdc2	4	5	1500000	0.00277			sp|Q9Z2W9|GRIA3_MOUSE	Gria3	4	5	1300000	0.00301			sp|Q9DBU0|TM9S1_MOUSE	Tm9sf1	3	4	1100000	0.00351		sp|P56480|ATPB_MOUSE	Atp5b
	sp|Q62188|DPYL3_MOUSE	Dpysl3	27	199	560000000	3.29			sp|Q61548|AP180_MOUSE	Snap91	29	200	1500000000	3.84			sp|Q61548|AP180_MOUSE	Snap91	31	155	520000000	2.08			sp|Q9DCP2|S38A3_MOUSE	Slc38a3	4	5	1200000	0.00235			sp|Q9JKC6|CEND_MOUSE	Cend1	4	5	2100000	0.00494			sp|Q9D8V0|HM13_MOUSE	Hm13	3	4	350000	0.00111		sp|Q91V14|S12A5_MOUSE	Slc12a5
	sp|Q03265|ATPA_MOUSE	Atp5a1	27	131	160000000	0.93			sp|Q62351|TFR1_MOUSE	Tfrc	29	91	96000000	0.24			sp|Q9JKR6|HYOU1_MOUSE	Hyou1	31	43	20000000	0.0808			sp|Q0V8T9|CTP5A_MOUSE	Cntnap5a	4	4	540000	0.00102			sp|Q8BVI5|STX16_MOUSE	Stx16	4	4	1000000	0.00242			sp|Q8K386|RAB15_MOUSE	Rab15	3	3	1300000	0.00418		sp|Q80UG2|PLXA4_MOUSE	Plxna4
	sp|Q61548|AP180_MOUSE	Snap91	26	187	260000000	1.51			sp|Q91V14|S12A5_MOUSE	Slc12a5	29	62	66000000	0.17			sp|Q03265|ATPA_MOUSE	Atp5a1	30	105	260000000	1.02			sp|Q3TMX7|QSOX2_MOUSE	Qsox2	4	4	1100000	0.00217			sp|Q9DC11|PXDC2_MOUSE	Plxdc2	4	4	970000	0.00225			sp|Q9R0M6|RAB9A_MOUSE	Rab9a	3	3	3900000	0.0124		sp|Q6P5E4|UGGG1_MOUSE	Uggt1
	sp|Q99KI0|ACON_MOUSE	Aco2	25	51	20000000	0.12			sp|P08113|ENPL_MOUSE	Hsp90b1	29	54	100000000	0.26			sp|P50516|VATA_MOUSE	Atp6v1a	30	50	28000000	0.11			sp|O70228|ATP9A_MOUSE	Atp9a	4	4	1300000	0.00241			sp|Q68FE2|ATG9A_MOUSE	Atg9a	4	4	1600000	0.00361			sp|P62071|RRAS2_MOUSE	Rras2	3	3	610000	0.00194		sp|P08113|ENPL_MOUSE	Hsp90b1
	sp|O08553|DPYL2_MOUSE	Dpysl2	24	327	2200000000	13.03			sp|O08553|DPYL2_MOUSE	Dpysl2	28	325	7500000000	18.84			sp|O08532|CA2D1_MOUSE	Cacna2d1	30	46	37000000	0.15			sp|O70589|CSKP_MOUSE	Cask	4	4	980000	0.00187			tr|A2RS43|A2RS43_MOUSE	Pcdh7	4	4	450000	0.00104			sp|Q9DC50|OCTC_MOUSE	Crot	3	3	440000	0.00141		sp|P20029|GRP78_MOUSE	Hspa5
	sp|P63017|HSP7C_MOUSE	Hspa8	24	104	110000000	0.68			sp|Q99KI0|ACON_MOUSE	Aco2	28	50	58000000	0.15			sp|P63038|CH60_MOUSE	Hspd1	29	49	28000000	0.11			sp|Q8BJN4|FNDC9_MOUSE	Fndc9	3	4	580000	0.00111			sp|B1AZP2|DLGP4_MOUSE	Dlgap4	4	4	530000	0.00122			sp|Q9JIS8|S12A4_MOUSE	Slc12a4	3	3	360000	0.00116		sp|Q62188|DPYL3_MOUSE	Dpysl3
	sp|Q91V14|S12A5_MOUSE	Slc12a5	24	55	13000000	0.0769			sp|P50516|VATA_MOUSE	Atp6v1a	28	48	31000000	0.0775			sp|O08553|DPYL2_MOUSE	Dpysl2	27	292	5100000000	20.3			sp|Q8BVI5|STX16_MOUSE	Stx16	3	4	1600000	0.00305			sp|Q3UHN9|NDST1_MOUSE	Ndst1	4	4	530000	0.00123			sp|O70589|CSKP_MOUSE	Cask	3	3	350000	0.00113		sp|P97427|DPYL1_MOUSE	Crmp1
	sp|Q64332|SYN2_MOUSE	Syn2	23	79	42000000	0.25			sp|O08532|CA2D1_MOUSE	Cacna2d1	28	47	67000000	0.17			sp|Q99KI0|ACON_MOUSE	Aco2	27	45	32000000	0.13			sp|Q62205|SCN9A_MOUSE	Scn9a	3	4	990000	0.00188			sp|Q9DCP2|S38A3_MOUSE	Slc38a3	3	6	2900000	0.00674			sp|A2ASS6|TITIN_MOUSE	Ttn	3	3	1100000	0.00358		sp|Q9Z1G4|VPP1_MOUSE	Atp6v0a1
	sp|O08532|CA2D1_MOUSE	Cacna2d1	23	50	22000000	0.13			sp|Q03265|ATPA_MOUSE	Atp5a1	27	101	350000000	0.89			sp|O35098|DPYL4_MOUSE	Dpysl4	26	77	330000000	1.3			sp|Q68FE2|ATG9A_MOUSE	Atg9a	3	4	3100000	0.00588			sp|P62071|RRAS2_MOUSE	Rras2	3	4	1200000	0.00281			sp|Q8CHK3|MBOA7_MOUSE	Mboat7	2	4	310000	0.001		sp|Q9JKR6|HYOU1_MOUSE	Hyou1
	sp|Q6PIC6|AT1A3_MOUSE	Atp1a3	22	125	220000000	1.27			sp|O35098|DPYL4_MOUSE	Dpysl4	27	76	410000000	1.02			sp|Q6PIC6|AT1A3_MOUSE	Atp1a3	26	74	210000000	0.85			sp|Q61418|CLCN4_MOUSE	Clcn4	3	4	670000	0.00127			sp|O70589|CSKP_MOUSE	Cask	3	4	420000	0.000979			sp|Q920N7|SYT12_MOUSE	Syt12	2	3	480000	0.00153		sp|G5E829|AT2B1_MOUSE	Atp2b1
	sp|P08113|ENPL_MOUSE	Hsp90b1	22	59	27000000	0.16			sp|P63038|CH60_MOUSE	Hspd1	27	69	53000000	0.13			sp|Q64332|SYN2_MOUSE	Syn2	26	56	56000000	0.22			sp|Q3TWI9|CSCL2_MOUSE	Tmem63b	3	4	990000	0.00188			sp|Q8C561|LMBD2_MOUSE	Lmbrd2	3	3	730000	0.00168			sp|Q68FE2|ATG9A_MOUSE	Atg9a	2	3	1300000	0.00419		sp|Q8BHN3|GANAB_MOUSE	Ganab
	sp|P27773|PDIA3_MOUSE	Pdia3	22	56	18000000	0.1			sp|P17710|HXK1_MOUSE	Hk1	27	49	57000000	0.14			sp|Q62351|TFR1_MOUSE	Tfrc	26	49	29000000	0.12			sp|Q9R0M6|RAB9A_MOUSE	Rab9a	3	3	1100000	0.00208			sp|Q62083|PICK1_MOUSE	Pick1	3	3	660000	0.00153			sp|Q9JKC6|CEND_MOUSE	Cend1	2	3	1000000	0.00322		sp|P63038|CH60_MOUSE	Hspd1
	sp|P62761|VISL1_MOUSE	Vsnl1	21	221	430000000	2.53			sp|Q5SV85|SYNRG_MOUSE	Synrg	27	35	29000000	0.0724			sp|P08113|ENPL_MOUSE	Hsp90b1	26	45	40000000	0.16			sp|Q8C561|LMBD2_MOUSE	Lmbrd2	3	3	840000	0.0016			tr|Q3TY98|Q3TY98_MOUSE	Atp6v0a1	3	3	570000	0.00131			sp|O70309|ITB5_MOUSE	Itgb5	2	2	460000	0.00145		sp|O89001|CBPD_MOUSE	Cpd
	sp|P17710|HXK1_MOUSE	Hk1	21	76	30000000	0.18			sp|Q6PIC6|AT1A3_MOUSE	Atp1a3	26	81	450000000	1.12			sp|Q68FD5|CLH1_MOUSE	Cltc	26	31	6200000	0.0244			tr|A2RS43|A2RS43_MOUSE	Pcdh7	3	3	600000	0.00114			sp|Q9CY18|SNX7_MOUSE	Snx7	3	3	790000	0.00182			tr|Q3TY98|Q3TY98_MOUSE	Atp6v0a1	2	2	350000	0.00113		sp|P46460|NSF_MOUSE	Nsf
	sp|P63038|CH60_MOUSE	Hspd1	21	75	20000000	0.12			sp|Q64332|SYN2_MOUSE	Syn2	26	65	120000000	0.29			sp|P63017|HSP7C_MOUSE	Hspa8	24	74	140000000	0.56			sp|Q62083|PICK1_MOUSE	Pick1	3	3	1200000	0.00231			sp|Q8BG16|S6A15_MOUSE	Slc6a15	3	3	500000	0.00115			sp|P35276|RAB3D_MOUSE	Rab3d	2	2	1000000	0.00321		sp|P70704|AT8A1_MOUSE	Atp8a1
	sp|O35098|DPYL4_MOUSE	Dpysl4	20	96	120000000	0.69			sp|Q3UNH4|GRIN1_MOUSE	Gprin1	26	63	63000000	0.16			sp|P11499|HS90B_MOUSE	Hsp90ab1	23	54	25000000	0.0987			sp|P35282|RAB21_MOUSE	Rab21	3	3	720000	0.00137			sp|Q640M6|GDPD5_MOUSE	Gdpd5	3	3	1200000	0.00286			sp|Q9Z0S9|PRAF1_MOUSE	Rabac1	2	2	650000	0.00207		sp|P35564|CALX_MOUSE	Canx
	sp|O08599|STXB1_MOUSE	Stxbp1	20	64	10000000	0.0594			sp|Q68FD5|CLH1_MOUSE	Cltc	26	33	9100000	0.023			sp|Q9D0K2|SCOT1_MOUSE	Oxct1	23	49	21000000	0.0843			sp|Q68ED2|GRM7_MOUSE	Grm7	3	3	410000	0.000781			sp|Q61112|CAB45_MOUSE	Sdf4	3	3	400000	0.000916			sp|Q8BVI5|STX16_MOUSE	Stx16	2	2	400000	0.00129		sp|Q99KI0|ACON_MOUSE	Aco2
	sp|P11499|HS90B_MOUSE	Hsp90ab1	20	58	16000000	0.0973			sp|P35564|CALX_MOUSE	Canx	25	84	200000000	0.49			sp|Q91V14|S12A5_MOUSE	Slc12a5	23	41	23000000	0.0896			tr|Q3TY98|Q3TY98_MOUSE	Atp6v0a1	3	3	780000	0.00148			sp|Q91VU1|YIPF1_MOUSE	Yipf1	3	3	980000	0.00227			sp|Q8C561|LMBD2_MOUSE	Lmbrd2	2	2	230000	0.000749		sp|Q9Z0R4|ITSN1_MOUSE	Itsn1
	sp|P38647|GRP75_MOUSE	Hspa9	20	53	20000000	0.12			sp|P63017|HSP7C_MOUSE	Hspa8	25	75	220000000	0.55			sp|P35564|CALX_MOUSE	Canx	22	74	110000000	0.43			sp|Q8CIP5|DISP2_MOUSE	Disp2	3	3	220000	0.00041			sp|P53986|MOT1_MOUSE	Slc16a1	3	3	710000	0.00164			sp|Q8BG16|S6A15_MOUSE	Slc6a15	2	2	190000	0.000595		sp|Q61879|MYH10_MOUSE	Myh10
	sp|Q9Z0R4|ITSN1_MOUSE	Itsn1	20	34	5000000	0.0297			sp|Q60902|EP15R_MOUSE	Eps15l1	25	34	15000000	0.0375			sp|Q8VDN2|AT1A1_MOUSE	Atp1a1	22	69	170000000	0.66			sp|Q9DBU0|TM9S1_MOUSE	Tm9sf1	3	3	10000000	0.0194			sp|O08912|GALT1_MOUSE	Galnt1	3	3	420000	0.000974			sp|Q8BZ00|SL9A9_MOUSE	Slc9a9	2	2	140000	0.000431		sp|O08532|CA2D1_MOUSE	Cacna2d1
	sp|P39053|DYN1_MOUSE	Dnm1	20	30	15000000	0.0866			sp|Q6P5E4|UGGG1_MOUSE	Uggt1	25	26	7800000	0.0196			sp|P61264|STX1B_MOUSE	Stx1b	22	48	36000000	0.14			sp|Q640M6|GDPD5_MOUSE	Gdpd5	3	3	2100000	0.00395			sp|Q5FWK3|RHG01_MOUSE	Arhgap1	3	3	560000	0.00129			sp|Q9JM63|KCJ10_MOUSE	Kcnj10	2	2	400000	0.00126		sp|Q60902|EP15R_MOUSE	Eps15l1
	sp|P35564|CALX_MOUSE	Canx	19	93	65000000	0.39			sp|Q8VDN2|AT1A1_MOUSE	Atp1a1	24	72	210000000	0.52			sp|Q3UNH4|GRIN1_MOUSE	Gprin1	22	47	21000000	0.0834			sp|Q3TD49|SPP2B_MOUSE	Sppl2b	3	3	930000	0.00177			sp|Q91V92|ACLY_MOUSE	Acly	3	3	350000	0.000803			sp|Q8C0Z1|F234A_MOUSE	Fam234a	2	2	180000	0.000579		sp|P11627|L1CAM_MOUSE	L1cam
	sp|P60710|ACTB_MOUSE	Actb	19	86	110000000	0.67			sp|P38647|GRP75_MOUSE	Hspa9	24	43	66000000	0.17			sp|Q9D394|RUFY3_MOUSE	Rufy3	21	70	100000000	0.4			sp|Q8BR86|KIRR3_MOUSE	Kirrel3	3	3	640000	0.00123			sp|P51660|DHB4_MOUSE	Hsd17b4	3	3	540000	0.00125			sp|Q9JHS3|LTOR2_MOUSE	Lamtor2	2	2	900000	0.00287		sp|O35526|STX1A_MOUSE	Stx1a
	sp|Q9Z1G4|VPP1_MOUSE	Atp6v0a1	19	73	34000000	0.2			sp|Q9JKR6|HYOU1_MOUSE	Hyou1	24	36	18000000	0.0461			sp|P17710|HXK1_MOUSE	Hk1	21	40	27000000	0.11			sp|Q3TFQ1|SPRY7_MOUSE	Spryd7	3	3	1900000	0.00357			sp|P55012|S12A2_MOUSE	Slc12a2	3	3	330000	0.000773			sp|Q8R1F6|HID1_MOUSE	Hid1	2	2	220000	0.000695		sp|Q810U4|NRCAM_MOUSE	Nrcam
	sp|P10852|4F2_MOUSE	Slc3a2	19	63	30000000	0.18			sp|Q9D394|RUFY3_MOUSE	Rufy3	23	87	220000000	0.56			sp|P38647|GRP75_MOUSE	Hspa9	21	37	32000000	0.13			sp|Q91V92|ACLY_MOUSE	Acly	3	3	460000	0.000874			sp|B0F2B4|NLGN4_MOUSE	Nlgn4l	2	3	410000	0.000945			sp|Q91VU1|YIPF1_MOUSE	Yipf1	2	2	600000	0.00192		sp|Q61548|AP180_MOUSE	Snap91
	sp|Q9ERD7|TBB3_MOUSE	Tubb3	19	61	50000000	0.3			sp|P70207|PLXA2_MOUSE	Plxna2	23	28	8200000	0.0207			sp|P27773|PDIA3_MOUSE	Pdia3	21	37	35000000	0.14			sp|O70318|E41L2_MOUSE	Epb41l2	3	3	730000	0.00139			sp|Q3TY60|F131B_MOUSE	Fam131b	2	3	690000	0.0016			sp|Q9CRB8|MTFP1_MOUSE	Mtfp1	2	2	190000	0.000621		sp|Q8VDN2|AT1A1_MOUSE	Atp1a1
	sp|Q60902|EP15R_MOUSE	Eps15l1	19	33	9200000	0.0546			sp|P11499|HS90B_MOUSE	Hsp90ab1	22	52	47000000	0.12			sp|Q9Z1G4|VPP1_MOUSE	Atp6v0a1	20	63	55000000	0.22			sp|P55012|S12A2_MOUSE	Slc12a2	3	3	530000	0.001			sp|P35282|RAB21_MOUSE	Rab21	2	3	670000	0.00154			sp|Q8VCV1|AB17C_MOUSE	Abhd17c	2	2	250000	0.000813		sp|P17710|HXK1_MOUSE	Hk1
	sp|Q9D394|RUFY3_MOUSE	Rufy3	18	76	65000000	0.39			sp|P27773|PDIA3_MOUSE	Pdia3	22	41	44000000	0.11			sp|Q9ERD7|TBB3_MOUSE	Tubb3	20	51	110000000	0.45			sp|Q5FWK3|RHG01_MOUSE	Arhgap1	3	3	1200000	0.00222			sp|Q8K1S2|UNC5D_MOUSE	Unc5d	2	2	210000	0.000488			sp|Q61220|NELL2_MOUSE	Nell2	2	2	260000	0.000843		sp|Q5SV85|SYNRG_MOUSE	Synrg
	sp|G5E829|AT2B1_MOUSE	Atp2b1	18	68	29000000	0.17			sp|P46460|NSF_MOUSE	Nsf	22	30	15000000	0.0379			sp|Q60902|EP15R_MOUSE	Eps15l1	20	24	5300000	0.0211			sp|Q8CHK3|MBOA7_MOUSE	Mboat7	2	5	470000	0.000898			sp|P35276|RAB3D_MOUSE	Rab3d	2	2	1200000	0.00279			sp|Q9WUH1|TM115_MOUSE	Tmem115	2	2	470000	0.0015		sp|Q03265|ATPA_MOUSE	Atp5a1
	sp|Q3UNH4|GRIN1_MOUSE	Gprin1	18	67	26000000	0.15			sp|Q9Z0R4|ITSN1_MOUSE	Itsn1	22	27	13000000	0.033			sp|Q810U4|NRCAM_MOUSE	Nrcam	20	23	5400000	0.0213			sp|O70340|NPTX2_MOUSE	Nptx2	2	4	260000	0.000503			sp|P23188|FURIN_MOUSE	Furin	2	2	450000	0.00104			sp|Q9EPL2|CSTN1_MOUSE	Clstn1	2	2	390000	0.00123		sp|Q3UNH4|GRIN1_MOUSE	Gprin1
	sp|P50516|VATA_MOUSE	Atp6v1a	18	39	12000000	0.0715			sp|Q8BHN3|GANAB_MOUSE	Ganab	22	26	14000000	0.0349			sp|P70207|PLXA2_MOUSE	Plxna2	20	21	4000000	0.016			sp|Q8K1S2|UNC5D_MOUSE	Unc5d	2	3	320000	0.000614			sp|Q8CJ61|CKLF4_MOUSE	Cmtm4	2	2	160000	0.000368			sp|Q3TD49|SPP2B_MOUSE	Sppl2b	2	2	350000	0.00112		sp|P62814|VATB2_MOUSE	Atp6v1b2
	sp|Q9JKR6|HYOU1_MOUSE	Hyou1	18	26	3200000	0.019			sp|Q9Z1G4|VPP1_MOUSE	Atp6v0a1	21	66	99000000	0.25			sp|P62761|VISL1_MOUSE	Vsnl1	19	155	780000000	3.09			sp|Q3UVK0|ERMP1_MOUSE	Ermp1	2	3	220000	0.000413			sp|Q62205|SCN9A_MOUSE	Scn9a	2	2	280000	0.000641			sp|Q9D123|TM219_MOUSE	Tmem219	2	2	530000	0.00169		sp|P61264|STX1B_MOUSE	Stx1b
	sp|Q68FD5|CLH1_MOUSE	Cltc	18	22	3000000	0.0179			sp|Q80TZ3|AUXI_MOUSE	Dnajc6	21	53	78000000	0.2			sp|P60710|ACTB_MOUSE	Actb	19	105	170000000	0.66			tr|A0A1W2P7Y9|A0A1W2P7Y9_MOUSE	Nrcam	2	3	700000	0.00134			sp|Q91VX9|TM168_MOUSE	Tmem168	2	2	240000	0.000549			sp|Q61112|CAB45_MOUSE	Sdf4	2	2	97000	0.00031		sp|P70207|PLXA2_MOUSE	Plxna2
	sp|Q8VDN2|AT1A1_MOUSE	Atp1a1	17	134	170000000	0.99			sp|G5E829|AT2B1_MOUSE	Atp2b1	21	44	57000000	0.14			sp|P28663|SNAB_MOUSE	Napb	19	71	92000000	0.36			sp|Q3UHN9|NDST1_MOUSE	Ndst1	2	3	420000	0.000806			sp|Q9R0M6|RAB9A_MOUSE	Rab9a	2	2	700000	0.0016			sp|Q8C407|YIPF4_MOUSE	Yipf4	2	2	1000000	0.0032		sp|Q64487|PTPRD_MOUSE	Ptprd
	sp|P18872|GNAO_MOUSE	Gnao1	17	63	110000000	0.63			sp|Q9D0K2|SCOT1_MOUSE	Oxct1	21	41	35000000	0.0871			sp|P18872|GNAO_MOUSE	Gnao1	19	65	120000000	0.49			sp|P23188|FURIN_MOUSE	Furin	2	2	370000	0.00071			sp|Q8BR86|KIRR3_MOUSE	Kirrel3	2	2	290000	0.000667			sp|P63323|RS12_MOUSE	Rps12	2	2	710000	0.00227		sp|O08553|DPYL2_MOUSE	Dpysl2
	sp|P61264|STX1B_MOUSE	Stx1b	17	56	22000000	0.13			sp|Q6GQT9|NOMO1_MOUSE	Nomo1	21	26	14000000	0.0363			sp|P14211|CALR_MOUSE	Calr	19	52	73000000	0.29			sp|P21661|NEC2_MOUSE	Pcsk2	2	2	660000	0.00126			sp|Q9JHS3|LTOR2_MOUSE	Lamtor2	2	2	960000	0.00221			sp|Q9WTL2|RAB25_MOUSE	Rab25	1	4	1900000	0.00601		sp|Q9D394|RUFY3_MOUSE	Rufy3
	sp|Q9D0K2|SCOT1_MOUSE	Oxct1	17	54	17000000	0.0985			sp|Q80TJ1|CAPS1_MOUSE	Cadps	21	24	5000000	0.0126			sp|Q99KN9|EPN4_MOUSE	Clint1	19	50	27000000	0.11			sp|P52194|CLGN_MOUSE	Clgn	2	2	140000	0.000273			sp|P51174|ACADL_MOUSE	Acadl	2	2	460000	0.00107			sp|Q61194|P3C2A_MOUSE	Pik3c2a	1	3	2200000	0.00697		sp|O35098|DPYL4_MOUSE	Dpysl4
	sp|Q8BFU3|RN214_MOUSE	Rnf214	16	84	17000000	0.1			sp|Q61879|MYH10_MOUSE	Myh10	21	23	3900000	0.00984			sp|G5E829|AT2B1_MOUSE	Atp2b1	19	33	19000000	0.0736			sp|Q60738|ZNT1_MOUSE	Slc30a1	2	2	820000	0.00157			sp|Q9WUH1|TM115_MOUSE	Tmem115	2	2	400000	0.000921			sp|Q8CJ61|CKLF4_MOUSE	Cmtm4	1	2	160000	0.000523		sp|O08599|STXB1_MOUSE	Stxbp1
	sp|P28663|SNAB_MOUSE	Napb	16	81	49000000	0.29			sp|P60710|ACTB_MOUSE	Actb	20	96	270000000	0.68			sp|P46460|NSF_MOUSE	Nsf	19	28	8600000	0.0343			tr|A2AR26|A2AR26_MOUSE	Slc2a6	2	2	540000	0.00103			sp|Q6PHN9|RAB35_MOUSE	Rab35	2	2	430000	0.000999			sp|Q8BJN4|FNDC9_MOUSE	Fndc9	1	2	71000	0.000225		sp|P70414|NAC1_MOUSE	Slc8a1
	sp|Q80TZ3|AUXI_MOUSE	Dnajc6	16	46	22000000	0.13			sp|Q9ERD7|TBB3_MOUSE	Tubb3	20	76	390000000	0.97			sp|Q8BHN3|GANAB_MOUSE	Ganab	19	24	6400000	0.0254			sp|B0F2B4|NLGN4_MOUSE	Nlgn4l	2	2	590000	0.00112			sp|Q920N7|SYT12_MOUSE	Syt12	2	2	370000	0.000846			sp|Q8QZY6|TSN14_MOUSE	Tspan14	1	2	240000	0.000767		sp|Q6PIE5|AT1A2_MOUSE	Atp1a2
	sp|Q5SV85|SYNRG_MOUSE	Synrg	16	29	6100000	0.0363			sp|P61264|STX1B_MOUSE	Stx1b	20	40	38000000	0.095			sp|Q64521|GPDM_MOUSE	Gpd2	19	22	6200000	0.0248			sp|Q9CY18|SNX7_MOUSE	Snx7	2	2	640000	0.00121			sp|Q9DBU0|TM9S1_MOUSE	Tm9sf1	2	2	870000	0.00202			sp|Q9CZH7|MXRA7_MOUSE	Mxra7	1	2	98000	0.000314		sp|P38647|GRP75_MOUSE	Hspa9
	sp|Q8JZP2|SYN3_MOUSE	Syn3	16	26	7900000	0.0465			sp|P70414|NAC1_MOUSE	Slc8a1	20	36	21000000	0.054			sp|Q6P5E4|UGGG1_MOUSE	Uggt1	19	21	2800000	0.0111			sp|P03921|NU5M_MOUSE	Mtnd5	2	2	230000	0.000441			sp|Q9DC61|MPPA_MOUSE	Pmpca	2	2	250000	0.000572			tr|E9Q3Q6|E9Q3Q6_MOUSE	Alcam	1	2	62000	0.000199		sp|Q9ES97|RTN3_MOUSE	Rtn3
	sp|Q810U3|NFASC_MOUSE	Nfasc	16	18	3000000	0.0176			sp|P62761|VISL1_MOUSE	Vsnl1	19	139	770000000	1.93			sp|P60879|SNP25_MOUSE	Snap25	18	41	37000000	0.15			sp|Q8BI84|MIA3_MOUSE	Mia3	2	2	160000	0.000311			sp|Q99JH8|ERD21_MOUSE	Kdelr1	2	2	930000	0.00214			sp|Q921I1|TRFE_MOUSE	Tf	1	2	150000	0.000478		sp|P70232|NCHL1_MOUSE	Chl1
	sp|Q8K0T0|RTN1_MOUSE	Rtn1	15	59	20000000	0.12			sp|P28663|SNAB_MOUSE	Napb	19	70	65000000	0.16			sp|Q80TZ3|AUXI_MOUSE	Dnajc6	18	36	23000000	0.0894			sp|P22723|GBRG2_MOUSE	Gabrg2	2	2	260000	0.000497			sp|Q68ED2|GRM7_MOUSE	Grm7	2	2	130000	0.000296			sp|Q9JI59|JAM2_MOUSE	Jam2	1	1	75000	0.000241		sp|Q64521|GPDM_MOUSE	Gpd2
	sp|P60879|SNP25_MOUSE	Snap25	15	56	38000000	0.22			sp|P14211|CALR_MOUSE	Calr	19	53	140000000	0.34			sp|Q5SV85|SYNRG_MOUSE	Synrg	18	21	11000000	0.0418			sp|Q6PHN9|RAB35_MOUSE	Rab35	2	2	640000	0.00121			sp|Q3TFQ1|SPRY7_MOUSE	Spryd7	2	2	1200000	0.00276			sp|P42703|LIFR_MOUSE	Lifr	1	1	48000	0.000153		sp|Q6GQT9|NOMO1_MOUSE	Nomo1
	sp|Q9CWZ7|SNAG_MOUSE	Napg	15	50	26000000	0.15			sp|P11627|L1CAM_MOUSE	L1cam	19	49	56000000	0.14			sp|P70414|NAC1_MOUSE	Slc8a1	17	34	14000000	0.0568			sp|P97411|ICA69_MOUSE	Ica1	2	2	330000	0.000631			sp|Q7M759|AB17B_MOUSE	Abhd17b	2	2	740000	0.00171			sp|Q91ZW2|OFUT1_MOUSE	Pofut1	1	1	130000	0.000429		sp|Q6PIC6|AT1A3_MOUSE	Atp1a3
	sp|P97792|CXAR_MOUSE	Cxadr	15	35	18000000	0.11			sp|Q8K0T0|RTN1_MOUSE	Rtn1	19	45	30000000	0.0756			sp|Q9ES97|RTN3_MOUSE	Rtn3	17	28	17000000	0.0655			sp|Q8BG16|S6A15_MOUSE	Slc6a15	2	2	310000	0.000598			sp|P03921|NU5M_MOUSE	Mtnd5	2	2	220000	0.000515			sp|Q62083|PICK1_MOUSE	Pick1	1	1	93000	0.000297		sp|P63017|HSP7C_MOUSE	Hspa8
	sp|Q9Z2H5|E41L1_MOUSE	Epb41l1	15	34	5100000	0.0299			sp|Q64521|GPDM_MOUSE	Gpd2	19	21	6900000	0.0173			sp|O89001|CBPD_MOUSE	Cpd	17	22	4500000	0.0179			sp|P51791|CLCN3_MOUSE	Clcn3	2	2	500000	0.000942			sp|Q8JZS0|LIN7A_MOUSE	Lin7a	2	2	190000	0.000435			sp|O70340|NPTX2_MOUSE	Nptx2	1	1	99000	0.000316		sp|Q64332|SYN2_MOUSE	Syn2
	sp|P58252|EF2_MOUSE	Eef2	15	30	5800000	0.0342			sp|P18872|GNAO_MOUSE	Gnao1	18	71	250000000	0.62			sp|Q80TJ1|CAPS1_MOUSE	Cadps	17	18	2500000	0.00973			sp|Q8BGN5|NPAL3_MOUSE	Nipal3	2	2	240000	0.00046			sp|P63242|IF5A1_MOUSE	Eif5a	2	2	49000	0.000113			sp|P52194|CLGN_MOUSE	Clgn	1	1	36000	0.000115		sp|P11499|HS90B_MOUSE	Hsp90ab1
	sp|Q6GQT9|NOMO1_MOUSE	Nomo1	15	19	2000000	0.0121			sp|Q8BFU3|RN214_MOUSE	Rnf214	18	37	40000000	0.0995			sp|P68369|TBA1A_MOUSE	Tuba1a	16	62	260000000	1.02			sp|Q9Z2W8|GRIA4_MOUSE	Gria4	2	2	400000	0.000758			sp|Q9WTP2|SPY4_MOUSE	Spry4	2	2	290000	0.000659			tr|A3KGR9|A3KGR9_MOUSE	H13	1	1	220000	0.000703		sp|P39053|DYN1_MOUSE	Dnm1
	sp|P84084|ARF5_MOUSE	Arf5	14	111	210000000	1.24			sp|P97792|CXAR_MOUSE	Cxadr	18	32	61000000	0.15			sp|P10852|4F2_MOUSE	Slc3a2	16	47	57000000	0.22			sp|Q9DC50|OCTC_MOUSE	Crot	2	2	280000	0.000528			sp|P51830|ADCY9_MOUSE	Adcy9	2	2	180000	0.000405			sp|Q91WK5|GCSH_MOUSE	Gcsh	1	1	79000	0.000251		sp|Q8K0T0|RTN1_MOUSE	Rtn1
	sp|P68369|TBA1A_MOUSE	Tuba1a	14	80	190000000	1.15			sp|O35526|STX1A_MOUSE	Stx1a	18	27	18000000	0.0447			sp|Q8BFU3|RN214_MOUSE	Rnf214	16	33	18000000	0.0721			sp|P62071|RRAS2_MOUSE	Rras2	2	2	1000000	0.00191			sp|Q9EPL2|CSTN1_MOUSE	Clstn1	2	2	510000	0.00117			tr|Q50HX0|Q50HX0_MOUSE	Rab14	1	1	79000	0.000251		sp|P27773|PDIA3_MOUSE	Pdia3
	sp|Q9Z0P4|PALM_MOUSE	Palm	14	41	29000000	0.17			sp|P58252|EF2_MOUSE	Eef2	18	25	11000000	0.0268			sp|P40142|TKT_MOUSE	Tkt	16	25	13000000	0.0519			sp|P98200|AT8A2_MOUSE	Atp8a2	2	2	340000	0.000646			sp|Q3TD49|SPP2B_MOUSE	Sppl2b	2	2	370000	0.000861			sp|Q8CIP5|DISP2_MOUSE	Disp2	1	1	91000	0.000291		sp|Q9Z2H5|E41L1_MOUSE	Epb41l1
	sp|P46460|NSF_MOUSE	Nsf	14	38	7200000	0.0428			sp|Q9WU78|PDC6I_MOUSE	Pdcd6ip	18	22	9400000	0.0235			sp|Q9Z2H5|E41L1_MOUSE	Epb41l1	16	24	9300000	0.0369			sp|Q8K2L8|TPC12_MOUSE	Trappc12	2	2	480000	0.000909			tr|E9PWG2|E9PWG2_MOUSE	Trappc8	2	2	150000	0.000353			tr|A2AR26|A2AR26_MOUSE	Slc2a6	1	1	110000	0.000356		sp|P58252|EF2_MOUSE	Eef2
	sp|Q9ES97|RTN3_MOUSE	Rtn3	14	35	15000000	0.0904			sp|P68369|TBA1A_MOUSE	Tuba1a	17	94	770000000	1.93			sp|P58252|EF2_MOUSE	Eef2	16	22	5300000	0.0209			sp|P84091|AP2M1_MOUSE	Ap2m1	2	2	220000	0.000416			sp|Q8BJN4|FNDC9_MOUSE	Fndc9	2	2	240000	0.000547			sp|Q9D1I5|MCEE_MOUSE	Mcee	1	1	110000	0.00035		sp|Q99P72|RTN4_MOUSE	Rtn4
	sp|P40142|TKT_MOUSE	Tkt	14	29	7900000	0.0465			sp|Q99KN9|EPN4_MOUSE	Clint1	17	56	85000000	0.21			sp|Q91YQ5|RPN1_MOUSE	Rpn1	16	19	3100000	0.0124			sp|Q61271|ACV1B_MOUSE	Acvr1b	2	2	280000	0.000526			sp|Q61418|CLCN4_MOUSE	Clcn4	2	2	420000	0.000978			sp|Q91VX9|TM168_MOUSE	Tmem168	1	1	130000	0.000413		sp|Q80TJ1|CAPS1_MOUSE	Cadps
	sp|Q9DC07|LNEBL_MOUSE	Nebl	14	21	3800000	0.0225			sp|Q9Z2H5|E41L1_MOUSE	Epb41l1	17	34	20000000	0.0495			sp|Q8K1M6|DNM1L_MOUSE	Dnm1l	16	16	2500000	0.00971			sp|P16014|SCG1_MOUSE	Chgb	2	2	410000	0.000786			sp|Q8R1I1|QCR9_MOUSE	Uqcr10	2	2	1700000	0.00383			sp|O08545|EFNA3_MOUSE	Efna3	1	1	320000	0.00103		sp|Q9EPN1|NBEA_MOUSE	Nbea
	sp|Q6PB44|PTN23_MOUSE	Ptpn23	14	18	2600000	0.0151			sp|P60879|SNP25_MOUSE	Snap25	17	33	34000000	0.0863			sp|Q9CWF2|TBB2B_MOUSE	Tubb2b	15	50	62000000	0.24			tr|F7BJK1|F7BJK1_MOUSE	Pcdh1	2	2	970000	0.00185			sp|O08747|UNC5C_MOUSE	Unc5c	2	2	230000	0.000531			sp|P23188|FURIN_MOUSE	Furin	1	1	220000	0.000703		sp|Q9ERD7|TBB3_MOUSE	Tubb3
	sp|Q64487|PTPRD_MOUSE	Ptprd	14	16	1200000	0.00685			sp|D3Z7P3|GLSK_MOUSE	Gls	17	33	15000000	0.0389			sp|Q60932|VDAC1_MOUSE	Vdac1	15	49	220000000	0.86			sp|Q8CGQ8|NCKX4_MOUSE	Slc24a4	2	2	490000	0.000939			sp|Q8C407|YIPF4_MOUSE	Yipf4	2	2	1700000	0.00381			tr|A0A1L1SV25|A0A1L1SV25_MOUSE	Actn4	1	1	160000	0.000521		sp|P14211|CALR_MOUSE	Calr
	sp|P06837|NEUM_MOUSE	Gap43	13	193	120000000	0.74			sp|Q6Q477|AT2B4_MOUSE	Atp2b4	17	32	75000000	0.19			sp|O35526|STX1A_MOUSE	Stx1a	15	28	12000000	0.0478			sp|B1AZP2|DLGP4_MOUSE	Dlgap4	2	2	350000	0.000668			sp|Q3TWI9|CSCL2_MOUSE	Tmem63b	2	2	410000	0.000942			sp|O70228|ATP9A_MOUSE	Atp9a	1	1	250000	0.000785		sp|Q8BFU3|RN214_MOUSE	Rnf214
	sp|Q60932|VDAC1_MOUSE	Vdac1	13	129	130000000	0.77			sp|O08599|STXB1_MOUSE	Stxbp1	17	27	12000000	0.031			sp|Q9R0K7|AT2B2_MOUSE	Atp2b2	15	20	11000000	0.044			sp|P53986|MOT1_MOUSE	Slc16a1	2	2	750000	0.00143			sp|A2AGL3|RYR3_MOUSE	Ryr3	1	3	1600000	0.00366			sp|Q8CH36|S36A4_MOUSE	Slc36a4	1	1	290000	0.000934		sp|Q80TZ3|AUXI_MOUSE	Dnajc6
	sp|Q9CWF2|TBB2B_MOUSE	Tubb2b	13	66	27000000	0.16			sp|P70232|NCHL1_MOUSE	Chl1	17	22	9300000	0.0233			sp|O08599|STXB1_MOUSE	Stxbp1	15	19	6500000	0.0256			sp|Q14CH0|F171B_MOUSE	Fam171b	2	2	340000	0.000648			sp|Q8CHK3|MBOA7_MOUSE	Mboat7	1	2	64000	0.000147			sp|Q60738|ZNT1_MOUSE	Slc30a1	1	1	130000	0.000411		sp|P46096|SYT1_MOUSE	Syt1
	sp|Q9CQW1|YKT6_MOUSE	Ykt6	13	54	48000000	0.28			sp|Q810U3|NFASC_MOUSE	Nfasc	17	18	8500000	0.0214			sp|O08917|FLOT1_MOUSE	Flot1	15	18	3600000	0.0142			sp|Q91VU1|YIPF1_MOUSE	Yipf1	2	2	960000	0.00182			sp|P22723|GBRG2_MOUSE	Gabrg2	1	2	130000	0.00031			sp|Q9CYS6|CB072_MOUSE		1	1	110000	0.000358		sp|Q9R0K7|AT2B2_MOUSE	Atp2b2
	sp|Q99KN9|EPN4_MOUSE	Clint1	13	46	25000000	0.15			sp|Q8JZP2|SYN3_MOUSE	Syn3	16	40	17000000	0.0436			sp|P39053|DYN1_MOUSE	Dnm1	15	16	15000000	0.0594			sp|Q8K1S4|UNC5A_MOUSE	Unc5a	2	2	230000	0.000438			sp|Q9CYS6|CB072_MOUSE		1	2	200000	0.00047			sp|Q99JW1|AB17A_MOUSE	Abhd17a	1	1	190000	0.000618		sp|Q8K1M6|DNM1L_MOUSE	Dnm1l
	sp|Q60598|SRC8_MOUSE	Cttn	13	44	32000000	0.19			sp|P10852|4F2_MOUSE	Slc3a2	16	33	57000000	0.14			sp|P84084|ARF5_MOUSE	Arf5	14	67	400000000	1.58			sp|P63001|RAC1_MOUSE	Rac1	2	2	1200000	0.00221			tr|Q50HX0|Q50HX0_MOUSE	Rab14	1	2	160000	0.00037			sp|Q61335|BAP31_MOUSE	Bcap31	1	1	56000	0.000178		sp|Q9DBG3|AP2B1_MOUSE	Ap2b1
	sp|P08249|MDHM_MOUSE	Mdh2	13	40	21000000	0.12			sp|Q9Z0P4|PALM_MOUSE	Palm	16	31	46000000	0.12			sp|Q60598|SRC8_MOUSE	Cttn	14	31	29000000	0.11			sp|Q8C031|LRC4C_MOUSE	Lrrc4c	2	2	340000	0.000653			sp|Q80XU8|LRFN4_MOUSE	Lrfn4	1	2	280000	0.000655			sp|Q8BR86|KIRR3_MOUSE	Kirrel3	1	1	140000	0.000433		sp|Q9D0K2|SCOT1_MOUSE	Oxct1
	sp|P14211|CALR_MOUSE	Calr	13	39	23000000	0.14			sp|Q810U4|NRCAM_MOUSE	Nrcam	16	28	13000000	0.0314			sp|P62814|VATB2_MOUSE	Atp6v1b2	14	27	22000000	0.089			sp|Q9CXV1|DHSD_MOUSE	Sdhd	2	2	390000	0.000742			sp|P47708|RP3A_MOUSE	Rph3a	1	2	91000	0.000211			sp|Q6PHN9|RAB35_MOUSE	Rab35	1	1	150000	0.000488		sp|P10852|4F2_MOUSE	Slc3a2
	sp|D3Z7P3|GLSK_MOUSE	Gls	13	35	5300000	0.0311			sp|Q9ES97|RTN3_MOUSE	Rtn3	16	25	14000000	0.0345			sp|P97792|CXAR_MOUSE	Cxadr	14	23	23000000	0.0904			sp|Q9WTL2|RAB25_MOUSE	Rab25	1	4	3200000	0.006			sp|Q8BGN5|NPAL3_MOUSE	Nipal3	1	2	200000	0.000459			sp|O09005|DEGS1_MOUSE	Degs1	1	1	110000	0.000365		sp|Q9Z218|DPP6_MOUSE	Dpp6
	sp|P70414|NAC1_MOUSE	Slc8a1	13	34	6300000	0.0375			sp|Q80U56|AVL9_MOUSE	Avl9	16	24	8000000	0.0202			sp|Q9ERB0|SNP29_MOUSE	Snap29	14	20	16000000	0.0615			tr|E9Q3Q6|E9Q3Q6_MOUSE	Alcam	1	3	390000	0.000751			sp|Q99KU6|CF089_MOUSE		1	2	70000	0.000163			sp|Q9Z2U1|PSA5_MOUSE	Psma5	1	1	110000	0.000364		sp|Q9WU78|PDC6I_MOUSE	Pdcd6ip
	sp|P62814|VATB2_MOUSE	Atp6v1b2	13	30	17000000	0.0983			sp|O89001|CBPD_MOUSE	Cpd	16	21	14000000	0.0355			sp|Q80U56|AVL9_MOUSE	Avl9	14	18	2600000	0.0102			sp|Q921I1|TRFE_MOUSE	Tf	1	3	950000	0.0018			tr|G5CPP0|G5CPP0_MOUSE	Calr4	1	2	250000	0.000588			sp|O88983|STX8_MOUSE	Stx8	1	1	130000	0.000413		sp|Q810U3|NFASC_MOUSE	Nfasc
	sp|Q810U4|NRCAM_MOUSE	Nrcam	13	27	3800000	0.0227			sp|Q80UG2|PLXA4_MOUSE	Plxna4	16	19	5400000	0.0136			sp|Q9WU78|PDC6I_MOUSE	Pdcd6ip	14	18	4900000	0.0192			sp|O88697|STK16_MOUSE	Stk16	1	2	120000	0.000224			sp|O70318|E41L2_MOUSE	Epb41l2	1	2	200000	0.000463			sp|Q9Z2W9|GRIA3_MOUSE	Gria3	1	1	40000	0.000128		sp|P60710|ACTB_MOUSE	Actb
	sp|Q6Q477|AT2B4_MOUSE	Atp2b4	13	25	19000000	0.11			sp|P09103|PDIA1_MOUSE	P4hb	16	17	5600000	0.014			sp|Q9DBG3|AP2B1_MOUSE	Ap2b1	14	17	2200000	0.0086			tr|Q50HX0|Q50HX0_MOUSE	Rab14	1	2	4000000	0.00767			sp|Q9WTL2|RAB25_MOUSE	Rab25	1	2	2900000	0.00661			sp|Q06138|CAB39_MOUSE	Cab39	1	1	160000	0.000498		sp|Q99KN9|EPN4_MOUSE	Clint1
	sp|Q8BHN3|GANAB_MOUSE	Ganab	13	21	14000000	0.0834			sp|Q64487|PTPRD_MOUSE	Ptprd	16	16	3500000	0.00874			sp|Q61879|MYH10_MOUSE	Myh10	14	16	1500000	0.00586			tr|Q3U7N2|Q3U7N2_MOUSE	Immt	1	2	130000	0.000249			sp|Q99J87|DHX58_MOUSE	Dhx58	1	2	1800000	0.00408			sp|P61205|ARF3_MOUSE	Arf3	1	1	14000	4.4e-05		sp|Q8BVE3|VATH_MOUSE	Atp6v1h
	sp|Q69ZK9|NLGN2_MOUSE	Nlgn2	13	18	2800000	0.0163			sp|P84084|ARF5_MOUSE	Arf5	15	77	500000000	1.25			sp|Q80UG2|PLXA4_MOUSE	Plxna4	14	15	2800000	0.011			sp|Q8K5B2|MCFD2_MOUSE	Mcfd2	1	2	150000	0.000293			sp|O70309|ITB5_MOUSE	Itgb5	1	1	170000	0.000395			sp|Q60963|PAFA_MOUSE	Pla2g7	1	1	190000	0.000605		sp|D3Z7P3|GLSK_MOUSE	Gls
	sp|Q6P5E4|UGGG1_MOUSE	Uggt1	13	15	980000	0.00577			sp|Q9CWF2|TBB2B_MOUSE	Tubb2b	15	71	180000000	0.45			sp|Q6GQT9|NOMO1_MOUSE	Nomo1	14	15	3200000	0.0126			sp|O08747|UNC5C_MOUSE	Unc5c	1	2	420000	0.000794			sp|O08581|KCNK1_MOUSE	Kcnk1	1	1	120000	0.000288			sp|B0F2B4|NLGN4_MOUSE	Nlgn4l	1	1	160000	0.000508		sp|P40142|TKT_MOUSE	Tkt
	sp|Q64521|GPDM_MOUSE	Gpd2	13	15	2100000	0.0124			sp|Q9CWZ7|SNAG_MOUSE	Napg	15	29	43000000	0.11			sp|Q9CQW1|YKT6_MOUSE	Ykt6	13	42	64000000	0.26			sp|Q61165|SL9A1_MOUSE	Slc9a1	1	2	290000	0.000544			sp|Q9CZH7|MXRA7_MOUSE	Mxra7	1	1	170000	0.000382			sp|P51174|ACADL_MOUSE	Acadl	1	1	220000	0.000697		sp|Q9Z1G3|VATC1_MOUSE	Atp6v1c1
	sp|Q9Z0H8|CLIP2_MOUSE	Clip2	13	13	3700000	0.0218			sp|Q9CQF9|PCYOX_MOUSE	Pcyox1	15	25	16000000	0.0402			sp|Q8BGZ1|HPCL4_MOUSE	Hpcal4	13	37	35000000	0.14			tr|A3KMF5|A3KMF5_MOUSE	Dst	1	2	1400000	0.00259			tr|A0A1L1SV25|A0A1L1SV25_MOUSE	Actn4	1	1	250000	0.00058			sp|Q8R1J9|TOR2A_MOUSE	Tor2a	1	1	22000	6.92e-05		sp|Q8JZP2|SYN3_MOUSE	Syn3
	sp|Q91XV3|BASP1_MOUSE	Basp1	12	270	280000000	1.63			sp|Q9ERB0|SNP29_MOUSE	Snap29	15	21	21000000	0.0527			sp|P18242|CATD_MOUSE	Ctsd	13	35	92000000	0.36			sp|Q8CHX7|RFTN2_MOUSE	Rftn2	1	2	120000	0.000232			sp|Q62313|TGON1_MOUSE	Tgoln1	1	1	93000	0.000215			sp|Q9R0A0|PEX14_MOUSE	Pex14	1	1	55000	0.000176		sp|P23819|GRIA2_MOUSE	Gria2
	sp|P54227|STMN1_MOUSE	Stmn1	12	130	170000000	1.01			sp|P26443|DHE3_MOUSE	Glud1	15	18	20000000	0.0498			sp|P62259|1433E_MOUSE	Ywhae	13	31	21000000	0.0843			sp|Q6AXF6|SIDT1_MOUSE	Sidt1	1	2	420000	0.000793			sp|Q91WK5|GCSH_MOUSE	Gcsh	1	1	110000	0.000264			sp|Q5I012|S38AA_MOUSE	Slc38a10	1	1	30000	9.67e-05		sp|Q9QYE6|GOGA5_MOUSE	Golga5
	sp|P26645|MARCS_MOUSE	Marcks	12	93	22000000	0.13			sp|Q9D051|ODPB_MOUSE	Pdhb	15	17	8400000	0.0211			sp|Q9CWZ7|SNAG_MOUSE	Napg	13	29	28000000	0.11			sp|Q9CZ16|T178A_MOUSE	Tmem178a	1	2	500000	0.000957			sp|O88697|STK16_MOUSE	Stk16	1	1	50000	0.000115			tr|A0A0A0MQC6|A0A0A0MQC6_MOUSE	5330417C22Rik	1	1	200000	0.000624		sp|P16056|MET_MOUSE	Met
	sp|P11627|L1CAM_MOUSE	L1cam	12	51	8700000	0.0516			sp|Q91XV3|BASP1_MOUSE	Basp1	14	178	620000000	1.56			sp|P11627|L1CAM_MOUSE	L1cam	13	27	14000000	0.0554			sp|Q9JHS3|LTOR2_MOUSE	Lamtor2	1	1	530000	0.001			sp|Q8BZ00|SL9A9_MOUSE	Slc9a9	1	1	75000	0.000174			sp|P12961|7B2_MOUSE	Scg5	1	1	200000	0.000626		sp|Q9Z0H8|CLIP2_MOUSE	Clip2
	sp|Q8BGZ1|HPCL4_MOUSE	Hpcal4	12	41	33000000	0.2			sp|Q60932|VDAC1_MOUSE	Vdac1	14	50	290000000	0.72			sp|Q9Z0P4|PALM_MOUSE	Palm	13	25	41000000	0.16			sp|Q9JI59|JAM2_MOUSE	Jam2	1	1	100000	0.000193			sp|Q8BG50|TM169_MOUSE	Tmem169	1	1	160000	0.00036			tr|E9PXF0|E9PXF0_MOUSE	Pcdh17	1	1	67000	0.000213		sp|P62761|VISL1_MOUSE	Vsnl1
	sp|Q9ERB0|SNP29_MOUSE	Snap29	12	31	15000000	0.0862			sp|P62814|VATB2_MOUSE	Atp6v1b2	14	28	22000000	0.0562			sp|Q9DCL9|PUR6_MOUSE	Paics	13	22	11000000	0.0451			sp|P55088|AQP4_MOUSE	Aqp4	1	1	150000	0.000289			sp|O88983|STX8_MOUSE	Stx8	1	1	190000	0.000444			sp|Q9EPK2|XRP2_MOUSE	Rp2	1	1	94000	0.0003		sp|P28663|SNAB_MOUSE	Napb
	sp|O35526|STX1A_MOUSE	Stx1a	12	29	7800000	0.0462			sp|P40142|TKT_MOUSE	Tkt	14	27	17000000	0.0426			sp|Q9Z218|DPP6_MOUSE	Dpp6	13	21	9800000	0.039			sp|P35276|RAB3D_MOUSE	Rab3d	1	1	1200000	0.00229			tr|Q8BVJ9|Q8BVJ9_MOUSE	Trip11	1	1	42000	9.63e-05			sp|Q6PDC8|MFD4A_MOUSE	Mfsd4a	1	1	110000	0.000338		sp|Q9Z0P4|PALM_MOUSE	Palm
	sp|Q9CQF9|PCYOX_MOUSE	Pcyox1	12	23	2500000	0.0149			sp|Q9R0K7|AT2B2_MOUSE	Atp2b2	14	24	30000000	0.0752			sp|Q8R1Q8|DC1L1_MOUSE	Dync1li1	13	19	2800000	0.0111			sp|Q8CJ61|CKLF4_MOUSE	Cmtm4	1	1	190000	0.00037			sp|Q5I012|S38AA_MOUSE	Slc38a10	1	1	56000	0.000128			sp|Q8K209|AGRG1_MOUSE	Adgrg1	1	1	170000	0.00053		sp|Q6Q477|AT2B4_MOUSE	Atp2b4
	sp|O89001|CBPD_MOUSE	Cpd	12	18	2400000	0.014			sp|P39053|DYN1_MOUSE	Dnm1	14	19	31000000	0.0773			sp|Q8BVE3|VATH_MOUSE	Atp6v1h	13	19	2700000	0.0107			sp|P17427|AP2A2_MOUSE	Ap2a2	1	1	66000	0.000126			sp|Q9D6M3|GHC1_MOUSE	Slc25a22	1	1	68000	0.000156			sp|Q8JZS0|LIN7A_MOUSE	Lin7a	1	1	49000	0.000157		sp|Q80U56|AVL9_MOUSE	Avl9
	sp|P70207|PLXA2_MOUSE	Plxna2	12	16	1600000	0.00971			sp|Q02819|NUCB1_MOUSE	Nucb1	14	18	5800000	0.0145			sp|P09103|PDIA1_MOUSE	P4hb	13	18	4900000	0.0194			sp|O08581|KCNK1_MOUSE	Kcnk1	1	1	160000	0.000314			sp|Q8K209|AGRG1_MOUSE	Adgrg1	1	1	170000	0.000394			sp|Q8BLC3|LYPD1_MOUSE	Lypd1	1	1	320000	0.00102		sp|Q9CQF9|PCYOX_MOUSE	Pcyox1
	sp|Q8CIN4|PAK2_MOUSE	Pak2	12	15	10000000	0.06			sp|Q8K1M6|DNM1L_MOUSE	Dnm1l	14	16	3900000	0.00985			sp|Q9CQF9|PCYOX_MOUSE	Pcyox1	13	17	7800000	0.0309			sp|P63030|MPC1_MOUSE	Mpc1	1	1	25000	4.81e-05			sp|Q7TN73|CASD1_MOUSE	Casd1	1	1	180000	0.000417			tr|F6U3S2|F6U3S2_MOUSE	Mfsd6	1	1	300000	0.000959		sp|Q6ZQA6|IGSF3_MOUSE	Igsf3
	sp|P62259|1433E_MOUSE	Ywhae	11	34	17000000	0.0994			sp|Q6ZQA6|IGSF3_MOUSE	Igsf3	14	14	4100000	0.0104			sp|P27612|PLAP_MOUSE	Plaa	13	17	3000000	0.0118			sp|Q9CZH7|MXRA7_MOUSE	Mxra7	1	1	75000	0.000142			sp|P17427|AP2A2_MOUSE	Ap2a2	1	1	56000	0.000129			sp|P16014|SCG1_MOUSE	Chgb	1	1	10000000	0.0323		sp|P18872|GNAO_MOUSE	Gnao1
	sp|Q7TQF7|AMPH_MOUSE	Amph	11	29	4500000	0.0267			sp|Q9Z218|DPP6_MOUSE	Dpp6	13	48	30000000	0.0755			sp|Q60864|STIP1_MOUSE	Stip1	13	17	4700000	0.0185			sp|Q91WB7|UBTD1_MOUSE	Ubtd1	1	1	310000	0.000597			sp|Q8BRJ3|RELL2_MOUSE	Rell2	1	1	50000	0.000116			sp|Q9D6J5|NDUB8_MOUSE	Ndufb8	1	1	310000	0.000979		sp|P97792|CXAR_MOUSE	Cxadr
	sp|Q9JKK7|TMOD2_MOUSE	Tmod2	11	22	5300000	0.0312			sp|P18242|CATD_MOUSE	Ctsd	13	40	150000000	0.39			sp|P70704|AT8A1_MOUSE	Atp8a1	13	16	3200000	0.0126			sp|Q9CYS6|CB072_MOUSE		1	1	87000	0.000166			sp|Q8R1J9|TOR2A_MOUSE	Tor2a	1	1	14000	3.15e-05			sp|Q00560|IL6RB_MOUSE	Il6st	1	1	110000	0.000337		sp|Q9CWZ7|SNAG_MOUSE	Napg
	sp|Q8R1Q8|DC1L1_MOUSE	Dync1li1	11	22	4400000	0.0259			sp|P08249|MDHM_MOUSE	Mdh2	13	29	54000000	0.14			sp|Q64487|PTPRD_MOUSE	Ptprd	13	13	1400000	0.00565			sp|Q99JH8|ERD21_MOUSE	Kdelr1	1	1	660000	0.00125			sp|Q8VCV1|AB17C_MOUSE	Abhd17c	1	1	180000	0.000409			sp|Q6NXH2|MANEA_MOUSE	Manea	1	1	59000	0.000188		sp|P09103|PDIA1_MOUSE	P4hb
	sp|Q8K400|STXB5_MOUSE	Stxbp5	11	18	2600000	0.0152			sp|Q9WTR5|CAD13_MOUSE	Cdh13	13	26	47000000	0.12			sp|Q91XV3|BASP1_MOUSE	Basp1	12	126	210000000	0.82			tr|F8WI30|F8WI30_MOUSE	Snx7	1	1	310000	0.000593			sp|O70340|NPTX2_MOUSE	Nptx2	1	1	77000	0.000179			sp|Q9DCD0|6PGD_MOUSE	Pgd	1	1	51000	0.000164		sp|Q91YQ5|RPN1_MOUSE	Rpn1
	sp|Q02819|NUCB1_MOUSE	Nucb1	11	17	1600000	0.00959			sp|Q7TQF7|AMPH_MOUSE	Amph	13	25	11000000	0.0272			sp|Q8K0T0|RTN1_MOUSE	Rtn1	12	36	19000000	0.0772			sp|Q9ESN4|C1QL3_MOUSE	C1ql3	1	1	150000	0.000285			tr|A2AR26|A2AR26_MOUSE	Slc2a6	1	1	300000	0.000691			sp|Q8K353|CYTM1_MOUSE	Cystm1	1	1	170000	0.000534		sp|Q80VP0|TCPR1_MOUSE	Tecpr1
	sp|Q9D051|ODPB_MOUSE	Pdhb	11	16	5000000	0.0293			sp|Q91YQ5|RPN1_MOUSE	Rpn1	13	20	6800000	0.017			sp|P08249|MDHM_MOUSE	Mdh2	12	24	26000000	0.1			sp|Q8VCV1|AB17C_MOUSE	Abhd17c	1	1	190000	0.000368			sp|Q9D291|DESI2_MOUSE	Desi2	1	1	97000	0.000224			sp|Q61543|GSLG1_MOUSE	Glg1	1	1	130000	0.000405		sp|Q9Z1L5|CA2D3_MOUSE	Cacna2d3
	sp|Q80UG2|PLXA4_MOUSE	Plxna4	11	15	4800000	0.0284			sp|Q61490|CD166_MOUSE	Alcam	13	18	12000000	0.0301			sp|P07901|HS90A_MOUSE	Hsp90aa1	12	22	7200000	0.0286			sp|Q0GA42|CNNM1_MOUSE	Cnnm1	1	1	330000	0.000619			tr|Q0VF55|Q0VF55_MOUSE	Atp2b3	1	1	100000	0.000234			sp|P97490|ADCY8_MOUSE	Adcy8	1	1	59000	0.00019		sp|Q8CIN4|PAK2_MOUSE	Pak2
	sp|Q9WU78|PDC6I_MOUSE	Pdcd6ip	11	15	2500000	0.0147			sp|P27612|PLAP_MOUSE	Plaa	13	17	4800000	0.012			sp|Q6Q477|AT2B4_MOUSE	Atp2b4	12	19	21000000	0.0847			sp|Q8CH36|S36A4_MOUSE	Slc36a4	1	1	490000	0.000938			sp|Q80TF3|PCD19_MOUSE	Pcdh19	1	1	210000	0.000496			sp|Q3TFQ1|SPRY7_MOUSE	Spryd7	1	1	930000	0.00296		sp|Q62277|SYPH_MOUSE	Syp
	sp|Q3UHJ0|AAK1_MOUSE	Aak1	11	13	960000	0.00565			sp|Q6PIE5|AT1A2_MOUSE	Atp1a2	13	17	75000000	0.19			sp|D3Z7P3|GLSK_MOUSE	Gls	12	17	3200000	0.0128			sp|Q9JM63|KCJ10_MOUSE	Kcnj10	1	1	160000	0.000305			sp|P59481|LMA2L_MOUSE	Lman2l	1	1	100000	0.000233			sp|Q8BFR4|GNS_MOUSE	Gns	1	1	46000	0.000147		sp|P60879|SNP25_MOUSE	Snap25
	sp|Q80TJ1|CAPS1_MOUSE	Cadps	11	12	860000	0.00508			sp|Q99P72|RTN4_MOUSE	Rtn4	13	16	3600000	0.009			sp|Q02819|NUCB1_MOUSE	Nucb1	12	16	2100000	0.00829			sp|Q99PH1|LRRC4_MOUSE	Lrrc4	1	1	150000	0.000285			sp|Q9Z2U1|PSA5_MOUSE	Psma5	1	1	190000	0.000429			tr|B0LAC8|B0LAC8_MOUSE	Atp6v1b2	1	1	81000	0.000257		sp|O08917|FLOT1_MOUSE	Flot1
	sp|Q61879|MYH10_MOUSE	Myh10	11	11	820000	0.00485			sp|Q9Z0H8|CLIP2_MOUSE	Clip2	13	15	3800000	0.00945			sp|Q9D051|ODPB_MOUSE	Pdhb	12	14	4500000	0.018			sp|Q9D6M3|GHC1_MOUSE	Slc25a22	1	1	160000	0.000298			sp|Q9D0I4|STX17_MOUSE	Stx17	1	1	120000	0.000283			sp|Q9DA75|NLS1_MOUSE	Mfsd2a	1	1	60000	0.000192		sp|P27612|PLAP_MOUSE	Plaa
	sp|O55042|SYUA_MOUSE	Snca	10	257	2200000000	13			sp|P16056|MET_MOUSE	Met	13	14	2800000	0.00692			sp|Q6PB44|PTN23_MOUSE	Ptpn23	12	13	1700000	0.00687			sp|Q9EPL2|CSTN1_MOUSE	Clstn1	1	1	180000	0.000336			sp|Q60963|PAFA_MOUSE	Pla2g7	1	1	240000	0.000558			sp|P34914|HYES_MOUSE	Ephx2	1	1	66000	0.00021		sp|O35927|CTND2_MOUSE	Ctnnd2
	sp|P18242|CATD_MOUSE	Ctsd	10	47	62000000	0.37			sp|O55042|SYUA_MOUSE	Snca	12	161	3900000000	9.71			sp|Q91XM9|DLG2_MOUSE	Dlg2	12	12	3100000	0.0121			sp|Q91VX9|TM168_MOUSE	Tmem168	1	1	110000	0.000207			tr|E9Q3Q6|E9Q3Q6_MOUSE	Alcam	1	1	270000	0.000626			sp|P03911|NU4M_MOUSE	Mtnd4	1	1	110000	0.000337		sp|Q6PB44|PTN23_MOUSE	Ptpn23
	sp|P63011|RAB3A_MOUSE	Rab3a	10	37	24000000	0.14			sp|P06837|NEUM_MOUSE	Gap43	12	138	180000000	0.46			sp|P06837|NEUM_MOUSE	Gap43	11	121	120000000	0.49			sp|Q9DCT5|SDF2_MOUSE	Sdf2	1	1	99000	0.000188			sp|Q0V8T9|CTP5A_MOUSE	Cntnap5a	1	1	76000	0.000176			sp|P97411|ICA69_MOUSE	Ica1	1	1	91000	0.00029		sp|P68369|TBA1A_MOUSE	Tuba1a
	sp|P46638|RB11B_MOUSE	Rab11b	10	37	18000000	0.11			sp|Q9CQW1|YKT6_MOUSE	Ykt6	12	38	66000000	0.17			sp|P26645|MARCS_MOUSE	Marcks	11	48	19000000	0.0768			sp|Q5I012|S38AA_MOUSE	Slc38a10	1	1	130000	0.000242			sp|P21956|MFGM_MOUSE	Mfge8	1	1	130000	0.000301			sp|Q3UVK0|ERMP1_MOUSE	Ermp1	1	1	29000	9.26e-05		sp|Q9JIS5|SV2A_MOUSE	Sv2a
	sp|P05202|AATM_MOUSE	Got2	10	29	16000000	0.0926			sp|Q60598|SRC8_MOUSE	Cttn	12	32	54000000	0.14			sp|Q9CQW2|ARL8B_MOUSE	Arl8b	11	40	54000000	0.22			sp|Q99JR1|SFXN1_MOUSE	Sfxn1	1	1	230000	0.000434			sp|Q8BI84|MIA3_MOUSE	Mia3	1	1	54000	0.000125			sp|O70318|E41L2_MOUSE	Epb41l2	1	1	100000	0.000334		sp|P16858|G3P_MOUSE	Gapdh
	sp|Q9Z218|DPP6_MOUSE	Dpp6	10	29	9300000	0.0552			sp|P07901|HS90A_MOUSE	Hsp90aa1	12	23	14000000	0.0362			sp|P43006|EAA2_MOUSE	Slc1a2	11	28	9200000	0.0365			sp|Q62132|PTPRR_MOUSE	Ptprr	1	1	1500000	0.00278			sp|Q9JM63|KCJ10_MOUSE	Kcnj10	1	1	180000	0.00041			tr|F7BAB2|F7BAB2_MOUSE	Tmem132b	1	1	89000	0.000285		sp|Q02819|NUCB1_MOUSE	Nucb1
	sp|Q9QZM0|UBQL2_MOUSE	Ubqln2	10	28	7300000	0.043			sp|Q8K596|NAC2_MOUSE	Slc8a2	12	20	13000000	0.0338			sp|P16858|G3P_MOUSE	Gapdh	11	24	40000000	0.16			sp|Q9R0Q7|TEBP_MOUSE	Ptges3	1	1	190000	0.000357			tr|A2AR27|A2AR27_MOUSE	Slc2a6	1	1	130000	0.000304			sp|Q9CXP8|GBG10_MOUSE	Gng10	1	1	280000	0.0009		sp|Q9ERB0|SNP29_MOUSE	Snap29
	sp|P17156|HSP72_MOUSE	Hspa2	10	28	41000000	0.24			sp|Q8R1Q8|DC1L1_MOUSE	Dync1li1	12	19	5100000	0.0129			sp|Q3UHL1|CAMKV_MOUSE	Camkv	11	21	5400000	0.0215			sp|Q8CIF6|SIDT2_MOUSE	Sidt2	1	1	220000	0.000411			sp|Q9CX56|PSMD8_MOUSE	Psmd8	1	1	26000	5.97e-05			sp|Q62010|OVGP1_MOUSE	Ovgp1	1	1	33000	0.000107		sp|Q8BJI1|S6A17_MOUSE	Slc6a17
	sp|Q9EPJ9|ARFG1_MOUSE	Arfgap1	10	20	5700000	0.0336			sp|Q9CZ13|QCR1_MOUSE	Uqcrc1	12	19	29000000	0.0736			sp|Q62433|NDRG1_MOUSE	Ndrg1	11	18	4200000	0.0165			sp|Q8K0B2|LMBD1_MOUSE	Lmbrd1	1	1	800000	0.00153			sp|Q99JR1|SFXN1_MOUSE	Sfxn1	1	1	120000	0.000285			sp|P03921|NU5M_MOUSE	Mtnd5	1	1	95000	0.000302		sp|Q8K596|NAC2_MOUSE	Slc8a2
	sp|P31324|KAP3_MOUSE	Prkar2b	10	20	6200000	0.0366			sp|Q80VP0|TCPR1_MOUSE	Tecpr1	12	15	4100000	0.0103			sp|Q7TQF7|AMPH_MOUSE	Amph	11	18	3500000	0.0139			tr|Q8BR30|Q8BR30_MOUSE	Rufy2	1	1	78000	0.000148			sp|Q99K24|S39A3_MOUSE	Slc39a3	1	1	33000	7.73e-05			tr|A2AR27|A2AR27_MOUSE	Slc2a6	1	1	98000	0.000312		sp|Q8R1Q8|DC1L1_MOUSE	Dync1li1
	sp|Q9CZ44|NSF1C_MOUSE	Nsfl1c	10	19	4300000	0.0253			sp|Q9DBG6|RPN2_MOUSE	Rpn2	12	14	4000000	0.00998			sp|Q9DCX2|ATP5H_MOUSE	Atp5h	11	16	9600000	0.0382			sp|Q8BLC3|LYPD1_MOUSE	Lypd1	1	1	730000	0.00139			sp|Q06138|CAB39_MOUSE	Cab39	1	1	130000	0.000307			sp|P12657|ACM1_MOUSE	Chrm1	1	1	64000	0.000203		sp|Q69ZK9|NLGN2_MOUSE	Nlgn2
	sp|Q922R8|PDIA6_MOUSE	Pdia6	10	18	7500000	0.0441			sp|Q02053|UBA1_MOUSE	Uba1	12	14	2900000	0.00723			sp|Q8K596|NAC2_MOUSE	Slc8a2	11	16	4500000	0.0176			sp|Q9Z0V2|KCND2_MOUSE	Kcnd2	1	1	75000	0.000142			sp|Q924X6|LRP8_MOUSE	Lrp8	1	1	110000	0.000262			sp|O35855|BCAT2_MOUSE	Bcat2	1	1	54000	0.000172		sp|P08003|PDIA4_MOUSE	Pdia4
	sp|Q91YQ5|RPN1_MOUSE	Rpn1	10	18	2900000	0.0173			sp|P80314|TCPB_MOUSE	Cct2	12	14	4700000	0.0118			sp|Q9Z0R4|ITSN1_MOUSE	Itsn1	11	15	3200000	0.0126			sp|Q9JJV4|CCG4_MOUSE	Cacng4	1	1	91000	0.000172			tr|B2RQ71|B2RQ71_MOUSE	Dip2c	1	1	140000	0.000326			sp|O88697|STK16_MOUSE	Stk16	1	1	120000	0.000368		tr|A1L3P4|A1L3P4_MOUSE	Slc9a6
	sp|Q9R0K7|AT2B2_MOUSE	Atp2b2	10	17	7200000	0.0424			sp|P70704|AT8A1_MOUSE	Atp8a1	12	13	3500000	0.00883			sp|Q04447|KCRB_MOUSE	Ckb	11	15	4100000	0.0161			sp|Q8JZS0|LIN7A_MOUSE	Lin7a	1	1	110000	0.000218			sp|Q9ESW4|AGK_MOUSE	Agk	1	1	79000	0.000183			tr|E9PY62|E9PY62_MOUSE	Cntnap3	1	1	60000	0.00019		sp|Q9EQH3|VPS35_MOUSE	Vps35
	sp|P09103|PDIA1_MOUSE	P4hb	10	17	2000000	0.0116			sp|Q9EPN1|NBEA_MOUSE	Nbea	12	13	1500000	0.00379			sp|Q8BH66|ATLA1_MOUSE	Atl1	11	13	2500000	0.00992			sp|P35290|RAB24_MOUSE	Rab24	1	1	160000	0.000314			sp|Q64520|KGUA_MOUSE	Guk1	1	1	150000	0.000346			sp|P98200|AT8A2_MOUSE	Atp8a2	1	1	110000	0.000366		sp|P26443|DHE3_MOUSE	Glud1
	sp|O08917|FLOT1_MOUSE	Flot1	10	15	1200000	0.00703			sp|O35136|NCAM2_MOUSE	Ncam2	12	13	5500000	0.0138			sp|Q9DCN2|NB5R3_MOUSE	Cyb5r3	11	13	5900000	0.0233			sp|Q8JZK9|HMCS1_MOUSE	Hmgcs1	1	1	190000	0.000362			tr|A3KGR9|A3KGR9_MOUSE	H13	1	1	310000	0.000711			sp|Q99J27|ACATN_MOUSE	Slc33a1	1	1	24000	7.8e-05		sp|Q6NXK7|DPP10_MOUSE	Dpp10
	sp|P08003|PDIA4_MOUSE	Pdia4	10	14	1400000	0.00829			sp|P26645|MARCS_MOUSE	Marcks	11	48	45000000	0.11			sp|Q8BJI1|S6A17_MOUSE	Slc6a17	11	13	2400000	0.00964			tr|E9PY62|E9PY62_MOUSE	Cntnap3	1	1	150000	0.000292			sp|P12657|ACM1_MOUSE	Chrm1	1	1	150000	0.000345			sp|Q924X6|LRP8_MOUSE	Lrp8	1	1	94000	0.000299		sp|P80314|TCPB_MOUSE	Cct2
	sp|Q8K1M6|DNM1L_MOUSE	Dnm1l	10	13	1200000	0.00696			sp|Q9CQW2|ARL8B_MOUSE	Arl8b	11	42	74000000	0.19			sp|Q6NXK7|DPP10_MOUSE	Dpp10	11	13	3000000	0.0117			sp|O70309|ITB5_MOUSE	Itgb5	1	1	210000	0.000407			sp|Q61543|GSLG1_MOUSE	Glg1	1	1	210000	0.000481			sp|Q9Z2W8|GRIA4_MOUSE	Gria4	1	1	110000	0.000359		sp|P50396|GDIA_MOUSE	Gdi1
	sp|P14733|LMNB1_MOUSE	Lmnb1	10	12	960000	0.0057			sp|Q8BGZ1|HPCL4_MOUSE	Hpcal4	11	28	31000000	0.077			sp|P80314|TCPB_MOUSE	Cct2	11	12	2800000	0.011			sp|Q3UHR0|BAHC1_MOUSE	Bahcc1	1	1	160000	0.000308			sp|O35083|PLCA_MOUSE	Agpat1	1	1	24000	5.46e-05			sp|Q9D0A3|ARPIN_MOUSE	Arpin	1	1	1300000	0.00409		sp|Q6ZQ38|CAND1_MOUSE	Cand1
	sp|P80314|TCPB_MOUSE	Cct2	10	12	1200000	0.007			sp|Q62433|NDRG1_MOUSE	Ndrg1	11	22	15000000	0.0365			sp|Q810U3|NFASC_MOUSE	Nfasc	11	11	3100000	0.0123			sp|O08912|GALT1_MOUSE	Galnt1	1	1	190000	0.000364			sp|P98200|AT8A2_MOUSE	Atp8a2	1	1	130000	0.000297			sp|O55013|TPPC3_MOUSE	Trappc3	1	1	74000	0.000235		sp|P43406|ITAV_MOUSE	Itgav
	sp|Q9EQH3|VPS35_MOUSE	Vps35	10	11	890000	0.00525			sp|Q9DCL9|PUR6_MOUSE	Paics	11	21	19000000	0.0477			sp|P70232|NCHL1_MOUSE	Chl1	11	11	2500000	0.00998			sp|Q7M759|AB17B_MOUSE	Abhd17b	1	1	600000	0.00114			tr|D3Z3Y1|D3Z3Y1_MOUSE	Pigg	1	1	91000	0.000211			sp|Q8BG50|TM169_MOUSE	Tmem169	1	1	100000	0.000326		sp|P06837|NEUM_MOUSE	Gap43
	sp|Q02053|UBA1_MOUSE	Uba1	10	11	930000	0.00552			sp|Q99J85|NPTXR_MOUSE	Nptxr	11	18	11000000	0.0264			sp|P24270|CATA_MOUSE	Cat	11	11	1900000	0.00768			tr|Q0VF55|Q0VF55_MOUSE	Atp2b3	1	1	170000	0.000318			sp|Q8K353|CYTM1_MOUSE	Cystm1	1	1	320000	0.000736			sp|Q8R1I1|QCR9_MOUSE	Uqcr10	1	1	170000	0.000531		sp|Q60598|SRC8_MOUSE	Cttn
	sp|Q9CQW2|ARL8B_MOUSE	Arl8b	9	38	47000000	0.28			sp|Q9DCX2|ATP5H_MOUSE	Atp5h	11	17	11000000	0.0279			sp|Q9D8Y0|EFHD2_MOUSE	Efhd2	11	11	3800000	0.0151			tr|A2J1C8|A2J1C8_MOUSE		1	1	32000	6.09e-05			tr|G3X928|G3X928_MOUSE	Sec23ip	1	1	90000	0.000207			tr|A0A0B4J1J2|A0A0B4J1J2_MOUSE	Igkv5-43	1	1	72000	0.00023		sp|P51863|VA0D1_MOUSE	Atp6v0d1
	sp|P62821|RAB1A_MOUSE	Rab1A	9	23	9000000	0.0531			sp|P05202|AATM_MOUSE	Got2	11	16	25000000	0.0641			sp|P97300|NPTN_MOUSE	Nptn	10	28	76000000	0.3			sp|Q9R0A0|PEX14_MOUSE	Pex14	1	1	66000	0.000125			sp|Q9ES56|TPPC4_MOUSE	Trappc4	1	1	130000	0.000293			sp|Q5FWK3|RHG01_MOUSE	Arhgap1	1	1	120000	0.000369		sp|Q9D051|ODPB_MOUSE	Pdhb
	sp|P16858|G3P_MOUSE	Gapdh	9	22	22000000	0.13			sp|Q6NXK7|DPP10_MOUSE	Dpp10	11	15	7400000	0.0187			sp|P63011|RAB3A_MOUSE	Rab3a	10	26	32000000	0.13			sp|Q8C0Z1|F234A_MOUSE	Fam234a	1	1	130000	0.000239			sp|Q9JMF7|DOPP1_MOUSE	Dolpp1	1	1	21000	4.87e-05			sp|Q8K2L8|TPC12_MOUSE	Trappc12	1	1	93000	0.000298		sp|P97807|FUMH_MOUSE	Fh
	sp|Q8K2K6|AGFG1_MOUSE	Agfg1	9	21	8800000	0.0517			sp|P51150|RAB7A_MOUSE	Rab7a	11	14	11000000	0.0285			sp|Q9EPJ9|ARFG1_MOUSE	Arfgap1	10	23	15000000	0.061			sp|O35083|PLCA_MOUSE	Agpat1	1	1	36000	6.76e-05			sp|Q8CH36|S36A4_MOUSE	Slc36a4	1	1	410000	0.000935			sp|Q9Z2L6|MINP1_MOUSE	Minpp1	1	1	100000	0.000321		sp|Q8BH66|ATLA1_MOUSE	Atl1
	sp|P0DP27|CALM2_MOUSE	Calm2	9	20	12000000	0.0708			sp|Q8CIN4|PAK2_MOUSE	Pak2	11	14	6400000	0.0161			sp|Q9WTR5|CAD13_MOUSE	Cdh13	10	18	19000000	0.0744			sp|Q9CRB8|MTFP1_MOUSE	Mtfp1	1	1	140000	0.000264			sp|P0DN34|NDUB1_MOUSE	Ndufb1	1	1	200000	0.00046			tr|E9Q9T0|E9Q9T0_MOUSE	Fbrsl1	1	1	77000	0.000246		sp|Q9Z2I9|SUCB1_MOUSE	Sucla2
	sp|Q9DB05|SNAA_MOUSE	Napa	9	19	4300000	0.0255			sp|Q9Z2I9|SUCB1_MOUSE	Sucla2	11	13	4200000	0.0106			sp|Q9CZ44|NSF1C_MOUSE	Nsfl1c	10	17	5500000	0.0218			sp|Q8BHH9|T179A_MOUSE	Tmem179	1	1	410000	0.000777			sp|Q9CXJ4|ABCB8_MOUSE	Abcb8	1	1	73000	0.000168			tr|Q0VF55|Q0VF55_MOUSE	Atp2b3	1	1	65000	0.000208		sp|P54763|EPHB2_MOUSE	Ephb2
	sp|P48453|PP2BB_MOUSE	Ppp3cb	9	19	9700000	0.0572			tr|Q8CFX3|Q8CFX3_MOUSE	Pcdh1	11	13	2800000	0.00694			sp|Q8BNY6|NCS1_MOUSE	Ncs1	10	17	17000000	0.0674			sp|Q9Z0S9|PRAF1_MOUSE	Rabac1	1	1	300000	0.000576			sp|Q8VE85|PLD3A_MOUSE	Prelid3a	1	1	77000	0.000178			sp|Q62314|TGON2_MOUSE	Tgoln2	1	1	230000	0.000747		sp|Q8BYI8|F234B_MOUSE	Fam234b
	sp|P51150|RAB7A_MOUSE	Rab7a	9	16	6000000	0.0357			sp|Q8BH66|ATLA1_MOUSE	Atl1	11	12	4700000	0.0118			sp|Q9JKF6|NECT1_MOUSE	Nectin1	10	16	3100000	0.0122			sp|Q64514|TPP2_MOUSE	Tpp2	1	1	80000	0.000151			sp|Q9CXP8|GBG10_MOUSE	Gng10	1	1	510000	0.00118			sp|Q9CXT8|MPPB_MOUSE	Pmpcb	1	1	180000	0.00056		sp|Q9CS84|NRX1A_MOUSE	Nrxn1
	sp|Q3UHL1|CAMKV_MOUSE	Camkv	9	16	4100000	0.0244			sp|O08917|FLOT1_MOUSE	Flot1	11	12	2800000	0.00698			sp|Q7TN29|SMAP2_MOUSE	Smap2	10	16	9100000	0.036			sp|Q80TL0|PPM1E_MOUSE	Ppm1e	1	1	170000	0.000316			sp|Q8BXL7|ARFRP_MOUSE	Arfrp1	1	1	130000	0.000295			tr|E9PWW9|E9PWW9_MOUSE	Rsf1	1	1	5100000	0.0164		sp|Q3UPL0|SC31A_MOUSE	Sec31a
	sp|Q9DCN2|NB5R3_MOUSE	Cyb5r3	9	15	4800000	0.0284			sp|Q91XM9|DLG2_MOUSE	Dlg2	11	12	5400000	0.0136			sp|Q6PIE5|AT1A2_MOUSE	Atp1a2	10	15	44000000	0.18			sp|P60764|RAC3_MOUSE	Rac3	1	1	630000	0.00119			sp|Q78ZA7|NP1L4_MOUSE	Nap1l4	1	1	70000	0.000161			sp|Q9D061|ACBD6_MOUSE	Acbd6	1	1	39000	0.000124		sp|Q7TSK3|PCDH8_MOUSE	Pcdh8
	sp|P97807|FUMH_MOUSE	Fh	9	13	1100000	0.00629			sp|Q9JIS5|SV2A_MOUSE	Sv2a	10	38	38000000	0.0955			sp|Q9JKK7|TMOD2_MOUSE	Tmod2	10	14	10000000	0.0404			sp|Q61200|NXPH1_MOUSE	Nxph1	1	1	110000	0.000216			sp|Q8CIF6|SIDT2_MOUSE	Sidt2	1	1	160000	0.00038			sp|Q62468|VILI_MOUSE	Vil1	1	1	720000	0.00231		sp|P97467|AMD_MOUSE	Pam
	sp|Q9Z2I9|SUCB1_MOUSE	Sucla2	9	13	1500000	0.00862			sp|P63101|1433Z_MOUSE	Ywhaz	10	34	200000000	0.5			sp|Q8BG39|SV2B_MOUSE	Sv2b	10	14	4400000	0.0174			sp|Q9DC70|NDUS7_MOUSE	Ndufs7	1	1	240000	0.000456			sp|Q9CR62|M2OM_MOUSE	Slc25a11	1	1	150000	0.000341			sp|Q9JMF7|DOPP1_MOUSE	Dolpp1	1	1	29000	9.28e-05		sp|P19096|FAS_MOUSE	Fasn
	sp|P70704|AT8A1_MOUSE	Atp8a1	9	13	1800000	0.0109			sp|P43006|EAA2_MOUSE	Slc1a2	10	31	15000000	0.0379			sp|P17182|ENOA_MOUSE	Eno1	10	14	4700000	0.0187			sp|Q9JMF7|DOPP1_MOUSE	Dolpp1	1	1	27000	5.16e-05			sp|Q91W52|TMM19_MOUSE	Tmem19	1	1	260000	0.000601			sp|P53986|MOT1_MOUSE	Slc16a1	1	1	330000	0.00105		sp|P84084|ARF5_MOUSE	Arf5
	sp|O88935|SYN1_MOUSE	Syn1	9	12	960000	0.00567			sp|Q9EPJ9|ARFG1_MOUSE	Arfgap1	10	27	25000000	0.064			sp|P97807|FUMH_MOUSE	Fh	10	13	3100000	0.0122			tr|E9PWG2|E9PWG2_MOUSE	Trappc8	1	1	98000	0.000187			sp|P80313|TCPH_MOUSE	Cct7	1	1	74000	0.00017			sp|Q9DC61|MPPA_MOUSE	Pmpca	1	1	110000	0.000336		sp|Q9CWF2|TBB2B_MOUSE	Tubb2b
	sp|P50396|GDIA_MOUSE	Gdi1	9	10	790000	0.00469			sp|P63011|RAB3A_MOUSE	Rab3a	10	25	46000000	0.12			sp|Q9Z1G3|VATC1_MOUSE	Atp6v1c1	10	13	7600000	0.0303			tr|G5CPP0|G5CPP0_MOUSE	Calr4	1	1	150000	0.000287			sp|Q60751|IGF1R_MOUSE	Igf1r	1	1	100000	0.000241			sp|Q3TWL2|TM55B_MOUSE	Tmem55b	1	1	140000	0.000458		sp|P18242|CATD_MOUSE	Ctsd
	sp|Q8VBZ3|CLPT1_MOUSE	Clptm1	9	10	2300000	0.0135			sp|P62259|1433E_MOUSE	Ywhae	10	23	25000000	0.0623			sp|P05202|AATM_MOUSE	Got2	10	13	19000000	0.0744			tr|F7BAB2|F7BAB2_MOUSE	Tmem132b	1	1	440000	0.000836			sp|Q923T9|KCC2G_MOUSE	Camk2g	1	1	280000	0.000637			sp|P60487|PLPP_MOUSE	Pdxp	1	1	1600000	0.00514		sp|Q8BG39|SV2B_MOUSE	Sv2b
	sp|Q8BLK3|LSAMP_MOUSE	Lsamp	8	39	48000000	0.29			sp|Q9QZM0|UBQL2_MOUSE	Ubqln2	10	22	38000000	0.095			sp|Q8JZP2|SYN3_MOUSE	Syn3	10	12	3600000	0.0142			sp|Q06138|CAB39_MOUSE	Cab39	1	1	170000	0.000323			sp|Q8BGK6|YLAT2_MOUSE	Slc7a6	1	1	34000	7.75e-05			sp|P13864|DNMT1_MOUSE	Dnmt1	1	1	83000	0.000266		sp|Q8BGZ1|HPCL4_MOUSE	Hpcal4
	sp|Q9WTR5|CAD13_MOUSE	Cdh13	8	33	10000000	0.0595			sp|P16858|G3P_MOUSE	Gapdh	10	21	39000000	0.0992			sp|P26443|DHE3_MOUSE	Glud1	10	12	3100000	0.0123			sp|Q3TWL2|TM55B_MOUSE	Tmem55b	1	1	410000	0.000771			sp|P16301|LCAT_MOUSE	Lcat	1	1	150000	0.000341			tr|E9PW38|E9PW38_MOUSE	Mctp1	1	1	590000	0.00189		sp|P62259|1433E_MOUSE	Ywhae
	sp|O55022|PGRC1_MOUSE	Pgrmc1	8	29	25000000	0.15			sp|Q9JKF6|NECT1_MOUSE	Nectin1	10	18	5900000	0.0148			sp|Q9CX34|SGT1_MOUSE	Sugt1	10	11	2600000	0.0103			sp|P97490|ADCY8_MOUSE	Adcy8	1	1	210000	0.000393			sp|Q80TL0|PPM1E_MOUSE	Ppm1e	1	1	120000	0.000269			sp|P57080|UBP25_MOUSE	Usp25	1	1	190000	0.0006		sp|P31324|KAP3_MOUSE	Prkar2b
	sp|Q9DCX2|ATP5H_MOUSE	Atp5h	8	28	5500000	0.0323			sp|Q7TN29|SMAP2_MOUSE	Smap2	10	18	21000000	0.0538			sp|P50396|GDIA_MOUSE	Gdi1	10	11	2300000	0.00905			sp|Q8C407|YIPF4_MOUSE	Yipf4	1	1	450000	0.000856			sp|Q6ZWQ7|SPCS3_MOUSE	Spcs3	1	1	120000	0.000288			sp|Q9CRT8|XPOT_MOUSE	Xpot	1	1	220000	0.000717		sp|Q9WTR5|CAD13_MOUSE	Cdh13
	sp|Q9DCL9|PUR6_MOUSE	Paics	8	20	8800000	0.0518			sp|Q8BG39|SV2B_MOUSE	Sv2b	10	15	9600000	0.0241			sp|Q8R317|UBQL1_MOUSE	Ubqln1	10	10	4500000	0.0179			sp|Q6NXM3|TM130_MOUSE	Tmem130	1	1	92000	0.000175			tr|E9PY62|E9PY62_MOUSE	Cntnap3	1	1	78000	0.000179			sp|P55088|AQP4_MOUSE	Aqp4	1	1	1100000	0.0034		sp|Q9D6R2|IDH3A_MOUSE	Idh3a
	sp|Q9Z1N5|DX39B_MOUSE	Ddx39b	8	19	3700000	0.0219			sp|Q8R317|UBQL1_MOUSE	Ubqln1	10	13	7700000	0.0194			sp|Q60634|FLOT2_MOUSE	Flot2	10	10	2900000	0.0114			sp|Q3TY60|F131B_MOUSE	Fam131b	1	1	150000	0.000293			sp|Q61220|NELL2_MOUSE	Nell2	1	1	280000	0.000644			sp|Q9JHI5|IVD_MOUSE	Ivd	1	1	210000	0.000663		sp|Q99JP7|GGT7_MOUSE	Ggt7
	sp|Q9D6R2|IDH3A_MOUSE	Idh3a	8	19	6600000	0.0389			sp|Q9DBG3|AP2B1_MOUSE	Ap2b1	10	13	1900000	0.0048			sp|Q9Z1L5|CA2D3_MOUSE	Cacna2d3	10	10	2000000	0.00799			sp|Q9DC29|ABCB6_MOUSE	Abcb6	1	1	160000	0.000301			sp|Q3V1U8|ELMD1_MOUSE	Elmod1	1	1	90000	0.000207			sp|Q61418|CLCN4_MOUSE	Clcn4	1	1	170000	0.000548		sp|Q7TQF7|AMPH_MOUSE	Amph
	sp|O35874|SATT_MOUSE	Slc1a4	8	18	11000000	0.0624			sp|P48453|PP2BB_MOUSE	Ppp3cb	10	13	17000000	0.0426			sp|Q69ZK9|NLGN2_MOUSE	Nlgn2	10	10	2600000	0.0105			sp|P11881|ITPR1_MOUSE	Itpr1	1	1	220000	0.000411			sp|Q61200|NXPH1_MOUSE	Nxph1	1	1	110000	0.000247			tr|D3Z4J2|D3Z4J2_MOUSE	Katnal2	1	1	500000	0.00161		sp|P05202|AATM_MOUSE	Got2
	sp|Q9DB20|ATPO_MOUSE	Atp5o	8	18	7800000	0.046			sp|Q6PHU5|SORT_MOUSE	Sort1	10	13	5800000	0.0147			sp|Q9Z0H8|CLIP2_MOUSE	Clip2	10	10	2400000	0.00941			sp|Q9DC61|MPPA_MOUSE	Pmpca	1	1	150000	0.000277			tr|F7BAB2|F7BAB2_MOUSE	Tmem132b	1	1	150000	0.000346			sp|P16301|LCAT_MOUSE	Lcat	1	1	62000	0.000198		sp|P37040|NCPR_MOUSE	Por
	sp|Q91VR2|ATPG_MOUSE	Atp5c1	8	18	6500000	0.0385			sp|Q9DCN2|NB5R3_MOUSE	Cyb5r3	10	12	7600000	0.019			sp|P97384|ANX11_MOUSE	Anxa11	10	10	2800000	0.0112			sp|Q91W52|TMM19_MOUSE	Tmem19	1	1	210000	0.000394			sp|Q9CZB0|C560_MOUSE	Sdhc	1	1	130000	0.000299			tr|Q9D6X2|Q9D6X2_MOUSE	Prdx5	1	1	1200000	0.0039		sp|Q9JKK7|TMOD2_MOUSE	Tmod2
	sp|P63328|PP2BA_MOUSE	Ppp3ca	8	17	12000000	0.0716			sp|Q8K0U4|HS12A_MOUSE	Hspa12a	10	12	6600000	0.0167			sp|Q9DC07|LNEBL_MOUSE	Nebl	10	10	3100000	0.0122			sp|Q9WTP2|SPY4_MOUSE	Spry4	1	1	200000	0.000387			sp|Q9D8V0|HM13_MOUSE	Hm13	1	1	180000	0.000418			sp|Q9D0M5|DYL2_MOUSE	Dynll2	1	1	500000	0.00159		sp|Q9DBG6|RPN2_MOUSE	Rpn2
	sp|Q9D1D4|TMEDA_MOUSE	Tmed10	8	16	3400000	0.0202			sp|P08003|PDIA4_MOUSE	Pdia4	10	12	5100000	0.0128			sp|Q6ZQ38|CAND1_MOUSE	Cand1	10	10	1500000	0.00581			sp|Q62314|TGON2_MOUSE	Tgoln2	1	1	340000	0.000652			sp|P17809|GTR1_MOUSE	Slc2a1	1	1	86000	0.000199			sp|Q66JQ7|KNL1_MOUSE	Knl1	1	1	38000	0.000122		sp|Q02053|UBA1_MOUSE	Uba1
	sp|Q9JKF6|NECT1_MOUSE	Nectin1	8	13	1300000	0.0075			sp|P54763|EPHB2_MOUSE	Ephb2	10	12	4100000	0.0104			sp|P46096|SYT1_MOUSE	Syt1	10	10	1200000	0.00475			sp|Q6PB93|GALT2_MOUSE	Galnt2	1	1	170000	0.000315			sp|Q9CQE1|NPS3B_MOUSE	Nipsnap3b	1	1	240000	0.000557			sp|P51791|CLCN3_MOUSE	Clcn3	1	1	100000	0.000321		sp|Q8K400|STXB5_MOUSE	Stxbp5
	sp|P32037|GTR3_MOUSE	Slc2a3	8	13	2700000	0.0162			sp|Q8BTS4|NUP54_MOUSE	Nup54	10	11	5500000	0.0138			sp|O55042|SYUA_MOUSE	Snca	9	151	2200000000	8.72			sp|Q9EPL8|IPO7_MOUSE	Ipo7	1	1	100000	0.000199			sp|Q8R1Y2|CP045_MOUSE		1	1	260000	0.000605			sp|Q91ZX7|LRP1_MOUSE	Lrp1	57	90	59000000	0.19		sp|Q60864|STIP1_MOUSE	Stip1
	sp|Q3UYC0|PPM1H_MOUSE	Ppm1h	8	13	1200000	0.00712			sp|P14733|LMNB1_MOUSE	Lmnb1	10	11	1800000	0.00464			sp|P54227|STMN1_MOUSE	Stmn1	9	46	220000000	0.86			sp|P35283|RAB12_MOUSE	Rab12	1	1	190000	0.000365			sp|Q9WUD1|CHIP_MOUSE	Stub1	1	1	85000	0.000197			sp|P50516|VATA_MOUSE	Atp6v1a	44	104	260000000	0.83		sp|Q60634|FLOT2_MOUSE	Flot2
	sp|P70232|NCHL1_MOUSE	Chl1	8	13	1700000	0.0101			sp|P70175|DLG3_MOUSE	Dlg3	10	11	2200000	0.00553			sp|P31324|KAP3_MOUSE	Prkar2b	9	32	11000000	0.0429			sp|Q3TWN3|CNNM2_MOUSE	Cnnm2	1	1	130000	0.000248			sp|P05063|ALDOC_MOUSE	Aldoc	1	1	86000	0.000199			sp|P12960|CNTN1_MOUSE	Cntn1	43	113	130000000	0.43		sp|Q8BXZ1|TMX3_MOUSE	Tmx3
	sp|Q04447|KCRB_MOUSE	Ckb	8	12	24000000	0.14			sp|Q8VBZ3|CLPT1_MOUSE	Clptm1	10	11	4400000	0.0109			sp|Q9JIS5|SV2A_MOUSE	Sv2a	9	28	20000000	0.0795			sp|Q9D9E0|S22AH_MOUSE	Slc22a17	1	1	1100000	0.00202			sp|Q9D387|LAMP5_MOUSE	Lamp5	1	1	97000	0.000223			sp|P56480|ATPB_MOUSE	Atp5b	40	130	660000000	2.1		sp|P57780|ACTN4_MOUSE	Actn4
	sp|Q8BH66|ATLA1_MOUSE	Atl1	8	12	1100000	0.00648			sp|Q8BJI1|S6A17_MOUSE	Slc6a17	10	11	3300000	0.00827			sp|Q8BLK3|LSAMP_MOUSE	Lsamp	9	27	18000000	0.0726			sp|Q8VBX4|CLC4K_MOUSE	Cd207	1	1	280000	0.000529			sp|Q3TWL2|TM55B_MOUSE	Tmem55b	1	1	180000	0.000418			sp|P13595|NCAM1_MOUSE	Ncam1	37	175	300000000	0.97		sp|Q07113|MPRI_MOUSE	Igf2r
	sp|Q9JK48|SHLB1_MOUSE	Sh3glb1	8	12	4300000	0.0253			sp|Q8BLF1|NCEH1_MOUSE	Nceh1	10	11	5900000	0.0148			sp|P35803|GPM6B_MOUSE	Gpm6b	9	21	14000000	0.0563			sp|Q8VCF1|CANT1_MOUSE	Cant1	1	1	160000	0.000301			sp|O35239|PTN9_MOUSE	Ptpn9	1	1	12000	2.73e-05			sp|Q9EQF6|DPYL5_MOUSE	Dpysl5	36	184	1300000000	4.11		sp|P58281|OPA1_MOUSE	Opa1
	sp|Q60634|FLOT2_MOUSE	Flot2	8	12	1600000	0.0097			sp|Q9EQH3|VPS35_MOUSE	Vps35	10	11	1800000	0.00462			sp|Q9QZM0|UBQL2_MOUSE	Ubqln2	9	18	22000000	0.0862			tr|A2VDF5|A2VDF5_MOUSE	Gria3	1	1	540000	0.00103			sp|P97411|ICA69_MOUSE	Ica1	1	1	130000	0.000297			sp|O55143|AT2A2_MOUSE	Atp2a2	34	60	80000000	0.25		sp|Q60932|VDAC1_MOUSE	Vdac1
	sp|Q80U56|AVL9_MOUSE	Avl9	8	12	1500000	0.00874			sp|Q9CQQ7|AT5F1_MOUSE	Atp5f1	10	11	6100000	0.0153			sp|P46638|RB11B_MOUSE	Rab11b	9	18	20000000	0.0792			sp|O35544|EAA4_MOUSE	Slc1a6	1	1	310000	0.000593			sp|Q8BG09|T184B_MOUSE	Tmem184b	1	1	170000	0.000391			sp|P16546|SPTN1_MOUSE	Sptan1	34	37	7200000	0.0229		sp|P08249|MDHM_MOUSE	Mdh2
	sp|P53810|PIPNA_MOUSE	Pitpna	8	12	2400000	0.0144			sp|P23819|GRIA2_MOUSE	Gria2	10	10	1600000	0.00405			sp|O54734|OST48_MOUSE	Ddost	9	14	5500000	0.0216			sp|P63323|RS12_MOUSE	Rps12	1	1	290000	0.000556			sp|Q8R0W6|NFIP1_MOUSE	Ndfip1	1	1	72000	0.000167			sp|Q62351|TFR1_MOUSE	Tfrc	33	91	110000000	0.35		sp|P07901|HS90A_MOUSE	Hsp90aa1
	sp|Q9DBG3|AP2B1_MOUSE	Ap2b1	8	12	1300000	0.00783			sp|O35927|CTND2_MOUSE	Ctnnd2	10	10	9600000	0.0241			sp|P00405|COX2_MOUSE	Mtco2	9	14	10000000	0.0413			sp|Q8BG50|TM169_MOUSE	Tmem169	1	1	150000	0.000283			sp|Q8VHV1|BAALC_MOUSE	Baalc	1	1	140000	0.000327			sp|P20029|GRP78_MOUSE	Hspa5	32	114	370000000	1.18		sp|Q9DCL9|PUR6_MOUSE	Paics
	sp|Q6NXK7|DPP10_MOUSE	Dpp10	8	11	2500000	0.0145			sp|P97384|ANX11_MOUSE	Anxa11	10	10	3800000	0.00944			sp|Q9DB20|ATPO_MOUSE	Atp5o	9	14	8800000	0.035			sp|Q9QZB0|RGS17_MOUSE	Rgs17	1	1	230000	0.000435			sp|Q9Z2W0|DNPEP_MOUSE	Dnpep	1	1	72000	0.000167			sp|O89001|CBPD_MOUSE	Cpd	32	51	77000000	0.25		sp|Q99J85|NPTXR_MOUSE	Nptxr
	sp|Q80VP0|TCPR1_MOUSE	Tecpr1	8	10	630000	0.0037			sp|Q6ZQ38|CAND1_MOUSE	Cand1	10	10	2300000	0.00579			sp|P14733|LMNB1_MOUSE	Lmnb1	9	12	1500000	0.00611			sp|Q62179|SEM4B_MOUSE	Sema4b	1	1	66000	0.000125			sp|Q922K9|FRK_MOUSE	Frk	1	1	240000	0.000545			sp|Q68FD5|CLH1_MOUSE	Cltc	32	38	12000000	0.0394		sp|Q8K2B3|SDHA_MOUSE	Sdha
	sp|P27612|PLAP_MOUSE	Plaa	8	10	770000	0.00453			sp|Q8K2K6|AGFG1_MOUSE	Agfg1	9	23	28000000	0.0714			sp|P08003|PDIA4_MOUSE	Pdia4	9	12	3400000	0.0136			sp|P15208|INSR_MOUSE	Insr	1	1	180000	0.00034			sp|Q8BQU7|TMM74_MOUSE	Tmem74	1	1	100000	0.000238			sp|Q9Z1G4|VPP1_MOUSE	Atp6v0a1	31	148	850000000	2.71		sp|P50518|VATE1_MOUSE	Atp6v1e1
	sp|Q99P72|RTN4_MOUSE	Rtn4	8	10	1100000	0.00663			sp|Q9D6R2|IDH3A_MOUSE	Idh3a	9	21	23000000	0.0571			sp|Q8C0L0|TMX4_MOUSE	Tmx4	9	12	5500000	0.022			sp|P0DN34|NDUB1_MOUSE	Ndufb1	1	1	350000	0.000667			sp|P61080|UB2D1_MOUSE	Ube2d1	1	1	220000	0.000515			sp|P97427|DPYL1_MOUSE	Crmp1	30	128	1400000000	4.54		sp|Q61490|CD166_MOUSE	Alcam
	sp|Q91XL9|OSBL1_MOUSE	Osbpl1a	8	10	1100000	0.00631			sp|Q8BVE3|VATH_MOUSE	Atp6v1h	9	18	3500000	0.00888			sp|P37040|NCPR_MOUSE	Por	9	12	3000000	0.0119			sp|Q91W53|GOGA7_MOUSE	Golga7	1	1	170000	0.00033			tr|Q9JLI2|Q9JLI2_MOUSE	Col5a3	1	1	930000	0.00215			sp|Q61548|AP180_MOUSE	Snap91	30	118	430000000	1.38		sp|Q04447|KCRB_MOUSE	Ckb
	sp|P54728|RD23B_MOUSE	Rad23b	8	10	2900000	0.0173			sp|Q61792|LASP1_MOUSE	Lasp1	9	17	34000000	0.0852			sp|Q9CQQ7|AT5F1_MOUSE	Atp5f1	9	12	3300000	0.0129			sp|Q8BU14|SEC62_MOUSE	Sec62	1	1	240000	0.000465			sp|Q9CZP5|BCS1_MOUSE	Bcs1l	1	1	110000	0.000264			sp|Q91V14|S12A5_MOUSE	Slc12a5	30	57	57000000	0.18		sp|P63082|VATL_MOUSE	Atp6v0c
	sp|Q9DBG6|RPN2_MOUSE	Rpn2	8	9	800000	0.00472			sp|Q9DAM7|TM263_MOUSE	Tmem263	9	15	16000000	0.0391			sp|P48453|PP2BB_MOUSE	Ppp3cb	9	12	17000000	0.0683			sp|Q5U4E0|LHPL4_MOUSE	Lhfpl4	1	1	140000	0.000265			sp|Q61271|ACV1B_MOUSE	Acvr1b	1	1	150000	0.000339			sp|P08113|ENPL_MOUSE	Hsp90b1	30	48	75000000	0.24		sp|P14733|LMNB1_MOUSE	Lmnb1
	sp|Q61316|HSP74_MOUSE	Hspa4	8	9	720000	0.00423			sp|Q8BNY6|NCS1_MOUSE	Ncs1	9	15	14000000	0.0344			sp|P51150|RAB7A_MOUSE	Rab7a	9	11	9000000	0.0356			sp|Q61137|ASTN1_MOUSE	Astn1	1	1	25000	4.85e-05			sp|Q9QZC2|PLXC1_MOUSE	Plxnc1	1	1	96000	0.000223			sp|Q99KI0|ACON_MOUSE	Aco2	30	40	47000000	0.15		sp|Q8K0U4|HS12A_MOUSE	Hspa12a
	tr|Q80U83|Q80U83_MOUSE	Sec24c	8	9	640000	0.00376			sp|O08579|EMD_MOUSE	Emd	9	15	5700000	0.0144			sp|P61922|GABT_MOUSE	Abat	9	11	2500000	0.0099			sp|Q9CZB0|C560_MOUSE	Sdhc	1	1	130000	0.000254			tr|H3BJ05|H3BJ05_MOUSE	Efcab8	1	1	230000	0.000529			sp|Q62188|DPYL3_MOUSE	Dpysl3	29	128	1400000000	4.53		sp|Q8BTS4|NUP54_MOUSE	Nup54
	sp|P57780|ACTN4_MOUSE	Actn4	8	8	400000	0.00238			sp|Q6PDL0|DC1L2_MOUSE	Dync1li2	9	15	8500000	0.0212			sp|Q80VP0|TCPR1_MOUSE	Tecpr1	9	11	1200000	0.00481			tr|E9PW38|E9PW38_MOUSE	Mctp1	1	1	1600000	0.00299			sp|P21460|CYTC_MOUSE	Cst3	1	1	61000	0.000141			sp|O08532|CA2D1_MOUSE	Cacna2d1	29	49	77000000	0.25		tr|Q8CFX3|Q8CFX3_MOUSE	Pcdh1
	sp|Q8BHZ0|FA49A_MOUSE	Fam49a	8	8	10000000	0.0594			sp|Q4V9Z5|SE6L2_MOUSE	Sez6l2	9	14	7500000	0.0188			sp|Q6PDL0|DC1L2_MOUSE	Dync1li2	9	11	2400000	0.00949			sp|P80313|TCPH_MOUSE	Cct7	1	1	510000	0.00098			sp|Q03157|APLP1_MOUSE	Aplp1	1	1	150000	0.000353			sp|P46460|NSF_MOUSE	Nsf	29	49	31000000	0.0989		sp|Q8R570|SNP47_MOUSE	Snap47
	sp|Q8BSL7|ARF2_MOUSE	Arf2	7	73	180000000	1.04			sp|Q9DAW9|CNN3_MOUSE	Cnn3	9	14	6500000	0.0163			sp|Q8BXZ1|TMX3_MOUSE	Tmx3	9	10	1700000	0.00671			sp|Q922K9|FRK_MOUSE	Frk	1	1	420000	0.000808			sp|Q9CRB6|TPPP3_MOUSE	Tppp3	1	1	75000	0.000173			sp|Q9JKR6|HYOU1_MOUSE	Hyou1	29	39	18000000	0.0589		sp|Q00493|CBPE_MOUSE	Cpe
	sp|P63101|1433Z_MOUSE	Ywhaz	7	61	45000000	0.26			sp|Q9JKK7|TMOD2_MOUSE	Tmod2	9	13	7000000	0.0177			sp|Q9DBG6|RPN2_MOUSE	Rpn2	9	10	1800000	0.0073			sp|P60843|IF4A1_MOUSE	Eif4a1	1	1	110000	0.000215			sp|Q99KS2|NGRN_MOUSE	Ngrn	1	1	260000	0.000598			sp|O08553|DPYL2_MOUSE	Dpysl2	28	221	3700000000	11.66		sp|Q6P9K9|NRX3A_MOUSE	Nrxn3
	sp|P97300|NPTN_MOUSE	Nptn	7	40	140000000	0.83			sp|Q8R5M8|CADM1_MOUSE	Cadm1	9	13	16000000	0.0395			sp|Q9Z2I9|SUCB1_MOUSE	Sucla2	9	10	2600000	0.0103			sp|P56695|WFS1_MOUSE	Wfs1	1	1	220000	0.000418			sp|Q8R1F6|HID1_MOUSE	Hid1	1	1	550000	0.00127			sp|Q03265|ATPA_MOUSE	Atp5a1	27	96	430000000	1.36		sp|P97384|ANX11_MOUSE	Anxa11
	sp|P62748|HPCL1_MOUSE	Hpcal1	7	34	9200000	0.0542			sp|Q3UHL1|CAMKV_MOUSE	Camkv	9	13	8000000	0.02			sp|Q8K0U4|HS12A_MOUSE	Hspa12a	9	10	2700000	0.0106			tr|F6Y3V0|F6Y3V0_MOUSE	Ptprf	1	1	130000	0.000239			sp|Q62179|SEM4B_MOUSE	Sema4b	1	1	47000	0.00011			sp|P70704|AT8A1_MOUSE	Atp8a1	27	41	35000000	0.11		sp|P70175|DLG3_MOUSE	Dlg3
	sp|P61089|UBE2N_MOUSE	Ube2n	7	32	19000000	0.11			sp|P00405|COX2_MOUSE	Mtco2	9	13	12000000	0.0314			sp|Q8VBZ3|CLPT1_MOUSE	Clptm1	9	10	2600000	0.0103			sp|P49717|MCM4_MOUSE	Mcm4	1	1	240000	0.000457			sp|A2ASS6|TITIN_MOUSE	Ttn	1	1	190000	0.000444			sp|Q8VDN2|AT1A1_MOUSE	Atp1a1	26	85	320000000	1.02		sp|Q61699|HS105_MOUSE	Hsph1
	sp|Q8BNY6|NCS1_MOUSE	Ncs1	7	26	13000000	0.0779			sp|Q9DB20|ATPO_MOUSE	Atp5o	9	13	16000000	0.0397			sp|O88935|SYN1_MOUSE	Syn1	9	10	1500000	0.00594			sp|O88632|SEM3F_MOUSE	Sema3f	1	1	170000	0.000326			tr|A0A0R4J0V2|A0A0R4J0V2_MOUSE	Mpzl1	1	1	160000	0.000368			sp|O35098|DPYL4_MOUSE	Dpysl4	26	52	180000000	0.57		tr|Q80U83|Q80U83_MOUSE	Sec24c
	sp|Q60930|VDAC2_MOUSE	Vdac2	7	24	24000000	0.14			sp|Q9D8Y0|EFHD2_MOUSE	Efhd2	9	12	3800000	0.00944			sp|Q61490|CD166_MOUSE	Alcam	9	10	3900000	0.0155			sp|Q9CRB6|TPPP3_MOUSE	Tppp3	1	1	150000	0.00029			sp|Q8BFZ2|PLPR1_MOUSE	Plppr1	1	1	180000	0.000413			sp|P63038|CH60_MOUSE	Hspd1	26	50	42000000	0.14		sp|Q80XR2|AT2C1_MOUSE	Atp2c1
	sp|P51863|VA0D1_MOUSE	Atp6v0d1	7	21	12000000	0.0723			sp|Q8BK64|AHSA1_MOUSE	Ahsa1	9	12	11000000	0.027			sp|P53810|PIPNA_MOUSE	Pitpna	9	10	3600000	0.0142			sp|Q9Z1X2|PTSS2_MOUSE	Ptdss2	1	1	120000	0.000223			sp|Q8CHX7|RFTN2_MOUSE	Rftn2	1	1	87000	0.0002			sp|G5E829|AT2B1_MOUSE	Atp2b1	26	48	53000000	0.17		sp|Q8CAQ8|MIC60_MOUSE	Immt
	sp|Q9JIS5|SV2A_MOUSE	Sv2a	7	21	4800000	0.0282			sp|P37040|NCPR_MOUSE	Por	9	12	3800000	0.00951			sp|Q8R3V5|SHLB2_MOUSE	Sh3glb2	9	10	3200000	0.0127			tr|Q59IW6|Q59IW6_MOUSE	Abi3bp	1	1	490000	0.000929			sp|S4R1M9|OSB10_MOUSE	Osbpl10	1	1	130000	0.000292			sp|Q8BHN3|GANAB_MOUSE	Ganab	26	30	20000000	0.0653		sp|B0V2N1|PTPRS_MOUSE	Ptprs
	sp|Q8K2B3|SDHA_MOUSE	Sdha	7	19	5200000	0.0306			sp|P21278|GNA11_MOUSE	Gna11	9	12	9100000	0.0229			sp|Q8BTS4|NUP54_MOUSE	Nup54	9	9	2700000	0.0106			sp|Q60692|PSB6_MOUSE	Psmb6	1	1	120000	0.000221			sp|P59114|PCIF1_MOUSE	Pcif1	1	1	130000	0.000304			sp|P63017|HSP7C_MOUSE	Hspa8	25	61	180000000	0.57		sp|Q91XV3|BASP1_MOUSE	Basp1
	sp|Q7TN29|SMAP2_MOUSE	Smap2	7	18	6900000	0.041			sp|P18052|PTPRA_MOUSE	Ptpra	9	11	1800000	0.00448			sp|Q99P72|RTN4_MOUSE	Rtn4	9	9	1600000	0.00637			sp|Q9JIG7|CCD22_MOUSE	Ccdc22	1	1	12000	2.3e-05			sp|Q9R0A0|PEX14_MOUSE	Pex14	1	1	130000	0.000305			sp|P61264|STX1B_MOUSE	Stx1b	25	57	55000000	0.18		sp|P26645|MARCS_MOUSE	Marcks
	sp|P21278|GNA11_MOUSE	Gna11	7	17	8400000	0.0498			sp|Q8BXZ1|TMX3_MOUSE	Tmx3	9	10	2500000	0.0064			sp|P57780|ACTN4_MOUSE	Actn4	9	9	1100000	0.00451			sp|P32883|RASK_MOUSE	Kras	1	1	680000	0.00129			sp|Q93092|TALDO_MOUSE	Taldo1	1	1	45000	0.000105			sp|P38647|GRP75_MOUSE	Hspa9	25	46	62000000	0.2		sp|Q9DCX2|ATP5H_MOUSE	Atp5h
	sp|Q8BG39|SV2B_MOUSE	Sv2b	7	16	3000000	0.0177			sp|Q69ZK9|NLGN2_MOUSE	Nlgn2	9	10	5000000	0.0126			sp|Q02053|UBA1_MOUSE	Uba1	9	9	2400000	0.00956			sp|Q91ZX7|LRP1_MOUSE	Lrp1	59	100	120000000	0.23			sp|P51791|CLCN3_MOUSE	Clcn3	1	1	170000	0.000387			sp|Q6PIE5|AT1A2_MOUSE	Atp1a2	25	36	96000000	0.31		sp|Q3UHL1|CAMKV_MOUSE	Camkv
	sp|Q9DAM7|TM263_MOUSE	Tmem263	7	15	4100000	0.0244			sp|Q61598|GDIB_MOUSE	Gdi2	9	10	2900000	0.00725			sp|Q61316|HSP74_MOUSE	Hspa4	9	9	910000	0.00359			sp|P50516|VATA_MOUSE	Atp6v1a	47	139	590000000	1.13			sp|Q9JJV4|CCG4_MOUSE	Cacng4	1	1	160000	0.000361			sp|P35564|CALX_MOUSE	Canx	24	69	130000000	0.42		sp|P51150|RAB7A_MOUSE	Rab7a
	sp|O54734|OST48_MOUSE	Ddost	7	15	2700000	0.0158			sp|P57780|ACTN4_MOUSE	Actn4	9	10	1600000	0.00398			sp|P63101|1433Z_MOUSE	Ywhaz	8	35	100000000	0.41			sp|P12960|CNTN1_MOUSE	Cntn1	46	141	350000000	0.66			tr|Q4VAD2|Q4VAD2_MOUSE	Gm13103	1	1	110000	0.000249			sp|P11499|HS90B_MOUSE	Hsp90ab1	24	44	29000000	0.0926		sp|Q9ET30|TM9S3_MOUSE	Tm9sf3
	sp|P97797|SHPS1_MOUSE	Sirpa	7	15	3000000	0.0178			sp|Q8CHG3|GCC2_MOUSE	Gcc2	9	10	1400000	0.00356			sp|Q91X97|NCALD_MOUSE	Ncald	8	22	27000000	0.11			sp|P13595|NCAM1_MOUSE	Ncam1	41	295	1700000000	3.31			sp|Q91ZX7|LRP1_MOUSE	Lrp1	67	111	110000000	0.26			sp|P27773|PDIA3_MOUSE	Pdia3	24	38	44000000	0.14		sp|Q8R5M8|CADM1_MOUSE	Cadm1
	sp|P00405|COX2_MOUSE	Mtco2	7	13	4900000	0.0291			sp|P24270|CATA_MOUSE	Cat	9	10	2100000	0.0054			sp|P62748|HPCL1_MOUSE	Hpcal1	8	21	10000000	0.0401			sp|Q62351|TFR1_MOUSE	Tfrc	41	164	530000000	1.02			sp|P50516|VATA_MOUSE	Atp6v1a	47	116	350000000	0.81			sp|Q6PIC6|AT1A3_MOUSE	Atp1a3	23	79	500000000	1.59		sp|P21278|GNA11_MOUSE	Gna11
	sp|Q9CZ13|QCR1_MOUSE	Uqcrc1	7	13	5300000	0.0312			sp|P50396|GDIA_MOUSE	Gdi1	9	9	2200000	0.00548			sp|P62821|RAB1A_MOUSE	Rab1A	8	17	19000000	0.0771			sp|P56480|ATPB_MOUSE	Atp5b	40	135	830000000	1.59			sp|P12960|CNTN1_MOUSE	Cntn1	44	119	240000000	0.55			sp|P62814|VATB2_MOUSE	Atp6v1b2	23	77	200000000	0.62		sp|P48453|PP2BB_MOUSE	Ppp3cb
	sp|P50518|VATE1_MOUSE	Atp6v1e1	7	13	2200000	0.0129			sp|Q9Z1L5|CA2D3_MOUSE	Cacna2d3	9	9	3100000	0.0079			sp|P63328|PP2BA_MOUSE	Ppp3ca	8	17	23000000	0.0901			sp|O55143|AT2A2_MOUSE	Atp2a2	38	64	98000000	0.19			sp|P56480|ATPB_MOUSE	Atp5b	41	150	810000000	1.88			sp|Q3UNH4|GRIN1_MOUSE	Gprin1	23	51	39000000	0.13		sp|Q9CQQ7|AT5F1_MOUSE	Atp5f1
	sp|Q61792|LASP1_MOUSE	Lasp1	7	13	10000000	0.0595			sp|P46096|SYT1_MOUSE	Syt1	9	9	2000000	0.00495			sp|Q922R8|PDIA6_MOUSE	Pdia6	8	16	7600000	0.03			sp|Q9Z1G4|VPP1_MOUSE	Atp6v0a1	37	219	2800000000	5.26			sp|Q62351|TFR1_MOUSE	Tfrc	40	119	270000000	0.63			sp|Q9ERD7|TBB3_MOUSE	Tubb3	23	50	170000000	0.55		sp|P61922|GABT_MOUSE	Abat
	sp|O08579|EMD_MOUSE	Emd	7	13	1700000	0.00988			sp|Q8BW96|KCC1D_MOUSE	Camk1d	9	9	3500000	0.00874			sp|Q9D6R2|IDH3A_MOUSE	Idh3a	8	16	11000000	0.0425			sp|Q91V14|S12A5_MOUSE	Slc12a5	37	88	180000000	0.34			sp|P13595|NCAM1_MOUSE	Ncam1	38	190	860000000	1.97			sp|O08599|STXB1_MOUSE	Stxbp1	23	49	32000000	0.1		sp|Q99NB8|UBQL4_MOUSE	Ubqln4
	sp|Q9Z1G3|VATC1_MOUSE	Atp6v1c1	7	13	2800000	0.0165			sp|Q60864|STIP1_MOUSE	Stip1	9	9	3900000	0.00989			sp|O55022|PGRC1_MOUSE	Pgrmc1	8	15	22000000	0.0854			sp|O89001|CBPD_MOUSE	Cpd	35	72	170000000	0.32			sp|P20029|GRP78_MOUSE	Hspa5	36	110	460000000	1.06			sp|P46096|SYT1_MOUSE	Syt1	23	42	39000000	0.13		sp|Q8BXN9|TM87A_MOUSE	Tmem87a
	sp|Q9D6F9|TBB4A_MOUSE	Tubb4a	7	12	1800000	0.0108			sp|P54227|STMN1_MOUSE	Stmn1	8	36	190000000	0.47			sp|Q99NB8|UBQL4_MOUSE	Ubqln4	8	15	5600000	0.022			sp|Q9EQF6|DPYL5_MOUSE	Dpysl5	34	138	1100000000	2.03			sp|O55143|AT2A2_MOUSE	Atp2a2	36	62	91000000	0.21			sp|P11627|L1CAM_MOUSE	L1cam	22	53	44000000	0.14		sp|O35136|NCAM2_MOUSE	Ncam2
	sp|P57716|NICA_MOUSE	Ncstn	7	12	1100000	0.00669			sp|Q8BLK3|LSAMP_MOUSE	Lsamp	8	27	35000000	0.0887			sp|P97825|JUPI1_MOUSE	JPT1	8	14	7500000	0.0296			sp|P97427|DPYL1_MOUSE	Crmp1	32	116	1500000000	2.85			sp|Q9EQF6|DPYL5_MOUSE	Dpysl5	35	145	1400000000	3.18			sp|O35526|STX1A_MOUSE	Stx1a	22	47	37000000	0.12		sp|Q922S4|PDE2A_MOUSE	Pde2a
	sp|Q6R0H7|GNAS1_MOUSE	Gnas	7	12	2800000	0.0166			sp|P97300|NPTN_MOUSE	Nptn	8	26	210000000	0.53			sp|Q63850|NUP62_MOUSE	Nup62	8	14	8800000	0.0349			sp|P70704|AT8A1_MOUSE	Atp8a1	32	46	81000000	0.15			sp|Q9Z1G4|VPP1_MOUSE	Atp6v0a1	34	149	1400000000	3.3			sp|P14211|CALR_MOUSE	Calr	21	58	150000000	0.47		sp|P53810|PIPNA_MOUSE	Pitpna
	sp|P12787|COX5A_MOUSE	Cox5a	7	12	4600000	0.0273			sp|P62748|HPCL1_MOUSE	Hpcal1	8	21	18000000	0.0451			sp|Q8K2B3|SDHA_MOUSE	Sdha	8	14	2700000	0.0108			sp|Q61548|AP180_MOUSE	Snap91	30	125	910000000	1.73			sp|P08113|ENPL_MOUSE	Hsp90b1	34	64	160000000	0.36			sp|Q9D0K2|SCOT1_MOUSE	Oxct1	21	34	36000000	0.12		sp|Q9D1T0|LIGO1_MOUSE	Lingo1
	tr|A1L3P4|A1L3P4_MOUSE	Slc9a6	7	12	1200000	0.00735			sp|O35874|SATT_MOUSE	Slc1a4	8	19	26000000	0.0663			sp|Q9DAM7|TM263_MOUSE	Tmem263	8	13	7000000	0.0276			sp|Q8VDN2|AT1A1_MOUSE	Atp1a1	30	92	880000000	1.68			sp|P97427|DPYL1_MOUSE	Crmp1	33	121	1400000000	3.32			sp|Q64332|SYN2_MOUSE	Syn2	21	33	40000000	0.13		sp|Q9DC07|LNEBL_MOUSE	Nebl
	sp|Q8BTS4|NUP54_MOUSE	Nup54	7	11	2700000	0.0161			sp|Q99JP7|GGT7_MOUSE	Ggt7	8	16	5300000	0.0132			sp|P0DP27|CALM2_MOUSE	Calm2	8	13	29000000	0.12			sp|P08113|ENPL_MOUSE	Hsp90b1	30	55	140000000	0.26			sp|Q80UG2|PLXA4_MOUSE	Plxna4	33	39	13000000	0.0291			sp|Q6P5E4|UGGG1_MOUSE	Uggt1	21	24	7300000	0.0232		sp|Q9Z2G6|SE1L1_MOUSE	Sel1l
	sp|Q9D1C8|VPS28_MOUSE	Vps28	7	11	930000	0.00552			sp|Q91X97|NCALD_MOUSE	Ncald	8	15	48000000	0.12			sp|O08579|EMD_MOUSE	Emd	8	13	2800000	0.011			sp|P20029|GRP78_MOUSE	Hspa5	29	110	560000000	1.06			sp|Q91V14|S12A5_MOUSE	Slc12a5	32	60	98000000	0.23			sp|Q80UG2|PLXA4_MOUSE	Plxna4	21	23	6500000	0.0206		sp|Q3TXX4|VGLU1_MOUSE	Slc17a7
	sp|Q09143|CTR1_MOUSE	Slc7a1	7	11	1200000	0.00727			sp|Q63850|NUP62_MOUSE	Nup62	8	14	15000000	0.0366			sp|P57759|ERP29_MOUSE	Erp29	8	13	6600000	0.0262			sp|O08532|CA2D1_MOUSE	Cacna2d1	29	52	170000000	0.32			sp|O89001|CBPD_MOUSE	Cpd	31	57	100000000	0.24			sp|P62761|VISL1_MOUSE	Vsnl1	20	122	770000000	2.47		sp|P57746|VATD_MOUSE	Atp6v1d
	sp|Q9QYF9|NDRG3_MOUSE	Ndrg3	7	11	1700000	0.0102			sp|Q9D6F9|TBB4A_MOUSE	Tubb4a	8	14	14000000	0.0355			sp|P17742|PPIA_MOUSE	Ppia	8	13	29000000	0.12			sp|Q80UG2|PLXA4_MOUSE	Plxna4	29	36	20000000	0.0381			sp|Q99KI0|ACON_MOUSE	Aco2	31	47	63000000	0.15			sp|Q9D394|RUFY3_MOUSE	Rufy3	20	64	110000000	0.34		sp|P70206|PLXA1_MOUSE	Plxna1
	sp|P54763|EPHB2_MOUSE	Ephb2	7	10	1600000	0.0097			sp|Q63810|CANB1_MOUSE	Ppp3r1	8	14	14000000	0.0363			sp|P48318|DCE1_MOUSE	Gad1	8	12	1900000	0.0074			sp|P16546|SPTN1_MOUSE	Sptan1	29	29	8900000	0.017			sp|Q61548|AP180_MOUSE	Snap91	30	124	840000000	1.93			sp|P17710|HXK1_MOUSE	Hk1	20	32	33000000	0.11		sp|P39688|FYN_MOUSE	Fyn
	sp|Q8K0U4|HS12A_MOUSE	Hspa12a	7	10	1700000	0.0102			sp|Q922R8|PDIA6_MOUSE	Pdia6	8	14	11000000	0.0283			sp|Q9DAW9|CNN3_MOUSE	Cnn3	8	12	1700000	0.00675			sp|Q03265|ATPA_MOUSE	Atp5a1	28	97	480000000	0.92			sp|P11627|L1CAM_MOUSE	L1cam	30	63	95000000	0.22			sp|P70232|NCHL1_MOUSE	Chl1	20	31	12000000	0.0389		sp|Q61316|HSP74_MOUSE	Hspa4
	sp|P37040|NCPR_MOUSE	Por	7	10	1000000	0.00599			sp|Q99NB8|UBQL4_MOUSE	Ubqln4	8	14	8100000	0.0204			sp|Q63810|CANB1_MOUSE	Ppp3r1	8	11	9600000	0.0382			sp|Q99KI0|ACON_MOUSE	Aco2	28	48	90000000	0.17			sp|Q9JKR6|HYOU1_MOUSE	Hyou1	30	42	22000000	0.0498			sp|Q9R0K7|AT2B2_MOUSE	Atp2b2	20	30	25000000	0.0798		sp|Q91XM9|DLG2_MOUSE	Dlg2
	sp|Q78JW9|UBFD1_MOUSE	Ubfd1	7	10	1900000	0.0114			sp|P63328|PP2BA_MOUSE	Ppp3ca	8	14	26000000	0.0642			sp|Q9CZ13|QCR1_MOUSE	Uqcrc1	8	11	7800000	0.0308			sp|Q68FD5|CLH1_MOUSE	Cltc	28	32	15000000	0.0279			sp|Q3UNH4|GRIN1_MOUSE	Gprin1	29	63	68000000	0.16			sp|Q810U4|NRCAM_MOUSE	Nrcam	20	26	10000000	0.0328		sp|Q80V26|IMPA3_MOUSE	Impad1
	sp|Q9CX34|SGT1_MOUSE	Sugt1	7	10	1500000	0.00862			sp|Q8C0L0|TMX4_MOUSE	Tmx4	8	13	8900000	0.0223			sp|Q9D6F9|TBB4A_MOUSE	Tubb4a	8	11	7100000	0.0283			sp|O08553|DPYL2_MOUSE	Dpysl2	27	187	3200000000	6.13			sp|Q8BHN3|GANAB_MOUSE	Ganab	29	33	15000000	0.0354			sp|Q64521|GPDM_MOUSE	Gpd2	20	22	9100000	0.0292		sp|Q8R317|UBQL1_MOUSE	Ubqln1
	sp|P17182|ENOA_MOUSE	Eno1	7	10	1800000	0.0107			sp|P46638|RB11B_MOUSE	Rab11b	8	13	20000000	0.0513			sp|Q8BK64|AHSA1_MOUSE	Ahsa1	8	11	5100000	0.0201			sp|Q62188|DPYL3_MOUSE	Dpysl3	27	107	1200000000	2.23			sp|O08553|DPYL2_MOUSE	Dpysl2	28	210	4300000000	9.91			sp|Q8BVE3|VATH_MOUSE	Atp6v1h	19	56	42000000	0.13		sp|Q3UHJ0|AAK1_MOUSE	Aak1
	sp|P26443|DHE3_MOUSE	Glud1	7	9	790000	0.00466			sp|Q9CZ44|NSF1C_MOUSE	Nsfl1c	8	12	7800000	0.0195			sp|Q6R0H7|GNAS1_MOUSE	Gnas	8	11	2900000	0.0117			sp|P62814|VATB2_MOUSE	Atp6v1b2	27	95	380000000	0.72			sp|Q62188|DPYL3_MOUSE	Dpysl3	28	118	1400000000	3.24			sp|P70207|PLXA2_MOUSE	Plxna2	19	23	5800000	0.0186		sp|Q9CPW0|CNTP2_MOUSE	Cntnap2
	sp|Q62418|DBNL_MOUSE	Dbnl	7	8	1000000	0.00604			sp|P0DP27|CALM2_MOUSE	Calm2	8	12	46000000	0.12			sp|Q9Z2G6|SE1L1_MOUSE	Sel1l	8	10	1700000	0.00659			sp|P35564|CALX_MOUSE	Canx	27	87	270000000	0.51			sp|Q8VDN2|AT1A1_MOUSE	Atp1a1	28	80	560000000	1.3			sp|Q64487|PTPRD_MOUSE	Ptprd	19	19	4700000	0.0151		sp|Q6PDS3|SARM1_MOUSE	Sarm1
	sp|Q91XM9|DLG2_MOUSE	Dlg2	7	8	990000	0.00586			sp|Q99KW9|TIP_MOUSE	Itfg1	8	11	6000000	0.015			sp|Q9DB05|SNAA_MOUSE	Napa	8	10	5300000	0.0209			sp|P11627|L1CAM_MOUSE	L1cam	27	68	140000000	0.27			sp|P35564|CALX_MOUSE	Canx	28	77	230000000	0.54			sp|P60710|ACTB_MOUSE	Actb	18	93	220000000	0.7		sp|O55042|SYUA_MOUSE	Snca
	sp|Q6ZQ38|CAND1_MOUSE	Cand1	7	8	700000	0.00412			sp|P97807|FUMH_MOUSE	Fh	8	10	2600000	0.00648			sp|Q61411|RASH_MOUSE	Hras	8	10	2900000	0.0115			sp|G5E829|AT2B1_MOUSE	Atp2b1	27	61	190000000	0.36			sp|Q64332|SYN2_MOUSE	Syn2	28	52	69000000	0.16			sp|P60879|SNP25_MOUSE	Snap25	18	44	72000000	0.23		sp|P54227|STMN1_MOUSE	Stmn1
	sp|Q03517|SCG2_MOUSE	Scg2	7	8	530000	0.00311			sp|Q04447|KCRB_MOUSE	Ckb	8	10	64000000	0.16			sp|O35136|NCAM2_MOUSE	Ncam2	8	10	2600000	0.0101			sp|P38647|GRP75_MOUSE	Hspa9	26	57	120000000	0.24			sp|P46460|NSF_MOUSE	Nsf	28	40	34000000	0.0782			sp|Q9Z218|DPP6_MOUSE	Dpp6	18	35	48000000	0.15		sp|Q9CQW1|YKT6_MOUSE	Ykt6
	sp|Q6ZQA6|IGSF3_MOUSE	Igsf3	7	8	540000	0.00321			sp|P70297|STAM1_MOUSE	Stam	8	10	3200000	0.00802			sp|Q99KW9|TIP_MOUSE	Itfg1	8	10	2900000	0.0116			sp|O08599|STXB1_MOUSE	Stxbp1	26	53	66000000	0.13			sp|Q68FD5|CLH1_MOUSE	Cltc	28	32	10000000	0.0232			sp|Q9ES97|RTN3_MOUSE	Rtn3	18	30	18000000	0.0584		sp|Q9CQW2|ARL8B_MOUSE	Arl8b
	sp|P52480|KPYM_MOUSE	Pkm	7	8	1200000	0.00718			sp|Q922S4|PDE2A_MOUSE	Pde2a	8	10	1500000	0.00373			sp|Q8R5M8|CADM1_MOUSE	Cadm1	8	9	5600000	0.0222			sp|Q9JKR6|HYOU1_MOUSE	Hyou1	26	33	20000000	0.0386			sp|P63038|CH60_MOUSE	Hspd1	27	55	71000000	0.16			sp|Q9Z1G3|VATC1_MOUSE	Atp6v1c1	18	27	26000000	0.0843		sp|P62821|RAB1A_MOUSE	Rab1A
	sp|Q99KJ8|DCTN2_MOUSE	Dctn2	7	7	630000	0.00375			sp|Q05920|PYC_MOUSE	Pc	8	10	910000	0.00228			sp|Q4V9Z5|SE6L2_MOUSE	Sez6l2	8	9	2400000	0.00934			sp|Q6PIC6|AT1A3_MOUSE	Atp1a3	25	111	1200000000	2.32			sp|P38647|GRP75_MOUSE	Hspa9	27	48	78000000	0.18			sp|P70414|NAC1_MOUSE	Slc8a1	18	25	20000000	0.065		sp|P17156|HSP72_MOUSE	Hspa2
	sp|P23819|GRIA2_MOUSE	Gria2	7	7	470000	0.00276			tr|Q91VA7|Q91VA7_MOUSE	Idh3b	8	10	2000000	0.00496			tr|Q9Z1A1|Q9Z1A1_MOUSE	Tfg	8	9	3400000	0.0133			sp|P63017|HSP7C_MOUSE	Hspa8	25	73	310000000	0.59			sp|G5E829|AT2B1_MOUSE	Atp2b1	27	47	97000000	0.22			sp|P18872|GNAO_MOUSE	Gnao1	17	74	230000000	0.73		sp|O35874|SATT_MOUSE	Slc1a4
	sp|Q9DAW9|CNN3_MOUSE	Cnn3	7	7	430000	0.00254			sp|Q8BLQ9|CADM2_MOUSE	Cadm2	8	10	12000000	0.0308			sp|Q99J85|NPTXR_MOUSE	Nptxr	8	9	4400000	0.0173			sp|P46096|SYT1_MOUSE	Syt1	25	70	230000000	0.43			sp|P70704|AT8A1_MOUSE	Atp8a1	27	39	45000000	0.1			sp|P10852|4F2_MOUSE	Slc3a2	17	47	99000000	0.31		sp|Q62433|NDRG1_MOUSE	Ndrg1
	sp|Q9EPN1|NBEA_MOUSE	Nbea	7	7	280000	0.00165			sp|Q9Z2G6|SE1L1_MOUSE	Sel1l	8	9	3500000	0.00873			sp|Q8R570|SNP47_MOUSE	Snap47	8	9	2000000	0.00793			sp|Q3UNH4|GRIN1_MOUSE	Gprin1	25	63	110000000	0.21			sp|Q03265|ATPA_MOUSE	Atp5a1	26	88	490000000	1.12			sp|Q9CQF9|PCYOX_MOUSE	Pcyox1	17	29	20000000	0.0623		sp|Q9JKF6|NECT1_MOUSE	Nectin1
	sp|Q9CS84|NRX1A_MOUSE	Nrxn1	7	7	710000	0.0042			sp|Q922P8|T132A_MOUSE	Tmem132a	8	9	2000000	0.00501			sp|Q09143|CTR1_MOUSE	Slc7a1	8	9	2100000	0.00851			sp|P11499|HS90B_MOUSE	Hsp90ab1	25	47	61000000	0.12			sp|P61264|STX1B_MOUSE	Stx1b	26	50	84000000	0.19			sp|Q6GQT9|NOMO1_MOUSE	Nomo1	17	19	11000000	0.0343		sp|Q922R8|PDIA6_MOUSE	Pdia6
	sp|P62874|GBB1_MOUSE	Gnb1	6	110	190000000	1.13			sp|Q9DC07|LNEBL_MOUSE	Nebl	8	9	4700000	0.0118			sp|P54763|EPHB2_MOUSE	Ephb2	8	9	2400000	0.00941			sp|P63038|CH60_MOUSE	Hspd1	25	43	51000000	0.0967			sp|P16546|SPTN1_MOUSE	Sptan1	26	27	6500000	0.015			sp|Q9WU78|PDC6I_MOUSE	Pdcd6ip	17	19	6500000	0.0207		sp|P57759|ERP29_MOUSE	Erp29
	sp|Q62277|SYPH_MOUSE	Syp	6	24	66000000	0.39			sp|Q9QXS6|DREB_MOUSE	Dbn1	8	9	3500000	0.00891			sp|Q8BLF1|NCEH1_MOUSE	Nceh1	8	9	3600000	0.0142			sp|P46460|NSF_MOUSE	Nsf	25	38	48000000	0.0907			sp|Q6PIC6|AT1A3_MOUSE	Atp1a3	25	100	840000000	1.94			sp|P68369|TBA1A_MOUSE	Tuba1a	16	64	500000000	1.61		sp|Q9DCN2|NB5R3_MOUSE	Cyb5r3
	sp|P14094|AT1B1_MOUSE	Atp1b1	6	23	54000000	0.32			sp|P53810|PIPNA_MOUSE	Pitpna	8	9	5600000	0.0141			sp|Q922P8|T132A_MOUSE	Tmem132a	8	8	920000	0.00364			sp|Q9R0K7|AT2B2_MOUSE	Atp2b2	25	37	63000000	0.12			sp|P17710|HXK1_MOUSE	Hk1	25	44	64000000	0.15			sp|P28663|SNAB_MOUSE	Napb	16	47	77000000	0.25		sp|Q9R1Q9|VAS1_MOUSE	Atp6ap1
	sp|P17742|PPIA_MOUSE	Ppia	6	21	31000000	0.18			tr|A1L3P4|A1L3P4_MOUSE	Slc9a6	8	9	13000000	0.032			sp|Q8CIN4|PAK2_MOUSE	Pak2	8	8	1800000	0.00723			sp|P70232|NCHL1_MOUSE	Chl1	25	36	27000000	0.0507			sp|Q6PIE5|AT1A2_MOUSE	Atp1a2	25	41	110000000	0.25			sp|P97792|CXAR_MOUSE	Cxadr	16	29	48000000	0.15		sp|Q9DB05|SNAA_MOUSE	Napa
	sp|Q9CZY3|UB2V1_MOUSE	Ube2v1	6	19	180000000	1.05			sp|Q9D1T0|LIGO1_MOUSE	Lingo1	8	9	6100000	0.0154			sp|Q8BHZ0|FA49A_MOUSE	Fam49a	8	8	2700000	0.0108			sp|Q9ERD7|TBB3_MOUSE	Tubb3	24	65	390000000	0.75			sp|Q6P5E4|UGGG1_MOUSE	Uggt1	25	26	8800000	0.0204			sp|Q02819|NUCB1_MOUSE	Nucb1	16	27	13000000	0.0419		sp|Q8VBZ3|CLPT1_MOUSE	Clptm1
	sp|P61027|RAB10_MOUSE	Rab10	6	19	71000000	0.42			sp|Q61316|HSP74_MOUSE	Hspa4	8	8	1500000	0.00367			sp|Q8K400|STXB5_MOUSE	Stxbp5	8	8	1200000	0.00481			sp|O35098|DPYL4_MOUSE	Dpysl4	24	54	120000000	0.23			sp|Q9D394|RUFY3_MOUSE	Rufy3	24	65	160000000	0.37			sp|Q8BJI1|S6A17_MOUSE	Slc6a17	16	25	20000000	0.0645		sp|Q9QXS6|DREB_MOUSE	Dbn1
	sp|Q91X97|NCALD_MOUSE	Ncald	6	18	37000000	0.22			sp|Q6PB44|PTN23_MOUSE	Ptpn23	8	8	1600000	0.00399			sp|P70175|DLG3_MOUSE	Dlg3	8	8	980000	0.0039			sp|Q9D0K2|SCOT1_MOUSE	Oxct1	24	49	65000000	0.12			sp|P63017|HSP7C_MOUSE	Hspa8	24	60	190000000	0.45			sp|Q80TZ3|AUXI_MOUSE	Dnajc6	16	25	18000000	0.0577		sp|Q61598|GDIB_MOUSE	Gdi2
	sp|P57759|ERP29_MOUSE	Erp29	6	18	5100000	0.0301			sp|Q8BHZ0|FA49A_MOUSE	Fam49a	8	8	2900000	0.00718			sp|Q9EQH3|VPS35_MOUSE	Vps35	8	8	1300000	0.00496			sp|P17710|HXK1_MOUSE	Hk1	24	43	82000000	0.16			sp|P46096|SYT1_MOUSE	Syt1	24	53	69000000	0.16			sp|P09103|PDIA1_MOUSE	P4hb	16	21	10000000	0.033		tr|Q8C048|Q8C048_MOUSE	Atp2b3
	sp|P35803|GPM6B_MOUSE	Gpm6b	6	15	16000000	0.0951			sp|Q76MZ3|2AAA_MOUSE	Ppp2r1a	8	8	2800000	0.00692			sp|Q8BSL7|ARF2_MOUSE	Arf2	7	43	270000000	1.08			sp|Q9Z2H5|E41L1_MOUSE	Epb41l1	23	52	62000000	0.12			sp|P70414|NAC1_MOUSE	Slc8a1	24	45	44000000	0.1			sp|Q9EQH3|VPS35_MOUSE	Vps35	16	19	6100000	0.0196		sp|Q76MZ3|2AAA_MOUSE	Ppp2r1a
	sp|P61982|1433G_MOUSE	Ywhag	6	14	7200000	0.0423			sp|Q3UPL0|SC31A_MOUSE	Sec31a	8	8	2400000	0.00614			sp|O35874|SATT_MOUSE	Slc1a4	7	19	17000000	0.0679			sp|Q64332|SYN2_MOUSE	Syn2	23	43	61000000	0.12			sp|O08599|STXB1_MOUSE	Stxbp1	24	44	46000000	0.11			sp|P08003|PDIA4_MOUSE	Pdia4	16	17	5600000	0.018		sp|O88935|SYN1_MOUSE	Syn1
	sp|Q07076|ANXA7_MOUSE	Anxa7	6	14	3500000	0.0208			sp|Q61699|HS105_MOUSE	Hsph1	8	8	1600000	0.00399			sp|P18572|BASI_MOUSE	Bsg	7	19	11000000	0.0434			sp|Q64487|PTPRD_MOUSE	Ptprd	23	25	14000000	0.0258			sp|O08532|CA2D1_MOUSE	Cacna2d1	24	43	100000000	0.23			sp|Q9DBG3|AP2B1_MOUSE	Ap2b1	16	17	4000000	0.0127		sp|O35454|CLCN6_MOUSE	Clcn6
	sp|P07901|HS90A_MOUSE	Hsp90aa1	6	14	3500000	0.0207			sp|P19096|FAS_MOUSE	Fasn	8	8	920000	0.00231			sp|P61027|RAB10_MOUSE	Rab10	7	18	66000000	0.26			sp|Q8BVE3|VATH_MOUSE	Atp6v1h	22	54	65000000	0.12			sp|P11499|HS90B_MOUSE	Hsp90ab1	24	42	50000000	0.12			sp|Q9JIS5|SV2A_MOUSE	Sv2a	15	98	350000000	1.12		tr|Q0VGU4|Q0VGU4_MOUSE	Vgf
	sp|P35278|RAB5C_MOUSE	Rab5c	6	14	1000000	0.00601			sp|Q9Z1R2|BAG6_MOUSE	Bag6	8	8	1200000	0.00303			sp|Q62277|SYPH_MOUSE	Syp	7	18	72000000	0.28			sp|O35526|STX1A_MOUSE	Stx1a	22	45	55000000	0.1			sp|P27773|PDIA3_MOUSE	Pdia3	24	31	44000000	0.1			sp|Q99KN9|EPN4_MOUSE	Clint1	15	36	23000000	0.0729		sp|Q8C129|LCAP_MOUSE	Lnpep
	sp|Q91V41|RAB14_MOUSE	Rab14	6	13	4400000	0.0259			sp|Q8BSL7|ARF2_MOUSE	Arf2	7	40	330000000	0.82			sp|P19783|COX41_MOUSE	Cox4i1	7	15	11000000	0.0451			sp|Q810U4|NRCAM_MOUSE	Nrcam	22	33	33000000	0.0621			sp|P62814|VATB2_MOUSE	Atp6v1b2	23	73	240000000	0.55			sp|Q6Q477|AT2B4_MOUSE	Atp2b4	15	30	53000000	0.17		sp|Q9JHZ2|ANKH_MOUSE	Ankh
	sp|Q8BVE3|VATH_MOUSE	Atp6v1h	6	13	1700000	0.0103			sp|P31324|KAP3_MOUSE	Prkar2b	7	23	16000000	0.041			sp|Q61792|LASP1_MOUSE	Lasp1	7	14	14000000	0.0563			sp|Q99P72|RTN4_MOUSE	Rtn4	22	32	15000000	0.0279			sp|Q9ERD7|TBB3_MOUSE	Tubb3	23	62	350000000	0.8			sp|Q8BFU3|RN214_MOUSE	Rnf214	15	22	12000000	0.0378		sp|Q9JLB0|MPP6_MOUSE	Mpp6
	sp|Q99N28|CADM3_MOUSE	Cadm3	6	13	9100000	0.0539			sp|P14094|AT1B1_MOUSE	Atp1b1	7	21	180000000	0.45			sp|Q60930|VDAC2_MOUSE	Vdac2	7	14	18000000	0.0707			sp|P23819|GRIA2_MOUSE	Gria2	22	30	35000000	0.0659			sp|O35098|DPYL4_MOUSE	Dpysl4	23	49	110000000	0.27			sp|D3Z7P3|GLSK_MOUSE	Gls	15	21	11000000	0.0367		sp|Q91YJ2|SNX4_MOUSE	Snx4
	sp|Q7M6Y3|PICAL_MOUSE	Picalm	6	12	1700000	0.0103			sp|Q60931|VDAC3_MOUSE	Vdac3	7	18	42000000	0.11			sp|Q99N28|CADM3_MOUSE	Cadm3	7	13	20000000	0.0803			sp|P70207|PLXA2_MOUSE	Plxna2	22	27	13000000	0.024			sp|Q9Z218|DPP6_MOUSE	Dpp6	23	41	64000000	0.15			sp|Q9Z0R4|ITSN1_MOUSE	Itsn1	15	17	4000000	0.0128		sp|Q61739|ITA6_MOUSE	Itga6
	sp|Q63850|NUP62_MOUSE	Nup62	6	12	2200000	0.0129			sp|P62821|RAB1A_MOUSE	Rab1A	7	17	19000000	0.0486			sp|Q9JJY3|NSMA2_MOUSE	Smpd3	7	12	2000000	0.00785			sp|Q9D394|RUFY3_MOUSE	Rufy3	21	58	130000000	0.26			sp|Q9R0K7|AT2B2_MOUSE	Atp2b2	23	36	39000000	0.0911			sp|P97807|FUMH_MOUSE	Fh	15	16	5300000	0.0169		sp|Q8JZN5|ACAD9_MOUSE	Acad9
	sp|Q63810|CANB1_MOUSE	Ppp3r1	6	12	4500000	0.0264			sp|P35803|GPM6B_MOUSE	Gpm6b	7	17	21000000	0.0532			sp|Q61735|CD47_MOUSE	Cd47	7	12	10000000	0.0402			sp|P61264|STX1B_MOUSE	Stx1b	21	55	83000000	0.16			sp|P14211|CALR_MOUSE	Calr	22	72	210000000	0.49			sp|Q5SV85|SYNRG_MOUSE	Synrg	15	15	9100000	0.0289		sp|Q8BL66|EEA1_MOUSE	Eea1
	sp|Q9D8Y0|EFHD2_MOUSE	Efhd2	6	12	2200000	0.0129			sp|Q61735|CD47_MOUSE	Cd47	7	16	29000000	0.0735			sp|Q9D1D4|TMEDA_MOUSE	Tmed10	7	11	5800000	0.0231			sp|P70414|NAC1_MOUSE	Slc8a1	21	36	50000000	0.0948			sp|Q9D0K2|SCOT1_MOUSE	Oxct1	22	41	52000000	0.12			sp|Q9QYE6|GOGA5_MOUSE	Golga5	15	15	3500000	0.0113		sp|Q8CHG3|GCC2_MOUSE	Gcc2
	sp|P10637|TAU_MOUSE	Mapt	6	12	3100000	0.0185			sp|Q60930|VDAC2_MOUSE	Vdac2	7	16	33000000	0.083			sp|P31648|SC6A1_MOUSE	Slc6a1	7	11	22000000	0.0878			sp|Q6PIE5|AT1A2_MOUSE	Atp1a2	21	28	150000000	0.29			sp|Q9ES97|RTN3_MOUSE	Rtn3	22	30	28000000	0.0645			sp|Q8K1M6|DNM1L_MOUSE	Dnm1l	15	15	3700000	0.0118		sp|P63011|RAB3A_MOUSE	Rab3a
	sp|O70439|STX7_MOUSE	Stx7	6	11	3200000	0.0189			sp|P97825|JUPI1_MOUSE	JPT1	7	15	21000000	0.0531			sp|Q99JP7|GGT7_MOUSE	Ggt7	7	11	2700000	0.0106			sp|P27773|PDIA3_MOUSE	Pdia3	21	28	39000000	0.0744			sp|P70207|PLXA2_MOUSE	Plxna2	22	27	9500000	0.022			sp|Q8BYI8|F234B_MOUSE	Fam234b	15	15	7900000	0.0251		sp|P43006|EAA2_MOUSE	Slc1a2
	sp|P97384|ANX11_MOUSE	Anxa11	6	11	1700000	0.00985			sp|Q8K2B3|SDHA_MOUSE	Sdha	7	14	5900000	0.0147			sp|Q9R1Q8|TAGL3_MOUSE	Tagln3	7	11	4100000	0.0161			sp|Q8BHN3|GANAB_MOUSE	Ganab	21	25	19000000	0.0361			sp|Q61879|MYH10_MOUSE	Myh10	22	25	6500000	0.015			sp|P06837|NEUM_MOUSE	Gap43	14	187	160000000	0.5		sp|P97300|NPTN_MOUSE	Nptn
	sp|P21279|GNAQ_MOUSE	Gnaq	6	11	7700000	0.0454			sp|O55022|PGRC1_MOUSE	Pgrmc1	7	14	32000000	0.0809			sp|Q91VR2|ATPG_MOUSE	Atp5c1	7	11	11000000	0.0445			sp|P60710|ACTB_MOUSE	Actb	20	99	420000000	0.79			sp|Q64487|PTPRD_MOUSE	Ptprd	22	24	9100000	0.0209			sp|Q62277|SYPH_MOUSE	Syp	14	59	800000000	2.55		sp|P46638|RB11B_MOUSE	Rab11b
	sp|Q8BR92|PALM2_MOUSE	Palm2	6	11	1200000	0.00731			sp|Q07076|ANXA7_MOUSE	Anxa7	7	14	11000000	0.0277			sp|P62823|RAB3C_MOUSE	Rab3c	7	10	5200000	0.0204			sp|P14211|CALR_MOUSE	Calr	20	55	170000000	0.32			sp|P60710|ACTB_MOUSE	Actb	21	90	280000000	0.65			sp|Q60932|VDAC1_MOUSE	Vdac1	14	50	310000000	1.01		sp|Q9EPJ9|ARFG1_MOUSE	Arfgap1
	sp|Q61411|RASH_MOUSE	Hras	6	11	2000000	0.012			sp|P15532|NDKA_MOUSE	Nme1	7	11	3400000	0.00856			sp|P99027|RLA2_MOUSE	Rplp2	7	10	26000000	0.1			sp|Q9Z218|DPP6_MOUSE	Dpp6	20	47	93000000	0.18			sp|Q9Z2H5|E41L1_MOUSE	Epb41l1	21	39	43000000	0.0997			sp|Q9CWF2|TBB2B_MOUSE	Tubb2b	14	44	89000000	0.28		sp|P62748|HPCL1_MOUSE	Hpcal1
	sp|Q9CQQ7|AT5F1_MOUSE	Atp5f1	6	11	1700000	0.0103			sp|Q8C7K6|PCYXL_MOUSE	Pcyox1l	7	11	9600000	0.0242			sp|Q8K2K6|AGFG1_MOUSE	Agfg1	7	10	8900000	0.0354			sp|Q6Q477|AT2B4_MOUSE	Atp2b4	20	33	110000000	0.22			sp|O35526|STX1A_MOUSE	Stx1a	21	36	39000000	0.0909			sp|Q8K0T0|RTN1_MOUSE	Rtn1	14	34	38000000	0.12		sp|Q91V41|RAB14_MOUSE	Rab14
	sp|Q921M7|FA49B_MOUSE	Fam49b	6	10	2600000	0.0156			sp|Q9D7N9|APMAP_MOUSE	Apmap	7	11	3800000	0.00942			sp|Q3UYC0|PPM1H_MOUSE	Ppm1h	7	10	1800000	0.00702			sp|Q8K0T0|RTN1_MOUSE	Rtn1	20	30	39000000	0.0742			sp|Q9CQF9|PCYOX_MOUSE	Pcyox1	21	31	32000000	0.074			sp|Q9Z2H5|E41L1_MOUSE	Epb41l1	14	19	13000000	0.0426		sp|Q61792|LASP1_MOUSE	Lasp1
	sp|Q8K596|NAC2_MOUSE	Slc8a2	6	10	2000000	0.012			sp|P99029|PRDX5_MOUSE	Prdx5	7	11	18000000	0.0454			sp|Q9ERT9|PPR1A_MOUSE	Ppp1r1a	7	10	2400000	0.00947			sp|Q60902|EP15R_MOUSE	Eps15l1	20	24	13000000	0.0256			sp|P70232|NCHL1_MOUSE	Chl1	21	29	17000000	0.0391			sp|Q9ERB0|SNP29_MOUSE	Snap29	14	18	12000000	0.039		sp|Q9CZ13|QCR1_MOUSE	Uqcrc1
	sp|P70206|PLXA1_MOUSE	Plxna1	6	10	17000000	0.1			sp|Q8BR92|PALM2_MOUSE	Palm2	7	11	4100000	0.0104			sp|Q9ERE7|MESD_MOUSE	Mesdc2	7	10	2700000	0.0105			sp|P97792|CXAR_MOUSE	Cxadr	19	42	120000000	0.22			sp|Q810U4|NRCAM_MOUSE	Nrcam	21	26	19000000	0.0439			sp|P40142|TKT_MOUSE	Tkt	14	18	8500000	0.027		sp|Q8VEK0|CC50A_MOUSE	Tmem30a
	sp|Q8C0L0|TMX4_MOUSE	Tmx4	6	9	2600000	0.0155			sp|Q6PDM2|SRSF1_MOUSE	Srsf1	7	11	3900000	0.00988			sp|P21279|GNAQ_MOUSE	Gnaq	7	10	9500000	0.0377			sp|Q61879|MYH10_MOUSE	Myh10	19	23	6000000	0.0113			sp|Q5SV85|SYNRG_MOUSE	Synrg	21	25	22000000	0.0508			sp|P84084|ARF5_MOUSE	Arf5	13	43	240000000	0.77		sp|Q9CZ44|NSF1C_MOUSE	Nsfl1c
	sp|Q9ER00|STX12_MOUSE	Stx12	6	9	2300000	0.0137			sp|Q9JJY3|NSMA2_MOUSE	Smpd3	7	10	3300000	0.00839			sp|P28658|ATX10_MOUSE	Atxn10	7	10	760000	0.00301			sp|Q9JIS5|SV2A_MOUSE	Sv2a	18	131	1200000000	2.27			sp|P23819|GRIA2_MOUSE	Gria2	21	24	13000000	0.0292			sp|Q9DCX2|ATP5H_MOUSE	Atp5h	13	27	22000000	0.0697		sp|Q99KW9|TIP_MOUSE	Itfg1
	sp|Q9Z1R2|BAG6_MOUSE	Bag6	6	9	820000	0.00487			sp|P68510|1433F_MOUSE	Ywhah	7	10	5400000	0.0135			tr|A1L3P4|A1L3P4_MOUSE	Slc9a6	7	10	2300000	0.00892			sp|P62761|VISL1_MOUSE	Vsnl1	18	96	720000000	1.37			sp|Q6GQT9|NOMO1_MOUSE	Nomo1	21	23	8400000	0.0195			sp|Q9Z0P4|PALM_MOUSE	Palm	13	26	93000000	0.3		sp|P61294|RAB6B_MOUSE	Rab6b
	sp|Q99JY9|ARP3_MOUSE	Actr3	6	9	1200000	0.00698			sp|P57759|ERP29_MOUSE	Erp29	7	10	5200000	0.0131			sp|Q6PHU5|SORT_MOUSE	Sort1	7	10	3200000	0.0126			sp|P18872|GNAO_MOUSE	Gnao1	18	86	600000000	1.14			sp|P62761|VISL1_MOUSE	Vsnl1	20	101	790000000	1.83			sp|P50518|VATE1_MOUSE	Atp6v1e1	13	24	45000000	0.14		sp|O08579|EMD_MOUSE	Emd
	sp|P39688|FYN_MOUSE	Fyn	6	9	760000	0.00447			sp|Q3UHJ0|AAK1_MOUSE	Aak1	7	9	2000000	0.00502			sp|P70297|STAM1_MOUSE	Stam	7	9	1900000	0.00748			sp|P60879|SNP25_MOUSE	Snap25	18	37	75000000	0.14			sp|Q8BVE3|VATH_MOUSE	Atp6v1h	20	49	55000000	0.13			sp|Q9CWZ7|SNAG_MOUSE	Napg	13	23	27000000	0.0865		sp|Q4V9Z5|SE6L2_MOUSE	Sez6l2
	sp|Q9R1Q9|VAS1_MOUSE	Atp6ap1	6	9	1500000	0.00862			sp|Q62418|DBNL_MOUSE	Dbnl	7	9	6300000	0.0158			sp|P32037|GTR3_MOUSE	Slc2a3	7	9	4700000	0.0187			sp|Q9Z0P4|PALM_MOUSE	Palm	18	36	110000000	0.22			sp|P28663|SNAB_MOUSE	Napb	20	44	50000000	0.12			sp|P51150|RAB7A_MOUSE	Rab7a	13	17	32000000	0.1		sp|Q91ZR1|RAB4B_MOUSE	Rab4b
	sp|Q3UPL0|SC31A_MOUSE	Sec31a	6	8	1100000	0.00627			sp|Q9DB05|SNAA_MOUSE	Napa	7	9	5300000	0.0133			sp|Q9Z1N5|DX39B_MOUSE	Ddx39b	7	9	4500000	0.0179			sp|Q80TZ3|AUXI_MOUSE	Dnajc6	18	32	39000000	0.0736			sp|Q8K0T0|RTN1_MOUSE	Rtn1	20	36	43000000	0.0996			sp|P37040|NCPR_MOUSE	Por	13	16	6400000	0.0203		sp|Q9DAW9|CNN3_MOUSE	Cnn3
	sp|P70297|STAM1_MOUSE	Stam	6	8	840000	0.00497			sp|P62962|PROF1_MOUSE	Pfn1	7	9	6100000	0.0154			sp|P62962|PROF1_MOUSE	Pfn1	7	9	5100000	0.02			sp|Q9ES97|RTN3_MOUSE	Rtn3	18	26	27000000	0.0516			sp|Q99P72|RTN4_MOUSE	Rtn4	20	30	11000000	0.0243			sp|Q80U56|AVL9_MOUSE	Avl9	13	16	2900000	0.00924		sp|P24270|CATA_MOUSE	Cat
	sp|Q6PHS9|CA2D2_MOUSE	Cacna2d2	6	8	1400000	0.00808			sp|Q921H8|THIKA_MOUSE	Acaa1a	7	9	1100000	0.00285			sp|Q99PT1|GDIR1_MOUSE	Arhgdia	7	9	3200000	0.0129			sp|Q64521|GPDM_MOUSE	Gpd2	18	21	8900000	0.0169			sp|Q64521|GPDM_MOUSE	Gpd2	20	28	11000000	0.0252			sp|O08917|FLOT1_MOUSE	Flot1	13	15	6300000	0.0202		sp|Q922P8|T132A_MOUSE	Tmem132a
	sp|Q922S4|PDE2A_MOUSE	Pde2a	6	8	590000	0.00348			sp|Q9CX34|SGT1_MOUSE	Sugt1	7	8	3300000	0.00836			sp|Q8VE33|GD1L1_MOUSE	Gdap1l1	7	9	5500000	0.0218			sp|Q6GQT9|NOMO1_MOUSE	Nomo1	18	20	8500000	0.0162			sp|P60879|SNP25_MOUSE	Snap25	19	39	79000000	0.18			sp|P43406|ITAV_MOUSE	Itgav	13	15	4800000	0.0153		sp|P18052|PTPRA_MOUSE	Ptpra
	sp|Q9CQD1|RAB5A_MOUSE	Rab5a	6	8	660000	0.00388			sp|Q9QYE6|GOGA5_MOUSE	Golga5	7	8	860000	0.00217			sp|P12787|COX5A_MOUSE	Cox5a	7	9	8200000	0.0325			sp|P28663|SNAB_MOUSE	Napb	17	47	48000000	0.0921			sp|Q99KN9|EPN4_MOUSE	Clint1	19	34	40000000	0.0917			sp|P27612|PLAP_MOUSE	Plaa	13	14	3100000	0.00979		sp|Q8BHZ0|FA49A_MOUSE	Fam49a
	sp|Q8R1N4|NUDC3_MOUSE	Nudcd3	6	8	300000	0.0018			sp|P23506|PIMT_MOUSE	Pcmt1	7	8	4300000	0.0108			sp|P15532|NDKA_MOUSE	Nme1	7	9	3400000	0.0134			sp|Q99KN9|EPN4_MOUSE	Clint1	17	39	52000000	0.0997			sp|P97792|CXAR_MOUSE	Cxadr	19	33	83000000	0.19			sp|P54763|EPHB2_MOUSE	Ephb2	13	14	5200000	0.0167		sp|P54728|RD23B_MOUSE	Rad23b
	sp|Q99LX0|PARK7_MOUSE	Park7	6	8	970000	0.00575			sp|Q7TSK3|PCDH8_MOUSE	Pcdh8	7	8	1100000	0.00276			sp|Q6P069|SORCN_MOUSE	Sri	7	9	990000	0.00391			sp|P10852|4F2_MOUSE	Slc3a2	17	37	100000000	0.2			sp|Q8BFU3|RN214_MOUSE	Rnf214	19	31	19000000	0.0427			sp|Q99P72|RTN4_MOUSE	Rtn4	13	14	4200000	0.0134		sp|Q05920|PYC_MOUSE	Pc
	sp|P61161|ARP2_MOUSE	Actr2	6	8	2700000	0.0159			sp|Q8CFE4|SCYL2_MOUSE	Scyl2	7	8	2200000	0.00547			sp|Q80UU9|PGRC2_MOUSE	Pgrmc2	7	8	1500000	0.00614			sp|Q8BJI1|S6A17_MOUSE	Slc6a17	17	33	57000000	0.11			sp|Q80U56|AVL9_MOUSE	Avl9	19	23	5200000	0.012			sp|Q9Z1L5|CA2D3_MOUSE	Cacna2d3	13	14	4600000	0.0146		sp|Q8BXR1|S7A14_MOUSE	Slc7a14
	sp|P05132|KAPCA_MOUSE	Prkaca	6	8	1100000	0.00629			sp|Q8VE33|GD1L1_MOUSE	Gdap1l1	7	8	8900000	0.0223			sp|Q8CAY6|THIC_MOUSE	Acat2	7	8	900000	0.00359			sp|Q810U3|NFASC_MOUSE	Nfasc	17	18	18000000	0.0336			sp|P58252|EF2_MOUSE	Eef2	19	23	10000000	0.0233			sp|Q91YQ5|RPN1_MOUSE	Rpn1	13	14	12000000	0.0389		sp|Q62165|DAG1_MOUSE	Dag1
	sp|Q60864|STIP1_MOUSE	Stip1	6	8	1300000	0.00785			sp|Q99L47|F10A1_MOUSE	St13	7	8	9100000	0.0228			sp|Q61553|FSCN1_MOUSE	Fscn1	7	8	2400000	0.00943			sp|P68369|TBA1A_MOUSE	Tuba1a	16	81	1100000000	2.01			sp|Q9QYE6|GOGA5_MOUSE	Golga5	19	21	7200000	0.0166			sp|P23819|GRIA2_MOUSE	Gria2	13	13	3200000	0.0101		sp|P70297|STAM1_MOUSE	Stam
	sp|Q8R3V5|SHLB2_MOUSE	Sh3glb2	6	8	1000000	0.00608			sp|Q8R570|SNP47_MOUSE	Snap47	7	8	1700000	0.00426			sp|P51906|EAA3_MOUSE	Slc1a1	7	8	1400000	0.00572			sp|Q9Z1G3|VATC1_MOUSE	Atp6v1c1	16	29	38000000	0.0732			sp|Q60902|EP15R_MOUSE	Eps15l1	19	19	7600000	0.0174			sp|Q91XV3|BASP1_MOUSE	Basp1	12	121	180000000	0.58		sp|P52480|KPYM_MOUSE	Pkm
	sp|Q8CHG3|GCC2_MOUSE	Gcc2	6	7	300000	0.00176			sp|Q9CRY7|GDPD1_MOUSE	Gdpd1	7	8	2300000	0.00588			sp|Q921M7|FA49B_MOUSE	Fam49b	7	8	4200000	0.0166			sp|Q9CQF9|PCYOX_MOUSE	Pcyox1	16	27	26000000	0.0493			sp|P18872|GNAO_MOUSE	Gnao1	18	72	320000000	0.74			sp|P26645|MARCS_MOUSE	Marcks	12	63	25000000	0.0788		sp|Q8K135|K319L_MOUSE	Kiaa0319l
	sp|Q6PIE5|AT1A2_MOUSE	Atp1a2	6	7	21000000	0.12			sp|Q8K400|STXB5_MOUSE	Stxbp5	7	8	2500000	0.00637			sp|Q61598|GDIB_MOUSE	Gdi2	7	8	2500000	0.0099			sp|D3Z7P3|GLSK_MOUSE	Gls	16	26	15000000	0.0279			sp|Q02819|NUCB1_MOUSE	Nucb1	18	29	22000000	0.0509			sp|P63011|RAB3A_MOUSE	Rab3a	12	58	530000000	1.68		sp|Q62108|DLG4_MOUSE	Dlg4
	sp|P61922|GABT_MOUSE	Abat	6	6	360000	0.00216			sp|Q00493|CBPE_MOUSE	Cpe	7	8	4200000	0.0106			sp|P61294|RAB6B_MOUSE	Rab6b	7	8	3800000	0.0151			sp|Q5SV85|SYNRG_MOUSE	Synrg	16	18	18000000	0.0346			sp|P68369|TBA1A_MOUSE	Tuba1a	17	74	910000000	2.1			sp|P46638|RB11B_MOUSE	Rab11b	12	31	90000000	0.29		sp|Q03517|SCG2_MOUSE	Scg2
	sp|Q9CQN1|TRAP1_MOUSE	Trap1	6	6	560000	0.0033			sp|Q5SRX1|TM1L2_MOUSE	Tom1l2	7	7	2100000	0.00525			sp|P52480|KPYM_MOUSE	Pkm	7	8	1900000	0.00761			sp|Q6P5E4|UGGG1_MOUSE	Uggt1	16	16	5500000	0.0104			sp|P51863|VA0D1_MOUSE	Atp6v0d1	17	43	270000000	0.62			sp|Q8BGZ1|HPCL4_MOUSE	Hpcal4	12	29	22000000	0.0691		sp|Q60597|ODO1_MOUSE	Ogdh
	sp|Q8C3W1|CA198_MOUSE		6	6	430000	0.00253			sp|P29758|OAT_MOUSE	Oat	7	7	2000000	0.00513			tr|Q91VA7|Q91VA7_MOUSE	Idh3b	7	8	670000	0.00265			sp|P06837|NEUM_MOUSE	Gap43	15	191	610000000	1.17			sp|P10852|4F2_MOUSE	Slc3a2	17	35	72000000	0.17			sp|P18242|CATD_MOUSE	Ctsd	12	26	67000000	0.21		sp|O70252|HMOX2_MOUSE	Hmox2
	sp|Q9Z0E0|NCDN_MOUSE	Ncdn	6	6	490000	0.00289			sp|P47754|CAZA2_MOUSE	Capza2	7	7	2500000	0.00622			sp|Q9D1T0|LIGO1_MOUSE	Lingo1	7	8	3300000	0.0132			sp|Q62277|SYPH_MOUSE	Syp	15	98	1800000000	3.52			sp|Q80TZ3|AUXI_MOUSE	Dnajc6	17	28	30000000	0.0699			sp|P62259|1433E_MOUSE	Ywhae	12	25	26000000	0.0844		sp|P12367|KAP2_MOUSE	Prkar2a
	sp|Q8CHU3|EPN2_MOUSE	Epn2	6	6	420000	0.00246			sp|Q8K009|AL1L2_MOUSE	Aldh1l2	7	7	960000	0.00242			sp|Q9CRY7|GDPD1_MOUSE	Gdpd1	7	7	1700000	0.0066			sp|Q8BG39|SV2B_MOUSE	Sv2b	15	64	520000000	0.99			sp|Q9Z1G3|VATC1_MOUSE	Atp6v1c1	17	28	33000000	0.0757			sp|Q9WTR5|CAD13_MOUSE	Cdh13	12	25	49000000	0.16		sp|Q5SRX1|TM1L2_MOUSE	Tom1l2
	sp|P01865|GCAM_MOUSE	Igh-1a	6	6	690000	0.00409			sp|Q8K2Q9|SHOT1_MOUSE	Shtn1	7	7	940000	0.00236			sp|Q99KJ8|DCTN2_MOUSE	Dctn2	7	7	1000000	0.00405			sp|Q60932|VDAC1_MOUSE	Vdac1	15	60	570000000	1.09			sp|D3Z7P3|GLSK_MOUSE	Gls	17	27	11000000	0.0256			sp|Q9D6R2|IDH3A_MOUSE	Idh3a	12	25	26000000	0.0824		sp|O88307|SORL_MOUSE	Sorl1
	sp|P16056|MET_MOUSE	Met	6	6	290000	0.00169			sp|Q91YJ2|SNX4_MOUSE	Snx4	7	7	700000	0.00175			sp|P23506|PIMT_MOUSE	Pcmt1	7	7	1800000	0.00718			sp|Q9CWF2|TBB2B_MOUSE	Tubb2b	15	60	270000000	0.52			tr|A1L3P4|A1L3P4_MOUSE	Slc9a6	17	22	25000000	0.0572			sp|P08249|MDHM_MOUSE	Mdh2	12	24	60000000	0.19		sp|P22892|AP1G1_MOUSE	Ap1g1
	IGKC_MOUSE		5	112	370000000	2.19			sp|Q6NZC7|S23IP_MOUSE	Sec23ip	7	7	900000	0.00226			tr|Q8CFX3|Q8CFX3_MOUSE	Pcdh1	7	7	650000	0.00258			sp|Q99J85|NPTXR_MOUSE	Nptxr	15	26	37000000	0.0697			sp|Q9Z0R4|ITSN1_MOUSE	Itsn1	17	20	8000000	0.0185			sp|P07901|HS90A_MOUSE	Hsp90aa1	12	23	12000000	0.038		sp|P97798|NEO1_MOUSE	Neo1
	sp|Q99PJ0|NTRI_MOUSE	Ntm	5	34	21000000	0.12			sp|O54734|OST48_MOUSE	Ddost	7	7	3900000	0.00985			sp|Q921H8|THIKA_MOUSE	Acaa1a	7	7	880000	0.0035			sp|P07901|HS90A_MOUSE	Hsp90aa1	15	26	25000000	0.0474			sp|P97807|FUMH_MOUSE	Fh	17	19	7300000	0.0169			sp|Q60598|SRC8_MOUSE	Cttn	12	22	24000000	0.0759		sp|Q61301|CTNA2_MOUSE	Ctnna2
	sp|P18572|BASI_MOUSE	Bsg	5	21	9100000	0.0537			tr|Q80U83|Q80U83_MOUSE	Sec24c	7	7	1500000	0.0038			sp|P43406|ITAV_MOUSE	Itgav	7	7	920000	0.00366			sp|P58252|EF2_MOUSE	Eef2	15	22	7300000	0.0139			sp|Q810U3|NFASC_MOUSE	Nfasc	17	17	12000000	0.0276			sp|P16858|G3P_MOUSE	Gapdh	12	20	35000000	0.11		sp|A2A8L5|PTPRF_MOUSE	Ptprf
	sp|P97765|WBP2_MOUSE	Wbp2	5	19	2800000	0.0168			sp|Q99LI8|HGS_MOUSE	Hgs	7	7	2100000	0.0054			sp|P20357|MTAP2_MOUSE	Map2	7	7	320000	0.00126			sp|Q02819|NUCB1_MOUSE	Nucb1	15	22	15000000	0.0293			sp|Q9JIS5|SV2A_MOUSE	Sv2a	16	99	650000000	1.5			sp|Q3UHL1|CAMKV_MOUSE	Camkv	12	19	9300000	0.0297		sp|P23818|GRIA1_MOUSE	Gria1
	sp|Q9CQV8|1433B_MOUSE	Ywhab	5	19	2200000	0.0132			sp|P62874|GBB1_MOUSE	Gnb1	6	54	430000000	1.08			sp|Q9D074|MGRN1_MOUSE	Mgrn1	7	7	460000	0.00181			sp|Q9Z0R4|ITSN1_MOUSE	Itsn1	15	18	10000000	0.019			sp|Q62277|SYPH_MOUSE	Syp	16	73	1400000000	3.34			sp|Q69ZK9|NLGN2_MOUSE	Nlgn2	12	18	8300000	0.0266		sp|Q9QZM0|UBQL2_MOUSE	Ubqln2
	sp|P84075|HPCA_MOUSE	Hpca	5	18	22000000	0.13			sp|Q9CQV8|1433B_MOUSE	Ywhab	6	20	4700000	0.0119			sp|P16056|MET_MOUSE	Met	7	7	750000	0.00297			sp|P16056|MET_MOUSE	Met	15	17	13000000	0.024			sp|Q9CWF2|TBB2B_MOUSE	Tubb2b	16	57	280000000	0.64			sp|Q8BXN9|TM87A_MOUSE	Tmem87a	12	17	11000000	0.0359		sp|Q8BNY6|NCS1_MOUSE	Ncs1
	sp|Q61735|CD47_MOUSE	Cd47	5	17	7600000	0.0451			sp|P17156|HSP72_MOUSE	Hspa2	6	20	120000000	0.3			sp|P62874|GBB1_MOUSE	Gnb1	6	46	240000000	0.93			tr|Q8CFX3|Q8CFX3_MOUSE	Pcdh1	15	15	7300000	0.0139			sp|Q8K596|NAC2_MOUSE	Slc8a2	16	21	16000000	0.0367			sp|P61922|GABT_MOUSE	Abat	12	17	8600000	0.0274		sp|Q9ER00|STX12_MOUSE	Stx12
	sp|Q8K021|SCAM1_MOUSE	Scamp1	5	17	4100000	0.0242			sp|Q62277|SYPH_MOUSE	Syp	6	20	140000000	0.35			sp|Q9CQV8|1433B_MOUSE	Ywhab	6	18	2800000	0.0113			sp|P51863|VA0D1_MOUSE	Atp6v0d1	14	41	290000000	0.54			sp|Q9DBG3|AP2B1_MOUSE	Ap2b1	16	18	4000000	0.00922			sp|Q8K596|NAC2_MOUSE	Slc8a2	12	16	11000000	0.0338		sp|Q6PHU5|SORT_MOUSE	Sort1
	sp|P68254|1433T_MOUSE	Ywhaq	5	16	3300000	0.0196			sp|P61089|UBE2N_MOUSE	Ube2n	6	17	29000000	0.0724			sp|Q9CQC9|SAR1B_MOUSE	Sar1b	6	17	4200000	0.0166			sp|P97807|FUMH_MOUSE	Fh	14	18	7400000	0.0141			sp|O08917|FLOT1_MOUSE	Flot1	16	17	6300000	0.0146			sp|P58252|EF2_MOUSE	Eef2	12	16	5500000	0.0175		sp|Q8C0L0|TMX4_MOUSE	Tmx4
	sp|Q60931|VDAC3_MOUSE	Vdac3	5	16	15000000	0.0912			sp|Q8VEH3|ARL8A_MOUSE	Arl8a	6	16	18000000	0.0446			sp|Q8VEH3|ARL8A_MOUSE	Arl8a	6	16	11000000	0.0434			tr|A1L3P4|A1L3P4_MOUSE	Slc9a6	14	18	25000000	0.0485			sp|Q8BG39|SV2B_MOUSE	Sv2b	15	54	320000000	0.73			sp|Q9DBG6|RPN2_MOUSE	Rpn2	12	14	4300000	0.0137		sp|O54734|OST48_MOUSE	Ddost
	sp|P61294|RAB6B_MOUSE	Rab6b	5	16	3500000	0.0206			sp|B2RSH2|GNAI1_MOUSE	Gnai1	6	16	24000000	0.0611			sp|P61089|UBE2N_MOUSE	Ube2n	6	16	21000000	0.0824			sp|Q91YQ5|RPN1_MOUSE	Rpn1	14	18	14000000	0.0266			sp|P84084|ARF5_MOUSE	Arf5	15	52	420000000	0.97			sp|Q04447|KCRB_MOUSE	Ckb	12	14	57000000	0.18		sp|Q6PDL0|DC1L2_MOUSE	Dync1li2
	sp|P70296|PEBP1_MOUSE	Pebp1	5	16	6500000	0.0387			sp|P61027|RAB10_MOUSE	Rab10	6	15	97000000	0.24			sp|Q60931|VDAC3_MOUSE	Vdac3	6	14	22000000	0.0859			sp|Q9QYE6|GOGA5_MOUSE	Golga5	14	17	7000000	0.0134			sp|Q9Z0P4|PALM_MOUSE	Palm	15	30	83000000	0.19			sp|Q9D051|ODPB_MOUSE	Pdhb	12	14	7200000	0.0229		sp|O70439|STX7_MOUSE	Stx7
	sp|P99024|TBB5_MOUSE	Tubb5	5	15	14000000	0.0802			sp|P18572|BASI_MOUSE	Bsg	6	14	15000000	0.0384			sp|P51863|VA0D1_MOUSE	Atp6v0d1	6	14	16000000	0.0644			sp|Q9Z1L5|CA2D3_MOUSE	Cacna2d3	14	16	12000000	0.0228			sp|Q9WTR5|CAD13_MOUSE	Cdh13	15	27	80000000	0.19			sp|Q8R5M8|CADM1_MOUSE	Cadm1	12	14	10000000	0.0326		sp|P17182|ENOA_MOUSE	Eno1
	sp|Q9CR95|NECP1_MOUSE	Necap1	5	14	5000000	0.0295			sp|P17742|PPIA_MOUSE	Ppia	6	14	36000000	0.0911			sp|P14094|AT1B1_MOUSE	Atp1b1	6	13	34000000	0.14			sp|Q80TJ1|CAPS1_MOUSE	Cadps	14	16	3900000	0.00739			sp|P63082|VATL_MOUSE	Atp6v0c	15	27	20000000	0.0457			sp|Q60634|FLOT2_MOUSE	Flot2	12	13	6000000	0.0193		sp|Q9D8Y0|EFHD2_MOUSE	Efhd2
	sp|Q8VEH3|ARL8A_MOUSE	Arl8a	5	13	8600000	0.0508			sp|O08749|DLDH_MOUSE	Dld	6	13	6400000	0.0161			sp|P68510|1433F_MOUSE	Ywhah	6	13	3900000	0.0153			sp|Q9EPN1|NBEA_MOUSE	Nbea	14	15	2800000	0.00542			sp|Q8BJI1|S6A17_MOUSE	Slc6a17	15	27	33000000	0.0755			sp|P80314|TCPB_MOUSE	Cct2	12	12	3800000	0.0121		sp|Q8BK64|AHSA1_MOUSE	Ahsa1
	sp|P68510|1433F_MOUSE	Ywhah	5	12	3900000	0.023			sp|Q8BIF0|C99L2_MOUSE	Cd99l2	6	12	6100000	0.0154			sp|O08749|DLDH_MOUSE	Dld	6	11	3500000	0.0138			sp|Q80XR2|AT2C1_MOUSE	Atp2c1	14	14	7500000	0.0142			sp|Q6Q477|AT2B4_MOUSE	Atp2b4	15	27	83000000	0.19			sp|Q8BH66|ATLA1_MOUSE	Atl1	12	12	4300000	0.0136		sp|Q8BLF1|NCEH1_MOUSE	Nceh1
	sp|P61082|UBC12_MOUSE	Ube2m	5	12	3900000	0.0229			sp|Q9CQC9|SAR1B_MOUSE	Sar1b	6	12	4200000	0.0107			sp|Q8BIF0|C99L2_MOUSE	Cd99l2	6	11	2400000	0.00945			sp|Q9DBG6|RPN2_MOUSE	Rpn2	14	14	6500000	0.0124			sp|O35927|CTND2_MOUSE	Ctnnd2	15	21	4100000	0.00951			sp|Q61739|ITA6_MOUSE	Itga6	12	12	2200000	0.00693		sp|Q8BLQ9|CADM2_MOUSE	Cadm2
	sp|O08749|DLDH_MOUSE	Dld	5	11	860000	0.00507			sp|Q9R257|HEBP1_MOUSE	Hebp1	6	11	21000000	0.0517			sp|P97765|WBP2_MOUSE	Wbp2	6	11	3100000	0.0123			sp|P54763|EPHB2_MOUSE	Ephb2	14	14	8700000	0.0165			sp|P40142|TKT_MOUSE	Tkt	15	18	11000000	0.0253			sp|Q80TJ1|CAPS1_MOUSE	Cadps	12	12	2500000	0.00808		sp|Q8C7K6|PCYXL_MOUSE	Pcyox1l
	sp|Q8VDW0|DX39A_MOUSE	Ddx39a	5	11	2400000	0.014			sp|P51863|VA0D1_MOUSE	Atp6v0d1	6	11	16000000	0.0408			sp|Q61171|PRDX2_MOUSE	Prdx2	6	11	5700000	0.0225			sp|Q91XV3|BASP1_MOUSE	Basp1	13	149	680000000	1.3			sp|Q9D051|ODPB_MOUSE	Pdhb	15	17	12000000	0.0279			sp|Q07113|MPRI_MOUSE	Igf2r	12	12	2100000	0.00668		sp|Q9JKK1|STX6_MOUSE	Stx6
	sp|Q6PDM2|SRSF1_MOUSE	Srsf1	5	11	2000000	0.0115			sp|P31648|SC6A1_MOUSE	Slc6a1	6	10	17000000	0.043			sp|P99029|PRDX5_MOUSE	Prdx5	6	10	17000000	0.0656			sp|P84084|ARF5_MOUSE	Arf5	13	45	310000000	0.58			sp|Q9EPN1|NBEA_MOUSE	Nbea	15	17	2200000	0.00517			sp|Q8BG39|SV2B_MOUSE	Sv2b	11	44	160000000	0.51		tr|Q91VA7|Q91VA7_MOUSE	Idh3b
	sp|Q62393|TPD52_MOUSE	Tpd52	5	10	710000	0.00417			sp|P54728|RD23B_MOUSE	Rad23b	6	10	7800000	0.0196			sp|Q9QYI5|DNJB2_MOUSE	Dnajb2	6	10	3000000	0.012			sp|P31324|KAP3_MOUSE	Prkar2b	13	36	27000000	0.0522			sp|Q9CS84|NRX1A_MOUSE	Nrxn1	15	16	6100000	0.0141			sp|P43006|EAA2_MOUSE	Slc1a2	11	39	43000000	0.14		sp|Q9CX34|SGT1_MOUSE	Sugt1
	sp|Q6ZQI3|MLEC_MOUSE	Mlec	5	10	1300000	0.00777			sp|O88643|PAK1_MOUSE	Pak1	6	10	2100000	0.00537			sp|P31650|S6A11_MOUSE	Slc6a11	6	10	7400000	0.0294			sp|Q99JP7|GGT7_MOUSE	Ggt7	13	34	61000000	0.12			sp|Q60932|VDAC1_MOUSE	Vdac1	14	49	440000000	1.02			sp|P51863|VA0D1_MOUSE	Atp6v0d1	11	39	210000000	0.68		sp|Q9ERE7|MESD_MOUSE	Mesdc2
	sp|Q9D7N9|APMAP_MOUSE	Apmap	5	10	2300000	0.0137			sp|Q99KF1|TMED9_MOUSE	Tmed9	6	10	11000000	0.0278			sp|P35278|RAB5C_MOUSE	Rab5c	6	9	4900000	0.0195			sp|Q9WTR5|CAD13_MOUSE	Cdh13	13	26	100000000	0.19			sp|P18242|CATD_MOUSE	Ctsd	14	34	110000000	0.24			sp|Q91V41|RAB14_MOUSE	Rab14	11	31	78000000	0.25		sp|Q6PHS9|CA2D2_MOUSE	Cacna2d2
	sp|P62835|RAP1A_MOUSE	Rap1a	5	10	2600000	0.0153			sp|Q9DC16|ERGI1_MOUSE	Ergic1	6	10	7700000	0.0194			sp|Q6ZQI3|MLEC_MOUSE	Mlec	6	9	2300000	0.00923			sp|Q60598|SRC8_MOUSE	Cttn	13	26	77000000	0.15			sp|Q99JP7|GGT7_MOUSE	Ggt7	14	31	37000000	0.0851			sp|Q9CQW2|ARL8B_MOUSE	Arl8b	11	25	66000000	0.21		sp|P47867|SCG3_MOUSE	Scg3
	sp|Q80UU9|PGRC2_MOUSE	Pgrmc2	5	9	1200000	0.00711			sp|Q91VR2|ATPG_MOUSE	Atp5c1	6	10	11000000	0.0274			sp|Q9WV55|VAPA_MOUSE	Vapa	6	9	1900000	0.00761			sp|Q8BFU3|RN214_MOUSE	Rnf214	13	25	30000000	0.0571			sp|P62259|1433E_MOUSE	Ywhae	14	28	35000000	0.0812			sp|Q9EPJ9|ARFG1_MOUSE	Arfgap1	11	24	14000000	0.0459		sp|Q9QUR8|SEM7A_MOUSE	Sema7a
	sp|P12367|KAP2_MOUSE	Prkar2a	5	9	1300000	0.0074			sp|P31650|S6A11_MOUSE	Slc6a11	6	10	12000000	0.0299			sp|Q8K021|SCAM1_MOUSE	Scamp1	6	9	7400000	0.0295			sp|P63082|VATL_MOUSE	Atp6v0c	13	20	19000000	0.0356			sp|Q9ET30|TM9S3_MOUSE	Tm9sf3	14	26	25000000	0.0586			sp|Q99JP7|GGT7_MOUSE	Ggt7	11	21	17000000	0.054		sp|P61161|ARP2_MOUSE	Actr2
	sp|P97825|JUPI1_MOUSE	JPT1	5	9	1500000	0.00896			sp|P68254|1433T_MOUSE	Ywhaq	6	9	6100000	0.0153			sp|Q99KF1|TMED9_MOUSE	Tmed9	6	9	5100000	0.0204			sp|P50518|VATE1_MOUSE	Atp6v1e1	13	20	85000000	0.16			sp|P07901|HS90A_MOUSE	Hsp90aa1	14	25	19000000	0.0448			sp|Q99J85|NPTXR_MOUSE	Nptxr	11	17	14000000	0.0451		sp|Q61627|GRID1_MOUSE	Grid1
	sp|Q9CPQ3|TOM22_MOUSE	Tomm22	5	9	510000	0.00302			sp|P08752|GNAI2_MOUSE	Gnai2	6	9	4500000	0.0112			sp|Q9CR95|NECP1_MOUSE	Necap1	6	9	8300000	0.0329			sp|Q8R5M8|CADM1_MOUSE	Cadm1	13	20	27000000	0.0506			sp|P51150|RAB7A_MOUSE	Rab7a	14	22	42000000	0.0972			sp|P05202|AATM_MOUSE	Got2	11	17	25000000	0.0799		sp|Q9WV34|MPP2_MOUSE	Mpp2
	sp|Q99NB8|UBQL4_MOUSE	Ubqln4	5	9	1100000	0.00628			sp|P59279|RAB2B_MOUSE	Rab2b	6	9	18000000	0.0443			sp|P08226|APOE_MOUSE	Apoe	6	9	4100000	0.0163			sp|Q9D6R2|IDH3A_MOUSE	Idh3a	13	20	24000000	0.046			sp|Q99J85|NPTXR_MOUSE	Nptxr	14	22	19000000	0.0427			sp|Q61490|CD166_MOUSE	Alcam	11	16	13000000	0.0406		sp|Q9Z1R2|BAG6_MOUSE	Bag6
	sp|Q99PT1|GDIR1_MOUSE	Arhgdia	5	9	2100000	0.0126			sp|Q9D1D4|TMEDA_MOUSE	Tmed10	6	9	6700000	0.0168			sp|O88643|PAK1_MOUSE	Pak1	6	8	950000	0.00375			sp|Q8K596|NAC2_MOUSE	Slc8a2	13	18	25000000	0.0477			sp|Q8BYI8|F234B_MOUSE	Fam234b	14	20	13000000	0.0311			sp|Q9JKF6|NECT1_MOUSE	Nectin1	11	15	5700000	0.0183		sp|B2RXS4|PLXB2_MOUSE	Plxnb2
	sp|P97450|ATP5J_MOUSE	Atp5j	5	9	4500000	0.0264			sp|Q9Z1G3|VATC1_MOUSE	Atp6v1c1	6	9	7100000	0.018			sp|Q9R0P9|UCHL1_MOUSE	Uchl1	6	8	3300000	0.013			sp|Q8K2B3|SDHA_MOUSE	Sdha	13	18	19000000	0.0354			sp|P37040|NCPR_MOUSE	Por	14	19	7200000	0.0165			sp|P26443|DHE3_MOUSE	Glud1	11	15	4300000	0.0136		sp|P09411|PGK1_MOUSE	Pgk1
	sp|Q9CXW3|CYBP_MOUSE	Cacybp	5	9	500000	0.00298			sp|Q9R1J0|NSDHL_MOUSE	Nsdhl	6	9	3200000	0.00802			sp|P18052|PTPRA_MOUSE	Ptpra	6	8	920000	0.00366			sp|P09103|PDIA1_MOUSE	P4hb	13	17	6900000	0.0131			sp|Q9EQH3|VPS35_MOUSE	Vps35	14	17	8400000	0.0193			sp|P57746|VATD_MOUSE	Atp6v1d	11	14	14000000	0.0443		sp|Q8BFZ9|ERLN2_MOUSE	Erlin2
	sp|Q9CZT8|RAB3B_MOUSE	Rab3b	5	8	900000	0.00534			sp|P97450|ATP5J_MOUSE	Atp5j	6	9	11000000	0.0265			sp|P10649|GSTM1_MOUSE	Gstm1	6	8	3500000	0.014			sp|O08917|FLOT1_MOUSE	Flot1	13	16	7300000	0.014			sp|Q9Z1L5|CA2D3_MOUSE	Cacna2d3	14	17	8500000	0.0197			sp|P50396|GDIA_MOUSE	Gdi1	11	13	4200000	0.0135		sp|P70168|IMB1_MOUSE	Kpnb1
	sp|P08752|GNAI2_MOUSE	Gnai2	5	8	2400000	0.0143			sp|P17182|ENOA_MOUSE	Eno1	6	9	3400000	0.00858			sp|P61211|ARL1_MOUSE	Arl1	6	8	2100000	0.00852			sp|P40142|TKT_MOUSE	Tkt	13	16	12000000	0.0223			sp|Q91YQ5|RPN1_MOUSE	Rpn1	14	16	8500000	0.0195			sp|Q61879|MYH10_MOUSE	Myh10	11	13	2400000	0.00759		sp|P98156|VLDLR_MOUSE	Vldlr
	sp|P62962|PROF1_MOUSE	Pfn1	5	8	3700000	0.0217			sp|P48318|DCE1_MOUSE	Gad1	6	8	2600000	0.00645			sp|Q9DBH5|LMAN2_MOUSE	Lman2	6	8	3900000	0.0154			sp|Q80VP0|TCPR1_MOUSE	Tecpr1	13	16	4400000	0.00841			sp|Q8K1M6|DNM1L_MOUSE	Dnm1l	14	15	3900000	0.00909			sp|Q00493|CBPE_MOUSE	Cpe	11	13	8100000	0.0259		sp|P28658|ATX10_MOUSE	Atxn10
	sp|P19783|COX41_MOUSE	Cox4i1	5	8	8000000	0.0476			sp|P51906|EAA3_MOUSE	Slc1a1	6	8	3200000	0.00809			sp|P57716|NICA_MOUSE	Ncstn	6	8	1600000	0.00637			sp|Q8K1M6|DNM1L_MOUSE	Dnm1l	13	15	3600000	0.00684			sp|P80314|TCPB_MOUSE	Cct2	14	15	5400000	0.0124			sp|Q60902|EP15R_MOUSE	Eps15l1	11	12	3800000	0.0122		sp|P47738|ALDH2_MOUSE	Aldh2
	sp|Q8BLQ9|CADM2_MOUSE	Cadm2	5	8	1600000	0.00945			sp|P61922|GABT_MOUSE	Abat	6	8	1500000	0.00382			sp|Q9D7N9|APMAP_MOUSE	Apmap	6	8	1900000	0.00755			sp|P08003|PDIA4_MOUSE	Pdia4	13	15	8600000	0.0163			sp|P16056|MET_MOUSE	Met	14	15	5300000	0.0123			sp|Q80V26|IMPA3_MOUSE	Impad1	11	12	10000000	0.0332		tr|B1AWN6|B1AWN6_MOUSE	Scn2a
	sp|Q9QYI3|DNJC7_MOUSE	Dnajc7	5	8	460000	0.00273			sp|Q3UYC0|PPM1H_MOUSE	Ppm1h	6	8	2600000	0.00647			sp|Q6ZQA6|IGSF3_MOUSE	Igsf3	6	8	860000	0.00339			sp|Q9D051|ODPB_MOUSE	Pdhb	13	15	11000000	0.0202			sp|P06837|NEUM_MOUSE	Gap43	13	134	410000000	0.95			tr|A1L3P4|A1L3P4_MOUSE	Slc9a6	11	12	9100000	0.0291		sp|P80560|PTPR2_MOUSE	Ptprn2
	sp|Q99J85|NPTXR_MOUSE	Nptxr	5	8	2500000	0.0146			sp|Q01405|SC23A_MOUSE	Sec23a	6	8	1400000	0.00364			sp|P60335|PCBP1_MOUSE	Pcbp1	6	8	910000	0.00362			sp|Q6ZQA6|IGSF3_MOUSE	Igsf3	13	13	5900000	0.0111			sp|Q91XV3|BASP1_MOUSE	Basp1	13	123	660000000	1.52			sp|Q8R570|SNP47_MOUSE	Snap47	11	12	4200000	0.0133		sp|Q91VD9|NDUS1_MOUSE	Ndufs1
	sp|O35136|NCAM2_MOUSE	Ncam2	5	8	760000	0.00447			sp|Q91XL9|OSBL1_MOUSE	Osbpl1a	6	8	3400000	0.00858			sp|Q01405|SC23A_MOUSE	Sec23a	6	7	1200000	0.00476			sp|P62821|RAB1A_MOUSE	Rab1A	12	40	280000000	0.54			sp|P26645|MARCS_MOUSE	Marcks	13	46	40000000	0.093			sp|Q8K0U4|HS12A_MOUSE	Hspa12a	11	11	3600000	0.0113		sp|Q99PU5|ACBG1_MOUSE	Acsbg1
	sp|Q9QY76|VAPB_MOUSE	Vapb	5	8	1100000	0.00674			sp|Q9Z1N5|DX39B_MOUSE	Ddx39b	6	8	4200000	0.0107			sp|O08795|GLU2B_MOUSE	Prkcsh	6	7	2000000	0.00809			sp|P08249|MDHM_MOUSE	Mdh2	12	27	68000000	0.13			sp|P62821|RAB1A_MOUSE	Rab1A	13	42	180000000	0.41			sp|P39053|DYN1_MOUSE	Dnm1	11	11	17000000	0.0551		sp|P20357|MTAP2_MOUSE	Map2
	sp|P35700|PRDX1_MOUSE	Prdx1	5	8	2400000	0.0142			sp|Q9ERT9|PPR1A_MOUSE	Ppp1r1a	6	8	3500000	0.00876			sp|Q64010|CRK_MOUSE	Crk	6	7	990000	0.00392			sp|Q61490|CD166_MOUSE	Alcam	12	21	27000000	0.0505			sp|P08249|MDHM_MOUSE	Mdh2	13	30	98000000	0.23			sp|P16056|MET_MOUSE	Met	11	11	2600000	0.0083		sp|P63101|1433Z_MOUSE	Ywhaz
	tr|Q9Z1A1|Q9Z1A1_MOUSE	Tfg	5	7	1200000	0.00692			sp|P12787|COX5A_MOUSE	Cox5a	6	8	8700000	0.022			sp|P50518|VATE1_MOUSE	Atp6v1e1	6	7	2200000	0.00879			sp|P51150|RAB7A_MOUSE	Rab7a	12	19	46000000	0.0879			sp|P50518|VATE1_MOUSE	Atp6v1e1	13	21	54000000	0.13			sp|O55042|SYUA_MOUSE	Snca	10	122	1500000000	4.84		sp|Q8BLK3|LSAMP_MOUSE	Lsamp
	sp|Q8BIF0|C99L2_MOUSE	Cd99l2	5	7	870000	0.00517			sp|Q8BXN9|TM87A_MOUSE	Tmem87a	6	8	1800000	0.00456			sp|Q9ER00|STX12_MOUSE	Stx12	6	7	3400000	0.0134			sp|Q9DCX2|ATP5H_MOUSE	Atp5h	12	19	19000000	0.0368			sp|P09103|PDIA1_MOUSE	P4hb	13	20	11000000	0.0254			sp|P54227|STMN1_MOUSE	Stmn1	10	60	190000000	0.6		sp|P61027|RAB10_MOUSE	Rab10
	sp|Q8BW96|KCC1D_MOUSE	Camk1d	5	7	720000	0.00423			sp|P61294|RAB6B_MOUSE	Rab6b	6	8	5500000	0.0138			tr|Q0VGU4|Q0VGU4_MOUSE	Vgf	6	7	1200000	0.00477			sp|Q9R1Q9|VAS1_MOUSE	Atp6ap1	12	19	84000000	0.16			sp|Q9CQQ7|AT5F1_MOUSE	Atp5f1	13	20	15000000	0.0347			sp|P62821|RAB1A_MOUSE	Rab1A	10	30	140000000	0.44		sp|P35803|GPM6B_MOUSE	Gpm6b
	sp|Q9CR68|UCRI_MOUSE	Uqcrfs1	5	7	3200000	0.0191			sp|P62823|RAB3C_MOUSE	Rab3c	6	7	4400000	0.0112			sp|P47754|CAZA2_MOUSE	Capza2	6	7	1600000	0.00653			sp|Q69ZK9|NLGN2_MOUSE	Nlgn2	12	18	25000000	0.047			sp|Q61490|CD166_MOUSE	Alcam	13	20	20000000	0.0457			sp|Q9CQW1|YKT6_MOUSE	Ykt6	10	27	48000000	0.15		sp|P62823|RAB3C_MOUSE	Rab3c
	sp|P10649|GSTM1_MOUSE	Gstm1	5	7	610000	0.00363			tr|Q9Z1A1|Q9Z1A1_MOUSE	Tfg	6	7	4800000	0.0121			sp|O35685|NUDC_MOUSE	Nudc	6	7	1100000	0.00419			sp|P05202|AATM_MOUSE	Got2	12	18	38000000	0.0726			sp|Q9ERB0|SNP29_MOUSE	Snap29	13	17	13000000	0.0295			sp|P31324|KAP3_MOUSE	Prkar2b	10	21	16000000	0.0519		sp|O55022|PGRC1_MOUSE	Pgrmc1
	sp|Q6PDL0|DC1L2_MOUSE	Dync1li2	5	7	2000000	0.0116			sp|Q921M7|FA49B_MOUSE	Fam49b	6	7	4300000	0.0108			tr|Q80U83|Q80U83_MOUSE	Sec24c	6	7	680000	0.0027			sp|Q8BXN9|TM87A_MOUSE	Tmem87a	12	18	20000000	0.0372			sp|Q9Z2I9|SUCB1_MOUSE	Sucla2	13	16	6500000	0.015			sp|Q61792|LASP1_MOUSE	Lasp1	10	18	21000000	0.0675		sp|Q8K2K6|AGFG1_MOUSE	Agfg1
	sp|P28658|ATX10_MOUSE	Atxn10	5	7	240000	0.00139			sp|Q7M6Y3|PICAL_MOUSE	Picalm	6	7	3500000	0.00867			sp|Q8BR92|PALM2_MOUSE	Palm2	6	7	1400000	0.00554			sp|Q9CWZ7|SNAG_MOUSE	Napg	12	18	27000000	0.0513			sp|Q9WU78|PDC6I_MOUSE	Pdcd6ip	13	15	7000000	0.0163			sp|Q9ET30|TM9S3_MOUSE	Tm9sf3	10	17	17000000	0.0555		sp|Q99N28|CADM3_MOUSE	Cadm3
	sp|Q8BK64|AHSA1_MOUSE	Ahsa1	5	7	1600000	0.00967			sp|P32037|GTR3_MOUSE	Slc2a3	6	7	5000000	0.0126			sp|Q62108|DLG4_MOUSE	Dlg4	6	7	4600000	0.0182			sp|Q9Z2G6|SE1L1_MOUSE	Sel1l	12	16	6600000	0.0125			sp|Q80V26|IMPA3_MOUSE	Impad1	13	15	17000000	0.0391			sp|P63082|VATL_MOUSE	Atp6v0c	10	15	13000000	0.0413		sp|Q7TN29|SMAP2_MOUSE	Smap2
	sp|P61021|RAB5B_MOUSE	Rab5b	5	7	4100000	0.0245			tr|Q8C048|Q8C048_MOUSE	Atp2b3	6	7	6800000	0.0172			sp|P06151|LDHA_MOUSE	Ldha	6	7	3700000	0.0148			sp|P14733|LMNB1_MOUSE	Lmnb1	12	15	4900000	0.00927			sp|P97467|AMD_MOUSE	Pam	13	15	5200000	0.0121			sp|Q9DCL9|PUR6_MOUSE	Paics	10	15	8000000	0.0257		sp|P60904|DNJC5_MOUSE	Dnajc5
	sp|P10126|EF1A1_MOUSE	Eef1a1	5	7	940000	0.00557			sp|Q64010|CRK_MOUSE	Crk	6	7	1300000	0.00332			sp|Q6PHS9|CA2D2_MOUSE	Cacna2d2	6	7	2700000	0.0106			sp|Q8BH66|ATLA1_MOUSE	Atl1	12	15	7700000	0.0147			sp|P08003|PDIA4_MOUSE	Pdia4	13	14	6000000	0.0138			sp|Q9R1Q9|VAS1_MOUSE	Atp6ap1	10	15	27000000	0.085		sp|Q9DB20|ATPO_MOUSE	Atp5o
	sp|P63005|LIS1_MOUSE	Pafah1b1	5	7	2500000	0.0148			sp|Q9CR68|UCRI_MOUSE	Uqcrfs1	6	7	5000000	0.0126			sp|Q8K009|AL1L2_MOUSE	Aldh1l2	6	7	790000	0.00312			sp|Q9EQH3|VPS35_MOUSE	Vps35	12	15	9500000	0.0181			sp|Q6ZQA6|IGSF3_MOUSE	Igsf3	13	14	4600000	0.0105			sp|Q9DCN2|NB5R3_MOUSE	Cyb5r3	10	14	12000000	0.0392		sp|P00405|COX2_MOUSE	Mtco2
	sp|Q99KF1|TMED9_MOUSE	Tmed9	5	7	1700000	0.0103			sp|Q8C3W1|CA198_MOUSE		6	7	1300000	0.00322			sp|P32020|NLTP_MOUSE	Scp2	6	7	2100000	0.00832			sp|Q8BXR1|S7A14_MOUSE	Slc7a14	12	14	13000000	0.0238			sp|P43406|ITAV_MOUSE	Itgav	13	14	4400000	0.0101			sp|Q6PHU5|SORT_MOUSE	Sort1	10	14	8800000	0.0281		sp|P19783|COX41_MOUSE	Cox4i1
	sp|Q9D1G1|RAB1B_MOUSE	Rab1b	5	6	2000000	0.0117			sp|Q9R1Q9|VAS1_MOUSE	Atp6ap1	6	7	3900000	0.00972			sp|Q61187|TS101_MOUSE	Tsg101	6	7	1500000	0.0061			sp|Q9DCL9|PUR6_MOUSE	Paics	12	14	9500000	0.0181			sp|Q9DBG6|RPN2_MOUSE	Rpn2	13	13	5500000	0.0126			sp|Q9JKK1|STX6_MOUSE	Stx6	10	13	6500000	0.0209		sp|P21279|GNAQ_MOUSE	Gnaq
	sp|Q91VD9|NDUS1_MOUSE	Ndufs1	5	6	430000	0.00254			sp|Q9QYF9|NDRG3_MOUSE	Ndrg3	6	7	4400000	0.0111			sp|Q9CS84|NRX1A_MOUSE	Nrxn1	6	7	1200000	0.00473			sp|P26443|DHE3_MOUSE	Glud1	12	14	5600000	0.0106			sp|Q8R5M8|CADM1_MOUSE	Cadm1	12	22	16000000	0.0361			sp|P24270|CATA_MOUSE	Cat	10	13	4300000	0.0136		sp|O08749|DLDH_MOUSE	Dld
	sp|Q6KAU4|MB12B_MOUSE	Mvb12b	5	6	420000	0.00246			sp|Q62393|TPD52_MOUSE	Tpd52	6	7	1500000	0.00371			sp|Q8K2Q9|SHOT1_MOUSE	Shtn1	6	7	450000	0.0018			sp|Q8BTS4|NUP54_MOUSE	Nup54	12	13	5500000	0.0105			sp|Q9CWZ7|SNAG_MOUSE	Napg	12	21	36000000	0.0828			sp|Q7TQF7|AMPH_MOUSE	Amph	10	12	3000000	0.00954		sp|Q9DAM7|TM263_MOUSE	Tmem263
	sp|Q8R5M8|CADM1_MOUSE	Cadm1	5	6	1400000	0.00848			sp|Q6P6J9|TXD15_MOUSE	Txndc15	6	7	1900000	0.00473			sp|Q9QXS6|DREB_MOUSE	Dbn1	6	6	910000	0.00361			sp|P43406|ITAV_MOUSE	Itgav	12	13	5400000	0.0103			sp|Q9EPJ9|ARFG1_MOUSE	Arfgap1	12	20	18000000	0.0423			sp|Q60864|STIP1_MOUSE	Stip1	10	12	4000000	0.0129		sp|Q63850|NUP62_MOUSE	Nup62
	sp|Q9QXS6|DREB_MOUSE	Dbn1	5	6	640000	0.0038			sp|Q91V12|BACH_MOUSE	Acot7	6	7	2800000	0.00699			sp|P58021|TM9S2_MOUSE	Tm9sf2	6	6	1100000	0.00425			sp|Q6ZQ38|CAND1_MOUSE	Cand1	12	13	2200000	0.00425			sp|Q60598|SRC8_MOUSE	Cttn	12	19	37000000	0.085			sp|Q810U3|NFASC_MOUSE	Nfasc	10	11	4600000	0.0148		sp|Q8R191|SNG3_MOUSE	Syngr3
	sp|P06151|LDHA_MOUSE	Ldha	5	6	800000	0.00475			sp|P47738|ALDH2_MOUSE	Aldh2	6	7	1000000	0.00255			sp|Q3UPL0|SC31A_MOUSE	Sec31a	6	6	1400000	0.00558			sp|Q61301|CTNA2_MOUSE	Ctnna2	12	12	3300000	0.00633			sp|Q9D6R2|IDH3A_MOUSE	Idh3a	12	19	36000000	0.0833			sp|Q7TSK3|PCDH8_MOUSE	Pcdh8	10	11	1700000	0.00529		sp|Q99KF1|TMED9_MOUSE	Tmed9
	sp|O35927|CTND2_MOUSE	Ctnnd2	5	6	270000	0.0016			sp|Q9ERE7|MESD_MOUSE	Mesdc2	6	7	2600000	0.00651			sp|Q8BYM5|NLGN3_MOUSE	Nlgn3	6	6	1400000	0.00557			sp|Q61699|HS105_MOUSE	Hsph1	12	12	7300000	0.014			sp|P61294|RAB6B_MOUSE	Rab6b	12	18	22000000	0.0503			sp|Q61553|FSCN1_MOUSE	Fscn1	10	11	3800000	0.012		sp|Q6R0H7|GNAS1_MOUSE	Gnas
	sp|Q9WV34|MPP2_MOUSE	Mpp2	5	6	630000	0.00371			sp|Q62165|DAG1_MOUSE	Dag1	6	7	1100000	0.00286			sp|Q99L47|F10A1_MOUSE	St13	6	6	1900000	0.00759			sp|P39053|DYN1_MOUSE	Dnm1	12	12	30000000	0.058			sp|Q7TQF7|AMPH_MOUSE	Amph	12	17	6000000	0.0139			sp|Q76MZ3|2AAA_MOUSE	Ppp2r1a	10	11	3300000	0.0105		sp|Q61553|FSCN1_MOUSE	Fscn1
	sp|P29758|OAT_MOUSE	Oat	5	6	430000	0.00253			sp|O88447|KLC1_MOUSE	Klc1	6	7	930000	0.00234			sp|Q8BW96|KCC1D_MOUSE	Camk1d	6	6	2400000	0.00947			sp|P63011|RAB3A_MOUSE	Rab3a	11	61	1100000000	2.1			sp|Q8BXN9|TM87A_MOUSE	Tmem87a	12	17	14000000	0.0316			sp|P53810|PIPNA_MOUSE	Pitpna	10	11	6500000	0.0207		sp|P32037|GTR3_MOUSE	Slc2a3
	sp|Q9R0P9|UCHL1_MOUSE	Uchl1	5	6	810000	0.0048			sp|P06151|LDHA_MOUSE	Ldha	6	7	5100000	0.0128			sp|P70168|IMB1_MOUSE	Kpnb1	6	6	640000	0.00253			sp|P26645|MARCS_MOUSE	Marcks	11	38	43000000	0.0821			sp|Q80TJ1|CAPS1_MOUSE	Cadps	12	15	3400000	0.00796			sp|Q02053|UBA1_MOUSE	Uba1	10	10	3800000	0.0122		sp|Q8BYM5|NLGN3_MOUSE	Nlgn3
	sp|Q8BM72|HSP13_MOUSE	Hspa13	5	6	690000	0.0041			sp|Q60634|FLOT2_MOUSE	Flot2	6	7	2400000	0.00595			sp|P29758|OAT_MOUSE	Oat	6	6	1600000	0.00651			sp|Q8VEK0|CC50A_MOUSE	Tmem30a	11	30	30000000	0.057			sp|Q8K135|K319L_MOUSE	Kiaa0319l	12	15	8800000	0.0203			sp|P18052|PTPRA_MOUSE	Ptpra	10	10	2400000	0.00756		sp|Q3UYC0|PPM1H_MOUSE	Ppm1h
	sp|Q8R317|UBQL1_MOUSE	Ubqln1	5	6	1100000	0.00643			sp|Q8R3V5|SHLB2_MOUSE	Sh3glb2	6	7	3900000	0.00977			sp|Q91XL9|OSBL1_MOUSE	Osbpl1a	6	6	1400000	0.00541			sp|Q9ET30|TM9S3_MOUSE	Tm9sf3	11	29	22000000	0.0416			sp|Q9DCL9|PUR6_MOUSE	Paics	12	14	10000000	0.024			sp|Q9Z2I9|SUCB1_MOUSE	Sucla2	10	10	3500000	0.0113		sp|Q9Z1N5|DX39B_MOUSE	Ddx39b
	sp|P47738|ALDH2_MOUSE	Aldh2	5	6	390000	0.00231			sp|Q9ER00|STX12_MOUSE	Stx12	6	6	1200000	0.00306			sp|Q9EPN1|NBEA_MOUSE	Nbea	6	6	330000	0.0013			sp|Q9CQW2|ARL8B_MOUSE	Arl8b	11	28	91000000	0.17			sp|O35454|CLCN6_MOUSE	Clcn6	12	13	3600000	0.0084			sp|Q62108|DLG4_MOUSE	Dlg4	10	10	2800000	0.00903		sp|Q8BH24|TM9S4_MOUSE	Tm9sf4
	sp|O70252|HMOX2_MOUSE	Hmox2	5	6	310000	0.00183			sp|P58021|TM9S2_MOUSE	Tm9sf2	6	6	1100000	0.0027			sp|P09411|PGK1_MOUSE	Pgk1	6	6	1000000	0.00409			sp|P46638|RB11B_MOUSE	Rab11b	11	28	140000000	0.26			sp|Q922P8|T132A_MOUSE	Tmem132a	12	12	3700000	0.00861			sp|P97300|NPTN_MOUSE	Nptn	9	24	92000000	0.29		sp|Q91XL9|OSBL1_MOUSE	Osbpl1a
	sp|Q76MZ3|2AAA_MOUSE	Ppp2r1a	5	6	1000000	0.00595			sp|Q61036|PAK3_MOUSE	Pak3	6	6	760000	0.0019			sp|Q8K221|ARFP2_MOUSE	Arfip2	6	6	1000000	0.00395			sp|Q3UHL1|CAMKV_MOUSE	Camkv	11	27	30000000	0.0568			sp|Q8K400|STXB5_MOUSE	Stxbp5	12	12	4600000	0.0107			sp|Q8K021|SCAM1_MOUSE	Scamp1	9	22	56000000	0.18		sp|Q9D7N9|APMAP_MOUSE	Apmap
	sp|Q99JP7|GGT7_MOUSE	Ggt7	5	6	600000	0.00357			sp|Q8C7E9|CSTFT_MOUSE	Cstf2t	6	6	810000	0.00205			sp|P12367|KAP2_MOUSE	Prkar2a	6	6	1500000	0.00609			sp|P18242|CATD_MOUSE	Ctsd	11	27	100000000	0.19			sp|P43006|EAA2_MOUSE	Slc1a2	11	34	62000000	0.14			sp|Q9ER00|STX12_MOUSE	Stx12	9	18	25000000	0.0784		sp|Q8R3V5|SHLB2_MOUSE	Sh3glb2
	sp|Q9CX00|IST1_MOUSE	Ist1	5	6	540000	0.00317			sp|Q8K2C7|OS9_MOUSE	Os9	6	6	1300000	0.0032			sp|Q8BX94|OSBL2_MOUSE	Osbpl2	6	6	1200000	0.00484			sp|P16858|G3P_MOUSE	Gapdh	11	23	40000000	0.0764			sp|Q9CQW1|YKT6_MOUSE	Ykt6	11	29	46000000	0.11			sp|Q9QZM0|UBQL2_MOUSE	Ubqln2	9	17	20000000	0.0638		tr|Q9Z1A1|Q9Z1A1_MOUSE	Tfg
	sp|O54865|GCYB1_MOUSE	Gucy1b3	5	6	440000	0.00262			sp|Q9CPW0|CNTP2_MOUSE	Cntnap2	6	6	860000	0.00217			sp|Q62165|DAG1_MOUSE	Dag1	6	6	840000	0.00334			sp|Q9CQW1|YKT6_MOUSE	Ykt6	11	23	68000000	0.13			sp|P31324|KAP3_MOUSE	Prkar2b	11	27	25000000	0.0584			sp|Q9CZ13|QCR1_MOUSE	Uqcrc1	9	16	15000000	0.0491		sp|Q8VE33|GD1L1_MOUSE	Gdap1l1
	sp|Q60597|ODO1_MOUSE	Ogdh	5	6	240000	0.00139			sp|D3YZP9|CCDC6_MOUSE	Ccdc6	6	6	1300000	0.00328			sp|P19096|FAS_MOUSE	Fasn	6	6	510000	0.002			sp|Q62433|NDRG1_MOUSE	Ndrg1	11	18	10000000	0.0191			sp|Q8BGZ1|HPCL4_MOUSE	Hpcal4	11	23	33000000	0.0763			sp|P57759|ERP29_MOUSE	Erp29	9	16	9900000	0.0317		sp|Q9CRY7|GDPD1_MOUSE	Gdpd1
	sp|P09411|PGK1_MOUSE	Pgk1	5	6	470000	0.00277			sp|Q8BH24|TM9S4_MOUSE	Tm9sf4	6	6	1900000	0.00483			sp|Q9JLB9|NECT3_MOUSE	Nectin3	6	6	1300000	0.00511			sp|Q9JKF6|NECT1_MOUSE	Nectin1	11	16	16000000	0.0297			sp|Q9DCX2|ATP5H_MOUSE	Atp5h	11	20	22000000	0.0511			sp|Q8BNY6|NCS1_MOUSE	Ncs1	9	16	16000000	0.0519		sp|P29758|OAT_MOUSE	Oat
	sp|Q9QZ06|TOLIP_MOUSE	Tollip	5	6	580000	0.00342			sp|Q9QYA2|TOM40_MOUSE	Tomm40	6	6	3000000	0.00744			sp|Q9CYH2|F213A_MOUSE	Fam213a	6	6	890000	0.00352			sp|Q91ZR1|RAB4B_MOUSE	Rab4b	11	16	28000000	0.0535			sp|Q3UHL1|CAMKV_MOUSE	Camkv	11	19	14000000	0.0332			sp|Q99KW9|TIP_MOUSE	Itfg1	9	16	11000000	0.0357		sp|Q9QYA2|TOM40_MOUSE	Tomm40
	sp|Q61187|TS101_MOUSE	Tsg101	5	6	620000	0.00368			sp|Q9D5V6|SYAP1_MOUSE	Syap1	6	6	1000000	0.00255			sp|Q9DC16|ERGI1_MOUSE	Ergic1	6	6	2200000	0.00867			sp|Q922S4|PDE2A_MOUSE	Pde2a	11	15	6600000	0.0125			sp|P16858|G3P_MOUSE	Gapdh	11	19	34000000	0.0778			sp|P35278|RAB5C_MOUSE	Rab5c	9	14	15000000	0.049		sp|Q921H8|THIKA_MOUSE	Acaa1a
	sp|P35293|RAB18_MOUSE	Rab18	5	6	1400000	0.00813			sp|P43406|ITAV_MOUSE	Itgav	6	6	850000	0.00214			sp|Q99PJ0|NTRI_MOUSE	Ntm	5	26	32000000	0.13			sp|Q80V26|IMPA3_MOUSE	Impad1	11	15	14000000	0.0261			sp|Q8K2B3|SDHA_MOUSE	Sdha	11	18	19000000	0.0428			sp|Q922R8|PDIA6_MOUSE	Pdia6	9	14	15000000	0.0493		sp|Q8BW96|KCC1D_MOUSE	Camk1d
	sp|Q9CYH2|F213A_MOUSE	Fam213a	5	6	660000	0.00392			sp|Q61627|GRID1_MOUSE	Grid1	6	6	750000	0.00189			sp|P17156|HSP72_MOUSE	Hspa2	5	22	59000000	0.23			sp|Q6NXK7|DPP10_MOUSE	Dpp10	11	14	14000000	0.027			sp|P05202|AATM_MOUSE	Got2	11	17	39000000	0.0909			sp|Q91ZR1|RAB4B_MOUSE	Rab4b	9	14	16000000	0.0523		sp|O08795|GLU2B_MOUSE	Prkcsh
	sp|Q8BVQ5|PPME1_MOUSE	Ppme1	5	6	440000	0.00259			sp|Q8VIM9|IRGQ_MOUSE	Irgq	6	6	1700000	0.0042			sp|P99024|TBB5_MOUSE	Tubb5	5	19	19000000	0.0755			sp|Q9ERB0|SNP29_MOUSE	Snap29	11	13	11000000	0.0201			sp|Q922S4|PDE2A_MOUSE	Pde2a	11	16	4800000	0.0111			sp|Q62433|NDRG1_MOUSE	Ndrg1	9	13	4400000	0.0141		sp|P05132|KAPCA_MOUSE	Prkaca
	sp|P15532|NDKA_MOUSE	Nme1	5	6	490000	0.00289			sp|Q09143|CTR1_MOUSE	Slc7a1	6	6	1900000	0.00475			sp|B2RSH2|GNAI1_MOUSE	Gnai1	5	13	14000000	0.0568			sp|Q9CS84|NRX1A_MOUSE	Nrxn1	11	13	7700000	0.0146			sp|Q8BXR1|S7A14_MOUSE	Slc7a14	11	15	7900000	0.0182			sp|Q99KF1|TMED9_MOUSE	Tmed9	9	13	12000000	0.0385		sp|P06151|LDHA_MOUSE	Ldha
	sp|Q9Z2G6|SE1L1_MOUSE	Sel1l	5	5	400000	0.00238			sp|Q61411|RASH_MOUSE	Hras	6	6	2300000	0.00583			sp|P59279|RAB2B_MOUSE	Rab2b	5	12	10000000	0.04			sp|P61922|GABT_MOUSE	Abat	11	12	4900000	0.00924			sp|Q62433|NDRG1_MOUSE	Ndrg1	11	15	8600000	0.0198			sp|O70439|STX7_MOUSE	Stx7	9	12	11000000	0.0356		sp|Q8K221|ARFP2_MOUSE	Arfip2
	sp|Q922P8|T132A_MOUSE	Tmem132a	5	5	360000	0.00213			sp|P15116|CADH2_MOUSE	Cdh2	6	6	1200000	0.00311			sp|P68254|1433T_MOUSE	Ywhaq	5	11	4700000	0.0188			sp|O35136|NCAM2_MOUSE	Ncam2	11	12	9100000	0.0174			sp|P61922|GABT_MOUSE	Abat	11	15	11000000	0.0252			sp|Q80VP0|TCPR1_MOUSE	Tecpr1	9	12	2800000	0.00896		sp|Q99KJ8|DCTN2_MOUSE	Dctn2
	sp|Q9JKK1|STX6_MOUSE	Stx6	5	5	330000	0.00198			sp|P97798|NEO1_MOUSE	Neo1	6	6	710000	0.00178			sp|P84075|HPCA_MOUSE	Hpca	5	11	47000000	0.19			sp|A2A8L5|PTPRF_MOUSE	Ptprf	11	12	2400000	0.00463			sp|Q8BH66|ATLA1_MOUSE	Atl1	11	14	5900000	0.0136			sp|P62748|HPCL1_MOUSE	Hpcal1	9	12	6300000	0.0201		sp|Q8C3W1|CA198_MOUSE
	sp|D3YZP9|CCDC6_MOUSE	Ccdc6	5	5	320000	0.00188			sp|Q6V4S5|SDK2_MOUSE	Sdk2	6	6	560000	0.0014			sp|Q9R257|HEBP1_MOUSE	Hebp1	5	10	19000000	0.0765			sp|Q07113|MPRI_MOUSE	Igf2r	11	12	4100000	0.00779			sp|Q69ZK9|NLGN2_MOUSE	Nlgn2	11	14	12000000	0.0277			sp|P21278|GNA11_MOUSE	Gna11	9	12	12000000	0.0397		sp|Q60629|EPHA5_MOUSE	Epha5
	sp|Q9D5V6|SYAP1_MOUSE	Syap1	5	5	230000	0.00135			sp|Q99LP6|GRPE1_MOUSE	Grpel1	6	6	1100000	0.0028			sp|P53994|RAB2A_MOUSE	Rab2a	5	10	9000000	0.0357			sp|P58281|OPA1_MOUSE	Opa1	11	12	2900000	0.0055			sp|Q80VP0|TCPR1_MOUSE	Tecpr1	11	14	2500000	0.00567			sp|Q9DB05|SNAA_MOUSE	Napa	9	11	6900000	0.022		sp|O54865|GCYB1_MOUSE	Gucy1b3
	sp|Q8CFE4|SCYL2_MOUSE	Scyl2	5	5	450000	0.00264			sp|Q61187|TS101_MOUSE	Tsg101	6	6	20000000	0.0511			sp|Q62048|PEA15_MOUSE	Pea15	5	10	3500000	0.0137			sp|Q7TSK3|PCDH8_MOUSE	Pcdh8	11	11	3900000	0.00745			sp|Q6P9K9|NRX3A_MOUSE	Nrxn3	11	14	3200000	0.00744			sp|Q6R0H7|GNAS1_MOUSE	Gnas	9	11	5300000	0.0168		sp|Q3UZV7|K132L_MOUSE
	sp|Q8BGQ7|SYAC_MOUSE	Aars	5	5	200000	0.00121			sp|O88935|SYN1_MOUSE	Syn1	6	6	1500000	0.00375			sp|Q9WV27|AT1A4_MOUSE	Atp1a4	5	10	16000000	0.0621			sp|Q8R570|SNP47_MOUSE	Snap47	11	11	3900000	0.00747			sp|Q00493|CBPE_MOUSE	Cpe	11	14	16000000	0.0379			sp|P32037|GTR3_MOUSE	Slc2a3	9	10	8300000	0.0266		sp|P10630|IF4A2_MOUSE	Eif4a2
	sp|P46096|SYT1_MOUSE	Syt1	5	5	480000	0.00285			sp|P39688|FYN_MOUSE	Fyn	6	6	1300000	0.0032			sp|Q9CZY3|UB2V1_MOUSE	Ube2v1	5	10	110000000	0.46			sp|Q6P9K9|NRX3A_MOUSE	Nrxn3	11	11	5000000	0.00947			sp|Q8C129|LCAP_MOUSE	Lnpep	11	13	3000000	0.00697			sp|Q8K135|K319L_MOUSE	Kiaa0319l	9	10	4200000	0.0133		sp|Q9Z110|P5CS_MOUSE	Aldh18a1
	sp|Q9CRY7|GDPD1_MOUSE	Gdpd1	5	5	650000	0.00386			sp|P35802|GPM6A_MOUSE	Gpm6a	5	31	130000000	0.34			sp|P28667|MRP_MOUSE	Marcksl1	5	9	6100000	0.0242			sp|Q9Z0H8|CLIP2_MOUSE	Clip2	11	11	5400000	0.0103			sp|Q7TSK3|PCDH8_MOUSE	Pcdh8	11	13	2400000	0.00562			sp|Q61411|RASH_MOUSE	Hras	9	10	6900000	0.0222		sp|O35643|AP1B1_MOUSE	Ap1b1
	sp|P08226|APOE_MOUSE	Apoe	5	5	760000	0.00449			sp|Q99PJ0|NTRI_MOUSE	Ntm	5	28	56000000	0.14			sp|P62331|ARF6_MOUSE	Arf6	5	9	5200000	0.0205			sp|P43006|EAA2_MOUSE	Slc1a2	10	32	61000000	0.12			sp|Q8JZP2|SYN3_MOUSE	Syn3	11	13	6000000	0.0138			sp|O35927|CTND2_MOUSE	Ctnnd2	9	10	670000	0.00213		sp|Q8BLE7|VGLU2_MOUSE	Slc17a6
	sp|P48318|DCE1_MOUSE	Gad1	5	5	560000	0.00332			sp|Q9Z127|LAT1_MOUSE	Slc7a5	5	21	19000000	0.0478			sp|P08752|GNAI2_MOUSE	Gnai2	5	8	2700000	0.0107			sp|P62823|RAB3C_MOUSE	Rab3c	10	29	170000000	0.32			sp|P26443|DHE3_MOUSE	Glud1	11	13	4700000	0.0108			tr|Q8C048|Q8C048_MOUSE	Atp2b3	9	9	2600000	0.0082		sp|Q3UHD6|SNX27_MOUSE	Snx27
	sp|Q9QYC0|ADDA_MOUSE	Add1	5	5	610000	0.00361			sp|O54901|OX2G_MOUSE	Cd200	5	21	81000000	0.2			sp|P97450|ATP5J_MOUSE	Atp5j	5	8	9000000	0.0358			sp|P97300|NPTN_MOUSE	Nptn	10	29	250000000	0.47			sp|Q02053|UBA1_MOUSE	Uba1	11	12	4100000	0.00954			sp|Q8BXZ1|TMX3_MOUSE	Tmx3	9	9	12000000	0.0368		sp|P35585|AP1M1_MOUSE	Ap1m1
	sp|Q9D1T0|LIGO1_MOUSE	Lingo1	5	5	1800000	0.0105			sp|P99024|TBB5_MOUSE	Tubb5	5	17	56000000	0.14			sp|Q91V41|RAB14_MOUSE	Rab14	5	8	7500000	0.0296			sp|P62259|1433E_MOUSE	Ywhae	10	21	24000000	0.0452			sp|P50396|GDIA_MOUSE	Gdi1	11	12	3300000	0.00763			sp|Q8JZP2|SYN3_MOUSE	Syn3	9	9	3500000	0.0113		sp|Q02248|CTNB1_MOUSE	Ctnnb1
	sp|P70168|IMB1_MOUSE	Kpnb1	5	5	350000	0.00206			sp|P19783|COX41_MOUSE	Cox4i1	5	13	20000000	0.0494			sp|Q9CQI6|COTL1_MOUSE	Cotl1	5	8	1500000	0.00604			sp|Q8BGZ1|HPCL4_MOUSE	Hpcal4	10	19	18000000	0.0346			sp|Q8VBZ3|CLPT1_MOUSE	Clptm1	11	12	5000000	0.0114			sp|Q6P9K9|NRX3A_MOUSE	Nrxn3	9	9	1600000	0.00501		sp|Q01853|TERA_MOUSE	Vcp
	sp|Q6PCP5|MFF_MOUSE	Mff	5	5	280000	0.00164			sp|P84075|HPCA_MOUSE	Hpca	5	12	39000000	0.0972			sp|Q9CPQ3|TOM22_MOUSE	Tomm22	5	7	1000000	0.00411			sp|Q9EPJ9|ARFG1_MOUSE	Arfgap1	10	18	17000000	0.0316			sp|Q9DB05|SNAA_MOUSE	Napa	11	11	6300000	0.0146			tr|Q8CFX3|Q8CFX3_MOUSE	Pcdh1	9	9	2000000	0.00632		sp|Q6V4S5|SDK2_MOUSE	Sdk2
	tr|Q99M55|Q99M55_MOUSE	Atp6v0a1	5	5	170000	0.00098			sp|P97797|SHPS1_MOUSE	Sirpa	5	11	19000000	0.0481			sp|P51880|FABP7_MOUSE	Fabp7	5	7	7700000	0.0306			sp|P21278|GNA11_MOUSE	Gna11	10	18	19000000	0.0354			sp|Q8K0U4|HS12A_MOUSE	Hspa12a	11	11	5400000	0.0124			sp|Q9D1T0|LIGO1_MOUSE	Lingo1	9	9	7600000	0.0243		sp|Q99PJ0|NTRI_MOUSE	Ntm
	tr|Q8C048|Q8C048_MOUSE	Atp2b3	5	5	700000	0.00413			tr|D3YZZ5|D3YZZ5_MOUSE	Tmed7	5	11	10000000	0.0255			sp|P61021|RAB5B_MOUSE	Rab5b	5	7	5000000	0.0198			sp|P57746|VATD_MOUSE	Atp6v1d	10	16	30000000	0.0567			sp|B0V2N1|PTPRS_MOUSE	Ptprs	11	11	3500000	0.00805			sp|P63101|1433Z_MOUSE	Ywhaz	8	33	89000000	0.28		sp|B2RSH2|GNAI1_MOUSE	Gnai1
	sp|P22892|AP1G1_MOUSE	Ap1g1	5	5	240000	0.00141			sp|Q9R0Q3|TMED2_MOUSE	Tmed2	5	11	1700000	0.00439			sp|Q9D164|FXYD6_MOUSE	Fxyd6	5	7	4500000	0.018			sp|Q8JZP2|SYN3_MOUSE	Syn3	10	16	8400000	0.0161			sp|O55042|SYUA_MOUSE	Snca	10	105	2200000000	5.08			sp|B2RSH2|GNAI1_MOUSE	Gnai1	8	30	61000000	0.19		sp|P14094|AT1B1_MOUSE	Atp1b1
	sp|Q9JLB0|MPP6_MOUSE	Mpp6	5	5	420000	0.00248			sp|Q99N28|CADM3_MOUSE	Cadm3	5	10	35000000	0.0874			sp|Q6P6J9|TXD15_MOUSE	Txndc15	5	7	980000	0.00388			sp|Q61553|FSCN1_MOUSE	Fscn1	10	14	8000000	0.0153			sp|P63011|RAB3A_MOUSE	Rab3a	10	60	770000000	1.78			sp|P61027|RAB10_MOUSE	Rab10	8	26	450000000	1.43		sp|Q8K021|SCAM1_MOUSE	Scamp1
	sp|Q9Z127|LAT1_MOUSE	Slc7a5	4	28	11000000	0.063			sp|Q9QYI5|DNJB2_MOUSE	Dnajb2	5	10	7300000	0.0183			sp|P21278|GNA11_MOUSE	Gna11	5	7	5300000	0.0212			sp|Q9D1T0|LIGO1_MOUSE	Lingo1	10	14	26000000	0.0488			sp|P61027|RAB10_MOUSE	Rab10	10	34	750000000	1.72			sp|Q8BLK3|LSAMP_MOUSE	Lsamp	8	25	31000000	0.0975		sp|Q91X97|NCALD_MOUSE	Ncald
	sp|P62983|RS27A_MOUSE	Rps27a	4	20	56000000	0.33			sp|P70296|PEBP1_MOUSE	Pebp1	5	10	12000000	0.0295			sp|Q9JK48|SHLB1_MOUSE	Sh3glb1	5	7	3400000	0.0134			sp|P37040|NCPR_MOUSE	Por	10	13	5600000	0.0107			sp|P62823|RAB3C_MOUSE	Rab3c	10	28	85000000	0.2			sp|P14094|AT1B1_MOUSE	Atp1b1	8	24	150000000	0.49		sp|P61089|UBE2N_MOUSE	Ube2n
	sp|O54901|OX2G_MOUSE	Cd200	4	20	21000000	0.12			sp|Q61553|FSCN1_MOUSE	Fscn1	5	9	3800000	0.0096			sp|Q8BM72|HSP13_MOUSE	Hspa13	5	7	1900000	0.00739			sp|Q8BYI8|F234B_MOUSE	Fam234b	10	13	12000000	0.0237			sp|P46638|RB11B_MOUSE	Rab11b	10	25	120000000	0.28			sp|P62823|RAB3C_MOUSE	Rab3c	8	20	56000000	0.18		sp|P63328|PP2BA_MOUSE	Ppp3ca
	sp|O70456|1433S_MOUSE	Sfn	4	18	29000000	0.17			sp|Q9D1G1|RAB1B_MOUSE	Rab1b	5	9	4600000	0.0116			sp|Q61627|GRID1_MOUSE	Grid1	5	7	570000	0.00225			sp|Q8BXZ1|TMX3_MOUSE	Tmx3	10	13	5600000	0.0107			sp|Q91V41|RAB14_MOUSE	Rab14	10	23	97000000	0.22			sp|Q60931|VDAC3_MOUSE	Vdac3	8	18	48000000	0.15		sp|P17742|PPIA_MOUSE	Ppia
	sp|Q91VZ6|SMAP1_MOUSE	Smap1	4	18	7900000	0.0469			sp|P11438|LAMP1_MOUSE	Lamp1	5	9	6100000	0.0154			sp|Q07076|ANXA7_MOUSE	Anxa7	5	7	4300000	0.0169			sp|P97467|AMD_MOUSE	Pam	10	13	7700000	0.0146			sp|Q8K2K6|AGFG1_MOUSE	Agfg1	10	19	13000000	0.0293			sp|P21279|GNAQ_MOUSE	Gnaq	8	18	20000000	0.0653		sp|Q9R0Q3|TMED2_MOUSE	Tmed2
	sp|P59279|RAB2B_MOUSE	Rab2b	4	17	14000000	0.0844			sp|P63005|LIS1_MOUSE	Pafah1b1	5	9	4500000	0.0114			sp|P58771|TPM1_MOUSE	Tpm1	5	7	1400000	0.00559			sp|Q9JKK1|STX6_MOUSE	Stx6	10	12	7500000	0.0142			sp|P21278|GNA11_MOUSE	Gna11	10	17	17000000	0.0403			sp|P60904|DNJC5_MOUSE	Dnajc5	8	18	53000000	0.17		sp|P0DP27|CALM2_MOUSE	Calm2
	sp|Q9Z1W8|AT12A_MOUSE	Atp12a	4	17	28000000	0.16			sp|P57716|NICA_MOUSE	Ncstn	5	9	3300000	0.00818			sp|P54728|RD23B_MOUSE	Rad23b	5	7	3500000	0.0139			sp|Q9DBG3|AP2B1_MOUSE	Ap2b1	10	12	3200000	0.00602			sp|Q9D1T0|LIGO1_MOUSE	Lingo1	10	15	14000000	0.0327			sp|Q91X97|NCALD_MOUSE	Ncald	8	17	40000000	0.13		sp|Q91VR2|ATPG_MOUSE	Atp5c1
	sp|Q05816|FABP5_MOUSE	Fabp5	4	16	5100000	0.0301			sp|P35486|ODPA_MOUSE	Pdha1	5	9	6100000	0.0154			sp|O35927|CTND2_MOUSE	Ctnnd2	5	7	310000	0.00124			sp|Q8R1Q8|DC1L1_MOUSE	Dync1li1	10	12	3700000	0.00697			sp|Q922R8|PDIA6_MOUSE	Pdia6	10	13	15000000	0.0346			sp|O55022|PGRC1_MOUSE	Pgrmc1	8	17	24000000	0.0775		sp|Q9D1D4|TMEDA_MOUSE	Tmed10
	sp|Q9CQX2|CYB5B_MOUSE	Cyb5b	4	15	6300000	0.0374			sp|P70206|PLXA1_MOUSE	Plxna1	5	9	4200000	0.0106			sp|Q8VHW2|CCG8_MOUSE	Cacng8	5	6	860000	0.0034			sp|Q00493|CBPE_MOUSE	Cpe	10	12	14000000	0.027			sp|Q80XR2|AT2C1_MOUSE	Atp2c1	10	12	4700000	0.0108			sp|P63328|PP2BA_MOUSE	Ppp3ca	8	15	19000000	0.0602		sp|P35278|RAB5C_MOUSE	Rab5c
	sp|P63044|VAMP2_MOUSE	Vamp2	4	14	20000000	0.12			sp|Q8BYM5|NLGN3_MOUSE	Nlgn3	5	8	3700000	0.00918			sp|Q8C3W1|CA198_MOUSE		5	6	700000	0.00277			sp|Q9JHZ2|ANKH_MOUSE	Ankh	10	12	4000000	0.00765			sp|Q8BH24|TM9S4_MOUSE	Tm9sf4	10	12	15000000	0.0345			sp|P00405|COX2_MOUSE	Mtco2	8	14	25000000	0.0787		sp|Q9D6F9|TBB4A_MOUSE	Tubb4a
	sp|Q8R464|CADM4_MOUSE	Cadm4	4	13	2900000	0.0171			sp|P21279|GNAQ_MOUSE	Gnaq	5	8	11000000	0.0284			sp|Q9QUR8|SEM7A_MOUSE	Sema7a	5	6	2800000	0.0109			sp|Q8K135|K319L_MOUSE	Kiaa0319l	10	12	7900000	0.0151			sp|Q9JHZ2|ANKH_MOUSE	Ankh	10	12	3800000	0.00882			sp|Q9JJY3|NSMA2_MOUSE	Smpd3	8	12	2900000	0.00922		sp|Q9JJY3|NSMA2_MOUSE	Smpd3
	sp|Q9DBH5|LMAN2_MOUSE	Lman2	4	13	1900000	0.0111			sp|Q8BFT9|SVOP_MOUSE	Svop	5	8	2800000	0.00714			sp|Q8R332|NUP58_MOUSE	Nup58	5	6	2300000	0.00917			sp|Q922P8|T132A_MOUSE	Tmem132a	10	11	4700000	0.00896			sp|Q6NXK7|DPP10_MOUSE	Dpp10	10	12	13000000	0.0295			sp|P61021|RAB5B_MOUSE	Rab5b	8	12	28000000	0.0886		sp|Q63810|CANB1_MOUSE	Ppp3r1
	sp|Q80Z24|NEGR1_MOUSE	Negr1	4	13	18000000	0.11			sp|Q8BM72|HSP13_MOUSE	Hspa13	5	8	5500000	0.0139			sp|P61979|HNRPK_MOUSE	Hnrnpk	5	6	910000	0.00359			sp|Q9QXS6|DREB_MOUSE	Dbn1	10	11	8800000	0.0168			sp|Q8R570|SNP47_MOUSE	Snap47	10	11	3400000	0.00783			sp|Q9DB20|ATPO_MOUSE	Atp5o	8	12	15000000	0.048		sp|P12787|COX5A_MOUSE	Cox5a
	sp|Q9QYI5|DNJB2_MOUSE	Dnajb2	4	12	3400000	0.0201			sp|Q9CR95|NECP1_MOUSE	Necap1	5	8	14000000	0.0355			sp|Q99JX3|GORS2_MOUSE	Gorasp2	5	6	1500000	0.00578			sp|O35454|CLCN6_MOUSE	Clcn6	10	11	5000000	0.00958			sp|O35136|NCAM2_MOUSE	Ncam2	10	11	6400000	0.0148			sp|Q91VR2|ATPG_MOUSE	Atp5c1	8	12	18000000	0.0569		sp|Q61411|RASH_MOUSE	Hras
	sp|Q9R257|HEBP1_MOUSE	Hebp1	4	11	4500000	0.0266			sp|Q6ZQI3|MLEC_MOUSE	Mlec	5	8	1700000	0.00429			sp|Q9CQD1|RAB5A_MOUSE	Rab5a	5	6	1800000	0.00695			sp|P80314|TCPB_MOUSE	Cct2	10	10	4700000	0.00904			sp|Q62108|DLG4_MOUSE	Dlg4	10	11	3500000	0.00819			sp|Q9CZ44|NSF1C_MOUSE	Nsfl1c	8	11	3700000	0.0118		sp|Q9DBH5|LMAN2_MOUSE	Lman2
	sp|B2RSH2|GNAI1_MOUSE	Gnai1	4	11	3600000	0.0211			sp|Q8K021|SCAM1_MOUSE	Scamp1	5	8	5300000	0.0133			sp|Q8C7K6|PCYXL_MOUSE	Pcyox1l	5	6	3100000	0.0122			sp|B0V2N1|PTPRS_MOUSE	Ptprs	10	10	4900000	0.00928			sp|Q9Z2G6|SE1L1_MOUSE	Sel1l	10	10	2500000	0.00582			sp|Q8R1Q8|DC1L1_MOUSE	Dync1li1	8	11	2400000	0.00776		sp|Q9QYF9|NDRG3_MOUSE	Ndrg3
	sp|Q9WV27|AT1A4_MOUSE	Atp1a4	4	11	19000000	0.11			sp|Q9ET30|TM9S3_MOUSE	Tm9sf3	5	8	2700000	0.00691			sp|Q9D1C8|VPS28_MOUSE	Vps28	5	6	1400000	0.00553			sp|P23818|GRIA1_MOUSE	Gria1	10	10	7800000	0.0149			sp|Q9CPW0|CNTP2_MOUSE	Cntnap2	10	10	2500000	0.00574			sp|Q8C7K6|PCYXL_MOUSE	Pcyox1l	8	11	8100000	0.0258		sp|P57716|NICA_MOUSE	Ncstn
	sp|Q62433|NDRG1_MOUSE	Ndrg1	4	10	920000	0.00546			sp|Q99PT1|GDIR1_MOUSE	Arhgdia	5	7	3000000	0.00764			sp|Q8K3C3|LZIC_MOUSE	Lzic	5	6	910000	0.00362			sp|O55042|SYUA_MOUSE	Snca	9	87	1900000000	3.54			sp|Q60634|FLOT2_MOUSE	Flot2	10	10	5800000	0.0134			sp|Q8BH24|TM9S4_MOUSE	Tm9sf4	8	11	12000000	0.0381		sp|P48318|DCE1_MOUSE	Gad1
	sp|Q9R0Y5|KAD1_MOUSE	Ak1	4	10	680000	0.00401			sp|P50518|VATE1_MOUSE	Atp6v1e1	5	7	6900000	0.0173			sp|Q61831|MK10_MOUSE	Mapk10	5	6	900000	0.00356			sp|P60904|DNJC5_MOUSE	Dnajc5	9	36	170000000	0.33			sp|Q8CIN4|PAK2_MOUSE	Pak2	10	10	3100000	0.00717			sp|Q6NXK7|DPP10_MOUSE	Dpp10	8	11	7900000	0.0254		sp|Q9CR68|UCRI_MOUSE	Uqcrfs1
	sp|Q9CQC9|SAR1B_MOUSE	Sar1b	4	10	800000	0.00474			sp|P32507|NECT2_MOUSE	Nectin2	5	7	1700000	0.00425			sp|Q64433|CH10_MOUSE	Hspe1	5	6	8000000	0.0316			sp|Q99PJ0|NTRI_MOUSE	Ntm	9	36	220000000	0.42			sp|Q91YJ2|SNX4_MOUSE	Snx4	10	10	2200000	0.00505			sp|Q9JKK7|TMOD2_MOUSE	Tmod2	8	10	9300000	0.0296		sp|Q7M6Y3|PICAL_MOUSE	Picalm
	sp|P43006|EAA2_MOUSE	Slc1a2	4	10	1100000	0.00633			sp|Q8VD37|SGIP1_MOUSE	Sgip1	5	7	1100000	0.00276			sp|P10126|EF1A1_MOUSE	Eef1a1	5	6	740000	0.00295			sp|B2RSH2|GNAI1_MOUSE	Gnai1	9	35	110000000	0.21			sp|P70175|DLG3_MOUSE	Dlg3	10	10	2500000	0.00588			sp|Q9QYF9|NDRG3_MOUSE	Ndrg3	8	10	4800000	0.0154		sp|Q9JK48|SHLB1_MOUSE	Sh3glb1
	sp|O88531|PPT1_MOUSE	Ppt1	4	9	5100000	0.0299			sp|Q9R0Y5|KAD1_MOUSE	Ak1	5	7	1600000	0.004			tr|Q3TU36|Q3TU36_MOUSE	Rap1gds1	5	6	580000	0.00228			sp|Q8BLK3|LSAMP_MOUSE	Lsamp	9	35	85000000	0.16			sp|Q8BL66|EEA1_MOUSE	Eea1	10	10	1400000	0.00327			sp|Q63850|NUP62_MOUSE	Nup62	8	10	9400000	0.0301		sp|P15532|NDKA_MOUSE	Nme1
	sp|P99027|RLA2_MOUSE	Rplp2	4	9	14000000	0.0828			sp|P08226|APOE_MOUSE	Apoe	5	7	3100000	0.00787			sp|Q99LX0|PARK7_MOUSE	Park7	5	6	1900000	0.00749			sp|P63101|1433Z_MOUSE	Ywhaz	9	24	130000000	0.24			sp|Q6PDS3|SARM1_MOUSE	Sarm1	10	10	1800000	0.0042			sp|Q9QUR8|SEM7A_MOUSE	Sema7a	8	10	2800000	0.00906		sp|P35486|ODPA_MOUSE	Pdha1
	tr|Q6DFY2|Q6DFY2_MOUSE	Opcml	4	9	9300000	0.055			sp|Q9DBH5|LMAN2_MOUSE	Lman2	5	7	5700000	0.0142			sp|Q9QYF9|NDRG3_MOUSE	Ndrg3	5	6	2200000	0.00873			sp|Q8K021|SCAM1_MOUSE	Scamp1	9	22	97000000	0.19			sp|O88307|SORL_MOUSE	Sorl1	10	10	1800000	0.00411			sp|Q80XR2|AT2C1_MOUSE	Atp2c1	8	10	2400000	0.00758		sp|P51906|EAA3_MOUSE	Slc1a1
	sp|Q9R0Q6|ARC1A_MOUSE	Arpc1a	4	9	5000000	0.0296			sp|Q9QYC0|ADDA_MOUSE	Add1	5	7	1600000	0.00408			sp|P35700|PRDX1_MOUSE	Prdx1	5	6	2100000	0.00838			sp|Q9ER00|STX12_MOUSE	Stx12	9	21	24000000	0.0452			sp|Q8CAQ8|MIC60_MOUSE	Immt	10	10	2300000	0.00536			sp|P35293|RAB18_MOUSE	Rab18	8	10	4800000	0.0153		sp|P08226|APOE_MOUSE	Apoe
	sp|P61750|ARF4_MOUSE	Arf4	4	9	1700000	0.00981			sp|Q9JK48|SHLB1_MOUSE	Sh3glb1	5	7	4400000	0.011			sp|Q8R105|VP37C_MOUSE	Vps37c	5	5	1300000	0.00529			sp|Q91V41|RAB14_MOUSE	Rab14	9	20	140000000	0.26			sp|P39053|DYN1_MOUSE	Dnm1	10	10	5000000	0.0115			sp|Q6PDL0|DC1L2_MOUSE	Dync1li2	8	10	2300000	0.00746		sp|P61226|RAP2B_MOUSE	Rap2b
	sp|Q8BL86|MBLC2_MOUSE	Mblac2	4	8	560000	0.00329			sp|Q9CS84|NRX1A_MOUSE	Nrxn1	5	7	2200000	0.00546			sp|Q9CZT8|RAB3B_MOUSE	Rab3b	5	5	1700000	0.00676			sp|Q99N28|CADM3_MOUSE	Cadm3	9	18	80000000	0.15			sp|B2RSH2|GNAI1_MOUSE	Gnai1	9	36	57000000	0.13			sp|Q9ERE7|MESD_MOUSE	Mesdc2	8	10	3000000	0.00971		sp|P63005|LIS1_MOUSE	Pafah1b1
	sp|Q8R105|VP37C_MOUSE	Vps37c	4	8	1400000	0.00827			sp|Q9CZT8|RAB3B_MOUSE	Rab3b	5	6	2500000	0.00622			sp|Q99LC5|ETFA_MOUSE	Etfa	5	5	640000	0.00256			sp|Q4V9Z5|SE6L2_MOUSE	Sez6l2	9	17	18000000	0.0344			sp|Q9CQW2|ARL8B_MOUSE	Arl8b	9	24	88000000	0.2			sp|P48453|PP2BB_MOUSE	Ppp3cb	8	10	12000000	0.0388		sp|Q8QZT1|THIL_MOUSE	Acat1
	sp|Q00623|APOA1_MOUSE	Apoa1	4	8	2600000	0.0155			sp|Q8QZT1|THIL_MOUSE	Acat1	5	6	1600000	0.00404			sp|Q8C129|LCAP_MOUSE	Lnpep	5	5	290000	0.00116			sp|Q6PHU5|SORT_MOUSE	Sort1	9	15	18000000	0.0336			sp|Q8K021|SCAM1_MOUSE	Scamp1	9	24	73000000	0.17			sp|Q8BLF1|NCEH1_MOUSE	Nceh1	8	10	4300000	0.0138		sp|Q62418|DBNL_MOUSE	Dbnl
	sp|P56812|PDCD5_MOUSE	Pdcd5	4	7	2500000	0.0149			sp|Q9JKK1|STX6_MOUSE	Stx6	5	6	700000	0.00176			sp|Q9QYA2|TOM40_MOUSE	Tomm40	5	5	1700000	0.00686			sp|Q7TQF7|AMPH_MOUSE	Amph	9	14	5600000	0.0106			sp|P97300|NPTN_MOUSE	Nptn	9	24	170000000	0.39			sp|Q8K2B3|SDHA_MOUSE	Sdha	8	10	2900000	0.00939		sp|Q99L47|F10A1_MOUSE	St13
	sp|P62823|RAB3C_MOUSE	Rab3c	4	7	3200000	0.0189			sp|Q99LC5|ETFA_MOUSE	Etfa	5	6	1200000	0.00299			sp|Q61036|PAK3_MOUSE	Pak3	5	5	430000	0.00169			sp|Q80U56|AVL9_MOUSE	Avl9	9	13	2900000	0.00551			sp|Q99N28|CADM3_MOUSE	Cadm3	9	19	64000000	0.15			sp|P29758|OAT_MOUSE	Oat	8	9	3100000	0.00986		sp|Q9Z0E0|NCDN_MOUSE	Ncdn
	sp|Q91ZR1|RAB4B_MOUSE	Rab4b	4	7	790000	0.00465			sp|Q9JLM8|DCLK1_MOUSE	Dclk1	5	6	1200000	0.00293			sp|P57746|VATD_MOUSE	Atp6v1d	5	5	880000	0.00347			sp|Q9DCN2|NB5R3_MOUSE	Cyb5r3	9	13	13000000	0.0253			sp|P63328|PP2BA_MOUSE	Ppp3ca	9	17	20000000	0.047			sp|Q8K2K6|AGFG1_MOUSE	Agfg1	8	9	5500000	0.0175		sp|P15116|CADH2_MOUSE	Cdh2
	sp|Q9ERE7|MESD_MOUSE	Mesdc2	4	7	1200000	0.00723			sp|P61979|HNRPK_MOUSE	Hnrnpk	5	6	1500000	0.00379			sp|Q9Z1Z2|STRAP_MOUSE	Strap	5	5	480000	0.0019			sp|Q8BH24|TM9S4_MOUSE	Tm9sf4	9	13	13000000	0.0242			sp|Q61792|LASP1_MOUSE	Lasp1	9	16	24000000	0.056			tr|Q0VGU4|Q0VGU4_MOUSE	Vgf	8	9	3100000	0.00986		sp|Q9D074|MGRN1_MOUSE	Mgrn1
	sp|Q8BLF1|NCEH1_MOUSE	Nceh1	4	7	960000	0.00566			sp|Q8BX94|OSBL2_MOUSE	Osbpl2	5	6	1100000	0.00271			sp|Q8K2C7|OS9_MOUSE	Os9	5	5	750000	0.00296			sp|Q8BYM5|NLGN3_MOUSE	Nlgn3	9	13	23000000	0.044			sp|Q8BYM5|NLGN3_MOUSE	Nlgn3	9	15	15000000	0.0341			sp|Q9DBH5|LMAN2_MOUSE	Lman2	8	9	5900000	0.0187		sp|P0C192|LRC4B_MOUSE	Lrrc4b
	sp|P99029|PRDX5_MOUSE	Prdx5	4	7	1400000	0.0082			sp|Q80TR1|AGRL1_MOUSE	Adgrl1	5	6	760000	0.0019			sp|Q9JKK1|STX6_MOUSE	Stx6	5	5	680000	0.00271			sp|Q05920|PYC_MOUSE	Pc	9	13	1700000	0.00332			sp|P57746|VATD_MOUSE	Atp6v1d	9	15	20000000	0.0466			sp|O35136|NCAM2_MOUSE	Ncam2	8	9	4200000	0.0133		tr|Q3ZAQ4|Q3ZAQ4_MOUSE	Atg9a
	sp|P63085|MK01_MOUSE	Mapk1	4	7	1800000	0.0105			sp|O70252|HMOX2_MOUSE	Hmox2	5	6	2600000	0.00661			sp|Q8VIM9|IRGQ_MOUSE	Irgq	5	5	500000	0.00198			sp|O35927|CTND2_MOUSE	Ctnnd2	9	13	2200000	0.00413			sp|Q8VEK0|CC50A_MOUSE	Tmem30a	9	15	15000000	0.0338			sp|Q9JHZ2|ANKH_MOUSE	Ankh	8	9	2700000	0.00857		sp|P56818|BACE1_MOUSE	Bace1
	sp|O70166|STMN3_MOUSE	Stmn3	4	7	2200000	0.0129			sp|Q9WV55|VAPA_MOUSE	Vapa	5	6	2900000	0.00736			sp|Q78JW9|UBFD1_MOUSE	Ubfd1	5	5	1200000	0.00465			sp|P39688|FYN_MOUSE	Fyn	9	13	6000000	0.0115			sp|P17742|PPIA_MOUSE	Ppia	9	14	30000000	0.0687			sp|O88307|SORL_MOUSE	Sorl1	8	9	1200000	0.00391		sp|Q9D1C8|VPS28_MOUSE	Vps28
	sp|P59999|ARPC4_MOUSE	Arpc4	4	7	1500000	0.00884			sp|Q6P9K9|NRX3A_MOUSE	Nrxn3	5	6	1300000	0.0032			sp|Q8C7E9|CSTFT_MOUSE	Cstf2t	5	5	430000	0.00171			sp|P70206|PLXA1_MOUSE	Plxna1	9	13	8600000	0.0163			sp|Q9JKF6|NECT1_MOUSE	Nectin1	9	13	11000000	0.0247			sp|P97467|AMD_MOUSE	Pam	8	9	3300000	0.0105		sp|Q8BLV3|SL9A7_MOUSE	Slc9a7
	sp|O08547|SC22B_MOUSE	Sec22b	4	6	1000000	0.00603			sp|Q9CQN1|TRAP1_MOUSE	Trap1	5	6	1200000	0.00311			sp|Q9CR68|UCRI_MOUSE	Uqcrfs1	5	5	1900000	0.00743			sp|P47867|SCG3_MOUSE	Scg3	9	12	4000000	0.00753			sp|Q8BNY6|NCS1_MOUSE	Ncs1	9	13	13000000	0.0299			sp|Q8BTS4|NUP54_MOUSE	Nup54	8	8	2200000	0.00703		sp|O88342|WDR1_MOUSE	Wdr1
	sp|P61979|HNRPK_MOUSE	Hnrnpk	4	6	760000	0.00451			sp|Q8CHU3|EPN2_MOUSE	Epn2	5	6	1100000	0.00278			sp|Q8CFE4|SCYL2_MOUSE	Scyl2	5	5	930000	0.00368			sp|Q9Z2I9|SUCB1_MOUSE	Sucla2	9	12	5200000	0.00982			sp|O54734|OST48_MOUSE	Ddost	9	13	7700000	0.0177			sp|Q9Z2G6|SE1L1_MOUSE	Sel1l	8	8	1600000	0.0051		sp|Q8C7E9|CSTFT_MOUSE	Cstf2t
	sp|Q6P5E6|GGA2_MOUSE	Gga2	4	6	240000	0.00142			sp|O35454|CLCN6_MOUSE	Clcn6	5	6	900000	0.00225			sp|Q9Z110|P5CS_MOUSE	Aldh18a1	5	5	650000	0.00256			sp|Q9CZ13|QCR1_MOUSE	Uqcrc1	9	12	17000000	0.0329			sp|Q91ZR1|RAB4B_MOUSE	Rab4b	9	13	21000000	0.0474			sp|P57780|ACTN4_MOUSE	Actn4	8	8	1600000	0.00513		sp|Q8CHU3|EPN2_MOUSE	Epn2
	sp|Q8BXZ1|TMX3_MOUSE	Tmx3	4	6	410000	0.0024			sp|P98156|VLDLR_MOUSE	Vldlr	5	6	770000	0.00193			sp|Q9WUL7|ARL3_MOUSE	Arl3	5	5	930000	0.00369			sp|Q9CQQ7|AT5F1_MOUSE	Atp5f1	9	12	12000000	0.0224			sp|O70439|STX7_MOUSE	Stx7	9	13	13000000	0.0294			sp|Q9CPW0|CNTP2_MOUSE	Cntnap2	8	8	2000000	0.00625		sp|Q9CQN1|TRAP1_MOUSE	Trap1
	sp|Q6PGF7|EXOC8_MOUSE	Exoc8	4	6	540000	0.00319			sp|Q61831|MK10_MOUSE	Mapk10	5	6	850000	0.00213			sp|Q06890|CLUS_MOUSE	Clu	5	5	710000	0.00281			sp|P61294|RAB6B_MOUSE	Rab6b	9	12	20000000	0.0374			sp|P57759|ERP29_MOUSE	Erp29	9	13	9400000	0.0217			sp|O70252|HMOX2_MOUSE	Hmox2	8	8	2100000	0.00666		sp|Q8CFE4|SCYL2_MOUSE	Scyl2
	sp|Q8BZ98|DYN3_MOUSE	Dnm3	4	6	900000	0.00534			sp|Q9Z0E0|NCDN_MOUSE	Ncdn	5	6	1200000	0.00305			sp|Q9R0Q6|ARC1A_MOUSE	Arpc1a	5	5	960000	0.00381			sp|Q8K2K6|AGFG1_MOUSE	Agfg1	9	12	11000000	0.0205			sp|Q9JJY3|NSMA2_MOUSE	Smpd3	9	12	8500000	0.0195			sp|Q61699|HS105_MOUSE	Hsph1	8	8	2900000	0.00923		sp|Q8BX94|OSBL2_MOUSE	Osbpl2
	sp|P35486|ODPA_MOUSE	Pdha1	4	6	1900000	0.0115			sp|P10630|IF4A2_MOUSE	Eif4a2	5	6	1100000	0.00287			sp|Q9WV34|MPP2_MOUSE	Mpp2	5	5	930000	0.00369			sp|P48453|PP2BB_MOUSE	Ppp3cb	9	12	16000000	0.0305			sp|Q8C0L0|TMX4_MOUSE	Tmx4	9	12	10000000	0.0237			sp|Q05920|PYC_MOUSE	Pc	8	8	980000	0.00312		sp|Q6PCP5|MFF_MOUSE	Mff
	sp|Q61490|CD166_MOUSE	Alcam	4	6	1400000	0.00815			sp|Q8JZN5|ACAD9_MOUSE	Acad9	5	6	1000000	0.00261			sp|Q05920|PYC_MOUSE	Pc	5	5	310000	0.00122			sp|Q04447|KCRB_MOUSE	Ckb	9	11	6000000	0.0114			sp|P52480|KPYM_MOUSE	Pkm	9	12	3700000	0.00849			sp|Q6ZQ38|CAND1_MOUSE	Cand1	8	8	2500000	0.00814		sp|Q8K009|AL1L2_MOUSE	Aldh1l2
	sp|P60904|DNJC5_MOUSE	Dnajc5	4	6	1300000	0.00779			sp|B2RXS4|PLXB2_MOUSE	Plxnb2	5	6	1000000	0.00264			sp|Q6P1D5|SE6L1_MOUSE	Sez6l	5	5	5800000	0.0229			sp|P15116|CADH2_MOUSE	Cdh2	9	11	11000000	0.0204			tr|Q3ZAQ4|Q3ZAQ4_MOUSE	Atg9a	9	12	9100000	0.0211			sp|Q8CIN4|PAK2_MOUSE	Pak2	8	8	1900000	0.00604		sp|Q811D0|DLG1_MOUSE	Dlg1
	sp|P28667|MRP_MOUSE	Marcksl1	4	6	4300000	0.0256			sp|Q99LX0|PARK7_MOUSE	Park7	5	6	1500000	0.00381			sp|Q8BFT9|SVOP_MOUSE	Svop	5	5	770000	0.00304			sp|P27612|PLAP_MOUSE	Plaa	9	11	3100000	0.00591			sp|Q9JKK7|TMOD2_MOUSE	Tmod2	9	11	9500000	0.022			sp|Q9D074|MGRN1_MOUSE	Mgrn1	8	8	1100000	0.00353		sp|P97390|VPS45_MOUSE	Vps45
	sp|Q8R180|ERO1A_MOUSE	Ero1a	4	6	610000	0.00361			sp|Q9DBS1|TMM43_MOUSE	Tmem43	5	6	4900000	0.0123			sp|Q7TSJ2|MAP6_MOUSE	Map6	5	5	290000	0.00116			sp|Q6R0H7|GNAS1_MOUSE	Gnas	9	11	8600000	0.0164			sp|Q9CZ44|NSF1C_MOUSE	Nsfl1c	9	11	4800000	0.0111			sp|O54734|OST48_MOUSE	Ddost	8	8	5300000	0.0171		sp|Q8K0D5|EFGM_MOUSE	Gfm1
	sp|Q8BYM5|NLGN3_MOUSE	Nlgn3	4	6	1300000	0.00793			sp|Q9D074|MGRN1_MOUSE	Mgrn1	5	6	560000	0.0014			sp|Q76MZ3|2AAA_MOUSE	Ppp2r1a	5	5	1600000	0.00615			sp|Q6PB44|PTN23_MOUSE	Ptpn23	9	10	2600000	0.00494			sp|Q04447|KCRB_MOUSE	Ckb	9	11	4900000	0.0113			sp|Q3UZV7|K132L_MOUSE		8	8	3400000	0.0107		sp|Q8BKG3|PTK7_MOUSE	Ptk7
	sp|Q9CYN9|RENR_MOUSE	Atp6ap2	4	6	1000000	0.00607			sp|Q6R0H7|GNAS1_MOUSE	Gnas	5	6	2500000	0.00623			sp|Q99PU5|ACBG1_MOUSE	Acsbg1	5	5	340000	0.00133			sp|Q9CPW0|CNTP2_MOUSE	Cntnap2	9	10	2600000	0.00498			sp|Q8R1Q8|DC1L1_MOUSE	Dync1li1	9	11	2400000	0.00557			sp|Q6ZQA6|IGSF3_MOUSE	Igsf3	8	8	1900000	0.00593		sp|Q60931|VDAC3_MOUSE	Vdac3
	sp|Q62165|DAG1_MOUSE	Dag1	4	6	460000	0.00273			sp|O08547|SC22B_MOUSE	Sec22b	5	5	1500000	0.00377			sp|Q9Z0E0|NCDN_MOUSE	Ncdn	5	5	900000	0.00358			sp|Q60597|ODO1_MOUSE	Ogdh	9	10	1900000	0.00363			sp|P54763|EPHB2_MOUSE	Ephb2	9	11	6300000	0.0145			sp|Q8BSL7|ARF2_MOUSE	Arf2	7	27	180000000	0.56		sp|Q9CQV8|1433B_MOUSE	Ywhab
	sp|Q99L47|F10A1_MOUSE	St13	4	6	2000000	0.0117			sp|Q8BFZ9|ERLN2_MOUSE	Erlin2	5	5	1000000	0.00254			sp|Q7TQ95|LNP_MOUSE	Lnp	5	5	370000	0.00145			tr|B1AWN6|B1AWN6_MOUSE	Scn2a	9	10	4000000	0.00759			sp|Q3UPL0|SC31A_MOUSE	Sec31a	9	11	1600000	0.00367			sp|Q8VEK0|CC50A_MOUSE	Tmem30a	7	25	11000000	0.034		sp|Q60930|VDAC2_MOUSE	Vdac2
	sp|Q8C7K6|PCYXL_MOUSE	Pcyox1l	4	6	1100000	0.00666			sp|Q91Z38|TTC1_MOUSE	Ttc1	5	5	1400000	0.00359			sp|Q8R1N4|NUDC3_MOUSE	Nudcd3	5	5	650000	0.00256			sp|P61161|ARP2_MOUSE	Actr2	9	10	3800000	0.00728			sp|Q61553|FSCN1_MOUSE	Fscn1	9	11	4100000	0.00952			sp|Q9CQV8|1433B_MOUSE	Ywhab	7	22	3700000	0.0119		sp|P59279|RAB2B_MOUSE	Rab2b
	sp|Q8C7E9|CSTFT_MOUSE	Cstf2t	4	6	450000	0.00266			sp|Q9QXY6|EHD3_MOUSE	Ehd3	5	5	780000	0.00195			sp|Q9CZU6|CISY_MOUSE	Cs	5	5	530000	0.00211			sp|P56818|BACE1_MOUSE	Bace1	9	10	6100000	0.0117			sp|Q6ZQ38|CAND1_MOUSE	Cand1	9	11	2200000	0.00514			sp|O35874|SATT_MOUSE	Slc1a4	7	21	34000000	0.11		sp|Q8VEH3|ARL8A_MOUSE	Arl8a
	sp|P35821|PTN1_MOUSE	Ptpn1	4	6	730000	0.0043			sp|O35887|CALU_MOUSE	Calu	5	5	810000	0.00203			sp|Q9DBJ1|PGAM1_MOUSE	Pgam1	5	5	1700000	0.00667			sp|Q61316|HSP74_MOUSE	Hspa4	9	9	2300000	0.00431			sp|Q9JKK1|STX6_MOUSE	Stx6	9	10	6900000	0.0159			sp|P59279|RAB2B_MOUSE	Rab2b	7	19	63000000	0.2		sp|P31650|S6A11_MOUSE	Slc6a11
	sp|P24270|CATA_MOUSE	Cat	4	6	610000	0.00358			sp|Q9WV34|MPP2_MOUSE	Mpp2	5	5	1600000	0.00396			sp|Q6P9K9|NRX3A_MOUSE	Nrxn3	5	5	530000	0.00211			sp|Q8CAQ8|MIC60_MOUSE	Immt	9	9	2600000	0.00495			sp|Q8QZT1|THIL_MOUSE	Acat1	9	10	4600000	0.0105			sp|Q9D593|VATE2_MOUSE	Atp6v1e2	7	19	18000000	0.0563		sp|P31648|SC6A1_MOUSE	Slc6a1
	sp|Q811Q9|PCY1B_MOUSE	Pcyt1b	4	6	1100000	0.00625			sp|Q99KJ8|DCTN2_MOUSE	Dctn2	5	5	1100000	0.00286			sp|O35678|MGLL_MOUSE	Mgll	5	5	560000	0.00223			sp|Q3UPL0|SC31A_MOUSE	Sec31a	9	9	1900000	0.00355			sp|Q9DCN2|NB5R3_MOUSE	Cyb5r3	9	10	10000000	0.0239			sp|Q60930|VDAC2_MOUSE	Vdac2	7	14	33000000	0.11		sp|P97765|WBP2_MOUSE	Wbp2
	sp|Q6PHU5|SORT_MOUSE	Sort1	4	6	700000	0.00412			sp|P47867|SCG3_MOUSE	Scg3	5	5	590000	0.00148			sp|Q9DB73|NB5R1_MOUSE	Cyb5r1	5	5	800000	0.00317			sp|Q8K0U4|HS12A_MOUSE	Hspa12a	9	9	4900000	0.00934			tr|Q8CFX3|Q8CFX3_MOUSE	Pcdh1	9	10	4400000	0.0101			sp|O08749|DLDH_MOUSE	Dld	7	12	6200000	0.0199		sp|P97825|JUPI1_MOUSE	JPT1
	sp|Q62048|PEA15_MOUSE	Pea15	4	6	500000	0.00295			sp|Q7TQ95|LNP_MOUSE	Lnp	5	5	770000	0.00193			sp|Q91ZA3|PCCA_MOUSE	Pcca	5	5	3500000	0.0138			sp|Q8VBZ3|CLPT1_MOUSE	Clptm1	9	9	5400000	0.0102			sp|Q8C7K6|PCYXL_MOUSE	Pcyox1l	9	10	7400000	0.0171			sp|Q9D1D4|TMEDA_MOUSE	Tmed10	7	12	17000000	0.053		sp|Q9CQC9|SAR1B_MOUSE	Sar1b
	sp|Q9CR16|PPID_MOUSE	Ppid	4	6	7500000	0.0441			sp|Q8BL66|EEA1_MOUSE	Eea1	5	5	520000	0.00131			sp|Q03517|SCG2_MOUSE	Scg2	5	5	530000	0.0021			sp|Q8K400|STXB5_MOUSE	Stxbp5	9	9	4000000	0.00755			sp|Q61598|GDIB_MOUSE	Gdi2	9	10	2500000	0.00585			sp|P61089|UBE2N_MOUSE	Ube2n	7	11	12000000	0.038		sp|P99029|PRDX5_MOUSE	Prdx5
	sp|Q8R1V4|TMED4_MOUSE	Tmed4	4	6	730000	0.00433			sp|Q9DAU1|CNPY3_MOUSE	Cnpy3	5	5	1100000	0.00281			sp|Q8CHU3|EPN2_MOUSE	Epn2	5	5	530000	0.00212			sp|P61027|RAB10_MOUSE	Rab10	8	31	810000000	1.54			sp|P48453|PP2BB_MOUSE	Ppp3cb	9	10	13000000	0.0294			sp|P62962|PROF1_MOUSE	Pfn1	7	11	7200000	0.0231		sp|P61021|RAB5B_MOUSE	Rab5b
	sp|Q9QYE6|GOGA5_MOUSE	Golga5	4	5	650000	0.00384			sp|Q8K221|ARFP2_MOUSE	Arfip2	5	5	1300000	0.00329			sp|Q99M51|NCK1_MOUSE	Nck1	5	5	350000	0.00138			sp|P14094|AT1B1_MOUSE	Atp1b1	8	26	370000000	0.7			sp|Q6R0H7|GNAS1_MOUSE	Gnas	9	10	6100000	0.0141			sp|Q9D6F9|TBB4A_MOUSE	Tubb4a	7	10	6900000	0.0221		sp|Q9WV55|VAPA_MOUSE	Vapa
	sp|Q9JHU2|PALMD_MOUSE	Palmd	4	5	270000	0.0016			sp|Q8CAQ8|MIC60_MOUSE	Immt	5	5	1000000	0.00256			sp|P61161|ARP2_MOUSE	Actr2	5	5	1300000	0.00531			sp|Q60931|VDAC3_MOUSE	Vdac3	8	23	90000000	0.17			sp|P53810|PIPNA_MOUSE	Pitpna	9	10	5900000	0.0136			sp|P61294|RAB6B_MOUSE	Rab6b	7	10	14000000	0.0452		sp|Q09143|CTR1_MOUSE	Slc7a1
	sp|Q8R570|SNP47_MOUSE	Snap47	4	5	580000	0.00342			sp|P35822|PTPRK_MOUSE	Ptprk	5	5	760000	0.00191			sp|P98156|VLDLR_MOUSE	Vldlr	5	5	330000	0.0013			sp|P35803|GPM6B_MOUSE	Gpm6b	8	23	77000000	0.15			sp|P32037|GTR3_MOUSE	Slc2a3	9	9	13000000	0.0301			sp|Q9D1K2|VATF_MOUSE	Atp6v1f	7	10	11000000	0.0351		sp|Q9ERT9|PPR1A_MOUSE	Ppp1r1a
	sp|Q9WVK4|EHD1_MOUSE	Ehd1	4	5	1600000	0.00957			sp|Q62420|SH3G2_MOUSE	Sh3gl2	5	5	2300000	0.00566			sp|P14152|MDHC_MOUSE	Mdh1	5	5	1400000	0.00549			sp|O35874|SATT_MOUSE	Slc1a4	8	19	54000000	0.1			sp|Q9QXS6|DREB_MOUSE	Dbn1	9	9	4500000	0.0105			sp|P99029|PRDX5_MOUSE	Prdx5	7	10	8700000	0.0279		sp|Q07076|ANXA7_MOUSE	Anxa7
	sp|Q6P9K9|NRX3A_MOUSE	Nrxn3	4	5	230000	0.00134			sp|P28658|ATX10_MOUSE	Atxn10	5	5	950000	0.0024			sp|Q6NZC7|S23IP_MOUSE	Sec23ip	5	5	380000	0.00152			sp|Q60930|VDAC2_MOUSE	Vdac2	8	19	76000000	0.14			sp|P57780|ACTN4_MOUSE	Actn4	9	9	2100000	0.0048			sp|O08579|EMD_MOUSE	Emd	7	10	2900000	0.00933		sp|Q9QYI5|DNJB2_MOUSE	Dnajb2
	sp|Q9D7E4|CS025_MOUSE		4	5	360000	0.00214			sp|Q8BMI3|GGA3_MOUSE	Gga3	5	5	1000000	0.00263			sp|Q8BLQ9|CADM2_MOUSE	Cadm2	5	5	3900000	0.0153			sp|P19783|COX41_MOUSE	Cox4i1	8	16	32000000	0.0609			sp|Q60629|EPHA5_MOUSE	Epha5	9	9	2800000	0.00643			sp|Q4V9Z5|SE6L2_MOUSE	Sez6l2	7	9	5700000	0.0181		sp|Q6ZQI3|MLEC_MOUSE	Mlec
	tr|Q0VGU4|Q0VGU4_MOUSE	Vgf	4	5	680000	0.004			sp|Q9Z2X1|HNRPF_MOUSE	Hnrnpf	5	5	1600000	0.00401			sp|Q8BVQ5|PPME1_MOUSE	Ppme1	5	5	840000	0.00334			sp|Q8BLQ9|CADM2_MOUSE	Cadm2	8	15	44000000	0.0836			sp|P17182|ENOA_MOUSE	Eno1	9	9	3800000	0.00866			sp|P47754|CAZA2_MOUSE	Capza2	7	9	2400000	0.00759		sp|Q8BR92|PALM2_MOUSE	Palm2
	sp|Q91Z38|TTC1_MOUSE	Ttc1	4	5	300000	0.00176			sp|P35821|PTN1_MOUSE	Ptpn1	5	5	950000	0.00239			sp|Q99KV1|DJB11_MOUSE	Dnajb11	5	5	700000	0.00277			sp|P35278|RAB5C_MOUSE	Rab5c	8	14	27000000	0.0518			sp|Q8BHZ0|FA49A_MOUSE	Fam49a	9	9	3700000	0.00855			sp|P58021|TM9S2_MOUSE	Tm9sf2	7	9	8300000	0.0264		sp|Q9R0P9|UCHL1_MOUSE	Uchl1
	sp|P06745|G6PI_MOUSE	Gpi	4	5	550000	0.00325			sp|P10649|GSTM1_MOUSE	Gstm1	5	5	2300000	0.00573			sp|P10630|IF4A2_MOUSE	Eif4a2	5	5	560000	0.00221			sp|P31648|SC6A1_MOUSE	Slc6a1	8	14	73000000	0.14			sp|Q60864|STIP1_MOUSE	Stip1	9	9	3000000	0.00687			sp|Q8BXR1|S7A14_MOUSE	Slc7a14	7	9	4400000	0.0139		tr|Q99M55|Q99M55_MOUSE	Atp6v0a1
	sp|Q63844|MK03_MOUSE	Mapk3	4	5	440000	0.00262			sp|Q60597|ODO1_MOUSE	Ogdh	5	5	1100000	0.00266			sp|Q9CQA3|SDHB_MOUSE	Sdhb	5	5	1200000	0.00465			sp|P21279|GNAQ_MOUSE	Gnaq	8	13	13000000	0.0238			sp|Q9Z0H8|CLIP2_MOUSE	Clip2	9	9	2600000	0.00596			tr|Q91VA7|Q91VA7_MOUSE	Idh3b	7	9	1700000	0.00552		sp|Q8BFT9|SVOP_MOUSE	Svop
	sp|Q9D6J6|NDUV2_MOUSE	Ndufv2	4	5	360000	0.00213			sp|Q9R1Q8|TAGL3_MOUSE	Tagln3	5	5	3100000	0.00776			sp|Q00623|APOA1_MOUSE	Apoa1	5	5	1600000	0.00621			sp|P00405|COX2_MOUSE	Mtco2	8	13	23000000	0.0446			sp|Q8BLK3|LSAMP_MOUSE	Lsamp	8	37	66000000	0.15			sp|Q9DAM7|TM263_MOUSE	Tmem263	7	9	5900000	0.0189		sp|Q921M7|FA49B_MOUSE	Fam49b
	sp|Q8BYI8|F234B_MOUSE	Fam234b	4	5	340000	0.00202			sp|Q9Z110|P5CS_MOUSE	Aldh18a1	5	5	650000	0.00164			IGKC_MOUSE		4	36	170000000	0.67			sp|Q8C0L0|TMX4_MOUSE	Tmx4	8	13	15000000	0.0295			sp|P54227|STMN1_MOUSE	Stmn1	8	30	140000000	0.33			sp|Q922S4|PDE2A_MOUSE	Pde2a	7	9	2800000	0.0088		sp|Q8K2C7|OS9_MOUSE	Os9
	sp|Q8BIQ5|CSTF2_MOUSE	Cstf2	4	5	1100000	0.00624			sp|Q3UEB3|PUF60_MOUSE	Puf60	5	5	690000	0.00175			sp|Q9Z127|LAT1_MOUSE	Slc7a5	4	25	13000000	0.0534			sp|Q9DB20|ATPO_MOUSE	Atp5o	8	13	20000000	0.0372			sp|Q8R191|SNG3_MOUSE	Syngr3	8	30	190000000	0.43			sp|Q9CR68|UCRI_MOUSE	Uqcrfs1	7	9	6200000	0.0197		sp|Q9R0Y5|KAD1_MOUSE	Ak1
	sp|O70591|PFD2_MOUSE	Pfdn2	4	5	680000	0.00402			sp|Q66JS6|EI3JB_MOUSE	Eif3j2	5	5	1000000	0.00258			sp|P35802|GPM6A_MOUSE	Gpm6a	4	25	76000000	0.3			sp|Q9QZM0|UBQL2_MOUSE	Ubqln2	8	12	22000000	0.0424			sp|Q9ER00|STX12_MOUSE	Stx12	8	21	34000000	0.0793			sp|Q8BYM5|NLGN3_MOUSE	Nlgn3	7	8	5100000	0.0162		sp|Q6PDM2|SRSF1_MOUSE	Srsf1
	sp|Q8CAQ8|MIC60_MOUSE	Immt	4	5	230000	0.00139			sp|P0C192|LRC4B_MOUSE	Lrrc4b	5	5	1400000	0.00354			sp|P01831|THY1_MOUSE	Thy1	4	24	63000000	0.25			sp|Q61792|LASP1_MOUSE	Lasp1	8	12	23000000	0.0432			sp|P63101|1433Z_MOUSE	Ywhaz	8	20	57000000	0.13			sp|Q921H8|THIKA_MOUSE	Acaa1a	7	8	2400000	0.00761		sp|Q9D1K2|VATF_MOUSE	Atp6v1f
	sp|Q922D8|C1TC_MOUSE	Mthfd1	4	5	280000	0.00168			sp|P54923|ADPRH_MOUSE	Adprh	5	5	1300000	0.00329			sp|P62983|RS27A_MOUSE	Rps27a	4	16	66000000	0.26			tr|Q8C048|Q8C048_MOUSE	Atp2b3	8	11	3900000	0.00746			sp|P59279|RAB2B_MOUSE	Rab2b	8	19	60000000	0.14			sp|Q63810|CANB1_MOUSE	Ppp3r1	7	8	9400000	0.03		sp|P47754|CAZA2_MOUSE	Capza2
	sp|Q7TSJ2|MAP6_MOUSE	Map6	4	5	170000	0.00102			sp|Q8BTG7|NDRG4_MOUSE	Ndrg4	5	5	2300000	0.00567			sp|O70456|1433S_MOUSE	Sfn	4	13	63000000	0.25			sp|P18052|PTPRA_MOUSE	Ptpra	8	11	3900000	0.00751			sp|P35803|GPM6B_MOUSE	Gpm6b	8	16	58000000	0.13			sp|Q99LC5|ETFA_MOUSE	Etfa	7	8	2000000	0.00642		sp|P23506|PIMT_MOUSE	Pcmt1
	sp|Q61598|GDIB_MOUSE	Gdi2	4	5	790000	0.0047			sp|Q8BVQ5|PPME1_MOUSE	Ppme1	5	5	1200000	0.00307			sp|O54901|OX2G_MOUSE	Cd200	4	12	34000000	0.14			sp|Q8BLV3|SL9A7_MOUSE	Slc9a7	8	11	7200000	0.0138			sp|Q9QZM0|UBQL2_MOUSE	Ubqln2	8	15	30000000	0.0687			sp|Q9QYA2|TOM40_MOUSE	Tomm40	7	8	4700000	0.0151		sp|P61211|ARL1_MOUSE	Arl1
	sp|Q8BMI3|GGA3_MOUSE	Gga3	4	5	590000	0.00349			sp|Q8C080|SNX16_MOUSE	Snx16	5	5	1300000	0.00338			sp|P36536|SAR1A_MOUSE	Sar1a	4	11	15000000	0.0612			sp|Q8BFZ9|ERLN2_MOUSE	Erlin2	8	11	3800000	0.00722			sp|Q9R1Q9|VAS1_MOUSE	Atp6ap1	8	15	56000000	0.13			sp|Q62165|DAG1_MOUSE	Dag1	7	8	1800000	0.00566		sp|Q68FL4|SAHH3_MOUSE	Ahcyl2
	sp|B2RXS4|PLXB2_MOUSE	Plxnb2	4	5	180000	0.00106			sp|Q9WVG6|CARM1_MOUSE	Carm1	5	5	3300000	0.00821			sp|Q9CQ92|FIS1_MOUSE	Fis1	4	11	8800000	0.0351			sp|Q922R8|PDIA6_MOUSE	Pdia6	8	10	14000000	0.027			sp|P35278|RAB5C_MOUSE	Rab5c	8	14	24000000	0.0549			sp|P61226|RAP2B_MOUSE	Rap2b	7	8	5900000	0.0189		sp|Q9R1J0|NSDHL_MOUSE	Nsdhl
	sp|Q9WUL7|ARL3_MOUSE	Arl3	4	5	340000	0.002			sp|Q5SQY2|BOD1_MOUSE	Bod1	5	5	910000	0.00229			sp|Q9CQX2|CYB5B_MOUSE	Cyb5b	4	11	14000000	0.0541			sp|Q9JKK7|TMOD2_MOUSE	Tmod2	8	10	6700000	0.0127			sp|Q9QUR8|SEM7A_MOUSE	Sema7a	8	14	4500000	0.0103			sp|Q68FL4|SAHH3_MOUSE	Ahcyl2	7	8	1600000	0.00512		sp|Q99LC5|ETFA_MOUSE	Etfa
	sp|Q99KW9|TIP_MOUSE	Itfg1	4	5	880000	0.00523			tr|B1AWN6|B1AWN6_MOUSE	Scn2a	5	5	870000	0.00218			sp|P18760|COF1_MOUSE	Cfl1	4	10	13000000	0.0518			sp|P32037|GTR3_MOUSE	Slc2a3	8	10	16000000	0.031			sp|O08749|DLDH_MOUSE	Dld	8	13	9000000	0.0209			sp|P17182|ENOA_MOUSE	Eno1	7	8	3100000	0.00979		sp|Q9JLB9|NECT3_MOUSE	Nectin3
	sp|Q8JZN5|ACAD9_MOUSE	Acad9	4	5	380000	0.00226			sp|Q9D172|ES1_MOUSE	D10Jhu81e	5	5	1700000	0.00434			sp|P62835|RAP1A_MOUSE	Rap1a	4	9	10000000	0.0409			sp|Q9QYF9|NDRG3_MOUSE	Ndrg3	8	10	11000000	0.0201			sp|P00405|COX2_MOUSE	Mtco2	8	13	22000000	0.0512			sp|P08226|APOE_MOUSE	Apoe	7	8	4000000	0.0127		sp|Q9CZU6|CISY_MOUSE	Cs
	sp|O35188|X3CL1_MOUSE	Cx3cl1	4	5	660000	0.00391			tr|Q3TU36|Q3TU36_MOUSE	Rap1gds1	5	5	500000	0.00125			sp|P97797|SHPS1_MOUSE	Sirpa	4	9	9300000	0.0368			sp|P61226|RAP2B_MOUSE	Rap2b	8	10	15000000	0.0286			sp|P62748|HPCL1_MOUSE	Hpcal1	8	13	9800000	0.0226			sp|Q9ERT9|PPR1A_MOUSE	Ppp1r1a	7	8	5300000	0.017		sp|Q8BM72|HSP13_MOUSE	Hspa13
	sp|Q9Z2X1|HNRPF_MOUSE	Hnrnpf	4	5	610000	0.00358			sp|Q9CVB6|ARPC2_MOUSE	Arpc2	5	5	2700000	0.00669			sp|Q80Z24|NEGR1_MOUSE	Negr1	4	9	11000000	0.0429			sp|P98156|VLDLR_MOUSE	Vldlr	8	10	2300000	0.0043			sp|P61021|RAB5B_MOUSE	Rab5b	8	13	31000000	0.0721			sp|P12367|KAP2_MOUSE	Prkar2a	7	8	6600000	0.0212		sp|Q6P6J9|TXD15_MOUSE	Txndc15
	sp|Q99JB2|STML2_MOUSE	Stoml2	4	4	250000	0.0015			IGKC_MOUSE		4	34	340000000	0.84			sp|P63044|VAMP2_MOUSE	Vamp2	4	8	33000000	0.13			sp|Q8C129|LCAP_MOUSE	Lnpep	8	9	2100000	0.0039			sp|Q9WV55|VAPA_MOUSE	Vapa	8	13	5700000	0.0132			sp|Q922P8|T132A_MOUSE	Tmem132a	7	7	1900000	0.00614		sp|P10637|TAU_MOUSE	Mapt
	sp|Q4V9Z5|SE6L2_MOUSE	Sez6l2	4	4	550000	0.00326			sp|P01831|THY1_MOUSE	Thy1	4	33	160000000	0.41			sp|P61982|1433G_MOUSE	Ywhag	4	8	12000000	0.0493			sp|Q9CZ44|NSF1C_MOUSE	Nsfl1c	8	9	4800000	0.00905			sp|Q9CZ13|QCR1_MOUSE	Uqcrc1	8	12	15000000	0.0343			sp|P70297|STAM1_MOUSE	Stam	7	7	1800000	0.00559		sp|Q9R1Q8|TAGL3_MOUSE	Tagln3
	sp|P35288|RAB23_MOUSE	Rab23	4	4	380000	0.00227			sp|Q9WV27|AT1A4_MOUSE	Atp1a4	4	15	41000000	0.1			sp|Q8BZ98|DYN3_MOUSE	Dnm3	4	8	1200000	0.00476			sp|Q03517|SCG2_MOUSE	Scg2	8	9	2800000	0.00539			sp|Q99KF1|TMED9_MOUSE	Tmed9	8	12	14000000	0.0328			sp|Q8QZT1|THIL_MOUSE	Acat1	7	7	2100000	0.00668		sp|Q9DBS1|TMM43_MOUSE	Tmem43
	sp|P52875|TM165_MOUSE	Tmem165	4	4	250000	0.0015			sp|P62983|RS27A_MOUSE	Rps27a	4	14	66000000	0.17			sp|Q9ET30|TM9S3_MOUSE	Tm9sf3	4	8	1400000	0.00554			sp|Q9DBH5|LMAN2_MOUSE	Lman2	8	9	12000000	0.0221			sp|P39688|FYN_MOUSE	Fyn	8	12	3800000	0.00886			sp|P51906|EAA3_MOUSE	Slc1a1	7	7	2700000	0.00853		sp|P32507|NECT2_MOUSE	Nectin2
	sp|Q9Z1L5|CA2D3_MOUSE	Cacna2d3	4	4	490000	0.00288			sp|P18760|COF1_MOUSE	Cfl1	4	13	18000000	0.0444			tr|D3YZZ5|D3YZZ5_MOUSE	Tmed7	4	8	5600000	0.0221			sp|Q8BHZ0|FA49A_MOUSE	Fam49a	8	9	4100000	0.00783			sp|Q7TN29|SMAP2_MOUSE	Smap2	8	12	11000000	0.025			sp|Q8BHZ0|FA49A_MOUSE	Fam49a	7	7	15000000	0.0474		sp|P35293|RAB18_MOUSE	Rab18
	sp|Q62318|TIF1B_MOUSE	Trim28	4	4	320000	0.00188			sp|Q80Z24|NEGR1_MOUSE	Negr1	4	13	28000000	0.0694			sp|P11438|LAMP1_MOUSE	Lamp1	4	8	3000000	0.0119			sp|Q62165|DAG1_MOUSE	Dag1	8	9	5100000	0.00972			tr|Q99M55|Q99M55_MOUSE	Atp6v0a1	8	11	19000000	0.0442			sp|Q61316|HSP74_MOUSE	Hspa4	7	7	1000000	0.00334		sp|Q8CAY6|THIC_MOUSE	Acat2
	sp|P05064|ALDOA_MOUSE	Aldoa	4	4	660000	0.00389			sp|P36536|SAR1A_MOUSE	Sar1a	4	11	24000000	0.0603			sp|Q9R0Q3|TMED2_MOUSE	Tmed2	4	8	910000	0.00359			sp|P53810|PIPNA_MOUSE	Pitpna	8	9	4600000	0.00866			sp|Q6PHU5|SORT_MOUSE	Sort1	8	11	10000000	0.0238			sp|Q99PT1|GDIR1_MOUSE	Arhgdia	7	7	3300000	0.0106		sp|P0DI97|NRX1B_MOUSE	Nrxn1
	sp|Q80VP1|EPN1_MOUSE	Epn1	4	4	360000	0.00214			sp|P28667|MRP_MOUSE	Marcksl1	4	10	19000000	0.0471			sp|Q05816|FABP5_MOUSE	Fabp5	4	8	7800000	0.031			sp|Q68FL4|SAHH3_MOUSE	Ahcyl2	8	9	3800000	0.00725			sp|Q4V9Z5|SE6L2_MOUSE	Sez6l2	8	10	8200000	0.019			sp|P52480|KPYM_MOUSE	Pkm	7	7	2500000	0.00789		sp|O88643|PAK1_MOUSE	Pak1
	sp|P15116|CADH2_MOUSE	Cdh2	4	4	270000	0.00157			sp|P14231|AT1B2_MOUSE	Atp1b2	4	10	8300000	0.0209			sp|Q9D1G1|RAB1B_MOUSE	Rab1b	4	7	2200000	0.0086			sp|P19096|FAS_MOUSE	Fasn	8	9	4200000	0.008			sp|Q61411|RASH_MOUSE	Hras	8	10	7600000	0.0176			sp|Q9JLB9|NECT3_MOUSE	Nectin3	7	7	3100000	0.00983		sp|P63085|MK01_MOUSE	Mapk1
	sp|Q61627|GRID1_MOUSE	Grid1	4	4	150000	0.000885			sp|Q9WTL7|LYPA2_MOUSE	Lypla2	4	10	1400000	0.00342			sp|O70492|SNX3_MOUSE	Snx3	4	7	6200000	0.0244			sp|P50396|GDIA_MOUSE	Gdi1	8	8	2600000	0.0049			sp|Q9QYF9|NDRG3_MOUSE	Ndrg3	8	10	7500000	0.0173			sp|Q9DAW9|CNN3_MOUSE	Cnn3	7	7	1800000	0.00566		sp|Q99LP6|GRPE1_MOUSE	Grpel1
	sp|Q06890|CLUS_MOUSE	Clu	4	4	450000	0.00265			sp|Q8R464|CADM4_MOUSE	Cadm4	4	9	14000000	0.0352			sp|Q9R013|CATF_MOUSE	Ctsf	4	7	5200000	0.0205			sp|Q9DB05|SNAA_MOUSE	Napa	8	8	5100000	0.0098			sp|Q8BK64|AHSA1_MOUSE	Ahsa1	8	10	7200000	0.0165			sp|Q91YJ2|SNX4_MOUSE	Snx4	7	7	930000	0.00296		sp|Q6P069|SORCN_MOUSE	Sri
	sp|P18052|PTPRA_MOUSE	Ptpra	4	4	310000	0.00184			sp|P24668|MPRD_MOUSE	M6pr	4	9	3600000	0.00911			sp|P63005|LIS1_MOUSE	Pafah1b1	4	7	1500000	0.00602			tr|Q0VGU4|Q0VGU4_MOUSE	Vgf	8	8	3100000	0.00587			sp|Q8BXZ1|TMX3_MOUSE	Tmx3	8	10	4400000	0.0101			sp|Q8VBZ3|CLPT1_MOUSE	Clptm1	7	7	2300000	0.00739		sp|O70443|GNAZ_MOUSE	Gnaz
	sp|Q8BWT1|THIM_MOUSE	Acaa2	4	4	170000	0.000989			sp|Q62048|PEA15_MOUSE	Pea15	4	9	2200000	0.00546			sp|Q99JY9|ARP3_MOUSE	Actr3	4	7	3300000	0.0133			sp|Q62108|DLG4_MOUSE	Dlg4	8	8	4000000	0.00757			sp|Q8BLV3|SL9A7_MOUSE	Slc9a7	8	10	5600000	0.0129			sp|Q3UPL0|SC31A_MOUSE	Sec31a	7	7	1000000	0.00327		sp|P35821|PTN1_MOUSE	Ptpn1
	sp|O88844|IDHC_MOUSE	Idh1	4	4	270000	0.00162			sp|P53994|RAB2A_MOUSE	Rab2a	4	9	13000000	0.032			sp|P49443|PPM1A_MOUSE	Ppm1a	4	7	1500000	0.00593			sp|P17182|ENOA_MOUSE	Eno1	8	8	4100000	0.00774			sp|Q9DAW9|CNN3_MOUSE	Cnn3	8	10	3600000	0.00832			tr|Q3ZAQ4|Q3ZAQ4_MOUSE	Atg9a	7	7	4000000	0.0127		sp|Q8CGK3|LONM_MOUSE	Lonp1
	sp|Q5SRX1|TM1L2_MOUSE	Tom1l2	4	4	370000	0.00221			sp|P62835|RAP1A_MOUSE	Rap1a	4	9	11000000	0.0264			sp|O70166|STMN3_MOUSE	Stmn3	4	7	4000000	0.0157			sp|Q8BL66|EEA1_MOUSE	Eea1	8	8	1800000	0.00341			tr|Q8C048|Q8C048_MOUSE	Atp2b3	8	9	2400000	0.00543			sp|Q9CS84|NRX1A_MOUSE	Nrxn1	7	7	2200000	0.00711		sp|Q9QY76|VAPB_MOUSE	Vapb
	sp|O70443|GNAZ_MOUSE	Gnaz	4	4	380000	0.00226			sp|Q9JJV2|PROF2_MOUSE	Pfn2	4	9	10000000	0.0261			sp|Q8R464|CADM4_MOUSE	Cadm4	4	6	4900000	0.0193			sp|Q8CIN4|PAK2_MOUSE	Pak2	8	8	15000000	0.0289			sp|Q61316|HSP74_MOUSE	Hspa4	8	9	1800000	0.00415			sp|P22892|AP1G1_MOUSE	Ap1g1	7	7	1200000	0.00394		sp|Q6VNS1|NTRK3_MOUSE	Ntrk3
	sp|O35405|PLD3_MOUSE	Pld3	4	4	470000	0.00277			sp|Q99L43|CDS2_MOUSE	Cds2	4	8	8400000	0.0212			sp|Q9JJV2|PROF2_MOUSE	Pfn2	4	6	3200000	0.0125			sp|P05132|KAPCA_MOUSE	Prkaca	8	8	2600000	0.005			sp|O35643|AP1B1_MOUSE	Ap1b1	8	9	2600000	0.00611			sp|Q9Z127|LAT1_MOUSE	Slc7a5	6	30	24000000	0.0781		sp|Q78JW9|UBFD1_MOUSE	Ubfd1
	sp|P16125|LDHB_MOUSE	Ldhb	4	4	370000	0.00217			sp|Q9CQX2|CYB5B_MOUSE	Cyb5b	4	8	12000000	0.0302			sp|P35486|ODPA_MOUSE	Pdha1	4	6	3200000	0.0127			sp|P0C192|LRC4B_MOUSE	Lrrc4b	8	8	9600000	0.0182			sp|Q3UZV7|K132L_MOUSE		8	9	5400000	0.0124			sp|P35803|GPM6B_MOUSE	Gpm6b	6	23	37000000	0.12		sp|O88447|KLC1_MOUSE	Klc1
	sp|Q8C525|M21D2_MOUSE	Mb21d2	4	4	200000	0.0012			sp|Q64433|CH10_MOUSE	Hspe1	4	8	18000000	0.0465			sp|P61087|UBE2K_MOUSE	Ube2k	4	6	2100000	0.00837			sp|Q3UZV7|K132L_MOUSE		8	8	5300000	0.01			sp|Q62165|DAG1_MOUSE	Dag1	8	9	4000000	0.00924			sp|Q9R0Q3|TMED2_MOUSE	Tmed2	6	22	9000000	0.0288		sp|Q8C0E2|VP26B_MOUSE	Vps26b
	sp|P10630|IF4A2_MOUSE	Eif4a2	4	4	200000	0.00116			sp|P99027|RLA2_MOUSE	Rplp2	4	7	25000000	0.0635			sp|Q00493|CBPE_MOUSE	Cpe	4	6	2900000	0.0113			sp|Q9WV34|MPP2_MOUSE	Mpp2	8	8	2700000	0.00506			sp|Q05920|PYC_MOUSE	Pc	8	9	2100000	0.00485			sp|P97797|SHPS1_MOUSE	Sirpa	6	17	29000000	0.0938		sp|Q99LI8|HGS_MOUSE	Hgs
	sp|P58281|OPA1_MOUSE	Opa1	4	4	230000	0.00133			sp|P51880|FABP7_MOUSE	Fabp7	4	7	9400000	0.0237			sp|P39688|FYN_MOUSE	Fyn	4	6	630000	0.00251			sp|Q3UHD6|SNX27_MOUSE	Snx27	8	8	4100000	0.00788			sp|Q8BTS4|NUP54_MOUSE	Nup54	8	8	3800000	0.0087			sp|P18572|BASI_MOUSE	Bsg	6	16	20000000	0.0625		sp|P56371|RAB4A_MOUSE	Rab4a
	sp|P19096|FAS_MOUSE	Fasn	4	4	210000	0.00123			tr|Q6DFY2|Q6DFY2_MOUSE	Opcml	4	7	36000000	0.0906			sp|Q920E5|FPPS_MOUSE	Fdps	4	5	1200000	0.00474			sp|Q02248|CTNB1_MOUSE	Ctnnb1	8	8	2100000	0.00405			sp|P14733|LMNB1_MOUSE	Lmnb1	8	8	1100000	0.00259			sp|Q9D1G1|RAB1B_MOUSE	Rab1b	6	14	34000000	0.11		sp|Q80TR1|AGRL1_MOUSE	Adgrl1
	sp|Q91ZA3|PCCA_MOUSE	Pcca	4	4	430000	0.00252			sp|Q9CZY3|UB2V1_MOUSE	Ube2v1	4	7	110000000	0.28			sp|Q5SRX1|TM1L2_MOUSE	Tom1l2	4	5	800000	0.00319			sp|P18572|BASI_MOUSE	Bsg	7	23	48000000	0.0923			sp|Q9QYA2|TOM40_MOUSE	Tomm40	8	8	5800000	0.0134			sp|P97765|WBP2_MOUSE	Wbp2	6	14	4000000	0.0128		sp|P54754|EPHB3_MOUSE	Ephb3
	tr|Q91VA7|Q91VA7_MOUSE	Idh3b	4	4	260000	0.00156			sp|P61211|ARL1_MOUSE	Arl1	4	7	2500000	0.00631			sp|O35609|SCAM3_MOUSE	Scamp3	4	5	990000	0.00392			sp|P59279|RAB2B_MOUSE	Rab2b	7	21	97000000	0.19			sp|Q91XM9|DLG2_MOUSE	Dlg2	8	8	2800000	0.0065			sp|P17742|PPIA_MOUSE	Ppia	6	14	36000000	0.11		sp|P60755|MDGA2_MOUSE	Mdga2
	sp|Q08331|CALB2_MOUSE	Calb2	4	4	470000	0.00278			sp|Q61171|PRDX2_MOUSE	Prdx2	4	7	3600000	0.00899			sp|Q62419|SH3G1_MOUSE	Sh3gl1	4	5	1500000	0.00583			sp|O54901|OX2G_MOUSE	Cd200	7	21	190000000	0.35			sp|B2RXS4|PLXB2_MOUSE	Plxnb2	8	8	1700000	0.00387			sp|P31648|SC6A1_MOUSE	Slc6a1	6	12	31000000	0.0988		sp|Q8K2Q9|SHOT1_MOUSE	Shtn1
	sp|Q8BX94|OSBL2_MOUSE	Osbpl2	4	4	250000	0.00148			sp|P10637|TAU_MOUSE	Mapt	4	7	3200000	0.00806			sp|P48320|DCE2_MOUSE	Gad2	4	5	1400000	0.0055			sp|Q9CZT8|RAB3B_MOUSE	Rab3b	7	16	52000000	0.0985			sp|Q8VE33|GD1L1_MOUSE	Gdap1l1	8	8	3100000	0.00716			sp|P19783|COX41_MOUSE	Cox4i1	6	12	24000000	0.0782		sp|Q9CVB6|ARPC2_MOUSE	Arpc2
	sp|Q9JHU4|DYHC1_MOUSE	Dync1h1	4	4	200000	0.00119			sp|Q62159|RHOC_MOUSE	Rhoc	4	7	17000000	0.0432			sp|O88531|PPT1_MOUSE	Ppt1	4	5	4000000	0.0159			sp|Q99KW9|TIP_MOUSE	Itfg1	7	15	24000000	0.0464			sp|Q61627|GRID1_MOUSE	Grid1	8	8	1900000	0.00431			sp|Q9CZT8|RAB3B_MOUSE	Rab3b	6	11	16000000	0.0512		sp|Q9WV92|E41L3_MOUSE	Epb41l3
	sp|Q9CQA3|SDHB_MOUSE	Sdhb	4	4	580000	0.00343			sp|P61982|1433G_MOUSE	Ywhag	4	6	14000000	0.0357			sp|P0DI97|NRX1B_MOUSE	Nrxn1	4	5	570000	0.00226			sp|Q9JJY3|NSMA2_MOUSE	Smpd3	7	14	8100000	0.0155			sp|P27612|PLAP_MOUSE	Plaa	8	8	1700000	0.00384			sp|P62835|RAP1A_MOUSE	Rap1a	6	11	14000000	0.0444		sp|Q9CQ22|LTOR1_MOUSE	Lamtor1
	sp|Q61699|HS105_MOUSE	Hsph1	4	4	270000	0.00161			sp|Q8BZ98|DYN3_MOUSE	Dnm3	4	6	2300000	0.00587			sp|P56812|PDCD5_MOUSE	Pdcd5	4	5	4400000	0.0172			sp|Q8VEH3|ARL8A_MOUSE	Arl8a	7	14	14000000	0.0261			sp|P56371|RAB4A_MOUSE	Rab4a	8	8	5100000	0.0118			sp|P53994|RAB2A_MOUSE	Rab2a	6	11	31000000	0.0979		sp|Q8BMI3|GGA3_MOUSE	Gga3
	sp|Q6VNS1|NTRK3_MOUSE	Ntrk3	4	4	440000	0.00261			sp|P35278|RAB5C_MOUSE	Rab5c	4	6	8000000	0.02			sp|P09671|SODM_MOUSE	Sod2	4	5	4600000	0.0184			sp|O70439|STX7_MOUSE	Stx7	7	14	13000000	0.0255			sp|P0C192|LRC4B_MOUSE	Lrrc4b	8	8	8000000	0.0184			sp|O35609|SCAM3_MOUSE	Scamp3	6	10	15000000	0.0474		sp|O35685|NUDC_MOUSE	Nudc
	sp|E9PUL5|PRRT2_MOUSE	Prrt2	3	40	1300000	0.00781			sp|P09055|ITB1_MOUSE	Itgb1	4	6	2200000	0.0055			sp|Q80ZJ1|RAP2A_MOUSE	Rap2a	4	5	1300000	0.00508			sp|Q9D1G1|RAB1B_MOUSE	Rab1b	7	13	30000000	0.0569			sp|P58281|OPA1_MOUSE	Opa1	8	8	1600000	0.00368			sp|Q61735|CD47_MOUSE	Cd47	6	10	13000000	0.0428		sp|P54923|ADPRH_MOUSE	Adprh
	tr|A2MY50|A2MY50_MOUSE		3	34	780000000	4.63			sp|Q91V41|RAB14_MOUSE	Rab14	4	6	5800000	0.0145			sp|P47867|SCG3_MOUSE	Scg3	4	5	350000	0.0014			tr|Q99M55|Q99M55_MOUSE	Atp6v0a1	7	12	28000000	0.0534			sp|P24270|CATA_MOUSE	Cat	8	8	3500000	0.00816			sp|Q8VEH3|ARL8A_MOUSE	Arl8a	6	10	8200000	0.026		sp|Q6NZC7|S23IP_MOUSE	Sec23ip
	sp|P01831|THY1_MOUSE	Thy1	3	28	85000000	0.5			sp|P62331|ARF6_MOUSE	Arf6	4	6	4400000	0.0111			sp|P14206|RSSA_MOUSE	Rpsa	4	5	1100000	0.00423			sp|P63328|PP2BA_MOUSE	Ppp3ca	7	12	20000000	0.039			sp|P97384|ANX11_MOUSE	Anxa11	8	8	2800000	0.00636			sp|Q9WV55|VAPA_MOUSE	Vapa	6	10	3600000	0.0115		sp|Q9WVK4|EHD1_MOUSE	Ehd1
	IGH1M_MOUSE	Ighg1	3	27	270000000	1.6			sp|P09671|SODM_MOUSE	Sod2	4	6	4800000	0.012			sp|Q9R0Y5|KAD1_MOUSE	Ak1	4	5	1700000	0.00687			sp|Q91VR2|ATPG_MOUSE	Atp5c1	7	12	14000000	0.027			sp|Q76MZ3|2AAA_MOUSE	Ppp2r1a	8	8	2000000	0.0046			sp|Q62048|PEA15_MOUSE	Pea15	6	10	4200000	0.0135		sp|Q91ZA3|PCCA_MOUSE	Pcca
	sp|Q91ZZ3|SYUB_MOUSE	Sncb	3	26	410000000	2.44			sp|O70492|SNX3_MOUSE	Snx3	4	6	4800000	0.012			sp|Q62393|TPD52_MOUSE	Tpd52	4	5	890000	0.00352			sp|P17742|PPIA_MOUSE	Ppia	7	12	31000000	0.0597			sp|Q99PU5|ACBG1_MOUSE	Acsbg1	8	8	1200000	0.00271			sp|Q99NB8|UBQL4_MOUSE	Ubqln4	6	10	4300000	0.0136		tr|V9GX34|V9GX34_MOUSE	Csmd2
	sp|P60766|CDC42_MOUSE	Cdc42	3	14	2200000	0.0131			sp|P60335|PCBP1_MOUSE	Pcbp1	4	6	2100000	0.00535			sp|P29341|PABP1_MOUSE	Pabpc1	4	5	510000	0.00203			sp|Q9D1D4|TMEDA_MOUSE	Tmed10	7	11	15000000	0.0282			sp|Q8JZN5|ACAD9_MOUSE	Acad9	8	8	1600000	0.0037			sp|P0DP27|CALM2_MOUSE	Calm2	6	9	12000000	0.0392		sp|Q811Q9|PCY1B_MOUSE	Pcyt1b
	sp|Q9CQ92|FIS1_MOUSE	Fis1	3	13	2300000	0.0137			sp|P61750|ARF4_MOUSE	Arf4	4	6	3400000	0.00843			tr|B8JJG7|B8JJG7_MOUSE	Tfg	4	5	3600000	0.0141			sp|P58021|TM9S2_MOUSE	Tm9sf2	7	11	8300000	0.0158			sp|P56818|BACE1_MOUSE	Bace1	8	8	5400000	0.0125			sp|P48318|DCE1_MOUSE	Gad1	6	9	2100000	0.00667		sp|O88844|IDHC_MOUSE	Idh1
	sp|Q8R4C2|RUFY2_MOUSE	Rufy2	3	12	4800000	0.0282			sp|Q62523|ZYX_MOUSE	Zyx	4	6	2400000	0.00591			sp|Q8CGK3|LONM_MOUSE	Lonp1	4	5	470000	0.00185			sp|Q99NB8|UBQL4_MOUSE	Ubqln4	7	11	4600000	0.00867			sp|Q9JLB0|MPP6_MOUSE	Mpp6	8	8	1900000	0.00429			sp|Q9CPQ3|TOM22_MOUSE	Tomm22	6	9	3400000	0.0107		sp|Q8C080|SNX16_MOUSE	Snx16
	sp|P48455|PP2BC_MOUSE	Ppp3cc	3	12	4900000	0.0288			sp|Q6PHS9|CA2D2_MOUSE	Cacna2d2	4	6	6100000	0.0153			sp|O88447|KLC1_MOUSE	Klc1	4	5	430000	0.00169			sp|Q8BFT9|SVOP_MOUSE	Svop	7	11	11000000	0.0208			sp|Q99PJ0|NTRI_MOUSE	Ntm	7	28	76000000	0.18			sp|P97450|ATP5J_MOUSE	Atp5j	6	9	21000000	0.0684		sp|Q8R1N4|NUDC3_MOUSE	Nudcd3
	sp|Q9JKD3|SCAM5_MOUSE	Scamp5	3	11	5400000	0.0318			sp|P63085|MK01_MOUSE	Mapk1	4	6	5700000	0.0143			sp|Q62523|ZYX_MOUSE	Zyx	4	5	990000	0.00392			sp|Q63850|NUP62_MOUSE	Nup62	7	10	11000000	0.02			sp|Q8BSL7|ARF2_MOUSE	Arf2	7	24	220000000	0.52			sp|P68510|1433F_MOUSE	Ywhah	6	9	5400000	0.0173		sp|Q924N4|S12A6_MOUSE	Slc12a6
	tr|Q8C7C3|Q8C7C3_MOUSE	Tpm3	3	10	2300000	0.0134			sp|Q07813|BAX_MOUSE	Bax	4	5	900000	0.00226			sp|Q9WUM5|SUCA_MOUSE	Suclg1	4	5	470000	0.00187			sp|P97825|JUPI1_MOUSE	JPT1	7	10	8600000	0.0164			sp|O35874|SATT_MOUSE	Slc1a4	7	21	45000000	0.1			sp|Q7TN29|SMAP2_MOUSE	Smap2	6	9	6500000	0.0207		sp|P35822|PTPRK_MOUSE	Ptprk
	sp|P55821|STMN2_MOUSE	Stmn2	3	10	3600000	0.0213			sp|Q6P1D5|SE6L1_MOUSE	Sez6l	4	5	1400000	0.00346			sp|Q9R1J0|NSDHL_MOUSE	Nsdhl	4	5	1600000	0.00639			sp|Q9D6F9|TBB4A_MOUSE	Tubb4a	7	10	21000000	0.0403			sp|Q60931|VDAC3_MOUSE	Vdac3	7	19	61000000	0.14			sp|Q61171|PRDX2_MOUSE	Prdx2	6	9	5800000	0.0185		sp|A2APX8|SCN1A_MOUSE	Scn1a
	sp|P19536|COX5B_MOUSE	Cox5b	3	10	3300000	0.0196			sp|Q9CPQ3|TOM22_MOUSE	Tomm22	4	5	1500000	0.00381			sp|P42932|TCPQ_MOUSE	Cct8	4	5	550000	0.00217			sp|Q8BNY6|NCS1_MOUSE	Ncs1	7	10	9900000	0.0189			sp|P14094|AT1B1_MOUSE	Atp1b1	7	19	260000000	0.61			sp|P97825|JUPI1_MOUSE	JPT1	6	8	5300000	0.0171		sp|Q99MR3|S12A9_MOUSE	Slc12a9
	sp|P46414|CDN1B_MOUSE	Cdkn1b	3	9	730000	0.00432			sp|Q8C129|LCAP_MOUSE	Lnpep	4	5	500000	0.00126			sp|P31938|MP2K1_MOUSE	Map2k1	4	5	650000	0.00256			sp|Q99KF1|TMED9_MOUSE	Tmed9	7	10	16000000	0.0309			sp|Q91X97|NCALD_MOUSE	Ncald	7	16	28000000	0.065			sp|P99027|RLA2_MOUSE	Rplp2	6	8	23000000	0.0725		sp|Q9EPR5|SORC2_MOUSE	Sorcs2
	sp|Q62186|SSRD_MOUSE	Ssr4	3	9	1800000	0.0106			sp|Q9WV92|E41L3_MOUSE	Epb41l3	4	5	740000	0.00186			sp|O70493|SNX12_MOUSE	Snx12	4	5	1500000	0.0058			sp|P57716|NICA_MOUSE	Ncstn	7	10	7700000	0.0146			sp|Q99KW9|TIP_MOUSE	Itfg1	7	16	25000000	0.0568			sp|Q9CQC9|SAR1B_MOUSE	Sar1b	6	8	2500000	0.00799		sp|Q3UH93|PLXD1_MOUSE	Plxnd1
	sp|Q8BJI1|S6A17_MOUSE	Slc6a17	3	9	640000	0.00378			sp|P61021|RAB5B_MOUSE	Rab5b	4	5	4300000	0.0109			sp|P61750|ARF4_MOUSE	Arf4	4	5	1600000	0.00617			tr|Q3ZAQ4|Q3ZAQ4_MOUSE	Atg9a	7	10	12000000	0.0234			sp|Q9R0Q3|TMED2_MOUSE	Tmed2	7	16	9600000	0.0222			sp|Q8C0L0|TMX4_MOUSE	Tmx4	6	8	3900000	0.0124		sp|P20444|KPCA_MOUSE	Prkca
	tr|Q6PGJ3|Q6PGJ3_MOUSE	L1cam	3	8	4900000	0.029			sp|Q8R332|NUP58_MOUSE	Nup58	4	5	3800000	0.00943			sp|Q4VAA2|CDV3_MOUSE	Cdv3	4	5	390000	0.00156			sp|Q8CBH5|MFSD6_MOUSE	Mfsd6	7	10	5600000	0.0107			sp|Q9D593|VATE2_MOUSE	Atp6v1e2	7	15	27000000	0.063			sp|Q9CRY7|GDPD1_MOUSE	Gdpd1	6	8	2400000	0.00777		sp|Q08331|CALB2_MOUSE	Calb2
	tr|Q6P1J1|Q6P1J1_MOUSE	Crmp1	3	8	6400000	0.0381			sp|Q9R0P9|UCHL1_MOUSE	Uchl1	4	5	3800000	0.0096			sp|Q07813|BAX_MOUSE	Bax	4	4	680000	0.00268			sp|P51906|EAA3_MOUSE	Slc1a1	7	9	6800000	0.013			sp|P19783|COX41_MOUSE	Cox4i1	7	14	33000000	0.0768			sp|P56371|RAB4A_MOUSE	Rab4a	6	8	5200000	0.0165		sp|Q07409|CNTN3_MOUSE	Cntn3
	sp|P62331|ARF6_MOUSE	Arf6	3	8	1100000	0.00668			sp|Q8CAY6|THIC_MOUSE	Acat2	4	5	510000	0.00129			sp|O08547|SC22B_MOUSE	Sec22b	4	4	1100000	0.00433			sp|Q8K2C7|OS9_MOUSE	Os9	7	9	4200000	0.00806			sp|Q9D1G1|RAB1B_MOUSE	Rab1b	7	13	30000000	0.0696			sp|Q9R0P9|UCHL1_MOUSE	Uchl1	6	8	4600000	0.0148		sp|O70228|ATP9A_MOUSE	Atp9a
	sp|Q9D2M8|UB2V2_MOUSE	Ube2v2	3	8	920000	0.00544			sp|P48320|DCE2_MOUSE	Gad2	4	5	1500000	0.00387			sp|Q61081|CDC37_MOUSE	Cdc37	4	4	950000	0.00377			sp|Q9D1K2|VATF_MOUSE	Atp6v1f	7	9	19000000	0.0368			sp|O55022|PGRC1_MOUSE	Pgrmc1	7	13	29000000	0.0661			sp|Q9CQQ7|AT5F1_MOUSE	Atp5f1	6	8	6100000	0.0194		sp|Q9JIS8|S12A4_MOUSE	Slc12a4
	sp|P61087|UBE2K_MOUSE	Ube2k	3	8	2400000	0.014			sp|P30416|FKBP4_MOUSE	Fkbp4	4	5	740000	0.00185			sp|Q99JB2|STML2_MOUSE	Stoml2	4	4	440000	0.00174			sp|Q61411|RASH_MOUSE	Hras	7	9	8000000	0.0152			sp|Q61735|CD47_MOUSE	Cd47	7	13	26000000	0.0604			sp|Q03517|SCG2_MOUSE	Scg2	6	8	2000000	0.00626		sp|Q8BGQ7|SYAC_MOUSE	Aars
	sp|Q921J2|RHEB_MOUSE	Rheb	3	8	2800000	0.0164			sp|P70168|IMB1_MOUSE	Kpnb1	4	5	1200000	0.00295			sp|Q3UHJ0|AAK1_MOUSE	Aak1	4	4	890000	0.00353			sp|Q9JLB0|MPP6_MOUSE	Mpp6	7	9	2200000	0.00412			sp|P61089|UBE2N_MOUSE	Ube2n	7	13	24000000	0.0562			sp|Q8BLV3|SL9A7_MOUSE	Slc9a7	6	7	2400000	0.00765		sp|Q8BSL7|ARF2_MOUSE	Arf2
	sp|P11438|LAMP1_MOUSE	Lamp1	3	8	1000000	0.00598			sp|Q9D164|FXYD6_MOUSE	Fxyd6	4	5	4300000	0.0108			sp|Q7M6Y3|PICAL_MOUSE	Picalm	4	4	790000	0.00313			sp|Q6PHS9|CA2D2_MOUSE	Cacna2d2	7	9	6200000	0.0119			sp|Q9CZT8|RAB3B_MOUSE	Rab3b	7	12	32000000	0.0735			sp|B0V2N1|PTPRS_MOUSE	Ptprs	6	7	1000000	0.0032		sp|P35802|GPM6A_MOUSE	Gpm6a
	sp|P31650|S6A11_MOUSE	Slc6a11	3	8	4000000	0.0237			sp|Q8BKC5|IPO5_MOUSE	Ipo5	4	5	360000	0.0009			sp|D3YZP9|CCDC6_MOUSE	Ccdc6	4	4	580000	0.00229			sp|Q8C7K6|PCYXL_MOUSE	Pcyox1l	7	8	9700000	0.0185			sp|Q9D1D4|TMEDA_MOUSE	Tmed10	7	12	20000000	0.0452			sp|Q09143|CTR1_MOUSE	Slc7a1	6	7	3500000	0.0112		sp|P18572|BASI_MOUSE	Bsg
	sp|Q61553|FSCN1_MOUSE	Fscn1	3	7	1500000	0.00878			sp|P0DI97|NRX1B_MOUSE	Nrxn1	4	5	2000000	0.00504			sp|O70439|STX7_MOUSE	Stx7	4	4	1700000	0.00658			sp|P61021|RAB5B_MOUSE	Rab5b	7	8	21000000	0.0398			sp|P97765|WBP2_MOUSE	Wbp2	7	11	4500000	0.0103			sp|Q8BK64|AHSA1_MOUSE	Ahsa1	6	7	4300000	0.0138		sp|O54901|OX2G_MOUSE	Cd200
	sp|O70251|EF1B_MOUSE	Eef1b	3	7	1000000	0.00619			sp|O08795|GLU2B_MOUSE	Prkcsh	4	5	2600000	0.0066			sp|O70252|HMOX2_MOUSE	Hmox2	4	4	960000	0.00379			sp|Q9JLB9|NECT3_MOUSE	Nectin3	7	8	7600000	0.0144			sp|Q9DB20|ATPO_MOUSE	Atp5o	7	11	20000000	0.0462			sp|Q8BLQ9|CADM2_MOUSE	Cadm2	6	7	9200000	0.0294		sp|P97797|SHPS1_MOUSE	Sirpa
	sp|P53994|RAB2A_MOUSE	Rab2a	3	7	4900000	0.0291			sp|Q05186|RCN1_MOUSE	Rcn1	4	5	990000	0.00248			sp|Q8BL86|MBLC2_MOUSE	Mblac2	4	4	700000	0.00276			sp|O54734|OST48_MOUSE	Ddost	7	8	4900000	0.00934			sp|P70206|PLXA1_MOUSE	Plxna1	7	11	6100000	0.014			sp|Q9R0Y5|KAD1_MOUSE	Ak1	6	7	1700000	0.00543		sp|Q61735|CD47_MOUSE	Cd47
	sp|Q8VE33|GD1L1_MOUSE	Gdap1l1	3	7	1200000	0.00713			sp|Q08122|TLE3_MOUSE	Tle3	4	5	620000	0.00157			sp|P05132|KAPCA_MOUSE	Prkaca	4	4	940000	0.00373			sp|Q09143|CTR1_MOUSE	Slc7a1	7	8	6200000	0.0118			sp|Q9DAM7|TM263_MOUSE	Tmem263	7	10	9700000	0.0225			sp|P57716|NICA_MOUSE	Ncstn	6	7	2700000	0.00853		sp|Q80Z24|NEGR1_MOUSE	Negr1
	sp|Q9R013|CATF_MOUSE	Ctsf	3	7	2600000	0.0156			sp|Q9R0Q6|ARC1A_MOUSE	Arpc1a	4	5	2000000	0.00504			sp|O35643|AP1B1_MOUSE	Ap1b1	4	4	590000	0.00233			sp|Q8BLF1|NCEH1_MOUSE	Nceh1	7	8	4600000	0.00868			sp|Q9CZU6|CISY_MOUSE	Cs	7	10	3500000	0.00813			sp|Q60597|ODO1_MOUSE	Ogdh	6	7	910000	0.00289		sp|Q9D1G1|RAB1B_MOUSE	Rab1b
	tr|E0CYM8|E0CYM8_MOUSE	Sirpa	3	7	4600000	0.0274			sp|P61226|RAP2B_MOUSE	Rap2b	4	5	2300000	0.00573			sp|P23819|GRIA2_MOUSE	Gria2	4	4	350000	0.00139			sp|Q9EPR5|SORC2_MOUSE	Sorcs2	7	8	4200000	0.0079			sp|P97825|JUPI1_MOUSE	JPT1	7	9	9000000	0.0207			sp|P47738|ALDH2_MOUSE	Aldh2	6	7	1500000	0.00471		sp|Q8BIF0|C99L2_MOUSE	Cd99l2
	sp|Q64433|CH10_MOUSE	Hspe1	3	7	2200000	0.0133			sp|Q99JY9|ARP3_MOUSE	Actr3	4	5	2100000	0.0053			sp|Q9QXY6|EHD3_MOUSE	Ehd3	4	4	450000	0.00179			sp|Q60634|FLOT2_MOUSE	Flot2	7	8	7200000	0.0136			sp|P47867|SCG3_MOUSE	Scg3	7	9	2300000	0.00536			sp|Q9D8Y0|EFHD2_MOUSE	Efhd2	6	7	1700000	0.00534		sp|Q9D593|VATE2_MOUSE	Atp6v1e2
	sp|Q9R1Q8|TAGL3_MOUSE	Tagln3	3	7	1600000	0.00928			sp|Q8VDW0|DX39A_MOUSE	Ddx39a	4	5	2000000	0.00512			sp|Q922S4|PDE2A_MOUSE	Pde2a	4	4	1300000	0.00504			sp|D3YVF0|AKAP5_MOUSE	Akap5	7	8	2400000	0.00454			sp|Q8K2C7|OS9_MOUSE	Os9	7	9	3200000	0.00739			sp|P15532|NDKA_MOUSE	Nme1	6	7	3200000	0.0103		sp|P53994|RAB2A_MOUSE	Rab2a
	sp|P68037|UB2L3_MOUSE	Ube2l3	3	7	1000000	0.00612			sp|Q9CQI6|COTL1_MOUSE	Cotl1	4	5	1100000	0.00281			tr|Q8C048|Q8C048_MOUSE	Atp2b3	4	4	880000	0.00347			sp|P97798|NEO1_MOUSE	Neo1	7	8	1900000	0.00368			sp|O70252|HMOX2_MOUSE	Hmox2	7	9	2900000	0.00669			sp|P39688|FYN_MOUSE	Fyn	6	7	2800000	0.00878		sp|P68510|1433F_MOUSE	Ywhah
	sp|Q9DB60|PGFS_MOUSE	Fam213b	3	7	3800000	0.0225			sp|Q9QY76|VAPB_MOUSE	Vapb	4	5	1900000	0.00467			sp|P40124|CAP1_MOUSE	Cap1	4	4	410000	0.00161			sp|O70443|GNAZ_MOUSE	Gnaz	7	8	4600000	0.00876			sp|Q9DBH5|LMAN2_MOUSE	Lman2	7	9	9700000	0.0223			sp|Q9DC16|ERGI1_MOUSE	Ergic1	6	7	4200000	0.0134		sp|Q9CZT8|RAB3B_MOUSE	Rab3b
	sp|Q6P069|SORCN_MOUSE	Sri	3	7	720000	0.00428			sp|Q9WV91|FPRP_MOUSE	Ptgfrn	4	5	600000	0.00152			sp|Q9CQN1|TRAP1_MOUSE	Trap1	4	4	520000	0.00205			sp|Q9JL56|GDE1_MOUSE	Gde1	7	8	4000000	0.00755			sp|P61226|RAP2B_MOUSE	Rap2b	7	9	11000000	0.026			sp|Q8C129|LCAP_MOUSE	Lnpep	6	6	1400000	0.00461		sp|P62835|RAP1A_MOUSE	Rap1a
	sp|P11404|FABPH_MOUSE	Fabp3	3	7	530000	0.00314			sp|Q9WVK4|EHD1_MOUSE	Ehd1	4	5	1000000	0.00263			sp|P70404|IDHG1_MOUSE	Idh3g	4	4	580000	0.00232			sp|Q61598|GDIB_MOUSE	Gdi2	7	7	1900000	0.00363			sp|P35486|ODPA_MOUSE	Pdha1	7	9	14000000	0.0316			sp|Q60629|EPHA5_MOUSE	Epha5	6	6	1100000	0.00361		sp|P62962|PROF1_MOUSE	Pfn1
	sp|Q9D164|FXYD6_MOUSE	Fxyd6	3	6	3700000	0.0218			sp|P15209|NTRK2_MOUSE	Ntrk2	4	5	1500000	0.00377			sp|Q91V12|BACH_MOUSE	Acot7	4	4	1000000	0.00414			sp|Q8QZT1|THIL_MOUSE	Acat1	7	7	3600000	0.00679			sp|Q7M6Y3|PICAL_MOUSE	Picalm	7	8	4100000	0.00937			sp|Q9QXS6|DREB_MOUSE	Dbn1	6	6	1900000	0.00611		sp|P97450|ATP5J_MOUSE	Atp5j
	sp|Q62420|SH3G2_MOUSE	Sh3gl2	3	6	1000000	0.00598			sp|Q6WVG3|KCD12_MOUSE	Kctd12	4	5	590000	0.00147			sp|Q8BRF7|SCFD1_MOUSE	Scfd1	4	4	440000	0.00174			sp|Q61627|GRID1_MOUSE	Grid1	7	7	2700000	0.00521			sp|Q8R317|UBQL1_MOUSE	Ubqln1	7	8	4600000	0.0105			sp|Q6P6J9|TXD15_MOUSE	Txndc15	6	6	1800000	0.00564		sp|Q9R257|HEBP1_MOUSE	Hebp1
	sp|Q9CQZ1|HSBP1_MOUSE	Hsbp1	3	6	1200000	0.00684			sp|P11404|FABPH_MOUSE	Fabp3	4	5	820000	0.00206			sp|Q8BYI8|F234B_MOUSE	Fam234b	4	4	700000	0.00277			sp|Q02053|UBA1_MOUSE	Uba1	7	7	3500000	0.00663			sp|Q9CRY7|GDPD1_MOUSE	Gdpd1	7	8	2700000	0.00628			sp|O35643|AP1B1_MOUSE	Ap1b1	6	6	1700000	0.00529		sp|P08752|GNAI2_MOUSE	Gnai2
	sp|Q8HW98|IGLO5_MOUSE	Iglon5	3	6	410000	0.0024			sp|O89053|COR1A_MOUSE	Coro1a	4	5	710000	0.00179			sp|P54754|EPHB3_MOUSE	Ephb3	4	4	270000	0.00107			sp|Q9WU60|ATRN_MOUSE	Atrn	7	7	1900000	0.00366			sp|Q8BLF1|NCEH1_MOUSE	Nceh1	7	8	4300000	0.00984			sp|P14733|LMNB1_MOUSE	Lmnb1	6	6	920000	0.00293		sp|P99027|RLA2_MOUSE	Rplp2
	sp|Q9CZU6|CISY_MOUSE	Cs	3	6	1000000	0.00604			sp|Q8R105|VP37C_MOUSE	Vps37c	4	4	1500000	0.00368			sp|P30416|FKBP4_MOUSE	Fkbp4	4	4	350000	0.00139			sp|O88342|WDR1_MOUSE	Wdr1	7	7	3000000	0.0058			sp|P57716|NICA_MOUSE	Ncstn	7	8	5400000	0.0126			sp|Q921M7|FA49B_MOUSE	Fam49b	6	6	2700000	0.00861		sp|Q8R464|CADM4_MOUSE	Cadm4
	sp|Q9ERT9|PPR1A_MOUSE	Ppp1r1a	3	6	1400000	0.00848			sp|Q03137|EPHA4_MOUSE	Epha4	4	4	520000	0.0013			sp|P35821|PTN1_MOUSE	Ptpn1	4	4	540000	0.00215			sp|O88307|SORL_MOUSE	Sorl1	7	7	1600000	0.00306			sp|P70297|STAM1_MOUSE	Stam	7	8	2500000	0.00567			sp|Q8K400|STXB5_MOUSE	Stxbp5	6	6	1200000	0.00378		sp|Q8VHW2|CCG8_MOUSE	Cacng8
	sp|P61226|RAP2B_MOUSE	Rap2b	3	6	2100000	0.0124			sp|Q80UU9|PGRC2_MOUSE	Pgrmc2	4	4	1200000	0.00305			sp|Q8VDP6|CDIPT_MOUSE	Cdipt	4	4	1100000	0.00451			sp|Q811Q9|PCY1B_MOUSE	Pcyt1b	7	7	3800000	0.00723			sp|P97798|NEO1_MOUSE	Neo1	7	8	980000	0.00226			sp|Q99PU5|ACBG1_MOUSE	Acsbg1	6	6	970000	0.0031		sp|P58021|TM9S2_MOUSE	Tm9sf2
	sp|Q6PCX7|RGMA_MOUSE	Rgma	3	5	510000	0.00299			sp|Q99JB2|STML2_MOUSE	Stoml2	4	4	570000	0.00144			sp|P47941|CRKL_MOUSE	Crkl	4	4	720000	0.00284			sp|Q8C0E2|VP26B_MOUSE	Vps26b	7	7	4200000	0.00808			sp|P62962|PROF1_MOUSE	Pfn1	7	8	5700000	0.0131			sp|P70175|DLG3_MOUSE	Dlg3	6	6	1100000	0.00341		sp|Q99PT1|GDIR1_MOUSE	Arhgdia
	sp|Q03137|EPHA4_MOUSE	Epha4	3	5	250000	0.00149			sp|Q6PCX7|RGMA_MOUSE	Rgma	4	4	980000	0.00247			sp|P16125|LDHB_MOUSE	Ldhb	4	4	640000	0.00254			sp|A2APX8|SCN1A_MOUSE	Scn1a	7	7	3100000	0.00582			sp|Q61739|ITA6_MOUSE	Itga6	7	8	1600000	0.0038			sp|Q61598|GDIB_MOUSE	Gdi2	6	6	1300000	0.00428		sp|P62331|ARF6_MOUSE	Arf6
	sp|Q99JX3|GORS2_MOUSE	Gorasp2	3	5	380000	0.00227			sp|Q6KAU4|MB12B_MOUSE	Mvb12b	4	4	750000	0.00188			sp|Q9Z1R2|BAG6_MOUSE	Bag6	4	4	320000	0.00126			sp|Q6PDS3|SARM1_MOUSE	Sarm1	7	7	1800000	0.00351			sp|Q8BFZ9|ERLN2_MOUSE	Erlin2	7	8	1900000	0.00439			sp|Q8BFT9|SVOP_MOUSE	Svop	6	6	2800000	0.00886		sp|O35633|VIAAT_MOUSE	Slc32a1
	sp|Q9WTX5|SKP1_MOUSE	Skp1	3	5	530000	0.00315			sp|Q61081|CDC37_MOUSE	Cdc37	4	4	2000000	0.00504			sp|P35235|PTN11_MOUSE	Ptpn11	4	4	380000	0.0015			sp|P63080|GBRB3_MOUSE	Gabrb3	7	7	1900000	0.00359			sp|Q8CBH5|MFSD6_MOUSE	Mfsd6	7	8	2400000	0.00546			sp|Q8K221|ARFP2_MOUSE	Arfip2	6	6	1700000	0.00529		sp|Q9DC16|ERGI1_MOUSE	Ergic1
	sp|Q99L43|CDS2_MOUSE	Cds2	3	5	2800000	0.0168			sp|Q9Z1Z2|STRAP_MOUSE	Strap	4	4	500000	0.00125			sp|P54923|ADPRH_MOUSE	Adprh	4	4	800000	0.00319			sp|Q61739|ITA6_MOUSE	Itga6	7	7	1500000	0.00287			sp|O08795|GLU2B_MOUSE	Prkcsh	7	8	5100000	0.0117			sp|Q9Z110|P5CS_MOUSE	Aldh18a1	6	6	710000	0.00228		sp|P10649|GSTM1_MOUSE	Gstm1
	sp|Q8VDQ8|SIR2_MOUSE	Sirt2	3	5	590000	0.00347			sp|Q6P5E6|GGA2_MOUSE	Gga2	4	4	330000	0.000823			sp|O54865|GCYB1_MOUSE	Gucy1b3	4	4	650000	0.00257			sp|P22892|AP1G1_MOUSE	Ap1g1	7	7	2000000	0.00372			sp|Q921J2|RHEB_MOUSE	Rheb	7	8	6300000	0.0144			sp|Q8VE33|GD1L1_MOUSE	Gdap1l1	6	6	6800000	0.0217		sp|Q8R1V4|TMED4_MOUSE	Tmed4
	sp|Q8C0J2|A16L1_MOUSE	Atg16l1	3	5	220000	0.0013			sp|O70439|STX7_MOUSE	Stx7	4	4	2300000	0.00566			sp|P61226|RAP2B_MOUSE	Rap2b	4	4	1400000	0.00551			sp|Q9R0Q6|ARC1A_MOUSE	Arpc1a	7	7	3400000	0.0065			sp|O08579|EMD_MOUSE	Emd	7	8	4900000	0.0113			sp|Q9Z0H8|CLIP2_MOUSE	Clip2	6	6	2300000	0.00727		sp|Q80UU9|PGRC2_MOUSE	Pgrmc2
	sp|P47941|CRKL_MOUSE	Crkl	3	5	1300000	0.00742			sp|Q6RHR9|MAGI1_MOUSE	Magi1	4	4	530000	0.00134			sp|Q91ZR1|RAB4B_MOUSE	Rab4b	4	4	1400000	0.00573			sp|P62874|GBB1_MOUSE	Gnb1	6	76	1200000000	2.32			sp|Q63810|CANB1_MOUSE	Ppp3r1	7	7	8200000	0.019			sp|Q8CAQ8|MIC60_MOUSE	Immt	6	6	940000	0.003		sp|Q9CQD1|RAB5A_MOUSE	Rab5a
	sp|Q8K2C7|OS9_MOUSE	Os9	3	5	250000	0.00147			sp|Q6PCP5|MFF_MOUSE	Mff	4	4	680000	0.00171			sp|Q8BH24|TM9S4_MOUSE	Tm9sf4	4	4	970000	0.00383			sp|Q8BSL7|ARF2_MOUSE	Arf2	6	21	200000000	0.37			sp|Q9WV34|MPP2_MOUSE	Mpp2	7	7	2500000	0.00574			tr|Q80U83|Q80U83_MOUSE	Sec24c	6	6	1000000	0.00333		sp|Q9R0Q6|ARC1A_MOUSE	Arpc1a
	sp|Q8K3C3|LZIC_MOUSE	Lzic	3	5	560000	0.00333			sp|Q8BL86|MBLC2_MOUSE	Mblac2	4	4	690000	0.00174			sp|Q8JZN5|ACAD9_MOUSE	Acad9	4	4	490000	0.00194			sp|Q8R191|SNG3_MOUSE	Syngr3	6	21	230000000	0.45			sp|P0DI97|NRX1B_MOUSE	Nrxn1	7	7	3200000	0.00737			sp|B2RXS4|PLXB2_MOUSE	Plxnb2	6	6	1100000	0.00349		sp|Q7TQ95|LNP_MOUSE	Lnp
	sp|O35737|HNRH1_MOUSE	Hnrnph1	3	5	880000	0.00519			sp|O54865|GCYB1_MOUSE	Gucy1b3	4	4	1100000	0.00266			sp|Q3UEB3|PUF60_MOUSE	Puf60	4	4	430000	0.00171			sp|P17156|HSP72_MOUSE	Hspa2	6	20	120000000	0.23			sp|P51906|EAA3_MOUSE	Slc1a1	7	7	4500000	0.0104			sp|Q8BW96|KCC1D_MOUSE	Camk1d	6	6	2300000	0.00724		sp|Q8BZ98|DYN3_MOUSE	Dnm3
	sp|Q8VEM8|MPCP_MOUSE	Slc25a3	3	5	590000	0.00346			sp|Q8VDQ8|SIR2_MOUSE	Sirt2	4	4	2000000	0.00515			sp|P63085|MK01_MOUSE	Mapk1	4	4	350000	0.00138			sp|Q9R0Q3|TMED2_MOUSE	Tmed2	6	17	11000000	0.0206			sp|P29758|OAT_MOUSE	Oat	7	7	3300000	0.00769			sp|P30275|KCRU_MOUSE	Ckmt1	6	6	1700000	0.00548		sp|Q9QYC0|ADDA_MOUSE	Add1
	sp|P61211|ARL1_MOUSE	Arl1	3	5	200000	0.00118			sp|Q8K3C3|LZIC_MOUSE	Lzic	4	4	860000	0.00217			tr|Q99M55|Q99M55_MOUSE	Atp6v0a1	4	4	1100000	0.00444			sp|P54227|STMN1_MOUSE	Stmn1	6	17	84000000	0.16			sp|Q61301|CTNA2_MOUSE	Ctnna2	7	7	1800000	0.00406			sp|P06151|LDHA_MOUSE	Ldha	6	6	3400000	0.0108		sp|Q921J2|RHEB_MOUSE	Rheb
	sp|Q9DBS1|TMM43_MOUSE	Tmem43	3	5	180000	0.00107			sp|Q06890|CLUS_MOUSE	Clu	4	4	890000	0.00225			sp|Q8BWF0|SSDH_MOUSE	Aldh5a1	4	4	870000	0.00346			sp|P97797|SHPS1_MOUSE	Sirpa	6	16	46000000	0.0877			sp|Q09143|CTR1_MOUSE	Slc7a1	7	7	3600000	0.00838			sp|Q9JLB0|MPP6_MOUSE	Mpp6	6	6	1700000	0.00542		sp|Q99JY9|ARP3_MOUSE	Actr3
	sp|Q8BHK2|SCN3B_MOUSE	Scn3b	3	5	670000	0.00394			sp|Q62108|DLG4_MOUSE	Dlg4	4	4	5500000	0.0138			sp|Q8R0H9|GGA1_MOUSE	Gga1	4	4	380000	0.00151			sp|Q61735|CD47_MOUSE	Cd47	6	15	34000000	0.0646			sp|Q8C0E2|VP26B_MOUSE	Vps26b	7	7	3200000	0.00743			sp|P97384|ANX11_MOUSE	Anxa11	6	6	1300000	0.00406		sp|P61750|ARF4_MOUSE	Arf4
	sp|Q9CPT4|MYDGF_MOUSE	Mydgf	3	5	920000	0.00546			sp|P12367|KAP2_MOUSE	Prkar2a	4	4	1500000	0.00385			sp|Q9DBL9|ABHD5_MOUSE	Abhd5	4	4	330000	0.0013			sp|Q80Z24|NEGR1_MOUSE	Negr1	6	15	81000000	0.15			sp|Q5SRX1|TM1L2_MOUSE	Tom1l2	7	7	1600000	0.00369			sp|Q8R3V5|SHLB2_MOUSE	Sh3glb2	6	6	3200000	0.0103		sp|Q01405|SC23A_MOUSE	Sec23a
	sp|Q61171|PRDX2_MOUSE	Prdx2	3	5	980000	0.00582			sp|A2ALU4|SHRM2_MOUSE	Shroom2	4	4	460000	0.00117			sp|Q8R180|ERO1A_MOUSE	Ero1a	4	4	660000	0.00263			sp|O35609|SCAM3_MOUSE	Scamp3	6	14	52000000	0.0984			sp|P19096|FAS_MOUSE	Fasn	7	7	760000	0.00175			sp|P61161|ARP2_MOUSE	Actr2	6	6	2100000	0.00656		sp|Q91V12|BACH_MOUSE	Acot7
	sp|P15209|NTRK2_MOUSE	Ntrk2	3	5	260000	0.00155			sp|Q91ZR1|RAB4B_MOUSE	Rab4b	4	4	1400000	0.00352			sp|P58389|PTPA_MOUSE	Ptpa	4	4	450000	0.00179			sp|Q9D593|VATE2_MOUSE	Atp6v1e2	6	14	22000000	0.0424			sp|Q3UYC0|PPM1H_MOUSE	Ppm1h	7	7	2900000	0.00661			sp|P35585|AP1M1_MOUSE	Ap1m1	6	6	1300000	0.00419		sp|Q9JL56|GDE1_MOUSE	Gde1
	sp|Q62283|TSN7_MOUSE	Tspan7	3	5	1100000	0.0064			sp|Q62318|TIF1B_MOUSE	Trim28	4	4	540000	0.00136			sp|Q7TME0|PLPR4_MOUSE	Plppr4	4	4	280000	0.00111			sp|Q91X97|NCALD_MOUSE	Ncald	6	13	21000000	0.0403			tr|B1AWN6|B1AWN6_MOUSE	Scn2a	7	7	5200000	0.0121			sp|Q9CQA3|SDHB_MOUSE	Sdhb	6	6	3700000	0.0119		sp|Q99LX0|PARK7_MOUSE	Park7
	sp|P60335|PCBP1_MOUSE	Pcbp1	3	5	520000	0.0031			sp|Q7TME0|PLPR4_MOUSE	Plppr4	4	4	510000	0.00129			sp|Q91WC3|ACSL6_MOUSE	Acsl6	4	4	280000	0.0011			sp|O55022|PGRC1_MOUSE	Pgrmc1	6	13	41000000	0.0781			sp|Q60597|ODO1_MOUSE	Ogdh	7	7	1100000	0.00261			sp|P62874|GBB1_MOUSE	Gnb1	5	52	340000000	1.07		sp|Q61187|TS101_MOUSE	Tsg101
	sp|P45878|FKBP2_MOUSE	Fkbp2	3	5	2700000	0.0157			sp|O35737|HNRH1_MOUSE	Hnrnph1	4	4	1000000	0.00259			sp|B2RXS4|PLXB2_MOUSE	Plxnb2	4	4	310000	0.00123			sp|Q8BIF0|C99L2_MOUSE	Cd99l2	6	12	9400000	0.0178			tr|Q91VA7|Q91VA7_MOUSE	Idh3b	7	7	1900000	0.00438			sp|P35802|GPM6A_MOUSE	Gpm6a	5	34	210000000	0.68		sp|Q9CQA3|SDHB_MOUSE	Sdhb
	sp|O88342|WDR1_MOUSE	Wdr1	3	5	330000	0.00192			sp|Q71M36|CSPG5_MOUSE	Cspg5	4	4	570000	0.00142			sp|P56399|UBP5_MOUSE	Usp5	4	4	280000	0.00111			sp|P12787|COX5A_MOUSE	Cox5a	6	12	13000000	0.0242			sp|Q07113|MPRI_MOUSE	Igf2r	7	7	2200000	0.00497			sp|P62983|RS27A_MOUSE	Rps27a	5	25	98000000	0.31		sp|P35700|PRDX1_MOUSE	Prdx1
	sp|Q9ET30|TM9S3_MOUSE	Tm9sf3	3	5	1300000	0.00773			sp|Q9QUR8|SEM7A_MOUSE	Sema7a	4	4	700000	0.00177			sp|P17751|TPIS_MOUSE	Tpi1	4	4	890000	0.00352			sp|O35633|VIAAT_MOUSE	Slc32a1	6	12	19000000	0.037			sp|P61161|ARP2_MOUSE	Actr2	7	7	3400000	0.00786			sp|Q99PJ0|NTRI_MOUSE	Ntm	5	23	64000000	0.21		sp|O35405|PLD3_MOUSE	Pld3
	sp|P63040|CPLX1_MOUSE	Cplx1	3	5	10000000	0.061			sp|Q99JX3|GORS2_MOUSE	Gorasp2	4	4	1800000	0.00445			sp|Q9R1Q9|VAS1_MOUSE	Atp6ap1	4	4	1100000	0.00455			sp|O08749|DLDH_MOUSE	Dld	6	11	8300000	0.0158			sp|P62874|GBB1_MOUSE	Gnb1	6	46	580000000	1.34			sp|E9PUL5|PRRT2_MOUSE	Prrt2	5	21	6600000	0.0212		sp|Q9CYH2|F213A_MOUSE	Fam213a
	sp|Q8VHW2|CCG8_MOUSE	Cacng8	3	4	190000	0.00111			sp|Q80Z38|SHAN2_MOUSE	Shank2	4	4	520000	0.0013			sp|Q9JMA1|UBP14_MOUSE	Usp14	4	4	270000	0.00107			sp|P61089|UBE2N_MOUSE	Ube2n	6	10	19000000	0.0364			sp|P62983|RS27A_MOUSE	Rps27a	6	28	190000000	0.44			sp|O54901|OX2G_MOUSE	Cd200	5	15	57000000	0.18		sp|P47757|CAPZB_MOUSE	Capzb
	sp|Q8C996|TM163_MOUSE	Tmem163	3	4	140000	0.000815			sp|Q9CQ45|NENF_MOUSE	Nenf	4	4	560000	0.0014			sp|O35405|PLD3_MOUSE	Pld3	4	4	710000	0.00283			sp|P62748|HPCL1_MOUSE	Hpcal1	6	10	18000000	0.0334			sp|P35802|GPM6A_MOUSE	Gpm6a	6	27	190000000	0.44			sp|Q80Z24|NEGR1_MOUSE	Negr1	5	15	34000000	0.11		sp|Q8BTG7|NDRG4_MOUSE	Ndrg4
	sp|Q9DAU1|CNPY3_MOUSE	Cnpy3	3	4	400000	0.00238			sp|Q8BWF0|SSDH_MOUSE	Aldh5a1	4	4	2800000	0.00698			sp|Q61166|MARE1_MOUSE	Mapre1	4	4	460000	0.00181			sp|P62835|RAP1A_MOUSE	Rap1a	6	10	14000000	0.026			sp|P31648|SC6A1_MOUSE	Slc6a1	6	17	60000000	0.14			tr|Q6DFY2|Q6DFY2_MOUSE	Opcml	5	15	43000000	0.14		sp|Q8CBH5|MFSD6_MOUSE	Mfsd6
	sp|Q8R332|NUP58_MOUSE	Nup58	3	4	460000	0.00275			sp|P14206|RSSA_MOUSE	Rpsa	4	4	1200000	0.00295			sp|O35633|VIAAT_MOUSE	Slc32a1	4	4	1200000	0.00486			sp|P08752|GNAI2_MOUSE	Gnai2	6	9	15000000	0.0285			sp|P97797|SHPS1_MOUSE	Sirpa	6	17	49000000	0.11			sp|P31650|S6A11_MOUSE	Slc6a11	5	14	11000000	0.0353		sp|Q6PCX7|RGMA_MOUSE	Rgma
	sp|P12023|A4_MOUSE	App	3	4	170000	0.000991			sp|Q9CZU6|CISY_MOUSE	Cs	4	4	940000	0.00237			sp|P0C192|LRC4B_MOUSE	Lrrc4b	4	4	520000	0.00204			sp|Q9CR68|UCRI_MOUSE	Uqcrfs1	6	9	13000000	0.0243			sp|P18572|BASI_MOUSE	Bsg	6	15	39000000	0.0903			sp|O70166|STMN3_MOUSE	Stmn3	5	13	5700000	0.0182		sp|P12023|A4_MOUSE	App
	sp|Q05186|RCN1_MOUSE	Rcn1	3	4	260000	0.00153			sp|Q8VEM8|MPCP_MOUSE	Slc25a3	4	4	1300000	0.00333			sp|O70591|PFD2_MOUSE	Pfdn2	4	4	830000	0.0033			sp|P35951|LDLR_MOUSE	Ldlr	6	9	1900000	0.00357			sp|P21279|GNAQ_MOUSE	Gnaq	6	14	29000000	0.0667			sp|P99024|TBB5_MOUSE	Tubb5	5	12	28000000	0.0883		sp|Q8VIM9|IRGQ_MOUSE	Irgq
	sp|Q9WVQ1|MAGI2_MOUSE	Magi2	3	4	130000	0.000741			sp|Q811D0|DLG1_MOUSE	Dlg1	4	4	1300000	0.00328			sp|P47757|CAPZB_MOUSE	Capzb	4	4	680000	0.00269			sp|Q7TN29|SMAP2_MOUSE	Smap2	6	9	8200000	0.0157			sp|Q80Z24|NEGR1_MOUSE	Negr1	6	14	65000000	0.15			sp|Q69ZS6|SV2C_MOUSE	Sv2c	5	12	28000000	0.0895		sp|Q9QYI3|DNJC7_MOUSE	Dnajc7
	sp|P09671|SODM_MOUSE	Sod2	3	4	2300000	0.0136			sp|Q9D6J6|NDUV2_MOUSE	Ndufv2	4	4	630000	0.00158			sp|Q91VD9|NDUS1_MOUSE	Ndufs1	4	4	920000	0.00365			sp|P52875|TM165_MOUSE	Tmem165	6	8	5300000	0.01			sp|O54901|OX2G_MOUSE	Cd200	6	13	72000000	0.17			sp|Q8R191|SNG3_MOUSE	Syngr3	5	12	75000000	0.24		sp|Q61036|PAK3_MOUSE	Pak3
	sp|Q8QZT1|THIL_MOUSE	Acat1	3	4	360000	0.00214			sp|P10126|EF1A1_MOUSE	Eef1a1	4	4	870000	0.00218			sp|Q9D1Q6|ERP44_MOUSE	Erp44	4	4	890000	0.00354			sp|Q9CQD1|RAB5A_MOUSE	Rab5a	6	8	7600000	0.0145			sp|P15920|VPP2_MOUSE	Atp6v0a2	6	13	45000000	0.1			sp|Q99N28|CADM3_MOUSE	Cadm3	5	11	33000000	0.1		tr|Q3UTP0|Q3UTP0_MOUSE	Pcdh17
	sp|P62627|DLRB1_MOUSE	Dynlrb1	3	4	880000	0.0052			sp|Q6PGH2|JUPI2_MOUSE	Jpt2	4	4	1100000	0.00266			sp|Q68FL4|SAHH3_MOUSE	Ahcyl2	4	4	400000	0.00159			sp|P99027|RLA2_MOUSE	Rplp2	6	8	18000000	0.0351			sp|P0DP27|CALM2_MOUSE	Calm2	6	12	58000000	0.13			sp|P68254|1433T_MOUSE	Ywhaq	5	10	7400000	0.0235		sp|Q8BHK2|SCN3B_MOUSE	Scn3b
	sp|Q8VIM9|IRGQ_MOUSE	Irgq	3	4	180000	0.00106			sp|Q5RKR3|ISLR2_MOUSE	Islr2	4	4	490000	0.00123			sp|Q9JL56|GDE1_MOUSE	Gde1	4	4	1100000	0.00441			sp|Q9DAM7|TM263_MOUSE	Tmem263	6	8	7800000	0.0148			sp|Q8VEH3|ARL8A_MOUSE	Arl8a	6	11	13000000	0.0301			sp|P84075|HPCA_MOUSE	Hpca	5	10	33000000	0.11		sp|Q61831|MK10_MOUSE	Mapk10
	sp|Q6P1D5|SE6L1_MOUSE	Sez6l	3	4	380000	0.00224			sp|O35405|PLD3_MOUSE	Pld3	4	4	1300000	0.00327			sp|Q9D5V6|SYAP1_MOUSE	Syap1	4	4	350000	0.0014			sp|Q9QYA2|TOM40_MOUSE	Tomm40	6	8	8800000	0.0167			sp|Q60930|VDAC2_MOUSE	Vdac2	6	11	45000000	0.1			sp|O35633|VIAAT_MOUSE	Slc32a1	5	10	7900000	0.0252		sp|Q00623|APOA1_MOUSE	Apoa1
	sp|Q8R366|IGSF8_MOUSE	Igsf8	3	4	280000	0.00167			sp|Q8BIW1|PRUN1_MOUSE	Prune1	4	4	490000	0.00122			sp|O88507|CNTFR_MOUSE	Cntfr	4	4	780000	0.00309			sp|P0DP27|CALM2_MOUSE	Calm2	6	8	39000000	0.0751			sp|Q91VR2|ATPG_MOUSE	Atp5c1	6	11	21000000	0.0487			sp|P08752|GNAI2_MOUSE	Gnai2	5	9	8200000	0.0263		sp|O35887|CALU_MOUSE	Calu
	sp|Q8CAY6|THIC_MOUSE	Acat2	3	4	830000	0.0049			sp|Q91VU0|FAM3C_MOUSE	Fam3c	4	4	420000	0.00105			sp|Q9QYE6|GOGA5_MOUSE	Golga5	4	4	230000	0.000927			sp|Q3UYC0|PPM1H_MOUSE	Ppm1h	6	8	3300000	0.0063			sp|P48318|DCE1_MOUSE	Gad1	6	10	3000000	0.00703			sp|Q9D164|FXYD6_MOUSE	Fxyd6	5	9	10000000	0.0333		sp|Q66JS6|EI3JB_MOUSE	Eif3j2
	sp|Q8C1B7|SEP11_MOUSE	2017-09-11	3	4	300000	0.00178			sp|Q9JLB0|MPP6_MOUSE	Mpp6	4	4	650000	0.00164			sp|Q9DBS1|TMM43_MOUSE	Tmem43	4	4	870000	0.00345			sp|Q8R3V5|SHLB2_MOUSE	Sh3glb2	6	8	5600000	0.0107			sp|Q8BIF0|C99L2_MOUSE	Cd99l2	6	10	8100000	0.0187			sp|O70480|VAMP4_MOUSE	Vamp4	5	9	4000000	0.0128		tr|Q3TU36|Q3TU36_MOUSE	Rap1gds1
	sp|Q9QXV0|PCSK1_MOUSE	Pcsk1n	3	4	300000	0.00177			sp|Q9JLB9|NECT3_MOUSE	Nectin3	4	4	2100000	0.00518			sp|P06745|G6PI_MOUSE	Gpi	4	4	820000	0.00325			sp|P10649|GSTM1_MOUSE	Gstm1	6	8	2000000	0.00383			sp|P99029|PRDX5_MOUSE	Prdx5	6	10	12000000	0.0274			sp|Q8BIF0|C99L2_MOUSE	Cd99l2	5	8	5600000	0.0178		sp|Q8R105|VP37C_MOUSE	Vps37c
	tr|B2RXT3|B2RXT3_MOUSE	Ogdhl	3	4	190000	0.00114			sp|P41216|ACSL1_MOUSE	Acsl1	4	4	450000	0.00114			sp|Q64133|AOFA_MOUSE	Maoa	4	4	370000	0.00147			sp|P57759|ERP29_MOUSE	Erp29	6	8	5100000	0.00975			sp|Q9CQC9|SAR1B_MOUSE	Sar1b	6	10	3600000	0.00826			sp|Q6P1D5|SE6L1_MOUSE	Sez6l	5	8	1900000	0.00599		sp|P30275|KCRU_MOUSE	Ckmt1
	sp|Q7TQ95|LNP_MOUSE	Lnp	3	4	280000	0.00167			sp|Q9WUL7|ARL3_MOUSE	Arl3	4	4	1200000	0.00303			sp|Q811D0|DLG1_MOUSE	Dlg1	4	4	1400000	0.00571			sp|P12023|A4_MOUSE	App	6	7	2500000	0.00468			sp|O35633|VIAAT_MOUSE	Slc32a1	6	10	17000000	0.0395			sp|Q91XL9|OSBL1_MOUSE	Osbpl1a	5	8	2300000	0.0074		sp|Q8BVQ5|PPME1_MOUSE	Ppme1
	sp|Q91VK1|BZW2_MOUSE	Bzw2	3	4	240000	0.00141			sp|P09411|PGK1_MOUSE	Pgk1	4	4	730000	0.00184			sp|Q8C080|SNX16_MOUSE	Snx16	4	4	390000	0.00155			sp|Q8R317|UBQL1_MOUSE	Ubqln1	6	7	7800000	0.0149			sp|Q8R1V4|TMED4_MOUSE	Tmed4	6	10	8800000	0.0202			sp|Q8VHW2|CCG8_MOUSE	Cacng8	5	7	2800000	0.00888		sp|Q9D0F3|LMAN1_MOUSE	Lman1
	sp|Q80TL4|PHF24_MOUSE	Phf24	3	4	630000	0.00371			sp|Q9D0F3|LMAN1_MOUSE	Lman1	4	4	1200000	0.00313			sp|Q9QY76|VAPB_MOUSE	Vapb	4	4	940000	0.00372			sp|Q01853|TERA_MOUSE	Vcp	6	7	1300000	0.00248			sp|P58021|TM9S2_MOUSE	Tm9sf2	6	9	8600000	0.0199			sp|Q9R257|HEBP1_MOUSE	Hebp1	5	7	10000000	0.032		sp|Q9QZ06|TOLIP_MOUSE	Tollip
	sp|O70492|SNX3_MOUSE	Snx3	3	4	2700000	0.0159			sp|Q8VE62|PAIP1_MOUSE	Paip1	4	4	1300000	0.00316			sp|O88712|CTBP1_MOUSE	Ctbp1	4	4	3900000	0.0153			sp|Q63810|CANB1_MOUSE	Ppp3r1	6	7	7000000	0.0133			sp|Q63850|NUP62_MOUSE	Nup62	6	9	9200000	0.0212			tr|Q99M55|Q99M55_MOUSE	Atp6v0a1	5	7	19000000	0.0603		sp|P70404|IDHG1_MOUSE	Idh3g
	sp|Q9R0P5|DEST_MOUSE	Dstn	3	4	230000	0.00139			sp|Q9WTR1|TRPV2_MOUSE	Trpv2	4	4	1400000	0.00342			sp|Q9D172|ES1_MOUSE	D10Jhu81e	4	4	1700000	0.00659			sp|Q5SRX1|TM1L2_MOUSE	Tom1l2	6	7	2100000	0.00407			sp|Q9CR68|UCRI_MOUSE	Uqcrfs1	6	9	12000000	0.0266			sp|Q9R013|CATF_MOUSE	Ctsf	5	7	5100000	0.0162		sp|P05064|ALDOA_MOUSE	Aldoa
	sp|O08795|GLU2B_MOUSE	Prkcsh	3	4	1300000	0.0074			sp|P30275|KCRU_MOUSE	Ckmt1	4	4	1300000	0.00329			sp|Q6VNS1|NTRK3_MOUSE	Ntrk3	4	4	440000	0.00173			sp|Q91XM9|DLG2_MOUSE	Dlg2	6	7	2500000	0.00474			sp|P97450|ATP5J_MOUSE	Atp5j	6	9	16000000	0.0369			sp|Q71FD5|ZNRF2_MOUSE	Znrf2	5	7	4200000	0.0133		sp|Q9WU60|ATRN_MOUSE	Atrn
	sp|Q9Z0X1|AIFM1_MOUSE	Aifm1	3	4	210000	0.00124			sp|Q60629|EPHA5_MOUSE	Epha5	4	4	1100000	0.00269			sp|Q08331|CALB2_MOUSE	Calb2	4	4	970000	0.00386			sp|Q7M6Y3|PICAL_MOUSE	Picalm	6	7	6500000	0.0123			sp|Q9D1K2|VATF_MOUSE	Atp6v1f	6	9	13000000	0.0303			sp|Q91VU0|FAM3C_MOUSE	Fam3c	5	7	1700000	0.00551		sp|Q8BWF0|SSDH_MOUSE	Aldh5a1
	sp|Q61166|MARE1_MOUSE	Mapre1	3	4	320000	0.00191			sp|P60755|MDGA2_MOUSE	Mdga2	4	4	410000	0.00102			sp|Q6PDM2|SRSF1_MOUSE	Srsf1	4	4	1400000	0.00535			sp|Q9JK48|SHLB1_MOUSE	Sh3glb1	6	7	6300000	0.012			sp|P12787|COX5A_MOUSE	Cox5a	6	9	15000000	0.0349			sp|Q91V12|BACH_MOUSE	Acot7	5	7	2700000	0.00856		sp|D3YVF0|AKAP5_MOUSE	Akap5
	sp|O35449|PRRT1_MOUSE	Prrt1	3	4	1100000	0.00658			sp|Q8CGK3|LONM_MOUSE	Lonp1	4	4	460000	0.00117			sp|P35585|AP1M1_MOUSE	Ap1m1	4	4	370000	0.00146			sp|Q9WU78|PDC6I_MOUSE	Pdcd6ip	6	7	3000000	0.00562			sp|Q6PDL0|DC1L2_MOUSE	Dync1li2	6	9	1900000	0.00442			sp|P12787|COX5A_MOUSE	Cox5a	5	7	13000000	0.0405		sp|Q91WC3|ACSL6_MOUSE	Acsl6
	sp|Q61081|CDC37_MOUSE	Cdc37	3	4	300000	0.00178			sp|Q8R180|ERO1A_MOUSE	Ero1a	4	4	620000	0.00156			sp|P56395|CYB5_MOUSE	Cyb5a	4	4	1800000	0.00701			sp|P62962|PROF1_MOUSE	Pfn1	6	7	5900000	0.0113			sp|Q03137|EPHA4_MOUSE	Epha4	6	8	2700000	0.00633			sp|P54728|RD23B_MOUSE	Rad23b	5	7	3700000	0.0117		sp|Q7TSJ2|MAP6_MOUSE	Map6
	sp|Q9WUM5|SUCA_MOUSE	Suclg1	3	4	180000	0.00109			sp|Q3UHD6|SNX27_MOUSE	Snx27	4	4	670000	0.00169			sp|Q61739|ITA6_MOUSE	Itga6	4	4	200000	0.000785			sp|Q8VCS3|XYLK_MOUSE	Fam20b	6	7	8000000	0.0151			sp|Q9CPQ3|TOM22_MOUSE	Tomm22	6	8	4500000	0.0104			sp|P70206|PLXA1_MOUSE	Plxna1	5	7	3500000	0.0112		sp|Q9CX00|IST1_MOUSE	Ist1
	sp|Q9WV80|SNX1_MOUSE	Snx1	3	4	2000000	0.0116			sp|P61161|ARP2_MOUSE	Actr2	4	4	2000000	0.00499			sp|Q9CR00|PSMD9_MOUSE	Psmd9	4	4	380000	0.0015			tr|Q91VA7|Q91VA7_MOUSE	Idh3b	6	7	2100000	0.0039			tr|Q9Z1A1|Q9Z1A1_MOUSE	Tfg	6	8	5600000	0.0128			sp|Q64433|CH10_MOUSE	Hspe1	5	7	20000000	0.0627		sp|Q9CZD3|GARS_MOUSE	Gars
	sp|O70493|SNX12_MOUSE	Snx12	3	4	870000	0.00515			sp|O88844|IDHC_MOUSE	Idh1	4	4	540000	0.00137			sp|O08709|PRDX6_MOUSE	Prdx6	4	4	610000	0.00241			sp|Q8BK64|AHSA1_MOUSE	Ahsa1	6	7	6200000	0.0118			sp|Q68FL4|SAHH3_MOUSE	Ahcyl2	6	8	1800000	0.00415			sp|O35114|SCRB2_MOUSE	Scarb2	5	7	1900000	0.00612		sp|Q80VP1|EPN1_MOUSE	Epn1
	sp|P29341|PABP1_MOUSE	Pabpc1	3	4	180000	0.00106			sp|Q68FL4|SAHH3_MOUSE	Ahcyl2	4	4	730000	0.00184			sp|Q99LI8|HGS_MOUSE	Hgs	4	4	770000	0.00305			sp|Q80TR1|AGRL1_MOUSE	Adgrl1	6	7	1400000	0.00274			sp|Q9DC07|LNEBL_MOUSE	Nebl	6	8	2200000	0.00517			sp|Q8R1V4|TMED4_MOUSE	Tmed4	5	7	4900000	0.0157		sp|Q6WVG3|KCD12_MOUSE	Kctd12
	sp|Q9R1J0|NSDHL_MOUSE	Nsdhl	3	4	1700000	0.00981			sp|Q91W90|TXND5_MOUSE	Txndc5	4	4	830000	0.00209			sp|Q8K0D5|EFGM_MOUSE	Gfm1	4	4	320000	0.00126			sp|P35486|ODPA_MOUSE	Pdha1	6	7	7400000	0.0141			sp|P18052|PTPRA_MOUSE	Ptpra	6	8	2500000	0.00572			sp|Q80UU9|PGRC2_MOUSE	Pgrmc2	5	6	2300000	0.00729		sp|Q9DB73|NB5R1_MOUSE	Cyb5r1
	sp|P14152|MDHC_MOUSE	Mdh1	3	4	530000	0.00311			sp|Q9CYZ2|TPD54_MOUSE	Tpd52l2	4	4	3700000	0.0094			sp|Q9DCW4|ETFB_MOUSE	Etfb	4	4	640000	0.00254			sp|Q9DC16|ERGI1_MOUSE	Ergic1	6	7	7000000	0.0134			sp|Q9R0P9|UCHL1_MOUSE	Uchl1	6	8	3700000	0.00845			sp|Q7M6Y3|PICAL_MOUSE	Picalm	5	6	2200000	0.00711		sp|Q9WTR1|TRPV2_MOUSE	Trpv2
	sp|Q3UMR5|MCU_MOUSE	Mcu	3	4	310000	0.00185			sp|Q9CQA3|SDHB_MOUSE	Sdhb	4	4	2600000	0.00644			sp|Q9WVG6|CARM1_MOUSE	Carm1	4	4	550000	0.00218			sp|Q9DBS1|TMM43_MOUSE	Tmem43	6	7	4200000	0.00801			sp|Q8BFT9|SVOP_MOUSE	Svop	6	8	3600000	0.00824			sp|P09411|PGK1_MOUSE	Pgk1	5	6	1200000	0.0037		sp|O35607|BMPR2_MOUSE	Bmpr2
	sp|Q9D1K2|VATF_MOUSE	Atp6v1f	3	4	840000	0.00495			sp|O35633|VIAAT_MOUSE	Slc32a1	4	4	1800000	0.0044			sp|Q8K4R4|PITC1_MOUSE	Pitpnc1	4	4	310000	0.00122			sp|O89053|COR1A_MOUSE	Coro1a	6	7	1600000	0.00302			sp|Q91XL9|OSBL1_MOUSE	Osbpl1a	6	8	2100000	0.0049			sp|O88342|WDR1_MOUSE	Wdr1	5	6	1500000	0.00483		sp|Q9D5V6|SYAP1_MOUSE	Syap1
	sp|Q9DC16|ERGI1_MOUSE	Ergic1	3	4	760000	0.00449			sp|P45878|FKBP2_MOUSE	Fkbp2	4	4	2600000	0.00652			sp|P24638|PPAL_MOUSE	Acp2	4	4	420000	0.00167			sp|P54728|RD23B_MOUSE	Rad23b	6	7	5200000	0.00987			sp|Q99NB8|UBQL4_MOUSE	Ubqln4	6	8	3600000	0.00827			sp|P10649|GSTM1_MOUSE	Gstm1	5	6	2100000	0.00657		sp|Q9JHU2|PALMD_MOUSE	Palmd
	sp|Q8BJU0|SGTA_MOUSE	Sgta	3	4	520000	0.00308			sp|P47757|CAPZB_MOUSE	Capzb	4	4	920000	0.0023			tr|A2MY50|A2MY50_MOUSE		3	30	500000000	1.99			sp|Q6VNS1|NTRK3_MOUSE	Ntrk3	6	7	5200000	0.00989			sp|Q9DC16|ERGI1_MOUSE	Ergic1	6	8	7100000	0.0164			sp|Q9D0F3|LMAN1_MOUSE	Lman1	5	6	2600000	0.00837		sp|Q8VD37|SGIP1_MOUSE	Sgip1
	sp|P62075|TIM13_MOUSE	Timm13	3	4	960000	0.00571			sp|Q9R0P5|DEST_MOUSE	Dstn	4	4	1000000	0.00253			sp|Q91ZZ3|SYUB_MOUSE	Sncb	3	25	470000000	1.85			sp|Q03137|EPHA4_MOUSE	Epha4	6	6	2100000	0.00401			tr|Q0VGU4|Q0VGU4_MOUSE	Vgf	6	7	1800000	0.00404			sp|P51880|FABP7_MOUSE	Fabp7	5	6	3500000	0.011		sp|P52800|EFNB2_MOUSE	Efnb2
	sp|O35153|BET1L_MOUSE	Bet1l	3	3	140000	0.00083			sp|P29341|PABP1_MOUSE	Pabpc1	4	4	570000	0.00143			sp|Q9D6P8|CALL3_MOUSE	Calml3	3	14	9100000	0.0363			sp|Q924N4|S12A6_MOUSE	Slc12a6	6	6	1400000	0.00272			sp|P52875|TM165_MOUSE	Tmem165	6	7	4600000	0.0106			sp|P47867|SCG3_MOUSE	Scg3	5	6	1300000	0.00424		sp|Q5SQY2|BOD1_MOUSE	Bod1
	sp|Q9WTT4|VATG2_MOUSE	Atp6v1g2	3	3	200000	0.00118			sp|O35114|SCRB2_MOUSE	Scarb2	4	4	1300000	0.00335			sp|P60766|CDC42_MOUSE	Cdc42	3	13	24000000	0.0935			sp|Q60629|EPHA5_MOUSE	Epha5	6	6	2200000	0.00424			sp|P12023|A4_MOUSE	App	6	7	2100000	0.00476			sp|P63005|LIS1_MOUSE	Pafah1b1	5	6	1600000	0.00521		sp|P41216|ACSL1_MOUSE	Acsl1
	sp|P51906|EAA3_MOUSE	Slc1a1	3	3	280000	0.00163			sp|Q64133|AOFA_MOUSE	Maoa	4	4	580000	0.00145			sp|E9PUL5|PRRT2_MOUSE	Prrt2	3	12	2200000	0.00865			sp|P48318|DCE1_MOUSE	Gad1	6	6	1400000	0.00274			sp|Q6P1D5|SE6L1_MOUSE	Sez6l	6	7	33000000	0.0761			sp|Q9CZ42|NNRD_MOUSE	Naxd	5	6	1100000	0.00346		sp|Q9CWK8|SNX2_MOUSE	Snx2
	sp|P59017|B2L13_MOUSE	Bcl2l13	3	3	260000	0.00156			sp|Q07113|MPRI_MOUSE	Igf2r	4	4	210000	0.000518			sp|P48455|PP2BC_MOUSE	Ppp3cc	3	12	13000000	0.0524			sp|P57780|ACTN4_MOUSE	Actn4	6	6	2200000	0.0042			sp|Q9JK48|SHLB1_MOUSE	Sh3glb1	6	7	6800000	0.0156			sp|P98156|VLDLR_MOUSE	Vldlr	5	6	720000	0.00231		sp|P63080|GBRB3_MOUSE	Gabrb3
	sp|P08414|KCC4_MOUSE	Camk4	3	3	150000	0.000909			sp|Q9JL56|GDE1_MOUSE	Gde1	4	4	2000000	0.00492			sp|P24668|MPRD_MOUSE	M6pr	3	10	1600000	0.00654			sp|Q99LC5|ETFA_MOUSE	Etfa	6	6	1800000	0.00351			sp|Q9ERT9|PPR1A_MOUSE	Ppp1r1a	6	7	3200000	0.00732			sp|P15209|NTRK2_MOUSE	Ntrk2	5	6	2100000	0.00659		sp|O88587|COMT_MOUSE	Comt
	sp|P19157|GSTP1_MOUSE	Gstp1	3	3	170000	0.000983			sp|Q8R0H9|GGA1_MOUSE	Gga1	4	4	490000	0.00124			sp|Q91VZ6|SMAP1_MOUSE	Smap1	3	10	2400000	0.0096			sp|P24270|CATA_MOUSE	Cat	6	6	1600000	0.00304			sp|O88342|WDR1_MOUSE	Wdr1	6	7	1700000	0.0039			sp|P58281|OPA1_MOUSE	Opa1	5	6	1100000	0.00345		sp|Q8BIJ6|SYIM_MOUSE	Iars2
	sp|Q01405|SC23A_MOUSE	Sec23a	3	3	120000	0.000688			sp|Q63912|OMGP_MOUSE	Omg	4	4	1600000	0.00395			sp|P63024|VAMP3_MOUSE	Vamp3	3	9	71000000	0.28			sp|P0DI97|NRX1B_MOUSE	Nrxn1	6	6	2900000	0.00545			sp|P61211|ARL1_MOUSE	Arl1	6	7	3000000	0.00693			sp|Q8BWF0|SSDH_MOUSE	Aldh5a1	5	6	1100000	0.00353		sp|Q62465|VAT1_MOUSE	Vat1
	sp|A2ALU4|SHRM2_MOUSE	Shroom2	3	3	120000	0.000714			sp|P58281|OPA1_MOUSE	Opa1	4	4	400000	0.000998			sp|P14231|AT1B2_MOUSE	Atp1b2	3	9	5200000	0.0205			sp|Q01405|SC23A_MOUSE	Sec23a	6	6	1100000	0.002			tr|Q80U83|Q80U83_MOUSE	Sec24c	6	7	1200000	0.00275			sp|Q921J2|RHEB_MOUSE	Rheb	5	6	6500000	0.0207		sp|Q61809|LRRN1_MOUSE	Lrrn1
	sp|P58021|TM9S2_MOUSE	Tm9sf2	3	3	180000	0.00105			sp|P35585|AP1M1_MOUSE	Ap1m1	4	4	640000	0.00162			tr|Q6P1J1|Q6P1J1_MOUSE	Crmp1	3	8	16000000	0.0654			sp|P23506|PIMT_MOUSE	Pcmt1	6	6	2500000	0.0047			sp|Q03517|SCG2_MOUSE	Scg2	6	7	1500000	0.00337			tr|Q9Z1A1|Q9Z1A1_MOUSE	Tfg	5	6	3800000	0.0121		sp|Q9EPR4|S23A2_MOUSE	Slc23a2
	sp|Q99LC5|ETFA_MOUSE	Etfa	3	3	300000	0.00179			sp|Q9CR16|PPID_MOUSE	Ppid	4	4	7700000	0.0195			tr|Q6DFY2|Q6DFY2_MOUSE	Opcml	3	8	17000000	0.069			sp|Q9QUR8|SEM7A_MOUSE	Sema7a	6	6	4000000	0.00767			tr|Q3UTP0|Q3UTP0_MOUSE	Pcdh17	6	7	1300000	0.00295			sp|Q9CQ22|LTOR1_MOUSE	Lamtor1	5	6	2300000	0.00736		sp|Q8K4R4|PITC1_MOUSE	Pitpnc1
	sp|Q9DB73|NB5R1_MOUSE	Cyb5r1	3	3	190000	0.00112			sp|Q8K0D5|EFGM_MOUSE	Gfm1	4	4	400000	0.00101			sp|P70296|PEBP1_MOUSE	Pebp1	3	8	7900000	0.0313			sp|P32507|NECT2_MOUSE	Nectin2	6	6	2500000	0.00481			sp|P10649|GSTM1_MOUSE	Gstm1	6	7	2800000	0.00652			sp|P35486|ODPA_MOUSE	Pdha1	5	6	11000000	0.0357		sp|Q3UHN9|NDST1_MOUSE	Ndst1
	sp|Q9Z1Z2|STRAP_MOUSE	Strap	3	3	160000	0.000955			sp|Q9CZD3|GARS_MOUSE	Gars	4	4	430000	0.00108			sp|Q8R5J9|PRAF3_MOUSE	Arl6ip5	3	6	2100000	0.00817			sp|O35405|PLD3_MOUSE	Pld3	6	6	4100000	0.00776			sp|Q6PHS9|CA2D2_MOUSE	Cacna2d2	6	7	4400000	0.0102			tr|Q3TU36|Q3TU36_MOUSE	Rap1gds1	5	6	720000	0.0023		sp|Q9JHU4|DYHC1_MOUSE	Dync1h1
	sp|Q8BL66|EEA1_MOUSE	Eea1	3	3	110000	0.000651			sp|P22892|AP1G1_MOUSE	Ap1g1	4	4	450000	0.00113			sp|Q9D2M8|UB2V2_MOUSE	Ube2v2	3	6	1000000	0.00399			sp|P54754|EPHB3_MOUSE	Ephb3	6	6	1300000	0.00242			sp|Q61171|PRDX2_MOUSE	Prdx2	6	7	4900000	0.0114			sp|Q8CBH5|MFSD6_MOUSE	Mfsd6	5	6	1700000	0.0055		sp|Q8BUV3|GEPH_MOUSE	Gphn
	sp|P47867|SCG3_MOUSE	Scg3	3	3	150000	0.000916			sp|P24638|PPAL_MOUSE	Acp2	4	4	640000	0.00162			sp|Q9Z1W8|AT12A_MOUSE	Atp12a	3	6	27000000	0.11			sp|P60755|MDGA2_MOUSE	Mdga2	6	6	1200000	0.00229			sp|P22892|AP1G1_MOUSE	Ap1g1	6	7	2200000	0.00512			sp|Q02248|CTNB1_MOUSE	Ctnnb1	5	6	630000	0.00201		sp|P62874|GBB1_MOUSE	Gnb1
	sp|P70423|CTR3_MOUSE	Slc7a3	3	3	1200000	0.0073			sp|P35700|PRDX1_MOUSE	Prdx1	4	4	2200000	0.00562			tr|Q6PGJ3|Q6PGJ3_MOUSE	L1cam	3	5	5200000	0.0207			sp|P10630|IF4A2_MOUSE	Eif4a2	6	6	1300000	0.00245			sp|Q9JL56|GDE1_MOUSE	Gde1	6	7	4300000	0.00984			sp|O88587|COMT_MOUSE	Comt	5	6	510000	0.00162		sp|Q9Z127|LAT1_MOUSE	Slc7a5
	sp|Q9CRD0|OCAD1_MOUSE	Ociad1	3	3	180000	0.00107			tr|A2MY50|A2MY50_MOUSE		3	37	860000000	2.15			tr|Q5SUH6|Q5SUH6_MOUSE	Clint1	3	5	6400000	0.0253			sp|Q921H8|THIKA_MOUSE	Acaa1a	6	6	2300000	0.00447			sp|P54728|RD23B_MOUSE	Rad23b	6	7	3700000	0.00852			sp|Q99LP6|GRPE1_MOUSE	Grpel1	5	6	2200000	0.00703		sp|P62983|RS27A_MOUSE	Rps27a
	sp|P63330|PP2AA_MOUSE	Ppp2ca	3	3	260000	0.00153			sp|Q91ZZ3|SYUB_MOUSE	Sncb	3	28	540000000	1.36			tr|Q8C7C3|Q8C7C3_MOUSE	Tpm3	3	5	2200000	0.00859			sp|Q9CQ22|LTOR1_MOUSE	Lamtor1	6	6	2200000	0.00415			sp|Q3UHJ0|AAK1_MOUSE	Aak1	6	6	1100000	0.00246			sp|P17047|LAMP2_MOUSE	Lamp2	5	6	2700000	0.00867		sp|Q9JKD3|SCAM5_MOUSE	Scamp5
	sp|Q62421|SH3G3_MOUSE	Sh3gl3	3	3	120000	0.000703			sp|O70456|1433S_MOUSE	Sfn	3	11	81000000	0.2			sp|Q8R4C2|RUFY2_MOUSE	Rufy2	3	5	3300000	0.0131			sp|Q9QYI3|DNJC7_MOUSE	Dnajc7	6	6	1700000	0.00321			sp|P32507|NECT2_MOUSE	Nectin2	6	6	1900000	0.00437			sp|Q03137|EPHA4_MOUSE	Epha4	5	5	870000	0.00279		sp|P68254|1433T_MOUSE	Ywhaq
	sp|Q9Z2Y3|HOME1_MOUSE	Homer1	3	3	160000	0.000971			sp|O70166|STMN3_MOUSE	Stmn3	3	11	3000000	0.00766			sp|Q78YZ6|SCOC_MOUSE	Scoc	3	5	3100000	0.0125			sp|P80560|PTPR2_MOUSE	Ptprn2	6	6	1200000	0.00237			sp|Q99LC5|ETFA_MOUSE	Etfa	6	6	1600000	0.00379			sp|Q9DC07|LNEBL_MOUSE	Nebl	5	5	1700000	0.0054		tr|Q6DFY2|Q6DFY2_MOUSE	Opcml
	sp|Q9JLM8|DCLK1_MOUSE	Dclk1	3	3	410000	0.00243			sp|P48455|PP2BC_MOUSE	Ppp3cc	3	10	15000000	0.0369			sp|O70251|EF1B_MOUSE	Eef1b	3	5	1300000	0.00527			sp|P29758|OAT_MOUSE	Oat	6	6	2500000	0.00476			sp|P05132|KAPCA_MOUSE	Prkaca	6	6	1700000	0.00402			sp|P05132|KAPCA_MOUSE	Prkaca	5	5	2000000	0.00636		sp|Q9CZY3|UB2V1_MOUSE	Ube2v1
	sp|P47754|CAZA2_MOUSE	Capza2	3	3	300000	0.00176			tr|E9QB01|E9QB01_MOUSE	Ncam1	3	9	30000000	0.0759			sp|Q921J2|RHEB_MOUSE	Rheb	3	5	5600000	0.0223			sp|Q9Z0E0|NCDN_MOUSE	Ncdn	6	6	1400000	0.00275			sp|P15116|CADH2_MOUSE	Cdh2	6	6	4300000	0.00989			sp|O35887|CALU_MOUSE	Calu	5	5	980000	0.00313		sp|P36536|SAR1A_MOUSE	Sar1a
	sp|Q03958|PFD6_MOUSE	Pfdn6	3	3	540000	0.00318			sp|P97765|WBP2_MOUSE	Wbp2	3	9	5200000	0.0131			tr|E0CYM8|E0CYM8_MOUSE	Sirpa	3	5	7500000	0.0296			sp|Q8BGT1|FLRT3_MOUSE	Flrt3	6	6	2100000	0.00397			sp|P09411|PGK1_MOUSE	Pgk1	6	6	1500000	0.00345			sp|Q3UHJ0|AAK1_MOUSE	Aak1	5	5	950000	0.00304		sp|P70296|PEBP1_MOUSE	Pebp1
	sp|Q8BH24|TM9S4_MOUSE	Tm9sf4	3	3	290000	0.00169			tr|Q6P1J1|Q6P1J1_MOUSE	Crmp1	3	8	25000000	0.0627			sp|Q60605|MYL6_MOUSE	Myl6	3	5	260000	0.00103			sp|P99029|PRDX5_MOUSE	Prdx5	6	6	5800000	0.011			sp|Q99PT1|GDIR1_MOUSE	Arhgdia	6	6	2600000	0.00609			sp|Q07813|BAX_MOUSE	Bax	5	5	1000000	0.00334		sp|Q62048|PEA15_MOUSE	Pea15
	sp|P0DI97|NRX1B_MOUSE	Nrxn1	3	3	330000	0.00192			sp|P60766|CDC42_MOUSE	Cdc42	3	8	7300000	0.0182			sp|P56818|BACE1_MOUSE	Bace1	3	5	430000	0.00171			sp|Q76MZ3|2AAA_MOUSE	Ppp2r1a	6	6	1500000	0.00288			sp|Q9Z0E0|NCDN_MOUSE	Ncdn	6	6	1900000	0.00432			sp|Q8BL86|MBLC2_MOUSE	Mblac2	5	5	3000000	0.00946		sp|Q61171|PRDX2_MOUSE	Prdx2
	sp|Q9JM76|ARPC3_MOUSE	Arpc3	3	3	450000	0.00266			sp|Q9CQ92|FIS1_MOUSE	Fis1	3	8	10000000	0.0262			sp|P19536|COX5B_MOUSE	Cox5b	3	5	3500000	0.0137			sp|Q8BR92|PALM2_MOUSE	Palm2	6	6	4000000	0.0076			sp|Q6PGE7|SC6A7_MOUSE	Slc6a7	6	6	2200000	0.00503			sp|O88507|CNTFR_MOUSE	Cntfr	5	5	2300000	0.00734		sp|Q69ZS6|SV2C_MOUSE	Sv2c
	sp|P70175|DLG3_MOUSE	Dlg3	3	3	1400000	0.00806			sp|P63040|CPLX1_MOUSE	Cplx1	3	8	42000000	0.1			sp|Q9R1T4|SEPT6_MOUSE	2017-09-06	3	4	320000	0.00126			sp|Q9CWK8|SNX2_MOUSE	Snx2	6	6	1400000	0.00266			sp|Q9WV92|E41L3_MOUSE	Epb41l3	6	6	1000000	0.00231			sp|Q8R317|UBQL1_MOUSE	Ubqln1	5	5	4500000	0.0142		sp|P15920|VPP2_MOUSE	Atp6v0a2
	sp|Q8K0D5|EFGM_MOUSE	Gfm1	3	3	140000	0.000829			sp|P63044|VAMP2_MOUSE	Vamp2	3	7	37000000	0.0923			sp|Q62418|DBNL_MOUSE	Dbnl	3	4	1800000	0.00711			sp|B2RXS4|PLXB2_MOUSE	Plxnb2	6	6	1800000	0.00334			sp|Q61699|HS105_MOUSE	Hsph1	6	6	3400000	0.00792			sp|Q9CQD1|RAB5A_MOUSE	Rab5a	5	5	3500000	0.0112		sp|O35609|SCAM3_MOUSE	Scamp3
	sp|P61924|COPZ1_MOUSE	Copz1	3	3	130000	0.000742			sp|Q8R4C2|RUFY2_MOUSE	Rufy2	3	7	11000000	0.0284			sp|Q9D1K2|VATF_MOUSE	Atp6v1f	3	4	1000000	0.00407			sp|P52480|KPYM_MOUSE	Pkm	6	6	3000000	0.00567			sp|O70443|GNAZ_MOUSE	Gnaz	6	6	2500000	0.00583			sp|Q9Z0E0|NCDN_MOUSE	Ncdn	5	5	1100000	0.00348		sp|Q9CR95|NECP1_MOUSE	Necap1
	sp|Q11011|PSA_MOUSE	Npepps	3	3	1200000	0.00719			tr|Q8C7C3|Q8C7C3_MOUSE	Tpm3	3	7	5300000	0.0132			sp|Q9WTX5|SKP1_MOUSE	Skp1	3	4	900000	0.00359			sp|Q8JZN5|ACAD9_MOUSE	Acad9	6	6	3300000	0.00634			sp|Q9QYC0|ADDA_MOUSE	Add1	6	6	1900000	0.00428			sp|Q61627|GRID1_MOUSE	Grid1	5	5	990000	0.00315		sp|P61982|1433G_MOUSE	Ywhag
	sp|Q7TQI3|OTUB1_MOUSE	Otub1	3	3	180000	0.00109			IGH1M_MOUSE	Ighg1	3	7	8200000	0.0206			sp|P46414|CDN1B_MOUSE	Cdkn1b	3	4	480000	0.00188			sp|Q80WQ2|VAC14_MOUSE	Vac14	6	6	900000	0.00171			sp|P08226|APOE_MOUSE	Apoe	6	6	3600000	0.00823			sp|Q9D7N9|APMAP_MOUSE	Apmap	5	5	1600000	0.00513		sp|Q64433|CH10_MOUSE	Hspe1
	sp|P80560|PTPR2_MOUSE	Ptprn2	3	3	120000	0.000686			sp|Q8R1V4|TMED4_MOUSE	Tmed4	3	7	2600000	0.00659			sp|Q9Z2X1|HNRPF_MOUSE	Hnrnpf	3	4	620000	0.00247			sp|Q8CGK3|LONM_MOUSE	Lonp1	6	6	1500000	0.0028			sp|P54754|EPHB3_MOUSE	Ephb3	6	6	860000	0.00199			sp|Q99KJ8|DCTN2_MOUSE	Dctn2	5	5	860000	0.00276		sp|Q9CPQ3|TOM22_MOUSE	Tomm22
	sp|Q6V4S5|SDK2_MOUSE	Sdk2	3	3	130000	0.000756			sp|Q8VHW2|CCG8_MOUSE	Cacng8	3	6	1200000	0.00314			sp|Q99L43|CDS2_MOUSE	Cds2	3	4	3000000	0.0118			sp|Q60864|STIP1_MOUSE	Stip1	6	6	2800000	0.00523			sp|Q01853|TERA_MOUSE	Vcp	6	6	1400000	0.00319			sp|Q9QZ06|TOLIP_MOUSE	Tollip	5	5	1500000	0.00466		sp|Q71FD5|ZNRF2_MOUSE	Znrf2
	sp|Q9CQ45|NENF_MOUSE	Nenf	3	3	200000	0.00121			tr|Q5SUH6|Q5SUH6_MOUSE	Clint1	3	6	13000000	0.032			sp|Q8R1B5|CPLX3_MOUSE	Cplx3	3	4	600000	0.00239			sp|P35802|GPM6A_MOUSE	Gpm6a	5	35	260000000	0.49			sp|P23506|PIMT_MOUSE	Pcmt1	6	6	2200000	0.0051			sp|Q9QYC0|ADDA_MOUSE	Add1	5	5	1900000	0.00595		sp|Q8R4C2|RUFY2_MOUSE	Rufy2
	sp|P27601|GNA13_MOUSE	Gna13	3	3	140000	0.000811			sp|Q71FD5|ZNRF2_MOUSE	Znrf2	3	6	4000000	0.01			sp|Q8CI61|BAG4_MOUSE	Bag4	3	4	380000	0.00152			sp|P62983|RS27A_MOUSE	Rps27a	5	28	150000000	0.29			sp|Q9R0Q6|ARC1A_MOUSE	Arpc1a	6	6	2300000	0.00537			sp|P14152|MDHC_MOUSE	Mdh1	5	5	1800000	0.00586		sp|Q6P1D5|SE6L1_MOUSE	Sez6l
	sp|Q9QZX7|SRR_MOUSE	Srr	3	3	460000	0.00272			sp|Q78YZ6|SCOC_MOUSE	Scoc	3	6	5000000	0.0125			sp|Q9DBL1|ACDSB_MOUSE	Acadsb	3	4	260000	0.00102			sp|Q9Z127|LAT1_MOUSE	Slc7a5	5	20	34000000	0.0649			sp|Q9WTR1|TRPV2_MOUSE	Trpv2	6	6	3400000	0.00775			sp|O70443|GNAZ_MOUSE	Gnaz	5	5	1500000	0.00481		sp|Q62393|TPD52_MOUSE	Tpd52
	sp|Q3UDR8|YIPF3_MOUSE	Yipf3	3	3	230000	0.00138			sp|Q91VZ6|SMAP1_MOUSE	Smap1	3	6	14000000	0.0349			sp|Q8HW98|IGLO5_MOUSE	Iglon5	3	4	710000	0.00282			sp|P99024|TBB5_MOUSE	Tubb5	5	19	91000000	0.17			sp|Q9QYI5|DNJB2_MOUSE	Dnajb2	6	6	2500000	0.00568			sp|P23506|PIMT_MOUSE	Pcmt1	5	5	1700000	0.00535		sp|P15209|NTRK2_MOUSE	Ntrk2
	sp|P58389|PTPA_MOUSE	Ptpa	3	3	200000	0.00118			sp|Q9D6P8|CALL3_MOUSE	Calml3	3	6	4300000	0.0108			sp|Q6P5E6|GGA2_MOUSE	Gga2	3	4	190000	0.000737			sp|Q9WV27|AT1A4_MOUSE	Atp1a4	5	18	150000000	0.29			sp|Q9D8Y0|EFHD2_MOUSE	Efhd2	6	6	1500000	0.00349			sp|P47757|CAPZB_MOUSE	Capzb	5	5	1200000	0.0039		sp|Q8BL86|MBLC2_MOUSE	Mblac2
	tr|Q8CFX3|Q8CFX3_MOUSE	Pcdh1	3	3	300000	0.00174			sp|P19536|COX5B_MOUSE	Cox5b	3	6	4600000	0.0115			sp|P68181|KAPCB_MOUSE	Prkacb	3	4	680000	0.0027			sp|P28667|MRP_MOUSE	Marcksl1	5	14	25000000	0.0483			sp|Q9Z110|P5CS_MOUSE	Aldh18a1	6	6	1000000	0.00237			sp|Q9R1V6|ADA22_MOUSE	Adam22	5	5	2000000	0.00644		sp|Q8VDW0|DX39A_MOUSE	Ddx39a
	sp|Q9CZD3|GARS_MOUSE	Gars	3	3	270000	0.00159			tr|Q6PGJ3|Q6PGJ3_MOUSE	L1cam	3	5	11000000	0.0285			sp|Q8BXN9|TM87A_MOUSE	Tmem87a	3	4	340000	0.00135			sp|P31650|S6A11_MOUSE	Slc6a11	5	14	28000000	0.0537			sp|Q61809|LRRN1_MOUSE	Lrrn1	6	6	860000	0.00197			sp|O35454|CLCN6_MOUSE	Clcn6	5	5	880000	0.00282		sp|Q03137|EPHA4_MOUSE	Epha4
	sp|Q9D967|MGDP1_MOUSE	Mdp1	3	3	130000	0.000755			sp|O70251|EF1B_MOUSE	Eef1b	3	5	2900000	0.00717			sp|P70349|HINT1_MOUSE	Hint1	3	4	4200000	0.0168			sp|P15920|VPP2_MOUSE	Atp6v0a2	5	14	99000000	0.19			sp|Q3UHD6|SNX27_MOUSE	Snx27	6	6	2200000	0.00503			sp|P0C192|LRC4B_MOUSE	Lrrc4b	5	5	4400000	0.0141		sp|P52875|TM165_MOUSE	Tmem165
	sp|Q8VD37|SGIP1_MOUSE	Sgip1	3	3	190000	0.0011			sp|Q8R5J9|PRAF3_MOUSE	Arl6ip5	3	5	1900000	0.00487			sp|Q9QYC0|ADDA_MOUSE	Add1	3	4	450000	0.00177			sp|Q9CQV8|1433B_MOUSE	Ywhab	5	13	4100000	0.00789			sp|P80560|PTPR2_MOUSE	Ptprn2	6	6	1500000	0.00354			sp|Q9EPN1|NBEA_MOUSE	Nbea	5	5	25000000	0.0805		sp|O08547|SC22B_MOUSE	Sec22b
	sp|D3YVF0|AKAP5_MOUSE	Akap5	3	3	140000	0.000848			tr|Q8BXB3|Q8BXB3_MOUSE	Slc8a1	3	5	2100000	0.0052			sp|Q66JS6|EI3JB_MOUSE	Eif3j2	3	4	420000	0.00168			sp|P53994|RAB2A_MOUSE	Rab2a	5	13	56000000	0.11			sp|Q9JLB9|NECT3_MOUSE	Nectin3	6	6	4200000	0.00959			sp|Q5SRX1|TM1L2_MOUSE	Tom1l2	5	5	1100000	0.00344		sp|P32020|NLTP_MOUSE	Scp2
	sp|Q6WVG3|KCD12_MOUSE	Kctd12	3	3	150000	0.000907			tr|Q14BH8|Q14BH8_MOUSE	Cacna2d1	3	5	3900000	0.00984			sp|Q8K0C4|CP51A_MOUSE	Cyp51a1	3	4	240000	0.000969			sp|Q9CQX2|CYB5B_MOUSE	Cyb5b	5	12	24000000	0.0449			sp|P35585|AP1M1_MOUSE	Ap1m1	6	6	1600000	0.00368			sp|Q3UDR8|YIPF3_MOUSE	Yipf3	5	5	2100000	0.00657		sp|P60335|PCBP1_MOUSE	Pcbp1
	sp|Q9QY81|PO210_MOUSE	Nup210	3	3	130000	0.00075			sp|Q9QYG0|NDRG2_MOUSE	Ndrg2	3	5	580000	0.00146			sp|Q9CQR2|RS21_MOUSE	Rps21	3	4	220000	0.000884			sp|Q8VHW2|CCG8_MOUSE	Cacng8	5	11	8200000	0.0157			sp|Q8VEM8|MPCP_MOUSE	Slc25a3	6	6	4700000	0.0107			sp|Q8JZN5|ACAD9_MOUSE	Acad9	5	5	1100000	0.00344		sp|Q07813|BAX_MOUSE	Bax
	sp|P49615|CDK5_MOUSE	Cdk5	3	3	95000	0.00056			tr|E0CYM8|E0CYM8_MOUSE	Sirpa	3	5	11000000	0.0286			sp|Q8BMI3|GGA3_MOUSE	Gga3	3	4	450000	0.00177			sp|O88507|CNTFR_MOUSE	Cntfr	5	11	4200000	0.00804			sp|P32020|NLTP_MOUSE	Scp2	6	6	4400000	0.0102			sp|P20108|PRDX3_MOUSE	Prdx3	5	5	3100000	0.00982		sp|Q920E5|FPPS_MOUSE	Fdps
	sp|Q9CZ42|NNRD_MOUSE	Naxd	3	3	160000	0.000963			sp|Q6P5F9|XPO1_MOUSE	Xpo1	3	5	630000	0.00157			IGH1M_MOUSE	Ighg1	3	4	3100000	0.0124			sp|P14231|AT1B2_MOUSE	Atp1b2	5	11	22000000	0.0414			sp|Q8C080|SNX16_MOUSE	Snx16	6	6	1600000	0.00358			sp|O35405|PLD3_MOUSE	Pld3	5	5	2200000	0.00691		sp|Q64010|CRK_MOUSE	Crk
	sp|O35685|NUDC_MOUSE	Nudc	3	3	380000	0.00225			sp|Q9WUZ9|ENTP5_MOUSE	Entpd5	3	5	710000	0.00179			sp|Q99LP6|GRPE1_MOUSE	Grpel1	3	4	690000	0.00274			sp|Q9R013|CATF_MOUSE	Ctsf	5	9	11000000	0.021			sp|Q66JS6|EI3JB_MOUSE	Eif3j2	6	6	820000	0.00189			sp|P32507|NECT2_MOUSE	Nectin2	5	5	1100000	0.00342		sp|O88507|CNTFR_MOUSE	Cntfr
	sp|O88737|BSN_MOUSE	Bsn	3	3	290000	0.0017			sp|Q9R013|CATF_MOUSE	Ctsf	3	5	11000000	0.028			sp|P10637|TAU_MOUSE	Mapt	3	4	830000	0.00331			sp|Q791V5|MTCH2_MOUSE	Mtch2	5	9	3900000	0.00751			sp|Q9CVB6|ARPC2_MOUSE	Arpc2	6	6	1600000	0.00367			sp|Q9R1J0|NSDHL_MOUSE	Nsdhl	5	5	2700000	0.00865		sp|P10126|EF1A1_MOUSE	Eef1a1
	sp|P63082|VATL_MOUSE	Atp6v0c	3	3	270000	0.0016			sp|Q99KU0|VMP1_MOUSE	Vmp1	3	5	620000	0.00155			sp|P70206|PLXA1_MOUSE	Plxna1	3	4	940000	0.00374			sp|Q9ERT9|PPR1A_MOUSE	Ppp1r1a	5	9	5400000	0.0102			sp|P31650|S6A11_MOUSE	Slc6a11	5	21	24000000	0.0561			sp|Q8VCS3|XYLK_MOUSE	Fam20b	5	5	1200000	0.00373		sp|Q9CQI6|COTL1_MOUSE	Cotl1
	sp|Q91WC3|ACSL6_MOUSE	Acsl6	3	3	95000	0.000563			sp|Q9CPT4|MYDGF_MOUSE	Mydgf	3	5	3500000	0.00877			sp|P29533|VCAM1_MOUSE	Vcam1	3	4	250000	0.000981			sp|O08579|EMD_MOUSE	Emd	5	9	4000000	0.00769			sp|P99024|TBB5_MOUSE	Tubb5	5	20	65000000	0.15			sp|Q9CZU6|CISY_MOUSE	Cs	5	5	1200000	0.00391		sp|Q9WUM5|SUCA_MOUSE	Suclg1
	sp|Q7TME0|PLPR4_MOUSE	Plppr4	3	3	200000	0.00117			sp|Q05816|FABP5_MOUSE	Fabp5	3	5	12000000	0.0299			sp|Q9CYN9|RENR_MOUSE	Atp6ap2	3	4	1500000	0.00595			sp|P68254|1433T_MOUSE	Ywhaq	5	8	7500000	0.0143			IGKC_MOUSE		5	20	95000000	0.22			sp|P40124|CAP1_MOUSE	Cap1	5	5	810000	0.00257		sp|Q06890|CLUS_MOUSE	Clu
	sp|Q8CGK3|LONM_MOUSE	Lonp1	3	3	100000	0.000611			sp|Q60648|SAP3_MOUSE	Gm2a	3	5	3100000	0.0079			sp|P62627|DLRB1_MOUSE	Dynlrb1	3	4	2400000	0.00933			sp|Q7TQ95|LNP_MOUSE	Lnp	5	8	1300000	0.0025			sp|P60904|DNJC5_MOUSE	Dnajc5	5	18	59000000	0.14			sp|P80560|PTPR2_MOUSE	Ptprn2	5	5	670000	0.00213		sp|P09055|ITB1_MOUSE	Itgb1
	sp|P56371|RAB4A_MOUSE	Rab4a	3	3	1500000	0.00869			sp|Q9DBL1|ACDSB_MOUSE	Acadsb	3	4	420000	0.00105			sp|Q5SQY2|BOD1_MOUSE	Bod1	3	4	510000	0.00204			sp|Q8JZM4|DNER_MOUSE	Dner	5	8	4400000	0.00829			sp|Q9Z127|LAT1_MOUSE	Slc7a5	5	17	30000000	0.0698			sp|Q63844|MK03_MOUSE	Mapk3	5	5	1000000	0.00327		sp|O89053|COR1A_MOUSE	Coro1a
	sp|Q922Y1|UBXN1_MOUSE	Ubxn1	3	3	93000	0.000547			sp|Q920E5|FPPS_MOUSE	Fdps	3	4	1400000	0.00344			sp|Q8BXR1|S7A14_MOUSE	Slc7a14	3	4	270000	0.00105			sp|Q8R464|CADM4_MOUSE	Cadm4	5	8	14000000	0.0269			sp|P17156|HSP72_MOUSE	Hspa2	5	13	73000000	0.17			sp|P32020|NLTP_MOUSE	Scp2	5	5	2500000	0.00805		sp|P35951|LDLR_MOUSE	Ldlr
	sp|Q9DCB8|ISCA2_MOUSE	Isca2	3	3	290000	0.00173			sp|Q9CQD1|RAB5A_MOUSE	Rab5a	3	4	1100000	0.00264			sp|Q60597|ODO1_MOUSE	Ogdh	3	4	530000	0.00211			sp|Q6P1D5|SE6L1_MOUSE	Sez6l	5	8	36000000	0.0679			sp|Q69ZS6|SV2C_MOUSE	Sv2c	5	13	46000000	0.11			sp|Q9JL56|GDE1_MOUSE	Gde1	5	5	1800000	0.00579		sp|P06745|G6PI_MOUSE	Gpi
	sp|Q9JLB9|NECT3_MOUSE	Nectin3	3	3	420000	0.00248			sp|Q62419|SH3G1_MOUSE	Sh3gl1	3	4	1800000	0.0046			sp|Q9R0P5|DEST_MOUSE	Dstn	3	4	1100000	0.00447			sp|P97450|ATP5J_MOUSE	Atp5j	5	8	14000000	0.0271			sp|Q9CQV8|1433B_MOUSE	Ywhab	5	12	4400000	0.0103			sp|P63044|VAMP2_MOUSE	Vamp2	4	21	310000000	0.99		sp|Q8VEM8|MPCP_MOUSE	Slc25a3
	sp|Q6PDS3|SARM1_MOUSE	Sarm1	3	3	150000	0.000905			sp|O08539|BIN1_MOUSE	Bin1	3	4	450000	0.00114			sp|Q80TR1|AGRL1_MOUSE	Adgrl1	3	4	300000	0.0012			sp|P63040|CPLX1_MOUSE	Cplx1	5	8	17000000	0.0318			sp|P28667|MRP_MOUSE	Marcksl1	5	11	16000000	0.0367			sp|P01831|THY1_MOUSE	Thy1	4	20	140000000	0.44		sp|P14152|MDHC_MOUSE	Mdh1
	sp|Q8BGR6|ARL15_MOUSE	Arl15	3	3	230000	0.00133			sp|Q8HW98|IGLO5_MOUSE	Iglon5	3	4	1200000	0.003			sp|P21107|TPM3_MOUSE	Tpm3	3	4	1400000	0.00558			sp|Q9CZY3|UB2V1_MOUSE	Ube2v1	5	8	71000000	0.14			sp|O35609|SCAM3_MOUSE	Scamp3	5	10	19000000	0.0435			IGKC_MOUSE		4	18	86000000	0.27		sp|P59017|B2L13_MOUSE	Bcl2l13
	sp|Q9D172|ES1_MOUSE	D10Jhu81e	3	3	470000	0.00277			sp|Q921J2|RHEB_MOUSE	Rheb	3	4	5700000	0.0142			sp|P54830|PTN5_MOUSE	Ptpn5	3	4	230000	0.000929			sp|Q61171|PRDX2_MOUSE	Prdx2	5	8	4000000	0.00762			sp|Q8VHW2|CCG8_MOUSE	Cacng8	5	10	3700000	0.00849			sp|P28667|MRP_MOUSE	Marcksl1	4	15	26000000	0.0832		sp|P48320|DCE2_MOUSE	Gad2
	sp|Q8K2Q9|SHOT1_MOUSE	Shtn1	3	3	180000	0.00104			tr|E9Q137|E9Q137_MOUSE	Tex264	3	4	400000	0.00102			sp|Q4VAE3|TMM65_MOUSE	Tmem65	3	4	840000	0.00331			sp|Q6PDL0|DC1L2_MOUSE	Dync1li2	5	8	1900000	0.00364			sp|P63040|CPLX1_MOUSE	Cplx1	5	10	32000000	0.0743			sp|O70456|1433S_MOUSE	Sfn	4	14	96000000	0.31		sp|D3YZP9|CCDC6_MOUSE	Ccdc6
	sp|P0C192|LRC4B_MOUSE	Lrrc4b	3	3	230000	0.00137			tr|Q3UTP0|Q3UTP0_MOUSE	Pcdh17	3	4	680000	0.0017			sp|Q69ZS6|SV2C_MOUSE	Sv2c	3	4	780000	0.00307			sp|O08795|GLU2B_MOUSE	Prkcsh	5	7	4200000	0.00803			sp|Q7TQ95|LNP_MOUSE	Lnp	5	9	1600000	0.00378			sp|Q9Z1W8|AT12A_MOUSE	Atp12a	4	14	90000000	0.29		sp|Q9Z2X1|HNRPF_MOUSE	Hnrnpf
	sp|Q8VEL2|MTMRE_MOUSE	Mtmr14	3	3	75000	0.000441			sp|Q9WTX5|SKP1_MOUSE	Skp1	3	4	1000000	0.00263			sp|P50153|GBG4_MOUSE	Gng4	3	4	3900000	0.0154			tr|Q3UTP0|Q3UTP0_MOUSE	Pcdh17	5	7	1800000	0.0034			sp|Q9D6F9|TBB4A_MOUSE	Tubb4a	5	9	9200000	0.0212			sp|Q9WV27|AT1A4_MOUSE	Atp1a4	4	12	36000000	0.12		sp|Q9JLM8|DCLK1_MOUSE	Dclk1
	sp|Q99LI8|HGS_MOUSE	Hgs	3	3	410000	0.00244			sp|Q8R2Y8|PTH2_MOUSE	Ptrh2	3	4	450000	0.00113			sp|P17047|LAMP2_MOUSE	Lamp2	3	4	700000	0.00278			tr|Q9Z1A1|Q9Z1A1_MOUSE	Tfg	5	7	5200000	0.00981			sp|P62835|RAP1A_MOUSE	Rap1a	5	9	16000000	0.0362			sp|P24668|MPRD_MOUSE	M6pr	4	11	3300000	0.0104		sp|P62627|DLRB1_MOUSE	Dynlrb1
	sp|Q9D4C9|CLVS1_MOUSE	Clvs1	3	3	290000	0.00172			sp|Q8VDP6|CDIPT_MOUSE	Cdipt	3	4	610000	0.00153			sp|O89053|COR1A_MOUSE	Coro1a	3	4	230000	0.000905			sp|Q9WV55|VAPA_MOUSE	Vapa	5	7	3600000	0.0069			sp|P84075|HPCA_MOUSE	Hpca	5	9	22000000	0.0504			sp|Q9CQX2|CYB5B_MOUSE	Cyb5b	4	11	12000000	0.0383		sp|Q8VCS3|XYLK_MOUSE	Fam20b
	sp|O35887|CALU_MOUSE	Calu	3	3	100000	0.000602			sp|Q9D2M8|UB2V2_MOUSE	Ube2v2	3	4	970000	0.00244			sp|Q9WTT4|VATG2_MOUSE	Atp6v1g2	3	3	390000	0.00153			sp|Q9QYC0|ADDA_MOUSE	Add1	5	7	2600000	0.00491			sp|Q9R013|CATF_MOUSE	Ctsf	5	9	9000000	0.0208			sp|P14231|AT1B2_MOUSE	Atp1b2	4	10	11000000	0.0353		sp|Q9QXY6|EHD3_MOUSE	Ehd3
	sp|P54923|ADPRH_MOUSE	Adprh	3	3	130000	0.000776			sp|P05064|ALDOA_MOUSE	Aldoa	3	4	1200000	0.0029			sp|P52875|TM165_MOUSE	Tmem165	3	3	310000	0.00125			sp|P15209|NTRK2_MOUSE	Ntrk2	5	7	5000000	0.0095			sp|P68254|1433T_MOUSE	Ywhaq	5	8	7700000	0.0177			sp|Q9WTT4|VATG2_MOUSE	Atp6v1g2	4	9	4300000	0.0136		sp|Q61081|CDC37_MOUSE	Cdc37
	sp|P32921|SYWC_MOUSE	Wars	3	3	95000	0.00056			sp|Q8VEK0|CC50A_MOUSE	Tmem30a	3	4	790000	0.002			sp|Q6KAU4|MB12B_MOUSE	Mvb12b	3	3	420000	0.00168			sp|Q91XL9|OSBL1_MOUSE	Osbpl1a	5	7	1500000	0.00286			sp|P51880|FABP7_MOUSE	Fabp7	5	8	8700000	0.02			sp|P36536|SAR1A_MOUSE	Sar1a	4	9	10000000	0.0328		sp|P16125|LDHB_MOUSE	Ldhb
	sp|Q921G7|ETFD_MOUSE	Etfdh	3	3	180000	0.00107			sp|P68037|UB2L3_MOUSE	Ube2l3	3	4	1600000	0.0041			sp|Q6PCX7|RGMA_MOUSE	Rgma	3	3	500000	0.00198			sp|P62331|ARF6_MOUSE	Arf6	5	7	4100000	0.00777			sp|Q62048|PEA15_MOUSE	Pea15	5	8	3400000	0.0078			sp|P18760|COF1_MOUSE	Cfl1	4	8	14000000	0.0432		sp|Q8R180|ERO1A_MOUSE	Ero1a
	sp|Q6NZC7|S23IP_MOUSE	Sec23ip	3	3	110000	0.000627			sp|O88712|CTBP1_MOUSE	Ctbp1	3	4	1600000	0.00409			sp|Q91Z38|TTC1_MOUSE	Ttc1	3	3	450000	0.00179			sp|P08226|APOE_MOUSE	Apoe	5	7	5200000	0.00998			sp|P17047|LAMP2_MOUSE	Lamp2	5	8	3700000	0.00857			sp|P55821|STMN2_MOUSE	Stmn2	4	8	9100000	0.0291		sp|Q9D172|ES1_MOUSE	D10Jhu81e
	sp|Q5DQR4|STB5L_MOUSE	Stxbp5l	3	3	140000	0.000833			sp|O70493|SNX12_MOUSE	Snx12	3	4	1700000	0.00438			sp|P59017|B2L13_MOUSE	Bcl2l13	3	3	680000	0.0027			sp|Q8R1V4|TMED4_MOUSE	Tmed4	5	7	6100000	0.0116			sp|P56564|EAA1_MOUSE	Slc1a3	5	7	2700000	0.00629			tr|D3YZZ5|D3YZZ5_MOUSE	Tmed7	4	8	12000000	0.0378		sp|Q9R0P5|DEST_MOUSE	Dstn
	sp|Q3UEB3|PUF60_MOUSE	Puf60	3	3	260000	0.00156			tr|B8JJG7|B8JJG7_MOUSE	Tfg	3	4	7900000	0.0198			sp|Q9D7E4|CS025_MOUSE		3	3	550000	0.00218			sp|Q9CRY7|GDPD1_MOUSE	Gdpd1	5	6	2400000	0.00464			sp|P99027|RLA2_MOUSE	Rplp2	5	7	24000000	0.0564			sp|P11438|LAMP1_MOUSE	Lamp1	4	8	5300000	0.017		sp|Q9DCP2|S38A3_MOUSE	Slc38a3
	sp|Q9Z0M5|LICH_MOUSE	Lipa	3	3	170000	0.00102			sp|Q9WTQ8|TIM23_MOUSE	Timm23	3	4	480000	0.00121			sp|Q9QYG0|NDRG2_MOUSE	Ndrg2	3	3	410000	0.00164			sp|Q9DC51|GNAI3_MOUSE	Gnai3	5	6	2500000	0.00479			sp|Q8JZM4|DNER_MOUSE	Dner	5	7	2800000	0.00643			sp|O70251|EF1B_MOUSE	Eef1b	4	7	4000000	0.0127		sp|Q8BKC5|IPO5_MOUSE	Ipo5
	sp|P09055|ITB1_MOUSE	Itgb1	3	3	220000	0.0013			sp|Q8BHK2|SCN3B_MOUSE	Scn3b	3	4	2400000	0.00613			sp|P32507|NECT2_MOUSE	Nectin2	3	3	490000	0.00196			sp|P51880|FABP7_MOUSE	Fabp7	5	6	4200000	0.008			sp|Q8R464|CADM4_MOUSE	Cadm4	5	7	15000000	0.0338			sp|P09671|SODM_MOUSE	Sod2	4	7	10000000	0.0324		sp|O35737|HNRH1_MOUSE	Hnrnph1
	sp|P47757|CAPZB_MOUSE	Capzb	3	3	140000	0.000798			sp|P49443|PPM1A_MOUSE	Ppm1a	3	4	750000	0.00187			sp|O35887|CALU_MOUSE	Calu	3	3	490000	0.00195			sp|Q62418|DBNL_MOUSE	Dbnl	5	6	2500000	0.00482			sp|P15209|NTRK2_MOUSE	Ntrk2	5	7	4000000	0.00918			sp|O70492|SNX3_MOUSE	Snx3	4	7	6800000	0.0217		sp|P31938|MP2K1_MOUSE	Map2k1
	sp|Q5SQY2|BOD1_MOUSE	Bod1	3	3	250000	0.00146			sp|P20108|PRDX3_MOUSE	Prdx3	3	4	1500000	0.00378			sp|Q9DC51|GNAI3_MOUSE	Gnai3	3	3	560000	0.00221			sp|Q9DC07|LNEBL_MOUSE	Nebl	5	6	5500000	0.0104			sp|Q9R1J0|NSDHL_MOUSE	Nsdhl	5	7	20000000	0.047			sp|P15920|VPP2_MOUSE	Atp6v0a2	4	7	21000000	0.0667		sp|P40124|CAP1_MOUSE	Cap1
	sp|Q8BLN5|ERG7_MOUSE	Lss	3	3	150000	0.000911			sp|O35188|X3CL1_MOUSE	Cx3cl1	3	4	6200000	0.0156			sp|Q9D880|TIM50_MOUSE	Timm50	3	3	340000	0.00133			sp|Q91V12|BACH_MOUSE	Acot7	5	6	3900000	0.00738			sp|Q8R3V5|SHLB2_MOUSE	Sh3glb2	5	7	5200000	0.012			sp|P63040|CPLX1_MOUSE	Cplx1	4	7	35000000	0.11		sp|P56399|UBP5_MOUSE	Usp5
	sp|Q64310|SURF4_MOUSE	Surf4	3	3	1000000	0.00602			sp|P61082|UBC12_MOUSE	Ube2m	3	4	3200000	0.00803			sp|Q8C0J2|A16L1_MOUSE	Atg16l1	3	3	390000	0.00156			sp|P70168|IMB1_MOUSE	Kpnb1	5	6	2200000	0.00421			sp|P15532|NDKA_MOUSE	Nme1	5	7	3200000	0.00736			sp|Q8BKC5|IPO5_MOUSE	Ipo5	4	6	610000	0.00193		sp|Q9D7A8|ARMC1_MOUSE	Armc1
	sp|Q3V3I2|GNAT3_MOUSE	Gnat3	2	20	95000000	0.56			sp|Q6VNS1|NTRK3_MOUSE	Ntrk3	3	4	1000000	0.00263			sp|P70423|CTR3_MOUSE	Slc7a3	3	3	490000	0.00192			sp|Q9R0P9|UCHL1_MOUSE	Uchl1	5	6	2600000	0.00492			sp|Q80UU9|PGRC2_MOUSE	Pgrmc2	5	6	3600000	0.00819			sp|Q8CAY6|THIC_MOUSE	Acat2	4	6	960000	0.00306		sp|Q7TNR6|IGS21_MOUSE	Igsf21
	tr|A0A0A6YWR2|A0A0A6YWR2_MOUSE	Ighg1	2	16	100000000	0.62			sp|Q8BJU0|SGTA_MOUSE	Sgta	3	4	1400000	0.00344			sp|Q8QZT1|THIL_MOUSE	Acat1	3	3	350000	0.00139			sp|P47757|CAPZB_MOUSE	Capzb	5	6	2300000	0.00446			sp|Q9CQD1|RAB5A_MOUSE	Rab5a	5	6	5600000	0.013			sp|Q80ZJ1|RAP2A_MOUSE	Rap2a	4	6	3200000	0.0102		sp|Q6P5E6|GGA2_MOUSE	Gga2
	sp|Q71FD5|ZNRF2_MOUSE	Znrf2	2	15	1300000	0.00754			sp|O35609|SCAM3_MOUSE	Scamp3	3	3	1200000	0.0029			sp|Q8VDQ8|SIR2_MOUSE	Sirt2	3	3	1000000	0.00407			sp|O54865|GCYB1_MOUSE	Gucy1b3	5	6	1800000	0.00344			sp|Q9R257|HEBP1_MOUSE	Hebp1	5	6	8100000	0.0187			sp|Q8R464|CADM4_MOUSE	Cadm4	4	6	6200000	0.0197		sp|Q9CQZ1|HSBP1_MOUSE	Hsbp1
	tr|E9QB01|E9QB01_MOUSE	Ncam1	2	15	10000000	0.0606			sp|P52875|TM165_MOUSE	Tmem165	3	3	590000	0.00148			sp|P35288|RAB23_MOUSE	Rab23	3	3	520000	0.00206			sp|P61979|HNRPK_MOUSE	Hnrnpk	5	6	2100000	0.00407			sp|P70404|IDHG1_MOUSE	Idh3g	5	6	3000000	0.00681			sp|Q6ZQI3|MLEC_MOUSE	Mlec	4	6	3700000	0.0118		sp|Q9DBS2|TPRGL_MOUSE	Tprg1l
	sp|Q9D6P8|CALL3_MOUSE	Calml3	2	15	3800000	0.0223			sp|Q9WTT4|VATG2_MOUSE	Atp6v1g2	3	3	570000	0.00142			sp|P55821|STMN2_MOUSE	Stmn2	3	3	1700000	0.00668			sp|Q9Z1R2|BAG6_MOUSE	Bag6	5	6	1100000	0.00207			sp|P61982|1433G_MOUSE	Ywhag	5	6	13000000	0.0298			sp|O09126|SEM4D_MOUSE	Sema4d	4	6	990000	0.00317		sp|Q8BGT1|FLRT3_MOUSE	Flrt3
	sp|P60761|NEUG_MOUSE	Nrgn	2	14	4700000	0.0279			sp|Q61644|PACN1_MOUSE	Pacsin1	3	3	530000	0.00134			sp|O09111|NDUBB_MOUSE	Ndufb11	3	3	290000	0.00117			sp|Q9D8Y0|EFHD2_MOUSE	Efhd2	5	6	1300000	0.00252			sp|Q9CX34|SGT1_MOUSE	Sugt1	5	6	1800000	0.00415			sp|Q920E5|FPPS_MOUSE	Fdps	4	6	1800000	0.00564		sp|Q9CXW3|CYBP_MOUSE	Cacybp
	sp|P35802|GPM6A_MOUSE	Gpm6a	2	13	19000000	0.11			sp|P20357|MTAP2_MOUSE	Map2	3	3	280000	0.0007			sp|Q9WVK4|EHD1_MOUSE	Ehd1	3	3	460000	0.00181			sp|Q9CQC9|SAR1B_MOUSE	Sar1b	5	6	2200000	0.00425			sp|P70168|IMB1_MOUSE	Kpnb1	5	6	1100000	0.00251			sp|Q9WTL7|LYPA2_MOUSE	Lypla2	4	6	3000000	0.00968		sp|Q6RHR9|MAGI1_MOUSE	Magi1
	sp|P24668|MPRD_MOUSE	M6pr	2	12	880000	0.00519			sp|Q8R1N4|NUDC3_MOUSE	Nudcd3	3	3	450000	0.00113			sp|P30275|KCRU_MOUSE	Ckmt1	3	3	580000	0.00229			sp|Q8R4C2|RUFY2_MOUSE	Rufy2	5	6	6200000	0.0119			sp|Q8K221|ARFP2_MOUSE	Arfip2	5	6	2600000	0.00609			sp|Q9R1Q8|TAGL3_MOUSE	Tagln3	4	6	3100000	0.00979		sp|Q9CYZ2|TPD54_MOUSE	Tpd52l2
	sp|P17879|HS71B_MOUSE	Hspa1b	2	12	43000000	0.25			sp|P63330|PP2AA_MOUSE	Ppp2ca	3	3	690000	0.00174			sp|P63082|VATL_MOUSE	Atp6v0c	3	3	610000	0.00243			sp|Q8BTG7|NDRG4_MOUSE	Ndrg4	5	6	3700000	0.00698			sp|Q6P6J9|TXD15_MOUSE	Txndc15	5	6	2300000	0.00525			sp|O88531|PPT1_MOUSE	Ppt1	4	6	7100000	0.0225		sp|Q9WV80|SNX1_MOUSE	Snx1
	sp|O55100|SNG1_MOUSE	Syngr1	2	11	6500000	0.0384			sp|Q78JW9|UBFD1_MOUSE	Ubfd1	3	3	1700000	0.00418			sp|P56564|EAA1_MOUSE	Slc1a3	3	3	350000	0.00139			sp|O08539|BIN1_MOUSE	Bin1	5	6	890000	0.00169			sp|Q6ZQI3|MLEC_MOUSE	Mlec	5	6	3900000	0.00897			sp|P62331|ARF6_MOUSE	Arf6	4	6	3000000	0.00942		sp|Q63844|MK03_MOUSE	Mapk3
	sp|P18760|COF1_MOUSE	Cfl1	2	10	4800000	0.0282			sp|Q8CI61|BAG4_MOUSE	Bag4	3	3	530000	0.00132			sp|Q61753|SERA_MOUSE	Phgdh	3	3	440000	0.00175			sp|Q9D7N9|APMAP_MOUSE	Apmap	5	6	2400000	0.00458			sp|Q8CAY6|THIC_MOUSE	Acat2	5	6	1000000	0.00236			sp|Q8BFZ9|ERLN2_MOUSE	Erlin2	4	6	740000	0.00238		sp|Q9DBJ1|PGAM1_MOUSE	Pgam1
	sp|P14231|AT1B2_MOUSE	Atp1b2	2	10	3000000	0.0175			sp|P56812|PDCD5_MOUSE	Pdcd5	3	3	2200000	0.00541			sp|Q6PCP5|MFF_MOUSE	Mff	3	3	370000	0.00147			sp|P17047|LAMP2_MOUSE	Lamp2	5	6	3900000	0.00751			sp|Q99MN9|PCCB_MOUSE	Pccb	5	6	890000	0.00206			sp|Q9DC51|GNAI3_MOUSE	Gnai3	4	5	1200000	0.00378		sp|Q8BRF7|SCFD1_MOUSE	Scfd1
	sp|O09044|SNP23_MOUSE	Snap23	2	10	650000	0.00385			sp|P57746|VATD_MOUSE	Atp6v1d	3	3	870000	0.00218			sp|P20444|KPCA_MOUSE	Prkca	3	3	240000	0.000938			sp|Q80UU9|PGRC2_MOUSE	Pgrmc2	5	5	2300000	0.00442			sp|P63005|LIS1_MOUSE	Pafah1b1	5	6	4000000	0.00923			sp|P56564|EAA1_MOUSE	Slc1a3	4	5	1800000	0.00585		tr|B2RXT3|B2RXT3_MOUSE	Ogdhl
	sp|Q62159|RHOC_MOUSE	Rhoc	2	9	5200000	0.0308			sp|O35643|AP1B1_MOUSE	Ap1b1	3	3	750000	0.00189			sp|Q9QYI3|DNJC7_MOUSE	Dnajc7	3	3	350000	0.00138			sp|Q9R257|HEBP1_MOUSE	Hebp1	5	5	3900000	0.00734			sp|O88507|CNTFR_MOUSE	Cntfr	5	6	2700000	0.00619			sp|Q9WV34|MPP2_MOUSE	Mpp2	4	5	1100000	0.00366		sp|Q8BWT1|THIM_MOUSE	Acaa2
	tr|Q5SUH6|Q5SUH6_MOUSE	Clint1	2	8	5500000	0.0325			sp|P35288|RAB23_MOUSE	Rab23	3	3	820000	0.00205			sp|Q05186|RCN1_MOUSE	Rcn1	3	3	330000	0.00129			sp|O35607|BMPR2_MOUSE	Bmpr2	5	5	2100000	0.00399			sp|O70492|SNX3_MOUSE	Snx3	5	6	6200000	0.0143			sp|Q6PCX7|RGMA_MOUSE	Rgma	4	5	1500000	0.00465		sp|A2ALU4|SHRM2_MOUSE	Shroom2
	sp|P62737|ACTA_MOUSE	Acta2	2	8	1900000	0.0112			sp|Q8JZM4|DNER_MOUSE	Dner	3	3	650000	0.00164			sp|Q9CPT4|MYDGF_MOUSE	Mydgf	3	3	1500000	0.00588			sp|Q99JB2|STML2_MOUSE	Stoml2	5	5	1100000	0.00203			sp|Q99LP6|GRPE1_MOUSE	Grpel1	5	6	2000000	0.00458			sp|Q8C0E2|VP26B_MOUSE	Vps26b	4	5	1500000	0.0047		sp|Q6PGE7|SC6A7_MOUSE	Slc6a7
	sp|P26883|FKB1A_MOUSE	Fkbp1a	2	7	4400000	0.0262			sp|Q9DC51|GNAI3_MOUSE	Gnai3	3	3	770000	0.00194			sp|Q9CQZ1|HSBP1_MOUSE	Hsbp1	3	3	210000	0.000822			sp|Q99PT1|GDIR1_MOUSE	Arhgdia	5	5	2900000	0.0056			sp|P09055|ITB1_MOUSE	Itgb1	5	6	3700000	0.00848			sp|O88935|SYN1_MOUSE	Syn1	4	5	510000	0.00163		sp|Q62318|TIF1B_MOUSE	Trim28
	tr|Q14BH8|Q14BH8_MOUSE	Cacna2d1	2	7	900000	0.00533			sp|Q91WS0|CISD1_MOUSE	Cisd1	3	3	960000	0.0024			sp|P63054|PCP4_MOUSE	Pcp4	3	3	300000	0.00117			sp|P59017|B2L13_MOUSE	Bcl2l13	5	5	3100000	0.00583			sp|P63080|GBRB3_MOUSE	Gabrb3	5	6	1100000	0.00251			sp|Q8K2C7|OS9_MOUSE	Os9	4	5	1100000	0.00366		sp|Q5RKR3|ISLR2_MOUSE	Islr2
	sp|P31648|SC6A1_MOUSE	Slc6a1	2	7	8000000	0.0472			sp|Q8C0J2|A16L1_MOUSE	Atg16l1	3	3	530000	0.00134			sp|Q62318|TIF1B_MOUSE	Trim28	3	3	340000	0.00133			sp|Q91YJ2|SNX4_MOUSE	Snx4	5	5	1500000	0.0028			sp|P52800|EFNB2_MOUSE	Efnb2	5	6	1400000	0.00318			sp|Q8BHK2|SCN3B_MOUSE	Scn3b	4	5	1700000	0.00535		sp|Q80WQ2|VAC14_MOUSE	Vac14
	sp|P36536|SAR1A_MOUSE	Sar1a	2	7	12000000	0.0738			sp|Q9CRD0|OCAD1_MOUSE	Ociad1	3	3	550000	0.00139			sp|Q9R111|GUAD_MOUSE	Gda	3	3	210000	0.000813			sp|Q6PCX7|RGMA_MOUSE	Rgma	5	5	1900000	0.00359			sp|Q9CQA3|SDHB_MOUSE	Sdhb	5	6	3900000	0.00891			sp|O54865|GCYB1_MOUSE	Gucy1b3	4	5	720000	0.0023		sp|Q01279|EGFR_MOUSE	Egfr
	sp|Q9R0Q3|TMED2_MOUSE	Tmed2	2	7	600000	0.00356			sp|P70663|SPRL1_MOUSE	Sparcl1	3	3	300000	0.000757			sp|P61924|COPZ1_MOUSE	Copz1	3	3	250000	0.000979			sp|Q62393|TPD52_MOUSE	Tpd52	5	5	1600000	0.00308			sp|P61750|ARF4_MOUSE	Arf4	5	6	4800000	0.0112			sp|Q9CX34|SGT1_MOUSE	Sugt1	4	5	720000	0.0023		sp|P97441|ZNT3_MOUSE	Slc30a3
	sp|P63024|VAMP3_MOUSE	Vamp3	2	6	58000000	0.34			sp|P05132|KAPCA_MOUSE	Prkaca	3	3	660000	0.00165			sp|P14824|ANXA6_MOUSE	Anxa6	3	3	250000	0.000995			sp|P70175|DLG3_MOUSE	Dlg3	5	5	1100000	0.00204			sp|Q62418|DBNL_MOUSE	Dbnl	5	5	2300000	0.00537			sp|Q9DBL1|ACDSB_MOUSE	Acadsb	4	5	720000	0.00229		sp|Q91YT0|NDUV1_MOUSE	Ndufv1
	sp|Q61036|PAK3_MOUSE	Pak3	2	6	230000	0.00138			sp|Q05909|PTPRG_MOUSE	Ptprg	3	3	680000	0.0017			sp|P27601|GNA13_MOUSE	Gna13	3	3	370000	0.00147			sp|P35821|PTN1_MOUSE	Ptpn1	5	5	1300000	0.00241			sp|O35887|CALU_MOUSE	Calu	5	5	1500000	0.00349			sp|Q8CGK3|LONM_MOUSE	Lonp1	4	5	860000	0.00275		sp|Q9WVG6|CARM1_MOUSE	Carm1
	tr|G5E8R2|G5E8R2_MOUSE	Tpm1	2	6	380000	0.00227			sp|O35678|MGLL_MOUSE	Mgll	3	3	690000	0.00174			sp|Q9CQ48|NUDC2_MOUSE	Nudcd2	3	3	290000	0.00116			sp|Q62465|VAT1_MOUSE	Vat1	5	5	2400000	0.00463			sp|P12367|KAP2_MOUSE	Prkar2a	5	5	3300000	0.00757			sp|O70591|PFD2_MOUSE	Pfdn2	4	5	1100000	0.00348		sp|Q8C1B7|SEP11_MOUSE	2017-09-11
	sp|P63213|GBG2_MOUSE	Gng2	2	6	26000000	0.16			sp|O35607|BMPR2_MOUSE	Bmpr2	3	3	370000	0.000933			sp|Q9DAU1|CNPY3_MOUSE	Cnpy3	3	3	380000	0.00149			sp|P97384|ANX11_MOUSE	Anxa11	5	5	1600000	0.00308			sp|Q07813|BAX_MOUSE	Bax	5	5	1200000	0.00278			sp|Q8R332|NUP58_MOUSE	Nup58	4	5	2500000	0.00796		sp|P29341|PABP1_MOUSE	Pabpc1
	sp|Q91W97|HKDC1_MOUSE	Hkdc1	2	6	3600000	0.0212			sp|Q91ZA3|PCCA_MOUSE	Pcca	3	3	300000	0.000755			sp|P62075|TIM13_MOUSE	Timm13	3	3	600000	0.00236			sp|Q9D074|MGRN1_MOUSE	Mgrn1	5	5	1900000	0.00354			sp|Q9D074|MGRN1_MOUSE	Mgrn1	5	5	1300000	0.00309			sp|P12023|A4_MOUSE	App	4	5	770000	0.00246		sp|Q8R0H9|GGA1_MOUSE	Gga1
	sp|P15920|VPP2_MOUSE	Atp6v0a2	2	6	1000000	0.0059			sp|P54754|EPHB3_MOUSE	Ephb3	3	3	290000	0.000738			sp|Q6V4S5|SDK2_MOUSE	Sdk2	3	3	170000	0.000678			sp|P63005|LIS1_MOUSE	Pafah1b1	5	5	2800000	0.00537			sp|Q8BRF7|SCFD1_MOUSE	Scfd1	5	5	1100000	0.00246			sp|Q9QYI5|DNJB2_MOUSE	Dnajb2	4	5	2500000	0.00803		sp|P14824|ANXA6_MOUSE	Anxa6
	tr|A0A0R4J1Z7|A0A0R4J1Z7_MOUSE	Sirpa	2	5	3200000	0.0191			sp|Q3UDR8|YIPF3_MOUSE	Yipf3	3	3	630000	0.00158			sp|Q922D8|C1TC_MOUSE	Mthfd1	3	3	210000	0.000844			sp|Q9DAW9|CNN3_MOUSE	Cnn3	5	5	1500000	0.00285			sp|Q8BL86|MBLC2_MOUSE	Mblac2	5	5	3000000	0.00699			sp|Q8VDP6|CDIPT_MOUSE	Cdipt	4	5	2900000	0.00928		sp|P68404|KPCB_MOUSE	Prkcb
	sp|P03930|ATP8_MOUSE	Mtatp8	2	5	3100000	0.0185			sp|Q9D3A9|TTYH1_MOUSE	Ttyh1	3	3	1000000	0.00253			tr|Q14BH8|Q14BH8_MOUSE	Cacna2d1	3	3	2000000	0.0078			sp|Q811D0|DLG1_MOUSE	Dlg1	5	5	1500000	0.00278			sp|Q99L47|F10A1_MOUSE	St13	5	5	2400000	0.00552			sp|Q9CR95|NECP1_MOUSE	Necap1	4	5	4600000	0.0146		sp|P42932|TCPQ_MOUSE	Cct8
	sp|P48771|CX7A2_MOUSE	Cox7a2	2	5	1900000	0.0111			sp|Q7TQI3|OTUB1_MOUSE	Otub1	3	3	380000	0.000944			sp|Q9CZD3|GARS_MOUSE	Gars	3	3	360000	0.00143			sp|Q3UH93|PLXD1_MOUSE	Plxnd1	5	5	1700000	0.00323			sp|Q9D164|FXYD6_MOUSE	Fxyd6	5	5	4800000	0.011			sp|Q9DBS1|TMM43_MOUSE	Tmem43	4	5	1500000	0.00478		sp|Q920N7|SYT12_MOUSE	Syt12
	sp|Q9CRA4|MSMO1_MOUSE	Msmo1	2	5	290000	0.00173			sp|O70591|PFD2_MOUSE	Pfdn2	3	3	1300000	0.00318			sp|Q99KU0|VMP1_MOUSE	Vmp1	3	3	460000	0.00183			sp|O88935|SYN1_MOUSE	Syn1	5	5	1100000	0.00217			sp|Q8BR92|PALM2_MOUSE	Palm2	5	5	1800000	0.00425			sp|Q8BNU0|ARMC6_MOUSE	Armc6	4	5	920000	0.00293		sp|O70589|CSKP_MOUSE	Cask
	sp|P32507|NECT2_MOUSE	Nectin2	2	4	220000	0.00129			sp|Q9DCS9|NDUBA_MOUSE	Ndufb10	3	3	410000	0.00102			sp|Q6PGF7|EXOC8_MOUSE	Exoc8	3	3	310000	0.00124			sp|Q8CHU3|EPN2_MOUSE	Epn2	5	5	930000	0.00177			sp|P98156|VLDLR_MOUSE	Vldlr	5	5	910000	0.00209			sp|Q8BM72|HSP13_MOUSE	Hspa13	4	5	2500000	0.00785		sp|Q9D8N0|EF1G_MOUSE	Eef1g
	sp|O70480|VAMP4_MOUSE	Vamp4	2	4	270000	0.00159			sp|Q01853|TERA_MOUSE	Vcp	3	3	480000	0.00119			sp|Q99J99|THTM_MOUSE	Mpst	3	3	240000	0.00094			sp|Q8BX94|OSBL2_MOUSE	Osbpl2	5	5	1100000	0.00209			sp|P30275|KCRU_MOUSE	Ckmt1	5	5	2200000	0.00503			sp|P56818|BACE1_MOUSE	Bace1	4	5	2100000	0.00684		sp|P70429|EVL_MOUSE	Evl
	sp|Q9D898|ARP5L_MOUSE	Arpc5l	2	4	760000	0.00451			sp|Q9QYI3|DNJC7_MOUSE	Dnajc7	3	3	540000	0.00134			sp|P05064|ALDOA_MOUSE	Aldoa	3	3	440000	0.00173			sp|Q8C7E9|CSTFT_MOUSE	Cstf2t	5	5	830000	0.00158			sp|Q62393|TPD52_MOUSE	Tpd52	5	5	1500000	0.00349			sp|O35188|X3CL1_MOUSE	Cx3cl1	4	5	2100000	0.00676		sp|Q923L3|CSMD1_MOUSE	Csmd1
	sp|Q9WV55|VAPA_MOUSE	Vapa	2	4	1000000	0.00599			sp|Q80V26|IMPA3_MOUSE	Impad1	3	3	2200000	0.0055			sp|Q9D0F3|LMAN1_MOUSE	Lman1	3	3	320000	0.00127			sp|Q99L47|F10A1_MOUSE	St13	5	5	3100000	0.0059			sp|Q62465|VAT1_MOUSE	Vat1	5	5	1600000	0.00367			sp|Q9D7A8|ARMC1_MOUSE	Armc1	4	5	1000000	0.00327		sp|Q5DQR4|STB5L_MOUSE	Stxbp5l
	sp|Q9QYA2|TOM40_MOUSE	Tomm40	2	4	690000	0.00408			sp|P59017|B2L13_MOUSE	Bcl2l13	3	3	1100000	0.00281			sp|O88342|WDR1_MOUSE	Wdr1	3	3	190000	0.000765			sp|P63085|MK01_MOUSE	Mapk1	5	5	1500000	0.00282			sp|O88935|SYN1_MOUSE	Syn1	5	5	850000	0.00196			sp|P61082|UBC12_MOUSE	Ube2m	4	5	2200000	0.00708		tr|B2RX09|B2RX09_MOUSE	Nrxn2
	sp|Q7TN79|AKA7G_MOUSE	Akap7	2	4	380000	0.00224			sp|P35293|RAB18_MOUSE	Rab18	3	3	1100000	0.00285			sp|P11404|FABPH_MOUSE	Fabp3	3	3	310000	0.00124			sp|Q3UDR8|YIPF3_MOUSE	Yipf3	5	5	3100000	0.00581			sp|Q3UDR8|YIPF3_MOUSE	Yipf3	5	5	2700000	0.00626			sp|Q9CZY3|UB2V1_MOUSE	Ube2v1	4	5	56000000	0.18		sp|Q6P2L7|CASC4_MOUSE	Casc4
	sp|P49443|PPM1A_MOUSE	Ppm1a	2	4	430000	0.00255			sp|Q99K10|NLGN1_MOUSE	Nlgn1	3	3	580000	0.00147			sp|Q8VDW0|DX39A_MOUSE	Ddx39a	3	3	910000	0.00363			sp|Q920V1|B3GL1_MOUSE	B3galnt1	5	5	1900000	0.00357			sp|O88447|KLC1_MOUSE	Klc1	5	5	910000	0.0021			sp|Q62418|DBNL_MOUSE	Dbnl	4	4	2000000	0.00625		sp|P01865|GCAM_MOUSE	Igh-1a
	sp|Q8BTG7|NDRG4_MOUSE	Ndrg4	2	4	910000	0.00539			sp|Q61330|CNTN2_MOUSE	Cntn2	3	3	340000	0.000854			sp|P35293|RAB18_MOUSE	Rab18	3	3	1100000	0.00423			sp|Q6PGE7|SC6A7_MOUSE	Slc6a7	5	5	2500000	0.00466			sp|P47757|CAPZB_MOUSE	Capzb	5	5	1800000	0.00404			sp|O08547|SC22B_MOUSE	Sec22b	4	4	2000000	0.00639		IGKC_MOUSE
	sp|O35454|CLCN6_MOUSE	Clcn6	2	4	190000	0.00114			sp|O88696|CLPP_MOUSE	Clpp	3	3	430000	0.00108			tr|Q3UTP0|Q3UTP0_MOUSE	Pcdh17	3	3	270000	0.00108			sp|Q8BUV8|GP107_MOUSE	Gpr107	5	5	1500000	0.00293			sp|Q8BW96|KCC1D_MOUSE	Camk1d	5	5	2600000	0.00606			sp|Q9WV92|E41L3_MOUSE	Epb41l3	4	4	580000	0.00186		sp|E9PUL5|PRRT2_MOUSE	Prrt2
	sp|Q9D3D9|ATPD_MOUSE	Atp5d	2	4	2400000	0.0139			sp|P47941|CRKL_MOUSE	Crkl	3	3	680000	0.00171			sp|Q9QZ06|TOLIP_MOUSE	Tollip	3	3	630000	0.0025			sp|Q9R0Y5|KAD1_MOUSE	Ak1	5	5	850000	0.00162			sp|Q02248|CTNB1_MOUSE	Ctnnb1	5	5	1100000	0.00243			sp|Q7TQ95|LNP_MOUSE	Lnp	4	4	600000	0.00191		sp|P99024|TBB5_MOUSE	Tubb5
	sp|Q8VDP6|CDIPT_MOUSE	Cdipt	2	4	740000	0.00438			sp|Q9WTP7|KAD3_MOUSE	Ak3	3	3	300000	0.000754			sp|Q9DB15|RM12_MOUSE	Mrpl12	3	3	730000	0.0029			sp|P40124|CAP1_MOUSE	Cap1	5	5	1400000	0.00265			sp|Q6PCP5|MFF_MOUSE	Mff	5	5	1100000	0.00256			sp|Q921E2|RAB31_MOUSE	Rab31	4	4	970000	0.0031		sp|Q9WV27|AT1A4_MOUSE	Atp1a4
	sp|Q9D0R8|LSM12_MOUSE	Lsm12	2	4	370000	0.00218			sp|Q99KV1|DJB11_MOUSE	Dnajb11	3	3	16000000	0.0404			sp|Q99MN9|PCCB_MOUSE	Pccb	3	3	96000	0.00038			sp|Q8VDW0|DX39A_MOUSE	Ddx39a	5	5	3400000	0.00652			sp|P14152|MDHC_MOUSE	Mdh1	5	5	1900000	0.00448			sp|Q91XM9|DLG2_MOUSE	Dlg2	4	4	1500000	0.00494		sp|P84075|HPCA_MOUSE	Hpca
	sp|Q4VAE3|TMM65_MOUSE	Tmem65	2	4	1300000	0.00776			sp|Q91VW5|GOGA4_MOUSE	Golga4	3	3	190000	0.000488			sp|P12815|PDCD6_MOUSE	Pdcd6	3	3	1300000	0.00501			sp|P70429|EVL_MOUSE	Evl	5	5	1500000	0.00287			sp|Q8CI61|BAG4_MOUSE	Bag4	5	5	570000	0.00132			sp|Q99JB2|STML2_MOUSE	Stoml2	4	4	630000	0.00202		sp|P28667|MRP_MOUSE	Marcksl1
	sp|Q9JJU8|SH3L1_MOUSE	Sh3bgrl	2	4	180000	0.00107			sp|Q9JJZ4|UB2J1_MOUSE	Ube2j1	3	3	300000	0.000764			sp|Q61644|PACN1_MOUSE	Pacsin1	3	3	240000	0.000939			sp|P09411|PGK1_MOUSE	Pgk1	5	5	1800000	0.00334			sp|Q8CHG3|GCC2_MOUSE	Gcc2	5	5	530000	0.00123			sp|Q3UYC0|PPM1H_MOUSE	Ppm1h	4	4	2000000	0.00625		sp|Q9CQX2|CYB5B_MOUSE	Cyb5b
	sp|Q9JJY3|NSMA2_MOUSE	Smpd3	2	4	460000	0.00269			sp|Q8BWG8|ARRB1_MOUSE	Arrb1	3	3	620000	0.00155			sp|Q7TQI3|OTUB1_MOUSE	Otub1	3	3	310000	0.00124			sp|Q99LI8|HGS_MOUSE	Hgs	5	5	1100000	0.00214			sp|Q99JB2|STML2_MOUSE	Stoml2	5	5	1000000	0.0024			sp|O08795|GLU2B_MOUSE	Prkcsh	4	4	2100000	0.00657		sp|P14231|AT1B2_MOUSE	Atp1b2
	sp|Q9WUK2|IF4H_MOUSE	Eif4h	2	4	3900000	0.0232			sp|O54984|ASNA_MOUSE	Asna1	3	3	390000	0.000968			sp|P36993|PPM1B_MOUSE	Ppm1b	3	3	320000	0.00125			sp|Q9D2G2|ODO2_MOUSE	Dlst	5	5	2000000	0.0038			sp|Q9DBL1|ACDSB_MOUSE	Acadsb	5	5	1200000	0.00272			sp|P48320|DCE2_MOUSE	Gad2	4	4	2000000	0.00646		sp|O70166|STMN3_MOUSE	Stmn3
	sp|P62858|RS28_MOUSE	Rps28	2	4	720000	0.00424			sp|Q9D1Q6|ERP44_MOUSE	Erp44	3	3	890000	0.00225			sp|P28571|SC6A9_MOUSE	Slc6a9	3	3	710000	0.00282			sp|Q8C080|SNX16_MOUSE	Snx16	5	5	1300000	0.00245			sp|Q9QYI3|DNJC7_MOUSE	Dnajc7	5	5	960000	0.00222			sp|O88643|PAK1_MOUSE	Pak1	4	4	750000	0.00239		sp|Q91VZ6|SMAP1_MOUSE	Smap1
	sp|Q9CQI6|COTL1_MOUSE	Cotl1	2	4	530000	0.00315			sp|Q63932|MP2K2_MOUSE	Map2k2	3	3	520000	0.0013			sp|Q9D1K7|CT027_MOUSE		3	3	690000	0.00275			sp|P24638|PPAL_MOUSE	Acp2	5	5	2000000	0.00388			sp|Q9Z1R2|BAG6_MOUSE	Bag6	5	5	880000	0.00202			sp|Q9Z1N5|DX39B_MOUSE	Ddx39b	4	4	1500000	0.00472		sp|P11438|LAMP1_MOUSE	Lamp1
	sp|P43406|ITAV_MOUSE	Itgav	2	3	220000	0.00128			sp|P68181|KAPCB_MOUSE	Prkacb	3	3	590000	0.00149			sp|Q91YJ2|SNX4_MOUSE	Snx4	3	3	250000	0.000981			sp|P35700|PRDX1_MOUSE	Prdx1	5	5	1900000	0.00359			sp|Q3UH93|PLXD1_MOUSE	Plxnd1	5	5	1100000	0.00254			sp|Q66JS6|EI3JB_MOUSE	Eif3j2	4	4	400000	0.00127		sp|Q9R013|CATF_MOUSE	Ctsf
	sp|O35609|SCAM3_MOUSE	Scamp3	2	3	1100000	0.00622			sp|Q6NZL0|SOGA3_MOUSE	Soga3	3	3	490000	0.00122			sp|Q9QZX7|SRR_MOUSE	Srr	3	3	360000	0.00142			sp|P35822|PTPRK_MOUSE	Ptprk	5	5	1600000	0.00295			sp|Q9R0Y5|KAD1_MOUSE	Ak1	5	5	1000000	0.00242			sp|P20444|KPCA_MOUSE	Prkca	4	4	590000	0.00189		tr|D3YZZ5|D3YZZ5_MOUSE	Tmed7
	sp|Q9DC51|GNAI3_MOUSE	Gnai3	2	3	460000	0.0027			sp|P36993|PPM1B_MOUSE	Ppm1b	3	3	550000	0.00138			sp|Q9DB60|PGFS_MOUSE	Fam213b	3	3	1100000	0.00424			sp|P32020|NLTP_MOUSE	Scp2	5	5	3600000	0.00681			sp|Q5RKR3|ISLR2_MOUSE	Islr2	5	5	700000	0.00161			sp|Q8VDQ8|SIR2_MOUSE	Sirt2	4	4	4500000	0.0143		sp|Q05816|FABP5_MOUSE	Fabp5
	sp|Q91WS0|CISD1_MOUSE	Cisd1	2	3	280000	0.00168			sp|Q8BYI8|F234B_MOUSE	Fam234b	3	3	830000	0.00207			sp|Q8VE62|PAIP1_MOUSE	Paip1	3	3	420000	0.00165			sp|P01831|THY1_MOUSE	Thy1	4	26	280000000	0.54			sp|P16125|LDHB_MOUSE	Ldhb	5	5	880000	0.00202			sp|Q99L47|F10A1_MOUSE	St13	4	4	15000000	0.0478		sp|P63040|CPLX1_MOUSE	Cplx1
	sp|Q8K221|ARFP2_MOUSE	Arfip2	2	3	310000	0.00183			sp|Q811Q9|PCY1B_MOUSE	Pcyt1b	3	3	790000	0.002			sp|Q3UMR5|MCU_MOUSE	Mcu	3	3	950000	0.00376			sp|P63044|VAMP2_MOUSE	Vamp2	4	25	570000000	1.08			sp|Q8BGT1|FLRT3_MOUSE	Flrt3	5	5	7200000	0.0166			sp|Q07076|ANXA7_MOUSE	Anxa7	4	4	2300000	0.0073		sp|P51880|FABP7_MOUSE	Fabp7
	sp|Q9Z2Q6|SEPT5_MOUSE	2017-09-05	2	3	180000	0.00109			sp|O88952|LIN7C_MOUSE	Lin7c	3	3	460000	0.00115			sp|P32921|SYWC_MOUSE	Wars	3	3	280000	0.00112			IGKC_MOUSE		4	24	190000000	0.37			sp|Q8VHH7|ADCY3_MOUSE	Adcy3	5	5	1100000	0.00248			sp|Q6PB44|PTN23_MOUSE	Ptpn23	4	4	490000	0.00156		sp|Q9D164|FXYD6_MOUSE	Fxyd6
	sp|P57722|PCBP3_MOUSE	Pcbp3	2	3	220000	0.00132			sp|Q61753|SERA_MOUSE	Phgdh	3	3	350000	0.000868			sp|Q80TL4|PHF24_MOUSE	Phf24	3	3	640000	0.00253			sp|Q9Z1W8|AT12A_MOUSE	Atp12a	4	19	260000000	0.5			sp|Q8VCS3|XYLK_MOUSE	Fam20b	5	5	2200000	0.00497			sp|Q61831|MK10_MOUSE	Mapk10	4	4	630000	0.00202		sp|P09671|SODM_MOUSE	Sod2
	sp|O09111|NDUBB_MOUSE	Ndufb11	2	3	91000	0.000536			tr|Q6P0A6|Q6P0A6_MOUSE	Pcdh10	3	3	360000	0.000905			sp|Q9CWS0|DDAH1_MOUSE	Ddah1	3	3	310000	0.00124			sp|E9PUL5|PRRT2_MOUSE	Prrt2	4	16	9800000	0.0186			sp|O09126|SEM4D_MOUSE	Sema4d	5	5	1100000	0.00247			sp|Q8BX94|OSBL2_MOUSE	Osbpl2	4	4	850000	0.00272		sp|Q9JJV2|PROF2_MOUSE	Pfn2
	sp|Q8BFT9|SVOP_MOUSE	Svop	2	3	380000	0.00224			sp|A2A699|F1712_MOUSE	Fam171a2	3	3	230000	0.000581			sp|Q9DBP5|KCY_MOUSE	Cmpk1	3	3	310000	0.00124			sp|Q69ZS6|SV2C_MOUSE	Sv2c	4	14	55000000	0.1			sp|A2A8L5|PTPRF_MOUSE	Ptprf	5	5	920000	0.00212			sp|Q920V1|B3GL1_MOUSE	B3galnt1	4	4	1000000	0.00322		sp|O70492|SNX3_MOUSE	Snx3
	sp|P14206|RSSA_MOUSE	Rpsa	2	3	550000	0.00328			sp|Q03517|SCG2_MOUSE	Scg2	3	3	440000	0.00111			sp|O35114|SCRB2_MOUSE	Scarb2	3	3	690000	0.00274			sp|P24668|MPRD_MOUSE	M6pr	4	11	11000000	0.0205			sp|P35293|RAB18_MOUSE	Rab18	5	5	3600000	0.00827			sp|P06745|G6PI_MOUSE	Gpi	4	4	740000	0.00238		sp|P61979|HNRPK_MOUSE	Hnrnpk
	sp|P97952|SCN1B_MOUSE	Scn1b	2	3	580000	0.00345			sp|Q9CWS0|DDAH1_MOUSE	Ddah1	3	3	410000	0.00102			sp|Q8BTG7|NDRG4_MOUSE	Ndrg4	3	3	1200000	0.00485			tr|Q6DFY2|Q6DFY2_MOUSE	Opcml	4	10	72000000	0.14			sp|Q8C3W1|CA198_MOUSE		5	5	1100000	0.0026			sp|Q99JX3|GORS2_MOUSE	Gorasp2	4	4	1900000	0.00598		sp|Q8R332|NUP58_MOUSE	Nup58
	sp|Q9D358|PPAC_MOUSE	Acp1	2	3	200000	0.00116			sp|Q9WU60|ATRN_MOUSE	Atrn	3	3	430000	0.00108			sp|O88844|IDHC_MOUSE	Idh1	3	3	370000	0.00149			sp|Q8HW98|IGLO5_MOUSE	Iglon5	4	9	6700000	0.0127			sp|Q01279|EGFR_MOUSE	Egfr	5	5	1400000	0.00315			sp|Q8BZ98|DYN3_MOUSE	Dnm3	4	4	1100000	0.00352		sp|P61082|UBC12_MOUSE	Ube2m
	sp|Q62419|SH3G1_MOUSE	Sh3gl1	2	3	1300000	0.00767			sp|P58389|PTPA_MOUSE	Ptpa	3	3	450000	0.00114			sp|Q9D1P4|CHRD1_MOUSE	Chordc1	3	3	470000	0.00186			sp|P18760|COF1_MOUSE	Cfl1	4	7	15000000	0.0283			sp|O35405|PLD3_MOUSE	Pld3	5	5	2500000	0.00587			sp|Q924N4|S12A6_MOUSE	Slc12a6	4	4	740000	0.00237		sp|Q99L43|CDS2_MOUSE	Cds2
	sp|Q8BYR5|CAPS2_MOUSE	Cadps2	2	3	210000	0.00126			sp|Q80X50|UBP2L_MOUSE	Ubap2l	3	3	540000	0.00135			sp|Q9CR16|PPID_MOUSE	Ppid	3	3	350000	0.00137			sp|Q80ZJ1|RAP2A_MOUSE	Rap2a	4	7	5400000	0.0103			sp|Q9D7A8|ARMC1_MOUSE	Armc1	5	5	1500000	0.00336			sp|P17751|TPIS_MOUSE	Tpi1	4	4	1300000	0.00415		sp|P56812|PDCD5_MOUSE	Pdcd5
	sp|Q3UX10|TBAL3_MOUSE	Tubal3	2	3	730000	0.00432			sp|Q9JHU2|PALMD_MOUSE	Palmd	3	3	380000	0.000957			sp|Q08122|TLE3_MOUSE	Tle3	3	3	270000	0.00105			sp|P84075|HPCA_MOUSE	Hpca	4	7	19000000	0.0362			sp|Q924N4|S12A6_MOUSE	Slc12a6	5	5	1600000	0.00379			sp|Q923S9|RAB30_MOUSE	Rab30	4	4	590000	0.0019		sp|Q9DC51|GNAI3_MOUSE	Gnai3
	sp|Q99JI6|RAP1B_MOUSE	Rap1b	2	3	860000	0.00511			sp|Q9CX00|IST1_MOUSE	Ist1	3	3	740000	0.00185			sp|Q9D6J6|NDUV2_MOUSE	Ndufv2	3	3	420000	0.00168			sp|P11438|LAMP1_MOUSE	Lamp1	4	7	12000000	0.0228			sp|Q9CYH2|F213A_MOUSE	Fam213a	5	5	1400000	0.00326			sp|Q6PCP5|MFF_MOUSE	Mff	4	4	780000	0.0025		sp|Q99JB2|STML2_MOUSE	Stoml2
	sp|Q8CI61|BAG4_MOUSE	Bag4	2	3	150000	0.000873			sp|Q9CR00|PSMD9_MOUSE	Psmd9	3	3	630000	0.00157			sp|Q80V26|IMPA3_MOUSE	Impad1	3	3	1000000	0.00399			tr|D3YZZ5|D3YZZ5_MOUSE	Tmed7	4	7	15000000	0.0293			sp|Q8BM72|HSP13_MOUSE	Hspa13	5	5	2800000	0.00638			sp|P61211|ARL1_MOUSE	Arl1	4	4	2000000	0.00641		sp|Q8VDP6|CDIPT_MOUSE	Cdipt
	sp|Q07813|BAX_MOUSE	Bax	2	3	1100000	0.00633			sp|O35393|EFNB3_MOUSE	Efnb3	3	3	330000	0.000819			sp|Q9Z0M5|LICH_MOUSE	Lipa	3	3	380000	0.00149			sp|P68510|1433F_MOUSE	Ywhah	4	7	4800000	0.00906			sp|Q91VD9|NDUS1_MOUSE	Ndufs1	5	5	980000	0.00226			sp|Q9D1C8|VPS28_MOUSE	Vps28	4	4	1000000	0.00328		sp|P49443|PPM1A_MOUSE	Ppm1a
	sp|Q99K10|NLGN1_MOUSE	Nlgn1	2	3	2500000	0.0148			sp|Q9D1C8|VPS28_MOUSE	Vps28	3	3	850000	0.00213			sp|O88737|BSN_MOUSE	Bsn	3	3	200000	0.000797			sp|Q7TNR6|IGS21_MOUSE	Igsf21	4	7	1600000	0.00297			sp|Q9DCW4|ETFB_MOUSE	Etfb	5	5	1400000	0.00314			sp|Q99JH7|CSTN3_MOUSE	Clstn3	4	4	650000	0.00207		sp|P17047|LAMP2_MOUSE	Lamp2
	sp|P62996|TRA2B_MOUSE	Tra2b	2	3	100000	0.000604			sp|Q8BIJ6|SYIM_MOUSE	Iars2	3	3	410000	0.00103			sp|Q9JLB0|MPP6_MOUSE	Mpp6	3	3	280000	0.00109			sp|P56564|EAA1_MOUSE	Slc1a3	4	6	3900000	0.00734			sp|Q6PDM2|SRSF1_MOUSE	Srsf1	5	5	1500000	0.00343			sp|Q9CYH2|F213A_MOUSE	Fam213a	4	4	1000000	0.00324		sp|O70480|VAMP4_MOUSE	Vamp4
	sp|Q80V26|IMPA3_MOUSE	Impad1	2	3	760000	0.00447			sp|P32020|NLTP_MOUSE	Scp2	3	3	2200000	0.00548			sp|P62869|ELOB_MOUSE	Elob	3	3	510000	0.002			sp|Q8BL86|MBLC2_MOUSE	Mblac2	4	6	5100000	0.00974			sp|Q99JY9|ARP3_MOUSE	Actr3	5	5	2700000	0.00628			sp|P47809|MP2K4_MOUSE	Map2k4	4	4	1700000	0.00537		sp|Q62420|SH3G2_MOUSE	Sh3gl2
	sp|O08539|BIN1_MOUSE	Bin1	2	3	250000	0.0015			sp|Q8BGT1|FLRT3_MOUSE	Flrt3	3	3	9100000	0.0228			sp|O88587|COMT_MOUSE	Comt	3	3	140000	0.000571			sp|P47754|CAZA2_MOUSE	Capza2	4	6	3200000	0.00603			sp|Q59J78|MIMIT_MOUSE	Ndufaf2	5	5	1700000	0.00387			sp|Q6PHS9|CA2D2_MOUSE	Cacna2d2	4	4	3700000	0.0118		sp|Q9CYN9|RENR_MOUSE	Atp6ap2
	sp|Q8R2Y8|PTH2_MOUSE	Ptrh2	2	3	220000	0.00133			sp|Q7TSJ2|MAP6_MOUSE	Map6	3	3	280000	0.000693			sp|Q61699|HS105_MOUSE	Hsph1	3	3	240000	0.000936			sp|P46414|CDN1B_MOUSE	Cdkn1b	4	6	1400000	0.00261			sp|Q91YT0|NDUV1_MOUSE	Ndufv1	5	5	720000	0.00165			sp|P60755|MDGA2_MOUSE	Mdga2	4	4	520000	0.00166		sp|O35114|SCRB2_MOUSE	Scarb2
	sp|Q9JL56|GDE1_MOUSE	Gde1	2	3	530000	0.00312			sp|Q99L13|3HIDH_MOUSE	Hibadh	3	3	240000	0.00061			sp|P80560|PTPR2_MOUSE	Ptprn2	3	3	230000	0.000899			sp|P97765|WBP2_MOUSE	Wbp2	4	6	2600000	0.00495			sp|Q9DBS1|TMM43_MOUSE	Tmem43	5	5	3300000	0.00772			sp|Q80WQ2|VAC14_MOUSE	Vac14	4	4	300000	0.000957		sp|Q62523|ZYX_MOUSE	Zyx
	sp|P01867|IGG2B_MOUSE	Igh-3	2	3	360000	0.00215			sp|Q8VCS3|XYLK_MOUSE	Fam20b	3	3	380000	0.000964			sp|O08807|PRDX4_MOUSE	Prdx4	3	3	480000	0.00191			sp|P35279|RAB6A_MOUSE	Rab6a	4	6	6500000	0.0124			sp|P63044|VAMP2_MOUSE	Vamp2	4	18	320000000	0.75			sp|Q91WS0|CISD1_MOUSE	Cisd1	4	4	1700000	0.0053		sp|P56564|EAA1_MOUSE	Slc1a3
	sp|O88447|KLC1_MOUSE	Klc1	2	3	210000	0.00126			sp|Q9WUM5|SUCA_MOUSE	Suclg1	3	3	410000	0.00102			sp|P60755|MDGA2_MOUSE	Mdga2	3	3	190000	0.000768			sp|O35114|SCRB2_MOUSE	Scarb2	4	6	4700000	0.00897			sp|Q9JKD3|SCAM5_MOUSE	Scamp5	4	17	110000000	0.26			sp|Q3U1F9|PHAG1_MOUSE	Pag1	4	4	1900000	0.00608		sp|Q8JZM4|DNER_MOUSE	Dner
	sp|O88712|CTBP1_MOUSE	Ctbp1	2	3	280000	0.00165			sp|Q9Z0M5|LICH_MOUSE	Lipa	3	3	630000	0.00159			sp|P60904|DNJC5_MOUSE	Dnajc5	3	3	1900000	0.00768			sp|Q9Z1N5|DX39B_MOUSE	Ddx39b	4	5	2200000	0.00427			sp|O70456|1433S_MOUSE	Sfn	4	16	97000000	0.22			sp|P70168|IMB1_MOUSE	Kpnb1	4	4	870000	0.00277		sp|Q8VDQ8|SIR2_MOUSE	Sirt2
	sp|P23506|PIMT_MOUSE	Pcmt1	2	3	530000	0.00313			sp|P35235|PTN11_MOUSE	Ptpn11	3	3	280000	0.000707			sp|Q7TSK3|PCDH8_MOUSE	Pcdh8	3	3	180000	0.000716			sp|Q8K221|ARFP2_MOUSE	Arfip2	4	5	3400000	0.00646			sp|E9PUL5|PRRT2_MOUSE	Prrt2	4	15	10000000	0.0231			sp|P68404|KPCB_MOUSE	Prkcb	4	4	820000	0.00262		sp|Q3UDR8|YIPF3_MOUSE	Yipf3
	sp|Q8CHS8|VP37A_MOUSE	Vps37a	2	3	120000	0.000714			sp|Q08331|CALB2_MOUSE	Calb2	3	3	1700000	0.0042			sp|Q9JJU8|SH3L1_MOUSE	Sh3bgrl	3	3	280000	0.0011			sp|Q921M7|FA49B_MOUSE	Fam49b	4	5	2300000	0.0043			sp|Q9WV27|AT1A4_MOUSE	Atp1a4	4	14	100000000	0.24			sp|P23818|GRIA1_MOUSE	Gria1	4	4	430000	0.00137		sp|P61087|UBE2K_MOUSE	Ube2k
	sp|Q99KU0|VMP1_MOUSE	Vmp1	2	3	76000	0.00045			sp|Q01279|EGFR_MOUSE	Egfr	3	3	420000	0.00106			sp|Q8CBH5|MFSD6_MOUSE	Mfsd6	3	3	280000	0.0011			sp|Q8VE33|GD1L1_MOUSE	Gdap1l1	4	5	2000000	0.00388			sp|Q9Z1W8|AT12A_MOUSE	Atp12a	4	14	98000000	0.23			tr|A2RSX9|A2RSX9_MOUSE	Arfip1	4	4	830000	0.00266		sp|Q9DBL1|ACDSB_MOUSE	Acadsb
	sp|Q9WV69|DEMA_MOUSE	Dmtn	2	3	220000	0.00131			sp|Q7TNR6|IGS21_MOUSE	Igsf21	3	3	1000000	0.00256			sp|Q8BFY6|PEF1_MOUSE	Pef1	3	3	520000	0.00208			sp|Q8BKG3|PTK7_MOUSE	Ptk7	4	5	980000	0.00187			sp|P18760|COF1_MOUSE	Cfl1	4	10	21000000	0.0478			sp|Q7TQI3|OTUB1_MOUSE	Otub1	4	4	570000	0.00181		sp|Q99JX3|GORS2_MOUSE	Gorasp2
	sp|Q63912|OMGP_MOUSE	Omg	2	3	230000	0.00136			sp|Q9D0E3|LYSM1_MOUSE	Lysmd1	3	3	380000	0.000945			sp|Q9CPW0|CNTP2_MOUSE	Cntnap2	3	3	430000	0.0017			tr|E9Q137|E9Q137_MOUSE	Tex264	4	5	590000	0.00112			sp|P24668|MPRD_MOUSE	M6pr	4	10	8900000	0.0205			sp|Q8VEM8|MPCP_MOUSE	Slc25a3	4	4	4800000	0.0153		sp|Q8K3C3|LZIC_MOUSE	Lzic
	sp|Q99KV1|DJB11_MOUSE	Dnajb11	2	3	170000	0.000997			tr|Q0VGU4|Q0VGU4_MOUSE	Vgf	3	3	690000	0.00173			sp|Q9CY50|SSRA_MOUSE	Ssr1	3	3	270000	0.00106			sp|Q62420|SH3G2_MOUSE	Sh3gl2	4	5	2600000	0.00499			sp|P14231|AT1B2_MOUSE	Atp1b2	4	10	31000000	0.0704			sp|P62627|DLRB1_MOUSE	Dynlrb1	4	4	2500000	0.00792		sp|O08539|BIN1_MOUSE	Bin1
	sp|O35678|MGLL_MOUSE	Mgll	2	3	200000	0.00118			sp|Q9CYH2|F213A_MOUSE	Fam213a	3	3	810000	0.00204			sp|Q8BJU0|SGTA_MOUSE	Sgta	3	3	590000	0.00236			sp|Q6ZQI3|MLEC_MOUSE	Mlec	4	5	3400000	0.00645			sp|P36536|SAR1A_MOUSE	Sar1a	4	9	13000000	0.0296			sp|Q06890|CLUS_MOUSE	Clu	4	4	760000	0.00243		sp|Q791V5|MTCH2_MOUSE	Mtch2
	sp|Q9D074|MGRN1_MOUSE	Mgrn1	2	3	160000	0.00094			sp|Q3UMR5|MCU_MOUSE	Mcu	3	3	1600000	0.00404			sp|O35188|X3CL1_MOUSE	Cx3cl1	3	3	2700000	0.0105			sp|Q05816|FABP5_MOUSE	Fabp5	4	5	7500000	0.0142			sp|P53994|RAB2A_MOUSE	Rab2a	4	9	39000000	0.0905			sp|Q3UHD6|SNX27_MOUSE	Snx27	4	4	1000000	0.00323		sp|P24638|PPAL_MOUSE	Acp2
	sp|P50153|GBG4_MOUSE	Gng4	2	3	1600000	0.00917			sp|P06745|G6PI_MOUSE	Gpi	3	3	650000	0.00163			sp|Q9D8N0|EF1G_MOUSE	Eef1g	3	3	330000	0.00131			sp|Q6PDM2|SRSF1_MOUSE	Srsf1	4	5	2600000	0.00495			sp|Q64433|CH10_MOUSE	Hspe1	4	9	28000000	0.0656			sp|P12815|PDCD6_MOUSE	Pdcd6	4	4	1300000	0.00426		sp|Q6KAU4|MB12B_MOUSE	Mvb12b
	sp|Q4VAA2|CDV3_MOUSE	Cdv3	2	3	160000	0.000963			sp|Q6NS82|RETR2_MOUSE	Retreg2	3	3	570000	0.00144			sp|Q8BIJ6|SYIM_MOUSE	Iars2	3	3	260000	0.00102			sp|Q62048|PEA15_MOUSE	Pea15	4	5	1000000	0.00198			sp|Q8HW98|IGLO5_MOUSE	Iglon5	4	8	4000000	0.00913			sp|Q8BL66|EEA1_MOUSE	Eea1	4	4	580000	0.00185		sp|Q9WTX5|SKP1_MOUSE	Skp1
	tr|D3YZZ5|D3YZZ5_MOUSE	Tmed7	2	3	270000	0.00158			sp|Q4VAE3|TMM65_MOUSE	Tmem65	3	3	2400000	0.0061			sp|Q8R1V4|TMED4_MOUSE	Tmed4	3	3	590000	0.00234			sp|P70296|PEBP1_MOUSE	Pebp1	4	5	7800000	0.0149			tr|Q6DFY2|Q6DFY2_MOUSE	Opcml	4	8	37000000	0.0856			sp|Q9DB73|NB5R1_MOUSE	Cyb5r1	4	4	680000	0.00218		tr|E9Q137|E9Q137_MOUSE	Tex264
	tr|Q4VA93|Q4VA93_MOUSE	Prkca	2	3	240000	0.00139			sp|A2APX8|SCN1A_MOUSE	Scn1a	3	3	660000	0.00165			sp|Q9CVB6|ARPC2_MOUSE	Arpc2	3	3	370000	0.00146			tr|Q0VBD0|Q0VBD0_MOUSE	Itgb8	4	5	800000	0.00151			sp|P68510|1433F_MOUSE	Ywhah	4	8	6000000	0.0138			sp|O88712|CTBP1_MOUSE	Ctbp1	4	4	2900000	0.00934		sp|P59999|ARPC4_MOUSE	Arpc4
	sp|O54984|ASNA_MOUSE	Asna1	2	3	180000	0.00109			sp|Q3UH93|PLXD1_MOUSE	Plxnd1	3	3	340000	0.000853			sp|P15116|CADH2_MOUSE	Cdh2	3	3	400000	0.00158			sp|Q9R1J0|NSDHL_MOUSE	Nsdhl	4	5	4800000	0.00919			sp|B1AXV0|FRS1L_MOUSE	Frrs1l	4	8	790000	0.00182			sp|Q8BGR6|ARL15_MOUSE	Arl15	4	4	1100000	0.00337		sp|Q91VU0|FAM3C_MOUSE	Fam3c
	sp|Q6PGH2|JUPI2_MOUSE	Jpt2	2	3	300000	0.00175			sp|Q61739|ITA6_MOUSE	Itga6	3	3	330000	0.000832			sp|P84086|CPLX2_MOUSE	Cplx2	2	19	1200000	0.00469			sp|P52800|EFNB2_MOUSE	Efnb2	4	5	600000	0.00114			sp|O70166|STMN3_MOUSE	Stmn3	4	8	5000000	0.0116			sp|Q8K009|AL1L2_MOUSE	Aldh1l2	4	4	670000	0.00213		sp|Q8CI61|BAG4_MOUSE	Bag4
	sp|P07724|ALBU_MOUSE	Alb	2	3	260000	0.00155			sp|P28738|KIF5C_MOUSE	Kif5c	3	3	300000	0.000752			sp|P62737|ACTA_MOUSE	Acta2	2	12	23000000	0.0912			sp|P10637|TAU_MOUSE	Mapt	4	5	4400000	0.00842			sp|Q8BLQ9|CADM2_MOUSE	Cadm2	4	8	20000000	0.0451			sp|P15116|CADH2_MOUSE	Cdh2	4	4	1500000	0.00491		sp|O09126|SEM4D_MOUSE	Sema4d
	sp|Q9CWK8|SNX2_MOUSE	Snx2	2	3	7200000	0.0424			sp|A2A8L5|PTPRF_MOUSE	Ptprf	3	3	330000	0.000829			sp|Q61789|LAMA3_MOUSE	Lama3	2	9	2200000	0.00866			sp|P97441|ZNT3_MOUSE	Slc30a3	4	5	2000000	0.00374			sp|Q9WTT4|VATG2_MOUSE	Atp6v1g2	4	7	9200000	0.0213			sp|P09055|ITB1_MOUSE	Itgb1	4	4	3000000	0.00956		sp|Q9D2G2|ODO2_MOUSE	Dlst
	sp|Q8VE62|PAIP1_MOUSE	Paip1	2	3	400000	0.00239			sp|Q9CY50|SSRA_MOUSE	Ssr1	3	3	590000	0.00149			sp|Q3V3I2|GNAT3_MOUSE	Gnat3	2	8	38000000	0.15			sp|P70404|IDHG1_MOUSE	Idh3g	4	4	2000000	0.00374			sp|O70480|VAMP4_MOUSE	Vamp4	4	7	4800000	0.0111			sp|Q9WUM5|SUCA_MOUSE	Suclg1	4	4	710000	0.00226		sp|P20108|PRDX3_MOUSE	Prdx3
	sp|Q8C0E2|VP26B_MOUSE	Vps26b	2	3	210000	0.00124			sp|Q8K4R4|PITC1_MOUSE	Pitpnc1	3	3	400000	0.00102			sp|O55100|SNG1_MOUSE	Syngr1	2	7	4400000	0.0175			sp|O35643|AP1B1_MOUSE	Ap1b1	4	4	1600000	0.00306			sp|P08752|GNAI2_MOUSE	Gnai2	4	7	11000000	0.0257			sp|Q3TDN2|FAF2_MOUSE	Faf2	4	4	630000	0.00203		sp|O88712|CTBP1_MOUSE	Ctbp1
	sp|P68404|KPCB_MOUSE	Prkcb	2	3	190000	0.00111			sp|Q9CXW3|CYBP_MOUSE	Cacybp	3	3	700000	0.00177			tr|E9QB01|E9QB01_MOUSE	Ncam1	2	6	7200000	0.0285			sp|P97333|NRP1_MOUSE	Nrp1	4	4	1100000	0.00201			tr|D3YZZ5|D3YZZ5_MOUSE	Tmed7	4	7	16000000	0.0374			sp|O35685|NUDC_MOUSE	Nudc	4	4	1100000	0.00339		sp|O70493|SNX12_MOUSE	Snx12
	sp|Q78T54|VMA21_MOUSE	Vma21	2	3	510000	0.003			sp|O88307|SORL_MOUSE	Sorl1	3	3	410000	0.00104			sp|Q9D3D9|ATPD_MOUSE	Atp5d	2	6	3700000	0.0145			sp|O08547|SC22B_MOUSE	Sec22b	4	4	2300000	0.00444			sp|Q9DC51|GNAI3_MOUSE	Gnai3	4	6	1800000	0.0042			tr|B1AWN6|B1AWN6_MOUSE	Scn2a	4	4	970000	0.00309		sp|Q91Z38|TTC1_MOUSE	Ttc1
	sp|Q8K2P7|S38A1_MOUSE	Slc38a1	2	3	180000	0.00106			sp|P62869|ELOB_MOUSE	Elob	3	3	610000	0.00153			tr|G5E8R2|G5E8R2_MOUSE	Tpm1	2	6	700000	0.00279			tr|A2AUK8|A2AUK8_MOUSE	Epb41l1	4	4	1300000	0.00244			sp|Q8R4C2|RUFY2_MOUSE	Rufy2	4	6	11000000	0.0248			sp|Q8BKG3|PTK7_MOUSE	Ptk7	4	4	660000	0.00211		sp|Q9Z1Z2|STRAP_MOUSE	Strap
	IGHG3_MOUSE		2	3	140000	0.000818			sp|Q6IR34|GPSM1_MOUSE	Gpsm1	3	3	340000	0.00085			sp|P26883|FKB1A_MOUSE	Fkbp1a	2	5	6400000	0.0255			sp|P56812|PDCD5_MOUSE	Pdcd5	4	4	2700000	0.00508			sp|P55821|STMN2_MOUSE	Stmn2	4	6	9700000	0.0225			sp|O88844|IDHC_MOUSE	Idh1	4	4	590000	0.00189		sp|Q7TQI3|OTUB1_MOUSE	Otub1
	sp|O08807|PRDX4_MOUSE	Prdx4	2	3	710000	0.00418			sp|Q9D1P4|CHRD1_MOUSE	Chordc1	3	3	560000	0.0014			sp|Q71FD5|ZNRF2_MOUSE	Znrf2	2	5	890000	0.00354			sp|Q9D164|FXYD6_MOUSE	Fxyd6	4	4	1800000	0.00347			sp|P09671|SODM_MOUSE	Sod2	4	6	5900000	0.0137			sp|Q8BWT1|THIM_MOUSE	Acaa2	4	4	780000	0.00249		sp|O35678|MGLL_MOUSE	Mgll
	sp|Q6PA06|ATLA2_MOUSE	Atl2	2	3	140000	0.000829			sp|P52480|KPYM_MOUSE	Pkm	3	3	490000	0.00124			sp|Q62159|RHOC_MOUSE	Rhoc	2	5	7300000	0.0291			sp|Q07813|BAX_MOUSE	Bax	4	4	1100000	0.00218			sp|Q9D7N9|APMAP_MOUSE	Apmap	4	6	2400000	0.00548			sp|Q9R0Q6|ARC1A_MOUSE	Arpc1a	4	4	1300000	0.00418		sp|Q7TME0|PLPR4_MOUSE	Plppr4
	sp|Q66JS6|EI3JB_MOUSE	Eif3j2	2	3	240000	0.00141			sp|P31938|MP2K1_MOUSE	Map2k1	3	3	580000	0.00147			sp|Q01768|NDKB_MOUSE	Nme2	2	5	2200000	0.00862			sp|Q9CX34|SGT1_MOUSE	Sugt1	4	4	1500000	0.00278			sp|Q80ZJ1|RAP2A_MOUSE	Rap2a	4	6	3500000	0.00802			sp|Q8VDW0|DX39A_MOUSE	Ddx39a	4	4	1800000	0.00586		sp|Q80TL4|PHF24_MOUSE	Phf24
	sp|Q9WVA4|TAGL2_MOUSE	Tagln2	2	3	64000	0.000381			sp|Q61941|NNTM_MOUSE	Nnt	3	3	460000	0.00115			sp|Q9WUC3|LY6H_MOUSE	Ly6h	2	4	250000	0.000974			sp|Q9CPQ3|TOM22_MOUSE	Tomm22	4	4	1400000	0.00266			sp|Q9JJV2|PROF2_MOUSE	Pfn2	4	6	3700000	0.00863			sp|P41216|ACSL1_MOUSE	Acsl1	4	4	610000	0.00194		sp|Q9CR16|PPID_MOUSE	Ppid
	sp|Q6P6J9|TXD15_MOUSE	Txndc15	2	3	370000	0.00219			sp|Q8CAA7|PGM2L_MOUSE	Pgm2l1	3	3	330000	0.00082			sp|P62342|SELT_MOUSE	Selenot	2	4	460000	0.00183			sp|P20357|MTAP2_MOUSE	Map2	4	4	460000	0.000868			sp|P35279|RAB6A_MOUSE	Rab6a	4	6	5100000	0.0118			sp|Q9QZ23|NFU1_MOUSE	Nfu1	4	4	1100000	0.00359		sp|Q9DCW4|ETFB_MOUSE	Etfb
	sp|P63042|STMN4_MOUSE	Stmn4	2	3	1400000	0.00827			sp|P62737|ACTA_MOUSE	Acta2	2	15	31000000	0.0769			sp|O88456|CPNS1_MOUSE	Capns1	2	4	370000	0.00147			sp|Q91WC3|ACSL6_MOUSE	Acsl6	4	4	620000	0.00117			sp|Q9CZY3|UB2V1_MOUSE	Ube2v1	4	6	62000000	0.14			sp|O54984|ASNA_MOUSE	Asna1	4	4	990000	0.00315		sp|P14206|RSSA_MOUSE	Rpsa
	sp|Q9CVB6|ARPC2_MOUSE	Arpc2	2	3	260000	0.00154			sp|E9PUL5|PRRT2_MOUSE	Prrt2	2	13	4000000	0.01			sp|O35682|MYADM_MOUSE	Myadm	2	4	470000	0.00187			sp|O35737|HNRH1_MOUSE	Hnrnph1	4	4	1700000	0.0032			sp|Q9JIP4|PANX1_MOUSE	Panx1	4	6	1300000	0.00311			sp|Q811D0|DLG1_MOUSE	Dlg1	4	4	860000	0.00274		sp|Q920V1|B3GL1_MOUSE	B3galnt1
	sp|Q6P5F7|TTYH3_MOUSE	Ttyh3	2	3	360000	0.00215			sp|P84086|CPLX2_MOUSE	Cplx2	2	10	660000	0.00165			sp|Q91X58|ZFN2B_MOUSE	Zfand2b	2	4	210000	0.000846			sp|Q9JLM8|DCLK1_MOUSE	Dclk1	4	4	1100000	0.00204			sp|P62331|ARF6_MOUSE	Arf6	4	6	3700000	0.00861			sp|Q8BTG7|NDRG4_MOUSE	Ndrg4	4	4	2800000	0.00881		sp|Q99KV1|DJB11_MOUSE	Dnajb11
	sp|O88746|TOM1_MOUSE	Tom1	2	2	100000	0.000618			sp|Q61789|LAMA3_MOUSE	Lama3	2	8	3500000	0.00872			sp|Q8VEK0|CC50A_MOUSE	Tmem30a	2	4	600000	0.00238			sp|Q6PCP5|MFF_MOUSE	Mff	4	4	1200000	0.00233			sp|O35188|X3CL1_MOUSE	Cx3cl1	4	6	4400000	0.0101			sp|Q8BR92|PALM2_MOUSE	Palm2	4	4	1400000	0.00431		sp|Q8BGR6|ARL15_MOUSE	Arl15
	tr|Q3TN93|Q3TN93_MOUSE	Ubqln1	2	2	66000	0.000389			sp|P63024|VAMP3_MOUSE	Vamp3	2	7	69000000	0.17			sp|Q9D593|VATE2_MOUSE	Atp6v1e2	2	4	1200000	0.00458			sp|Q8R332|NUP58_MOUSE	Nup58	4	4	2300000	0.00431			sp|Q91VZ6|SMAP1_MOUSE	Smap1	4	6	7400000	0.017			sp|Q9D379|HYEP_MOUSE	Ephx1	4	4	850000	0.00272		sp|Q91W90|TXND5_MOUSE	Txndc5
	sp|P48758|CBR1_MOUSE	Cbr1	2	2	90000	0.000534			sp|P17879|HS71B_MOUSE	Hspa1b	2	7	44000000	0.11			sp|P48771|CX7A2_MOUSE	Cox7a2	2	4	1800000	0.00707			sp|Q9D880|TIM50_MOUSE	Timm50	4	4	1100000	0.00212			sp|Q3UHK1|MYCT_MOUSE	Slc2a13	4	6	1800000	0.00418			sp|Q9DBP5|KCY_MOUSE	Cmpk1	4	4	460000	0.00146		sp|Q99LC3|NDUAA_MOUSE	Ndufa10
	tr|A0A1W2P882|A0A1W2P882_MOUSE	Atp2b1	2	2	270000	0.00159			sp|Q9D3D9|ATPD_MOUSE	Atp5d	2	7	8400000	0.0212			tr|G3X8R0|G3X8R0_MOUSE	Reep5	2	4	1000000	0.00399			sp|P35293|RAB18_MOUSE	Rab18	4	4	3000000	0.00574			sp|P70296|PEBP1_MOUSE	Pebp1	4	6	5300000	0.0123			sp|Q61187|TS101_MOUSE	Tsg101	4	4	1200000	0.0037		sp|O09111|NDUBB_MOUSE	Ndufb11
	sp|Q0KL01|UBX2B_MOUSE	Ubxn2b	2	2	62000	0.000364			sp|O55100|SNG1_MOUSE	Syngr1	2	6	8100000	0.0203			sp|Q9WVA4|TAGL2_MOUSE	Tagln2	2	4	410000	0.00164			sp|Q3UMR5|MCU_MOUSE	Mcu	4	4	1300000	0.00256			sp|Q8R332|NUP58_MOUSE	Nup58	4	5	2900000	0.00675			sp|P59999|ARPC4_MOUSE	Arpc4	4	4	1600000	0.00521		sp|Q9DAU1|CNPY3_MOUSE	Cnpy3
	sp|Q9R1T4|SEPT6_MOUSE	2017-09-06	2	2	56000	0.000328			sp|O09044|SNP23_MOUSE	Snap23	2	6	1500000	0.00374			sp|Q9WUZ9|ENTP5_MOUSE	Entpd5	2	3	74000	0.000294			sp|O70251|EF1B_MOUSE	Eef1b	4	4	2000000	0.00388			sp|P35822|PTPRK_MOUSE	Ptprk	4	5	1100000	0.00262			sp|Q01279|EGFR_MOUSE	Egfr	4	4	870000	0.00277		sp|Q05186|RCN1_MOUSE	Rcn1
	sp|P40124|CAP1_MOUSE	Cap1	2	2	120000	0.000721			sp|Q9Z1W8|AT12A_MOUSE	Atp12a	2	6	74000000	0.19			sp|Q9CRA5|GOLP3_MOUSE	Golph3	2	3	900000	0.00357			sp|Q8BGH7|C42S2_MOUSE	Cdc42se2	4	4	1000000	0.00191			sp|Q9WV80|SNX1_MOUSE	Snx1	4	5	800000	0.00184			sp|P97441|ZNT3_MOUSE	Slc30a3	4	4	700000	0.00223		sp|P70349|HINT1_MOUSE	Hint1
	sp|Q9D7X3|DUS3_MOUSE	Dusp3	2	2	140000	0.000822			sp|P26883|FKB1A_MOUSE	Fkbp1a	2	5	11000000	0.0276			sp|Q9QZI8|SERC1_MOUSE	Serinc1	2	3	480000	0.00192			sp|Q9CZU6|CISY_MOUSE	Cs	4	4	2200000	0.0041			sp|Q920E5|FPPS_MOUSE	Fdps	4	5	1400000	0.0033			sp|Q91VD9|NDUS1_MOUSE	Ndufs1	4	4	760000	0.00243		sp|O88696|CLPP_MOUSE	Clpp
	sp|Q9D8B3|CHM4B_MOUSE	Chmp4b	2	2	100000	0.00059			tr|G5E8R2|G5E8R2_MOUSE	Tpm1	2	5	1100000	0.00284			sp|P45591|COF2_MOUSE	Cfl2	2	3	4500000	0.018			sp|Q9WV92|E41L3_MOUSE	Epb41l3	4	4	800000	0.00153			sp|P56812|PDCD5_MOUSE	Pdcd5	4	5	4500000	0.0104			sp|Q9DBJ1|PGAM1_MOUSE	Pgam1	4	4	1900000	0.0062		sp|P30416|FKBP4_MOUSE	Fkbp4
	sp|P97798|NEO1_MOUSE	Neo1	2	2	74000	0.00044			sp|P68040|RACK1_MOUSE	Rack1	2	5	840000	0.00212			tr|A0A140T8J4|A0A140T8J4_MOUSE	Hebp1	2	3	2500000	0.00982			sp|Q71M36|CSPG5_MOUSE	Cspg5	4	4	1100000	0.0021			sp|Q64010|CRK_MOUSE	Crk	4	5	670000	0.00154			sp|Q9EPR5|SORC2_MOUSE	Sorcs2	4	4	320000	0.00102		sp|Q91YP2|NEUL_MOUSE	Nln
	sp|Q9DCS9|NDUBA_MOUSE	Ndufb10	2	2	160000	0.000939			sp|Q9WUC3|LY6H_MOUSE	Ly6h	2	4	330000	0.000826			sp|P97952|SCN1B_MOUSE	Scn1b	2	3	1200000	0.00457			sp|Q9QYS2|GRM3_MOUSE	Grm3	4	4	1100000	0.00216			sp|Q99L43|CDS2_MOUSE	Cds2	4	5	8200000	0.0189			tr|A2MY50|A2MY50_MOUSE		3	23	450000000	1.44		sp|P17751|TPIS_MOUSE	Tpi1
	sp|P52800|EFNB2_MOUSE	Efnb2	2	2	180000	0.00108			sp|Q99LC3|NDUAA_MOUSE	Ndufa10	2	4	360000	0.000896			sp|P35279|RAB6A_MOUSE	Rab6a	2	3	610000	0.00243			sp|Q8VIM9|IRGQ_MOUSE	Irgq	4	4	720000	0.00137			sp|O35607|BMPR2_MOUSE	Bmpr2	4	5	1200000	0.00269			sp|Q9D6P8|CALL3_MOUSE	Calml3	3	21	5100000	0.0161		sp|Q9Z0X1|AIFM1_MOUSE	Aifm1
	sp|P45591|COF2_MOUSE	Cfl2	2	2	3000000	0.0176			sp|P62342|SELT_MOUSE	Selenot	2	4	260000	0.000643			sp|Q99L13|3HIDH_MOUSE	Hibadh	2	3	140000	0.000546			sp|Q9EPR4|S23A2_MOUSE	Slc23a2	4	4	750000	0.00142			sp|Q9WUM5|SUCA_MOUSE	Suclg1	4	5	1300000	0.00305			sp|O55100|SNG1_MOUSE	Syngr1	3	20	110000000	0.36		sp|P62869|ELOB_MOUSE	Elob
	sp|Q01853|TERA_MOUSE	Vcp	2	2	140000	0.000847			sp|P35951|LDLR_MOUSE	Ldlr	2	4	350000	0.000882			sp|Q60715|P4HA1_MOUSE	P4ha1	2	3	150000	0.000603			sp|Q8VEM8|MPCP_MOUSE	Slc25a3	4	4	3200000	0.00602			sp|Q9CQ22|LTOR1_MOUSE	Lamtor1	4	5	1900000	0.00445			sp|Q91ZZ3|SYUB_MOUSE	Sncb	3	19	380000000	1.21		sp|Q99K10|NLGN1_MOUSE	Nlgn1
	sp|Q91VW5|GOGA4_MOUSE	Golga4	2	2	80000	0.00047			tr|Q3TN93|Q3TN93_MOUSE	Ubqln1	2	4	540000	0.00137			sp|P63028|TCTP_MOUSE	Tpt1	2	3	490000	0.00195			sp|O88447|KLC1_MOUSE	Klc1	4	4	720000	0.00137			sp|Q9ERE7|MESD_MOUSE	Mesdc2	4	5	2200000	0.0051			sp|P17156|HSP72_MOUSE	Hspa2	3	17	76000000	0.24		sp|Q6PGF7|EXOC8_MOUSE	Exoc8
	sp|B0V2N1|PTPRS_MOUSE	Ptprs	2	2	140000	0.000805			tr|A0A0A6YY91|A0A0A6YY91_MOUSE	Ncam1	2	4	2900000	0.00728			sp|P56380|AP4A_MOUSE	Nudt2	2	3	370000	0.00149			sp|P68181|KAPCB_MOUSE	Prkacb	4	4	1100000	0.00216			sp|Q61831|MK10_MOUSE	Mapk10	4	5	610000	0.0014			sp|Q9JKD3|SCAM5_MOUSE	Scamp5	3	14	62000000	0.2		sp|Q8BGH7|C42S2_MOUSE	Cdc42se2
	sp|Q9WTP7|KAD3_MOUSE	Ak3	2	2	90000	0.00053			sp|P56399|UBP5_MOUSE	Usp5	2	4	270000	0.000691			sp|Q9Z2Q6|SEPT5_MOUSE	2017-09-05	2	3	520000	0.00205			sp|O70252|HMOX2_MOUSE	Hmox2	4	4	1300000	0.00256			sp|P59017|B2L13_MOUSE	Bcl2l13	4	5	2100000	0.00481			tr|E9QB01|E9QB01_MOUSE	Ncam1	3	11	15000000	0.0474		sp|Q8BHH2|RAB9B_MOUSE	Rab9b
	sp|Q9D2G2|ODO2_MOUSE	Dlst	2	2	160000	0.000948			sp|Q60605|MYL6_MOUSE	Myl6	2	4	240000	0.000616			sp|P15209|NTRK2_MOUSE	Ntrk2	2	3	490000	0.00195			sp|Q923S9|RAB30_MOUSE	Rab30	4	4	1100000	0.00215			sp|Q71FD5|ZNRF2_MOUSE	Znrf2	4	5	1700000	0.00396			sp|P19536|COX5B_MOUSE	Cox5b	3	8	7300000	0.0232		sp|Q9QYJ0|DNJA2_MOUSE	Dnaja2
	sp|P11798|KCC2A_MOUSE	Camk2a	2	2	140000	0.00081			sp|P63213|GBG2_MOUSE	Gng2	2	4	41000000	0.1			sp|Q91WS0|CISD1_MOUSE	Cisd1	2	3	1100000	0.00423			sp|Q9Z0L0|TPBG_MOUSE	Tpbg	4	4	1100000	0.00207			sp|Q8BHK2|SCN3B_MOUSE	Scn3b	4	5	2600000	0.00594			tr|Q8C7C3|Q8C7C3_MOUSE	Tpm3	3	7	2600000	0.00818		sp|P47941|CRKL_MOUSE	Crkl
	sp|Q61644|PACN1_MOUSE	Pacsin1	2	2	150000	0.000913			sp|Q91W97|HKDC1_MOUSE	Hkdc1	2	4	5600000	0.014			sp|O88441|MTX2_MOUSE	Mtx2	2	3	130000	0.000531			sp|Q62443|NPTX1_MOUSE	Nptx1	4	4	1200000	0.0023			sp|Q8BTG7|NDRG4_MOUSE	Ndrg4	4	5	3300000	0.00756			sp|Q8R5J9|PRAF3_MOUSE	Arl6ip5	3	7	3400000	0.0109		sp|Q9CZ42|NNRD_MOUSE	Naxd
	sp|Q9CYZ2|TPD54_MOUSE	Tpd52l2	2	2	200000	0.00118			sp|Q99JI4|PSMD6_MOUSE	Psmd6	2	4	470000	0.00118			sp|P17879|HS71B_MOUSE	Hspa1b	2	3	12000000	0.0463			sp|Q8CFE4|SCYL2_MOUSE	Scyl2	4	4	1500000	0.0029			sp|Q9JMB8|CNTN6_MOUSE	Cntn6	4	5	1100000	0.00258			sp|O35682|MYADM_MOUSE	Myadm	3	7	1900000	0.00602		sp|Q64455|PTPRJ_MOUSE	Ptprj
	sp|Q9QXT0|CNPY2_MOUSE	Cnpy2	2	2	430000	0.00252			sp|P15920|VPP2_MOUSE	Atp6v0a2	2	4	4200000	0.0105			tr|Q8BXB3|Q8BXB3_MOUSE	Slc8a1	2	3	470000	0.00186			sp|Q62318|TIF1B_MOUSE	Trim28	4	4	620000	0.00118			sp|P11438|LAMP1_MOUSE	Lamp1	4	5	7800000	0.0181			tr|Q6P1J1|Q6P1J1_MOUSE	Crmp1	3	6	11000000	0.0355		sp|Q9WUL7|ARL3_MOUSE	Arl3
	sp|P20108|PRDX3_MOUSE	Prdx3	2	2	450000	0.00265			sp|P04370|MBP_MOUSE	Mbp	2	3	1100000	0.00285			sp|O88696|CLPP_MOUSE	Clpp	2	3	300000	0.0012			sp|A2TJV2|PALM3_MOUSE	Palm3	4	4	1000000	0.0019			sp|Q07076|ANXA7_MOUSE	Anxa7	4	5	3000000	0.00685			tr|E0CYM8|E0CYM8_MOUSE	Sirpa	3	6	10000000	0.033		sp|P58389|PTPA_MOUSE	Ptpa
	sp|Q3U2P1|SC24A_MOUSE	Sec24a	2	2	54000	0.000319			tr|A0A1W2P882|A0A1W2P882_MOUSE	Atp2b1	2	3	1800000	0.00464			sp|Q3UX10|TBAL3_MOUSE	Tubal3	2	3	1500000	0.00597			sp|Q9CYH2|F213A_MOUSE	Fam213a	4	4	1500000	0.00289			sp|Q9JLM8|DCLK1_MOUSE	Dclk1	4	5	730000	0.00169			sp|Q9D3D9|ATPD_MOUSE	Atp5d	3	6	4700000	0.015		sp|Q3UEB3|PUF60_MOUSE	Puf60
	sp|Q8BIW1|PRUN1_MOUSE	Prune1	2	2	80000	0.000474			sp|P10833|RRAS_MOUSE	Rras	2	3	1500000	0.00381			tr|Q8C845|Q8C845_MOUSE	Efhd2	2	3	2200000	0.00854			sp|Q8VDP6|CDIPT_MOUSE	Cdipt	4	4	3000000	0.00571			sp|Q91V12|BACH_MOUSE	Acot7	4	5	2700000	0.00615			sp|P70296|PEBP1_MOUSE	Pebp1	3	6	9400000	0.0301		sp|Q61644|PACN1_MOUSE	Pacsin1
	sp|Q60629|EPHA5_MOUSE	Epha5	2	2	95000	0.000561			tr|A0A0R4J1Z7|A0A0R4J1Z7_MOUSE	Sirpa	2	3	10000000	0.0258			tr|Q6PD36|Q6PD36_MOUSE	Nptxr	2	3	1100000	0.00416			sp|Q99JY9|ARP3_MOUSE	Actr3	4	4	2600000	0.00499			sp|Q8BVQ5|PPME1_MOUSE	Ppme1	4	5	1500000	0.00349			tr|Q6PGJ3|Q6PGJ3_MOUSE	L1cam	3	5	13000000	0.0421		sp|Q8K386|RAB15_MOUSE	Rab15
	sp|Q8BXN9|TM87A_MOUSE	Tmem87a	2	2	81000	0.000481			sp|P46414|CDN1B_MOUSE	Cdkn1b	2	3	710000	0.00179			sp|Q7TSK2|SEZ6_MOUSE	Sez6	2	3	440000	0.00173			sp|Q8BHK2|SCN3B_MOUSE	Scn3b	4	4	1300000	0.00246			sp|Q9JHU2|PALMD_MOUSE	Palmd	4	5	970000	0.00225			sp|P61982|1433G_MOUSE	Ywhag	3	5	11000000	0.0365		sp|Q9DC11|PXDC2_MOUSE	Plxdc2
	sp|P50427|STS_MOUSE	Sts	2	2	100000	0.000596			tr|A0A0A6YWR2|A0A0A6YWR2_MOUSE	Ighg1	2	3	4000000	0.0101			sp|Q9QXT0|CNPY2_MOUSE	Cnpy2	2	3	1500000	0.00602			tr|B2RXT3|B2RXT3_MOUSE	Ogdhl	4	4	820000	0.00157			sp|Q9CR95|NECP1_MOUSE	Necap1	4	5	5800000	0.0135			sp|Q8R4C2|RUFY2_MOUSE	Rufy2	3	5	4000000	0.0126		sp|Q99MN9|PCCB_MOUSE	Pccb
	sp|Q61753|SERA_MOUSE	Phgdh	2	2	110000	0.000624			sp|O35127|C10_MOUSE	Grcc10	2	3	330000	0.00084			sp|P05532|KIT_MOUSE	Kit	2	3	85000	0.000336			sp|P35585|AP1M1_MOUSE	Ap1m1	4	4	1500000	0.00293			sp|Q62159|RHOC_MOUSE	Rhoc	4	5	11000000	0.0245			tr|Q14BH8|Q14BH8_MOUSE	Cacna2d1	3	5	5500000	0.0176		sp|Q99L13|3HIDH_MOUSE	Hibadh
	sp|Q9D0F3|LMAN1_MOUSE	Lman1	2	2	80000	0.000472			sp|P45591|COF2_MOUSE	Cfl2	2	3	7900000	0.0199			sp|Q8CHG3|GCC2_MOUSE	Gcc2	2	3	220000	0.000857			sp|P30275|KCRU_MOUSE	Ckmt1	4	4	1800000	0.00337			sp|Q811D0|DLG1_MOUSE	Dlg1	4	5	980000	0.00225			sp|Q9D3L0|F174A_MOUSE	Fam174a	3	5	450000	0.00143		sp|P47809|MP2K4_MOUSE	Map2k4
	sp|P61961|UFM1_MOUSE	Ufm1	2	2	320000	0.00187			sp|Q9D2G2|ODO2_MOUSE	Dlst	2	3	420000	0.00105			sp|Q80X50|UBP2L_MOUSE	Ubap2l	2	3	390000	0.00156			sp|Q9CX00|IST1_MOUSE	Ist1	4	4	860000	0.00163			sp|Q7TNR6|IGS21_MOUSE	Igsf21	4	5	1400000	0.00319			sp|P70404|IDHG1_MOUSE	Idh3g	3	4	1900000	0.00608		sp|Q9QXV0|PCSK1_MOUSE	Pcsk1n
	sp|Q3U7U3|FBX7_MOUSE	Fbxo7	2	2	46000	0.000273			sp|Q9WUK2|IF4H_MOUSE	Eif4h	2	3	7200000	0.0181			sp|P08228|SODC_MOUSE	Sod1	2	3	550000	0.0022			sp|Q9CR95|NECP1_MOUSE	Necap1	4	4	4700000	0.00886			sp|P24638|PPAL_MOUSE	Acp2	4	5	2500000	0.00576			sp|P52875|TM165_MOUSE	Tmem165	3	4	2600000	0.00828		sp|Q8BNU0|ARMC6_MOUSE	Armc6
	sp|Q921H8|THIKA_MOUSE	Acaa1a	2	2	130000	0.000792			sp|Q8R4S0|PP14C_MOUSE	Ppp1r14c	2	3	2000000	0.00491			sp|P61082|UBC12_MOUSE	Ube2m	2	3	2500000	0.00997			sp|P97950|RB33A_MOUSE	Rab33a	4	4	2100000	0.00403			sp|Q6PCX7|RGMA_MOUSE	Rgma	4	4	1700000	0.00403			sp|Q8C996|TM163_MOUSE	Tmem163	3	4	1900000	0.00615		sp|Q9JMB8|CNTN6_MOUSE	Cntn6
	sp|P52795|EFNB1_MOUSE	Efnb1	2	2	96000	0.000567			tr|B7ZNF6|B7ZNF6_MOUSE	Ctnnd2	2	3	810000	0.00203			sp|P97447|FHL1_MOUSE	Fhl1	2	3	370000	0.00145			sp|Q05909|PTPRG_MOUSE	Ptprg	4	4	1400000	0.00265			sp|Q01405|SC23A_MOUSE	Sec23a	4	4	620000	0.00143			sp|Q5M8N0|CNRP1_MOUSE	Cnrip1	3	4	1400000	0.00433		sp|Q05909|PTPRG_MOUSE	Ptprg
	sp|P57746|VATD_MOUSE	Atp6v1d	2	2	170000	0.000997			sp|O88531|PPT1_MOUSE	Ppt1	2	3	6200000	0.0157			sp|Q9QUI0|RHOA_MOUSE	Rhoa	2	3	400000	0.00157			tr|Q80U83|Q80U83_MOUSE	Sec24c	4	4	1100000	0.00204			sp|Q921E2|RAB31_MOUSE	Rab31	4	4	1300000	0.0031			sp|Q9D6J6|NDUV2_MOUSE	Ndufv2	3	4	640000	0.00204		sp|Q8VHH7|ADCY3_MOUSE	Adcy3
	sp|P17183|ENOG_MOUSE	Eno2	2	2	40000	0.000239			sp|P55821|STMN2_MOUSE	Stmn2	2	3	2700000	0.00684			sp|P58774|TPM2_MOUSE	Tpm2	2	3	2600000	0.0104			sp|Q61831|MK10_MOUSE	Mapk10	4	4	530000	0.001			sp|P61979|HNRPK_MOUSE	Hnrnpk	4	4	1300000	0.00298			sp|P56812|PDCD5_MOUSE	Pdcd5	3	4	4500000	0.0143		sp|P35235|PTN11_MOUSE	Ptpn11
	sp|Q62108|DLG4_MOUSE	Dlg4	2	2	160000	0.000934			sp|Q9CWE0|MFR1L_MOUSE	Mtfr1l	2	3	200000	0.000503			sp|Q62442|VAMP1_MOUSE	Vamp1	2	3	610000	0.00242			sp|P56371|RAB4A_MOUSE	Rab4a	4	4	3100000	0.00583			sp|O70251|EF1B_MOUSE	Eef1b	4	4	2200000	0.00499			tr|Q3UTP0|Q3UTP0_MOUSE	Pcdh17	3	4	740000	0.00235		sp|Q8BUV8|GP107_MOUSE	Gpr107
	sp|P48320|DCE2_MOUSE	Gad2	2	2	150000	0.000858			sp|P12023|A4_MOUSE	App	2	3	390000	0.000979			sp|Q9WUK2|IF4H_MOUSE	Eif4h	2	3	3500000	0.0137			sp|O70591|PFD2_MOUSE	Pfdn2	4	4	1900000	0.00355			sp|O08547|SC22B_MOUSE	Sec22b	4	4	1800000	0.00414			sp|P35279|RAB6A_MOUSE	Rab6a	3	4	4500000	0.0143		sp|Q8R555|CRAC1_MOUSE	Crtac1
	sp|P31938|MP2K1_MOUSE	Map2k1	2	2	96000	0.000566			sp|Q9DB15|RM12_MOUSE	Mrpl12	2	3	1400000	0.0034			sp|Q60648|SAP3_MOUSE	Gm2a	2	3	1500000	0.00589			sp|P49446|PTPRE_MOUSE	Ptpre	4	4	660000	0.00125			sp|Q99KJ8|DCTN2_MOUSE	Dctn2	4	4	940000	0.00217			sp|Q8BGH7|C42S2_MOUSE	Cdc42se2	3	4	530000	0.00169		sp|Q9CQ45|NENF_MOUSE	Nenf
	sp|Q80XR2|AT2C1_MOUSE	Atp2c1	2	2	80000	0.000476			sp|Q80VP1|EPN1_MOUSE	Epn1	2	3	940000	0.00237			sp|Q91W97|HKDC1_MOUSE	Hkdc1	2	3	2400000	0.00955			sp|P62627|DLRB1_MOUSE	Dynlrb1	4	4	2800000	0.0054			sp|Q9D880|TIM50_MOUSE	Timm50	4	4	1100000	0.00246			sp|O88441|MTX2_MOUSE	Mtx2	3	4	720000	0.00229		sp|Q59J78|MIMIT_MOUSE	Ndufaf2
	sp|Q920E5|FPPS_MOUSE	Fdps	2	2	190000	0.0011			sp|P56380|AP4A_MOUSE	Nudt2	2	3	270000	0.000683			sp|P04370|MBP_MOUSE	Mbp	2	2	390000	0.00153			sp|Q9Z110|P5CS_MOUSE	Aldh18a1	4	4	1200000	0.00225			sp|Q921M7|FA49B_MOUSE	Fam49b	4	4	1500000	0.00337			sp|P46414|CDN1B_MOUSE	Cdkn1b	3	4	450000	0.00142		sp|Q8BIQ5|CSTF2_MOUSE	Cstf2
	sp|Q8BRF7|SCFD1_MOUSE	Scfd1	2	2	76000	0.000448			tr|Q6PD36|Q6PD36_MOUSE	Nptxr	2	3	3000000	0.00754			sp|Q9DCT8|CRIP2_MOUSE	Crip2	2	2	810000	0.00322			sp|Q06890|CLUS_MOUSE	Clu	4	4	1000000	0.00199			sp|P41216|ACSL1_MOUSE	Acsl1	4	4	630000	0.00145			sp|Q8BHH2|RAB9B_MOUSE	Rab9b	3	4	1600000	0.00511		sp|P58771|TPM1_MOUSE	Tpm1
	sp|Q8JZW4|CPNE5_MOUSE	Cpne5	2	2	91000	0.000541			sp|P48771|CX7A2_MOUSE	Cox7a2	2	3	2200000	0.00563			sp|P10833|RRAS_MOUSE	Rras	2	2	490000	0.00196			sp|P48962|ADT1_MOUSE	Slc25a4	4	4	1800000	0.0034			sp|P23818|GRIA1_MOUSE	Gria1	4	4	1700000	0.00402			sp|Q9D3A9|TTYH1_MOUSE	Ttyh1	3	4	2800000	0.00889		sp|P48962|ADT1_MOUSE	Slc25a4
	sp|Q9R1K9|CETN2_MOUSE	Cetn2	2	2	77000	0.000452			sp|Q9JMB8|CNTN6_MOUSE	Cntn6	2	3	180000	0.000461			sp|P57722|PCBP3_MOUSE	Pcbp3	2	2	230000	0.000921			sp|Q9QY76|VAPB_MOUSE	Vapb	4	4	2000000	0.00389			sp|P05064|ALDOA_MOUSE	Aldoa	4	4	1700000	0.00399			sp|Q9QYG0|NDRG2_MOUSE	Ndrg2	3	4	520000	0.00168		sp|Q61166|MARE1_MOUSE	Mapre1
	sp|Q8VCM8|NCLN_MOUSE	Ncln	2	2	100000	0.000589			sp|Q9D1M0|SEC13_MOUSE	Sec13	2	3	380000	0.000945			tr|A0A1W2P882|A0A1W2P882_MOUSE	Atp2b1	2	2	550000	0.00217			sp|Q6WVG3|KCD12_MOUSE	Kctd12	4	4	1200000	0.00222			sp|Q923S9|RAB30_MOUSE	Rab30	4	4	910000	0.00209			sp|Q9JK48|SHLB1_MOUSE	Sh3glb1	3	4	3700000	0.0119		sp|Q921E2|RAB31_MOUSE	Rab31
	sp|Q9CZC8|SCRN1_MOUSE	Scrn1	2	2	89000	0.000528			sp|Q9CQR2|RS21_MOUSE	Rps21	2	3	530000	0.00134			tr|Q3TN93|Q3TN93_MOUSE	Ubqln1	2	2	160000	0.000621			sp|Q9QYJ0|DNJA2_MOUSE	Dnaja2	4	4	1100000	0.00215			sp|Q8BHH2|RAB9B_MOUSE	Rab9b	4	4	1800000	0.00412			sp|Q99LC3|NDUAA_MOUSE	Ndufa10	3	4	480000	0.00154		sp|P97333|NRP1_MOUSE	Nrp1
	sp|Q9EPR4|S23A2_MOUSE	Slc23a2	2	2	65000	0.000386			sp|O09126|SEM4D_MOUSE	Sema4d	2	3	430000	0.00108			sp|A2ALU4|SHRM2_MOUSE	Shroom2	2	2	150000	0.000579			sp|P47738|ALDH2_MOUSE	Aldh2	4	4	880000	0.00168			sp|Q9CQN1|TRAP1_MOUSE	Trap1	4	4	1300000	0.00293			sp|P48771|CX7A2_MOUSE	Cox7a2	3	4	2400000	0.00758		sp|Q9CRD0|OCAD1_MOUSE	Ociad1
	sp|Q9QYJ0|DNJA2_MOUSE	Dnaja2	2	2	79000	0.000464			sp|P61087|UBE2K_MOUSE	Ube2k	2	3	970000	0.00245			tr|Q3TML0|Q3TML0_MOUSE	Pdia6	2	2	1300000	0.0053			sp|Q9D7A8|ARMC1_MOUSE	Armc1	4	4	1000000	0.00195			sp|Q99LC3|NDUAA_MOUSE	Ndufa10	4	4	1100000	0.00245			sp|Q6P5E6|GGA2_MOUSE	Gga2	3	4	290000	0.000925		sp|P17439|GLCM_MOUSE	Gba
	sp|O88485|DC1I1_MOUSE	Dync1i1	2	2	110000	0.000664			sp|Q148V7|K1468_MOUSE	Kiaa1468	2	3	110000	0.000281			sp|Q80VP1|EPN1_MOUSE	Epn1	2	2	310000	0.00122			sp|Q6P6J9|TXD15_MOUSE	Txndc15	4	4	1500000	0.0029			sp|O54865|GCYB1_MOUSE	Gucy1b3	4	4	890000	0.00206			sp|Q9D2G2|ODO2_MOUSE	Dlst	3	4	520000	0.00166		sp|Q9R1V6|ADA22_MOUSE	Adam22
	tr|D3YWT1|D3YWT1_MOUSE	Hnrnph3	2	2	110000	0.00063			sp|Q8BH58|TIPRL_MOUSE	Tiprl	2	3	300000	0.000753			sp|Q63932|MP2K2_MOUSE	Map2k2	2	2	240000	0.00094			sp|Q9WUM5|SUCA_MOUSE	Suclg1	4	4	1500000	0.00287			sp|Q8VIM9|IRGQ_MOUSE	Irgq	4	4	630000	0.00146			sp|Q62419|SH3G1_MOUSE	Sh3gl1	3	4	1700000	0.00539		sp|Q9Z0L0|TPBG_MOUSE	Tpbg
	sp|P27546|MAP4_MOUSE	Map4	2	2	130000	0.000767			sp|Q9CYN9|RENR_MOUSE	Atp6ap2	2	3	1400000	0.00342			sp|Q62420|SH3G2_MOUSE	Sh3gl2	2	2	930000	0.00371			sp|Q91VD9|NDUS1_MOUSE	Ndufs1	4	4	790000	0.0015			sp|Q91ZA3|PCCA_MOUSE	Pcca	4	4	530000	0.00123			sp|Q9JIP4|PANX1_MOUSE	Panx1	3	4	940000	0.003		sp|P28738|KIF5C_MOUSE	Kif5c
	sp|Q8BNU0|ARMC6_MOUSE	Armc6	2	2	260000	0.00153			sp|Q9ERR1|NDEL1_MOUSE	Ndel1	2	3	250000	0.000625			tr|A0A0A6YWR2|A0A0A6YWR2_MOUSE	Ighg1	2	2	1200000	0.00484			sp|Q9WV80|SNX1_MOUSE	Snx1	4	4	760000	0.00145			sp|P48320|DCE2_MOUSE	Gad2	4	4	1700000	0.00395			sp|Q9D1Q6|ERP44_MOUSE	Erp44	3	4	1200000	0.00377		sp|Q8BLN5|ERG7_MOUSE	Lss
	sp|P61759|PFD3_MOUSE	Vbp1	2	2	100000	0.000608			sp|Q64373|B2CL1_MOUSE	Bcl2l1	2	3	290000	0.00073			sp|Q8C996|TM163_MOUSE	Tmem163	2	2	210000	0.000847			sp|Q61809|LRRN1_MOUSE	Lrrn1	4	4	710000	0.00134			sp|Q920V1|B3GL1_MOUSE	B3galnt1	4	4	1400000	0.00326			sp|Q62523|ZYX_MOUSE	Zyx	3	4	530000	0.0017		sp|P70663|SPRL1_MOUSE	Sparcl1
	sp|P56399|UBP5_MOUSE	Usp5	2	2	120000	0.000693			sp|P70349|HINT1_MOUSE	Hint1	2	3	6600000	0.0166			sp|O88746|TOM1_MOUSE	Tom1	2	2	130000	0.000527			sp|Q00623|APOA1_MOUSE	Apoa1	4	4	1800000	0.00334			sp|Q99JH7|CSTN3_MOUSE	Clstn3	4	4	970000	0.00224			tr|A0A0A6YY91|A0A0A6YY91_MOUSE	Ncam1	3	4	1900000	0.00607		sp|Q8BIW1|PRUN1_MOUSE	Prune1
	sp|Q99LP6|GRPE1_MOUSE	Grpel1	2	2	200000	0.00118			sp|P08228|SODC_MOUSE	Sod1	2	3	980000	0.00246			tr|A0A0R4J1Z7|A0A0R4J1Z7_MOUSE	Sirpa	2	2	3600000	0.0144			sp|Q99LX0|PARK7_MOUSE	Park7	4	4	1600000	0.0031			sp|O88696|CLPP_MOUSE	Clpp	4	4	1100000	0.00248			sp|P61750|ARF4_MOUSE	Arf4	3	4	2200000	0.00692		sp|O35393|EFNB3_MOUSE	Efnb3
	sp|Q9DCT2|NDUS3_MOUSE	Ndufs3	2	2	110000	0.000626			sp|O08638|MYH11_MOUSE	Myh11	2	3	670000	0.00168			sp|P49769|PSN1_MOUSE	Psen1	2	2	180000	0.000727			sp|Q99LP6|GRPE1_MOUSE	Grpel1	4	4	1700000	0.00314			sp|Q9Z1N5|DX39B_MOUSE	Ddx39b	4	4	1300000	0.00294			sp|P29533|VCAM1_MOUSE	Vcam1	3	4	2000000	0.00649		sp|Q9Z2W9|GRIA3_MOUSE	Gria3
	sp|Q3UJP5|CH037_MOUSE		2	2	140000	0.000802			sp|Q7TNP2|2AAB_MOUSE	Ppp2r1b	2	3	510000	0.00129			sp|Q5M8N0|CNRP1_MOUSE	Cnrip1	2	2	760000	0.00302			sp|Q9CQA3|SDHB_MOUSE	Sdhb	4	4	2200000	0.00425			sp|Q8C7E9|CSTFT_MOUSE	Cstf2t	4	4	580000	0.00133			sp|P49443|PPM1A_MOUSE	Ppm1a	3	4	2700000	0.00875		sp|Q6NZL0|SOGA3_MOUSE	Soga3
	sp|Q8VE99|CC115_MOUSE	Ccdc115	2	2	140000	0.000811			sp|Q69ZS6|SV2C_MOUSE	Sv2c	2	3	660000	0.00167			sp|Q8R366|IGSF8_MOUSE	Igsf8	2	2	270000	0.00108			sp|Q62523|ZYX_MOUSE	Zyx	4	4	1000000	0.00197			sp|Q99K10|NLGN1_MOUSE	Nlgn1	4	4	1000000	0.0024			sp|Q9R0P5|DEST_MOUSE	Dstn	3	4	1700000	0.00541		sp|Q8BVI5|STX16_MOUSE	Stx16
	sp|Q60605|MYL6_MOUSE	Myl6	2	2	92000	0.000544			sp|P56818|BACE1_MOUSE	Bace1	2	3	600000	0.0015			sp|O35737|HNRH1_MOUSE	Hnrnph1	2	2	510000	0.00203			sp|Q9CVB6|ARPC2_MOUSE	Arpc2	4	4	1100000	0.00217			sp|Q91YP2|NEUL_MOUSE	Nln	4	4	560000	0.00129			sp|Q6PGE7|SC6A7_MOUSE	Slc6a7	3	3	850000	0.00272		sp|Q9WVQ1|MAGI2_MOUSE	Magi2
	sp|Q8BIJ6|SYIM_MOUSE	Iars2	2	2	89000	0.000525			sp|P70404|IDHG1_MOUSE	Idh3g	2	2	240000	0.000607			sp|Q99K10|NLGN1_MOUSE	Nlgn1	2	2	97000	0.000386			tr|A2MY50|A2MY50_MOUSE		3	27	720000000	1.37			sp|Q8C1B7|SEP11_MOUSE	2017-09-11	4	4	510000	0.00118			sp|Q01405|SC23A_MOUSE	Sec23a	3	3	370000	0.00118		sp|Q11011|PSA_MOUSE	Npepps
	sp|Q9QXY6|EHD3_MOUSE	Ehd3	2	2	200000	0.00118			sp|Q9DCT8|CRIP2_MOUSE	Crip2	2	2	1800000	0.00445			sp|Q3UPH1|PRRC1_MOUSE	Prrc1	2	2	360000	0.00143			sp|O55100|SNG1_MOUSE	Syngr1	3	20	310000000	0.59			sp|Q9WU60|ATRN_MOUSE	Atrn	4	4	1200000	0.00269			tr|Q8BXB3|Q8BXB3_MOUSE	Slc8a1	3	3	1100000	0.0034		sp|Q922D8|C1TC_MOUSE	Mthfd1
	sp|Q91W90|TXND5_MOUSE	Txndc5	2	2	190000	0.00111			tr|G5E8G3|G5E8G3_MOUSE	Opcml	2	2	1200000	0.00299			sp|Q8BKC5|IPO5_MOUSE	Ipo5	2	2	150000	0.000579			sp|Q9JKD3|SCAM5_MOUSE	Scamp5	3	17	170000000	0.32			sp|Q9QZ06|TOLIP_MOUSE	Tollip	4	4	1100000	0.00251			sp|Q8R105|VP37C_MOUSE	Vps37c	3	3	750000	0.00241		sp|P05201|AATC_MOUSE	Got1
	sp|Q8VDD5|MYH9_MOUSE	Myh9	2	2	62000	0.000368			sp|Q8VE88|F1142_MOUSE	Fam114a2	2	2	310000	0.000781			sp|Q9CYZ2|TPD54_MOUSE	Tpd52l2	2	2	300000	0.00118			sp|Q91ZZ3|SYUB_MOUSE	Sncb	3	16	270000000	0.51			sp|P20444|KPCA_MOUSE	Prkca	4	4	620000	0.00144			sp|P54754|EPHB3_MOUSE	Ephb3	3	3	210000	0.000655		sp|Q9QZX7|SRR_MOUSE	Srr
	sp|Q64010|CRK_MOUSE	Crk	2	2	140000	0.000829			sp|Q02248|CTNB1_MOUSE	Ctnnb1	2	2	140000	0.00034			tr|E9Q137|E9Q137_MOUSE	Tex264	2	2	180000	0.000723			sp|Q9QZI8|SERC1_MOUSE	Serinc1	3	15	7400000	0.014			sp|P10630|IF4A2_MOUSE	Eif4a2	4	4	1000000	0.00234			sp|P81117|NUCB2_MOUSE	Nucb2	3	3	400000	0.00129		sp|Q810C1|SLIK1_MOUSE	Slitrk1
	sp|Q3UHD6|SNX27_MOUSE	Snx27	2	2	150000	0.000877			sp|P57722|PCBP3_MOUSE	Pcbp3	2	2	410000	0.00103			sp|Q6RHR9|MAGI1_MOUSE	Magi1	2	2	110000	0.000422			tr|E9QB01|E9QB01_MOUSE	Ncam1	3	12	86000000	0.16			sp|Q8CHU3|EPN2_MOUSE	Epn2	4	4	510000	0.00118			sp|P63330|PP2AA_MOUSE	Ppp2ca	3	3	710000	0.00228		sp|P49446|PTPRE_MOUSE	Ptpre
	sp|P80317|TCPZ_MOUSE	Cct6a	2	2	60000	0.000353			sp|P97333|NRP1_MOUSE	Nrp1	2	2	230000	0.000579			sp|Q8R2Y8|PTH2_MOUSE	Ptrh2	2	2	290000	0.00116			sp|Q91VZ6|SMAP1_MOUSE	Smap1	3	10	7900000	0.0151			sp|Q6PB44|PTN23_MOUSE	Ptpn23	4	4	410000	0.000938			sp|Q78JW9|UBFD1_MOUSE	Ubfd1	3	3	860000	0.00274		sp|Q80SW1|SAHH2_MOUSE	Ahcyl1
	sp|Q6NVF0|OCRL_MOUSE	Ocrl	2	2	100000	0.000595			sp|Q8R366|IGSF8_MOUSE	Igsf8	2	2	760000	0.00191			sp|P48758|CBR1_MOUSE	Cbr1	2	2	300000	0.00121			tr|E0CYM8|E0CYM8_MOUSE	Sirpa	3	9	27000000	0.0517			sp|P63216|GBG3_MOUSE	Gng3	4	4	1600000	0.00365			sp|P05064|ALDOA_MOUSE	Aldoa	3	3	850000	0.0027		sp|P62071|RRAS2_MOUSE	Rras2
	sp|Q71M36|CSPG5_MOUSE	Cspg5	2	2	130000	0.000753			sp|P97952|SCN1B_MOUSE	Scn1b	2	2	1500000	0.00372			tr|Q3UWL8|Q3UWL8_MOUSE	Pfdn4	2	2	160000	0.000621			sp|O70456|1433S_MOUSE	Sfn	3	9	83000000	0.16			sp|P35951|LDLR_MOUSE	Ldlr	4	4	590000	0.00136			sp|Q9WU60|ATRN_MOUSE	Atrn	3	3	490000	0.00157		sp|Q61330|CNTN2_MOUSE	Cntn2
	sp|Q9Z0L0|TPBG_MOUSE	Tpbg	2	2	72000	0.000424			sp|Q8BYR5|CAPS2_MOUSE	Cadps2	2	2	670000	0.00169			sp|Q9WTP7|KAD3_MOUSE	Ak3	2	2	120000	0.000491			IGH1M_MOUSE	Ighg1	3	9	29000000	0.0555			sp|Q8K3C3|LZIC_MOUSE	Lzic	4	4	730000	0.00168			sp|Q64010|CRK_MOUSE	Crk	3	3	440000	0.00141		sp|Q9QYS2|GRM3_MOUSE	Grm3
	sp|P12815|PDCD6_MOUSE	Pdcd6	2	2	320000	0.00187			sp|Q8C1B7|SEP11_MOUSE	2017-09-11	2	2	200000	0.000498			sp|P63216|GBG3_MOUSE	Gng3	2	2	280000	0.00111			sp|Q3V3I2|GNAT3_MOUSE	Gnat3	3	9	140000000	0.26			sp|Q921H8|THIKA_MOUSE	Acaa1a	4	4	1100000	0.00245			sp|Q9CQZ1|HSBP1_MOUSE	Hsbp1	3	3	550000	0.00174		sp|Q9CWS0|DDAH1_MOUSE	Ddah1
	sp|Q68FL4|SAHH3_MOUSE	Ahcyl2	2	2	140000	0.000825			sp|Q5M8N0|CNRP1_MOUSE	Cnrip1	2	2	1100000	0.00287			sp|P47738|ALDH2_MOUSE	Aldh2	2	2	670000	0.00265			tr|Q6PGJ3|Q6PGJ3_MOUSE	L1cam	3	7	42000000	0.0793			sp|Q9QXT0|CNPY2_MOUSE	Cnpy2	4	4	1800000	0.00406			sp|O35737|HNRH1_MOUSE	Hnrnph1	3	3	640000	0.00203		sp|Q80Z38|SHAN2_MOUSE	Shank2
	sp|Q9JJN6|CNBP1_MOUSE	Ctnnbip1	2	2	120000	0.000735			sp|Q9D7E4|CS025_MOUSE		2	2	380000	0.000953			sp|Q9R0D8|WDR54_MOUSE	Wdr54	2	2	260000	0.00105			sp|P09671|SODM_MOUSE	Sod2	3	7	6700000	0.0127			sp|P47738|ALDH2_MOUSE	Aldh2	4	4	960000	0.00222			sp|O88746|TOM1_MOUSE	Tom1	3	3	380000	0.0012		sp|Q8C525|M21D2_MOUSE	Mb21d2
	sp|Q91YP2|NEUL_MOUSE	Nln	2	2	120000	0.000724			sp|O88456|CPNS1_MOUSE	Capns1	2	2	190000	0.000468			sp|Q8BNU0|ARMC6_MOUSE	Armc6	2	2	490000	0.00193			sp|P36536|SAR1A_MOUSE	Sar1a	3	7	11000000	0.0205			sp|Q80VP1|EPN1_MOUSE	Epn1	4	4	750000	0.00172			sp|O09111|NDUBB_MOUSE	Ndufb11	3	3	410000	0.00132		sp|Q9JKC6|CEND_MOUSE	Cend1
	sp|O88809|DCX_MOUSE	Dcx	2	2	180000	0.00106			sp|Q9CRA5|GOLP3_MOUSE	Golph3	2	2	610000	0.00153			tr|A2ANP1|A2ANP1_MOUSE	Fam219a	2	2	410000	0.00164			sp|O88441|MTX2_MOUSE	Mtx2	3	7	800000	0.00152			sp|Q91WC3|ACSL6_MOUSE	Acsl6	4	4	830000	0.00192			sp|Q80TR1|AGRL1_MOUSE	Adgrl1	3	3	310000	0.001		sp|Q03958|PFD6_MOUSE	Pfdn6
	sp|O89051|ITM2B_MOUSE	Itm2b	2	2	100000	0.000593			sp|Q3UPH1|PRRC1_MOUSE	Prrc1	2	2	620000	0.00156			tr|A2AUK8|A2AUK8_MOUSE	Epb41l1	2	2	240000	0.000932			sp|O35188|X3CL1_MOUSE	Cx3cl1	3	7	8500000	0.0162			sp|Q9D855|QCR7_MOUSE	Uqcrb	4	4	1300000	0.00292			sp|Q9QYJ0|DNJA2_MOUSE	Dnaja2	3	3	540000	0.00173		tr|Q6P0A6|Q6P0A6_MOUSE	Pcdh10
	sp|Q71KT5|ERG24_MOUSE	Tm7sf2	2	2	64000	0.000381			sp|P56564|EAA1_MOUSE	Slc1a3	2	2	160000	0.000393			sp|Q8BVI4|DHPR_MOUSE	Qdpr	2	2	180000	0.000708			tr|A0A0A6YY91|A0A0A6YY91_MOUSE	Ncam1	3	7	8300000	0.0158			sp|Q9D172|ES1_MOUSE	D10Jhu81e	4	4	1800000	0.00418			sp|P10833|RRAS_MOUSE	Rras	3	3	1600000	0.00525		sp|Q99M51|NCK1_MOUSE	Nck1
	sp|Q9CPX6|ATG3_MOUSE	Atg3	2	2	96000	0.00057			sp|Q9QYJ0|DNJA2_MOUSE	Dnaja2	2	2	270000	0.000683			sp|Q9CQU0|TXD12_MOUSE	Txndc12	2	2	360000	0.00141			tr|Q6P1J1|Q6P1J1_MOUSE	Crmp1	3	6	21000000	0.0393			sp|O70591|PFD2_MOUSE	Pfdn2	4	4	1400000	0.00328			sp|Q6KAU4|MB12B_MOUSE	Mvb12b	3	3	340000	0.00109		sp|Q91V92|ACLY_MOUSE	Acly
	sp|P10833|RRAS_MOUSE	Rras	2	2	250000	0.00148			sp|Q91VN4|MIC25_MOUSE	Chchd6	2	2	250000	0.000636			sp|Q9CRD0|OCAD1_MOUSE	Ociad1	2	2	240000	0.000932			sp|Q8BZ98|DYN3_MOUSE	Dnm3	3	6	1600000	0.00312			sp|Q9CYZ2|TPD54_MOUSE	Tpd52l2	4	4	1100000	0.00245			sp|Q9CQN1|TRAP1_MOUSE	Trap1	3	3	780000	0.00248		sp|Q9D379|HYEP_MOUSE	Ephx1
	sp|Q9WU60|ATRN_MOUSE	Atrn	2	2	100000	0.000606			tr|Q3UWL8|Q3UWL8_MOUSE	Pfdn4	2	2	240000	0.000612			sp|P97798|NEO1_MOUSE	Neo1	2	2	210000	0.000834			sp|O35682|MYADM_MOUSE	Myadm	3	6	3900000	0.00746			sp|P20108|PRDX3_MOUSE	Prdx3	4	4	3200000	0.00746			sp|Q6RHR9|MAGI1_MOUSE	Magi1	3	3	1600000	0.00497		sp|P01831|THY1_MOUSE	Thy1
	sp|P70333|HNRH2_MOUSE	Hnrnph2	2	2	52000	0.00031			sp|P35279|RAB6A_MOUSE	Rab6a	2	2	430000	0.00107			sp|P10605|CATB_MOUSE	Ctsb	2	2	350000	0.0014			sp|Q64433|CH10_MOUSE	Hspe1	3	6	21000000	0.0404			sp|P62627|DLRB1_MOUSE	Dynlrb1	4	4	2600000	0.00601			sp|P10630|IF4A2_MOUSE	Eif4a2	3	3	570000	0.00182		sp|P63044|VAMP2_MOUSE	Vamp2
	sp|Q8BG58|P4HTM_MOUSE	P4htm	2	2	84000	0.000494			sp|P16125|LDHB_MOUSE	Ldhb	2	2	430000	0.00108			sp|Q8VDL4|ADPGK_MOUSE	Adpgk	2	2	150000	0.00059			sp|P61982|1433G_MOUSE	Ywhag	3	5	13000000	0.0242			sp|P46425|GSTP2_MOUSE	Gstp2	4	4	1100000	0.00245			sp|Q9D172|ES1_MOUSE	D10Jhu81e	3	3	2400000	0.00768		sp|O70456|1433S_MOUSE	Sfn
	sp|Q9QUH0|GLRX1_MOUSE	Glrx	2	2	77000	0.000457			sp|Q8BHH2|RAB9B_MOUSE	Rab9b	2	2	440000	0.0011			sp|Q91VH6|MEMO1_MOUSE	Memo1	2	2	110000	0.000443			sp|P68037|UB2L3_MOUSE	Ube2l3	3	5	1900000	0.0036			sp|Q80TR1|AGRL1_MOUSE	Adgrl1	4	4	870000	0.002			sp|P63085|MK01_MOUSE	Mapk1	3	3	650000	0.00207		sp|Q9Z1W8|AT12A_MOUSE	Atp12a
	sp|Q9DB15|RM12_MOUSE	Mrpl12	2	2	230000	0.00135			sp|Q8R001|MARE2_MOUSE	Mapre2	2	2	450000	0.00114			sp|Q9D898|ARP5L_MOUSE	Arpc5l	2	2	530000	0.00211			sp|P19536|COX5B_MOUSE	Cox5b	3	5	4400000	0.00839			sp|Q99L13|3HIDH_MOUSE	Hibadh	4	4	480000	0.0011			sp|Q8R366|IGSF8_MOUSE	Igsf8	3	3	640000	0.00203		sp|P24668|MPRD_MOUSE	M6pr
	sp|Q91WD5|NDUS2_MOUSE	Ndufs2	2	2	59000	0.00035			tr|A2AUK8|A2AUK8_MOUSE	Epb41l1	2	2	470000	0.00119			sp|Q8BLV3|SL9A7_MOUSE	Slc9a7	2	2	79000	0.000315			tr|Q14BH8|Q14BH8_MOUSE	Cacna2d1	3	4	7800000	0.0148			sp|A2APX8|SCN1A_MOUSE	Scn1a	4	4	2000000	0.00461			sp|P59017|B2L13_MOUSE	Bcl2l13	3	3	1100000	0.00338		sp|P18760|COF1_MOUSE	Cfl1
	sp|P06728|APOA4_MOUSE	Apoa4	2	2	71000	0.000419			sp|Q99J99|THTM_MOUSE	Mpst	2	2	210000	0.000531			sp|Q9DCV4|RMD1_MOUSE	Rmdn1	2	2	100000	0.00041			tr|Q8C7C3|Q8C7C3_MOUSE	Tpm3	3	4	1900000	0.00365			sp|P60755|MDGA2_MOUSE	Mdga2	4	4	550000	0.00128			sp|Q8HW98|IGLO5_MOUSE	Iglon5	3	3	1500000	0.0047		sp|Q9CQ92|FIS1_MOUSE	Fis1
	sp|Q05909|PTPRG_MOUSE	Ptprg	2	2	75000	0.000446			sp|P70423|CTR3_MOUSE	Slc7a3	2	2	460000	0.00116			sp|Q9D358|PPAC_MOUSE	Acp1	2	2	270000	0.00107			sp|Q9WTT4|VATG2_MOUSE	Atp6v1g2	3	4	11000000	0.0215			sp|Q9WVK4|EHD1_MOUSE	Ehd1	4	4	960000	0.00222			sp|O35153|BET1L_MOUSE	Bet1l	3	3	680000	0.00218		sp|Q8HW98|IGLO5_MOUSE	Iglon5
	sp|Q9D1Q6|ERP44_MOUSE	Erp44	2	2	150000	0.000863			sp|Q3UX10|TBAL3_MOUSE	Tubal3	2	2	2000000	0.00497			sp|Q8VHH7|ADCY3_MOUSE	Adcy3	2	2	250000	0.000999			sp|Q8C996|TM163_MOUSE	Tmem163	3	4	3300000	0.00632			sp|Q8BMI3|GGA3_MOUSE	Gga3	4	4	860000	0.00199			sp|Q61809|LRRN1_MOUSE	Lrrn1	3	3	350000	0.00112		sp|P55821|STMN2_MOUSE	Stmn2
	sp|P30416|FKBP4_MOUSE	Fkbp4	2	2	190000	0.00112			sp|Q9D898|ARP5L_MOUSE	Arpc5l	2	2	780000	0.00195			sp|P46425|GSTP2_MOUSE	Gstp2	2	2	350000	0.00139			sp|Q3UHJ0|AAK1_MOUSE	Aak1	3	4	930000	0.00177			sp|Q9D1C8|VPS28_MOUSE	Vps28	4	4	1400000	0.00312			sp|P16125|LDHB_MOUSE	Ldhb	3	3	620000	0.00198		sp|O70251|EF1B_MOUSE	Eef1b
	sp|Q9DAS9|GBG12_MOUSE	Gng12	2	2	140000	0.000855			sp|Q8C996|TM163_MOUSE	Tmem163	2	2	290000	0.000724			sp|O88848|ARL6_MOUSE	Arl6	2	2	170000	0.000691			tr|Q5SUH6|Q5SUH6_MOUSE	Clint1	3	4	6800000	0.0129			sp|Q9CQI6|COTL1_MOUSE	Cotl1	4	4	1100000	0.00246			sp|Q9D880|TIM50_MOUSE	Timm50	3	3	370000	0.00119		sp|Q62159|RHOC_MOUSE	Rhoc
	sp|Q3UGS4|MCRI1_MOUSE	Mcrip1	2	2	150000	0.000902			sp|Q8BVI4|DHPR_MOUSE	Qdpr	2	2	240000	0.00061			sp|Q8BHH2|RAB9B_MOUSE	Rab9b	2	2	270000	0.00109			sp|Q8C0J2|A16L1_MOUSE	Atg16l1	3	4	1100000	0.00215			sp|Q91W90|TXND5_MOUSE	Txndc5	4	4	880000	0.00204			sp|Q8BRF7|SCFD1_MOUSE	Scfd1	3	3	870000	0.00278		sp|O88531|PPT1_MOUSE	Ppt1
	sp|Q64516|GLPK_MOUSE	Gk	2	2	120000	0.000728			sp|P27601|GNA13_MOUSE	Gna13	2	2	260000	0.00066			sp|P47809|MP2K4_MOUSE	Map2k4	2	2	500000	0.00197			sp|P06745|G6PI_MOUSE	Gpi	3	4	750000	0.00143			sp|P31938|MP2K1_MOUSE	Map2k1	4	4	950000	0.0022			sp|P17439|GLCM_MOUSE	Gba	3	3	890000	0.00285		sp|O35188|X3CL1_MOUSE	Cx3cl1
	sp|Q6NS82|RETR2_MOUSE	Retreg2	2	2	130000	0.000748			tr|A0A140T8J4|A0A140T8J4_MOUSE	Hebp1	2	2	650000	0.00163			sp|Q8VE88|F1142_MOUSE	Fam114a2	2	2	140000	0.000561			sp|Q920E5|FPPS_MOUSE	Fdps	3	4	960000	0.00183			sp|D3YVF0|AKAP5_MOUSE	Akap5	4	4	860000	0.00198			sp|Q9D6K5|SYJ2B_MOUSE	Synj2bp	3	3	480000	0.00154		sp|Q9WTT4|VATG2_MOUSE	Atp6v1g2
	sp|O88602|CCG2_MOUSE	Cacng2	2	2	84000	0.000497			sp|P01669|KV3AH_MOUSE		2	2	780000	0.00197			sp|Q0KL01|UBX2B_MOUSE	Ubxn2b	2	2	270000	0.00106			sp|Q8R555|CRAC1_MOUSE	Crtac1	3	4	1200000	0.00226			sp|Q07409|CNTN3_MOUSE	Cntn3	4	4	480000	0.0011			sp|P56399|UBP5_MOUSE	Usp5	3	3	310000	0.000975		sp|P46414|CDN1B_MOUSE	Cdkn1b
	sp|Q9Z0R6|ITSN2_MOUSE	Itsn2	2	2	310000	0.00183			sp|P63216|GBG3_MOUSE	Gng3	2	2	260000	0.000655			sp|Q6A051|ATRN1_MOUSE	Atrnl1	2	2	120000	0.000462			sp|O70480|VAMP4_MOUSE	Vamp4	3	4	3700000	0.00705			sp|Q9DB73|NB5R1_MOUSE	Cyb5r1	4	4	740000	0.00172			sp|Q62465|VAT1_MOUSE	Vat1	3	3	510000	0.00163		sp|Q80ZJ1|RAP2A_MOUSE	Rap2a
	sp|Q6NVE8|WDR44_MOUSE	Wdr44	2	2	46000	0.000271			sp|Q9R1T4|SEPT6_MOUSE	2017-09-06	2	2	150000	0.000367			sp|Q8BL66|EEA1_MOUSE	Eea1	2	2	110000	0.000448			sp|Q9WTX5|SKP1_MOUSE	Skp1	3	4	1300000	0.00244			sp|P54923|ADPRH_MOUSE	Adprh	4	4	2500000	0.00571			sp|Q80VP1|EPN1_MOUSE	Epn1	3	3	480000	0.00152		sp|O70591|PFD2_MOUSE	Pfdn2
	sp|Q64455|PTPRJ_MOUSE	Ptprj	2	2	58000	0.000341			sp|Q9CWK8|SNX2_MOUSE	Snx2	2	2	200000	0.000504			sp|Q9QYJ0|DNJA2_MOUSE	Dnaja2	2	2	150000	0.000587			sp|Q9WTR1|TRPV2_MOUSE	Trpv2	3	4	710000	0.00134			sp|O35393|EFNB3_MOUSE	Efnb3	4	4	660000	0.00152			sp|E9Q4P1|WDFY1_MOUSE	Wdfy1	3	3	1300000	0.004		sp|Q62419|SH3G1_MOUSE	Sh3gl1
	sp|Q922J3|CLIP1_MOUSE	Clip1	2	2	150000	0.000913			sp|Q9CQ48|NUDC2_MOUSE	Nudcd2	2	2	190000	0.000482			sp|Q8JZM4|DNER_MOUSE	Dner	2	2	150000	0.000601			sp|P55821|STMN2_MOUSE	Stmn2	3	4	3500000	0.00666			sp|Q61187|TS101_MOUSE	Tsg101	4	4	15000000	0.0338			sp|Q8VIM9|IRGQ_MOUSE	Irgq	3	3	460000	0.00147		sp|P35279|RAB6A_MOUSE	Rab6a
	tr|E9Q137|E9Q137_MOUSE	Tex264	2	2	110000	0.00063			sp|Q8BKG3|PTK7_MOUSE	Ptk7	2	2	250000	0.000623			sp|P81117|NUCB2_MOUSE	Nucb2	2	2	170000	0.000675			sp|Q8BTX9|HSDL1_MOUSE	Hsdl1	3	4	650000	0.00124			sp|Q9CY50|SSRA_MOUSE	Ssr1	4	4	1000000	0.00233			sp|Q6P5F9|XPO1_MOUSE	Xpo1	3	3	270000	0.000877		sp|Q9D6J6|NDUV2_MOUSE	Ndufv2
	sp|Q8R0H9|GGA1_MOUSE	Gga1	2	2	100000	0.000595			sp|Q7TSK2|SEZ6_MOUSE	Sez6	2	2	300000	0.00076			sp|Q9D7A8|ARMC1_MOUSE	Armc1	2	2	260000	0.00104			sp|Q80SW1|SAHH2_MOUSE	Ahcyl1	3	4	700000	0.00133			sp|Q9D2G2|ODO2_MOUSE	Dlst	4	4	1300000	0.0031			sp|Q64455|PTPRJ_MOUSE	Ptprj	3	3	440000	0.00139		sp|Q9WTL7|LYPA2_MOUSE	Lypla2
	sp|Q9CR00|PSMD9_MOUSE	Psmd9	2	2	170000	0.000995			sp|Q8VCM8|NCLN_MOUSE	Ncln	2	2	230000	0.000569			sp|O08997|ATOX1_MOUSE	Atox1	2	2	1400000	0.00561			sp|Q923L3|CSMD1_MOUSE	Csmd1	3	4	990000	0.00188			sp|P28658|ATX10_MOUSE	Atxn10	4	4	660000	0.00153			sp|P54923|ADPRH_MOUSE	Adprh	3	3	850000	0.00271		tr|B8JJG7|B8JJG7_MOUSE	Tfg
	sp|Q9JKB1|UCHL3_MOUSE	Uchl3	2	2	79000	0.000464			sp|Q9JM76|ARPC3_MOUSE	Arpc3	2	2	480000	0.00122			sp|Q9WVQ1|MAGI2_MOUSE	Magi2	2	2	300000	0.0012			sp|Q91WS0|CISD1_MOUSE	Cisd1	3	4	2000000	0.00373			sp|Q8CGK3|LONM_MOUSE	Lonp1	4	4	930000	0.00215			sp|Q9CYZ2|TPD54_MOUSE	Tpd52l2	3	3	480000	0.00154		sp|Q3UMR5|MCU_MOUSE	Mcu
	sp|P80315|TCPD_MOUSE	Cct4	2	2	76000	0.000452			sp|P70429|EVL_MOUSE	Evl	2	2	620000	0.00157			sp|Q8CHC4|SYNJ1_MOUSE	Synj1	2	2	130000	0.000507			sp|O70492|SNX3_MOUSE	Snx3	3	4	3700000	0.00698			sp|P59999|ARPC4_MOUSE	Arpc4	4	4	1700000	0.00403			sp|Q8BMI3|GGA3_MOUSE	Gga3	3	3	730000	0.00233		sp|P11404|FABPH_MOUSE	Fabp3
	sp|Q8K135|K319L_MOUSE	Kiaa0319l	2	2	71000	0.000421			sp|Q9D358|PPAC_MOUSE	Acp1	2	2	280000	0.000712			sp|Q99JI6|RAP1B_MOUSE	Rap1b	2	2	830000	0.0033			sp|Q99JH7|CSTN3_MOUSE	Clstn3	3	4	1400000	0.00257			sp|Q9EPR5|SORC2_MOUSE	Sorcs2	4	4	510000	0.00117			sp|Q99MN9|PCCB_MOUSE	Pccb	3	3	370000	0.00119		sp|Q91WS0|CISD1_MOUSE	Cisd1
	sp|Q8R4F1|NTNG2_MOUSE	Ntng2	2	2	92000	0.000542			sp|O70443|GNAZ_MOUSE	Gnaz	2	2	360000	0.000906			sp|Q9JLM8|DCLK1_MOUSE	Dclk1	2	2	260000	0.00102			sp|O88531|PPT1_MOUSE	Ppt1	3	4	7600000	0.0145			sp|Q64455|PTPRJ_MOUSE	Ptprj	4	4	830000	0.00192			sp|Q61081|CDC37_MOUSE	Cdc37	3	3	1500000	0.00464		sp|Q9DB60|PGFS_MOUSE	Fam213b
	sp|Q9QZ88|VPS29_MOUSE	Vps29	2	2	250000	0.0015			sp|O88342|WDR1_MOUSE	Wdr1	2	2	240000	0.000612			sp|O35449|PRRT1_MOUSE	Prrt1	2	2	300000	0.0012			sp|P61211|ARL1_MOUSE	Arl1	3	4	2300000	0.0044			sp|Q9DBJ1|PGAM1_MOUSE	Pgam1	4	4	810000	0.00187			sp|P20357|MTAP2_MOUSE	Map2	3	3	220000	0.000713		sp|P45878|FKBP2_MOUSE	Fkbp2
	sp|O88456|CPNS1_MOUSE	Capns1	2	2	110000	0.000678			sp|Q9QY81|PO210_MOUSE	Nup210	2	2	300000	0.000742			sp|Q3UDR8|YIPF3_MOUSE	Yipf3	2	2	270000	0.00106			sp|Q91VU0|FAM3C_MOUSE	Fam3c	3	4	690000	0.00132			sp|Q80WQ2|VAC14_MOUSE	Vac14	4	4	560000	0.00129			sp|Q64133|AOFA_MOUSE	Maoa	3	3	630000	0.002		sp|Q6P5F7|TTYH3_MOUSE	Ttyh3
	sp|P35279|RAB6A_MOUSE	Rab6a	2	2	170000	0.000993			sp|Q8K135|K319L_MOUSE	Kiaa0319l	2	2	210000	0.00052			sp|P61961|UFM1_MOUSE	Ufm1	2	2	580000	0.00229			sp|Q9CZD3|GARS_MOUSE	Gars	3	4	940000	0.00178			sp|Q9CX00|IST1_MOUSE	Ist1	4	4	710000	0.00164			sp|Q62420|SH3G2_MOUSE	Sh3gl2	3	3	1400000	0.00452		sp|P68181|KAPCB_MOUSE	Prkacb
	sp|Q8VDL4|ADPGK_MOUSE	Adpgk	2	2	120000	0.000709			sp|P52800|EFNB2_MOUSE	Efnb2	2	2	140000	0.000349			sp|P35822|PTPRK_MOUSE	Ptprk	2	2	190000	0.000737			sp|P60335|PCBP1_MOUSE	Pcbp1	3	4	1300000	0.00248			sp|Q6VNS1|NTRK3_MOUSE	Ntrk3	4	4	3500000	0.00809			sp|P35821|PTN1_MOUSE	Ptpn1	3	3	350000	0.00113		sp|Q9QYG0|NDRG2_MOUSE	Ndrg2
	sp|P05201|AATC_MOUSE	Got1	2	2	97000	0.000571			sp|P17439|GLCM_MOUSE	Gba	2	2	600000	0.0015			sp|Q9CQI3|GMFB_MOUSE	Gmfb	2	2	510000	0.00202			sp|Q99P47|CNTP4_MOUSE	Cntnap4	3	4	600000	0.00113			sp|O35114|SCRB2_MOUSE	Scarb2	4	4	2500000	0.00577			sp|P68181|KAPCB_MOUSE	Prkacb	3	3	1300000	0.00405		sp|P68037|UB2L3_MOUSE	Ube2l3
	sp|P42932|TCPQ_MOUSE	Cct8	2	2	110000	0.00066			sp|Q9D855|QCR7_MOUSE	Uqcrb	2	2	500000	0.00125			sp|P61759|PFD3_MOUSE	Vbp1	2	2	63000	0.000248			sp|P45878|FKBP2_MOUSE	Fkbp2	3	4	2700000	0.00516			sp|Q8VDW0|DX39A_MOUSE	Ddx39a	4	4	1500000	0.0035			sp|Q9Z0X1|AIFM1_MOUSE	Aifm1	3	3	320000	0.00104		sp|Q8VE62|PAIP1_MOUSE	Paip1
	sp|O35344|IMA4_MOUSE	Kpna3	2	2	66000	0.000392			sp|Q80ZJ1|RAP2A_MOUSE	Rap2a	2	2	860000	0.00215			sp|Q8BHK2|SCN3B_MOUSE	Scn3b	2	2	840000	0.00334			sp|P15532|NDKA_MOUSE	Nme1	3	4	2200000	0.00421			sp|O35685|NUDC_MOUSE	Nudc	4	4	1000000	0.0023			sp|Q9Z0L0|TPBG_MOUSE	Tpbg	3	3	830000	0.00267		sp|Q9D880|TIM50_MOUSE	Timm50
	sp|Q9D0E3|LYSM1_MOUSE	Lysmd1	2	2	120000	0.000723			sp|O54931|AKAP2_MOUSE	Akap2	2	2	99000	0.000249			sp|Q11011|PSA_MOUSE	Npepps	2	2	190000	0.000741			tr|Q3U3W2|Q3U3W2_MOUSE	Tmem181a	3	4	2600000	0.00498			sp|Q8BGR6|ARL15_MOUSE	Arl15	4	4	1100000	0.00245			sp|Q9CQ45|NENF_MOUSE	Nenf	3	3	540000	0.00173		sp|O54984|ASNA_MOUSE	Asna1
	sp|O35633|VIAAT_MOUSE	Slc32a1	2	2	590000	0.00349			sp|Q9CQI3|GMFB_MOUSE	Gmfb	2	2	550000	0.00137			sp|Q9D3A9|TTYH1_MOUSE	Ttyh1	2	2	710000	0.00281			sp|Q921E2|RAB31_MOUSE	Rab31	3	3	810000	0.00154			sp|Q99LI8|HGS_MOUSE	Hgs	4	4	1200000	0.00276			sp|Q8R180|ERO1A_MOUSE	Ero1a	3	3	580000	0.00186		sp|P08228|SODC_MOUSE	Sod1
	sp|Q8VEK0|CC50A_MOUSE	Tmem30a	2	2	250000	0.00149			sp|Q99MN9|PCCB_MOUSE	Pccb	2	2	82000	0.000206			sp|Q9QY81|PO210_MOUSE	Nup210	2	2	120000	0.000472			sp|P12367|KAP2_MOUSE	Prkar2a	3	3	4300000	0.0081			sp|Q9QY76|VAPB_MOUSE	Vapb	4	4	2800000	0.00655			sp|Q9DCS9|NDUBA_MOUSE	Ndufb10	3	3	590000	0.00188		sp|Q60648|SAP3_MOUSE	Gm2a
	sp|P23818|GRIA1_MOUSE	Gria1	2	2	66000	0.000389			sp|O35449|PRRT1_MOUSE	Prrt1	2	2	460000	0.00114			sp|Q8VD37|SGIP1_MOUSE	Sgip1	2	2	200000	0.0008			sp|O35887|CALU_MOUSE	Calu	3	3	950000	0.00181			sp|Q9EPR4|S23A2_MOUSE	Slc23a2	4	4	640000	0.00149			sp|Q9Z1R2|BAG6_MOUSE	Bag6	3	3	340000	0.00109		sp|Q9D7E4|CS025_MOUSE
	sp|Q8CDN6|TXNL1_MOUSE	Txnl1	2	2	50000	0.000294			sp|Q99JI6|RAP1B_MOUSE	Rap1b	2	2	870000	0.00219			sp|Q61330|CNTN2_MOUSE	Cntn2	2	2	120000	0.000462			sp|Q8R5J9|PRAF3_MOUSE	Arl6ip5	3	3	1500000	0.00291			sp|Q8BR63|F177A_MOUSE	Fam177a1	4	4	6300000	0.0145			sp|Q8C3W1|CA198_MOUSE		3	3	650000	0.00206		sp|P35288|RAB23_MOUSE	Rab23
	sp|Q91V12|BACH_MOUSE	Acot7	2	2	350000	0.0021			sp|Q9DB60|PGFS_MOUSE	Fam213b	2	2	1600000	0.00396			sp|Q62186|SSRD_MOUSE	Ssr4	2	2	1300000	0.00519			sp|Q9Z2X1|HNRPF_MOUSE	Hnrnpf	3	3	1300000	0.00245			sp|D3YZP9|CCDC6_MOUSE	Ccdc6	4	4	1500000	0.00348			sp|O35449|PRRT1_MOUSE	Prrt1	3	3	760000	0.00241		sp|Q9D3A9|TTYH1_MOUSE	Ttyh1
	sp|Q8BWF0|SSDH_MOUSE	Aldh5a1	2	2	150000	0.000877			sp|Q8BG58|P4HTM_MOUSE	P4htm	2	2	270000	0.00067			sp|Q8BKX1|BAIP2_MOUSE	Baiap2	2	2	150000	0.000594			sp|P10833|RRAS_MOUSE	Rras	3	3	3400000	0.00644			sp|P97441|ZNT3_MOUSE	Slc30a3	4	4	1400000	0.00328			sp|P30416|FKBP4_MOUSE	Fkbp4	3	3	490000	0.00156		sp|Q9QXT0|CNPY2_MOUSE	Cnpy2
	sp|Q91YJ2|SNX4_MOUSE	Snx4	2	2	53000	0.000316			sp|P47809|MP2K4_MOUSE	Map2k4	2	2	1100000	0.00273			sp|Q7TNP2|2AAB_MOUSE	Ppp2r1b	2	2	440000	0.00175			sp|P63216|GBG3_MOUSE	Gng3	3	3	580000	0.00109			sp|Q91XD7|CREL1_MOUSE	Creld1	4	4	1400000	0.00312			sp|Q3UPH1|PRRC1_MOUSE	Prrc1	3	3	500000	0.0016		sp|P12815|PDCD6_MOUSE	Pdcd6
	sp|Q6RHR9|MAGI1_MOUSE	Magi1	2	2	67000	0.000395			sp|Q91WC3|ACSL6_MOUSE	Acsl6	2	2	300000	0.000742			sp|Q9WV92|E41L3_MOUSE	Epb41l3	2	2	170000	0.000686			sp|P06151|LDHA_MOUSE	Ldha	3	3	1500000	0.00286			sp|Q8BKG3|PTK7_MOUSE	Ptk7	4	4	580000	0.00133			sp|P80316|TCPE_MOUSE	Cct5	3	3	490000	0.00157		sp|Q8BJU0|SGTA_MOUSE	Sgta
	sp|Q8K2C9|HACD3_MOUSE	Hacd3	2	2	100000	0.000591			sp|Q9R1V6|ADA22_MOUSE	Adam22	2	2	490000	0.00122			sp|Q9CQH3|NDUB5_MOUSE	Ndufb5	2	2	270000	0.00105			sp|A2A699|F1712_MOUSE	Fam171a2	3	3	560000	0.00107			sp|O88587|COMT_MOUSE	Comt	4	4	450000	0.00105			tr|B2RXT3|B2RXT3_MOUSE	Ogdhl	3	3	420000	0.00134		sp|Q8R366|IGSF8_MOUSE	Igsf8
	sp|O89053|COR1A_MOUSE	Coro1a	2	2	78000	0.00046			sp|Q9CZS1|AL1B1_MOUSE	Aldh1b1	2	2	190000	0.000486			sp|Q8BFZ9|ERLN2_MOUSE	Erlin2	2	2	180000	0.000694			sp|Q9DBL1|ACDSB_MOUSE	Acadsb	3	3	790000	0.0015			sp|P47809|MP2K4_MOUSE	Map2k4	4	4	4200000	0.00974			sp|Q3UH93|PLXD1_MOUSE	Plxnd1	3	3	430000	0.00136		sp|O88456|CPNS1_MOUSE	Capns1
	sp|P60755|MDGA2_MOUSE	Mdga2	2	2	70000	0.000413			sp|Q6A051|ATRN1_MOUSE	Atrnl1	2	2	240000	0.000608			sp|Q9QZ73|DCNL1_MOUSE	Dcun1d1	2	2	180000	0.000705			sp|D3YZP9|CCDC6_MOUSE	Ccdc6	3	3	990000	0.00189			sp|Q923L3|CSMD1_MOUSE	Csmd1	4	4	750000	0.00172			sp|Q62393|TPD52_MOUSE	Tpd52	3	3	1000000	0.00329		sp|Q71M36|CSPG5_MOUSE	Cspg5
	sp|Q9D8S9|BOLA1_MOUSE	Bola1	2	2	91000	0.000536			sp|D3YVF0|AKAP5_MOUSE	Akap5	2	2	410000	0.00104			sp|Q8CHS8|VP37A_MOUSE	Vps37a	2	2	160000	0.000618			sp|Q99PU5|ACBG1_MOUSE	Acsbg1	3	3	570000	0.00108			sp|P48962|ADT1_MOUSE	Slc25a4	4	4	1200000	0.00277			sp|Q791V5|MTCH2_MOUSE	Mtch2	3	3	970000	0.00311		sp|Q9WUZ9|ENTP5_MOUSE	Entpd5
	sp|P19324|SERPH_MOUSE	Serpinh1	2	2	100000	0.000607			sp|Q8BNU0|ARMC6_MOUSE	Armc6	2	2	660000	0.00167			sp|P01669|KV3AH_MOUSE		2	2	510000	0.00202			sp|P63330|PP2AA_MOUSE	Ppp2ca	3	3	950000	0.00181			sp|Q99LX0|PARK7_MOUSE	Park7	4	4	1600000	0.00374			sp|Q91ZA3|PCCA_MOUSE	Pcca	3	3	2900000	0.00935		sp|Q91XD7|CREL1_MOUSE	Creld1
	sp|O88307|SORL_MOUSE	Sorl1	2	2	85000	0.000501			sp|Q9CQ22|LTOR1_MOUSE	Lamtor1	2	2	400000	0.000999			sp|Q9WU60|ATRN_MOUSE	Atrn	2	2	250000	0.000979			sp|O88643|PAK1_MOUSE	Pak1	3	3	1100000	0.00208			sp|Q8K0D5|EFGM_MOUSE	Gfm1	4	4	610000	0.0014			sp|Q8K3C3|LZIC_MOUSE	Lzic	3	3	960000	0.00306		sp|Q9D1Q6|ERP44_MOUSE	Erp44
	sp|Q9JHZ2|ANKH_MOUSE	Ankh	2	2	76000	0.00045			sp|P12815|PDCD6_MOUSE	Pdcd6	2	2	1000000	0.00263			sp|P68404|KPCB_MOUSE	Prkcb	2	2	340000	0.00135			sp|Q9DCS9|NDUBA_MOUSE	Ndufb10	3	3	1100000	0.00206			sp|Q6P069|SORCN_MOUSE	Sri	4	4	730000	0.00168			sp|P63216|GBG3_MOUSE	Gng3	3	3	1100000	0.00337		sp|Q64133|AOFA_MOUSE	Maoa
	sp|O35682|MYADM_MOUSE	Myadm	1	11	550000	0.00328			sp|Q9QXV0|PCSK1_MOUSE	Pcsk1n	2	2	230000	0.000577			sp|O88487|DC1I2_MOUSE	Dync1i2	2	2	100000	0.000396			sp|Q80U63|MFN2_MOUSE	Mfn2	3	3	610000	0.00115			sp|P49443|PPM1A_MOUSE	Ppm1a	4	4	1400000	0.00312			sp|P70663|SPRL1_MOUSE	Sparcl1	3	3	360000	0.00116		sp|Q9DBP5|KCY_MOUSE	Cmpk1
	sp|P62746|RHOB_MOUSE	Rhob	1	10	1300000	0.00795			sp|P05532|KIT_MOUSE	Kit	2	2	140000	0.000353			sp|P41216|ACSL1_MOUSE	Acsl1	2	2	120000	0.000495			sp|Q9D3L0|F174A_MOUSE	Fam174a	3	3	770000	0.00146			sp|Q8BIJ6|SYIM_MOUSE	Iars2	4	4	640000	0.00148			sp|Q91WC3|ACSL6_MOUSE	Acsl6	3	3	520000	0.00167		sp|Q08122|TLE3_MOUSE	Tle3
	sp|Q9D1Q4|DPM3_MOUSE	Dpm3	1	7	540000	0.00317			sp|Q62442|VAMP1_MOUSE	Vamp1	2	2	390000	0.000989			sp|Q8C078|KKCC2_MOUSE	Camkk2	2	2	90000	0.000358			tr|A2RSX9|A2RSX9_MOUSE	Arfip1	3	3	1100000	0.0021			sp|Q9CPQ1|COX6C_MOUSE	Cox6c	4	4	940000	0.00218			sp|Q9CZD3|GARS_MOUSE	Gars	3	3	560000	0.00178		sp|Q9JIP4|PANX1_MOUSE	Panx1
	tr|Q6PJA7|Q6PJA7_MOUSE	Igh	1	7	19000000	0.11			sp|Q920V1|B3GL1_MOUSE	B3galnt1	2	2	310000	0.00078			sp|P26339|CMGA_MOUSE	Chga	2	2	150000	0.000581			sp|Q9D6J6|NDUV2_MOUSE	Ndufv2	3	3	960000	0.00183			tr|A2MY50|A2MY50_MOUSE		3	23	420000000	0.96			sp|Q61753|SERA_MOUSE	Phgdh	3	3	250000	0.000799		sp|Q4VAA2|CDV3_MOUSE	Cdv3
	sp|Q9JJV2|PROF2_MOUSE	Pfn2	1	6	2700000	0.0162			sp|Q9CW79|GOGA1_MOUSE	Golga1	2	2	140000	0.000353			sp|Q8BH58|TIPRL_MOUSE	Tiprl	2	2	150000	0.000577			sp|Q80VP1|EPN1_MOUSE	Epn1	3	3	880000	0.00167			sp|Q62442|VAMP1_MOUSE	Vamp1	3	21	61000000	0.14			sp|Q7TNR6|IGS21_MOUSE	Igsf21	3	3	800000	0.00255		sp|B1AXV0|FRS1L_MOUSE	Frrs1l
	sp|Q7TMM9|TBB2A_MOUSE	Tubb2a	1	6	2800000	0.0165			sp|Q61301|CTNA2_MOUSE	Ctnna2	2	2	150000	0.000378			sp|Q9D0R8|LSM12_MOUSE	Lsm12	2	2	280000	0.00112			sp|Q8R2Y8|PTH2_MOUSE	Ptrh2	3	3	630000	0.00119			sp|P63024|VAMP3_MOUSE	Vamp3	3	18	730000000	1.67			sp|Q8K201|KCT2_MOUSE	Kct2	3	3	740000	0.00237		sp|Q9CY50|SSRA_MOUSE	Ssr1
	tr|G3X9J1|G3X9J1_MOUSE	Slc8a1	1	6	1800000	0.0107			sp|Q641P0|ARP3B_MOUSE	Actr3b	2	2	150000	0.000385			sp|Q9DCS9|NDUBA_MOUSE	Ndufb10	2	2	170000	0.000675			sp|Q5DQR4|STB5L_MOUSE	Stxbp5l	3	3	370000	0.000701			sp|Q91ZZ3|SYUB_MOUSE	Sncb	3	17	430000000	0.99			sp|P61979|HNRPK_MOUSE	Hnrnpk	3	3	640000	0.00204		sp|P63216|GBG3_MOUSE	Gng3
	sp|Q0VF58|COJA1_MOUSE	Col19a1	1	6	7800000	0.0459			sp|Q9QXT0|CNPY2_MOUSE	Cnpy2	2	2	750000	0.00189			sp|Q60629|EPHA5_MOUSE	Epha5	2	2	120000	0.000468			sp|Q9QYI5|DNJB2_MOUSE	Dnajb2	3	3	3700000	0.00705			sp|P01831|THY1_MOUSE	Thy1	3	17	170000000	0.38			sp|Q99JY9|ARP3_MOUSE	Actr3	3	3	1600000	0.00526		sp|Q99JH7|CSTN3_MOUSE	Clstn3
	sp|Q8VBT0|TMX1_MOUSE	Tmx1	1	5	800000	0.00474			sp|O35658|C1QBP_MOUSE	C1qbp	2	2	460000	0.00117			sp|Q9JJZ4|UB2J1_MOUSE	Ube2j1	2	2	190000	0.000734			sp|Q9CRA4|MSMO1_MOUSE	Msmo1	3	3	2600000	0.00485			sp|O55100|SNG1_MOUSE	Syngr1	3	17	190000000	0.44			sp|Q00623|APOA1_MOUSE	Apoa1	3	3	900000	0.00287		sp|P62075|TIM13_MOUSE	Timm13
	sp|Q9CR51|VATG1_MOUSE	Atp6v1g1	1	5	420000	0.00248			sp|Q61206|PA1B2_MOUSE	Pafah1b2	2	2	300000	0.000752			sp|Q8BIW1|PRUN1_MOUSE	Prune1	2	2	150000	0.000579			sp|Q8BW96|KCC1D_MOUSE	Camk1d	3	3	1500000	0.00291			tr|E9QB01|E9QB01_MOUSE	Ncam1	3	11	49000000	0.11			sp|Q99L13|3HIDH_MOUSE	Hibadh	3	3	370000	0.00119		sp|P29533|VCAM1_MOUSE	Vcam1
	sp|P63168|DYL1_MOUSE	Dynll1	1	5	1300000	0.00796			sp|Q9JHU4|DYHC1_MOUSE	Dync1h1	2	2	170000	0.000429			sp|Q91YP2|NEUL_MOUSE	Nln	2	2	200000	0.000797			sp|O88848|ARL6_MOUSE	Arl6	3	3	730000	0.00139			sp|Q9QZI8|SERC1_MOUSE	Serinc1	3	11	3100000	0.00715			sp|Q9CQI6|COTL1_MOUSE	Cotl1	3	3	860000	0.00275		sp|Q01768|NDKB_MOUSE	Nme2
	sp|P08228|SODC_MOUSE	Sod1	1	5	620000	0.00368			tr|Q3UH83|Q3UH83_MOUSE	Gucy1a2	2	2	210000	0.000516			sp|O09126|SEM4D_MOUSE	Sema4d	2	2	180000	0.000722			sp|P63321|RALA_MOUSE	Rala	3	3	780000	0.00148			sp|Q6P5F7|TTYH3_MOUSE	Ttyh3	3	8	630000	0.00147			sp|P31938|MP2K1_MOUSE	Map2k1	3	3	490000	0.00157		sp|Q61941|NNTM_MOUSE	Nnt
	sp|Q9D593|VATE2_MOUSE	Atp6v1e2	1	5	1400000	0.00828			sp|Q9D7A8|ARMC1_MOUSE	Armc1	2	2	500000	0.00125			sp|O70443|GNAZ_MOUSE	Gnaz	2	2	160000	0.000648			sp|O88602|CCG2_MOUSE	Cacng2	3	3	4000000	0.00753			tr|Q6P1J1|Q6P1J1_MOUSE	Crmp1	3	7	19000000	0.0434			sp|P48962|ADT1_MOUSE	Slc25a4	3	3	780000	0.00248		sp|P45591|COF2_MOUSE	Cfl2
	tr|Q99JZ4|Q99JZ4_MOUSE	Sar1a	1	4	5100000	0.0302			sp|Q8CHS8|VP37A_MOUSE	Vps37a	2	2	220000	0.000543			sp|P11983|TCPA_MOUSE	Tcp1	2	2	130000	0.000529			sp|Q64455|PTPRJ_MOUSE	Ptprj	3	3	870000	0.00166			tr|E0CYM8|E0CYM8_MOUSE	Sirpa	3	7	19000000	0.0439			sp|Q3UJP5|CH037_MOUSE		3	3	300000	0.000973		sp|Q923S9|RAB30_MOUSE	Rab30
	sp|P97447|FHL1_MOUSE	Fhl1	1	4	330000	0.00198			sp|Q4VAA2|CDV3_MOUSE	Cdv3	2	2	490000	0.00123			sp|P03930|ATP8_MOUSE	Mtatp8	2	2	2300000	0.00918			tr|B2RX09|B2RX09_MOUSE	Nrxn2	3	3	740000	0.0014			tr|Q6PGJ3|Q6PGJ3_MOUSE	L1cam	3	6	20000000	0.0469			sp|Q05816|FABP5_MOUSE	Fabp5	3	3	2800000	0.00891		sp|Q9D3L0|F174A_MOUSE	Fam174a
	tr|A0A0J9YUN4|A0A0J9YUN4_MOUSE	Dnm1	1	4	660000	0.0039			sp|Q9Z2Q6|SEPT5_MOUSE	2017-09-05	2	2	270000	0.000673			sp|Q641P0|ARP3B_MOUSE	Actr3b	2	2	98000	0.00039			sp|Q5RKR3|ISLR2_MOUSE	Islr2	3	3	410000	0.000779			sp|Q9CQX2|CYB5B_MOUSE	Cyb5b	3	6	16000000	0.0367			sp|Q8R555|CRAC1_MOUSE	Crtac1	3	3	640000	0.00203		sp|Q6PGH2|JUPI2_MOUSE	Jpt2
	tr|Q3U1B1|Q3U1B1_MOUSE	Gnb1	1	4	2900000	0.0171			sp|P12658|CALB1_MOUSE	Calb1	2	2	130000	0.000338			sp|Q03137|EPHA4_MOUSE	Epha4	2	2	190000	0.000755			sp|Q62419|SH3G1_MOUSE	Sh3gl1	3	3	1200000	0.00235			tr|E9Q137|E9Q137_MOUSE	Tex264	3	6	820000	0.0019			sp|P35700|PRDX1_MOUSE	Prdx1	3	3	1100000	0.00359		sp|Q9WV91|FPRP_MOUSE	Ptgfrn
	sp|Q8VEA4|MIA40_MOUSE	Chchd4	1	3	140000	0.00083			sp|Q64455|PTPRJ_MOUSE	Ptprj	2	2	490000	0.00123			sp|Q9D819|IPYR_MOUSE	Ppa1	2	2	240000	0.000938			sp|Q9D1C8|VPS28_MOUSE	Vps28	3	3	1100000	0.00203			sp|Q9D772|F219A_MOUSE	Fam219a	3	6	3800000	0.0087			sp|Q4VAE3|TMM65_MOUSE	Tmem65	3	3	1800000	0.00569		sp|Q3U1F9|PHAG1_MOUSE	Pag1
	sp|Q91XD7|CREL1_MOUSE	Creld1	1	3	330000	0.00198			sp|Q9CQM9|GLRX3_MOUSE	Glrx3	2	2	240000	0.000594			sp|P53811|PIPNB_MOUSE	Pitpnb	2	2	190000	0.000758			sp|Q8BM72|HSP13_MOUSE	Hspa13	3	3	2300000	0.00441			sp|Q8R5J9|PRAF3_MOUSE	Arl6ip5	3	5	1700000	0.00388			sp|P28658|ATX10_MOUSE	Atxn10	3	3	470000	0.0015		sp|Q9CR00|PSMD9_MOUSE	Psmd9
	tr|Q7M6W1|Q7M6W1_MOUSE	Rtn1	1	3	9300000	0.0552			sp|P62075|TIM13_MOUSE	Timm13	2	2	1900000	0.00466			sp|Q01853|TERA_MOUSE	Vcp	2	2	150000	0.000576			sp|Q59J78|MIMIT_MOUSE	Ndufaf2	3	3	810000	0.00154			sp|O08539|BIN1_MOUSE	Bin1	3	5	450000	0.00103			sp|Q9WV54|ASAH1_MOUSE	Asah1	3	3	410000	0.00131		sp|Q3UHK1|MYCT_MOUSE	Slc2a13
	tr|A0A1W2P814|A0A1W2P814_MOUSE	Nrcam	1	3	940000	0.00558			sp|O35685|NUDC_MOUSE	Nudc	2	2	630000	0.00158			sp|Q91XD7|CREL1_MOUSE	Creld1	2	2	380000	0.00151			sp|Q01279|EGFR_MOUSE	Egfr	3	3	1300000	0.00247			sp|Q8VDP6|CDIPT_MOUSE	Cdipt	3	5	3000000	0.00697			sp|Q80TL4|PHF24_MOUSE	Phf24	3	3	560000	0.00179		tr|A2AUK8|A2AUK8_MOUSE	Epb41l1
	sp|Q6P8I4|PCNP_MOUSE	Pcnp	1	3	120000	0.00073			sp|Q9CZ42|NNRD_MOUSE	Naxd	2	2	330000	0.000842			sp|P45878|FKBP2_MOUSE	Fkbp2	2	2	1700000	0.0069			sp|Q8BUV3|GEPH_MOUSE	Gphn	3	3	660000	0.00125			sp|Q9QXY6|EHD3_MOUSE	Ehd3	3	4	720000	0.00165			sp|Q6PDM2|SRSF1_MOUSE	Srsf1	3	3	710000	0.00227		sp|Q63932|MP2K2_MOUSE	Map2k2
	tr|Q80VM5|Q80VM5_MOUSE	Dpp6	1	3	150000	0.000865			sp|Q9Z0X1|AIFM1_MOUSE	Aifm1	2	2	280000	0.00071			sp|Q04736|YES_MOUSE	Yes1	2	2	85000	0.000337			sp|Q7TME0|PLPR4_MOUSE	Plppr4	3	3	1300000	0.00256			tr|Q5SUH6|Q5SUH6_MOUSE	Clint1	3	4	5500000	0.0127			sp|Q91YT0|NDUV1_MOUSE	Ndufv1	3	3	370000	0.00119		sp|Q9WTP7|KAD3_MOUSE	Ak3
	sp|Q791V5|MTCH2_MOUSE	Mtch2	1	3	230000	0.00136			sp|Q8R1R3|STAR7_MOUSE	Stard7	2	2	950000	0.00239			sp|Q80U63|MFN2_MOUSE	Mfn2	2	2	100000	0.000412			sp|Q7TPB0|PLPR3_MOUSE	Plppr3	3	3	780000	0.00149			sp|P47754|CAZA2_MOUSE	Capza2	3	4	2000000	0.00454			sp|Q59J78|MIMIT_MOUSE	Ndufaf2	3	3	670000	0.00214		sp|P70423|CTR3_MOUSE	Slc7a3
	sp|Q08122|TLE3_MOUSE	Tle3	1	3	30000	0.00018			sp|P29533|VCAM1_MOUSE	Vcam1	2	2	190000	0.000485			sp|Q8R555|CRAC1_MOUSE	Crtac1	2	2	220000	0.000883			sp|Q9QXT0|CNPY2_MOUSE	Cnpy2	3	3	1700000	0.0033			sp|Q8C0J2|A16L1_MOUSE	Atg16l1	3	4	890000	0.00205			sp|Q3UEB3|PUF60_MOUSE	Puf60	3	3	280000	0.000903		tr|A2RSX9|A2RSX9_MOUSE	Arfip1
	sp|Q61672|S29A2_MOUSE	Slc29a2	1	3	210000	0.00123			sp|Q91XD7|CREL1_MOUSE	Creld1	2	2	1000000	0.00259			sp|Q8BGT8|PHIPL_MOUSE	Phyhipl	2	2	270000	0.00106			sp|P70699|LYAG_MOUSE	Gaa	3	3	410000	0.000775			sp|Q61081|CDC37_MOUSE	Cdc37	3	4	1000000	0.00233			sp|P10126|EF1A1_MOUSE	Eef1a1	3	3	890000	0.00283		sp|Q61753|SERA_MOUSE	Phgdh
	sp|P61804|DAD1_MOUSE	Dad1	1	3	690000	0.00408			sp|Q8K0C4|CP51A_MOUSE	Cyp51a1	2	2	150000	0.000375			sp|Q8BYR5|CAPS2_MOUSE	Cadps2	2	2	250000	0.000976			sp|P20444|KPCA_MOUSE	Prkca	3	3	3200000	0.00611			sp|Q62419|SH3G1_MOUSE	Sh3gl1	3	4	1900000	0.00441			sp|A2APX8|SCN1A_MOUSE	Scn1a	3	3	780000	0.00251		sp|Q9D855|QCR7_MOUSE	Uqcrb
	sp|Q9D1M0|SEC13_MOUSE	Sec13	1	3	70000	0.000413			sp|P61924|COPZ1_MOUSE	Copz1	2	2	210000	0.000527			sp|Q6PGH2|JUPI2_MOUSE	Jpt2	2	2	350000	0.0014			sp|Q6P2L7|CASC4_MOUSE	Casc4	3	3	690000	0.00131			sp|Q9D3L0|F174A_MOUSE	Fam174a	3	4	760000	0.00176			tr|Q0VBD0|Q0VBD0_MOUSE	Itgb8	3	3	480000	0.00152		sp|Q9R111|GUAD_MOUSE	Gda
	sp|P97823|LYPA1_MOUSE	Lypla1	1	3	120000	0.000695			sp|Q9D0R8|LSM12_MOUSE	Lsm12	2	2	450000	0.00112			sp|Q9CZ42|NNRD_MOUSE	Naxd	2	2	260000	0.00103			sp|Q921J2|RHEB_MOUSE	Rheb	3	3	4800000	0.00904			sp|P68181|KAPCB_MOUSE	Prkacb	3	4	1800000	0.00417			sp|Q6WVG3|KCD12_MOUSE	Kctd12	3	3	300000	0.000945		sp|Q62443|NPTX1_MOUSE	Nptx1
	sp|Q08093|CNN2_MOUSE	Cnn2	1	3	370000	0.0022			sp|Q9D7V2|LYSM2_MOUSE	Lysmd2	2	2	300000	0.000766			sp|P31254|UBA1Y_MOUSE	Uba1y	2	2	420000	0.00165			sp|Q8VDQ8|SIR2_MOUSE	Sirt2	3	3	1000000	0.00189			sp|Q8BZ98|DYN3_MOUSE	Dnm3	3	4	1400000	0.00327			sp|Q9DCW4|ETFB_MOUSE	Etfb	3	3	840000	0.00268		sp|Q8K201|KCT2_MOUSE	Kct2
	sp|Q62523|ZYX_MOUSE	Zyx	1	3	250000	0.00147			sp|Q9DBP5|KCY_MOUSE	Cmpk1	2	2	370000	0.000927			sp|Q9R0Q9|MPU1_MOUSE	Mpdu1	2	2	200000	0.000789			sp|O88696|CLPP_MOUSE	Clpp	3	3	610000	0.00116			tr|Q8C7C3|Q8C7C3_MOUSE	Tpm3	3	4	4100000	0.00953			IGH1M_MOUSE	Ighg1	3	3	1200000	0.00397		sp|Q9Z0R6|ITSN2_MOUSE	Itsn2
	tr|A2AIR5|A2AIR5_MOUSE	Grin3a	1	3	3700000	0.0221			sp|P14152|MDHC_MOUSE	Mdh1	2	2	700000	0.00176			sp|P97441|ZNT3_MOUSE	Slc30a3	2	2	310000	0.00122			sp|O88455|DHCR7_MOUSE	Dhcr7	3	3	670000	0.00127			sp|Q9WTL7|LYPA2_MOUSE	Lypla2	3	4	1800000	0.00414			sp|O70493|SNX12_MOUSE	Snx12	3	3	1400000	0.00461		tr|Q0VBD0|Q0VBD0_MOUSE	Itgb8
	sp|Q4KML4|ABRAL_MOUSE	Abracl	1	3	160000	0.000969			sp|Q11011|PSA_MOUSE	Npepps	2	2	210000	0.000516			sp|Q9EQ20|MMSA_MOUSE	Aldh6a1	2	2	130000	0.000503			sp|Q9QXY6|EHD3_MOUSE	Ehd3	3	3	440000	0.000832			sp|O35682|MYADM_MOUSE	Myadm	3	4	1500000	0.00352			sp|Q8VHH7|ADCY3_MOUSE	Adcy3	3	3	530000	0.0017		sp|O08709|PRDX6_MOUSE	Prdx6
	sp|P04370|MBP_MOUSE	Mbp	1	2	95000	0.000562			sp|Q6PGF7|EXOC8_MOUSE	Exoc8	2	2	480000	0.00122			sp|P97467|AMD_MOUSE	Pam	2	2	140000	0.000574			sp|Q80TS3|AGRL3_MOUSE	Adgrl3	3	3	600000	0.00113			sp|O09111|NDUBB_MOUSE	Ndufb11	3	4	710000	0.00163			sp|Q61301|CTNA2_MOUSE	Ctnna2	3	3	500000	0.00158		sp|Q8BR63|F177A_MOUSE	Fam177a1
	sp|P01669|KV3AH_MOUSE		1	2	480000	0.00284			sp|Q5FW52|MLIP_MOUSE	Mlip	2	2	1000000	0.00253			sp|O35454|CLCN6_MOUSE	Clcn6	2	2	160000	0.000645			sp|Q8C3W1|CA198_MOUSE		3	3	720000	0.00137			tr|Q14BH8|Q14BH8_MOUSE	Cacna2d1	3	4	5300000	0.0121			sp|Q6P069|SORCN_MOUSE	Sri	3	3	720000	0.0023		tr|Q3U3W2|Q3U3W2_MOUSE	Tmem181a
	sp|Q08509|EPS8_MOUSE	Eps8	1	2	43000	0.000253			sp|Q8BMP6|GCP60_MOUSE	Acbd3	2	2	120000	0.000306			sp|P35951|LDLR_MOUSE	Ldlr	2	2	71000	0.00028			sp|P16125|LDHB_MOUSE	Ldhb	3	3	910000	0.00172			sp|Q8VDQ8|SIR2_MOUSE	Sirt2	3	4	1900000	0.00442			sp|P19096|FAS_MOUSE	Fasn	3	3	200000	0.000654		sp|P46425|GSTP2_MOUSE	Gstp2
	tr|Q3TML0|Q3TML0_MOUSE	Pdia6	1	2	870000	0.00514			tr|B2RXT3|B2RXT3_MOUSE	Ogdhl	2	2	240000	0.000596			sp|Q8BWT1|THIM_MOUSE	Acaa2	2	2	150000	0.000608			sp|Q9JMB8|CNTN6_MOUSE	Cntn6	3	3	480000	0.000911			sp|Q91VU0|FAM3C_MOUSE	Fam3c	3	4	1100000	0.00252			sp|Q91YP2|NEUL_MOUSE	Nln	3	3	410000	0.0013		sp|Q68FE2|ATG9A_MOUSE	Atg9a
	sp|Q9CPU4|MGST3_MOUSE	Mgst3	1	2	94000	0.000555			sp|P62627|DLRB1_MOUSE	Dynlrb1	2	2	2400000	0.00592			sp|Q9JIP4|PANX1_MOUSE	Panx1	2	2	340000	0.00136			sp|Q9DCB8|ISCA2_MOUSE	Isca2	3	3	1500000	0.00281			sp|Q78YZ6|SCOC_MOUSE	Scoc	3	4	2400000	0.00562			sp|Q9D1P4|CHRD1_MOUSE	Chordc1	3	3	440000	0.00139		sp|O35658|C1QBP_MOUSE	C1qbp
	sp|Q9D3A9|TTYH1_MOUSE	Ttyh1	1	2	570000	0.0034			sp|Q9R111|GUAD_MOUSE	Gda	2	2	140000	0.000351			tr|Q3UH83|Q3UH83_MOUSE	Gucy1a2	2	2	72000	0.000284			sp|P62869|ELOB_MOUSE	Elob	3	3	500000	0.000949			sp|Q8BKC5|IPO5_MOUSE	Ipo5	3	4	470000	0.00109			sp|A2A8L5|PTPRF_MOUSE	Ptprf	3	3	450000	0.00143		sp|Q9QZ23|NFU1_MOUSE	Nfu1
	tr|G5E8G3|G5E8G3_MOUSE	Opcml	1	2	340000	0.00204			sp|O88485|DC1I1_MOUSE	Dync1i1	2	2	170000	0.00042			sp|Q9JIG8|PRAF2_MOUSE	Praf2	2	2	400000	0.00158			sp|Q9QZ06|TOLIP_MOUSE	Tollip	3	3	700000	0.00134			sp|Q791V5|MTCH2_MOUSE	Mtch2	3	4	1700000	0.00391			sp|Q61941|NNTM_MOUSE	Nnt	3	3	420000	0.00134		sp|O88737|BSN_MOUSE	Bsn
	sp|Q80X50|UBP2L_MOUSE	Ubap2l	1	2	280000	0.00163			sp|Q9CQH3|NDUB5_MOUSE	Ndufb5	2	2	450000	0.00114			sp|P20108|PRDX3_MOUSE	Prdx3	2	2	560000	0.00221			sp|Q8R4F1|NTNG2_MOUSE	Ntng2	3	3	1200000	0.00234			sp|Q3UMR5|MCU_MOUSE	Mcu	3	4	2800000	0.00645			sp|Q8C7E9|CSTFT_MOUSE	Cstf2t	3	3	390000	0.00124		sp|Q8K2P7|S38A1_MOUSE	Slc38a1
	sp|O88986|KBL_MOUSE	Gcat	1	2	35000	0.000205			sp|P05480|SRC_MOUSE	Src	2	2	160000	0.000407			sp|P59999|ARPC4_MOUSE	Arpc4	2	2	660000	0.00263			sp|Q8VE62|PAIP1_MOUSE	Paip1	3	3	1200000	0.00229			tr|B8JJG7|B8JJG7_MOUSE	Tfg	3	4	6300000	0.0146			sp|Q99LX0|PARK7_MOUSE	Park7	3	3	990000	0.00315		sp|Q3TDN2|FAF2_MOUSE	Faf2
	sp|P51880|FABP7_MOUSE	Fabp7	1	2	1000000	0.00603			sp|Q91YP2|NEUL_MOUSE	Nln	2	2	300000	0.000754			sp|Q6NZL0|SOGA3_MOUSE	Soga3	2	2	200000	0.000791			sp|Q9CQN1|TRAP1_MOUSE	Trap1	3	3	790000	0.00151			sp|P48771|CX7A2_MOUSE	Cox7a2	3	4	3400000	0.00791			sp|P58389|PTPA_MOUSE	Ptpa	3	3	280000	0.000879		sp|P32921|SYWC_MOUSE	Wars
	sp|P10639|THIO_MOUSE	Txn	1	2	3000000	0.0175			sp|Q91WK2|EIF3H_MOUSE	Eif3h	2	2	190000	0.000471			sp|Q9D855|QCR7_MOUSE	Uqcrb	2	2	240000	0.000971			sp|Q9Z0X1|AIFM1_MOUSE	Aifm1	3	3	610000	0.00117			sp|Q9QYG0|NDRG2_MOUSE	Ndrg2	3	4	1000000	0.00233			sp|P62869|ELOB_MOUSE	Elob	3	3	600000	0.00191		sp|Q9D1P4|CHRD1_MOUSE	Chordc1
	sp|Q9CQU5|ZWINT_MOUSE	Zwint	1	2	37000	0.00022			sp|O88487|DC1I2_MOUSE	Dync1i2	2	2	130000	0.000322			sp|D3YVF0|AKAP5_MOUSE	Akap5	2	2	110000	0.000421			sp|Q9R0P5|DEST_MOUSE	Dstn	3	3	1100000	0.00213			sp|Q9D6J6|NDUV2_MOUSE	Ndufv2	3	4	750000	0.00172			sp|P0DI97|NRX1B_MOUSE	Nrxn1	3	3	950000	0.00305		sp|Q6NS82|RETR2_MOUSE	Retreg2
	sp|Q5M8N0|CNRP1_MOUSE	Cnrip1	1	2	720000	0.00428			sp|Q61166|MARE1_MOUSE	Mapre1	2	2	240000	0.000591			sp|Q3U1F9|PHAG1_MOUSE	Pag1	2	2	930000	0.00369			sp|Q9QXV0|PCSK1_MOUSE	Pcsk1n	3	3	780000	0.00148			sp|P10833|RRAS_MOUSE	Rras	3	4	3100000	0.00712			sp|Q921G7|ETFD_MOUSE	Etfdh	3	3	440000	0.0014		sp|O08807|PRDX4_MOUSE	Prdx4
	sp|Q9CRA5|GOLP3_MOUSE	Golph3	1	2	640000	0.00377			sp|Q9DCB4|ARP21_MOUSE	Arpp21	2	2	130000	0.00033			sp|Q9CPW4|ARPC5_MOUSE	Arpc5	2	2	530000	0.00211			sp|Q9JIP4|PANX1_MOUSE	Panx1	3	3	1200000	0.00233			sp|Q9D0F3|LMAN1_MOUSE	Lman1	3	4	1500000	0.00351			sp|Q91W90|TXND5_MOUSE	Txndc5	3	3	470000	0.00151		sp|Q99J99|THTM_MOUSE	Mpst
	sp|O89023|TPP1_MOUSE	Tpp1	1	2	360000	0.00216			sp|P14824|ANXA6_MOUSE	Anxa6	2	2	360000	0.000907			sp|Q61941|NNTM_MOUSE	Nnt	2	2	200000	0.000774			sp|P09055|ITB1_MOUSE	Itgb1	3	3	2500000	0.00478			sp|Q9R1Q8|TAGL3_MOUSE	Tagln3	3	4	2200000	0.00508			sp|Q9JIF0|ANM1_MOUSE	Prmt1	3	3	470000	0.00151		sp|Q8BG58|P4HTM_MOUSE	P4htm
	sp|Q8R4S0|PP14C_MOUSE	Ppp1r14c	1	2	330000	0.00197			sp|P58774|TPM2_MOUSE	Tpm2	2	2	2200000	0.00543			tr|Q58E70|Q58E70_MOUSE	Tpm3	2	2	570000	0.00226			sp|Q99KV1|DJB11_MOUSE	Dnajb11	3	3	790000	0.00149			sp|P35821|PTN1_MOUSE	Ptpn1	3	4	950000	0.00219			sp|Q6VNS1|NTRK3_MOUSE	Ntrk3	3	3	490000	0.00157		sp|Q9JMA1|UBP14_MOUSE	Usp14
	sp|Q8BHC1|RB39B_MOUSE	Rab39b	1	2	100000	0.000603			sp|Q8C437|PEX5R_MOUSE	Pex5l	2	2	650000	0.00163			sp|Q9Z0X1|AIFM1_MOUSE	Aifm1	2	2	100000	0.000406			sp|P05201|AATC_MOUSE	Got1	3	3	530000	0.00101			sp|O88653|LTOR3_MOUSE	Lamtor3	3	4	1400000	0.00313			sp|Q8BGU5|CCNY_MOUSE	Ccny	3	3	600000	0.0019		sp|Q62421|SH3G3_MOUSE	Sh3gl3
	sp|P47955|RLA1_MOUSE	Rplp1	1	2	2100000	0.0127			tr|Q3URQ4|Q3URQ4_MOUSE	Fam8a1	2	2	150000	0.000389			sp|Q8K135|K319L_MOUSE	Kiaa0319l	2	2	180000	0.000703			tr|Q3TU36|Q3TU36_MOUSE	Rap1gds1	3	3	550000	0.00105			IGH1M_MOUSE	Ighg1	3	4	4400000	0.0102			tr|Q3U3W2|Q3U3W2_MOUSE	Tmem181a	3	3	780000	0.00248		sp|A2A699|F1712_MOUSE	Fam171a2
	sp|Q91X78|ERLN1_MOUSE	Erlin1	1	2	250000	0.00145			sp|O88737|BSN_MOUSE	Bsn	2	2	240000	0.000597			sp|P67778|PHB_MOUSE	Phb	2	2	230000	0.000924			sp|P56399|UBP5_MOUSE	Usp5	3	3	690000	0.00132			sp|Q9DBP5|KCY_MOUSE	Cmpk1	3	4	560000	0.00129			sp|Q3UHK1|MYCT_MOUSE	Slc2a13	3	3	590000	0.00189		sp|O88952|LIN7C_MOUSE	Lin7c
	sp|O35658|C1QBP_MOUSE	C1qbp	1	2	320000	0.00192			sp|Q9JMA1|UBP14_MOUSE	Usp14	2	2	220000	0.000557			tr|Q4VA93|Q4VA93_MOUSE	Prkca	2	2	350000	0.00137			sp|P10126|EF1A1_MOUSE	Eef1a1	3	3	1100000	0.00216			sp|Q3TDN2|FAF2_MOUSE	Faf2	3	4	760000	0.00176			sp|P24638|PPAL_MOUSE	Acp2	3	3	890000	0.00283		sp|A2TJV2|PALM3_MOUSE	Palm3
	sp|E9Q7F2|RN169_MOUSE	Rnf169	1	2	140000	0.000822			sp|P05201|AATC_MOUSE	Got1	2	2	310000	0.000768			sp|Q8K097|LFG2_MOUSE	Faim2	2	2	170000	0.000692			sp|Q3U1F9|PHAG1_MOUSE	Pag1	3	3	1900000	0.00355			sp|O88643|PAK1_MOUSE	Pak1	3	3	780000	0.0018			sp|Q08331|CALB2_MOUSE	Calb2	3	3	2000000	0.00632		sp|Q99P47|CNTP4_MOUSE	Cntnap4
	sp|Q61016|GBG7_MOUSE	Gng7	1	2	780000	0.0046			sp|Q9DBL9|ABHD5_MOUSE	Abhd5	2	2	250000	0.000638			sp|Q9D0S9|HINT2_MOUSE	Hint2	2	2	290000	0.00114			sp|Q61187|TS101_MOUSE	Tsg101	3	3	950000	0.00181			sp|Q6RHR9|MAGI1_MOUSE	Magi1	3	3	1100000	0.00256			sp|Q62442|VAMP1_MOUSE	Vamp1	2	27	40000000	0.13		sp|P97950|RB33A_MOUSE	Rab33a
	sp|P17751|TPIS_MOUSE	Tpi1	1	2	310000	0.00185			tr|Q58E70|Q58E70_MOUSE	Tpm3	2	2	920000	0.00232			sp|Q3UJP5|CH037_MOUSE		2	2	110000	0.000432			sp|P59999|ARPC4_MOUSE	Arpc4	3	3	1600000	0.00307			sp|Q8C996|TM163_MOUSE	Tmem163	3	3	1900000	0.00445			sp|P63024|VAMP3_MOUSE	Vamp3	2	17	400000000	1.28		sp|Q64310|SURF4_MOUSE	Surf4
	sp|O70401|TSN6_MOUSE	Tspan6	1	2	200000	0.00121			sp|Q810C1|SLIK1_MOUSE	Slitrk1	2	2	330000	0.000825			sp|O88952|LIN7C_MOUSE	Lin7c	2	2	290000	0.00114			sp|Q9WUK2|IF4H_MOUSE	Eif4h	3	3	4000000	0.00758			sp|P06745|G6PI_MOUSE	Gpi	3	3	630000	0.00146			sp|Q9QZI8|SERC1_MOUSE	Serinc1	2	14	1300000	0.00412		sp|O35153|BET1L_MOUSE	Bet1l
	sp|Q8BUM6|F163B_MOUSE	Fam163b	1	2	190000	0.00115			sp|Q9DCZ4|MIC26_MOUSE	Apoo	2	2	320000	0.000808			sp|Q8BGQ7|SYAC_MOUSE	Aars	2	2	150000	0.000584			sp|Q91XD7|CREL1_MOUSE	Creld1	3	3	1000000	0.00193			sp|P14824|ANXA6_MOUSE	Anxa6	3	3	500000	0.00115			sp|Q3V3I2|GNAT3_MOUSE	Gnat3	2	11	100000000	0.33		sp|P11798|KCC2A_MOUSE	Camk2a
	sp|P29595|NEDD8_MOUSE	Nedd8	1	2	1100000	0.00642			sp|Q6NVE8|WDR44_MOUSE	Wdr44	2	2	150000	0.000371			sp|Q9QXW9|LAT2_MOUSE	Slc7a8	2	2	140000	0.000538			sp|O88844|IDHC_MOUSE	Idh1	3	3	550000	0.00105			sp|P70663|SPRL1_MOUSE	Sparcl1	3	3	430000	0.000995			sp|P62737|ACTA_MOUSE	Acta2	2	9	54000000	0.17		sp|Q91VK1|BZW2_MOUSE	Bzw2
	sp|Q7TPB0|PLPR3_MOUSE	Plppr3	1	2	120000	0.000727			sp|Q62421|SH3G3_MOUSE	Sh3gl3	2	2	280000	0.000704			sp|P62858|RS28_MOUSE	Rps28	2	2	620000	0.00245			sp|P08228|SODC_MOUSE	Sod1	3	3	1700000	0.00327			sp|Q61036|PAK3_MOUSE	Pak3	3	3	290000	0.00066			sp|P84086|CPLX2_MOUSE	Cplx2	2	9	930000	0.00296		sp|Q9DBL9|ABHD5_MOUSE	Abhd5
	sp|Q9CQN6|TM14C_MOUSE	Tmem14c	1	2	480000	0.00281			sp|Q922D8|C1TC_MOUSE	Mthfd1	2	2	180000	0.00046			sp|P97823|LYPA1_MOUSE	Lypla1	2	2	280000	0.00112			sp|Q07409|CNTN3_MOUSE	Cntn3	3	3	580000	0.00111			sp|P06151|LDHA_MOUSE	Ldha	3	3	1500000	0.00342			sp|P60766|CDC42_MOUSE	Cdc42	2	8	25000000	0.0787		sp|Q9DCB8|ISCA2_MOUSE	Isca2
	sp|P97783|AF1Q_MOUSE	Mllt11	1	2	330000	0.00195			sp|Q8BXR1|S7A14_MOUSE	Slc7a14	2	2	260000	0.000654			sp|Q8R0A7|K0513_MOUSE	Kiaa0513	2	2	120000	0.000474			sp|Q8BGR6|ARL15_MOUSE	Arl15	3	3	1000000	0.00193			sp|Q8R366|IGSF8_MOUSE	Igsf8	3	3	1300000	0.00301			sp|Q9CR51|VATG1_MOUSE	Atp6v1g1	2	8	6200000	0.0197		sp|P70699|LYAG_MOUSE	Gaa
	sp|Q9CQH3|NDUB5_MOUSE	Ndufb5	1	2	380000	0.00224			sp|O55131|SEPT7_MOUSE	2017-09-07	2	2	220000	0.000562			sp|P09055|ITB1_MOUSE	Itgb1	2	2	600000	0.00237			sp|O54984|ASNA_MOUSE	Asna1	3	3	870000	0.00165			sp|Q9R1V6|ADA22_MOUSE	Adam22	3	3	740000	0.0017			sp|P17879|HS71B_MOUSE	Hspa1b	2	6	38000000	0.12		sp|P56395|CYB5_MOUSE	Cyb5a
	sp|P58774|TPM2_MOUSE	Tpm2	1	2	1900000	0.0109			sp|Q6P069|SORCN_MOUSE	Sri	2	2	210000	0.00054			sp|Q3UHD6|SNX27_MOUSE	Snx27	2	2	300000	0.00121			sp|P49443|PPM1A_MOUSE	Ppm1a	3	3	1000000	0.0019			sp|Q6KAU4|MB12B_MOUSE	Mvb12b	3	3	700000	0.00161			sp|Q9WUC3|LY6H_MOUSE	Ly6h	2	5	710000	0.00225		sp|Q9DBU0|TM9S1_MOUSE	Tm9sf1
	tr|B2L107|B2L107_MOUSE	Vsnl1	1	2	84000	0.000494			tr|A2RSX9|A2RSX9_MOUSE	Arfip1	2	2	280000	0.000697			sp|Q05909|PTPRG_MOUSE	Ptprg	2	2	180000	0.000716			sp|Q61036|PAK3_MOUSE	Pak3	3	3	590000	0.00111			sp|Q8BGH7|C42S2_MOUSE	Cdc42se2	3	3	620000	0.00142			sp|Q9CYN9|RENR_MOUSE	Atp6ap2	2	5	9800000	0.0314		sp|P67778|PHB_MOUSE	Phb
	tr|Q3UXU0|Q3UXU0_MOUSE	Tsc22d1	1	2	90000	0.000533			sp|Q9CPW4|ARPC5_MOUSE	Arpc5	2	2	890000	0.00224			sp|Q8C0E2|VP26B_MOUSE	Vps26b	2	2	310000	0.00123			sp|Q6NZL0|SOGA3_MOUSE	Soga3	3	3	570000	0.00109			sp|Q62420|SH3G2_MOUSE	Sh3gl2	3	3	1700000	0.00392			sp|Q9CQ92|FIS1_MOUSE	Fis1	2	5	3900000	0.0125		sp|P46978|STT3A_MOUSE	Stt3a
	tr|D3Z6G3|D3Z6G3_MOUSE	Mapre3	1	2	130000	0.000741			sp|P56395|CYB5_MOUSE	Cyb5a	2	2	990000	0.0025			sp|Q62283|TSN7_MOUSE	Tspan7	2	2	520000	0.00207			sp|Q9Z0R6|ITSN2_MOUSE	Itsn2	3	3	1200000	0.00234			sp|O88456|CPNS1_MOUSE	Capns1	3	3	360000	0.000839			sp|Q9D772|F219A_MOUSE	Fam219a	2	5	2500000	0.00787		sp|Q922J3|CLIP1_MOUSE	Clip1
	sp|Q9Z172|SUMO3_MOUSE	Sumo3	1	2	230000	0.00133			sp|P61961|UFM1_MOUSE	Ufm1	2	2	810000	0.00205			sp|Q61206|PA1B2_MOUSE	Pafah1b2	2	2	280000	0.00111			sp|Q9D8B7|JAM3_MOUSE	Jam3	3	3	350000	0.00067			sp|O88531|PPT1_MOUSE	Ppt1	3	3	4500000	0.0105			tr|G5E8R2|G5E8R2_MOUSE	Tpm1	2	5	570000	0.00183		sp|Q63912|OMGP_MOUSE	Omg
	sp|Q9D880|TIM50_MOUSE	Timm50	1	2	96000	0.000569			sp|Q8BH27|MEGF9_MOUSE	Megf9	2	2	230000	0.000576			sp|Q9WTR1|TRPV2_MOUSE	Trpv2	2	2	390000	0.00154			sp|P12815|PDCD6_MOUSE	Pdcd6	3	3	980000	0.00187			tr|Q8BXB3|Q8BXB3_MOUSE	Slc8a1	3	3	2200000	0.00509			sp|P48455|PP2BC_MOUSE	Ppp3cc	2	5	6200000	0.0197		sp|P80316|TCPE_MOUSE	Cct5
	sp|P00158|CYB_MOUSE	Mt-Cyb	1	2	290000	0.00173			sp|P10605|CATB_MOUSE	Ctsb	2	2	440000	0.00111			sp|Q921G7|ETFD_MOUSE	Etfdh	2	2	180000	0.000724			sp|Q9Z0M5|LICH_MOUSE	Lipa	3	3	520000	0.000993			sp|P97333|NRP1_MOUSE	Nrp1	3	3	680000	0.00157			tr|A0A0R4J1Z7|A0A0R4J1Z7_MOUSE	Sirpa	2	4	20000000	0.0634		sp|Q8BJN4|FNDC9_MOUSE	Fndc9
	sp|Q9QXW9|LAT2_MOUSE	Slc7a8	1	2	85000	0.000504			sp|Q3UHH2|S22AN_MOUSE	Slc22a23	2	2	430000	0.00108			sp|Q9D8S9|BOLA1_MOUSE	Bola1	2	2	100000	0.000401			sp|Q91YT0|NDUV1_MOUSE	Ndufv1	3	3	570000	0.00108			sp|P63085|MK01_MOUSE	Mapk1	3	3	720000	0.00166			sp|Q9JJV2|PROF2_MOUSE	Pfn2	2	4	2400000	0.00776		sp|Q9DCB4|ARP21_MOUSE	Arpp21
	sp|P68372|TBB4B_MOUSE	Tubb4b	1	2	150000	0.000891			sp|Q00623|APOA1_MOUSE	Apoa1	2	2	1700000	0.00437			sp|P70699|LYAG_MOUSE	Gaa	2	2	74000	0.000294			sp|B1AXV0|FRS1L_MOUSE	Frrs1l	3	3	690000	0.00132			sp|Q61249|IGBP1_MOUSE	Igbp1	3	3	530000	0.00123			sp|Q78YZ6|SCOC_MOUSE	Scoc	2	4	3500000	0.011		sp|Q9R0M6|RAB9A_MOUSE	Rab9a
	sp|Q9D772|F219A_MOUSE	Fam219a	1	2	150000	0.000882			sp|A2TJV2|PALM3_MOUSE	Palm3	2	2	140000	0.00034			sp|Q9CQG6|TM147_MOUSE	Tmem147	2	2	170000	0.000654			sp|Q8BIQ5|CSTF2_MOUSE	Cstf2	3	3	1200000	0.00227			sp|Q7TQI3|OTUB1_MOUSE	Otub1	3	3	400000	0.000929			sp|P62492|RB11A_MOUSE	Rab11a	2	4	590000	0.00187		sp|Q60673|PTPRN_MOUSE	Ptprn
	sp|Q8CI43|MYL6B_MOUSE	Myl6b	1	2	250000	0.00147			sp|Q9EQG7|ENPP5_MOUSE	Enpp5	2	2	130000	0.000321			sp|Q9CR30|JOS2_MOUSE	Josd2	2	2	160000	0.000635			sp|Q8BR63|F177A_MOUSE	Fam177a1	3	3	5600000	0.0106			sp|Q9CXW3|CYBP_MOUSE	Cacybp	3	3	670000	0.00155			sp|Q80U63|MFN2_MOUSE	Mfn2	2	4	380000	0.00121		sp|P02469|LAMB1_MOUSE	Lamb1
	sp|Q91YT0|NDUV1_MOUSE	Ndufv1	1	2	230000	0.00139			sp|Q791V5|MTCH2_MOUSE	Mtch2	2	2	590000	0.00149			sp|Q8BGR6|ARL15_MOUSE	Arl15	2	2	350000	0.00137			sp|A2AFS3|K1324_MOUSE	Kiaa1324	3	3	1200000	0.00228			sp|P27601|GNA13_MOUSE	Gna13	3	3	710000	0.00165			sp|Q91W97|HKDC1_MOUSE	Hkdc1	2	4	4900000	0.0157		sp|P52795|EFNB1_MOUSE	Efnb1
	sp|Q62441|TLE4_MOUSE	Tle4	1	2	300000	0.00176			sp|P54830|PTN5_MOUSE	Ptpn5	2	2	110000	0.000281			sp|O54984|ASNA_MOUSE	Asna1	2	2	230000	0.000915			sp|P68404|KPCB_MOUSE	Prkcb	3	3	600000	0.00115			sp|Q9CWK8|SNX2_MOUSE	Snx2	3	3	900000	0.00207			sp|Q9QXY6|EHD3_MOUSE	Ehd3	2	3	580000	0.00185		sp|Q6P5F9|XPO1_MOUSE	Xpo1
	sp|Q9JMG3|TMUB1_MOUSE	Tmub1	1	2	69000	0.000407			sp|Q9R0S3|MMP17_MOUSE	Mmp17	2	2	260000	0.000644			sp|Q91W90|TXND5_MOUSE	Txndc5	2	2	170000	0.000672			sp|Q63844|MK03_MOUSE	Mapk3	3	3	970000	0.00185			sp|Q8BWT1|THIM_MOUSE	Acaa2	3	3	550000	0.00126			sp|P26883|FKB1A_MOUSE	Fkbp1a	2	3	2700000	0.00857		sp|Q3UJP5|CH037_MOUSE
	sp|Q99J83|ATG5_MOUSE	Atg5	1	2	120000	0.000692			sp|Q9ES89|EXTL2_MOUSE	Extl2	2	2	240000	0.000602			sp|O08529|CAN2_MOUSE	Capn2	2	2	120000	0.000485			sp|Q9DCW4|ETFB_MOUSE	Etfb	3	3	750000	0.00143			sp|Q9Z2X1|HNRPF_MOUSE	Hnrnpf	3	3	790000	0.00183			sp|Q9DCB4|ARP21_MOUSE	Arpp21	2	3	250000	0.000785		sp|Q9DCT2|NDUS3_MOUSE	Ndufs3
	sp|P08556|RASN_MOUSE	Nras	1	2	280000	0.00163			sp|Q9CQZ1|HSBP1_MOUSE	Hsbp1	2	2	510000	0.00128			sp|Q3UZV7|K132L_MOUSE		2	2	150000	0.000588			sp|P31938|MP2K1_MOUSE	Map2k1	3	3	730000	0.00139			sp|Q9DCS9|NDUBA_MOUSE	Ndufb10	3	3	800000	0.00185			tr|Q5SUH6|Q5SUH6_MOUSE	Clint1	2	3	3600000	0.0116		sp|P70280|VAMP7_MOUSE	Vamp7
	sp|Q78IK2|USMG5_MOUSE	Usmg5	1	2	170000	0.000986			sp|Q9JJU8|SH3L1_MOUSE	Sh3bgrl	2	2	300000	0.000762			sp|Q6NS82|RETR2_MOUSE	Retreg2	2	2	160000	0.000643			sp|O88653|LTOR3_MOUSE	Lamtor3	3	3	1000000	0.00195			sp|Q99JI6|RAP1B_MOUSE	Rap1b	3	3	1900000	0.00433			sp|O88456|CPNS1_MOUSE	Capns1	2	3	230000	0.000746		sp|Q9QY81|PO210_MOUSE	Nup210
	sp|Q80ZJ1|RAP2A_MOUSE	Rap2a	1	2	480000	0.00283			sp|Q99P47|CNTP4_MOUSE	Cntnap4	2	2	240000	0.000598			sp|Q64310|SURF4_MOUSE	Surf4	2	2	390000	0.00156			sp|Q9CY50|SSRA_MOUSE	Ssr1	3	3	930000	0.00178			sp|O88455|DHCR7_MOUSE	Dhcr7	3	3	540000	0.00125			tr|A0A1W2P882|A0A1W2P882_MOUSE	Atp2b1	2	3	2400000	0.00778		tr|A2RS43|A2RS43_MOUSE	Pcdh7
	sp|Q8BI08|MAL2_MOUSE	Mal2	1	2	2500000	0.0148			tr|G3X8R0|G3X8R0_MOUSE	Reep5	2	2	700000	0.00176			sp|Q3UE37|UBE2Z_MOUSE	Ube2z	2	2	230000	0.000919			sp|P61082|UBC12_MOUSE	Ube2m	3	3	2100000	0.00396			sp|Q8K201|KCT2_MOUSE	Kct2	3	3	1300000	0.003			sp|Q99L43|CDS2_MOUSE	Cds2	2	3	3600000	0.0116		sp|Q8BWG8|ARRB1_MOUSE	Arrb1
	sp|P20152|VIME_MOUSE	Vim	1	2	220000	0.00132			sp|Q8BGH7|C42S2_MOUSE	Cdc42se2	2	2	180000	0.000463			sp|Q9ERR1|NDEL1_MOUSE	Ndel1	2	2	140000	0.000545			sp|Q60648|SAP3_MOUSE	Gm2a	3	3	1500000	0.00279			tr|B2RXT3|B2RXT3_MOUSE	Ogdhl	3	3	350000	0.00081			sp|Q7TSJ2|MAP6_MOUSE	Map6	2	3	250000	0.000813		sp|Q5FWK3|RHG01_MOUSE	Arhgap1
	sp|P62838|UB2D2_MOUSE	Ube2d2	1	2	590000	0.0035			sp|P32921|SYWC_MOUSE	Wars	2	2	150000	0.000372			sp|Q91YT0|NDUV1_MOUSE	Ndufv1	2	2	110000	0.000426			sp|Q61941|NNTM_MOUSE	Nnt	3	3	690000	0.00131			sp|P56399|UBP5_MOUSE	Usp5	3	3	390000	0.000891			sp|P70349|HINT1_MOUSE	Hint1	2	3	3000000	0.00944		sp|Q9CPQ1|COX6C_MOUSE	Cox6c
	tr|D1FNM8|D1FNM8_MOUSE	Atp2b4	1	2	180000	0.00109			sp|Q9QZ23|NFU1_MOUSE	Nfu1	2	2	250000	0.000616			sp|Q64516|GLPK_MOUSE	Gk	2	2	150000	0.000602			sp|Q3UHK1|MYCT_MOUSE	Slc2a13	3	3	1300000	0.00243			sp|Q9D3A9|TTYH1_MOUSE	Ttyh1	3	3	2500000	0.00588			sp|Q8CBF3|EPHB1_MOUSE	Ephb1	2	3	1800000	0.00581		sp|P36993|PPM1B_MOUSE	Ppm1b
	sp|O88455|DHCR7_MOUSE	Dhcr7	1	2	130000	0.000767			sp|Q8VEH8|ERLEC_MOUSE	Erlec1	2	2	100000	0.000259			sp|Q8K201|KCT2_MOUSE	Kct2	2	2	140000	0.000561			sp|Q6P069|SORCN_MOUSE	Sri	3	3	690000	0.00131			sp|Q8BYR5|CAPS2_MOUSE	Cadps2	3	3	930000	0.00215			sp|P62342|SELT_MOUSE	Selenot	2	3	340000	0.0011		sp|Q9D967|MGDP1_MOUSE	Mdp1
	sp|P70245|EBP_MOUSE	Ebp	1	2	90000	0.000534			sp|Q8R0A7|K0513_MOUSE	Kiaa0513	2	2	250000	0.000627			sp|Q62421|SH3G3_MOUSE	Sh3gl3	2	2	140000	0.000567			sp|Q62442|VAMP1_MOUSE	Vamp1	2	21	55000000	0.11			sp|O35678|MGLL_MOUSE	Mgll	3	3	550000	0.00126			sp|Q9DB60|PGFS_MOUSE	Fam213b	2	3	2300000	0.00747		sp|P35282|RAB21_MOUSE	Rab21
	sp|O35316|SC6A6_MOUSE	Slc6a6	1	2	280000	0.00166			sp|Q8BGK5|S35F1_MOUSE	Slc35f1	2	2	440000	0.00111			sp|Q6ZQ18|EFR3B_MOUSE	Efr3b	2	2	700000	0.00279			sp|P63024|VAMP3_MOUSE	Vamp3	2	18	900000000	1.72			sp|Q61941|NNTM_MOUSE	Nnt	3	3	520000	0.0012			sp|Q01768|NDKB_MOUSE	Nme2	2	3	330000	0.00106		sp|Q6IR34|GPSM1_MOUSE	Gpsm1
	sp|Q6PER3|MARE3_MOUSE	Mapre3	1	2	140000	0.000837			sp|Q9D9V3|ECHD1_MOUSE	Echdc1	2	2	350000	0.000886			sp|Q922Y1|UBXN1_MOUSE	Ubxn1	2	2	160000	0.000652			sp|Q9WUC3|LY6H_MOUSE	Ly6h	2	15	2600000	0.00488			sp|P02469|LAMB1_MOUSE	Lamb1	3	3	320000	0.000733			sp|Q62186|SSRD_MOUSE	Ssr4	2	3	2100000	0.0068		sp|B1AZP2|DLGP4_MOUSE	Dlgap4
	sp|P48193|41_MOUSE	Epb41	1	2	1200000	0.0072			sp|Q8K201|KCT2_MOUSE	Kct2	2	2	230000	0.000583			sp|P07724|ALBU_MOUSE	Alb	2	2	220000	0.000891			sp|P62737|ACTA_MOUSE	Acta2	2	11	78000000	0.15			sp|O88736|DHB7_MOUSE	Hsd17b7	3	3	730000	0.00169			sp|P01669|KV3AH_MOUSE		2	3	560000	0.0018		sp|Q3TWI9|CSCL2_MOUSE	Tmem63b
	sp|P59808|SASH1_MOUSE	Sash1	1	2	200000	0.00117			sp|Q924N4|S12A6_MOUSE	Slc12a6	2	2	200000	0.000496			sp|Q07113|MPRI_MOUSE	Igf2r	2	2	93000	0.000367			sp|Q9D6P8|CALL3_MOUSE	Calml3	2	9	5300000	0.01			sp|Q8K009|AL1L2_MOUSE	Aldh1l2	3	3	370000	0.000848			sp|Q9CPT4|MYDGF_MOUSE	Mydgf	2	3	1800000	0.00565		sp|Q8CAA7|PGM2L_MOUSE	Pgm2l1
	sp|Q9DCT8|CRIP2_MOUSE	Crip2	1	1	260000	0.00154			sp|Q9Z0R6|ITSN2_MOUSE	Itsn2	2	2	520000	0.00131			sp|Q5DTL9|S4A10_MOUSE	Slc4a10	2	2	83000	0.00033			sp|P60766|CDC42_MOUSE	Cdc42	2	7	20000000	0.0376			sp|O35658|C1QBP_MOUSE	C1qbp	3	3	1700000	0.00398			sp|Q62159|RHOC_MOUSE	Rhoc	2	3	7600000	0.0242		sp|Q0V8T9|CTP5A_MOUSE	Cntnap5a
	sp|Q8R1B5|CPLX3_MOUSE	Cplx3	1	1	26000	0.000154			sp|Q9QZ88|VPS29_MOUSE	Vps29	2	2	590000	0.00147			sp|Q60631|GRB2_MOUSE	Grb2	2	2	240000	0.000952			sp|P84086|CPLX2_MOUSE	Cplx2	2	7	1400000	0.00259			sp|P35288|RAB23_MOUSE	Rab23	3	3	1100000	0.00259			sp|O08539|BIN1_MOUSE	Bin1	2	3	130000	0.000405		sp|Q61112|CAB45_MOUSE	Sdf4
	sp|Q62443|NPTX1_MOUSE	Nptx1	1	1	120000	0.000736			sp|Q3UM45|PP1R7_MOUSE	Ppp1r7	2	2	150000	0.000372			sp|Q8BLR2|CPNE4_MOUSE	Cpne4	2	2	230000	0.000899			sp|Q9CR51|VATG1_MOUSE	Atp6v1g1	2	6	11000000	0.0207			sp|Q9DB60|PGFS_MOUSE	Fam213b	3	3	6900000	0.016			sp|Q9CQU0|TXD12_MOUSE	Txndc12	2	3	630000	0.00201		sp|Q91WD5|NDUS2_MOUSE	Ndufs2
	sp|Q8BVI4|DHPR_MOUSE	Qdpr	1	1	61000	0.000359			sp|Q3UE37|UBE2Z_MOUSE	Ube2z	2	2	360000	0.000908			sp|Q9CQC6|BZW1_MOUSE	Bzw1	2	2	190000	0.000737			sp|P62492|RB11A_MOUSE	Rab11a	2	6	1300000	0.00245			sp|Q8C437|PEX5R_MOUSE	Pex5l	3	3	630000	0.00145			sp|Q9WV91|FPRP_MOUSE	Ptgfrn	2	3	590000	0.00189		sp|Q9DC50|OCTC_MOUSE	Crot
	sp|P83940|ELOC_MOUSE	Eloc	1	1	83000	0.000493			sp|Q8K2C9|HACD3_MOUSE	Hacd3	2	2	260000	0.000644			sp|Q8CAA7|PGM2L_MOUSE	Pgm2l1	2	2	170000	0.000667			tr|A0A0R4J1Z7|A0A0R4J1Z7_MOUSE	Sirpa	2	5	45000000	0.085			sp|P52795|EFNB1_MOUSE	Efnb1	3	3	1100000	0.00255			sp|Q7TN79|AKA7G_MOUSE	Akap7	2	3	870000	0.00277		sp|Q8VEL2|MTMRE_MOUSE	Mtmr14
	sp|Q99LD8|DDAH2_MOUSE	Ddah2	1	1	33000	0.000197			sp|Q8BR63|F177A_MOUSE	Fam177a1	2	2	2000000	0.00496			sp|P70205|PACR_MOUSE	Adcyap1r1	2	2	120000	0.000462			sp|P17879|HS71B_MOUSE	Hspa1b	2	5	68000000	0.13			sp|Q06890|CLUS_MOUSE	Clu	3	3	720000	0.00165			sp|Q9WUZ9|ENTP5_MOUSE	Entpd5	2	3	350000	0.00111		sp|Q8BH59|CMC1_MOUSE	Slc25a12
	sp|Q3TIR3|RIC8A_MOUSE	Ric8a	1	1	44000	0.000261			sp|Q922J3|CLIP1_MOUSE	Clip1	2	2	250000	0.000631			sp|P70245|EBP_MOUSE	Ebp	2	2	140000	0.000569			sp|Q9CR23|TMEM9_MOUSE	Tmem9	2	5	4200000	0.00791			sp|Q8BMP6|GCP60_MOUSE	Acbd3	3	3	250000	0.000578			sp|P03930|ATP8_MOUSE	Mtatp8	2	3	6000000	0.0192		sp|Q9Z2Y3|HOME1_MOUSE	Homer1
	sp|Q8BSY0|ASPH_MOUSE	Asph	1	1	170000	0.000985			tr|Q3ZAQ4|Q3ZAQ4_MOUSE	Atg9a	2	2	270000	0.000674			sp|Q9CWM4|PFD1_MOUSE	Pfdn1	2	2	260000	0.00102			sp|Q9D3D9|ATPD_MOUSE	Atp5d	2	5	9400000	0.0179			sp|Q4VAA2|CDV3_MOUSE	Cdv3	3	3	730000	0.00168			sp|P58771|TPM1_MOUSE	Tpm1	2	3	1300000	0.00402		sp|Q3TMX7|QSOX2_MOUSE	Qsox2
	tr|Q5FWJ7|Q5FWJ7_MOUSE	Vti1a	1	1	170000	0.000982			sp|P46978|STT3A_MOUSE	Stt3a	2	2	310000	0.000771			tr|D1FNM8|D1FNM8_MOUSE	Atp2b4	2	2	270000	0.00108			sp|Q9CQ92|FIS1_MOUSE	Fis1	2	5	5100000	0.00974			sp|O89053|COR1A_MOUSE	Coro1a	3	3	920000	0.00212			sp|Q3UMR5|MCU_MOUSE	Mcu	2	3	930000	0.00298		sp|A2ASS6|TITIN_MOUSE	Ttn
	sp|Q64322|NPDC1_MOUSE	Npdc1	1	1	43000	0.000257			sp|Q6TEK5|VKORL_MOUSE	Vkorc1l1	2	2	420000	0.00105			sp|Q03958|PFD6_MOUSE	Pfdn6	2	2	320000	0.00127			sp|P62746|RHOB_MOUSE	Rhob	2	5	1600000	0.00307			sp|P10637|TAU_MOUSE	Mapt	3	3	1000000	0.00236			tr|B8JJG7|B8JJG7_MOUSE	Tfg	2	3	5400000	0.0174		tr|A2MY50|A2MY50_MOUSE
	sp|Q9JIZ9|PLS3_MOUSE	Plscr3	1	1	19000	0.000114			sp|Q8BPG6|SUMF2_MOUSE	Sumf2	2	2	330000	0.000831			sp|Q60870|REEP5_MOUSE	Reep5	1	13	2700000	0.0106			tr|A0A1W2P882|A0A1W2P882_MOUSE	Atp2b1	2	4	5800000	0.0111			sp|Q6WVG3|KCD12_MOUSE	Kctd12	3	3	480000	0.00112			sp|O88653|LTOR3_MOUSE	Lamtor3	2	3	970000	0.0031		sp|Q91ZZ3|SYUB_MOUSE	Sncb
	sp|P30275|KCRU_MOUSE	Ckmt1	1	1	130000	0.000776			sp|Q9D1K7|CT027_MOUSE		2	2	1600000	0.00407			sp|Q9JKD3|SCAM5_MOUSE	Scamp5	1	6	1800000	0.00704			sp|P26883|FKB1A_MOUSE	Fkbp1a	2	4	7800000	0.0148			sp|Q9QZ23|NFU1_MOUSE	Nfu1	3	3	1200000	0.00278			sp|B1AXV0|FRS1L_MOUSE	Frrs1l	2	3	330000	0.00106		sp|O55100|SNG1_MOUSE	Syngr1
	sp|Q80XN0|BDH_MOUSE	Bdh1	1	1	36000	0.000214			sp|O08709|PRDX6_MOUSE	Prdx6	2	2	380000	0.000943			sp|O09044|SNP23_MOUSE	Snap23	1	5	1200000	0.00479			sp|Q9DCT8|CRIP2_MOUSE	Crip2	2	4	3600000	0.00693			sp|P70699|LYAG_MOUSE	Gaa	3	3	210000	0.000475			sp|Q9QZ88|VPS29_MOUSE	Vps29	2	3	940000	0.00299		sp|Q9D6P8|CALL3_MOUSE	Calml3
	sp|P62774|MTPN_MOUSE	Mtpn	1	1	480000	0.00287			sp|Q3UUG6|TBC24_MOUSE	Tbc1d24	2	2	180000	0.000443			sp|Q7TMM9|TBB2A_MOUSE	Tubb2a	1	4	3400000	0.0135			sp|Q71FD5|ZNRF2_MOUSE	Znrf2	2	4	1200000	0.00233			tr|Q3TU36|Q3TU36_MOUSE	Rap1gds1	3	3	380000	0.000874			sp|P61804|DAD1_MOUSE	Dad1	2	3	9300000	0.0297		sp|P63024|VAMP3_MOUSE	Vamp3
	sp|Q9CR26|VTA1_MOUSE	Vta1	1	1	130000	0.00076			sp|P70205|PACR_MOUSE	Adcyap1r1	2	2	130000	0.000321			sp|Q9CR23|TMEM9_MOUSE	Tmem9	1	3	360000	0.00142			tr|B8JJG7|B8JJG7_MOUSE	Tfg	2	4	5400000	0.0102			sp|Q811Q9|PCY1B_MOUSE	Pcyt1b	3	3	700000	0.00161			sp|Q8VE62|PAIP1_MOUSE	Paip1	2	3	400000	0.00129		sp|Q62442|VAMP1_MOUSE	Vamp1
	sp|P70404|IDHG1_MOUSE	Idh3g	1	1	19000	0.000112			sp|Q8CGF6|WDR47_MOUSE	Wdr47	2	2	170000	0.000421			sp|P62492|RB11A_MOUSE	Rab11a	1	3	140000	0.000542			sp|Q9JJV2|PROF2_MOUSE	Pfn2	2	4	3600000	0.00685			sp|Q8CFE4|SCYL2_MOUSE	Scyl2	3	3	1200000	0.00266			sp|O89053|COR1A_MOUSE	Coro1a	2	3	250000	0.0008		tr|E9QB01|E9QB01_MOUSE	Ncam1
	tr|Q3TD51|Q3TD51_MOUSE	Picalm	1	1	330000	0.00197			sp|Q9CQ26|STABP_MOUSE	Stambp	2	2	290000	0.000722			tr|G3X9J1|G3X9J1_MOUSE	Slc8a1	1	3	3100000	0.0122			sp|Q9D772|F219A_MOUSE	Fam219a	2	4	3600000	0.00692			sp|P70349|HINT1_MOUSE	Hint1	3	3	2300000	0.00529			sp|Q9DCT8|CRIP2_MOUSE	Crip2	2	2	880000	0.0028		sp|Q3V3I2|GNAT3_MOUSE	Gnat3
	sp|Q9CR20|IR3IP_MOUSE	Ier3ip1	1	1	140000	0.000846			sp|P34884|MIF_MOUSE	Mif	2	2	210000	0.000537			sp|Q8VBT0|TMX1_MOUSE	Tmx1	1	3	690000	0.00273			sp|Q9CPT4|MYDGF_MOUSE	Mydgf	2	4	2800000	0.00536			sp|P28738|KIF5C_MOUSE	Kif5c	3	3	360000	0.00082			sp|Q91Z38|TTC1_MOUSE	Ttc1	2	2	360000	0.00115		sp|P60766|CDC42_MOUSE	Cdc42
	sp|Q59J78|MIMIT_MOUSE	Ndufaf2	1	1	40000	0.000238			sp|Q8VEL2|MTMRE_MOUSE	Mtmr14	2	2	280000	0.000695			tr|Q99JZ4|Q99JZ4_MOUSE	Sar1a	1	3	7000000	0.0276			sp|Q91W97|HKDC1_MOUSE	Hkdc1	2	4	14000000	0.0264			sp|Q7TME0|PLPR4_MOUSE	Plppr4	3	3	930000	0.00214			sp|P10637|TAU_MOUSE	Mapt	2	2	540000	0.00174		IGH1M_MOUSE	Ighg1
	sp|O88848|ARL6_MOUSE	Arl6	1	1	60000	0.000353			sp|P17047|LAMP2_MOUSE	Lamp2	2	2	440000	0.00111			tr|A0A1W2P814|A0A1W2P814_MOUSE	Nrcam	1	3	1500000	0.0059			sp|Q99LC3|NDUAA_MOUSE	Ndufa10	2	3	880000	0.00168			sp|Q8BUV8|GP107_MOUSE	Gpr107	3	3	430000	0.000994			sp|P97798|NEO1_MOUSE	Neo1	2	2	260000	0.000818		sp|P84086|CPLX2_MOUSE	Cplx2
	sp|Q8CBF3|EPHB1_MOUSE	Ephb1	1	1	200000	0.00116			sp|Q9CQC6|BZW1_MOUSE	Bzw1	2	2	190000	0.000485			sp|P63213|GBG2_MOUSE	Gng2	1	3	34000000	0.14			sp|P05064|ALDOA_MOUSE	Aldoa	2	3	1300000	0.0024			sp|Q8R180|ERO1A_MOUSE	Ero1a	3	3	520000	0.00119			sp|Q8JZM4|DNER_MOUSE	Dner	2	2	600000	0.00192		sp|Q9QZI8|SERC1_MOUSE	Serinc1
	sp|Q9CWS0|DDAH1_MOUSE	Ddah1	1	1	91000	0.000536			sp|Q61527|ERBB4_MOUSE	Erbb4	2	2	300000	0.000765			tr|Q547J4|Q547J4_MOUSE	Mapt	1	3	1100000	0.00419			sp|Q6P5F7|TTYH3_MOUSE	Ttyh3	2	3	480000	0.000918			sp|P17439|GLCM_MOUSE	Gba	3	3	690000	0.00158			sp|Q8BY89|CTL2_MOUSE	Slc44a2	2	2	340000	0.00109		sp|P48455|PP2BC_MOUSE	Ppp3cc
	sp|P01647|KV5AE_MOUSE		1	1	59000	0.000349			sp|Q9WVA4|TAGL2_MOUSE	Tagln2	2	2	190000	0.000474			sp|Q0VF58|COJA1_MOUSE	Col19a1	1	3	8400000	0.0331			sp|Q7TNP2|2AAB_MOUSE	Ppp2r1b	2	3	660000	0.00126			sp|Q9QXV0|PCSK1_MOUSE	Pcsk1n	3	3	760000	0.00175			sp|Q8R2Y8|PTH2_MOUSE	Ptrh2	2	2	650000	0.00208		tr|Q6P1J1|Q6P1J1_MOUSE	Crmp1
	sp|Q5RKR3|ISLR2_MOUSE	Islr2	1	1	150000	0.000914			sp|Q922Y1|UBXN1_MOUSE	Ubxn1	2	2	290000	0.000717			sp|O35393|EFNB3_MOUSE	Efnb3	1	2	66000	0.000263			sp|Q91YP2|NEUL_MOUSE	Nln	2	3	340000	0.000654			sp|Q91WS0|CISD1_MOUSE	Cisd1	3	3	2000000	0.00453			sp|Q0KL01|UBX2B_MOUSE	Ubxn2b	2	2	250000	0.000801		tr|E0CYM8|E0CYM8_MOUSE	Sirpa
	sp|P48428|TBCA_MOUSE	Tbca	1	1	37000	0.000219			sp|Q9DCW4|ETFB_MOUSE	Etfb	2	2	350000	0.000878			tr|A0A1L1SUR7|A0A1L1SUR7_MOUSE	Picalm	1	2	190000	0.000741			tr|A0A0A6YWR2|A0A0A6YWR2_MOUSE	Ighg1	2	3	10000000	0.0194			sp|Q9CZD3|GARS_MOUSE	Gars	3	3	560000	0.00128			sp|Q9Z2X1|HNRPF_MOUSE	Hnrnpf	2	2	390000	0.00125		tr|Q8C7C3|Q8C7C3_MOUSE	Tpm3
	sp|P46425|GSTP2_MOUSE	Gstp2	1	1	130000	0.000748			sp|Q9JKZ2|SC5A3_MOUSE	Slc5a3	2	2	590000	0.00148			sp|O35127|C10_MOUSE	Grcc10	1	2	290000	0.00114			sp|Q9D0F3|LMAN1_MOUSE	Lman1	2	3	1200000	0.00233			sp|P45878|FKBP2_MOUSE	Fkbp2	3	3	1500000	0.00354			sp|Q8R1N4|NUDC3_MOUSE	Nudcd3	2	2	270000	0.000858		tr|Q6PGJ3|Q6PGJ3_MOUSE	L1cam
	sp|P61967|AP1S1_MOUSE	Ap1s1	1	1	39000	0.00023			sp|P50136|ODBA_MOUSE	Bckdha	2	2	470000	0.00119			sp|Q7TN79|AKA7G_MOUSE	Akap7	1	2	630000	0.0025			sp|Q99L43|CDS2_MOUSE	Cds2	2	3	7700000	0.0147			sp|A2TJV2|PALM3_MOUSE	Palm3	3	3	350000	0.000811			sp|P97952|SCN1B_MOUSE	Scn1b	2	2	1100000	0.0035		sp|O35682|MYADM_MOUSE	Myadm
	sp|Q8R4T1|CYS1_MOUSE	Cys1	1	1	14000	8.03e-05			sp|P47791|GSHR_MOUSE	Gsr	2	2	140000	0.000353			sp|P68373|TBA1C_MOUSE	Tuba1c	1	2	870000	0.00347			tr|Q8BXB3|Q8BXB3_MOUSE	Slc8a1	2	3	3800000	0.00722			sp|P97950|RB33A_MOUSE	Rab33a	3	3	1700000	0.00381			sp|Q63932|MP2K2_MOUSE	Map2k2	2	2	280000	0.000879		sp|P19536|COX5B_MOUSE	Cox5b
	tr|E9Q0N0|E9Q0N0_MOUSE	Itsn1	1	1	110000	0.000676			sp|P70677|CASP3_MOUSE	Casp3	2	2	470000	0.00117			tr|Q80VM5|Q80VM5_MOUSE	Dpp6	1	2	320000	0.00127			tr|Q6PD36|Q6PD36_MOUSE	Nptxr	2	3	6000000	0.0115			sp|Q63844|MK03_MOUSE	Mapk3	3	3	1100000	0.00243			sp|P57722|PCBP3_MOUSE	Pcbp3	2	2	230000	0.000729		sp|Q9D3D9|ATPD_MOUSE	Atp5d
	tr|Q3U2G2|Q3U2G2_MOUSE	Hspa4	1	1	57000	0.000334			sp|Q3UZV7|K132L_MOUSE		2	2	250000	0.000635			tr|Q8R5L1|Q8R5L1_MOUSE	C1qbp	1	2	230000	0.000902			sp|Q6RHR9|MAGI1_MOUSE	Magi1	2	3	510000	0.000972			sp|Q8BWF0|SSDH_MOUSE	Aldh5a1	3	3	1400000	0.00322			sp|Q8R1B5|CPLX3_MOUSE	Cplx3	2	2	450000	0.00145		tr|Q5SUH6|Q5SUH6_MOUSE	Clint1
	sp|Q9ERN0|SCAM2_MOUSE	Scamp2	1	1	51000	0.000303			sp|P97467|AMD_MOUSE	Pam	2	2	170000	0.000436			sp|Q8K2Q0|COMD9_MOUSE	Commd9	1	2	46000	0.000183			sp|Q78YZ6|SCOC_MOUSE	Scoc	2	3	2800000	0.00528			sp|Q8K2Q9|SHOT1_MOUSE	Shtn1	3	3	510000	0.00118			sp|Q9JM76|ARPC3_MOUSE	Arpc3	2	2	700000	0.00224		tr|Q14BH8|Q14BH8_MOUSE	Cacna2d1
	sp|P84309|ADCY5_MOUSE	Adcy5	1	1	36000	0.000214			sp|Q923L3|CSMD1_MOUSE	Csmd1	2	2	370000	0.000929			sp|Q8CBF3|EPHB1_MOUSE	Ephb1	1	2	1100000	0.00431			sp|Q6A051|ATRN1_MOUSE	Atrnl1	2	3	720000	0.00136			tr|G3X8R0|G3X8R0_MOUSE	Reep5	3	3	1200000	0.00286			sp|P63321|RALA_MOUSE	Rala	2	2	630000	0.00201		tr|G5E8R2|G5E8R2_MOUSE	Tpm1
	sp|Q9CQJ8|NDUB9_MOUSE	Ndufb9	1	1	23000	0.000134			sp|P31254|UBA1Y_MOUSE	Uba1y	2	2	450000	0.00112			sp|Q7TPB0|PLPR3_MOUSE	Plppr3	1	2	210000	0.000828			sp|Q8BG58|P4HTM_MOUSE	P4htm	2	3	490000	0.000925			tr|Q3U3W2|Q3U3W2_MOUSE	Tmem181a	3	3	1700000	0.00391			sp|O89023|TPP1_MOUSE	Tpp1	2	2	1500000	0.00492		sp|Q8R5J9|PRAF3_MOUSE	Arl6ip5
	sp|P54754|EPHB3_MOUSE	Ephb3	1	1	24000	0.00014			sp|Q9D428|GOG7B_MOUSE	GOLGA7B	2	2	330000	0.000837			sp|Q9D8B4|NDUAB_MOUSE	Ndufa11	1	2	530000	0.0021			sp|Q63932|MP2K2_MOUSE	Map2k2	2	3	480000	0.000923			sp|Q01768|NDKB_MOUSE	Nme2	3	3	970000	0.00224			sp|Q9D7E4|CS025_MOUSE		2	2	590000	0.00188		sp|Q9D2M8|UB2V2_MOUSE	Ube2v2
	sp|Q9QZ73|DCNL1_MOUSE	Dcun1d1	1	1	71000	0.000421			sp|Q62443|NPTX1_MOUSE	Nptx1	2	2	260000	0.000665			sp|Q9CR51|VATG1_MOUSE	Atp6v1g1	1	2	190000	0.000743			sp|Q9EQG7|ENPP5_MOUSE	Enpp5	2	3	600000	0.00115			sp|Q9R0Q9|MPU1_MOUSE	Mpdu1	3	3	490000	0.00113			sp|Q9JLM8|DCLK1_MOUSE	Dclk1	2	2	260000	0.000845		sp|P62746|RHOB_MOUSE	Rhob
	sp|Q8BHN0|PPM1L_MOUSE	Ppm1l	1	1	56000	0.000329			tr|Q3U3W2|Q3U3W2_MOUSE	Tmem181a	2	2	180000	0.000451			sp|P38060|HMGCL_MOUSE	Hmgcl	1	2	50000	0.000198			sp|Q9DBJ1|PGAM1_MOUSE	Pgam1	2	3	1100000	0.00208			sp|Q9Z0M5|LICH_MOUSE	Lipa	3	3	490000	0.00113			sp|P70423|CTR3_MOUSE	Slc7a3	2	2	430000	0.00137		sp|P48771|CX7A2_MOUSE	Cox7a2
	sp|Q9CQC7|NDUB4_MOUSE	Ndufb4	1	1	17000	9.92e-05			sp|Q8BIQ5|CSTF2_MOUSE	Cstf2	2	2	590000	0.00148			sp|Q9WV80|SNX1_MOUSE	Snx1	1	2	120000	0.000472			sp|Q9D2M8|UB2V2_MOUSE	Ube2v2	2	3	850000	0.00162			sp|P10126|EF1A1_MOUSE	Eef1a1	3	3	720000	0.00165			sp|P45591|COF2_MOUSE	Cfl2	2	2	200000	0.000642		sp|Q78YZ6|SCOC_MOUSE	Scoc
	sp|P70349|HINT1_MOUSE	Hint1	1	1	2300000	0.0136			sp|Q6ZQ18|EFR3B_MOUSE	Efr3b	2	2	1400000	0.00341			sp|P47955|RLA1_MOUSE	Rplp1	1	2	4700000	0.0187			sp|Q9ERE7|MESD_MOUSE	Mesdc2	2	3	740000	0.00141			sp|P70280|VAMP7_MOUSE	Vamp7	3	3	560000	0.0013			sp|P70670|NACAM_MOUSE	Naca	2	2	170000	0.000557		sp|Q9CPT4|MYDGF_MOUSE	Mydgf
	sp|O89017|LGMN_MOUSE	Lgmn	1	1	130000	0.000769			sp|Q60870|REEP5_MOUSE	Reep5	1	14	2800000	0.00708			sp|Q9D1Q4|DPM3_MOUSE	Dpm3	1	2	230000	0.000916			sp|Q8BWP8|B4GA1_MOUSE	B4gat1	2	3	1100000	0.00211			sp|P46978|STT3A_MOUSE	Stt3a	3	3	510000	0.00117			sp|Q9CRA5|GOLP3_MOUSE	Golph3	2	2	710000	0.00227		sp|O88441|MTX2_MOUSE	Mtx2
	sp|Q60648|SAP3_MOUSE	Gm2a	1	1	260000	0.00154			sp|Q9QZI8|SERC1_MOUSE	Serinc1	1	6	270000	0.000691			tr|G5E8R0|G5E8R0_MOUSE	Tpm1	1	2	520000	0.00207			sp|P48771|CX7A2_MOUSE	Cox7a2	2	3	2900000	0.00552			sp|Q9WV69|DEMA_MOUSE	Dmtn	3	3	490000	0.00113			sp|Q9WTX5|SKP1_MOUSE	Skp1	2	2	440000	0.0014		sp|Q8C0J2|A16L1_MOUSE	Atg16l1
	sp|Q8VI51|SORC3_MOUSE	Sorcs3	1	1	13000	7.98e-05			sp|O35682|MYADM_MOUSE	Myadm	1	3	490000	0.00123			tr|A0A075B5M4|A0A075B5M4_MOUSE	Igkv4-57-1	1	2	110000	0.000436			sp|Q7TN79|AKA7G_MOUSE	Akap7	2	3	1400000	0.00269			sp|Q8BUV3|GEPH_MOUSE	Gphn	3	3	400000	0.000928			sp|Q91VN4|MIC25_MOUSE	Chchd6	2	2	160000	0.000498		sp|Q9D772|F219A_MOUSE	Fam219a
	sp|Q9CQE5|RGS10_MOUSE	Rgs10	1	1	39000	0.000228			sp|Q6P5F7|TTYH3_MOUSE	Ttyh3	1	3	350000	0.000891			sp|P29595|NEDD8_MOUSE	Nedd8	1	2	1300000	0.00501			sp|Q9DB15|RM12_MOUSE	Mrpl12	2	3	1600000	0.003			sp|Q810C1|SLIK1_MOUSE	Slitrk1	3	3	560000	0.0013			sp|O88696|CLPP_MOUSE	Clpp	2	2	450000	0.00143		sp|Q4VAE3|TMM65_MOUSE	Tmem65
	sp|P21619|LMNB2_MOUSE	Lmnb2	1	1	26000	0.000153			sp|P68373|TBA1C_MOUSE	Tuba1c	1	3	2000000	0.00502			sp|P68372|TBB4B_MOUSE	Tubb4b	1	2	310000	0.00121			sp|Q6NZC7|S23IP_MOUSE	Sec23ip	2	3	310000	0.000589			sp|Q8R555|CRAC1_MOUSE	Crtac1	3	3	1000000	0.00233			sp|Q71M36|CSPG5_MOUSE	Cspg5	2	2	180000	0.000567		sp|Q8C996|TM163_MOUSE	Tmem163
	sp|Q80W54|FACE1_MOUSE	Zmpste24	1	1	49000	0.000293			sp|O08992|SDCB1_MOUSE	Sdcbp	1	3	150000	0.000382			sp|Q9QY33|TSN3_MOUSE	Tspan3	1	2	150000	0.000602			sp|P50153|GBG4_MOUSE	Gng4	2	3	4800000	0.0091			sp|P17751|TPIS_MOUSE	Tpi1	3	3	420000	0.000963			sp|Q9WTP7|KAD3_MOUSE	Ak3	2	2	330000	0.00106		sp|Q62186|SSRD_MOUSE	Ssr4
	sp|P20357|MTAP2_MOUSE	Map2	1	1	16000	9.35e-05			sp|Q7TMM9|TBB2A_MOUSE	Tubb2a	1	3	6400000	0.016			sp|Q922E4|PCY2_MOUSE	Pcyt2	1	2	110000	0.000431			sp|P03930|ATP8_MOUSE	Mtatp8	2	3	8400000	0.016			sp|Q5DQR4|STB5L_MOUSE	Stxbp5l	3	3	460000	0.00106			sp|Q8BYR5|CAPS2_MOUSE	Cadps2	2	2	540000	0.00172		sp|Q60605|MYL6_MOUSE	Myl6
	sp|Q9D819|IPYR_MOUSE	Ppa1	1	1	99000	0.000587			sp|Q9CR23|TMEM9_MOUSE	Tmem9	1	3	600000	0.00152			sp|Q0VBF8|STUM_MOUSE	Stum	1	2	170000	0.000676			sp|P46978|STT3A_MOUSE	Stt3a	2	3	770000	0.00147			sp|P62869|ELOB_MOUSE	Elob	3	3	550000	0.00127			sp|Q9Z1Z2|STRAP_MOUSE	Strap	2	2	280000	0.000909		sp|Q99KU0|VMP1_MOUSE	Vmp1
	sp|Q3THE2|ML12B_MOUSE	Myl12b	1	1	25000	0.000151			tr|A0A1W2P814|A0A1W2P814_MOUSE	Nrcam	1	3	2600000	0.00649			sp|Q61672|S29A2_MOUSE	Slc29a2	1	2	240000	0.000968			sp|P48455|PP2BC_MOUSE	Ppp3cc	2	3	5900000	0.0113			sp|Q00623|APOA1_MOUSE	Apoa1	3	3	970000	0.00223			tr|A0A0A6YWR2|A0A0A6YWR2_MOUSE	Ighg1	2	2	1100000	0.00347		tr|A0A0A6YY91|A0A0A6YY91_MOUSE	Ncam1
	sp|Q0VBF8|STUM_MOUSE	Stum	1	1	240000	0.00144			tr|Q99JZ4|Q99JZ4_MOUSE	Sar1a	1	3	11000000	0.0281			sp|Q8CH09|SUGP2_MOUSE	Sugp2	1	2	2200000	0.00866			sp|Q61772|EPHA7_MOUSE	Epha7	2	3	2500000	0.00475			sp|P63042|STMN4_MOUSE	Stmn4	3	3	810000	0.00186			sp|Q7TNP2|2AAB_MOUSE	Ppp2r1b	2	2	380000	0.00122		sp|P10833|RRAS_MOUSE	Rras
	sp|Q61337|BAD_MOUSE	Bad	1	1	31000	0.000181			sp|P00416|COX3_MOUSE	mt-Co3	1	3	130000	0.000324			sp|Q6P1B3|PIANP_MOUSE	Pianp	1	2	130000	0.000519			sp|P29387|GBB4_MOUSE	Gnb4	2	3	1200000	0.00233			sp|Q56A07|SCN2B_MOUSE	Scn2b	3	3	880000	0.00202			tr|A2AUK8|A2AUK8_MOUSE	Epb41l1	2	2	170000	0.000547		tr|Q8BXB3|Q8BXB3_MOUSE	Slc8a1
	sp|P14873|MAP1B_MOUSE	Map1b	1	1	34000	0.000204			sp|Q9D772|F219A_MOUSE	Fam219a	1	3	370000	0.000928			sp|Q9R0X4|ACOT9_MOUSE	Acot9	1	2	69000	0.000272			sp|Q8C1B7|SEP11_MOUSE	2017-09-11	2	2	130000	0.000242			sp|Q60648|SAP3_MOUSE	Gm2a	3	3	1500000	0.00349			sp|P48758|CBR1_MOUSE	Cbr1	2	2	570000	0.00181		sp|P50153|GBG4_MOUSE	Gng4
	sp|Q9CQ22|LTOR1_MOUSE	Lamtor1	1	1	3000000	0.018			sp|Q5SVR0|TBC9B_MOUSE	Tbc1d9b	1	3	260000	0.000649			sp|P48193|41_MOUSE	Epb41	1	2	720000	0.00286			sp|Q99K10|NLGN1_MOUSE	Nlgn1	2	2	570000	0.00109			sp|P35700|PRDX1_MOUSE	Prdx1	3	3	1400000	0.00319			sp|Q8CI61|BAG4_MOUSE	Bag4	2	2	210000	0.00067		sp|Q8R2Y8|PTH2_MOUSE	Ptrh2
	sp|Q9WV92|E41L3_MOUSE	Epb41l3	1	1	52000	0.000308			sp|Q9D593|VATE2_MOUSE	Atp6v1e2	1	3	1600000	0.00406			tr|Q3U1B1|Q3U1B1_MOUSE	Gnb1	1	2	2900000	0.0114			sp|Q60673|PTPRN_MOUSE	Ptprn	2	2	490000	0.000929			sp|Q8BLN5|ERG7_MOUSE	Lss	3	3	640000	0.00149			sp|P35288|RAB23_MOUSE	Rab23	2	2	700000	0.00223		sp|Q9DCS9|NDUBA_MOUSE	Ndufb10
	sp|Q9WTQ8|TIM23_MOUSE	Timm23	1	1	29000	0.000174			sp|Q0VF58|COJA1_MOUSE	Col19a1	1	3	22000000	0.0561			sp|Q6PD19|CJ076_MOUSE		1	2	94000	0.000373			sp|P57722|PCBP3_MOUSE	Pcbp3	2	2	610000	0.00115			sp|Q9WVG6|CARM1_MOUSE	Carm1	3	3	950000	0.0022			sp|P19157|GSTP1_MOUSE	Gstp1	2	2	310000	0.000979		sp|Q7TN79|AKA7G_MOUSE	Akap7
	sp|Q6IR34|GPSM1_MOUSE	Gpsm1	1	1	31000	0.00018			sp|P48193|41_MOUSE	Epb41	1	3	4200000	0.0106			sp|Q08093|CNN2_MOUSE	Cnn2	1	2	870000	0.00344			sp|Q9D7E4|CS025_MOUSE		2	2	620000	0.00118			sp|Q9WV98|TIM9_MOUSE	Timm9	3	3	1200000	0.00284			sp|Q9QXT0|CNPY2_MOUSE	Cnpy2	2	2	1500000	0.0049		sp|Q9WUK2|IF4H_MOUSE	Eif4h
	sp|Q5SX39|MYH4_MOUSE	Myh4	1	1	16000	9.46e-05			sp|Q9Z0F7|SYUG_MOUSE	Sncg	1	3	750000	0.00187			sp|P15920|VPP2_MOUSE	Atp6v0a2	1	2	1500000	0.00592			sp|Q9CRD0|OCAD1_MOUSE	Ociad1	2	2	750000	0.00143			sp|Q9WUC3|LY6H_MOUSE	Ly6h	2	13	2600000	0.00591			sp|P15105|GLNA_MOUSE	Glul	2	2	370000	0.00117		sp|Q9Z0M5|LICH_MOUSE	Lipa
	sp|P0C913|OCC1_MOUSE		1	1	70000	0.000417			sp|Q8BSY0|ASPH_MOUSE	Asph	1	2	580000	0.00146			sp|Q9D5S7|LRGUK_MOUSE	Lrguk	1	2	500000	0.00198			sp|P48758|CBR1_MOUSE	Cbr1	2	2	370000	0.000698			sp|Q9D6P8|CALL3_MOUSE	Calml3	2	11	5800000	0.0133			sp|Q9Z2Q6|SEPT5_MOUSE	2017-09-05	2	2	280000	0.000898		sp|P27601|GNA13_MOUSE	Gna13
	sp|Q80SW1|SAHH2_MOUSE	Ahcyl1	1	1	17000	9.91e-05			sp|O88746|TOM1_MOUSE	Tom1	1	2	190000	0.000483			sp|P62746|RHOB_MOUSE	Rhob	1	2	290000	0.00114			sp|Q99KJ8|DCTN2_MOUSE	Dctn2	2	2	440000	0.000836			sp|Q3V3I2|GNAT3_MOUSE	Gnat3	2	11	120000000	0.28			sp|Q6PGF7|EXOC8_MOUSE	Exoc8	2	2	390000	0.00126		sp|Q5M8N0|CNRP1_MOUSE	Cnrip1
	sp|Q80Y14|GLRX5_MOUSE	Glrx5	1	1	170000	0.00103			tr|Q3TML0|Q3TML0_MOUSE	Pdia6	1	2	3300000	0.00832			sp|Q9JKZ2|SC5A3_MOUSE	Slc5a3	1	2	570000	0.00227			sp|Q9ERN0|SCAM2_MOUSE	Scamp2	2	2	680000	0.00129			sp|P60766|CDC42_MOUSE	Cdc42	2	8	28000000	0.0635			sp|P46425|GSTP2_MOUSE	Gstp2	2	2	380000	0.0012		sp|Q8BYR5|CAPS2_MOUSE	Cadps2
	sp|Q8VHH7|ADCY3_MOUSE	Adcy3	1	1	46000	0.000269			tr|G3X9J1|G3X9J1_MOUSE	Slc8a1	1	2	2600000	0.00651			sp|P56382|ATP5E_MOUSE	Atp5e	1	2	660000	0.0026			sp|Q8BXA0|LRFN5_MOUSE	Lrfn5	2	2	370000	0.0007			sp|P62737|ACTA_MOUSE	Acta2	2	8	91000000	0.21			sp|Q99LI8|HGS_MOUSE	Hgs	2	2	470000	0.00151		sp|O35449|PRRT1_MOUSE	Prrt1
	sp|O35607|BMPR2_MOUSE	Bmpr2	1	1	27000	0.000159			sp|Q8VBT0|TMX1_MOUSE	Tmx1	1	2	990000	0.00248			tr|Q3TD51|Q3TD51_MOUSE	Picalm	1	1	330000	0.0013			sp|Q9CRA5|GOLP3_MOUSE	Golph3	2	2	960000	0.00182			sp|O88441|MTX2_MOUSE	Mtx2	2	6	670000	0.00155			sp|Q9JHU2|PALMD_MOUSE	Palmd	2	2	340000	0.00108		sp|Q9DB15|RM12_MOUSE	Mrpl12
	sp|P12849|KAP1_MOUSE	Prkar1b	1	1	55000	0.000322			sp|Q8CBF3|EPHB1_MOUSE	Ephb1	1	2	1600000	0.00391			sp|Q8BSY0|ASPH_MOUSE	Asph	1	1	160000	0.000634			tr|A2ANP1|A2ANP1_MOUSE	Fam219a	2	2	4100000	0.00773			sp|P84086|CPLX2_MOUSE	Cplx2	2	6	790000	0.00182			sp|Q9DBC7|KAP0_MOUSE	Prkar1a	2	2	290000	0.000919		sp|Q9WVA4|TAGL2_MOUSE	Tagln2
	tr|F7CUV7|F7CUV7_MOUSE	Epn2	1	1	41000	0.000241			sp|Q8BUV8|GP107_MOUSE	Gpr107	1	2	390000	0.000976			sp|P97783|AF1Q_MOUSE	Mllt11	1	1	60000	0.000237			sp|Q91VN4|MIC25_MOUSE	Chchd6	2	2	370000	0.000696			sp|P63213|GBG2_MOUSE	Gng2	2	6	68000000	0.16			sp|Q60605|MYL6_MOUSE	Myl6	2	2	170000	0.000544		tr|Q3TN93|Q3TN93_MOUSE	Ubqln1
	sp|Q9D6U8|F162A_MOUSE	Fam162a	1	1	35000	0.000207			tr|Q7M6W1|Q7M6W1_MOUSE	Rtn1	1	2	11000000	0.0274			tr|Q5FWJ7|Q5FWJ7_MOUSE	Vti1a	1	1	180000	0.000701			sp|Q6KAU4|MB12B_MOUSE	Mvb12b	2	2	480000	0.000921			sp|Q9CQ92|FIS1_MOUSE	Fis1	2	5	7000000	0.016			sp|Q8VHI3|OFUT2_MOUSE	Pofut2	2	2	240000	0.000756		sp|P63330|PP2AA_MOUSE	Ppp2ca
	sp|P70677|CASP3_MOUSE	Casp3	1	1	160000	0.000923			sp|Q7TN79|AKA7G_MOUSE	Akap7	1	2	930000	0.00235			tr|Q542N8|Q542N8_MOUSE	Palm	1	1	430000	0.00169			sp|Q8CBX0|CSC1_MOUSE	Tmem63c	2	2	360000	0.000691			sp|Q80TL4|PHF24_MOUSE	Phf24	2	5	620000	0.00142			sp|Q8CBX0|CSC1_MOUSE	Tmem63c	2	2	170000	0.000531		sp|Q99JI6|RAP1B_MOUSE	Rap1b
	sp|P04945|KV6AB_MOUSE		1	1	39000	0.000232			sp|Q8CA95|PDE10_MOUSE	Pde10a	1	2	41000	0.000102			sp|Q9CR26|VTA1_MOUSE	Vta1	1	1	110000	0.000452			sp|Q5M8N0|CNRP1_MOUSE	Cnrip1	2	2	1700000	0.00327			tr|A0A0R4J1Z7|A0A0R4J1Z7_MOUSE	Sirpa	2	4	23000000	0.0531			sp|P97333|NRP1_MOUSE	Nrp1	2	2	250000	0.000785		sp|Q9QZ88|VPS29_MOUSE	Vps29
	sp|P55302|AMRP_MOUSE	Lrpap1	1	1	130000	0.000795			sp|P47955|RLA1_MOUSE	Rplp1	1	2	6800000	0.0171			sp|Q3TIR3|RIC8A_MOUSE	Ric8a	1	1	67000	0.000266			sp|Q61081|CDC37_MOUSE	Cdc37	2	2	2200000	0.00412			tr|A0A1W2P882|A0A1W2P882_MOUSE	Atp2b1	2	4	3100000	0.00708			sp|Q7TSK2|SEZ6_MOUSE	Sez6	2	2	430000	0.00139		sp|Q9JM76|ARPC3_MOUSE	Arpc3
	sp|P53702|CCHL_MOUSE	Hccs	1	1	45000	0.000264			sp|Q9CR51|VATG1_MOUSE	Atp6v1g1	1	2	280000	0.000706			sp|Q8C1B7|SEP11_MOUSE	2017-09-11	1	1	50000	0.0002			sp|Q7TQI3|OTUB1_MOUSE	Otub1	2	2	380000	0.000727			sp|P17879|HS71B_MOUSE	Hspa1b	2	4	26000000	0.0606			sp|Q9WVK4|EHD1_MOUSE	Ehd1	2	2	460000	0.00146		sp|Q9JJZ4|UB2J1_MOUSE	Ube2j1
	sp|P68181|KAPCB_MOUSE	Prkacb	1	1	130000	0.000751			tr|Q80TH1|Q80TH1_MOUSE	Dlg3	1	2	290000	0.000723			sp|P62774|MTPN_MOUSE	Mtpn	1	1	760000	0.003			sp|Q5DTL9|S4A10_MOUSE	Slc4a10	2	2	130000	0.000239			sp|Q9D3D9|ATPD_MOUSE	Atp5d	2	4	8200000	0.0189			sp|Q80UP8|S20A2_MOUSE	Slc20a2	2	2	230000	0.000745		sp|P54830|PTN5_MOUSE	Ptpn5
	sp|Q3U1F9|PHAG1_MOUSE	Pag1	1	1	36000	0.000216			sp|Q91X58|ZFN2B_MOUSE	Zfand2b	1	2	200000	0.000512			sp|Q9WUA3|PFKAP_MOUSE	Pfkp	1	1	44000	0.000173			sp|P97952|SCN1B_MOUSE	Scn1b	2	2	1700000	0.00331			sp|Q9CR51|VATG1_MOUSE	Atp6v1g1	2	4	9200000	0.0213			sp|Q9D855|QCR7_MOUSE	Uqcrb	2	2	370000	0.00117		sp|Q9R1T4|SEPT6_MOUSE	2017-09-06
	sp|O35343|IMA3_MOUSE	Kpna4	1	1	23000	0.000138			sp|P29595|NEDD8_MOUSE	Nedd8	1	2	1100000	0.0028			sp|Q9JIQ3|DBLOH_MOUSE	Diablo	1	1	43000	0.000169			sp|Q8R404|MIC13_MOUSE	Mic13	2	2	350000	0.000658			tr|A0A140T8J4|A0A140T8J4_MOUSE	Hebp1	2	4	880000	0.00203			tr|E9Q137|E9Q137_MOUSE	Tex264	2	2	210000	0.000672		sp|O88746|TOM1_MOUSE	Tom1
	sp|Q91VW3|SH3L3_MOUSE	Sh3bgrl3	1	1	170000	0.00102			sp|Q9D964|GATM_MOUSE	Gatm	1	2	320000	0.000806			sp|Q9D7X3|DUS3_MOUSE	Dusp3	1	1	140000	0.000551			sp|Q6PGH2|JUPI2_MOUSE	Jpt2	2	2	330000	0.000633			tr|G5E8R2|G5E8R2_MOUSE	Tpm1	2	4	920000	0.00212			sp|Q3UX10|TBAL3_MOUSE	Tubal3	2	2	970000	0.00309		sp|O88848|ARL6_MOUSE	Arl6
	sp|P28652|KCC2B_MOUSE	Camk2b	1	1	48000	0.000282			sp|Q62186|SSRD_MOUSE	Ssr4	1	2	1100000	0.00267			sp|O88736|DHB7_MOUSE	Hsd17b7	1	1	88000	0.00035			sp|Q8CI61|BAG4_MOUSE	Bag4	2	2	260000	0.000488			sp|Q9CYN9|RENR_MOUSE	Atp6ap2	2	4	11000000	0.0246			sp|Q0VBF8|STUM_MOUSE	Stum	2	2	690000	0.00221		sp|O88602|CCG2_MOUSE	Cacng2
	sp|P20444|KPCA_MOUSE	Prkca	1	1	78000	0.000462			sp|Q8R1T1|CHMP7_MOUSE	Chmp7	1	2	190000	0.000477			sp|P27546|MAP4_MOUSE	Map4	1	1	130000	0.000508			sp|P40336|VP26A_MOUSE	Vps26a	2	2	540000	0.00103			sp|O09044|SNP23_MOUSE	Snap23	2	4	2600000	0.00607			sp|P14206|RSSA_MOUSE	Rpsa	2	2	660000	0.00211		sp|Q9CRA4|MSMO1_MOUSE	Msmo1
	sp|Q8BGT8|PHIPL_MOUSE	Phyhipl	1	1	86000	0.000507			sp|Q9D1L0|CHCH2_MOUSE	Chchd2	1	2	95000	0.000238			sp|O89023|TPP1_MOUSE	Tpp1	1	1	550000	0.00219			sp|Q66JS6|EI3JB_MOUSE	Eif3j2	2	2	190000	0.00036			sp|Q9JKV5|SCAM4_MOUSE	Scamp4	2	4	2800000	0.00637			sp|P61961|UFM1_MOUSE	Ufm1	2	2	550000	0.00174		sp|P21107|TPM3_MOUSE	Tpm3
	sp|Q8BUV3|GEPH_MOUSE	Gphn	1	1	39000	0.000233			tr|Q99M55|Q99M55_MOUSE	Atp6v0a1	1	2	98000	0.000247			tr|G5E8G3|G5E8G3_MOUSE	Opcml	1	1	730000	0.00291			sp|P05532|KIT_MOUSE	Kit	2	2	240000	0.000454			sp|Q4VAE3|TMM65_MOUSE	Tmem65	2	4	1400000	0.00322			sp|Q9CWK8|SNX2_MOUSE	Snx2	2	2	320000	0.00102		tr|G3X8R0|G3X8R0_MOUSE	Reep5
	sp|P63054|PCP4_MOUSE	Pcp4	1	1	36000	0.000212			sp|Q8BHL8|PSMF1_MOUSE	Psmf1	1	2	490000	0.00124			sp|Q9CR20|IR3IP_MOUSE	Ier3ip1	1	1	460000	0.00182			sp|Q9DB60|PGFS_MOUSE	Fam213b	2	2	1400000	0.00274			sp|Q91W97|HKDC1_MOUSE	Hkdc1	2	4	7700000	0.0178			sp|Q62443|NPTX1_MOUSE	Nptx1	2	2	590000	0.00188		sp|Q9JJU8|SH3L1_MOUSE	Sh3bgrl
	sp|P97370|AT1B3_MOUSE	Atp1b3	1	1	180000	0.00105			tr|Q9CPN9|Q9CPN9_MOUSE	2210010C04Rik	1	2	5200000	0.013			tr|Q3UJQ2|Q3UJQ2_MOUSE	Hmgcs1	1	1	45000	0.000177			sp|Q9JM76|ARPC3_MOUSE	Arpc3	2	2	790000	0.00151			sp|P62746|RHOB_MOUSE	Rhob	2	4	2500000	0.00588			sp|O35678|MGLL_MOUSE	Mgll	2	2	210000	0.000684		sp|O88653|LTOR3_MOUSE	Lamtor3
	sp|O55029|COPB2_MOUSE	Copb2	1	1	23000	0.000135			sp|Q9WV54|ASAH1_MOUSE	Asah1	1	2	300000	0.000743			sp|O88485|DC1I1_MOUSE	Dync1i1	1	1	32000	0.000127			tr|Q3TML0|Q3TML0_MOUSE	Pdia6	2	2	1400000	0.00264			sp|P26883|FKB1A_MOUSE	Fkbp1a	2	3	3500000	0.00817			sp|P49070|CAMLG_MOUSE	Camlg	2	2	380000	0.00121		sp|P63042|STMN4_MOUSE	Stmn4
	sp|Q9D1L9|LTOR5_MOUSE	Lamtor5	1	1	67000	0.000395			sp|P03930|ATP8_MOUSE	Mtatp8	1	2	6100000	0.0152			sp|P14873|MAP1B_MOUSE	Map1b	1	1	59000	0.000233			sp|P54923|ADPRH_MOUSE	Adprh	2	2	610000	0.00117			sp|P62342|SELT_MOUSE	Selenot	2	3	250000	0.000572			sp|Q99JI6|RAP1B_MOUSE	Rap1b	2	2	1300000	0.00426		sp|P48758|CBR1_MOUSE	Cbr1
	sp|Q99JT2|STK26_MOUSE	Stk26	1	1	49000	0.000288			sp|P50153|GBG4_MOUSE	Gng4	1	2	3100000	0.00786			sp|Q8R088|GLP3L_MOUSE	Golph3l	1	1	28000	0.000112			sp|P61087|UBE2K_MOUSE	Ube2k	2	2	1100000	0.00207			sp|Q99KU0|VMP1_MOUSE	Vmp1	2	3	670000	0.00156			sp|Q61036|PAK3_MOUSE	Pak3	2	2	130000	0.000416		sp|Q9Z2Q6|SEPT5_MOUSE	2017-09-05
	sp|Q9D892|ITPA_MOUSE	Itpa	1	1	63000	0.000372			sp|Q9CRA4|MSMO1_MOUSE	Msmo1	1	2	530000	0.00133			sp|P23198|CBX3_MOUSE	Cbx3	1	1	58000	0.000231			sp|Q8JZW4|CPNE5_MOUSE	Cpne5	2	2	360000	0.000689			sp|Q9CRB9|MIC19_MOUSE	Chchd3	2	3	460000	0.00107			sp|O55242|SGMR1_MOUSE	Sigmar1	2	2	230000	0.000739		sp|P63321|RALA_MOUSE	Rala
	sp|Q8JZM4|DNER_MOUSE	Dner	1	1	140000	0.000849			sp|Q9JKD3|SCAM5_MOUSE	Scamp5	1	2	620000	0.00155			sp|P0C913|OCC1_MOUSE		1	1	120000	0.000492			sp|P70349|HINT1_MOUSE	Hint1	2	2	2000000	0.00389			sp|O88602|CCG2_MOUSE	Cacng2	2	3	1100000	0.00249			sp|Q9JJZ4|UB2J1_MOUSE	Ube2j1	2	2	310000	0.000974		sp|O88736|DHB7_MOUSE	Hsd17b7
	sp|A2APX8|SCN1A_MOUSE	Scn1a	1	1	110000	0.000633			sp|Q08093|CNN2_MOUSE	Cnn2	1	2	1700000	0.00436			sp|Q3TAS6|EMC10_MOUSE	Emc10	1	1	200000	0.000784			sp|Q9QYG0|NDRG2_MOUSE	Ndrg2	2	2	560000	0.00106			tr|A0A0A6YY91|A0A0A6YY91_MOUSE	Ncam1	2	3	3400000	0.00784			sp|O88736|DHB7_MOUSE	Hsd17b7	2	2	260000	0.000825		sp|P81117|NUCB2_MOUSE	Nucb2
	sp|Q9DBL1|ACDSB_MOUSE	Acadsb	1	1	47000	0.000279			sp|P47802|MTX1_MOUSE	Mtx1	1	2	260000	0.000651			sp|Q91VW3|SH3L3_MOUSE	Sh3bgrl3	1	1	440000	0.00176			sp|Q8BY89|CTL2_MOUSE	Slc44a2	2	2	410000	0.000777			sp|Q6ZQ18|EFR3B_MOUSE	Efr3b	2	3	390000	0.000907			sp|Q9CQN6|TM14C_MOUSE	Tmem14c	2	2	830000	0.00265		sp|O88455|DHCR7_MOUSE	Dhcr7
	sp|Q9CPV4|GLOD4_MOUSE	Glod4	1	1	38000	0.000227			sp|Q4KWH5|PLCH1_MOUSE	Plch1	1	2	360000	0.000898			tr|E0CY16|E0CY16_MOUSE	Cadm1	1	1	140000	0.000543			sp|Q05186|RCN1_MOUSE	Rcn1	2	2	690000	0.00132			sp|P03930|ATP8_MOUSE	Mtatp8	2	3	7800000	0.018			sp|Q9JMA1|UBP14_MOUSE	Usp14	2	2	180000	0.000578		sp|Q80U63|MFN2_MOUSE	Mfn2
	sp|P05532|KIT_MOUSE	Kit	1	1	33000	0.000196			tr|Q3U1B1|Q3U1B1_MOUSE	Gnb1	1	2	3600000	0.00902			sp|Q8BWM0|PGES2_MOUSE	Ptges2	1	1	57000	0.000227			sp|Q8CHC4|SYNJ1_MOUSE	Synj1	2	2	350000	0.000669			sp|Q8VBT0|TMX1_MOUSE	Tmx1	2	3	2300000	0.00539			sp|O35607|BMPR2_MOUSE	Bmpr2	2	2	390000	0.00124		sp|Q62283|TSN7_MOUSE	Tspan7
	tr|Q3TU36|Q3TU36_MOUSE	Rap1gds1	1	1	540000	0.00318			sp|P49070|CAMLG_MOUSE	Camlg	1	2	1700000	0.00436			sp|Q8R404|MIC13_MOUSE	Mic13	1	1	95000	0.000377			sp|Q9CQZ1|HSBP1_MOUSE	Hsbp1	2	2	350000	0.000672			sp|Q3UX10|TBAL3_MOUSE	Tubal3	2	3	2700000	0.00613			sp|P05201|AATC_MOUSE	Got1	2	2	330000	0.00107		sp|Q9D1K7|CT027_MOUSE
	sp|Q91VM9|IPYR2_MOUSE	Ppa2	1	1	33000	0.000194			sp|Q8BI08|MAL2_MOUSE	Mal2	1	2	4100000	0.0103			sp|Q9QX60|DGUOK_MOUSE	Dguok	1	1	72000	0.000285			sp|O88736|DHB7_MOUSE	Hsd17b7	2	2	940000	0.00179			sp|Q9CR16|PPID_MOUSE	Ppid	2	3	280000	0.000642			sp|Q8BVQ5|PPME1_MOUSE	Ppme1	2	2	550000	0.00176		sp|Q9WV69|DEMA_MOUSE	Dmtn
	sp|Q9EQJ9|MAGI3_MOUSE	Magi3	1	1	25000	0.000147			tr|Q3UJQ2|Q3UJQ2_MOUSE	Hmgcs1	1	1	85000	0.000214			sp|O88544|CSN4_MOUSE	Cops4	1	1	55000	0.000218			sp|Q8BWF0|SSDH_MOUSE	Aldh5a1	2	2	410000	0.000786			sp|Q9QZ88|VPS29_MOUSE	Vps29	2	3	890000	0.00205			sp|Q9CPW4|ARPC5_MOUSE	Arpc5	2	2	940000	0.00301		tr|Q58E70|Q58E70_MOUSE	Tpm3
	sp|Q8VCS3|XYLK_MOUSE	Fam20b	1	1	43000	0.000256			tr|B7ZWP1|B7ZWP1_MOUSE	Fam219a	1	1	55000	0.000138			sp|Q9WV91|FPRP_MOUSE	Ptgfrn	1	1	55000	0.000216			sp|P14824|ANXA6_MOUSE	Anxa6	2	2	400000	0.000769			sp|P48455|PP2BC_MOUSE	Ppp3cc	2	3	7100000	0.0164			sp|Q8BJU0|SGTA_MOUSE	Sgta	2	2	450000	0.00145		sp|Q8R1B5|CPLX3_MOUSE	Cplx3
	sp|Q9QYF1|RDH11_MOUSE	Rdh11	1	1	38000	0.000224			sp|Q9CR26|VTA1_MOUSE	Vta1	1	1	190000	0.000475			sp|P22892|AP1G1_MOUSE	Ap1g1	1	1	130000	0.000535			sp|A2ALU4|SHRM2_MOUSE	Shroom2	2	2	290000	0.000549			sp|Q05816|FABP5_MOUSE	Fabp5	2	3	4700000	0.0109			sp|Q9EPR4|S23A2_MOUSE	Slc23a2	2	2	98000	0.000312		sp|P19157|GSTP1_MOUSE	Gstp1
	sp|P68368|TBA4A_MOUSE	Tuba4a	1	1	51000	0.000301			tr|Q3TD51|Q3TD51_MOUSE	Picalm	1	1	880000	0.00221			sp|P0C0A3|CHMP6_MOUSE	Chmp6	1	1	280000	0.0011			sp|P29533|VCAM1_MOUSE	Vcam1	2	2	710000	0.00135			sp|P97370|AT1B3_MOUSE	Atp1b3	2	3	2800000	0.00653			tr|Q4VA93|Q4VA93_MOUSE	Prkca	2	2	630000	0.002		sp|Q3UPH1|PRRC1_MOUSE	Prrc1
	sp|Q8BGH7|C42S2_MOUSE	Cdc42se2	1	1	59000	0.000349			tr|Q5FWJ7|Q5FWJ7_MOUSE	Vti1a	1	1	200000	0.00051			sp|Q80W54|FACE1_MOUSE	Zmpste24	1	1	120000	0.000484			sp|O35153|BET1L_MOUSE	Bet1l	2	2	300000	0.000572			sp|P58771|TPM1_MOUSE	Tpm1	2	3	1300000	0.003			sp|Q9D0R8|LSM12_MOUSE	Lsm12	2	2	360000	0.00116		sp|Q9D898|ARP5L_MOUSE	Arpc5l
	sp|Q99J99|THTM_MOUSE	Mpst	1	1	32000	0.000191			sp|P49769|PSN1_MOUSE	Psen1	1	1	98000	0.000247			sp|Q91VN4|MIC25_MOUSE	Chchd6	1	1	84000	0.000332			sp|Q99KU0|VMP1_MOUSE	Vmp1	2	2	630000	0.00119			sp|P50153|GBG4_MOUSE	Gng4	2	3	5500000	0.0128			sp|P52800|EFNB2_MOUSE	Efnb2	2	2	160000	0.000498		tr|A0A140T8J4|A0A140T8J4_MOUSE	Hebp1
	sp|Q9ET43|CLD12_MOUSE	Cldn12	1	1	110000	0.000644			sp|P15105|GLNA_MOUSE	Glul	1	1	210000	0.000516			tr|B7ZNF6|B7ZNF6_MOUSE	Ctnnd2	1	1	390000	0.00154			sp|Q8K064|F174B_MOUSE	Fam174b	2	2	670000	0.00127			sp|Q80SW1|SAHH2_MOUSE	Ahcyl1	2	3	470000	0.00109			sp|D3YVF0|AKAP5_MOUSE	Akap5	2	2	560000	0.00178		sp|P61924|COPZ1_MOUSE	Copz1
	sp|Q8BJU2|TSN9_MOUSE	Tspan9	1	1	46000	0.000273			sp|P40124|CAP1_MOUSE	Cap1	1	1	190000	0.000468			sp|Q9DBF1|AL7A1_MOUSE	Aldh7a1	1	1	39000	0.000153			sp|Q9Z1Z2|STRAP_MOUSE	Strap	2	2	380000	0.000731			sp|Q6GV12|KDSR_MOUSE	Kdsr	2	3	490000	0.00114			sp|Q9CQI3|GMFB_MOUSE	Gmfb	2	2	540000	0.00171		sp|Q9D358|PPAC_MOUSE	Acp1
	sp|P59108|CPNE2_MOUSE	Cpne2	1	1	12000	6.87e-05			sp|P27546|MAP4_MOUSE	Map4	1	1	170000	0.000429			sp|P80316|TCPE_MOUSE	Cct5	1	1	150000	0.0006			tr|Q4VA93|Q4VA93_MOUSE	Prkca	2	2	640000	0.00122			sp|P97823|LYPA1_MOUSE	Lypla1	2	3	420000	0.000973			sp|Q9WTR1|TRPV2_MOUSE	Trpv2	2	2	250000	0.000785		sp|P61759|PFD3_MOUSE	Vbp1
	sp|P58044|IDI1_MOUSE	Idi1	1	1	38000	0.000222			tr|E9Q0N0|E9Q0N0_MOUSE	Itsn1	1	1	320000	0.000803			sp|Q64455|PTPRJ_MOUSE	Ptprj	1	1	55000	0.000218			sp|Q9DBP5|KCY_MOUSE	Cmpk1	2	2	290000	0.000543			sp|P11983|TCPA_MOUSE	Tcp1	2	3	520000	0.00119			sp|P11798|KCC2A_MOUSE	Camk2a	2	2	500000	0.00159		sp|Q8CHS8|VP37A_MOUSE	Vps37a
	sp|Q02248|CTNB1_MOUSE	Ctnnb1	1	1	40000	0.000238			sp|P62774|MTPN_MOUSE	Mtpn	1	1	1200000	0.00311			sp|P17183|ENOG_MOUSE	Eno2	1	1	120000	0.000459			sp|Q3URE9|LIGO2_MOUSE	Lingo2	2	2	500000	0.000948			sp|Q3UZP4|SVIP_MOUSE	Svip	2	3	390000	0.000897			sp|Q8BWP8|B4GA1_MOUSE	B4gat1	2	2	690000	0.00219		sp|Q8BWP8|B4GA1_MOUSE	B4gat1
	sp|Q8CGF6|WDR47_MOUSE	Wdr47	1	1	45000	0.000264			sp|Q8R1B5|CPLX3_MOUSE	Cplx3	1	1	180000	0.000462			sp|P19157|GSTP1_MOUSE	Gstp1	1	1	85000	0.000338			sp|P17439|GLCM_MOUSE	Gba	2	2	680000	0.00129			sp|P04370|MBP_MOUSE	Mbp	2	2	570000	0.00131			sp|Q9R0Q9|MPU1_MOUSE	Mpdu1	2	2	280000	0.000891		sp|Q9WTQ8|TIM23_MOUSE	Timm23
	sp|Q9DBG9|TX1B3_MOUSE	Tax1bp3	1	1	53000	0.000314			sp|Q80Y14|GLRX5_MOUSE	Glrx5	1	1	550000	0.00137			sp|P84309|ADCY5_MOUSE	Adcy5	1	1	37000	0.000145			sp|Q8BLQ7|CTR4_MOUSE	Slc7a4	2	2	800000	0.00151			sp|Q9DCT8|CRIP2_MOUSE	Crip2	2	2	1600000	0.00371			sp|Q8BWM0|PGES2_MOUSE	Ptges2	2	2	220000	0.000703		sp|Q7TPB0|PLPR3_MOUSE	Plppr3
	sp|P63321|RALA_MOUSE	Rala	1	1	230000	0.00138			sp|P70670|NACAM_MOUSE	Naca	1	1	160000	0.000406			sp|Q8R4S0|PP14C_MOUSE	Ppp1r14c	1	1	390000	0.00155			sp|P62500|T22D1_MOUSE	Tsc22d1	2	2	1200000	0.00237			sp|Q8R105|VP37C_MOUSE	Vps37c	2	2	1000000	0.00234			sp|Q9WV98|TIM9_MOUSE	Timm9	2	2	280000	0.000897		sp|Q8K0C4|CP51A_MOUSE	Cyp51a1
	sp|Q8K4R4|PITC1_MOUSE	Pitpnc1	1	1	32000	0.000191			sp|P0C0A3|CHMP6_MOUSE	Chmp6	1	1	560000	0.00141			sp|Q925E7|2ABD_MOUSE	Ppp2r2d	1	1	29000	0.000115			sp|Q9QYK7|RNF11_MOUSE	Rnf11	2	2	1100000	0.00201			sp|Q9CRA5|GOLP3_MOUSE	Golph3	2	2	790000	0.00182			sp|Q8K0C4|CP51A_MOUSE	Cyp51a1	2	2	150000	0.000472		tr|Q3UH83|Q3UH83_MOUSE	Gucy1a2
	sp|B1ARW8|CA122_MOUSE		1	1	260000	0.00152			sp|Q3TIR3|RIC8A_MOUSE	Ric8a	1	1	120000	0.000313			sp|O54962|BAF_MOUSE	Banf1	1	1	210000	0.00085			sp|P48320|DCE2_MOUSE	Gad2	2	2	480000	0.000905			tr|Q3TML0|Q3TML0_MOUSE	Pdia6	2	2	2000000	0.00457			sp|Q80XN0|BDH_MOUSE	Bdh1	2	2	250000	0.000798		sp|Q8C437|PEX5R_MOUSE	Pex5l
	sp|P80316|TCPE_MOUSE	Cct5	1	1	32000	0.000188			sp|O88736|DHB7_MOUSE	Hsd17b7	1	1	200000	0.000508			sp|Q9Z2I2|FKB1B_MOUSE	Fkbp1b	1	1	74000	0.000293			sp|Q8BYR5|CAPS2_MOUSE	Cadps2	2	2	800000	0.00152			tr|A0A0A6YWR2|A0A0A6YWR2_MOUSE	Ighg1	2	2	2200000	0.00502			sp|Q9QYK7|RNF11_MOUSE	Rnf11	2	2	760000	0.00242		sp|Q9R0Q9|MPU1_MOUSE	Mpdu1
	sp|Q3TAS6|EMC10_MOUSE	Emc10	1	1	50000	0.000298			sp|Q3UV70|PDP1_MOUSE	Pdp1	1	1	59000	0.000149			sp|Q9QZ23|NFU1_MOUSE	Nfu1	1	1	240000	0.000939			sp|Q8BU31|RAP2C_MOUSE	Rap2c	2	2	390000	0.000748			sp|Q04736|YES_MOUSE	Yes1	2	2	160000	0.000372			sp|Q9QX60|DGUOK_MOUSE	Dguok	2	2	240000	0.000755		sp|Q6ZQ18|EFR3B_MOUSE	Efr3b
	sp|Q61249|IGBP1_MOUSE	Igbp1	1	1	73000	0.00043			sp|Q9D880|TIM50_MOUSE	Timm50	1	1	220000	0.000544			sp|Q6P5F7|TTYH3_MOUSE	Ttyh3	1	1	210000	0.000816			sp|P70297|STAM1_MOUSE	Stam	2	2	980000	0.00186			tr|A2ANP1|A2ANP1_MOUSE	Fam219a	2	2	3700000	0.00858			sp|Q01853|TERA_MOUSE	Vcp	2	2	240000	0.000761		sp|Q8R4F1|NTNG2_MOUSE	Ntng2
	sp|Q148V7|K1468_MOUSE	Kiaa1468	1	1	140000	0.000808			sp|Q9WUA3|PFKAP_MOUSE	Pfkp	1	1	100000	0.000253			sp|Q9CPV4|GLOD4_MOUSE	Glod4	1	1	82000	0.000325			sp|Q9JJZ4|UB2J1_MOUSE	Ube2j1	2	2	530000	0.00101			sp|P97952|SCN1B_MOUSE	Scn1b	2	2	1600000	0.00367			sp|Q9CPS6|HINT3_MOUSE	Hint3	2	2	380000	0.00122		sp|Q921G7|ETFD_MOUSE	Etfdh
	sp|Q8VEH8|ERLEC_MOUSE	Erlec1	1	1	70000	0.000414			sp|Q8VDL4|ADPGK_MOUSE	Adpgk	1	1	62000	0.000155			sp|P17439|GLCM_MOUSE	Gba	1	1	160000	0.000653			sp|Q9D3A9|TTYH1_MOUSE	Ttyh1	2	2	2900000	0.00554			sp|Q9D7E4|CS025_MOUSE		2	2	610000	0.00142			sp|Q8BIW1|PRUN1_MOUSE	Prune1	2	2	140000	0.000435		sp|Q8C561|LMBD2_MOUSE	Lmbrd2
	sp|O55033|NCK2_MOUSE	Nck2	1	1	20000	0.00012			sp|Q9QZ73|DCNL1_MOUSE	Dcun1d1	1	1	150000	0.000378			sp|Q9CPU4|MGST3_MOUSE	Mgst3	1	1	50000	0.000197			sp|Q8BHH2|RAB9B_MOUSE	Rab9b	2	2	1400000	0.00273			sp|Q9Z1Z2|STRAP_MOUSE	Strap	2	2	300000	0.000686			sp|Q641P0|ARP3B_MOUSE	Actr3b	2	2	150000	0.000477		sp|Q8VDL4|ADPGK_MOUSE	Adpgk
	sp|P40336|VP26A_MOUSE	Vps26a	1	1	37000	0.000216			sp|Q8VBW1|SC6A8_MOUSE	Slc6a8	1	1	150000	0.000367			sp|Q8BGH7|C42S2_MOUSE	Cdc42se2	1	1	110000	0.000422			sp|P11798|KCC2A_MOUSE	Camk2a	2	2	830000	0.00159			sp|Q78JW9|UBFD1_MOUSE	Ubfd1	2	2	680000	0.00158			sp|Q9CQH3|NDUB5_MOUSE	Ndufb5	2	2	430000	0.00138		tr|Q3TY98|Q3TY98_MOUSE	Atp6v0a1
	sp|Q9QYS2|GRM3_MOUSE	Grm3	1	1	27000	0.000159			sp|P02469|LAMB1_MOUSE	Lamb1	1	1	31000	7.89e-05			tr|D3Z742|D3Z742_MOUSE	Mb21d2	1	1	46000	0.000184			sp|Q3UX10|TBAL3_MOUSE	Tubal3	2	2	1500000	0.00281			sp|O35737|HNRH1_MOUSE	Hnrnph1	2	2	650000	0.00151			sp|P11404|FABPH_MOUSE	Fabp3	2	2	730000	0.00232		sp|Q8BY89|CTL2_MOUSE	Slc44a2
	sp|Q9D8B4|NDUAB_MOUSE	Ndufa11	1	1	180000	0.00105			sp|Q80W54|FACE1_MOUSE	Zmpste24	1	1	120000	0.000298			sp|Q9CQ22|LTOR1_MOUSE	Lamtor1	1	1	170000	0.000661			sp|Q7TSK2|SEZ6_MOUSE	Sez6	2	2	600000	0.00114			sp|P57722|PCBP3_MOUSE	Pcbp3	2	2	380000	0.000876			tr|Q3URQ4|Q3URQ4_MOUSE	Fam8a1	2	2	180000	0.000578		sp|Q8BTX9|HSDL1_MOUSE	Hsdl1
	sp|Q03173|ENAH_MOUSE	Enah	1	1	41000	0.00024			sp|P97370|AT1B3_MOUSE	Atp1b3	1	1	670000	0.00168			sp|O55242|SGMR1_MOUSE	Sigmar1	1	1	46000	0.000182			sp|P70280|VAMP7_MOUSE	Vamp7	2	2	490000	0.000929			sp|Q5M8N0|CNRP1_MOUSE	Cnrip1	2	2	1100000	0.00265			sp|Q91VM9|IPYR2_MOUSE	Ppa2	2	2	1300000	0.00427		sp|Q80X50|UBP2L_MOUSE	Ubap2l
	tr|B1AWN6|B1AWN6_MOUSE	Scn2a	1	1	31000	0.000182			sp|Q91VW3|SH3L3_MOUSE	Sh3bgrl3	1	1	650000	0.00163			sp|P49945|FRIL2_MOUSE	Ftl2	1	1	39000	0.000156			sp|P63037|DNJA1_MOUSE	Dnaja1	2	2	570000	0.00109			sp|Q8CBX0|CSC1_MOUSE	Tmem63c	2	2	230000	0.000531			sp|Q9CX00|IST1_MOUSE	Ist1	2	2	600000	0.00191		sp|P28571|SC6A9_MOUSE	Slc6a9
	sp|O09126|SEM4D_MOUSE	Sema4d	1	1	62000	0.000367			sp|P84309|ADCY5_MOUSE	Adcy5	1	1	88000	0.000221			sp|Q8VCS3|XYLK_MOUSE	Fam20b	1	1	31000	0.000122			sp|Q61337|BAD_MOUSE	Bad	2	2	440000	0.000835			sp|Q8BXA0|LRFN5_MOUSE	Lrfn5	2	2	190000	0.000428			tr|D3Z183|D3Z183_MOUSE	Mfsd6	2	2	130000	0.000402		sp|Q9EQG7|ENPP5_MOUSE	Enpp5
	sp|Q8BWM0|PGES2_MOUSE	Ptges2	1	1	32000	0.000187			sp|Q9WVQ1|MAGI2_MOUSE	Magi2	1	1	160000	0.000408			sp|Q9CW79|GOGA1_MOUSE	Golga1	1	1	53000	0.000208			sp|Q8BKC5|IPO5_MOUSE	Ipo5	2	2	180000	0.000346			sp|Q8R2Y8|PTH2_MOUSE	Ptrh2	2	2	610000	0.00141			sp|Q9WVA4|TAGL2_MOUSE	Tagln2	2	2	370000	0.00119		sp|P70677|CASP3_MOUSE	Casp3
	sp|Q9D855|QCR7_MOUSE	Uqcrb	1	1	49000	0.000289			sp|Q8R0J7|VP37B_MOUSE	Vps37b	1	1	110000	0.000287			tr|D4N6R6|D4N6R6_MUSMC	Hbbt1	1	1	79000	0.000312			sp|P47809|MP2K4_MOUSE	Map2k4	2	2	4100000	0.00776			sp|Q80XN0|BDH_MOUSE	Bdh1	2	2	350000	0.000814			sp|Q99KV1|DJB11_MOUSE	Dnajb11	2	2	13000000	0.0405		sp|Q91VM9|IPYR2_MOUSE	Ppa2
	sp|O88587|COMT_MOUSE	Comt	1	1	65000	0.000382			sp|Q9D819|IPYR_MOUSE	Ppa1	1	1	220000	0.00056			sp|Q9CWG9|BL1S2_MOUSE	Bloc1s2	1	1	76000	0.000301			sp|P97370|AT1B3_MOUSE	Atp1b3	2	2	3100000	0.00592			sp|P14206|RSSA_MOUSE	Rpsa	2	2	1300000	0.003			sp|Q8BWG8|ARRB1_MOUSE	Arrb1	2	2	180000	0.000582		sp|Q9CPS6|HINT3_MOUSE	Hint3
	sp|P59759|MKL2_MOUSE	Mkl2	1	1	15000	8.65e-05			tr|Q8R5L1|Q8R5L1_MOUSE	C1qbp	1	1	230000	0.000566			sp|Q4KMM3|OXR1_MOUSE	Oxr1	1	1	97000	0.000385			sp|O88809|DCX_MOUSE	Dcx	2	2	680000	0.00129			sp|Q91VN4|MIC25_MOUSE	Chchd6	2	2	340000	0.000789			sp|P97370|AT1B3_MOUSE	Atp1b3	2	2	830000	0.00266		sp|Q8BH58|TIPRL_MOUSE	Tiprl
	sp|Q9WUA3|PFKAP_MOUSE	Pfkp	1	1	34000	0.000201			sp|Q9CQU5|ZWINT_MOUSE	Zwint	1	1	130000	0.000323			sp|Q99LC3|NDUAA_MOUSE	Ndufa10	1	1	54000	0.000213			sp|Q64010|CRK_MOUSE	Crk	2	2	370000	0.000707			sp|Q99JX3|GORS2_MOUSE	Gorasp2	2	2	1100000	0.00263			sp|Q8BGK5|S35F1_MOUSE	Slc35f1	2	2	1100000	0.00364		sp|Q78T54|VMA21_MOUSE	Vma21
	sp|O35621|PMM1_MOUSE	Pmm1	1	1	33000	0.000196			sp|Q8R404|MIC13_MOUSE	Mic13	1	1	100000	0.000254			tr|Q3TA69|Q3TA69_MOUSE	Rap1gds1	1	1	2200000	0.00884			sp|Q9WUZ9|ENTP5_MOUSE	Entpd5	2	2	120000	0.00022			tr|A2RSX9|A2RSX9_MOUSE	Arfip1	2	2	480000	0.0011			sp|P54830|PTN5_MOUSE	Ptpn5	2	2	160000	0.000504		sp|P07724|ALBU_MOUSE	Alb
	sp|Q8CH72|TRI32_MOUSE	Trim32	1	1	28000	0.000168			sp|Q91X78|ERLN1_MOUSE	Erlin1	1	1	660000	0.00165			sp|Q9CQE5|RGS10_MOUSE	Rgs10	1	1	61000	0.00024			sp|P17751|TPIS_MOUSE	Tpi1	2	2	890000	0.0017			sp|O88746|TOM1_MOUSE	Tom1	2	2	290000	0.000668			sp|O88952|LIN7C_MOUSE	Lin7c	2	2	570000	0.00183		sp|P31254|UBA1Y_MOUSE	Uba1y
	tr|D3YYH0|D3YYH0_MOUSE	Pex5l	1	1	17000	9.82e-05			sp|Q0KL01|UBX2B_MOUSE	Ubxn2b	1	1	96000	0.000242			sp|Q9D920|BORC5_MOUSE	Borcs5	1	1	42000	0.000165			sp|Q66L44|CBARP_MOUSE	Cbarp	2	2	400000	0.000769			sp|Q8R404|MIC13_MOUSE	Mic13	2	2	270000	0.000612			sp|Q9DBL9|ABHD5_MOUSE	Abhd5	2	2	180000	0.000586		sp|Q0KL01|UBX2B_MOUSE	Ubxn2b
	sp|Q6A051|ATRN1_MOUSE	Atrnl1	1	1	34000	0.000198			sp|P80316|TCPE_MOUSE	Cct5	1	1	280000	0.0007			sp|Q8R0J7|VP37B_MOUSE	Vps37b	1	1	86000	0.000339			sp|Q9WV91|FPRP_MOUSE	Ptgfrn	2	2	440000	0.000836			sp|Q71M36|CSPG5_MOUSE	Cspg5	2	2	330000	0.000753			sp|P28571|SC6A9_MOUSE	Slc6a9	2	2	840000	0.00268		sp|Q8CBX0|CSC1_MOUSE	Tmem63c
	sp|Q9QYB8|ADDB_MOUSE	Add2	1	1	56000	0.000333			sp|O89023|TPP1_MOUSE	Tpp1	1	1	770000	0.00194			sp|Q920A5|RISC_MOUSE	Scpep1	1	1	15000	5.93e-05			sp|Q9CQI6|COTL1_MOUSE	Cotl1	2	2	580000	0.00111			sp|Q7TSK2|SEZ6_MOUSE	Sez6	2	2	670000	0.00154			sp|Q9WV69|DEMA_MOUSE	Dmtn	2	2	270000	0.000872		sp|Q62083|PICK1_MOUSE	Pick1
	sp|P17439|GLCM_MOUSE	Gba	1	1	22000	0.000131			sp|P35762|CD81_MOUSE	Cd81	1	1	120000	0.000296			sp|Q3U7U3|FBX7_MOUSE	Fbxo7	1	1	39000	0.000155			sp|O89051|ITM2B_MOUSE	Itm2b	2	2	370000	0.000708			sp|Q9WUK2|IF4H_MOUSE	Eif4h	2	2	3900000	0.00898			sp|Q8R1R3|STAR7_MOUSE	Stard7	2	2	1100000	0.00345		sp|E9Q4P1|WDFY1_MOUSE	Wdfy1
	sp|Q9JIG8|PRAF2_MOUSE	Praf2	1	1	150000	0.000892			sp|B0V2N1|PTPRS_MOUSE	Ptprs	1	1	110000	0.000269			sp|Q9CQX5|CLDN1_MOUSE	Cldnd1	1	1	160000	0.00064			tr|E0CY16|E0CY16_MOUSE	Cadm1	2	2	1300000	0.00241			sp|Q91Z38|TTC1_MOUSE	Ttc1	2	2	340000	0.000774			sp|Q60648|SAP3_MOUSE	Gm2a	2	2	1200000	0.00382		sp|Q8BWM0|PGES2_MOUSE	Ptges2
	sp|Q8BMF4|ODP2_MOUSE	Dlat	1	1	44000	0.000261			sp|O88848|ARL6_MOUSE	Arl6	1	1	160000	0.000402			sp|Q8CFE6|S38A2_MOUSE	Slc38a2	1	1	190000	0.00074			sp|O35678|MGLL_MOUSE	Mgll	2	2	320000	0.000615			sp|Q9WTX5|SKP1_MOUSE	Skp1	2	2	820000	0.00188			sp|Q9D1K7|CT027_MOUSE		2	2	820000	0.00262		sp|Q9CQU0|TXD12_MOUSE	Txndc12
	sp|P10605|CATB_MOUSE	Ctsb	1	1	66000	0.000388			sp|Q80TL4|PHF24_MOUSE	Phf24	1	1	530000	0.00132			sp|Q02248|CTNB1_MOUSE	Ctnnb1	1	1	30000	0.00012			sp|P62075|TIM13_MOUSE	Timm13	2	2	950000	0.00182			sp|Q9JM76|ARPC3_MOUSE	Arpc3	2	2	860000	0.00199			sp|Q9ERR7|SEP15_MOUSE	Selenof	2	2	360000	0.00114		sp|P62500|T22D1_MOUSE	Tsc22d1
	sp|Q8BFZ9|ERLN2_MOUSE	Erlin2	1	1	58000	0.000344			sp|Q9JM96|BORG4_MOUSE	Cdc42ep4	1	1	120000	0.000309			sp|Q9WV98|TIM9_MOUSE	Timm9	1	1	310000	0.00123			sp|P55302|AMRP_MOUSE	Lrpap1	2	2	280000	0.000531			sp|Q9R111|GUAD_MOUSE	Gda	2	2	130000	0.000295			sp|Q9JMB8|CNTN6_MOUSE	Cntn6	2	2	150000	0.00049		sp|Q8BG16|S6A15_MOUSE	Slc6a15
	sp|Q9CXE7|TMED5_MOUSE	Tmed5	1	1	42000	0.000251			sp|Q9CR20|IR3IP_MOUSE	Ier3ip1	1	1	300000	0.000753			tr|Q7M6W1|Q7M6W1_MOUSE	Rtn1	1	1	6200000	0.0245			sp|Q78JW9|UBFD1_MOUSE	Ubfd1	2	2	660000	0.00125			sp|Q62283|TSN7_MOUSE	Tspan7	2	2	1200000	0.00269			sp|O08992|SDCB1_MOUSE	Sdcbp	2	2	220000	0.000705		sp|Q5DTL9|S4A10_MOUSE	Slc4a10
	sp|Q05920|PYC_MOUSE	Pc	1	1	43000	0.000256			sp|Q8VHI3|OFUT2_MOUSE	Pofut2	1	1	97000	0.000243			sp|B1AXV0|FRS1L_MOUSE	Frrs1l	1	1	62000	0.000247			sp|P81117|NUCB2_MOUSE	Nucb2	2	2	370000	0.000713			sp|P48758|CBR1_MOUSE	Cbr1	2	2	360000	0.000823			sp|O35658|C1QBP_MOUSE	C1qbp	2	2	600000	0.00192		sp|Q9CQR2|RS21_MOUSE	Rps21
	sp|O88384|VTI1B_MOUSE	Vti1b	1	1	48000	0.000283			sp|P46425|GSTP2_MOUSE	Gstp2	1	1	210000	0.000524			sp|Q91VW5|GOGA4_MOUSE	Golga4	1	1	40000	0.00016			sp|P26231|CTNA1_MOUSE	Ctnna1	2	2	440000	0.000836			sp|P63028|TCTP_MOUSE	Tpt1	2	2	550000	0.00127			sp|A2ALU4|SHRM2_MOUSE	Shroom2	2	2	150000	0.000493		sp|P49615|CDK5_MOUSE	Cdk5
	tr|A2AUK8|A2AUK8_MOUSE	Epb41l1	1	1	120000	0.000693			sp|P0C913|OCC1_MOUSE		1	1	330000	0.000832			sp|Q8VHI3|OFUT2_MOUSE	Pofut2	1	1	68000	0.000268			sp|Q4VAA2|CDV3_MOUSE	Cdv3	2	2	560000	0.00107			tr|Q3TN93|Q3TN93_MOUSE	Ubqln1	2	2	260000	0.000594			sp|Q3UHH2|S22AN_MOUSE	Slc22a23	2	2	390000	0.00125		sp|Q8VEH8|ERLEC_MOUSE	Erlec1
	sp|Q921F2|TADBP_MOUSE	Tardbp	1	1	32000	0.000191			sp|Q9D6K5|SYJ2B_MOUSE	Synj2bp	1	1	200000	0.000513			sp|Q8BIQ5|CSTF2_MOUSE	Cstf2	1	1	300000	0.00119			sp|Q9D8N0|EF1G_MOUSE	Eef1g	2	2	780000	0.00148			sp|Q91X78|ERLN1_MOUSE	Erlin1	2	2	1600000	0.00368			sp|Q61644|PACN1_MOUSE	Pacsin1	2	2	240000	0.000769		sp|Q80TS3|AGRL3_MOUSE	Adgrl3
	sp|Q7TNF0|DOC2A_MOUSE	Doc2a	1	1	43000	0.000255			tr|A0A1L1SUR7|A0A1L1SUR7_MOUSE	Picalm	1	1	110000	0.00027			sp|P56371|RAB4A_MOUSE	Rab4a	1	1	220000	0.000854			sp|P56395|CYB5_MOUSE	Cyb5a	2	2	1100000	0.00206			sp|Q8CA95|PDE10_MOUSE	Pde10a	2	2	280000	0.000635			sp|Q9DCT2|NDUS3_MOUSE	Ndufs3	2	2	310000	0.000984		sp|Q3UHH2|S22AN_MOUSE	Slc22a23
	sp|Q3UV70|PDP1_MOUSE	Pdp1	1	1	21000	0.000123			sp|O09111|NDUBB_MOUSE	Ndufb11	1	1	240000	0.000597			sp|O35343|IMA3_MOUSE	Kpna4	1	1	120000	0.000475			sp|P70677|CASP3_MOUSE	Casp3	2	2	610000	0.00116			sp|P56380|AP4A_MOUSE	Nudt2	2	2	340000	0.000774			sp|Q60673|PTPRN_MOUSE	Ptprn	2	2	160000	0.00052		sp|Q9WV54|ASAH1_MOUSE	Asah1
	sp|Q9D1L0|CHCH2_MOUSE	Chchd2	1	1	49000	0.000291			tr|Q3UXU0|Q3UXU0_MOUSE	Tsc22d1	1	1	95000	0.00024			sp|Q8VEA4|MIA40_MOUSE	Chchd4	1	1	94000	0.000373			sp|Q61644|PACN1_MOUSE	Pacsin1	2	2	410000	0.000772			sp|P11404|FABPH_MOUSE	Fabp3	2	2	1300000	0.00303			sp|Q9R111|GUAD_MOUSE	Gda	2	2	170000	0.000554		sp|Q91VU1|YIPF1_MOUSE	Yipf1
	sp|Q6RUT7|CSMT1_MOUSE	Ccsmst1	1	1	23000	0.000136			sp|A2A690|TANC2_MOUSE	Tanc2	1	1	23000	5.87e-05			sp|Q8BXA0|LRFN5_MOUSE	Lrfn5	1	1	20000	7.77e-05			sp|P56380|AP4A_MOUSE	Nudt2	2	2	360000	0.000682			sp|P62075|TIM13_MOUSE	Timm13	2	2	820000	0.00188			sp|Q07409|CNTN3_MOUSE	Cntn3	2	2	170000	0.000551		sp|P53811|PIPNB_MOUSE	Pitpnb
	sp|P35235|PTN11_MOUSE	Ptpn11	1	1	51000	0.000301			tr|A2ANP1|A2ANP1_MOUSE	Fam219a	1	1	180000	0.000455			sp|B1ARW8|CA122_MOUSE		1	1	310000	0.00124			sp|Q64133|AOFA_MOUSE	Maoa	2	2	390000	0.000742			sp|Q9CRD0|OCAD1_MOUSE	Ociad1	2	2	450000	0.00104			sp|P21107|TPM3_MOUSE	Tpm3	2	2	960000	0.00305		sp|Q9JIF0|ANM1_MOUSE	Prmt1
	sp|Q8BUV8|GP107_MOUSE	Gpr107	1	1	47000	0.000281			tr|Q9CYV3|Q9CYV3_MOUSE	Prkar2a	1	1	42000	0.000105			sp|P97370|AT1B3_MOUSE	Atp1b3	1	1	290000	0.00113			sp|Q9CQI3|GMFB_MOUSE	Gmfb	2	2	530000	0.00101			sp|Q9WTP7|KAD3_MOUSE	Ak3	2	2	510000	0.00118			sp|P61087|UBE2K_MOUSE	Ube2k	2	2	650000	0.00208		sp|Q9R0S3|MMP17_MOUSE	Mmp17
	sp|P63248|IPKA_MOUSE	Pkia	1	1	36000	0.000212			sp|Q60715|P4HA1_MOUSE	P4ha1	1	1	130000	0.000327			sp|P62500|T22D1_MOUSE	Tsc22d1	1	1	1100000	0.00445			sp|P61961|UFM1_MOUSE	Ufm1	2	2	710000	0.00134			sp|Q9JMA1|UBP14_MOUSE	Usp14	2	2	230000	0.000542			sp|P62073|TIM10_MOUSE	Timm10	2	2	320000	0.00102		sp|Q3TD49|SPP2B_MOUSE	Sppl2b
	sp|Q8R5H6|WASF1_MOUSE	Wasf1	1	1	48000	0.000285			sp|Q3U7U3|FBX7_MOUSE	Fbxo7	1	1	98000	0.000247			sp|P51807|DYLT1_MOUSE	Dynlt1	1	1	57000	0.000225			sp|P29595|NEDD8_MOUSE	Nedd8	2	2	1400000	0.00265			sp|Q63932|MP2K2_MOUSE	Map2k2	2	2	360000	0.000838			sp|Q99KU0|VMP1_MOUSE	Vmp1	2	2	680000	0.00218		sp|Q61418|CLCN4_MOUSE	Clcn4
	sp|Q8BWY7|S39AB_MOUSE	Slc39a11	1	1	53000	0.000315			tr|D4N6R6|D4N6R6_MUSMC	Hbbt1	1	1	290000	0.000732			sp|Q6WVG3|KCD12_MOUSE	Kctd12	1	1	58000	0.000228			sp|Q7TSJ2|MAP6_MOUSE	Map6	2	2	370000	0.000708			sp|O88848|ARL6_MOUSE	Arl6	2	2	280000	0.00065			sp|P35235|PTN11_MOUSE	Ptpn11	2	2	150000	0.000476		sp|Q64516|GLPK_MOUSE	Gk
	sp|Q8R0J7|VP37B_MOUSE	Vps37b	1	1	63000	0.000375			sp|Q3U2P1|SC24A_MOUSE	Sec24a	1	1	85000	0.000213			sp|Q5F285|TM256_MOUSE	Tmem256	1	1	350000	0.00138			sp|Q9CPW4|ARPC5_MOUSE	Arpc5	2	2	1300000	0.0024			sp|P46414|CDN1B_MOUSE	Cdkn1b	2	2	430000	0.000994			sp|Q61206|PA1B2_MOUSE	Pafah1b2	2	2	410000	0.00131		sp|Q922Y1|UBXN1_MOUSE	Ubxn1
	sp|Q8CBX0|CSC1_MOUSE	Tmem63c	1	1	14000	8.09e-05			sp|Q3TAS6|EMC10_MOUSE	Emc10	1	1	370000	0.000928			sp|Q8K2P7|S38A1_MOUSE	Slc38a1	1	1	78000	0.000311			sp|Q99J99|THTM_MOUSE	Mpst	2	2	370000	0.000706			sp|P40124|CAP1_MOUSE	Cap1	2	2	460000	0.00105			sp|P02088|HBB1_MOUSE	Hbb-b1	2	2	240000	0.000752		sp|O08638|MYH11_MOUSE	Myh11
	sp|P27545|CERS1_MOUSE	Cers1	1	1	25000	0.000148			sp|Q8R088|GLP3L_MOUSE	Golph3l	1	1	39000	9.75e-05			sp|Q9D0E3|LYSM1_MOUSE	Lysmd1	1	1	130000	0.000507			sp|P54830|PTN5_MOUSE	Ptpn5	2	2	280000	0.000524			sp|O35449|PRRT1_MOUSE	Prrt1	2	2	1100000	0.00244			sp|Q9DB15|RM12_MOUSE	Mrpl12	2	2	700000	0.00224		sp|Q9CWM4|PFD1_MOUSE	Pfdn1
	sp|Q9D964|GATM_MOUSE	Gatm	1	1	65000	0.000387			sp|Q9CQX5|CLDN1_MOUSE	Cldnd1	1	1	230000	0.000576			sp|Q6PGE7|SC6A7_MOUSE	Slc6a7	1	1	95000	0.000376			sp|Q8R4S0|PP14C_MOUSE	Ppp1r14c	2	2	940000	0.0018			sp|Q8VHI3|OFUT2_MOUSE	Pofut2	2	2	210000	0.000479			sp|Q8K2P7|S38A1_MOUSE	Slc38a1	2	2	350000	0.00112		sp|Q56A07|SCN2B_MOUSE	Scn2b
	sp|Q9D882|CJ035_MOUSE		1	1	150000	0.000883			sp|B1ARW8|CA122_MOUSE		1	1	510000	0.00128			sp|Q9CRC6|BORC7_MOUSE	Borcs7	1	1	110000	0.000418			sp|O88712|CTBP1_MOUSE	Ctbp1	2	2	790000	0.0015			sp|Q5DTL9|S4A10_MOUSE	Slc4a10	2	2	81000	0.000186			sp|P14824|ANXA6_MOUSE	Anxa6	2	2	120000	0.000397		sp|Q9D6K5|SYJ2B_MOUSE	Synj2bp
	sp|P24638|PPAL_MOUSE	Acp2	1	1	37000	0.00022			sp|P62500|T22D1_MOUSE	Tsc22d1	1	1	1300000	0.00318			sp|Q9QXV0|PCSK1_MOUSE	Pcsk1n	1	1	120000	0.000476			sp|Q8K009|AL1L2_MOUSE	Aldh1l2	2	2	310000	0.000585			sp|Q64133|AOFA_MOUSE	Maoa	2	2	460000	0.00107			sp|P32921|SYWC_MOUSE	Wars	2	2	200000	0.000632		sp|P70670|NACAM_MOUSE	Naca
	tr|A0A0N4SUI7|A0A0N4SUI7_MOUSE	2210013O21Rik	1	1	21000	0.000125			tr|Q9EQN9|Q9EQN9_MOUSE	Slc19a2	1	1	120000	0.000289			sp|O35658|C1QBP_MOUSE	C1qbp	1	1	260000	0.00102			sp|Q9CYZ2|TPD54_MOUSE	Tpd52l2	2	2	450000	0.000865			sp|Q05186|RCN1_MOUSE	Rcn1	2	2	890000	0.00204			sp|Q9Z0R6|ITSN2_MOUSE	Itsn2	2	2	370000	0.00119		sp|Q91VW5|GOGA4_MOUSE	Golga4
	sp|Q9WV96|T10B_MOUSE	Timm10b	1	1	63000	0.000374			sp|Q6IRU5|CLCB_MOUSE	Cltb	1	1	230000	0.000567			sp|Q80TB8|VAT1L_MOUSE	Vat1l	1	1	67000	0.000264			sp|P14152|MDHC_MOUSE	Mdh1	2	2	610000	0.00116			sp|P81117|NUCB2_MOUSE	Nucb2	2	2	480000	0.0011			sp|P63080|GBRB3_MOUSE	Gabrb3	2	2	140000	0.00044		sp|Q61249|IGBP1_MOUSE	Igbp1
	sp|Q8K009|AL1L2_MOUSE	Aldh1l2	1	1	21000	0.000124			sp|Q80XN0|BDH_MOUSE	Bdh1	1	1	78000	0.000196			sp|Q9D8B7|JAM3_MOUSE	Jam3	1	1	32000	0.000126			sp|Q80XN0|BDH_MOUSE	Bdh1	2	2	500000	0.000957			tr|Q4VA93|Q4VA93_MOUSE	Prkca	2	2	700000	0.00163			sp|Q6TEK5|VKORL_MOUSE	Vkorc1l1	2	2	710000	0.00228		sp|Q62205|SCN9A_MOUSE	Scn9a
	sp|P63037|DNJA1_MOUSE	Dnaja1	1	1	30000	0.000179			sp|P38060|HMGCL_MOUSE	Hmgcl	1	1	43000	0.000109			sp|P02469|LAMB1_MOUSE	Lamb1	1	1	34000	0.000136			sp|Q9JJK2|LANC2_MOUSE	Lancl2	2	2	400000	0.000766			sp|Q8K2P7|S38A1_MOUSE	Slc38a1	2	2	540000	0.00126			sp|P67778|PHB_MOUSE	Phb	2	2	250000	0.000795		sp|Q9CQ48|NUDC2_MOUSE	Nudcd2
	sp|Q9D1H7|GET4_MOUSE	Get4	1	1	30000	0.000177			sp|Q9DB73|NB5R1_MOUSE	Cyb5r1	1	1	87000	0.000218			sp|Q9D1L0|CHCH2_MOUSE	Chchd2	1	1	34000	0.000136			sp|Q9CQX5|CLDN1_MOUSE	Cldnd1	2	2	820000	0.00156			sp|Q9CZ42|NNRD_MOUSE	Naxd	2	2	660000	0.00153			sp|Q9DB77|QCR2_MOUSE	Uqcrc2	2	2	180000	0.000588		sp|Q8VCM8|NCLN_MOUSE	Ncln
	sp|P42125|ECI1_MOUSE	Eci1	1	1	26000	0.000151			sp|Q9QXW9|LAT2_MOUSE	Slc7a8	1	1	190000	0.000475			sp|Q9R0M4|PODXL_MOUSE	Podxl	1	1	58000	0.000229			sp|Q8VDL4|ADPGK_MOUSE	Adpgk	2	2	430000	0.000812			sp|Q03173|ENAH_MOUSE	Enah	2	2	94000	0.000216			sp|Q9QY76|VAPB_MOUSE	Vapb	2	2	1600000	0.005		sp|O89051|ITM2B_MOUSE	Itm2b
	sp|Q8K4D3|S36A1_MOUSE	Slc36a1	1	1	30000	0.000176			sp|Q9Z2I2|FKB1B_MOUSE	Fkbp1b	1	1	87000	0.000217			sp|Q9Z0P5|TWF2_MOUSE	Twf2	1	1	100000	0.000403			sp|P28571|SC6A9_MOUSE	Slc6a9	2	2	1300000	0.00254			sp|Q7TNP2|2AAB_MOUSE	Ppp2r1b	2	2	600000	0.00139			sp|Q8BG58|P4HTM_MOUSE	P4htm	2	2	190000	0.000595		sp|Q8BR86|KIRR3_MOUSE	Kirrel3
	sp|Q811D0|DLG1_MOUSE	Dlg1	1	1	50000	0.000295			sp|Q8BWP8|B4GA1_MOUSE	B4gat1	1	1	160000	0.000405			sp|Q9JHW2|NIT2_MOUSE	Nit2	1	1	45000	0.000179			sp|Q3UHH2|S22AN_MOUSE	Slc22a23	2	2	410000	0.000779			tr|Q6PD36|Q6PD36_MOUSE	Nptxr	2	2	2200000	0.00508			sp|Q9CR00|PSMD9_MOUSE	Psmd9	2	2	150000	0.000474		sp|P63054|PCP4_MOUSE	Pcp4
	sp|Q9CQU0|TXD12_MOUSE	Txndc12	1	1	94000	0.000554			tr|A2AEK3|A2AEK3_MOUSE	Cstf2	1	1	51000	0.000127			sp|Q9CWE0|MFR1L_MOUSE	Mtfr1l	1	1	53000	0.00021			sp|P70670|NACAM_MOUSE	Naca	2	2	460000	0.000874			sp|P61087|UBE2K_MOUSE	Ube2k	2	2	1300000	0.00303			sp|P27601|GNA13_MOUSE	Gna13	2	2	510000	0.00164		sp|Q640M6|GDPD5_MOUSE	Gdpd5
	sp|P00397|COX1_MOUSE	Mtco1	1	1	32000	0.000189			sp|Q9JHQ5|LZTL1_MOUSE	Lztfl1	1	1	110000	0.000272			sp|Q8BUV8|GP107_MOUSE	Gpr107	1	1	100000	0.000399			sp|P42932|TCPQ_MOUSE	Cct8	2	2	260000	0.000499			sp|Q60673|PTPRN_MOUSE	Ptprn	2	2	170000	0.000393			sp|Q810C1|SLIK1_MOUSE	Slitrk1	2	2	290000	0.000921		sp|O08529|CAN2_MOUSE	Capn2
	sp|Q80X71|T106B_MOUSE	Tmem106b	1	1	52000	0.000305			tr|F8VQL0|F8VQL0_MOUSE	Met	1	1	1100000	0.00267			sp|P01843|LAC1_MOUSE		1	1	680000	0.00271			sp|O70493|SNX12_MOUSE	Snx12	2	2	870000	0.00166			sp|A2ALU4|SHRM2_MOUSE	Shroom2	2	2	300000	0.000681			sp|P28738|KIF5C_MOUSE	Kif5c	2	2	130000	0.000403		sp|Q9ERR1|NDEL1_MOUSE	Ndel1
	sp|Q9R111|GUAD_MOUSE	Gda	1	1	61000	0.000359			sp|Q8C522|ENDD1_MOUSE	Endod1	1	1	160000	0.00041			sp|Q91Y86|MK08_MOUSE	Mapk8	1	1	61000	0.000242			sp|P67778|PHB_MOUSE	Phb	2	2	210000	0.000391			sp|P26231|CTNA1_MOUSE	Ctnna1	2	2	230000	0.000537			sp|P45878|FKBP2_MOUSE	Fkbp2	2	2	1100000	0.00346		sp|Q9D0E3|LYSM1_MOUSE	Lysmd1
	sp|O08915|AIP_MOUSE	Aip	1	1	48000	0.000283			sp|Q9D920|BORC5_MOUSE	Borcs5	1	1	53000	0.000133			sp|Q9D3L0|F174A_MOUSE	Fam174a	1	1	34000	0.000136			sp|Q9D0R8|LSM12_MOUSE	Lsm12	2	2	590000	0.00112			sp|Q9CPT4|MYDGF_MOUSE	Mydgf	2	2	1100000	0.00251			sp|Q9JIG8|PRAF2_MOUSE	Praf2	2	2	530000	0.0017		sp|Q8BGU5|CCNY_MOUSE	Ccny
	sp|Q99JH7|CSTN3_MOUSE	Clstn3	1	1	43000	0.000252			sp|Q6PGN3|DCLK2_MOUSE	Dclk2	1	1	71000	0.000177			sp|P63321|RALA_MOUSE	Rala	1	1	54000	0.000214			sp|Q8BWT1|THIM_MOUSE	Acaa2	2	2	930000	0.00177			sp|Q9DAU1|CNPY3_MOUSE	Cnpy3	2	2	620000	0.00144			sp|Q9D8N0|EF1G_MOUSE	Eef1g	2	2	300000	0.000964		sp|Q9ES89|EXTL2_MOUSE	Extl2
	sp|P62073|TIM10_MOUSE	Timm10	1	1	38000	0.000227			sp|Q8BHC1|RB39B_MOUSE	Rab39b	1	1	150000	0.000374			sp|O35153|BET1L_MOUSE	Bet1l	1	1	190000	0.000758			sp|Q9D172|ES1_MOUSE	D10Jhu81e	2	2	1300000	0.00241			sp|Q62178|SEM4A_MOUSE	Sema4a	2	2	140000	0.000332			sp|P42932|TCPQ_MOUSE	Cct8	2	2	390000	0.00124		sp|Q3TFQ1|SPRY7_MOUSE	Spryd7
	tr|A0A0B4J1I9|A0A0B4J1I9_MOUSE	Igkv4-55	1	1	50000	0.000294			sp|P52795|EFNB1_MOUSE	Efnb1	1	1	52000	0.000131			sp|Q9CQ26|STABP_MOUSE	Stambp	1	1	170000	0.000681			tr|D3Z183|D3Z183_MOUSE	Mfsd6	2	2	310000	0.000595			sp|E9Q4P1|WDFY1_MOUSE	Wdfy1	2	2	1400000	0.00334			sp|Q8BGT1|FLRT3_MOUSE	Flrt3	2	2	240000	0.000771		sp|Q9WV98|TIM9_MOUSE	Timm9
	sp|Q9EQ20|MMSA_MOUSE	Aldh6a1	1	1	27000	0.000161			tr|D3Z742|D3Z742_MOUSE	Mb21d2	1	1	41000	0.000104			sp|Q6P8I4|PCNP_MOUSE	Pcnp	1	1	51000	0.000203			tr|Q3URQ4|Q3URQ4_MOUSE	Fam8a1	2	2	260000	0.000496			sp|Q61644|PACN1_MOUSE	Pacsin1	2	2	530000	0.00122			sp|Q9CQN3|TOM6_MOUSE	Tomm6	2	2	1300000	0.00409		sp|P53986|MOT1_MOUSE	Slc16a1
	sp|Q9EPC1|PARVA_MOUSE	Parva	1	1	710000	0.00422			sp|Q7TPB0|PLPR3_MOUSE	Plppr3	1	1	250000	0.000629			sp|Q8WUR0|CS012_MOUSE		1	1	240000	0.000933			sp|Q9JIG8|PRAF2_MOUSE	Praf2	2	2	600000	0.00114			sp|P29533|VCAM1_MOUSE	Vcam1	2	2	620000	0.00144			sp|Q3UZP4|SVIP_MOUSE	Svip	2	2	240000	0.000771		sp|P11983|TCPA_MOUSE	Tcp1
	sp|Q9Z0P5|TWF2_MOUSE	Twf2	1	1	47000	0.000278			sp|P11798|KCC2A_MOUSE	Camk2a	1	1	220000	0.000547			sp|Q8BWP8|B4GA1_MOUSE	B4gat1	1	1	110000	0.000421			sp|Q9R111|GUAD_MOUSE	Gda	2	2	230000	0.000446			sp|P63321|RALA_MOUSE	Rala	2	2	1100000	0.00265			tr|Q58E70|Q58E70_MOUSE	Tpm3	2	2	690000	0.00219		sp|O70318|E41L2_MOUSE	Epb41l2
	sp|Q9D920|BORC5_MOUSE	Borcs5	1	1	83000	0.00049			sp|Q61809|LRRN1_MOUSE	Lrrn1	1	1	190000	0.000481			tr|Q80TH1|Q80TH1_MOUSE	Dlg3	1	1	79000	0.000313			sp|Q9JHU2|PALMD_MOUSE	Palmd	2	2	600000	0.00114			sp|Q8BWP8|B4GA1_MOUSE	B4gat1	2	2	1100000	0.00257			sp|Q8BLQ7|CTR4_MOUSE	Slc7a4	2	2	260000	0.00082		sp|Q6PA06|ATLA2_MOUSE	Atl2
	sp|Q8BKX1|BAIP2_MOUSE	Baiap2	1	1	69000	0.000409			sp|O89051|ITM2B_MOUSE	Itm2b	1	1	170000	0.000423			sp|Q9D4C9|CLVS1_MOUSE	Clvs1	1	1	130000	0.00053			sp|Q8BWG8|ARRB1_MOUSE	Arrb1	2	2	310000	0.000591			sp|P11798|KCC2A_MOUSE	Camk2a	2	2	740000	0.0017			sp|O08709|PRDX6_MOUSE	Prdx6	2	2	360000	0.00114		sp|Q9CQC6|BZW1_MOUSE	Bzw1
	sp|Q91X58|ZFN2B_MOUSE	Zfand2b	1	1	35000	0.000209			tr|A0A075B5M4|A0A075B5M4_MOUSE	Igkv4-57-1	1	1	120000	0.000314			sp|Q80TA1|EPT1_MOUSE	Selenoi	1	1	13000	5.07e-05			sp|Q64322|NPDC1_MOUSE	Npdc1	2	2	540000	0.00103			sp|Q9DCB4|ARP21_MOUSE	Arpp21	2	2	360000	0.00083			sp|Q8CHU3|EPN2_MOUSE	Epn2	2	2	200000	0.000648		sp|P70205|PACR_MOUSE	Adcyap1r1
	sp|P02469|LAMB1_MOUSE	Lamb1	1	1	14000	8.56e-05			sp|Q5SSL4|ABR_MOUSE	Abr	1	1	23000	5.69e-05			sp|Q6TEK5|VKORL_MOUSE	Vkorc1l1	1	1	220000	0.00086			sp|Q8BRF7|SCFD1_MOUSE	Scfd1	2	2	250000	0.000473			sp|P49615|CDK5_MOUSE	Cdk5	2	2	330000	0.000753			sp|A2A699|F1712_MOUSE	Fam171a2	2	2	180000	0.000563		sp|P55012|S12A2_MOUSE	Slc12a2
	sp|P62342|SELT_MOUSE	Selenot	1	1	66000	0.000391			sp|P01843|LAC1_MOUSE		1	1	520000	0.0013			sp|Q9ERR7|SEP15_MOUSE	Selenof	1	1	240000	0.000937			sp|Q3TDN2|FAF2_MOUSE	Faf2	2	2	4100000	0.00776			sp|Q8VD37|SGIP1_MOUSE	Sgip1	2	2	260000	0.000602			tr|Q792Z1|Q792Z1_MOUSE	Try10	2	2	3300000	0.0105		sp|Q04736|YES_MOUSE	Yes1
	sp|Q9R1V6|ADA22_MOUSE	Adam22	1	1	83000	0.000492			sp|O88809|DCX_MOUSE	Dcx	1	1	100000	0.000252			sp|P35762|CD81_MOUSE	Cd81	1	1	100000	0.000412			sp|P41216|ACSL1_MOUSE	Acsl1	2	2	360000	0.000686			sp|P63248|IPKA_MOUSE	Pkia	2	2	920000	0.00212			sp|P62858|RS28_MOUSE	Rps28	2	2	1100000	0.00361		sp|O88485|DC1I1_MOUSE	Dync1i1
	sp|Q9CWM4|PFD1_MOUSE	Pfdn1	1	1	370000	0.00216			sp|Q99JT2|STK26_MOUSE	Stk26	1	1	270000	0.000668			sp|Q3UGS4|MCRI1_MOUSE	Mcrip1	1	1	190000	0.000739			sp|P61750|ARF4_MOUSE	Arf4	2	2	1800000	0.00352			sp|P47941|CRKL_MOUSE	Crkl	2	2	580000	0.00134			sp|O08807|PRDX4_MOUSE	Prdx4	2	2	830000	0.00265		sp|Q9CY18|SNX7_MOUSE	Snx7
	sp|Q8BFY9|TNPO1_MOUSE	Tnpo1	1	1	51000	0.000302			tr|Q80VM5|Q80VM5_MOUSE	Dpp6	1	1	280000	0.000706			sp|P21836|ACES_MOUSE	Ache	1	1	80000	0.000316			sp|Q9CQH3|NDUB5_MOUSE	Ndufb5	2	2	960000	0.00182			sp|P05532|KIT_MOUSE	Kit	2	2	170000	0.000384			sp|P97950|RB33A_MOUSE	Rab33a	2	2	240000	0.000782		sp|Q64322|NPDC1_MOUSE	Npdc1
	tr|Q8K094|Q8K094_MOUSE	Pvr	1	1	41000	0.000245			tr|A0A140T8N3|A0A140T8N3_MOUSE	Igkv13-84	1	1	270000	0.000675			sp|Q9DAS9|GBG12_MOUSE	Gng12	1	1	250000	0.000972			sp|Q9CZS1|AL1B1_MOUSE	Aldh1b1	2	2	380000	0.000719			sp|P70429|EVL_MOUSE	Evl	2	2	500000	0.00116			sp|Q9CY50|SSRA_MOUSE	Ssr1	2	2	300000	0.000946		sp|Q148V7|K1468_MOUSE	Kiaa1468
	sp|P47802|MTX1_MOUSE	Mtx1	1	1	70000	0.000416			sp|Q9CQM2|ERD22_MOUSE	Kdelr2	1	1	45000	0.000112			sp|Q9QUR6|PPCE_MOUSE	Prep	1	1	60000	0.000237			sp|Q8BH27|MEGF9_MOUSE	Megf9	2	2	570000	0.00108			sp|Q62443|NPTX1_MOUSE	Nptx1	2	2	590000	0.00137			sp|Q8BR63|F177A_MOUSE	Fam177a1	2	2	2300000	0.00724		sp|Q9CZS1|AL1B1_MOUSE	Aldh1b1
	sp|Q9CPW0|CNTP2_MOUSE	Cntnap2	1	1	49000	0.000292			sp|O70401|TSN6_MOUSE	Tspan6	1	1	320000	0.000801			sp|Q921E2|RAB31_MOUSE	Rab31	1	1	230000	0.000919			sp|Q9WV54|ASAH1_MOUSE	Asah1	2	2	360000	0.000682			sp|O08992|SDCB1_MOUSE	Sdcbp	2	2	230000	0.000529			sp|Q9D3P8|PLRKT_MOUSE	Plgrkt	2	2	200000	0.000629		sp|Q68ED2|GRM7_MOUSE	Grm7
	sp|Q920V1|B3GL1_MOUSE	B3galnt1	1	1	41000	0.000242			sp|P19157|GSTP1_MOUSE	Gstp1	1	1	93000	0.000234			sp|P15105|GLNA_MOUSE	Glul	1	1	150000	0.000596			sp|Q64373|B2CL1_MOUSE	Bcl2l1	2	2	280000	0.00053			sp|Q9QYJ0|DNJA2_MOUSE	Dnaja2	2	2	430000	0.000994			sp|P31254|UBA1Y_MOUSE	Uba1y	2	2	320000	0.00102		sp|P03921|NU5M_MOUSE	Mtnd5
	sp|Q810C1|SLIK1_MOUSE	Slitrk1	1	1	31000	0.000186			sp|P60904|DNJC5_MOUSE	Dnajc5	1	1	1600000	0.004			sp|Q9D7V2|LYSM2_MOUSE	Lysmd2	1	1	140000	0.000561			sp|Q61990|PCBP2_MOUSE	Pcbp2	2	2	360000	0.000679			sp|Q9JJZ4|UB2J1_MOUSE	Ube2j1	2	2	440000	0.00101			sp|Q3UE37|UBE2Z_MOUSE	Ube2z	2	2	370000	0.00119		sp|Q8BMP6|GCP60_MOUSE	Acbd3
	tr|A0A1W2P7Y1|A0A1W2P7Y1_MOUSE	Ptprk	1	1	7000	4.11e-05			sp|P48962|ADT1_MOUSE	Slc25a4	1	1	230000	0.000565			sp|Q9CYT6|CAP2_MOUSE	Cap2	1	1	68000	0.00027			sp|P61804|DAD1_MOUSE	Dad1	2	2	9800000	0.0187			tr|B7ZNF6|B7ZNF6_MOUSE	Ctnnd2	2	2	1100000	0.00245			sp|Q8K0D5|EFGM_MOUSE	Gfm1	2	2	300000	0.00097		sp|Q62178|SEM4A_MOUSE	Sema4a
	sp|Q6GV12|KDSR_MOUSE	Kdsr	1	1	46000	0.000274			sp|Q8K1Z0|COQ9_MOUSE	Coq9	1	1	130000	0.000315			tr|Q3UXU0|Q3UXU0_MOUSE	Tsc22d1	1	1	50000	0.000197			sp|P28738|KIF5C_MOUSE	Kif5c	2	2	230000	0.00044			sp|O55242|SGMR1_MOUSE	Sigmar1	2	2	220000	0.000501			sp|Q8BLN5|ERG7_MOUSE	Lss	2	2	280000	0.000883		sp|Q9D4C9|CLVS1_MOUSE	Clvs1
	sp|Q3UBX0|TM109_MOUSE	Tmem109	1	1	170000	0.00101			sp|Q9CPV4|GLOD4_MOUSE	Glod4	1	1	120000	0.00031			sp|Q9JIF0|ANM1_MOUSE	Prmt1	1	1	73000	0.000289			sp|Q8VEH8|ERLEC_MOUSE	Erlec1	2	2	230000	0.000429			sp|Q9R0P5|DEST_MOUSE	Dstn	2	2	1100000	0.00259			sp|Q6NZC7|S23IP_MOUSE	Sec23ip	2	2	410000	0.0013		sp|Q9EPL2|CSTN1_MOUSE	Clstn1
	sp|P35822|PTPRK_MOUSE	Ptprk	1	1	33000	0.000193			sp|Q9QYB8|ADDB_MOUSE	Add2	1	1	190000	0.000488			sp|Q9Z0R6|ITSN2_MOUSE	Itsn2	1	1	170000	0.000655			sp|Q0VBF8|STUM_MOUSE	Stum	2	2	860000	0.00163			sp|Q8BU31|RAP2C_MOUSE	Rap2c	2	2	290000	0.00066			sp|O88602|CCG2_MOUSE	Cacng2	2	2	390000	0.00124		sp|O55131|SEPT7_MOUSE	2017-09-07
	sp|Q9DBJ1|PGAM1_MOUSE	Pgam1	1	1	380000	0.00223			sp|Q91X51|GORS1_MOUSE	Gorasp1	1	1	110000	0.000283			sp|Q8R001|MARE2_MOUSE	Mapre2	1	1	160000	0.000633			sp|P21107|TPM3_MOUSE	Tpm3	2	2	840000	0.0016			sp|Q9D5V6|SYAP1_MOUSE	Syap1	2	2	240000	0.000545			sp|P70280|VAMP7_MOUSE	Vamp7	2	2	480000	0.00153		sp|Q9JJK2|LANC2_MOUSE	Lancl2
	sp|Q9R1V4|ADA11_MOUSE	Adam11	1	1	34000	0.0002			sp|Q8R139|S29A4_MOUSE	Slc29a4	1	1	130000	0.000331			sp|Q6NVF0|OCRL_MOUSE	Ocrl	1	1	85000	0.000337			tr|Q6P0A6|Q6P0A6_MOUSE	Pcdh10	2	2	270000	0.000513			sp|Q9CPW4|ARPC5_MOUSE	Arpc5	2	2	1100000	0.00265			sp|P68040|RACK1_MOUSE	Rack1	2	2	200000	0.000644		sp|P62073|TIM10_MOUSE	Timm10
	sp|P11983|TCPA_MOUSE	Tcp1	1	1	35000	0.000207			sp|Q9D4C9|CLVS1_MOUSE	Clvs1	1	1	200000	0.000508			sp|Q9D964|GATM_MOUSE	Gatm	1	1	110000	0.000428			sp|Q9ES89|EXTL2_MOUSE	Extl2	2	2	550000	0.00104			sp|P45591|COF2_MOUSE	Cfl2	2	2	200000	0.000451			sp|P60335|PCBP1_MOUSE	Pcbp1	2	2	500000	0.0016		sp|Q6NVE8|WDR44_MOUSE	Wdr44
	sp|O54962|BAF_MOUSE	Banf1	1	1	50000	0.000297			sp|Q9CQ60|6PGL_MOUSE	Pgls	1	1	38000	9.64e-05			sp|Q61016|GBG7_MOUSE	Gng7	1	1	740000	0.00295			sp|O09126|SEM4D_MOUSE	Sema4d	2	2	420000	0.000804			tr|E0CY16|E0CY16_MOUSE	Cadm1	2	2	760000	0.00175			sp|Q61330|CNTN2_MOUSE	Cntn2	2	2	120000	0.000399		sp|Q9JIY5|HTRA2_MOUSE	Htra2
	sp|Q9QYB5|ADDG_MOUSE	Add3	1	1	19000	0.000113			sp|P53798|FDFT_MOUSE	Fdft1	1	1	290000	0.000735			sp|Q6IEE6|T132E_MOUSE	Tmem132e	1	1	22000	8.63e-05			sp|Q9DCT2|NDUS3_MOUSE	Ndufs3	2	2	740000	0.0014			sp|Q8R139|S29A4_MOUSE	Slc29a4	2	2	470000	0.00109			sp|Q8VD37|SGIP1_MOUSE	Sgip1	2	2	260000	0.000831		sp|Q9D8V0|HM13_MOUSE	Hm13
	sp|Q9DB50|AP1S2_MOUSE	Ap1s2	1	1	47000	0.000279			sp|Q9DCA7|CALY_MOUSE	Caly	1	1	100000	0.000255			sp|Q9QZ88|VPS29_MOUSE	Vps29	1	1	130000	0.000528			sp|P10605|CATB_MOUSE	Ctsb	2	2	830000	0.00157			sp|Q8BWM0|PGES2_MOUSE	Ptges2	2	2	340000	0.000789			sp|P70245|EBP_MOUSE	Ebp	2	2	150000	0.000489		sp|Q8BFY6|PEF1_MOUSE	Pef1
	sp|P97333|NRP1_MOUSE	Nrp1	1	1	18000	0.000105			sp|A2BH40|ARI1A_MOUSE	Arid1a	1	1	44000	0.000111			sp|Q8BHC1|RB39B_MOUSE	Rab39b	1	1	210000	0.000841			sp|Q07076|ANXA7_MOUSE	Anxa7	2	2	860000	0.00164			sp|Q9D0R8|LSM12_MOUSE	Lsm12	2	2	610000	0.00142			sp|Q3THE2|ML12B_MOUSE	Myl12b	2	2	160000	0.000517		sp|Q9JKZ2|SC5A3_MOUSE	Slc5a3
	sp|O88696|CLPP_MOUSE	Clpp	1	1	27000	0.00016			sp|Q3UGS4|MCRI1_MOUSE	Mcrip1	1	1	380000	0.000961			sp|Q91VM9|IPYR2_MOUSE	Ppa2	1	1	73000	0.000289			sp|Q3UUG6|TBC24_MOUSE	Tbc1d24	2	2	260000	0.0005			tr|Q3URQ4|Q3URQ4_MOUSE	Fam8a1	2	2	280000	0.00065			sp|Q9CWM4|PFD1_MOUSE	Pfdn1	2	2	850000	0.00273		sp|P08414|KCC4_MOUSE	Camk4
	sp|Q01730|RSU1_MOUSE	Rsu1	1	1	27000	0.000159			sp|Q8BHC9|FUT11_MOUSE	Fut11	1	1	34000	8.48e-05			sp|Q9WV18|GABR1_MOUSE	Gabbr1	1	1	170000	0.000689			sp|O08709|PRDX6_MOUSE	Prdx6	2	2	360000	0.000681			sp|P97783|AF1Q_MOUSE	Mllt11	2	2	580000	0.00135			sp|Q9CVB6|ARPC2_MOUSE	Arpc2	2	2	500000	0.0016		sp|Q9DCV4|RMD1_MOUSE	Rmdn1
	sp|Q8K097|LFG2_MOUSE	Faim2	1	1	94000	0.000554			sp|Q9CPU4|MGST3_MOUSE	Mgst3	1	1	120000	0.000313			sp|Q8CDN6|TXNL1_MOUSE	Txnl1	1	1	56000	0.000222			sp|P11404|FABPH_MOUSE	Fabp3	2	2	1100000	0.00201			sp|Q66L44|CBARP_MOUSE	Cbarp	2	2	310000	0.000711			sp|Q64310|SURF4_MOUSE	Surf4	2	2	2400000	0.00776		sp|P55302|AMRP_MOUSE	Lrpap1
	sp|Q8VE47|UBA5_MOUSE	Uba5	1	1	30000	0.000178			sp|P00158|CYB_MOUSE	Mt-Cyb	1	1	270000	0.000678			sp|Q8BJU2|TSN9_MOUSE	Tspan9	1	1	190000	0.000745			tr|D1FNM8|D1FNM8_MOUSE	Atp2b4	2	2	2900000	0.00556			sp|Q8BTX9|HSDL1_MOUSE	Hsdl1	2	2	330000	0.000767			sp|P97823|LYPA1_MOUSE	Lypla1	2	2	310000	0.000988		sp|Q9CW79|GOGA1_MOUSE	Golga1
	sp|Q99M51|NCK1_MOUSE	Nck1	1	1	62000	0.000367			sp|Q7TMF3|NDUAC_MOUSE	Ndufa12	1	1	70000	0.000177			sp|O70401|TSN6_MOUSE	Tspan6	1	1	160000	0.000622			sp|Q6TEK5|VKORL_MOUSE	Vkorc1l1	2	2	820000	0.00155			sp|P61804|DAD1_MOUSE	Dad1	2	2	7000000	0.0162			sp|P70205|PACR_MOUSE	Adcyap1r1	2	2	320000	0.00103		sp|Q3UVK0|ERMP1_MOUSE	Ermp1
	sp|Q8C437|PEX5R_MOUSE	Pex5l	1	1	49000	0.00029			sp|Q8VHH7|ADCY3_MOUSE	Adcy3	1	1	100000	0.000257			sp|Q9R1K9|CETN2_MOUSE	Cetn2	1	1	79000	0.000312			sp|Q8K0D5|EFGM_MOUSE	Gfm1	2	2	310000	0.000589			sp|Q7TN79|AKA7G_MOUSE	Akap7	2	2	820000	0.00189			sp|Q9CR64|KISHA_MOUSE	Tmem167a	2	2	300000	0.000966		sp|Q8CIP5|DISP2_MOUSE	Disp2
	sp|Q8BTX9|HSDL1_MOUSE	Hsdl1	1	1	180000	0.00109			sp|Q9JHZ2|ANKH_MOUSE	Ankh	1	1	130000	0.000318			sp|Q8BMF4|ODP2_MOUSE	Dlat	1	1	63000	0.000249			sp|B9EJ86|OSBL8_MOUSE	Osbpl8	2	2	230000	0.00043			sp|Q11011|PSA_MOUSE	Npepps	2	2	270000	0.000632			sp|Q6P2L7|CASC4_MOUSE	Casc4	2	2	150000	0.000473		sp|Q9WUH1|TM115_MOUSE	Tmem115
[truncated: 957 more rows]
[truncated: 22 more columns]

## Sheet: Filtered peptides
reference	Gene Symbol	Sum Peptide Intensity uninfected sample 1	Sum Peptide Intensity uninfected sample 2	Sum Peptide Intensity uninfected sample 3	Sum Peptide Intensity SV-Tag infected sample 1	Sum Peptide Intensity SV-Tag infected sample 2	Sum Peptide Intensity SV-Tag infected sample 3	average uninfected	average SV-Tag infected	fold change	log2fold change	pvalue	neg log10 p value	adjusted log2 fold change	adjusted log10 pvalue	pvalue < 0.05	pvalue > 0.05
[truncated: 1,239 more rows]
