# Supplementary material for: Rapid purification and metabolomic profiling of synaptic vesicles from mammalian brain
Source: eLife. 2020 Oct 12;9:e59699. doi: 10.7554/eLife.59699 (PMC7575323; doi:10.7554/eLife.59699)
Supplement: Supplementary file 2. [file elife-59699-supp2.xlsx]

## Sheet: Sheet1
Position in figure	Metabolite
1	1-Methylnicotinamide
2	2,3-Diphosphoglyceric acid
3	3-Hydroxybutyric acid
4	3-Phosphoglyceric acid
5	4-Hydroxyproline
6	4,5-Dihydroorotic acid
7	5-Phosphoribosylamine
8	5'-Methylthioadenosine
9	6-Phosphogluconic acid
10	Acetoacetic acid
11	Acetyl-CoA
12	Acetylcholine
13	Acetylcysteine
14	Adenine
15	Adenosine
16	Adenosine diphosphate ribose
17	Adenosine monophosphate
18	Adenosine triphosphate
19	Adenylsuccinic acid
20	ADP
21	Adrenochrome
22	Allantoin
23	Aminoadipic acid
24	Argininosuccinic acid
25	Beta-Alanine
26	Betaine
27	Butyrylcarnitine
28	Carbamoyl phosphate
29	Carnosine
30	CDP
31	Choline
32	cis-Aconitic acid
33	Citric acid
34	Citrulline
35	Creatine
36	Creatinine
37	Cyclic AMP
38	Cytidine
39	Cytidine monophosphate
40	Cytidine triphosphate
41	Cytosine
42	D-2-Hydroxyglutaric acid
43	D-Glucose
44	D-Glyceraldehyde 3-phosphate
45	D-Ribose 5-phosphate
46	D-Sedoheptulose 7-phosphate
47	Dihydrofolic acid
48	Dihydroxyacetone phosphate
49	dTDP
50	Epinephrine
51	FAD
52	Folic acid
53	Fructose 1,6-bisphosphate
54	Fructose 6-phosphate
55	Fumaric acid
56	Gamma-Aminobutyric acid
57	Gamma-Aminobutyric acid-13C-4
58	Glucose 6-phosphate
59	Glutathione
60	Glycerol 3-phosphate
61	Glycine
62	Guanidoacetic acid
63	Guanine
64	Guanosine
65	Guanosine diphosphate
66	Guanosine monophosphate
67	Guanosine triphosphate
68	Homocysteine
69	Hypotaurine
70	Hypoxanthine
71	Inosine
72	Inosinic acid
73	L-Acetylcarnitine
74	L-Alanine
75	L-Arginine
76	L-Asparagine
77	L-Aspartic acid
78	L-Carnitine
79	L-Cystathionine
80	L-Cysteine
81	L-Cystine
82	L-Glutamic acid
83	L-Glutamine
84	L-Histidine
85	L-Isoleucine
86	L-Kynurenine
87	L-Lactic acid
88	L-Leucine
89	L-Lysine
90	L-Malic acid
91	L-Methionine
92	L-Phenylalanine
93	L-Proline
94	L-Serine
95	L-Threonine
96	L-Tryptophan
97	L-Tyrosine
98	L-Valine
99	N-Acetyl-L-alanine
100	N-Acetyl-L-methionine
101	N-Acetyl-L-phenylalanine
102	N-Acetylglutamic acid
103	N-Acetylglutamine
104	N-Acetylornithine
105	N-Acetylserine
106	N6-Acetyl-L-lysine
107	NAD
108	NADH
109	NADP
110	NADPH
111	Niacinamide
112	Nicotinic acid
113	O-Phosphoethanolamine
114	Ornithine
115	Orotic acid
116	Orotidylic acid
117	Oxidized glutathione
118	Oxoadipic acid
119	Oxoglutaric acid
120	Palmitic acid
121	Pantothenic acid
122	Phenol
123	Phosphocreatine
124	Phosphoenolpyruvic acid
125	Phosphoribosyl pyrophosphate
126	Phosphorylcholine
127	Phosphoserine
128	Pipecolic acid
129	Propionylcarnitine
130	Pyruvic acid
131	Ribose 1-phosphate
132	S-Adenosylhomocysteine
133	S-Adenosylmethionine
134	Saccharopine
135	Sarcosine
136	Serotonin
137	Succinic acid
138	Taurine
139	Thymidine
140	Uracil
141	Ureidopropionic acid
142	Ureidosuccinic acid
143	Uric acid
144	Uridine
145	Uridine 5'-diphosphate
146	Uridine 5'-monophosphate
147	Uridine diphosphate glucose
148	Uridine diphosphate-N-acetylglucosamine
149	Uridine triphosphate
150	Valerylcarnitine
151	Xanthine
152	Xanthosine
153	Xanthylic acid
