# Supplementary material for: Rapid purification and metabolomic profiling of synaptic vesicles from mammalian brain
Source: eLife. 2020 Oct 12;9:e59699. doi: 10.7554/eLife.59699 (PMC7575323; doi:10.7554/eLife.59699)
Supplement: Supplementary file 3. [file elife-59699-supp3.xlsx]

## Sheet: Figure 2A and B
Mass isotopmer abundances											Calculated concentration (nM)
	uninfected + DMSO sample 1	infected + DMSO sample 1	infected +BafA sample 1	uninfected + DMSO sample 2	infected +BafA sample 2	infected + DMSO sample 2	uninfected + DMSO sample 3	infected +BafA sample 3	infected + DMSO sample 3	Amino acid	uninfected + DMSO sample 1	infected + DMSO sample 1	infected +BafA sample 1	uninfected + DMSO sample 2	infected +BafA sample 2	infected + DMSO sample 2	uninfected + DMSO sample 3	infected +BafA sample 3	infected + DMSO sample 3	average uninfected samples	average infected DMSO samples	average infected BafA samples	stdev uninfected samples	stdev infected DMSO samples	stdev infected BafA samples	uninfected + DMSO sample 1-3	infected + DMSO sample 1-3	infected +BafA sample 1-3		infected/uninfected	BafA/DMSO
Ala_260 (M0)	0.1687	0.2015	0.2056	0.1634	0.2202	0.2145	0.1797	0.1486	0.1276	[Ala] (nM)	102.391	132.618	132.236	101.491	151.361	146.057	113.332	88.2528	74.5414	105.738	117.739	123.95	6.59227	38.0089	32.3598	102.391	132.618	132.236	Ratio	1.1135	1.05275
Ala_261 (M1)	0.005	0.0099	0.0147	0.0118	0.0106	0.0141	0.0152	0.0037	0.0081																	101.491	146.057	151.361	sum sqs	0.108102	0.172373
Ala_262 (M2)	0.017	0.0101	0.0116	0.0042	0.0273	0.0115	0.0186	0.0095	0.0105																	113.332	74.5414	88.2528	sqrt	0.328789	0.415179
Ala_263 (M3)	-0.0003	0.0306	-0.0019	0.0098	0.0129	0.0253	0.0034	0.0044	0.0036																				sqrt*R	0.366105	0.43708
Ala_264 (M4)	0.8238	0.7597	0.7774	0.805	0.7274	0.7343	0.7928	0.8419	0.8559
Ala_265 (M5)	-0.0082	-0.0088	0.0074	0.0041	-0.0039	-0.0048	0.0001	0.0008	0.0014
Ala_266 (M6)	-0.0058	-0.0001	-0.0084	-0.0023	0.0073	0.0004	-0.0025	-0.0055	-0.0029
Ala_267 (M7)	-0.0012	-0.0038	-0.0071	0.0064	-0.0002	0.0039	-0.0077	-0.0028	-0.0037
Ala_268 (M8)	0.0013	0.0008	0.0002	-0.0024	-0.0019	0.0016	-0.0001	-0.0007	-0.0008
Gly_246 (M0)	0.2959	0.3143	0.3137	0.2416	0.3339	0.3394	0.2817	0.2414	0.2141	[Gly] (nM)	216.112	237.746	249.126	170.766	264.412	272.217	208.327	166.759	134.03	198.402	214.664	226.766	24.2474	71.9267	52.5267	216.112	237.746	249.126	Ratio	1.08197	1.05637
Gly_247 (M1)	0.0114	0.0071	0.0182	0.0185	0.0187	0.0086	0.023	0.012	0.0109																	170.766	272.217	264.412	sum sqs	0.127205	0.165923
Gly_248 (M2)	0.0121	0.0157	0.0283	0.0265	0.019	0.0133	0.0048	0.0164	-0.0209																	208.327	134.03	166.759	sqrt	0.356659	0.407337
Gly_249 (M3)	0.6846	0.661	0.6296	0.7074	0.6314	0.6234	0.6761	0.7238	0.7987																				sqrt*R	0.385893	0.4303
Gly_250 (M4)	-0.0031	-0.0001	0.0059	0.003	-0.004	0.0064	0.0129	0.0053	0.0052
Gly_251 (M5)	-0.0035	0.0021	0.0025	-0.001	0.0048	0.0026	-0.0001	0.0031	-0.0014
Gly_252 (M6)	0.0042	0.0013	0.0039	0.0064	-0.0029	0.0095	0.0036	-0.0007	-0.0067
Val_288 (M0)	0.0766	0.0973	0.086	0.079	0.1079	0.1021	0.0904	0.0615	0.0454	[Val] (nM)	45.4007	61.0797	52.4326	47.6938	64.8126	62.7381	55.7337	34.1325	25.5688	49.6094	49.7956	50.4593	5.42631	20.9973	15.4349	45.4007	61.0797	52.4326	Ratio	1.00375	1.01333
Val_289 (M1)	0.0017	0.0322	0.0175	0.0278	0.0226	0.0114	0.0059	0.009	0.0058																	47.6938	62.7381	64.8126	sum sqs	0.189771	0.271375
Val_290 (M2)	0.0045	0.0061	0.0083	0.0082	-0.0004	0.0043	0.0038	0.0053	0.0145																	55.7337	25.5688	34.1325	sqrt	0.435627	0.520936
Val_291 (M3)	0.0028	0.0076	0.013	0.0071	-0.0026	0.002	0.0156	0.0036	0.0043																				sqrt*R	0.437262	0.52788
Val_292 (M4)	0.0103	0.0014	-0.0022	-0.0026	0	-0.0004	0.0015	0.0001	-0.0013
Val_293 (M5)	0.0658	0.0708	0.0533	0.0591	0.0379	0.0706	0.0591	0.0199	0.0296
Val_294 (M6)	0.8436	0.7965	0.8201	0.8282	0.8324	0.8137	0.811	0.9009	0.8878
Val_295 (M7)	-0.0035	-0.0051	0.0121	0.0056	0.0186	0.0136	0.0264	0.0068	0.0222
Val_296 (M8)	0.0079	0.001	0.0013	-0.0046	-0.0083	-0.0102	-0.0046	0.003	0.0028
Leu_274 (M0)	0.0282	0.0483	0.0281	0.043	0.0463	0.0177	0.0327	0.0358	0.0223	[Leu] (nM)	15.2153	25.0909	14.5235	23.8783	25.3615	9.10026	17.133	19.6898	11.5868	18.7422	15.2593	19.8583	4.55017	8.60469	5.42099	15.2153	25.0909	14.5235	Ratio	0.814171	1.30139
Leu_275 (M1)	0.1124	0.071	0.0766	0.0714	0.1005	0.1046	0.0766	0.046	0.0374																	23.8783	9.10026	25.3615	sum sqs	0.376921	0.3925
Leu_276 (M2)	-0.0125	-0.0118	-0.0183	0.0171	-0.0285	-0.0267	-0.0105	0.0037	-0.0042																	17.133	11.5868	19.6898	sqrt	0.613939	0.626498
Leu_277 (M3)	-0.0062	-0.0004	0.0075	0.0014	0.0042	0.0047	-0.0019	-0.0028	0																				sqrt*R	0.499851	0.815316
Leu_278 (M4)	0.0008	0.0009	0.0076	0.0045	0.0108	0.0061	0.0039	0.0102	0.0101
Leu_279 (M5)	0.0364	0.0026	-0.0022	0.0368	0.0132	0.0013	0.0313	0.0243	-0.0013
Leu_280 (M6)	0.9267	0.9625	0.9674	0.9004	0.9128	0.9725	0.9543	0.9091	0.9623
Leu_281 (M7)	-0.0815	-0.056	-0.0456	-0.0511	-0.0417	-0.0481	-0.0904	-0.0188	-0.0107
Leu_282 (M8)	-0.0018	-0.0152	-0.0192	-0.0235	-0.0152	-0.0333	0.008	-0.0003	-0.0094
Ile_274 (M0)	0.0404	0.0624	0.0407	0.0483	0.0904	0.0712	0.0512	0.0369	0.033	[Ile] (nM)	21.8733	32.6257	21.2799	25.4693	50.9985	38.8011	27.8382	19.7326	16.8867	25.0603	29.4378	30.6704	3.0034	11.2996	17.6217	21.8733	32.6257	21.2799	Ratio	1.17468	1.04187
Ile_275 (M1)	0.0035	-0.0032	0.0038	0.0019	0.0019	0.0073	0.0105	0	-0.0003																	25.4693	38.8011	50.9985	sum sqs	0.161702	0.477449
Ile_276 (M2)	-0.0044	-0.0017	0.0002	-0.0022	0.0002	-0.0085	-0.0074	0	0.0007																	27.8382	16.8867	19.7326	sqrt	0.402122	0.690977
Ile_277 (M3)	0	0.0056	-0.0009	-0.0004	-0.0016	0.0005	-0.0001	0.0013	0.0015																				sqrt*R	0.472366	0.719907
Ile_278 (M4)	0.006	0.0024	0.0067	0.0035	0.0105	0.0056	0.0081	0.0039	0.009
Ile_279 (M5)	0.0432	0.0375	0.0375	0.0445	0.0312	0.0456	0.0332	0.0405	0.0128
Ile_280 (M6)	0.9235	0.9563	0.9563	0.9482	0.8863	0.9175	0.9196	0.935	0.9771
Ile_281 (M7)	-0.0108	-0.0344	-0.035	-0.0258	-0.0106	-0.0336	-0.0091	0.001	-0.0259
Ile_282 (M8)	0.0082	-0.0231	-0.0034	-0.0136	-0.0007	0.0009	0.0027	-0.0121	-0.0006
Ser_390 (M0)	0.1475	0.0942	0.1772	0.0816	0.1124	0.1204	0.0955	0.1673	0.0672	[Ser] (nM)	92.7906	55.3987	107.368	45.6529	66.8173	70.9404	56.3023	103.005	37.1107	64.9153	54.4833	92.3966	24.721	16.9334	22.2595	92.7906	55.3987	107.368	Ratio	0.839298	1.69587
Ser_391 (M1)	-0.0024	0.0015	-0.0045	-0.0124	0.0018	0.0025	0.0106	0.0043	0.0009																	45.6529	70.9404	66.8173	sum sqs	0.241621	0.154636
Ser_392 (M2)	0.0006	-0.0017	-0.0123	-0.0061	0.0052	0.0011	-0.0079	-0.0023	0.0004																	56.3023	37.1107	103.005	sqrt	0.491549	0.393238
Ser_393 (M3)	0.005	0.0366	0.008	0.012	0.0057	0.0088	0.0111	-0.0037	0.0057																				sqrt*R	0.412556	0.66688
Ser_394 (M4)	0.7948	0.8502	0.8252	0.8937	0.8411	0.8486	0.8481	0.8121	0.9054
Ser_395 (M5)	0.002	-0.0118	-0.0082	0.0173	0.0125	-0.0018	0.0115	0.0019	0.0005
Ser_396 (M6)	0.0282	0.0095	-0.0015	0.0091	0.0136	0.0087	0.0193	0.014	0.0097
Ser_397 (M7)	0.0393	0.0264	0.0236	0.0085	0.0141	0.0187	0.0198	0.0113	0.0164
Ser_398 (M8)	-0.0127	-0.001	-0.0058	-0.0023	-0.0053	-0.0056	-0.0063	-0.0035	-0.0048
Thr_404 (M0)	0.6262	0.7524	0.7151	0.6833	0.8381	0.7759	0.7583	0.5977	0.6374	[Thr] (nM)	627.706	1146.95	1094.76	1080.49	1501.97	1648.75	1622.38	647.002	716.824	1110.19	1153.44	1081.25	498.001	468.724	427.645	627.706	1094.76	1094.76	Ratio	1.03896	0.937406
Thr_405 (M1)	-0.0677	-0.0689	-0.0338	0.0057	-0.0314	-0.031	-0.0124	-0.053	-0.0554																	1080.49	1648.75	1501.97	sum sqs	0.366353	0.321565
Thr_406 (M2)	-0.0223	0.0469	0.0682	0.0509	-0.0562	0.0051	0.0488	0.0494	0.0145																	1622.38	716.824	647.002	sqrt	0.605271	0.567067
Thr_407 (M3)	0.005	-0.0156	-0.0436	-0.0214	0.0143	0.0113	-0.0142	-0.0102	0.0212																				sqrt*R	0.628853	0.531572
Thr_408 (M4)	0.0241	0.0137	0.0195	0.0102	-0.0022	-0.0005	0.003	0.0111	-0.0084
Thr_409 (M5)	0.4988	0.328	0.3266	0.3162	0.279	0.2353	0.2337	0.4619	0.4446
Thr_410 (M6)	-0.0007	-0.0219	-0.0155	-0.0071	-0.0096	0.0497	0.0184	0.0024	0.0031
Met_320 (M0)	0.0088	0.0142	0.0087	0.0005	0.0305	0.0111	0.0036	0.017	0.0091	[Met] (nM)	4.39473	7.55078	4.51292	0.234632	16.674	5.60719	22.2222	9.26431	4.683	8.95053	5.94699	10.1504	11.6803	1.46378	6.12875	4.39473	7.55078	4.51292	Ratio	0.664429	1.70681
Met_321 (M1)	-0.0023	-0.0037	-0.0022	-0.0001	-0.0045	-0.0029	0.0329	0.0046	-0.0002																	0.234632	5.60719	16.674	sum sqs	1.76358	0.425151
Met_322 (M2)	0.0041	0.0639	0.0064	0.0637	0.0365	0.0004	-0.0038	0.0103	0.0057																	22.2222	4.683	9.26431	sqrt	1.328	0.652036
Met_323 (M3)	0.0196	0.0111	0.0203	-0.0106	-0.0088	0.0122	0.0606	0.0116	0.0156																				sqrt*R	0.88236	1.1129
Met_324 (M4)	-0.005	0.022	0.0204	0.029	-0.0031	-0.0028	-0.0133	0.0118	0.0075
Met_325 (M5)	0.0709	0.0672	0.0839	0.0792	0.0395	0.0426	0.3688	0.0436	0.0382
Met_326 (M6)	1.0012	0.9403	0.9639	1.0655	0.9146	0.9898	0.081	0.9175	0.9716
Met_327 (M7)	-0.0746	-0.0831	-0.0675	-0.1544	-0.0107	-0.0399	0.466	0.0057	-0.0408
Met_328 (M8)	-0.0153	-0.0305	-0.0296	-0.0919	0.0302	0.0056	0.0812	-0.0045	0.0102
Phe_336 (M0)	0.0122	0.0392	0.0465	0.0416	0.0778	0.037	0.0442	0.0253	0.0236	[Phe] (nM)	5.56265	18.9427	21.9174	19.137	41.0597	17.2994	21.3609	11.6622	10.8696	15.3535	15.7039	24.8798	8.55174	4.26651	14.921	5.56265	18.9427	21.9174	Ratio	1.02282	1.58431
Phe_337 (M1)	0.0201	0.0152	-0.0086	-0.0122	-0.0042	0.0328	-0.013	0.0024	0.0053																	19.137	17.2994	41.0597	sum sqs	0.38405	0.43348
Phe_338 (M2)	-0.007	0.0023	-0.0026	-0.0011	-0.0048	-0.0133	-0.0012	-0.0035	0.0022																	21.3609	10.8696	11.6622	sqrt	0.619717	0.658392
Phe_339 (M3)	0.0285	0.0164	0.0226	0.0051	0.0275	0.0456	0.0046	0.0161	0.0004																				sqrt*R	0.63386	1.0431
Phe_340 (M4)	-0.0071	-0.0049	-0.0056	0.0097	-0.0011	-0.0113	-0.0001	0.0022	0
Phe_341 (M5)	-0.001	-0.0005	-0.0008	-0.0029	0.0384	-0.0016	0.0446	-0.0021	0.0035
Phe_342 (M6)	0.0212	0.0003	0.0057	0.005	-0.0032	0.0007	0.0392	0	-0.0009
Phe_343 (M7)	0.0054	0.0127	-0.0012	-0.001	0.0045	0	-0.0132	0.0001	-0.0001
Phe_344 (M8)	0.014	-0.0028	0.0042	0.0355	0.0453	0	0.0139	0.0208	0.0202
Phe_345 (M9)	0.0663	0.1272	0.1245	0.0816	0.0906	0.0849	0.0829	0.1032	0.1102
Phe_346 (M10)	1.0966	1.0347	1.0608	1.0869	0.9474	1.0694	1.0346	1.0847	1.0856
Asp_418 (M0)	0.0722	0.1378	0.1176	0.1459	0.1213	0.2534	0.184	0.1261	0.1315	[Asp] (nM)	36.5274	73.5012	67.8201	83.2572	66.663	155.156	124.797	70.2977	73.0312	81.527	100.563	68.2603	44.16	47.2794	1.8569	36.5274	73.5012	67.8201	Ratio	1.23349	0.678783
Asp_419 (M1)	-0.012	0.0089	0.0043	-0.0078	-0.0208	-0.0157	0.086	-0.0137	-0.0112																	83.2572	155.156	66.663	sum sqs	0.514436	0.22178
Asp_420 (M2)	-0.0051	-0.0259	-0.0152	-0.0213	-0.0128	-0.0363	-0.0602	0.0038	-0.0178																	124.797	73.0312	70.2977	sqrt	0.717242	0.470935
Asp_421 (M3)	0.0096	0.0139	0.0065	0.0027	0.0029	0.0048	-0.0009	-0.002	0.0053																				sqrt*R	0.88471	0.319663
Asp_422 (M4)	0.0006	0.0109	0.0017	0.002	0.0162	0.0024	0.0427	0.0223	0.0145
Asp_423 (M5)	0.9883	0.9374	0.867	0.8762	0.9098	0.8166	0.7372	0.8969	0.9003
Asp_424 (M6)	-0.0536	-0.0456	0.0297	0.0309	-0.0171	-0.0003	0.0215	-0.0028	0.0156
Asp_425 (M7)	0.0035	-0.0373	-0.0132	-0.0185	0.0291	-0.0126	0.013	-0.0245	-0.0222
Asp_426 (M8)	-0.0094	-0.0064	-0.01	-0.0225	-0.0314	-0.0184	-0.0276	-0.0137	-0.0221
Asp_427 (M9)	0.0019	0.0072	0.0047	0.0147	-0.0013	0.0059	0.0029	0.0081	0.0053
Asp_428 (M10)	0.0058	-0.0007	0.0105	-0.0013	0.0048	0.0005	0.0018	0.0002	0.0012
Glu_432 (M0)	0.0785	0.7817	0.2035	0.1069	0.2158	0.7781	0.0969	0.144	0.6973	[Glu] (nM)	50.9013	1810.33	155.915	64.4597	155.162	1917.45	57.5006	89.7644	1217.35	57.6205	1648.38	133.614	6.78	377.1	37.9767	50.9013	1810.33	155.915	Ratio	28.6074	0.0810579
Glu_433 (M1)	0.0074	-0.011	-0.002	0.0155	0.0031	-0.0067	-0.0036	0.0029	0.002																	64.4597	1917.45	155.162	sum sqs	0.0661813	0.133121
Glu_434 (M2)	0.1119	0.0064	0.1278	0.0053	0.0412	0.011	0.0238	0.0278	0.0023																	57.5006	1217.35	89.7644	sqrt	0.257257	0.364857
Glu_435 (M3)	-0.0029	0.0064	-0.0127	-0.0052	0.001	-0.0055	-0.0091	0.0006	0.0035																				sqrt*R	7.35947	0.0295746
Glu_436 (M4)	-0.009	-0.0009	0.0042	0.0021	-0.0076	0.0045	0.0041	0.0009	-0.0006
Glu_437 (M5)	0.0415	-0.0014	0.0208	0.0443	0.0584	0.0148	0.0555	0.0224	0.0097
Glu_438 (M6)	0.7711	0.2159	0.6526	0.8292	0.6954	0.2029	0.8426	0.8021	0.2864
Glu_439 (M7)	0.022	0.005	0.006	0.0108	-0.0006	0.0031	0.0097	-0.0017	0.0007
Glu_440 (M8)	-0.0123	-0.0015	-0.0149	0.0051	-0.0005	-0.0011	-0.0116	0.0026	0.001
Glu_441 (M9)	-0.0082	-0.0009	0.0051	-0.0144	-0.0031	-0.0018	-0.009	-0.0047	-0.0016
Glu_442 (M10)	-0.0006	0.0004	0.015	-0.0008	-0.0041	0.0007	0.0001	0.0049	-0.001

## Sheet: Figure 2C
SQ475	Metabolite	uninfected sample 1	uninfected sample 2	uninfected sample 3	uninfected sample 4	SV-tag infected sample 1	SV-tag infected sample 2	SV-tag infected sample 3	SV-tag infected sample 4	average uninfected sample	average SV-Tag infected sample	fold change	log2fold change	pvalue	-log10 pvalue	stdev SV-Tag infected samples	stdev uninfected samples	stdev infected/uninfected	SEM fold change	SEM log2 fold change
0	1-Methylnicotinamide	25710	25710	25710	25710	25710	25710	25710	25710	25710	25710	1	0	#DIV/0!	#DIV/0!	0	0	0	0	0
1	2,3-Diphosphoglyceric acid	10000	10000	10000	10000	10000	10000	10000	10000	10000	10000	1	0	#DIV/0!	#DIV/0!	0	0	0	0	0
2	3-Hydroxybutyric acid	33514	33514	33514	33514	33514	33514	33514	33514	33514	33514	1	0	#DIV/0!	#DIV/0!	0	0	0	0	0
3	3-Phosphoglyceric acid	10000	10000	10000	10000	10000	10000	10000	10000	10000	10000	1	0	#DIV/0!	#DIV/0!	0	0	0	0	0
4	4,5-Dihydroorotic acid	12319.5	12319.5	12319.5	12319.5	12319.5	12319.5	12319.5	12319.5	12319.5	12319.5	1	0	#DIV/0!	#DIV/0!	0	0	0	0	0
5	4-Hydroxyproline	47134.5	47134.5	47134.5	47134.5	47134.5	47134.5	47134.5	47134.5	47134.5	47134.5	1	0	#DIV/0!	#DIV/0!	0	0	0	0	0
6	5'-Methylthioadenosine	10000	10000	10000	10000	10000	10000	10000	10000	10000	10000	1	0	#DIV/0!	#DIV/0!	0	0	0	0	0
7	5-Phosphoribosylamine	10637	10637	10637	10637	10637	10637	10637	10637	10637	10637	1	0	#DIV/0!	#DIV/0!	0	0	0	0	0
8	6-Phosphogluconic acid	10000	10000	10000	10000	10000	10000	10000	10000	10000	10000	1	0	#DIV/0!	#DIV/0!	0	0	0	0	0
9	Acetoacetic acid	48927.5	48927.5	48927.5	48927.5	48927.5	48927.5	48927.5	48927.5	48927.5	48927.5	1	0	#DIV/0!	#DIV/0!	0	0	0	0	0
10	Acetyl-CoA	12312	12312	12312	12312	12312	12312	12312	12312	12312	12312	1	0	#DIV/0!	#DIV/0!	0	0	0	0	0
11	Acetylcysteine	10000	10000	10000	10000	10000	10000	10000	10000	10000	10000	1	0	#DIV/0!	#DIV/0!	0	0	0	0	0
12	Adenine	14640762	15765356	11508491	18046852	17629848	13859316	17061980	14160675	1.49904e+07	1.5678e+07	0.956143	-0.0647018	0.695083	0.157964	2.71958e+06	1.94379e+06	0.210103	0.105051	0.158509
13	Adenosine	16537247	16885416	16012586	20705736	22164196	14745431	15009415	14214867	1.75352e+07	1.65335e+07	1.06059	0.0848675	0.660275	0.180275	2.14389e+06	3.76833e+06	0.274314	0.137157	0.186571
14	Adenosine diphosphate ribose	10000	10000	10000	10000	10000	10000	10000	10000	10000	10000	1	0	#DIV/0!	#DIV/0!	0	0	0	0	0
15	Adenosine monophosphate	260283	186872		305367		186872	186872	186872	250841	186872	1.34231	0.424718	0.137589	0.861416	59808.9	0	0.320052	0.160026	0.171993
16	Adenosine triphosphate	17557	17557	17557	17557	17557	17557	17557	17557	17557	17557	1	0	#DIV/0!	#DIV/0!	0	0	0	0	0
17	Adenylsuccinic acid	10000	10000	10000	10000	10000	10000	10000	10000	10000	10000	1	0	#DIV/0!	#DIV/0!	0	0	0	0	0
18	ADP	10000	10000	10000	10000	10000	10000	10000	10000	10000	10000	1	0	#DIV/0!	#DIV/0!	0	0	0	0	0
19	Allantoin	14276.5	14276.5	14276.5	14276.5	14276.5	14276.5	14276.5	14276.5	14276.5	14276.5	1	0	#DIV/0!	#DIV/0!	0	0	0	0	0
20	Aminoadipic acid	37351.5	37351.5	37351.5	37351.5	37351.5	37351.5	37351.5	37351.5	37351.5	37351.5	1	0	#DIV/0!	#DIV/0!	0	0	0	0	0
21	Argininosuccinic acid	10000	10000	10000	10000	10000	10000	10000	10000	10000	10000	1	0	#DIV/0!	#DIV/0!	0	0	0	0	0
22	Beta-Alanine	45747	45747	45747	45747	45747	45747	45747	45747	45747	45747	1	0	#DIV/0!	#DIV/0!	0	0	0	0	0
23	Betaine	1.11229e+06	1.11229e+06	1.11229e+06	1.11229e+06	1.11229e+06	1.11229e+06	1.11229e+06	1.11229e+06	1.11229e+06	1.11229e+06	1	0	#DIV/0!	#DIV/0!	0	0	0	0	0
24	Butyrylcarnitine	49005.5	49005.5	49005.5	49005.5	49005.5	49005.5	49005.5	49005.5	49005.5	49005.5	1	0	#DIV/0!	#DIV/0!	0	0	0	0	0
25	Carbamoyl phosphate	9753068	10567545	10466090	10157936	10137051	9811060	9686031	9087578	1.02362e+07	9680430	1.05741	0.0805315	0.099694	1.00133	366142	438586	0.0610384	0.0305192	0.0416395
26	Carnosine	10000	10000	10000	10000	10000	10000	10000	10000	10000	10000	1	0	#DIV/0!	#DIV/0!	0	0	0	0	0
27	CDP	10000	10000	10000	10000	10000	10000	10000	10000	10000	10000	1	0	#DIV/0!	#DIV/0!	0	0	0	0	0
28	Choline	63455	78948		82070	120708	83150	191508	53611	74824.3	112244	0.666621	-0.585062	0.34081	0.467488	9969.1	59550.3	0.364652	0.182326	0.394588
29	cis-Aconitic acid	14992.5	14992.5	14992.5	14992.5	14992.5	14992.5	14992.5	14992.5	14992.5	14992.5	1	0	#DIV/0!	#DIV/0!	0	0	0	0	0
30	Citric acid	37744	37744	37744	37744	37744	37744	37744	37744	37744	37744	1	0	#DIV/0!	#DIV/0!	0	0	0	0	0
31	Citrulline	934016	934016	934016	934016	934016	1225536	5036136	934016	934016	2032426	0.459557	-1.12168	0.315724	0.500692	0	2.00718e+06	0.45385	0.226925	0.712388
32	Creatine	338459	338459	338459	338459	338459	338459	434655	338459	338459	362508	0.933659	-0.0990318	0.355918	0.44865	0	48098	0.123879	0.0619395	0.0957093
33	Creatinine	229546	229546	229546	229546	229546	229546	266034	229546	229546	238668	0.96178	-0.0562219	0.355918	0.44865	0	18244	0.0735193	0.0367597	0.0551405
34	Cyclic AMP	16425	17671	11119	17926	21660	15904	13542	11979	15785.2	15771.2	1.00089	0.0012801	0.995958	0.0017588	3179.2	4244.44	0.336441	0.16822	0.242475
35	Cytidine	243386	243386	243386	243386	243386	243386	243386	243386	243386	243386	1	0	#DIV/0!	#DIV/0!	0	0	0	0	0
36	Cytidine monophosphate	14409	14409	14409	14409	14409	14409	14409	14409	14409	14409	1	0	#DIV/0!	#DIV/0!	0	0	0	0	0
37	Cytidine triphosphate	10000	10000	10000	10000	10000	10000	10000	10000	10000	10000	1	0	#DIV/0!	#DIV/0!	0	0	0	0	0
38	Cytosine	32039	32039	32039	32039	32039	32039	32039	32039	32039	32039	1	0	#DIV/0!	#DIV/0!	0	0	0	0	0
39	D-2-Hydroxyglutaric acid	69701	69701	69701	69701	69701	69701	69701	69701	69701	69701	1	0	#DIV/0!	#DIV/0!	0	0	0	0	0
40	D-Glucose	48182.5	48182.5	48182.5	48182.5	48182.5	48182.5	48182.5	48182.5	48182.5	48182.5	1	0	#DIV/0!	#DIV/0!	0	0	0	0	0
41	D-Glyceraldehyde 3-phosphate	10744.5	10744.5	10744.5	10744.5	10744.5	10744.5	10744.5	10744.5	10744.5	10744.5	1	0	#DIV/0!	#DIV/0!	0	0	0	0	0
42	Dihydrofolic acid	10750.5	10750.5	10750.5	10750.5	10750.5	10750.5	10750.5	10750.5	10750.5	10750.5	1	0	#DIV/0!	#DIV/0!	0	0	0	0	0
43	Dihydroxyacetone phosphate	10000	10000	10000	10000	10000	10000	10000	10000	10000	10000	1	0	#DIV/0!	#DIV/0!	0	0	0	0	0
44	D-Ribose 5-phosphate	10000	10000	10000	10000	10000	10000	10000	10000	10000	10000	1	0	#DIV/0!	#DIV/0!	0	0	0	0	0
45	D-Sedoheptulose 7-phosphate	10000	10000	10000	10000	10000	10000	10000	10000	10000	10000	1	0	#DIV/0!	#DIV/0!	0	0	0	0	0
46	dTDP	10000	10000	10000	10000	10000	10000	10000	10000	10000	10000	1	0	#DIV/0!	#DIV/0!	0	0	0	0	0
47	FAD	10000	10000	10000	10000	10000	10000	10000	10000	10000	10000	1	0	#DIV/0!	#DIV/0!	0	0	0	0	0
48	Folic acid	10000	10000	10000	10000	10000	10000	10000	10000	10000	10000	1	0	#DIV/0!	#DIV/0!	0	0	0	0	0
49	Fructose 1,6-bisphosphate	10000	10000	10000	10000	10000	10000	10000	10000	10000	10000	1	0	#DIV/0!	#DIV/0!	0	0	0	0	0
50	Fructose 6-phosphate	10000	10000	10000	10000	10000	10000	10000	10000	10000	10000	1	0	#DIV/0!	#DIV/0!	0	0	0	0	0
51	Fumaric acid	29514.5	29514.5	29514.5	29514.5	29514.5	29514.5	29514.5	29514.5	29514.5	29514.5	1	0	#DIV/0!	#DIV/0!	0	0	0	0	0
52	Glucose 6-phosphate	10000	10000	10000	10000	10000	10000	10000	10000	10000	10000	1	0	#DIV/0!	#DIV/0!	0	0	0	0	0
53	Glutathione	10000	10000	10000	10000	10000	10000	10000	10000	10000	10000	1	0	#DIV/0!	#DIV/0!	0	0	0	0	0
54	Glycerol 3-phosphate	10000	10000	10000	10000	10000	10000	10000	10000	10000	10000	1	0	#DIV/0!	#DIV/0!	0	0	0	0	0
55	Glycine	181123	181123	181123	181123	181123	181123		181123	181123	181123	1	0	#DIV/0!	#DIV/0!	0	0	0	0	0
56	Guanidoacetic acid	30081.5	30081.5	30081.5	30081.5	30081.5	30081.5	30081.5	30081.5	30081.5	30081.5	1	0	#DIV/0!	#DIV/0!	0	0	0	0	0
57	Guanine	293325	293325	293325	293325	293325	293325	293325	293325	293325	293325	1	0	#DIV/0!	#DIV/0!	0	0	0	0	0
58	Guanosine	139932	139932	139932	139932	139932	139932	139932	139932	139932	139932	1	0	#DIV/0!	#DIV/0!	0	0	0	0	0
59	Guanosine diphosphate	10000	10000	10000	10000	10000	10000	10000	10000	10000	10000	1	0	#DIV/0!	#DIV/0!	0	0	0	0	0
60	Guanosine monophosphate	19320	19320	19320	19320	19320	19320	19320	19320	19320	19320	1	0	#DIV/0!	#DIV/0!	0	0	0	0	0
61	Guanosine triphosphate	10000	10000	10000	10000	10000	10000	10000	10000	10000	10000	1	0	#DIV/0!	#DIV/0!	0	0	0	0	0
62	Homocysteine	10634.5	10634.5	10634.5	10634.5	10634.5	10634.5	10634.5	10634.5	10634.5	10634.5	1	0	#DIV/0!	#DIV/0!	0	0	0	0	0
63	Hypotaurine	10000	10000	10000	10000	10000	10000	10000	10000	10000	10000	1	0	#DIV/0!	#DIV/0!	0	0	0	0	0
64	Hypoxanthine	281689	251883	256063	317397	260803	223311	228880	290654	276758	250912	1.10301	0.141444	0.27848	0.555206	30126.9	31222.2	0.18236	0.0911798	0.11926
65	Inosine	16492	16124	12962	17907	21645	15203	19147	16326	15871.2	18080.2	0.877822	-0.187999	0.262252	0.581281	2086.24	2898.35	0.181979	0.0909894	0.14954
66	Inosinic acid	10716.5	10716.5	10716.5	10716.5	10716.5	10716.5	10716.5	10716.5	10716.5	10716.5	1	0	#DIV/0!	#DIV/0!	0	0	0	0	0
67	L-Acetylcarnitine	45520	45520	45520	45520	45520	45520	45520	45520	45520	45520	1	0	#DIV/0!	#DIV/0!	0	0	0	0	0
68	L-Alanine	446769	446769	446769	446769	446769	446769		446769	446769	446769	1	0	#DIV/0!	#DIV/0!	0	0	0	0	0
69	L-Arginine	443935	443935	443935	443935	443935	898024	1360878	443935	443935	786693	0.564305	-0.825452	0.169071	0.77193	0	438577	0.314597	0.157298	0.402147
70	L-Asparagine	33742.5	33742.5	33742.5	33742.5	33742.5	33742.5		33742.5	33742.5	33742.5	1	0	#DIV/0!	#DIV/0!	0	0	0	0	0
71	L-Aspartic acid	52391.5	52391.5	52391.5	52391.5	52391.5	52391.5		52391.5	52391.5	52391.5	1	0	#DIV/0!	#DIV/0!	0	0	0	0	0
72	L-Carnitine	47819	47819	47819	47819	47819	47819	47819	47819	47819	47819	1	0	#DIV/0!	#DIV/0!	0	0	0	0	0
73	L-Cystathionine	10000	10000	10000	10000	10000	10000	10000	10000	10000	10000	1	0	#DIV/0!	#DIV/0!	0	0	0	0	0
74	L-Cysteine	10000	10000	10000	10000	10000	10000	10000	10000	10000	10000	1	0	#DIV/0!	#DIV/0!	0	0	0	0	0
75	L-Cystine	10000	10000	10000	10000	10000	10000	10000	10000	10000	10000	1	0	#DIV/0!	#DIV/0!	0	0	0	0	0
76	L-Glutamic acid	1141368	881419	1167132	1769020		548622	548622	548622	1.23973e+06	548622	2.25972	1.17615	0.0265726	1.57557	375713	0	0.68483	0.342415	0.218611
77	L-Glutamine	688918	688918	688918	688918	688918	1186416		688918	688918	854751	0.805987	-0.311171	0.285591	0.544256	0	287230	0.270844	0.135422	0.242401
78	L-Histidine	2133184	2133184	2133184	2133184	2133184	2133184		2133184	2133184	2133184	1	0	#DIV/0!	#DIV/0!	0	0	0	0	0
79	L-Isoleucine	220922	220922	220922	220922	220922	220922		220922	220922	220922	1	0	#DIV/0!	#DIV/0!	0	0	0	0	0
80	L-Kynurenine	11037.5	11037.5	11037.5	11037.5	11037.5	11037.5	11037.5	11037.5	11037.5	11037.5	1	0	#DIV/0!	#DIV/0!	0	0	0	0	0
81	L-Lactic acid	4344502	4344502	4344502	4344502	4344502	4344502	4344502	4344502	4344502	4344502	1	0	#DIV/0!	#DIV/0!	0	0	0	0	0
82	L-Leucine	580183	580183	580183	580183	580183	580183		606880	580183	589082	0.984893	-0.0219604	0.285591	0.544256	0	15413.5	0.0257701	0.012885	0.0188743
83	L-Lysine	39540	39540	39540	39540	39540	39540	46222	39540	39540	41210.5	0.959464	-0.0596991	0.355918	0.44865	0	3341	0.0777853	0.0388926	0.0584808
84	L-Malic acid	76009	76009	76009	76009	76009	76009	76009	76009	76009	76009	1	0	#DIV/0!	#DIV/0!	0	0	0	0	0
85	L-Methionine	39888.5	39888.5	39888.5	39888.5	39888.5	39888.5	84518	58471	39888.5	55691.5	0.71624	-0.481484	0.185162	0.732447	0	21120	0.271621	0.135811	0.273558
86	L-Phenylalanine	154087	154087	154087	154087	154087	154087	441914	329138	154087	269806	0.571102	-0.80818	0.152626	0.816372	0	141331	0.299156	0.149578	0.377858
87	L-Proline	2.88563e+06	2.88563e+06	2.88563e+06	2.88563e+06	2.88563e+06	2.88563e+06		2.88563e+06	2.88563e+06	2.88563e+06	1	0	#DIV/0!	#DIV/0!	0	0	0	0	0
88	L-Serine	535718	535718	535718	535718	535718	629856	1578978	535718	535718	820067	0.65326	-0.61427	0.305634	0.514799	0	507883	0.404576	0.202288	0.446744
89	L-Threonine	67276.5	67276.5	67276.5	67276.5	67276.5	67276.5	67276.5	67276.5	67276.5	67276.5	1	0	#DIV/0!	#DIV/0!	0	0	0	0	0
90	L-Tryptophan	44009.5	44009.5	44009.5	44009.5	44009.5	44009.5		44009.5	44009.5	44009.5	1	0	#DIV/0!	#DIV/0!	0	0	0	0	0
91	L-Tyrosine	79513.5	79513.5	79513.5	79513.5	79513.5	79513.5		79513.5	79513.5	79513.5	1	0	#DIV/0!	#DIV/0!	0	0	0	0	0
92	L-Valine	572394	572394	572394	572394	572394	572394		622664	572394	589151	0.971558	-0.0416276	0.285591	0.544256	0	29023.1	0.0478615	0.0239307	0.0355355
93	N6-Acetyl-L-lysine	332632	332632	332632	332632	332632	332632	332632	332632	332632	332632	1	0	#DIV/0!	#DIV/0!	0	0	0	0	0
94	N-Acetylglutamic acid	15692	15692	15692	15692	15692	15692	15692	15692	15692	15692	1	0	#DIV/0!	#DIV/0!	0	0	0	0	0
95	N-Acetylglutamine	19425	19425	19425	19425	19425	19425	19425	19425	19425	19425	1	0	#DIV/0!	#DIV/0!	0	0	0	0	0
96	N-Acetyl-L-alanine	50906	50906	50906	50906	50906	50906	50906	50906	50906	50906	1	0	#DIV/0!	#DIV/0!	0	0	0	0	0
97	N-Acetyl-L-methionine	10000	10000	10000	10000	10000	10000	10000	10000	10000	10000	1	0	#DIV/0!	#DIV/0!	0	0	0	0	0
98	N-Acetyl-L-phenylalanine	86087.5	86087.5	86087.5	86087.5	86087.5	86087.5	86087.5	86087.5	86087.5	86087.5	1	0	#DIV/0!	#DIV/0!	0	0	0	0	0
99	N-Acetylornithine	23301.5	23301.5	23301.5	23301.5	23301.5	23301.5	23301.5	23301.5	23301.5	23301.5	1	0	#DIV/0!	#DIV/0!	0	0	0	0	0
100	N-Acetylserine	33216	33216	33216	33216	33216	33216	33216	33216	33216	33216	1	0	#DIV/0!	#DIV/0!	0	0	0	0	0
101	NAD	10000	10000	10000	10000	10000	10000	10000	10000	10000	10000	1	0	#DIV/0!	#DIV/0!	0	0	0	0	0
102	NADH	10000	10000	10000	10000	10000	10000	10000	10000	10000	10000	1	0	#DIV/0!	#DIV/0!	0	0	0	0	0
103	NADP	10000	10000	10000	10000	10000	10000	10000	10000	10000	10000	1	0	#DIV/0!	#DIV/0!	0	0	0	0	0
104	NADPH	11212	11212	11212	11212	11212	11212	11212	11212	11212	11212	1	0	#DIV/0!	#DIV/0!	0	0	0	0	0
105	Niacinamide	57269.5	57269.5	57269.5	57269.5	57269.5	57269.5		57269.5	57269.5	57269.5	1	0	#DIV/0!	#DIV/0!	0	0	0	0	0
106	Nicotinic acid	24837	24837	24837	24837	24837	24837	24837	24837	24837	24837	1	0	#DIV/0!	#DIV/0!	0	0	0	0	0
107	O-Phosphoethanolamine	10689	10689	10689	10689	10689	10689	10689	10689	10689	10689	1	0	#DIV/0!	#DIV/0!	0	0	0	0	0
108	Ornithine	184700	184700	184700	184700	184700	279741	494366	299792	184700	314650	0.587002	-0.768563	0.0923339	1.03464	0	129903	0.242343	0.121172	0.297808
109	Orotic acid	13542	13542	13542	13542	13542	13542	13542	13542	13542	13542	1	0	#DIV/0!	#DIV/0!	0	0	0	0	0
110	Orotidylic acid	10000	10000	10000	10000	10000	10000	10000	10000	10000	10000	1	0	#DIV/0!	#DIV/0!	0	0	0	0	0
111	Oxidized glutathione	10000	10000	10000	10000	10000	10000	10000	10000	10000	10000	1	0	#DIV/0!	#DIV/0!	0	0	0	0	0
112	Oxoadipic acid	17228	17228	17228	17228	17228	17228	17228	17228	17228	17228	1	0	#DIV/0!	#DIV/0!	0	0	0	0	0
113	Oxoglutaric acid	32159.5	32159.5	32159.5	32159.5	32159.5	32159.5	32159.5	32159.5	32159.5	32159.5	1	0	#DIV/0!	#DIV/0!	0	0	0	0	0
114	Palmitic acid	104348902	104348902	104348902	104348902	104348902	104348902	104348902	104348902	104348902	104348902	1	0	#DIV/0!	#DIV/0!	0	0	0	0	0
115	Pantothenic acid	34428	34428	34501	34428	34428	34428	34428	67200	34446.2	42621	0.808199	-0.307218	0.356914	0.447436	36.5	16386	0.31072	0.15536	0.277329
116	Phenol	1539065	1539065	1539065	1539065	1539065	1539065	1539065	1539065	1539065	1539065	1	0	#DIV/0!	#DIV/0!	0	0	0	0	0
117	Phosphocreatine	10000	10000	10000	10000	10000	10000	10000	10000	10000	10000	1	0	#DIV/0!	#DIV/0!	0	0	0	0	0
118	Phosphoenolpyruvic acid	10000	10000	10000	10000	10000	10000	10000	10000	10000	10000	1	0	#DIV/0!	#DIV/0!	0	0	0	0	0
119	Phosphoribosyl pyrophosphate	10000	10000	10000	10000	10000	10000	10000	10000	10000	10000	1	0	#DIV/0!	#DIV/0!	0	0	0	0	0
120	Phosphorylcholine	11174	11174	11174	11174	11174	11174	11174	11174	11174	11174	1	0	#DIV/0!	#DIV/0!	0	0	0	0	0
121	Phosphoserine	10000	10000	10000	10000	10000	10000	10000	10000	10000	10000	1	0	#DIV/0!	#DIV/0!	0	0	0	0	0
122	Pipecolic acid	133236	133236	133236	133236	133236	133236	133236	133236	133236	133236	1	0	#DIV/0!	#DIV/0!	0	0	0	0	0
123	Propionylcarnitine	96693.5	96693.5	96693.5	96693.5	96693.5	96693.5	96693.5	96693.5	96693.5	96693.5	1	0	#DIV/0!	#DIV/0!	0	0	0	0	0
124	Pyruvic acid	104280	104280	104280	104280	104280	104280	104280	104280	104280	104280	1	0	#DIV/0!	#DIV/0!	0	0	0	0	0
125	Ribose 1-phosphate	10000	10000	10000	10000	10000	10000	10000	10000	10000	10000	1	0	#DIV/0!	#DIV/0!	0	0	0	0	0
126	Saccharopine	10000	10000	10000	10000	10000	10000	10000	10000	10000	10000	1	0	#DIV/0!	#DIV/0!	0	0	0	0	0
127	S-Adenosylhomocysteine	10000	10000	10000	10000	10000	10000	10000	10000	10000	10000	1	0	#DIV/0!	#DIV/0!	0	0	0	0	0
128	S-Adenosylmethionine	10000	10000	10000	10000	10000	10000	10000	10000	10000	10000	1	0	#DIV/0!	#DIV/0!	0	0	0	0	0
129	Sarcosine	315843	315843	315843	315843	315843	315843		315843	315843	315843	1	0	#DIV/0!	#DIV/0!	0	0	0	0	0
130	Succinic acid	212745	212745	212745	212745	212745	212745	212745	212745	212745	212745	1	0	#DIV/0!	#DIV/0!	0	0	0	0	0
131	Taurine	14912	14912	14912	14912	14912	14912	14912	14912	14912	14912	1	0	#DIV/0!	#DIV/0!	0	0	0	0	0
132	Thymidine	130152	130152	130152	130152	130152	130152	130152	130152	130152	130152	1	0	#DIV/0!	#DIV/0!	0	0	0	0	0
133	Uracil	15623.5	15623.5	15623.5	15623.5	15623.5	15623.5	15623.5	15623.5	15623.5	15623.5	1	0	#DIV/0!	#DIV/0!	0	0	0	0	0
134	Ureidopropionic acid	23618	23618	23618	23618	23618	23618	23618	23618	23618	23618	1	0	#DIV/0!	#DIV/0!	0	0	0	0	0
135	Ureidosuccinic acid	10000	10000	10000	10000	10000	10000	10000	10000	10000	10000	1	0	#DIV/0!	#DIV/0!	0	0	0	0	0
136	Uric acid	10000	10000	10000	13403	10000	10000	10000	10000	10850.8	10000	1.08508	0.117795	0.355918	0.44865	1701.5	0	0.17015	0.085075	0.113114
137	Uridine	38603	38603	38603	38603	38603	38603	38603	38603	38603	38603	1	0	#DIV/0!	#DIV/0!	0	0	0	0	0
138	Uridine 5'-diphosphate	10000	10000	10000	10000	10000	10000	10000	10000	10000	10000	1	0	#DIV/0!	#DIV/0!	0	0	0	0	0
139	Uridine 5'-monophosphate	15663.5	15663.5	15663.5	15663.5	15663.5	15663.5	15663.5	15663.5	15663.5	15663.5	1	0	#DIV/0!	#DIV/0!	0	0	0	0	0
140	Uridine diphosphate glucose	10000	10000	10000	10000	10000	10000	10000	10000	10000	10000	1	0	#DIV/0!	#DIV/0!	0	0	0	0	0
141	Uridine diphosphate-N-acetylglucosamine	10000	10000	10000	10000	10000	10000	10000	10000	10000	10000	1	0	#DIV/0!	#DIV/0!	0	0	0	0	0
142	Uridine triphosphate	10000	10000	10000	10000	10000	10000	10000	10000	10000	10000	1	0	#DIV/0!	#DIV/0!	0	0	0	0	0
143	Valerylcarnitine	35052	35052	35052	35052	35052	35052	35052	35052	35052	35052	1	0	#DIV/0!	#DIV/0!	0	0	0	0	0
144	Xanthine	26974.5	26974.5	26974.5	26974.5	26974.5	26974.5	26974.5	26974.5	26974.5	26974.5	1	0	#DIV/0!	#DIV/0!	0	0	0	0	0
145	Xanthosine	10000	10000	10000	10000	10000	10000	10000	10000	10000	10000	1	0	#DIV/0!	#DIV/0!	0	0	0	0	0
146	Xanthylic acid	10000	10000	10000	10000	10000	10000	10000	10000	10000	10000	1	0	#DIV/0!	#DIV/0!	0	0	0	0	0
147	Gamma-Aminobutyric acid	2686050	2686050	2938783	3223864	14029324	2686050	9171297	2686050	2.88369e+06	7.14318e+06	0.403698	-1.30865	0.173804	0.759939	256175	5.51556e+06	0.313769	0.156885	0.560658
148	Gamma-Aminobutyric acid-13C-4	12479071	14447385	14539823	12407579	12894657	13405749	11665466	12801441	1.34685e+07	1.26918e+07	1.06119	0.0856855	0.30769	0.511887	1.18469e+06	733997	0.111711	0.0558554	0.0759356
149	Acetylcholine	25210	25210	25210	25210	25210	25210	25210	25210	25210	25210	1	0	#DIV/0!	#DIV/0!	0	0	0	0	0
150	Serotonin	13835	13835	13835	13835	13835	13835	13835	13835	13835	13835	1	0	#DIV/0!	#DIV/0!	0	0	0	0	0
151	Adrenochrome	19214	19214	19214	19214	19214	19214	19214	37899	19214	23885.2	0.80443	-0.313962	0.355918	0.44865	0	9342.5	0.314645	0.157323	0.282149
152	Epinephrine	17934.5	17934.5	17934.5	17934.5	17934.5	17934.5	17934.5	17934.5	17934.5	17934.5	1	0	#DIV/0!	#DIV/0!	0	0	0	0	0

## Sheet: Figure 2D
		DMSO treated				BafA treated
SQ475	Metabolite	SV-tag infected sample 1	SV-tag infected sample 2	SV-tag infected sample 3	SV-tag infected sample 4	SV-tag infected sample 1	SV-tag infected sample 2	SV-tag infected sample 3	SV-tag infected sample 4	average DMSO treated samples	average BafA treated samples	fold change	log2fold change	pvalue	stdev infected	stdev uninfected	stdev ratio	SEM fold change	SEM log2 fold change	count infected	count uninfected	minimum
0	1-Methylnicotinamide	25710	25710	25710	25710	25710	25710	25710	25710	25710	25710	1	0	#DIV/0!	0	0	0	0	0	4	4	4
1	2,3-Diphosphoglyceric acid	10000	10000	10000	10000	10000	10000	10000	10000	10000	10000	1	0	#DIV/0!	0	0	0	0	0	4	4	4
2	3-Hydroxybutyric acid	33514	33514	33514	33514	33514	33514	33514	33514	33514	33514	1	0	#DIV/0!	0	0	0	0	0	4	4	4
3	3-Phosphoglyceric acid	10000	10000	10000	10000	10000	10000	10000	10000	10000	10000	1	0	#DIV/0!	0	0	0	0	0	4	4	4
5	4-Hydroxyproline	47134.5	47134.5	47134.5	47134.5	47134.5	47134.5	47134.5	47134.5	47134.5	47134.5	1	0	#DIV/0!	0	0	0	0	0	4	4	4
4	4,5-Dihydroorotic acid	12319.5	12319.5	12319.5	12319.5	12319.5	12319.5	12319.5	12319.5	12319.5	12319.5	1	0	#DIV/0!	0	0	0	0	0	4	4	4
7	5-Phosphoribosylamine	10637	10637	10637	10637	10637	10637	10637	10637	10637	10637	1	0	#DIV/0!	0	0	0	0	0	4	4	4
6	5'-Methylthioadenosine	10000	10000	10000	10000	10000	10000	10000	10000	10000	10000	1	0	#DIV/0!	0	0	0	0	0	4	4	4
8	6-Phosphogluconic acid	10000	10000	10000	10000	10000	10000	10000	10000	10000	10000	1	0	#DIV/0!	0	0	0	0	0	4	4	4
9	Acetoacetic acid	48927.5	48927.5	48927.5	48927.5	48927.5	48927.5	48927.5	48927.5	48927.5	48927.5	1	0	#DIV/0!	0	0	0	0	0	4	4	4
10	Acetyl-CoA	12312	12312	12312	12312	12312	12312	12312	12312	12312	12312	1	0	#DIV/0!	0	0	0	0	0	4	4	4
149	Acetylcholine	25210	25210	25210	25210	25210	25210	25210	25210	25210	25210	1	0	#DIV/0!	0	0	0	0	0	4	4	4
11	Acetylcysteine	10000	10000	10000	10000	10000	10000	10000	10000	10000	10000	1	0	#DIV/0!	0	0	0	0	0	4	4	4
12	Adenine	14640762	15765356	11508491	18046852	23069602	12934592	20462642	12637752	1.49904e+07	17276147	1.15248	0.204746	0.471564	2.71958e+06	5.29407e+06	0.410418	0.205209	0.256883	4	4	4
13	Adenosine	16537247	16885416	16012586	20705736	26391550	14979901	20000680	14915733	1.75352e+07	19071966	1.08764	0.121196	0.617458	2.14389e+06	5.4301e+06	0.337012	0.168506	0.223515	4	4	4
14	Adenosine diphosphate ribose	10000	10000	10000	10000	10000	10000	10000	10000	10000	10000	1	0	#DIV/0!	0	0	0	0	0	4	4	4
15	Adenosine monophosphate	260283	186872		305367		271255	186872	186872	250841	215000	0.857117	-0.222436	0.466076	59808.9	48718.3	0.281934	0.140967	0.273981	3	3	3
16	Adenosine triphosphate	17557	17557	17557	17557	17557	17557	17557	17557	17557	17557	1	0	#DIV/0!	0	0	0	0	0	4	4	4
17	Adenylsuccinic acid	10000	10000	10000	10000	10000	10000	10000	10000	10000	10000	1	0	#DIV/0!	0	0	0	0	0	4	4	4
18	ADP	10000	10000	10000	10000	10000	10000	10000	10000	10000	10000	1	0	#DIV/0!	0	0	0	0	0	4	4	4
151	Adrenochrome	19214	19214	19214	19214	19214	19214	19214	19214	19214	19214	1	0	#DIV/0!	0	0	0	0	0	4	4	4
19	Allantoin	14276.5	14276.5	14276.5	14276.5	14276.5	14276.5	14276.5	14276.5	14276.5	14276.5	1	0	#DIV/0!	0	0	0	0	0	4	4	4
20	Aminoadipic acid	37351.5	37351.5	37351.5	37351.5	37351.5	37351.5	37351.5	37351.5	37351.5	37351.5	1	0	#DIV/0!	0	0	0	0	0	4	4	4
21	Argininosuccinic acid	10000	10000	10000	10000	10000	10000	10000	10000	10000	10000	1	0	#DIV/0!	0	0	0	0	0	4	4	4
22	Beta-Alanine	45747	45747	45747	45747	45747	45747	45747	45747	45747	45747	1	0	#DIV/0!	0	0	0	0	0	4	4	4
23	Betaine	1.11229e+06	1.11229e+06	1.11229e+06	1.11229e+06	1.11229e+06	1.11229e+06	1.11229e+06	1.11229e+06	1.11229e+06	1.11229e+06	1	0	#DIV/0!	0	0	0	0	0	4	4	4
24	Butyrylcarnitine	49005.5	49005.5	49005.5	49005.5	49005.5	49005.5	49005.5	49005.5	49005.5	49005.5	1	0	#DIV/0!	0	0	0	0	0	4	4	4
25	Carbamoyl phosphate	9753068	10567545	10466090	10157936		9955397	9755728	9800380	1.02362e+07	9.83717e+06	0.961021	-0.0573596	0.132842	366142	104795	0.0358674	0.0179337	0.0310871	4	3	3
26	Carnosine	10000	10000	10000	10000	10000	10000	10000	10000	10000	10000	1	0	#DIV/0!	0	0	0	0	0	4	4	4
27	CDP	10000	10000	10000	10000	10000	10000	10000	10000	10000	10000	1	0	#DIV/0!	0	0	0	0	0	4	4	4
28	Choline	63455	78948		82070	109059	224473	401103	160960	74824.3	223899	2.99233	1.58127	0.105019	9969.1	127215	1.7463	0.873151	0.486099	3	4	3
29	cis-Aconitic acid	14992.5	14992.5	14992.5	14992.5	14992.5	14992.5	14992.5	14992.5	14992.5	14992.5	1	0	#DIV/0!	0	0	0	0	0	4	4	4
30	Citric acid	37744	37744	37744	37744	37744	37744	37744	37744	37744	37744	1	0	#DIV/0!	0	0	0	0	0	4	4	4
31	Citrulline	934016	934016	934016	934016	934016	934016	934016	934016	934016	934016	1	0	#DIV/0!	0	0	0	0	0	4	4	4
32	Creatine	338459	338459	338459	338459	542056	401440	410774	338459	338459	423182	1.25032	0.322298	0.0948125	0	85509.6	0.252644	0.126322	0.145758	4	4	4
33	Creatinine	229546	229546	229546	229546	229546	229546		229546	229546	229546	1	0	#DIV/0!	0	0	0	0	0	4	3	3
34	Cyclic AMP	16425	17671	11119	17926	33052	18665	18986	14306	15785.2	21252.2	1.34634	0.429038	0.257933	3179.2	8150.96	0.583232	0.291616	0.312487	4	4	4
35	Cytidine	243386	243386	243386	243386	243386	243386	243386	243386	243386	243386	1	0	#DIV/0!	0	0	0	0	0	4	4	4
36	Cytidine monophosphate	14409	14409	14409	14409	14409	14409	14409	14409	14409	14409	1	0	#DIV/0!	0	0	0	0	0	4	4	4
37	Cytidine triphosphate	10000	10000	10000	10000	10000	10000	10000	10000	10000	10000	1	0	#DIV/0!	0	0	0	0	0	4	4	4
38	Cytosine	32039	32039	32039	32039	32039	32039	32039	32039	32039	32039	1	0	#DIV/0!	0	0	0	0	0	4	4	4
39	D-2-Hydroxyglutaric acid	69701	69701	69701	69701	69701	69701	69701	69701	69701	69701	1	0	#DIV/0!	0	0	0	0	0	4	4	4
40	D-Glucose	48182.5	48182.5	48182.5	48182.5	48182.5	48182.5	48182.5	48182.5	48182.5	48182.5	1	0	#DIV/0!	0	0	0	0	0	4	4	4
41	D-Glyceraldehyde 3-phosphate	10744.5	10744.5	10744.5	10744.5	10744.5	10744.5	10744.5	10744.5	10744.5	10744.5	1	0	#DIV/0!	0	0	0	0	0	4	4	4
44	D-Ribose 5-phosphate	10000	10000	10000	10000	10000	10000	10000	10000	10000	10000	1	0	#DIV/0!	0	0	0	0	0	4	4	4
45	D-Sedoheptulose 7-phosphate	10000	10000	10000	10000	10000	10000	10000	10000	10000	10000	1	0	#DIV/0!	0	0	0	0	0	4	4	4
42	Dihydrofolic acid	10750.5	10750.5	10750.5	10750.5	10750.5	10750.5	10750.5	10750.5	10750.5	10750.5	1	0	#DIV/0!	0	0	0	0	0	4	4	4
43	Dihydroxyacetone phosphate	10000	10000	10000	10000	10000	10000	10000	10000	10000	10000	1	0	#DIV/0!	0	0	0	0	0	4	4	4
46	dTDP	10000	10000	10000	10000	10000	10000	10000	10000	10000	10000	1	0	#DIV/0!	0	0	0	0	0	4	4	4
152	Epinephrine	17934.5	17934.5	17934.5	17934.5	17934.5	17934.5	17934.5	17934.5	17934.5	17934.5	1	0	#DIV/0!	0	0	0	0	0	4	4	4
47	FAD	10000	10000	10000	10000	10000	10000	10000	10000	10000	10000	1	0	#DIV/0!	0	0	0	0	0	4	4	4
48	Folic acid	10000	10000	10000	10000	10000	10000	10000	10000	10000	10000	1	0	#DIV/0!	0	0	0	0	0	4	4	4
49	Fructose 1,6-bisphosphate	10000	10000	10000	10000	10000	10000	10000	10000	10000	10000	1	0	#DIV/0!	0	0	0	0	0	4	4	4
50	Fructose 6-phosphate	10000	10000	10000	10000	10000	10000	10000	10000	10000	10000	1	0	#DIV/0!	0	0	0	0	0	4	4	4
51	Fumaric acid	29514.5	29514.5	29514.5	29514.5	29514.5	29514.5	29514.5	29514.5	29514.5	29514.5	1	0	#DIV/0!	0	0	0	0	0	4	4	4
147	Gamma-Aminobutyric acid	2686050	2686050	2938783	3223864	2686050	2686050	2686050		2.88369e+06	2686050	0.931464	-0.102428	0.249017	256175	0	0.0827474	0.0413737	0.073995	4	3	3
148	Gamma-Aminobutyric acid-13C-4	12479071	14447385	14539823	12407579	13178571	14431249	12543796	13650872	1.34685e+07	13451122	0.998712	-0.00185887	0.981396	1.18469e+06	795419	0.105853	0.0529267	0.0764555	4	4	4
52	Glucose 6-phosphate	10000	10000	10000	10000	10000	10000	10000	10000	10000	10000	1	0	#DIV/0!	0	0	0	0	0	4	4	4
53	Glutathione	10000	10000	10000	10000	10000	10000	10000	10000	10000	10000	1	0	#DIV/0!	0	0	0	0	0	4	4	4
54	Glycerol 3-phosphate	10000	10000	10000	10000	10000	10000	10000	10000	10000	10000	1	0	#DIV/0!	0	0	0	0	0	4	4	4
55	Glycine	181123	181123	181123	181123	181123	181123	181123	181123	181123	181123	1	0	#DIV/0!	0	0	0	0	0	4	4	4
56	Guanidoacetic acid	30081.5	30081.5	30081.5	30081.5	30081.5	30081.5	30081.5	30081.5	30081.5	30081.5	1	0	#DIV/0!	0	0	0	0	0	4	4	4
57	Guanine	293325	293325	293325	293325	293325	293325	293325	293325	293325	293325	1	0	#DIV/0!	0	0	0	0	0	4	4	4
58	Guanosine	139932	139932	139932	139932	139932	139932	139932	139932	139932	139932	1	0	#DIV/0!	0	0	0	0	0	4	4	4
59	Guanosine diphosphate	10000	10000	10000	10000	10000	10000	10000	10000	10000	10000	1	0	#DIV/0!	0	0	0	0	0	4	4	4
60	Guanosine monophosphate	19320	19320	19320	19320	19320	19320	19320	19320	19320	19320	1	0	#DIV/0!	0	0	0	0	0	4	4	4
61	Guanosine triphosphate	10000	10000	10000	10000	10000	10000	10000	10000	10000	10000	1	0	#DIV/0!	0	0	0	0	0	4	4	4
62	Homocysteine	10634.5	10634.5	10634.5	10634.5	10634.5	10634.5	10634.5	10634.5	10634.5	10634.5	1	0	#DIV/0!	0	0	0	0	0	4	4	4
63	Hypotaurine	10000	10000	10000	10000	10000	10000	10000	10000	10000	10000	1	0	#DIV/0!	0	0	0	0	0	4	4	4
64	Hypoxanthine	281689	251883	256063	317397	423948	156073	345022	187389	276758	278108	1.00488	0.00702023	0.984241	30126.9	127631	0.473962	0.236981	0.340231	4	4	4
65	Inosine	16492	16124	12962	17907	23747	13988	21137	13943	15871.2	18203.8	1.14696	0.19782	0.422921	2086.24	5008.6	0.349741	0.174871	0.219959	4	4	4
66	Inosinic acid	10716.5	10716.5	10716.5	10716.5	10716.5	10716.5	10716.5	10716.5	10716.5	10716.5	1	0	#DIV/0!	0	0	0	0	0	4	4	4
67	L-Acetylcarnitine	45520	45520	45520	45520	45520	45520	45520	45520	45520	45520	1	0	#DIV/0!	0	0	0	0	0	4	4	4
68	L-Alanine	446769	446769	446769	446769	446769	446769	446769	446769	446769	446769	1	0	#DIV/0!	0	0	0	0	0	4	4	4
69	L-Arginine	443935	443935	443935	443935	443935		443935	443935	443935	443935	1	0	#DIV/0!	0	0	0	0	0	4	3	3
70	L-Asparagine	33742.5	33742.5	33742.5	33742.5	33742.5	33742.5	33742.5	33742.5	33742.5	33742.5	1	0	#DIV/0!	0	0	0	0	0	4	4	4
71	L-Aspartic acid	52391.5	52391.5	52391.5	52391.5	52391.5	52391.5	52391.5	52391.5	52391.5	52391.5	1	0	#DIV/0!	0	0	0	0	0	4	4	4
72	L-Carnitine	47819	47819	47819	47819	47819	47819	47819	47819	47819	47819	1	0	#DIV/0!	0	0	0	0	0	4	4	4
73	L-Cystathionine	10000	10000	10000	10000	10000	10000	10000	10000	10000	10000	1	0	#DIV/0!	0	0	0	0	0	4	4	4
74	L-Cysteine	10000	10000	10000	10000	10000	10000	10000	10000	10000	10000	1	0	#DIV/0!	0	0	0	0	0	4	4	4
75	L-Cystine	10000	10000	10000	10000	10000	10000	10000	10000	10000	10000	1	0	#DIV/0!	0	0	0	0	0	4	4	4
76	L-Glutamic acid	1141368	881419	1167132	1769020	548622	548622	548622		1.23973e+06	548622	0.442532	-1.17615	0.0265726	375713	0	0.134113	0.0670566	0.25243	4	3	3
77	L-Glutamine	688918	688918	688918	688918	688918	688918	688918	688918	688918	688918	1	0	#DIV/0!	0	0	0	0	0	4	4	4
78	L-Histidine	2133184	2133184	2133184	2133184	2133184	2133184	2133184	2133184	2133184	2133184	1	0	#DIV/0!	0	0	0	0	0	4	4	4
79	L-Isoleucine	220922	220922	220922	220922	220922	220922	220922	220922	220922	220922	1	0	#DIV/0!	0	0	0	0	0	4	4	4
80	L-Kynurenine	11037.5	11037.5	11037.5	11037.5	11037.5	11037.5	11037.5	11037.5	11037.5	11037.5	1	0	#DIV/0!	0	0	0	0	0	4	4	4
81	L-Lactic acid	4344502	4344502	4344502	4344502	4344502	4344502	4344502	4344502	4344502	4344502	1	0	#DIV/0!	0	0	0	0	0	4	4	4
82	L-Leucine	580183	580183	580183	580183	580183	580183	580183	580183	580183	580183	1	0	#DIV/0!	0	0	0	0	0	4	4	4
83	L-Lysine	39540	39540	39540	39540	39540	39540	39540	39540	39540	39540	1	0	#DIV/0!	0	0	0	0	0	4	4	4
84	L-Malic acid	76009	76009	76009	76009	76009	76009	76009	76009	76009	76009	1	0	#DIV/0!	0	0	0	0	0	4	4	4
85	L-Methionine	39888.5	39888.5	39888.5	39888.5	39888.5	39888.5	39888.5	39888.5	39888.5	39888.5	1	0	#DIV/0!	0	0	0	0	0	4	4	4
86	L-Phenylalanine	154087	154087	154087	154087	154087	154087	154087	154087	154087	154087	1	0	#DIV/0!	0	0	0	0	0	4	4	4
87	L-Proline	2.88563e+06	2.88563e+06	2.88563e+06	2.88563e+06	2.88563e+06	2.88563e+06	2.88563e+06	2.88563e+06	2.88563e+06	2.88563e+06	1	0	#DIV/0!	0	0	0	0	0	4	4	4
88	L-Serine	535718	535718	535718	535718	535718	535718	535718	535718	535718	535718	1	0	#DIV/0!	0	0	0	0	0	4	4	4
89	L-Threonine	67276.5	67276.5	67276.5	67276.5	67276.5	67276.5	67276.5	67276.5	67276.5	67276.5	1	0	#DIV/0!	0	0	0	0	0	4	4	4
90	L-Tryptophan	44009.5	44009.5	44009.5	44009.5	44009.5	44009.5	44009.5	44009.5	44009.5	44009.5	1	0	#DIV/0!	0	0	0	0	0	4	4	4
91	L-Tyrosine	79513.5	79513.5	79513.5	79513.5	79513.5	79513.5	79513.5	79513.5	79513.5	79513.5	1	0	#DIV/0!	0	0	0	0	0	4	4	4
92	L-Valine	572394	572394	572394	572394	572394	572394	572394	572394	572394	572394	1	0	#DIV/0!	0	0	0	0	0	4	4	4
96	N-Acetyl-L-alanine	50906	50906	50906	50906	50906	50906	50906	50906	50906	50906	1	0	#DIV/0!	0	0	0	0	0	4	4	4
97	N-Acetyl-L-methionine	10000	10000	10000	10000	10000	10000	10000	10000	10000	10000	1	0	#DIV/0!	0	0	0	0	0	4	4	4
98	N-Acetyl-L-phenylalanine	86087.5	86087.5	86087.5	86087.5	86087.5	86087.5	86087.5	86087.5	86087.5	86087.5	1	0	#DIV/0!	0	0	0	0	0	4	4	4
94	N-Acetylglutamic acid	15692	15692	15692	15692	15692	15692	15692	15692	15692	15692	1	0	#DIV/0!	0	0	0	0	0	4	4	4
95	N-Acetylglutamine	19425	19425	19425	19425	19425	19425	19425	19425	19425	19425	1	0	#DIV/0!	0	0	0	0	0	4	4	4
99	N-Acetylornithine	23301.5	23301.5	23301.5	23301.5	23301.5	23301.5	23301.5	23301.5	23301.5	23301.5	1	0	#DIV/0!	0	0	0	0	0	4	4	4
100	N-Acetylserine	33216	33216	33216	33216	33216	33216	33216	33216	33216	33216	1	0	#DIV/0!	0	0	0	0	0	4	4	4
93	N6-Acetyl-L-lysine	332632	332632	332632	332632	332632	332632	332632	332632	332632	332632	1	0	#DIV/0!	0	0	0	0	0	4	4	4
101	NAD	10000	10000	10000	10000	10000	10000	10000	10000	10000	10000	1	0	#DIV/0!	0	0	0	0	0	4	4	4
102	NADH	10000	10000	10000	10000	10000	10000	10000	10000	10000	10000	1	0	#DIV/0!	0	0	0	0	0	4	4	4
103	NADP	10000	10000	10000	10000	10000	10000	10000	10000	10000	10000	1	0	#DIV/0!	0	0	0	0	0	4	4	4
104	NADPH	11212	11212	11212	11212	11212	11212	11212	11212	11212	11212	1	0	#DIV/0!	0	0	0	0	0	4	4	4
105	Niacinamide	57269.5	57269.5	57269.5	57269.5	57269.5	57269.5	57269.5	57269.5	57269.5	57269.5	1	0	#DIV/0!	0	0	0	0	0	4	4	4
106	Nicotinic acid	24837	24837	24837	24837	24837	24837	24837	24837	24837	24837	1	0	#DIV/0!	0	0	0	0	0	4	4	4
107	O-Phosphoethanolamine	10689	10689	10689	10689	10689	10689	10689	10689	10689	10689	1	0	#DIV/0!	0	0	0	0	0	4	4	4
108	Ornithine	184700	184700	184700	184700	184700		184700	184700	184700	184700	1	0	#DIV/0!	0	0	0	0	0	4	3	3
109	Orotic acid	13542	13542	13542	13542	13542	13542	13542	13542	13542	13542	1	0	#DIV/0!	0	0	0	0	0	4	4	4
110	Orotidylic acid	10000	10000	10000	10000	10000	10000	10000	10000	10000	10000	1	0	#DIV/0!	0	0	0	0	0	4	4	4
111	Oxidized glutathione	10000	10000	10000	10000	10000	10000	10000	10000	10000	10000	1	0	#DIV/0!	0	0	0	0	0	4	4	4
112	Oxoadipic acid	17228	17228	17228	17228	17228	17228	17228	17228	17228	17228	1	0	#DIV/0!	0	0	0	0	0	4	4	4
113	Oxoglutaric acid	32159.5	32159.5	32159.5	32159.5	32159.5	32159.5	32159.5	32159.5	32159.5	32159.5	1	0	#DIV/0!	0	0	0	0	0	4	4	4
114	Palmitic acid	104348902	104348902	104348902	104348902	104348902	104348902	104348902	104348902	104348902	104348902	1	0	#DIV/0!	0	0	0	0	0	4	4	4
115	Pantothenic acid	34428	34428	34501	34428	34428		34428	34428	34446.2	34428	0.99947	-0.000764558	0.436588	36.5	0	0.00105906	0.00052953	0.000882602	4	3	3
116	Phenol	1539065	1539065	1539065	1539065	1539065	1539065	1539065	1539065	1539065	1539065	1	0	#DIV/0!	0	0	0	0	0	4	4	4
117	Phosphocreatine	10000	10000	10000	10000	10000	10000	10000	10000	10000	10000	1	0	#DIV/0!	0	0	0	0	0	4	4	4
118	Phosphoenolpyruvic acid	10000	10000	10000	10000	10000	10000	10000	10000	10000	10000	1	0	#DIV/0!	0	0	0	0	0	4	4	4
119	Phosphoribosyl pyrophosphate	10000	10000	10000	10000	10000	10000	10000	10000	10000	10000	1	0	#DIV/0!	0	0	0	0	0	4	4	4
120	Phosphorylcholine	11174	11174	11174	11174	11174	11174	11174	11174	11174	11174	1	0	#DIV/0!	0	0	0	0	0	4	4	4
121	Phosphoserine	10000	10000	10000	10000	10000	10000	10000	10000	10000	10000	1	0	#DIV/0!	0	0	0	0	0	4	4	4
122	Pipecolic acid	133236	133236	133236	133236	133236	133236	133236	133236	133236	133236	1	0	#DIV/0!	0	0	0	0	0	4	4	4
123	Propionylcarnitine	96693.5	96693.5	96693.5	96693.5	96693.5	96693.5	96693.5	96693.5	96693.5	96693.5	1	0	#DIV/0!	0	0	0	0	0	4	4	4
124	Pyruvic acid	104280	104280	104280	104280	104280	104280	104280	104280	104280	104280	1	0	#DIV/0!	0	0	0	0	0	4	4	4
125	Ribose 1-phosphate	10000	10000	10000	10000	10000	10000	10000	10000	10000	10000	1	0	#DIV/0!	0	0	0	0	0	4	4	4
127	S-Adenosylhomocysteine	10000	10000	10000	10000	10000	10000	10000	10000	10000	10000	1	0	#DIV/0!	0	0	0	0	0	4	4	4
128	S-Adenosylmethionine	10000	10000	10000	10000	10000	10000	10000	10000	10000	10000	1	0	#DIV/0!	0	0	0	0	0	4	4	4
126	Saccharopine	10000	10000	10000	10000	10000	10000	10000	10000	10000	10000	1	0	#DIV/0!	0	0	0	0	0	4	4	4
129	Sarcosine	315843	315843	315843	315843	315843	315843	315843	315843	315843	315843	1	0	#DIV/0!	0	0	0	0	0	4	4	4
150	Serotonin	13835	13835	13835	13835	13835	13835	13835	13835	13835	13835	1	0	#DIV/0!	0	0	0	0	0	4	4	4
130	Succinic acid	212745	212745	212745	212745		212745	212745	212745	212745	212745	1	0	#DIV/0!	0	0	0	0	0	4	3	3
131	Taurine	14912	14912	14912	14912	14912	14912	14912	14912	14912	14912	1	0	#DIV/0!	0	0	0	0	0	4	4	4
132	Thymidine	130152	130152	130152	130152	130152	130152	130152	130152	130152	130152	1	0	#DIV/0!	0	0	0	0	0	4	4	4
133	Uracil	15623.5	15623.5	15623.5	15623.5	15623.5	15623.5	15623.5	15623.5	15623.5	15623.5	1	0	#DIV/0!	0	0	0	0	0	4	4	4
134	Ureidopropionic acid	23618	23618	23618	23618	23618	23618	23618	23618	23618	23618	1	0	#DIV/0!	0	0	0	0	0	4	4	4
135	Ureidosuccinic acid	10000	10000	10000	10000	10000	10000	10000	10000	10000	10000	1	0	#DIV/0!	0	0	0	0	0	4	4	4
136	Uric acid	10000	10000	10000		10000	10000	10000	10000	10000	10000	1	0	#DIV/0!	0	0	0	0	0	3	4	3
137	Uridine	38603	38603	38603	38603	38603	38603	38603	38603	38603	38603	1	0	#DIV/0!	0	0	0	0	0	4	4	4
138	Uridine 5'-diphosphate	10000	10000	10000	10000	10000	10000	10000	10000	10000	10000	1	0	#DIV/0!	0	0	0	0	0	4	4	4
139	Uridine 5'-monophosphate	15663.5	15663.5	15663.5	15663.5	15663.5	15663.5	15663.5	15663.5	15663.5	15663.5	1	0	#DIV/0!	0	0	0	0	0	4	4	4
140	Uridine diphosphate glucose	10000	10000	10000	10000	10000	10000	10000	10000	10000	10000	1	0	#DIV/0!	0	0	0	0	0	4	4	4
141	Uridine diphosphate-N-acetylglucosamine	10000	10000	10000	10000	10000	10000	10000	10000	10000	10000	1	0	#DIV/0!	0	0	0	0	0	4	4	4
142	Uridine triphosphate	10000	10000	10000	10000	10000	10000	10000	10000	10000	10000	1	0	#DIV/0!	0	0	0	0	0	4	4	4
143	Valerylcarnitine	35052	35052	35052	35052	35052	35052	35052	35052	35052	35052	1	0	#DIV/0!	0	0	0	0	0	4	4	4
144	Xanthine	26974.5	26974.5	26974.5	26974.5	26974.5	26974.5	26974.5	26974.5	26974.5	26974.5	1	0	#DIV/0!	0	0	0	0	0	4	4	4
145	Xanthosine	10000	10000	10000	10000	10000	10000	10000	10000	10000	10000	1	0	#DIV/0!	0	0	0	0	0	4	4	4
146	Xanthylic acid	10000	10000	10000	10000	10000	10000	10000	10000	10000	10000	1	0	#DIV/0!	0	0	0	0	0	4	4	4
																				0	0	0
																				0	0	0
																				0	0	0
																				0	0	0
																				0	0	0
																				0	0	0
																				0	0	0
																				0	0	0
																				0	0	0
																				0	0	0
																				0	0	0
																				0	0	0
																				0	0	0
																				0	0	0
																				0	0	0
																				0	0	0
																				0	0	0
																				0	0	0
																				0	0	0
																				0	0	0
																				0	0	0
																				0	0	0
																				0	0	0
																				0	0	0
																				0	0	0
																				0	0	0
																				0	0	0
																				0	0	0
																				0	0	0
																				0	0	0
																				0	0	0
																				0	0	0
																				0	0	0
																				0	0	0
																				0	0	0
																				0	0	0
																				0	0	0
																				0	0	0
																				0	0	0
																				0	0	0
																				0	0	0
																				0	0	0
																				0	0	0
																				0	0	0
																				0	0	0
																				0	0	0
																				0	0	0
																				0	0	0
																				0	0	0
																				0	0	0
																				0	0	0
																				0	0	0
																				0	0	0
																				0	0	0
																				0	0	0
																				0	0	0
																				0	0	0
																				0	0	0
																				0	0	0
																				0	0	0
																				0	0	0
																				0	0	0
																				0	0	0
																				0	0	0
																				0	0	0
																				0	0	0
																				0	0	0
																				0	0	0
																				0	0	0
																				0	0	0
																				0	0	0
																				0	0	0
																				0	0	0
																				0	0	0
																				0	0	0
																				0	0	0
																				0	0	0
																				0	0	0
																				0	0	0
																				0	0	0
																				0	0	0
																				0	0	0
																				0	0	0
																				0	0	0
																				0	0	0
																				0	0	0
																				0	0	0
																				0	0	0
																				0	0	0
																				0	0	0
																				0	0	0
																				0	0	0
																				0	0	0
																				0	0	0
																				0	0	0
																				0	0	0
																				0	0	0
																				0	0	0
																				0	0	0
																				0	0	0
																				0	0	0
																				0	0	0
																				0	0	0
																				0	0	0
																				0	0	0
																				0	0	0
																				0	0	0
																				0	0	0
																				0	0	0
																				0	0	0
																				0	0	0
																				0	0	0
																				0	0	0
																				0	0	0
																				0	0	0
																				0	0	0
																				0	0	0
																				0	0	0
																				0	0	0
																				0	0	0
																				0	0	0
																				0	0	0
																				0	0	0
																				0	0	0
																				0	0	0
																				0	0	0
																				0	0	0
																				0	0	0
																				0	0	0
																				0	0	0
																				0	0	0
																				0	0	0
																				0	0	0
																				0	0	0
																				0	0	0
																				0	0	0
																				0	0	0
																				0	0	0
																				0	0	0
																				0	0	0
																				0	0	0
																				0	0	0
																				0	0	0
																				0	0	0
																				0	0	0
																				0	0	0
																				0	0	0
																				0	0	0
																				0	0	0
																				0	0	0
																				0	0	0
																				0	0	0
																				0	0	0
																				0	0	0
																				0	0	0
																				0	0	0
																				0	0	0
																				0	0	0
																				0	0	0
																				0	0	0
																				0	0	0
																				0	0	0
																				0	0	0
																				0	0	0
																				0	0	0
																				0	0	0
																				0	0	0
																				0	0	0
																				0	0	0
																				0	0	0
																				0	0	0
																				0	0	0
																				0	0	0
																				0	0	0
																				0	0	0
																				0	0	0
																				0	0	0
																				0	0	0

## Sheet: Figure 2F
SQ273	Metabolite	sgAAVS1 infected sample 1	sgAAVS1 infected sample 2	sgAAVS1 infected sample 3	sgVGLUT1/2 infected sample 1	sgVGLUT1/2 infected sample 2	sgVGLUT1/2 infected sample 3	sgAAVS1_Mean	sgVGLUT1_2_Mean	fold change	Log2FoldChange	ttest_pval	stdev infected	stdev uninfected	stdev ratio	SEM fold change	SEM log2 fold change	count infected	count uninfected	minimum
131	1-Methylnicotinamide	36040	36040	36040	36040	36040	36040	36040	36040	1	0	NA	0	0	0	0	0	3	4	3
74	2,3-Diphosphoglyceric acid	11245	11245	11245	11245	11245	11245	11245	11245	1	0	NA	0	0	0	0	0	3	4	3
88	3-Hydroxybutyric acid	122619	122619	122619	122619	122619	122619	122619	122619	1	0	NA	0	0	0	0	0	3	4	3
72	3-Phosphoglyceric acid	10733.8	10733.8	10733.8	10733.8	10733.8	10733.8	10733.8	10733.8	1	0	NA	0	0	0	0	0	3	4	3
6	4-Hydroxyproline	133338	133338	133338	133338	133338	133338	133338	133338	1	0	NA	0	0	0	0	0	3	4	3
104	4,5-Dihydroorotic acid	35543.2	35543.2	35543.2	35543.2	35543.2	35543.2	35543.2	35543.2	1	0	NA	0	0	0	0	0	3	4	3
94	5-Phosphoribosylamine	10000	10000	10000	10000	10000	10000	10000	10000	1	0	NA	0	0	0	0	0	3	4	3
42	5'-Methylthioadenosine	10000	10000	10000	10000	10000	10000	10000	10000	1	0	NA	0	0	0	0	0	3	4	3
115	6-Phosphogluconic acid	10000	10000	10000	10000	10000	10000	10000	10000	1	0	NA	0	0	0	0	0	3	4	3
81	Acetoacetic acid	66447.4	66447.4	66447.4	66447.4	66447.4	66447.4	66447.4	66447.4	1	0	NA	0	0	0	0	0	3	4	3
60	Acetyl-CoA	12078.4	12078.4	12078.4	12078.4	12078.4	12078.4	12078.4	12078.4	1	0	NA	0	0	0	0	0	3	4	3
										#DIV/0!	#DIV/0!		#DIV/0!	#DIV/0!	#DIV/0!		#DIV/0!
109	Acetylcysteine	10000	10000	10000	10000	10000	10000	10000	10000	1	0	NA	0	0	0	0	0	3	4	3
102	Adenine	18686990	24093970	19160634	19257066	20822314	19437630	20647198	1.9839e+07	0.960857	-0.0576065	0.676372	2.99437e+06	856344	0.14539	0.072695	0.126035	3	4	3
27	Adenosine	14296044	25539624	17469434	19719080	20267936	17608972	1.91017e+07	1.91987e+07	1.00508	0.00730473	0.978885	5.79679e+06	1.4038e+06	0.313739	0.156869	0.260006	3	4	3
49	Adenosine diphosphate ribose	10000	10000	10000	10000	10000	10000	10000	10000	1	0	NA	0	0	0	0	0	3	4	3
30	Adenosine monophosphate	211419	2936019	1625092	3051292	2925120	2454689	1.59084e+06	2810367	1.76659	0.820967	0.205444	1.36262e+06	314420	1.52601	0.763005	0.719508	3	4	3
35	Adenosine triphosphate	12455.2	12455.2	12455.2	12455.2	12455.2	12455.2	12455.2	12455.2	1	0	1	2.2278e-12	2.2278e-12	2.52953e-16	1.26477e-16	2.10695e-16	3	4	3
46	Adenylsuccinic acid	10000	10000	10000	10000	10000	10000	10000	10000	1	0	NA	0	0	0	0	0	3	4	3
32	ADP	10000	10000	10000	10000	10000	10000	10000	10000	1	0	NA	0	0	0	0	0	3	4	3
										#DIV/0!	#DIV/0!		#DIV/0!	#DIV/0!	#DIV/0!		#DIV/0!
80	Allantoin	18662.2	18662.2	18662.2	18662.2	18662.2	18662.2	18662.2	18662.2	1	0	NA	0	0	0	0	0	3	4	3
111	Aminoadipic acid	57794.8	57794.8	57794.8	57794.8	57794.8	57794.8	57794.8	57794.8	1	0	1	8.91119e-12	8.91119e-12	2.18053e-16	1.09026e-16	1.81625e-16	3	4	3
38	Argininosuccinic acid	10000	10000	10000	10000	10000	10000	10000	10000	1	0	NA	0	0	0	0	0	3	4	3
0	Beta-Alanine	167854	167854	167854	167854	167854	167854	167854	167854	1	0	NA	0	0	0	0	0	3	4	3
3	Betaine	1.67183e+06	1.67183e+06	1.67183e+06	1.67183e+06	1.67183e+06	1.67183e+06	1.67183e+06	1.67183e+06	1	0	NA	0	0	0	0	0	3	4	3
44	Butyrylcarnitine	103031	103031	103031	103031	103031	103031	103031	103031	1	0	NA	0	0	0	0	0	3	4	3
146	Carbamoyl phosphate	9644739	10410927	8904714	10178232	10692466	9841132	9653460	1.02373e+07	1.06048	0.0847139	0.308098	753144	428727	0.0939027	0.0469514	0.0737549	3	4	3
140	Carnosine	10000	10000	10000	10000	10000	10000	10000	10000	1	0	NA	0	0	0	0	0	3	4	3
142	CDP	10000	10000	10000	10000	10000	10000	10000	10000	1	0	NA	0	0	0	0	0	3	4	3
96	Choline	279650	279650	279650	279650	279650	279650	279650	279650	1	0	NA	0	0	0	0	0	3	4	3
120	cis-Aconitic acid	21326.2	21326.2	21326.2	21326.2	21326.2	21326.2	21326.2	21326.2	1	0	NA	0	0	0	0	0	3	4	3
122	Citric acid	48636.4	48636.4	48636.4	48636.4	48636.4	48636.4	48636.4	48636.4	1	0	NA	0	0	0	0	0	3	4	3
114	Citrulline	145521	145521	145521	145521	152341	145521	145521	147795	1.01562	0.0223622	0.373901	0	3937.3	0.0270565	0.0135282	0.0221898	3	4	3
17	Creatine	306705	250840	212631	194419	196764	194419	256725	195201	0.760348	-0.395268	0.0875068	47312.3	1353.89	0.140225	0.0701125	0.153613	3	4	3
84	Creatinine	317489	317489	317489	317489	317489	317489	317489	317489	1	0	NA	0	0	0	0	0	3	4	3
23	Cyclic AMP	10000	11064	10000	10000	10000	10000	10354.7	10000	0.965748	-0.0502811	0.373901	614.301	0	0.0572939	0.028647	0.049415	3	4	3
137	Cytidine	17570.2	22877	17570.2	17570.2	17570.2	17570.2	19339.1	17570.2	0.908531	-0.138393	0.373901	3063.88	0	0.143938	0.0719689	0.131962	3	4	3
139	Cytidine monophosphate	10000	10000	10000	10000	10000	10000	10000	10000	1	0	NA	0	0	0	0	0	3	4	3
143	Cytidine triphosphate	10000	10000	10000	10000	10000	10000	10000	10000	1	0	NA	0	0	0	0	0	3	4	3
79	Cytosine	290908	290908	290908	290908	290908	290908	290908	290908	1	0	NA	0	0	0	0	0	3	4	3
107	D-2-Hydroxyglutaric acid	202080	202080	202080	202080	202080	202080	202080	202080	1	0	1	3.56448e-11	3.56448e-11	2.49453e-16	1.24726e-16	2.07779e-16	3	4	3
113	D-Glucose	33830.8	33830.8	33830.8	33830.8	33830.8	33830.8	33830.8	33830.8	1	0	NA	0	0	0	0	0	3	4	3
10	D-Glyceraldehyde 3-phosphate	10000	10000	10000	10000	10000	10000	10000	10000	1	0	NA	0	0	0	0	0	3	4	3
12	D-Ribose 5-phosphate	10000	10000	10000	10000	10000	10000	10000	10000	1	0	NA	0	0	0	0	0	3	4	3
130	D-Sedoheptulose 7-phosphate	10000	10000	10000	10000	10000	10000	10000	10000	1	0	NA	0	0	0	0	0	3	4	3
54	Dihydrofolic acid	15514	15514	15514	15514	15514	15514	15514	15514	1	0	NA	0	0	0	0	0	3	4	3
9	Dihydroxyacetone phosphate	10000	10000	10000	10000	10000	10000	10000	10000	1	0	NA	0	0	0	0	0	3	4	3
34	dTDP	10000	10000	10000	10000	10000	10000	10000	10000	1	0	NA	0	0	0	0	0	3	4	3
										#DIV/0!	#DIV/0!		#DIV/0!	#DIV/0!	#DIV/0!		#DIV/0!
61	FAD	10000	10000	10000	10000	10000	10000	10000	10000	1	0	NA	0	0	0	0	0	3	4	3
53	Folic acid	10000	10000	10000	10000	10000	10000	10000	10000	1	0	NA	0	0	0	0	0	3	4	3
116	Fructose 1,6-bisphosphate	10000	10000	10000	10000	10000	10000	10000	10000	1	0	NA	0	0	0	0	0	3	4	3
13	Fructose 6-phosphate	10000	10000	10000	10000	10000	10000	10000	10000	1	0	NA	0	0	0	0	0	3	4	3
78	Fumaric acid	65063.8	65063.8	65063.8	65063.8	65063.8	65063.8	65063.8	65063.8	1	0	NA	0	0	0	0	0	3	4	3
147	Gammabutyric acid	6495572	5524133	5322897	5798066	4973836	5690582	5.78087e+06	5.48749e+06	0.949251	-0.0751383	0.545723	627077	448076	0.128882	0.064441	0.11309	3	4	3
148	GAmmabutyric acid C14	1727379	2105276	1811849	2022751	1665122	1778796	1.8815e+06	1822223	0.968494	-0.0461848	0.722769	198343	182727	0.140909	0.0704547	0.121187	3	4	3
14	Glucose 6-phosphate	10000	10000	10000	10000	10000	10000	10000	10000	1	0	NA	0	0	0	0	0	3	4	3
37	Glutathione	10000	10000	10000	10000	10000	10000	10000	10000	1	0	NA	0	0	0	0	0	3	4	3
75	Glycerol 3-phosphate	10000	10000	10000	10000	10000	10000	10000	10000	1	0	NA	0	0	0	0	0	3	4	3
62	Glycine	691492	691492	691492	691492	691492	691492	691492	691492	1	0	NA	0	0	0	0	0	3	4	3
69	Guanidoacetic acid	27895	27895	27895	27895	27895	27895	27895	27895	1	0	NA	0	0	0	0	0	3	4	3
103	Guanine	44390.8	44390.8	44390.8	44390.8	44390.8	44390.8	44390.8	44390.8	1	0	1	8.91119e-12	8.91119e-12	2.83895e-16	1.41948e-16	2.36468e-16	3	4	3
28	Guanosine	14062.6	14062.6	14062.6	14062.6	14062.6	14062.6	14062.6	14062.6	1	0	NA	0	0	0	0	0	3	4	3
33	Guanosine diphosphate	10000	10000	10000	10000	10000	10000	10000	10000	1	0	NA	0	0	0	0	0	3	4	3
31	Guanosine monophosphate	10000	10000	10000	10000	10000	10000	10000	10000	1	0	NA	0	0	0	0	0	3	4	3
36	Guanosine triphosphate	10000	10000	10000	10000	10000	10000	10000	10000	1	0	NA	0	0	0	0	0	3	4	3
89	Homocysteine	10000	10000	10000	10000	10000	10000	10000	10000	1	0	NA	0	0	0	0	0	3	4	3
63	Hypotaurine	10000	10000	10000	10000	10000	10000	10000	10000	1	0	NA	0	0	0	0	0	3	4	3
99	Hypoxanthine	529619	750401	469705	505684	620840	505111	583242	543878	0.932509	-0.10081	0.695769	147831	66651.4	0.262535	0.131268	0.234503	3	4	3
21	Inosine	29336	37938	27641	33298	32853	28212	31638.3	31454.3	0.994184	-0.00841482	0.961457	5521.11	2816.74	0.195002	0.0975009	0.163375	3	4	3
25	Inosinic acid	10000	10000	10000	10000	10000	10000	10000	10000	1	0	NA	0	0	0	0	0	3	4	3
144	L-Acetylcarnitine	82462	82462	82462	82462	82462	82462	82462	82462	1	0	NA	0	0	0	0	0	3	4	3
1	L-Alanine	623190	623190	623190	623190	623190	623190	623190	623190	1	0	NA	0	0	0	0	0	3	4	3
19	L-Arginine	116761	116761	116761	116761	116761	116761	116761	116761	1	0	NA	0	0	0	0	0	3	4	3
86	L-Asparagine	37994.2	37994.2	37994.2	37994.2	37994.2	37994.2	37994.2	37994.2	1	0	NA	0	0	0	0	0	3	4	3
85	L-Aspartic acid	20609.2	20609.2	20609.2	20609.2	20609.2	20609.2	20609.2	20609.2	1	0	NA	0	0	0	0	0	3	4	3
129	L-Carnitine	82653.4	82653.4	82653.4	82653.4	82653.4	82653.4	82653.4	82653.4	1	0	NA	0	0	0	0	0	3	4	3
128	L-Cystathionine	11128	11128	11128	11128	11128	11128	11128	11128	1	0	NA	0	0	0	0	0	3	4	3
70	L-Cysteine	10000	10000	10000	10000	10000	10000	10000	10000	1	0	NA	0	0	0	0	0	3	4	3
112	L-Cystine	10000	10000	10000	10000	10000	10000	10000	10000	1	0	NA	0	0	0	0	0	3	4	3
16	L-Glutamic acid	4628859	3983050	3516668	987925	864756	941581	4042859	931421	0.230387	-2.11787	0.000660741	558502	62209.9	0.0353515	0.0176757	0.12781	3	4	3
91	L-Glutamine	296808	226963	211679	212556	201732	133940	245150	182743	0.745432	-0.423851	0.157507	45385.2	42609.4	0.221934	0.110967	0.247988	3	4	3
123	L-Histidine	143026	143026	143026	143026	143026	143026	143026	143026	1	0	NA	0	0	0	0	0	3	4	3
7	L-Isoleucine	299584	299584	299584	299584	299584	299584	299584	299584	1	0	NA	0	0	0	0	0	3	4	3
20	L-Kynurenine	15599.8	15599.8	15599.8	15599.8	15599.8	15599.8	15599.8	15599.8	1	0	1	2.2278e-12	2.2278e-12	2.01963e-16	1.00981e-16	1.68223e-16	3	4	3
68	L-Lactic acid	1.96933e+06	1.96933e+06	1.96933e+06	1.96933e+06	1.96933e+06	1.96933e+06	1.96933e+06	1.96933e+06	1	0	NA	2.85158e-10	2.85158e-10	2.04778e-16	1.02389e-16	1.70568e-16	3	4	3
8	L-Leucine	334926	334926	334926	334926	334926	334926	334926	334926	1	0	NA	0	0	0	0	0	3	4	3
18	L-Lysine	35869	35869	35869	35869	35869	35869	35869	35869	1	0	NA	0	0	0	0	0	3	4	3
83	L-Malic acid	111010	123152	156771	154079	123050	122185	130311	133105	1.02144	0.0306023	0.879155	23705.6	18169.5	0.232311	0.116156	0.18944	3	4	3
92	L-Methionine	21301.6	25006	21301.6	21301.6	21301.6	21301.6	22536.4	21301.6	0.945209	-0.0812953	0.373901	2138.74	0	0.0897016	0.0448508	0.0790472	3	4	3
133	L-Phenylalanine	76892.8	83130	76892.8	76892.8	76892.8	76892.8	78971.9	76892.8	0.973673	-0.0384903	0.373901	3601.05	0	0.0443987	0.0221993	0.0379814	3	4	3
108	L-Proline	1896127	1896127	1896127	1896127	2435064	1896127	1896127	2.07577e+06	1.09474	0.130593	0.373901	0	311155	0.164101	0.0820503	0.124857	3	4	3
71	L-Serine	107742	107742	107742	107742	107742	107742	107742	107742	1	0	1	1.78224e-11	1.78224e-11	2.33934e-16	1.16967e-16	1.94853e-16	3	4	3
90	L-Threonine	30701.2	30701.2	30701.2	30701.2	30701.2	30701.2	30701.2	30701.2	1	0	NA	0	0	0	0	0	3	4	3
40	L-Tryptophan	30845.8	30845.8	30845.8	30845.8	30845.8	30845.8	30845.8	30845.8	1	0	NA	0	0	0	0	0	3	4	3
134	L-Tyrosine	49894.6	49894.6	49894.6	49894.6	49894.6	49894.6	49894.6	49894.6	1	0	NA	0	0	0	0	0	3	4	3
4	L-Valine	1.07578e+06	1.07578e+06	1.07578e+06	1.07578e+06	1.07578e+06	1.07578e+06	1.07578e+06	1.07578e+06	1	0	NA	0	0	0	0	0	3	4	3
5	N-Acetyl-L-alanine	76873	76873	76873	76873	76873	76873	76873	76873	1	0	NA	0	0	0	0	0	3	4	3
126	N-Acetyl-L-methionine	10000	10000	10000	10000	10000	10000	10000	10000	1	0	NA	0	0	0	0	0	3	4	3
41	N-Acetyl-L-phenylalanine	49935.4	49935.4	49935.4	49935.4	49935.4	49935.4	49935.4	49935.4	1	0	NA	0	0	0	0	0	3	4	3
124	N-Acetylglutamic acid	17696.8	17696.8	17696.8	17696.8	17696.8	17696.8	17696.8	17696.8	1	0	NA	0	0	0	0	0	3	4	3
125	N-Acetylglutamine	39418	39418	39418	39418	39418	39418	39418	39418	1	0	NA	0	0	0	0	0	3	4	3
127	N-Acetylornithine	31761.4	31761.4	31761.4	31761.4	31761.4	31761.4	31761.4	31761.4	1	0	1	4.4556e-12	4.4556e-12	1.98391e-16	9.91953e-17	1.65248e-16	3	4	3
15	N-Acetylserine	210432	210432	210432	210432	210432	210432	210432	210432	1	0	NA	0	0	0	0	0	3	4	3
132	N6-Acetyl-L-lysine	279424	105908	91226.2	117310	145005	322594	158853	194970	1.22736	0.29556	0.70332	104676	111390	1.07042	0.535211	0.726435	3	4	3
56	NAD	10000	10000	10000	10000	10000	10000	10000	10000	1	0	NA	0	0	0	0	0	3	4	3
58	NADH	10000	10000	10000	10000	10000	10000	10000	10000	1	0	NA	0	0	0	0	0	3	4	3
57	NADP	11727.4	11727.4	11727.4	11727.4	11727.4	11727.4	11727.4	11727.4	1	0	NA	0	0	0	0	0	3	4	3
59	NADPH	10000	10000	10000	10000	10000	10000	10000	10000	1	0	NA	0	0	0	0	0	3	4	3
118	Niacinamide	1990186	1990186	1990186	1990186	1990186	1990186	1990186	1990186	1	0	NA	0	0	0	0	0	3	4	3
117	Nicotinic acid	27503.8	27503.8	27503.8	27503.8	27503.8	27503.8	27503.8	27503.8	1	0	NA	0	0	0	0	0	3	4	3
65	O-Phosphoethanolamine	10000	10000	10000	10000	10000	10000	10000	10000	1	0	NA	0	0	0	0	0	3	4	3
93	Ornithine	44031.4	44031.4	44031.4	44031.4	44031.4	44031.4	44031.4	44031.4	1	0	NA	0	0	0	0	0	3	4	3
98	Orotic acid	18417.4	18417.4	18417.4	18417.4	18417.4	18417.4	18417.4	18417.4	1	0	NA	0	0	0	0	0	3	4	3
24	Orotidylic acid	10000	10000	10000	10000	10000	10000	10000	10000	1	0	NA	0	0	0	0	0	3	4	3
55	Oxidized glutathione	11012.8	11012.8	11012.8	11012.8	11012.8	11012.8	11012.8	11012.8	1	0	1	2.2278e-12	2.2278e-12	2.86084e-16	1.43042e-16	2.38291e-16	3	4	3
121	Oxoadipic acid	97103.2	97103.2	97103.2	97103.2	97103.2	97103.2	97103.2	97103.2	1	0	NA	0	0	0	0	0	3	4	3
105	Oxoglutaric acid	24822.4	24822.4	24822.4	24822.4	24822.4	24822.4	24822.4	24822.4	1	0	1	4.4556e-12	4.4556e-12	2.5385e-16	1.26925e-16	2.11442e-16	3	4	3
51	Palmitic acid	6.32947e+07	6.32947e+07	6.32947e+07	6.32947e+07	6.32947e+07	6.32947e+07	6.32947e+07	6.32947e+07	1	0	NA	0	0	0	0	0	3	4	3
145	Pantothenic acid	78752.2	78752.2	78752.2	78752.2	78752.2	78752.2	78752.2	78752.2	1	0	NA	0	0	0	0	0	3	4	3
119	Phenol	15998.2	15998.2	15998.2	15998.2	15998.2	15998.2	15998.2	15998.2	1	0	1	2.2278e-12	2.2278e-12	1.96934e-16	9.84668e-17	1.64034e-16	3	4	3
76	Phosphocreatine	10000	10000	10000	10000	10000	10000	10000	10000	1	0	NA	0	0	0	0	0	3	4	3
67	Phosphoenolpyruvic acid	11446.6	11446.6	11446.6	11446.6	11446.6	11446.6	11446.6	11446.6	1	0	NA	0	0	0	0	0	3	4	3
95	Phosphoribosyl pyrophosphate	10000	10000	10000	10000	10000	10000	10000	10000	1	0	NA	0	0	0	0	0	3	4	3
97	Phosphorylcholine	15902.8	15902.8	15902.8	15902.8	15902.8	15902.8	15902.8	15902.8	1	0	1	2.2278e-12	2.2278e-12	1.98115e-16	9.90575e-17	1.65018e-16	3	4	3
73	Phosphoserine	10000	10000	10000	10000	10000	10000	10000	10000	1	0	NA	0	0	0	0	0	3	4	3
110	Pipecolic acid	578628	578628	578628	578628	578628	578628	578628	578628	1	0	NA	0	0	0	0	0	3	4	3
39	Propionylcarnitine	157611	157611	157611	157611	157611	157611	157611	157611	1	0	NA	0	0	0	0	0	3	4	3
66	Pyruvic acid	791678	791678	791678	791678	791678	791678	791678	791678	1	0	NA	0	0	0	0	0	3	4	3
11	Ribose 1-phosphate	10000	10000	10000	10000	10000	10000	10000	10000	1	0	NA	0	0	0	0	0	3	4	3
47	S-Adenosylhomocysteine	10000	10000	10000	10000	10000	10000	10000	10000	1	0	NA	0	0	0	0	0	3	4	3
48	S-Adenosylmethionine	10000	10000	10000	10000	10000	10000	10000	10000	1	0	NA	0	0	0	0	0	3	4	3
43	Saccharopine	10000	10000	10000	10000	10000	10000	10000	10000	1	0	NA	0	0	0	0	0	3	4	3
2	Sarcosine	594147	594147	594147	594147	594147	594147	594147	594147	1	0	NA	0	0	0	0	0	3	4	3
										#DIV/0!	#DIV/0!		#DIV/0!	#DIV/0!	#DIV/0!		#DIV/0!
82	Succinic acid	160706	160706	160706	160706	160706	160706	160706	160706	1	0	NA	0	0	0	0	0	3	4	3
64	Taurine	13752.4	13752.4	13752.4	13752.4	13752.4	13752.4	13752.4	13752.4	1	0	NA	0	0	0	0	0	3	4	3
29	Thymidine	12680.8	12680.8	12680.8	12680.8	12680.8	12680.8	12680.8	12680.8	1	0	1	2.2278e-12	2.2278e-12	2.48453e-16	1.24226e-16	2.06946e-16	3	4	3
77	Uracil	155259	155259	155259	155259	155259	155259	155259	155259	1	0	NA	0	0	0	0	0	3	4	3
87	Ureidopropionic acid	13034.8	13034.8	13034.8	13034.8	13034.8	13034.8	13034.8	13034.8	1	0	1	2.2278e-12	2.2278e-12	2.41705e-16	1.20853e-16	2.01326e-16	3	4	3
106	Ureidosuccinic acid	10000	10000	10000	10000	10000	10000	10000	10000	1	0	NA	0	0	0	0	0	3	4	3
101	Uric acid	10000	10000	10000	10000	10000	10000	10000	10000	1	0	NA	0	0	0	0	0	3	4	3
135	Uridine	11879.2	11879.2	11879.2	11879.2	11879.2	11879.2	11879.2	11879.2	1	0	1	2.2278e-12	2.2278e-12	2.65218e-16	1.32609e-16	2.20911e-16	3	4	3
138	Uridine 5'-diphosphate	10000	10000	10000	10000	10000	10000	10000	10000	1	0	NA	0	0	0	0	0	3	4	3
136	Uridine 5'-monophosphate	10000	10000	10000	10000	10000	10000	10000	10000	1	0	NA	0	0	0	0	0	3	4	3
50	Uridine diphosphate glucose	10000	10000	10000	10000	10000	10000	10000	10000	1	0	NA	0	0	0	0	0	3	4	3
52	Uridine diphosphate-N-acetylglucosamine	10000	10000	10000	10000	10000	10000	10000	10000	1	0	NA	0	0	0	0	0	3	4	3
141	Uridine triphosphate	10000	10000	10000	10000	10000	10000	10000	10000	1	0	NA	0	0	0	0	0	3	4	3
45	Valerylcarnitine	66465.4	66465.4	66465.4	66465.4	66465.4	66465.4	66465.4	66465.4	1	0	NA	0	0	0	0	0	3	4	3
100	Xanthine	27893.8	27893.8	27893.8	27893.8	27893.8	27893.8	27893.8	27893.8	1	0	NA	0	0	0	0	0	3	4	3
22	Xanthosine	11354.2	11354.2	11354.2	11354.2	11354.2	11354.2	11354.2	11354.2	1	0	1	2.2278e-12	2.2278e-12	2.77482e-16	1.38741e-16	2.31126e-16	3	4	3
26	Xanthylic acid	10000	10000	10000	10000	10000	10000	10000	10000	1	0	NA	0	0	0	0	0	3	4	3
										#DIV/0!	#DIV/0!		#DIV/0!		#DIV/0!		#DIV/0!	0	0	0
										#DIV/0!	#DIV/0!		#DIV/0!		#DIV/0!		#DIV/0!	0	0	0
										#DIV/0!	#DIV/0!		#DIV/0!		#DIV/0!		#DIV/0!	0	0	0
										#DIV/0!	#DIV/0!		#DIV/0!		#DIV/0!		#DIV/0!	0	0	0
										#DIV/0!	#DIV/0!		#DIV/0!		#DIV/0!		#DIV/0!	0	0	0
										#DIV/0!	#DIV/0!		#DIV/0!		#DIV/0!		#DIV/0!	0	0	0
										#DIV/0!	#DIV/0!		#DIV/0!		#DIV/0!		#DIV/0!	0	0	0
										#DIV/0!	#DIV/0!		#DIV/0!		#DIV/0!		#DIV/0!	0	0	0
										#DIV/0!	#DIV/0!		#DIV/0!		#DIV/0!		#DIV/0!	0	0	0
										#DIV/0!	#DIV/0!		#DIV/0!		#DIV/0!		#DIV/0!	0	0	0
										#DIV/0!	#DIV/0!		#DIV/0!		#DIV/0!		#DIV/0!	0	0	0
										#DIV/0!	#DIV/0!		#DIV/0!		#DIV/0!		#DIV/0!	0	0	0
										#DIV/0!	#DIV/0!		#DIV/0!		#DIV/0!		#DIV/0!	0	0	0
										#DIV/0!	#DIV/0!		#DIV/0!		#DIV/0!		#DIV/0!	0	0	0
										#DIV/0!	#DIV/0!		#DIV/0!		#DIV/0!		#DIV/0!	0	0	0
										#DIV/0!	#DIV/0!		#DIV/0!		#DIV/0!		#DIV/0!	0	0	0
										#DIV/0!	#DIV/0!		#DIV/0!		#DIV/0!		#DIV/0!	0	0	0
										#DIV/0!	#DIV/0!		#DIV/0!		#DIV/0!		#DIV/0!	0	0	0
										#DIV/0!	#DIV/0!		#DIV/0!		#DIV/0!		#DIV/0!	0	0	0
										#DIV/0!	#DIV/0!		#DIV/0!		#DIV/0!		#DIV/0!	0	0	0
										#DIV/0!	#DIV/0!		#DIV/0!		#DIV/0!		#DIV/0!	0	0	0
										#DIV/0!	#DIV/0!		#DIV/0!		#DIV/0!		#DIV/0!	0	0	0
										#DIV/0!	#DIV/0!		#DIV/0!		#DIV/0!		#DIV/0!	0	0	0
										#DIV/0!	#DIV/0!		#DIV/0!		#DIV/0!		#DIV/0!	0	0	0
										#DIV/0!	#DIV/0!		#DIV/0!		#DIV/0!		#DIV/0!	0	0	0
										#DIV/0!	#DIV/0!		#DIV/0!		#DIV/0!		#DIV/0!	0	0	0
										#DIV/0!	#DIV/0!		#DIV/0!		#DIV/0!		#DIV/0!	0	0	0
										#DIV/0!	#DIV/0!		#DIV/0!		#DIV/0!		#DIV/0!	0	0	0
										#DIV/0!	#DIV/0!		#DIV/0!		#DIV/0!		#DIV/0!	0	0	0
										#DIV/0!	#DIV/0!		#DIV/0!		#DIV/0!		#DIV/0!	0	0	0
										#DIV/0!	#DIV/0!		#DIV/0!		#DIV/0!		#DIV/0!	0	0	0
										#DIV/0!	#DIV/0!		#DIV/0!		#DIV/0!		#DIV/0!	0	0	0
										#DIV/0!	#DIV/0!		#DIV/0!		#DIV/0!		#DIV/0!	0	0	0
										#DIV/0!	#DIV/0!		#DIV/0!		#DIV/0!		#DIV/0!	0	0	0
										#DIV/0!	#DIV/0!		#DIV/0!		#DIV/0!		#DIV/0!	0	0	0
										#DIV/0!	#DIV/0!		#DIV/0!		#DIV/0!		#DIV/0!	0	0	0
										#DIV/0!	#DIV/0!		#DIV/0!		#DIV/0!		#DIV/0!	0	0	0
										#DIV/0!	#DIV/0!		#DIV/0!		#DIV/0!		#DIV/0!	0	0	0
										#DIV/0!	#DIV/0!		#DIV/0!				#DIV/0!	0	0	0
										#DIV/0!	#DIV/0!		#DIV/0!				#DIV/0!	0	0	0
										#DIV/0!	#DIV/0!		#DIV/0!				#DIV/0!	0	0	0
										#DIV/0!	#DIV/0!		#DIV/0!				#DIV/0!	0	0	0
										#DIV/0!			#DIV/0!				#DIV/0!	0	0	0
										#DIV/0!			#DIV/0!				#DIV/0!	0	0	0
										#DIV/0!			#DIV/0!				#DIV/0!	0	0	0
										#DIV/0!			#DIV/0!				#DIV/0!	0	0	0
										#DIV/0!			#DIV/0!				#DIV/0!	0	0	0
										#DIV/0!			#DIV/0!				#DIV/0!	0	0	0
										#DIV/0!			#DIV/0!				#DIV/0!	0	0	0
										#DIV/0!			#DIV/0!				#DIV/0!	0	0	0
										#DIV/0!			#DIV/0!				#DIV/0!	0	0	0
										#DIV/0!			#DIV/0!				#DIV/0!	0	0	0
										#DIV/0!			#DIV/0!				#DIV/0!	0	0	0
										#DIV/0!			#DIV/0!				#DIV/0!	0	0	0
										#DIV/0!			#DIV/0!				#DIV/0!	0	0	0
										#DIV/0!			#DIV/0!				#DIV/0!	0	0	0
										#DIV/0!			#DIV/0!				#DIV/0!	0	0	0
										#DIV/0!			#DIV/0!				#DIV/0!	0	0	0
										#DIV/0!			#DIV/0!				#DIV/0!	0	0	0
										#DIV/0!			#DIV/0!				#DIV/0!	0	0	0
										#DIV/0!			#DIV/0!				#DIV/0!	0	0	0
										#DIV/0!			#DIV/0!				#DIV/0!	0	0	0
										#DIV/0!			#DIV/0!				#DIV/0!	0	0	0
										#DIV/0!			#DIV/0!				#DIV/0!	0	0	0
										#DIV/0!			#DIV/0!				#DIV/0!	0	0	0
										#DIV/0!			#DIV/0!				#DIV/0!	0	0	0
										#DIV/0!			#DIV/0!					0	0	0
										#DIV/0!			#DIV/0!					0	0	0
										#DIV/0!			#DIV/0!					0	0	0
										#DIV/0!			#DIV/0!					0	0	0
										#DIV/0!			#DIV/0!					0	0	0
										#DIV/0!			#DIV/0!					0	0	0
										#DIV/0!			#DIV/0!					0	0	0
										#DIV/0!			#DIV/0!					0	0	0
										#DIV/0!			#DIV/0!					0	0	0
										#DIV/0!			#DIV/0!					0	0	0
										#DIV/0!			#DIV/0!					0	0	0
										#DIV/0!			#DIV/0!					0	0	0
										#DIV/0!			#DIV/0!					0	0	0
										#DIV/0!								0	0	0
										#DIV/0!								0	0	0
										#DIV/0!								0	0	0
										#DIV/0!								0	0	0
										#DIV/0!								0	0	0
										#DIV/0!								0	0	0
										#DIV/0!								0	0	0
										#DIV/0!								0	0	0
										#DIV/0!								0	0	0
										#DIV/0!								0	0	0
										#DIV/0!								0	0	0
										#DIV/0!								0	0	0
										#DIV/0!								0	0	0
										#DIV/0!								0	0	0
										#DIV/0!								0	0	0
										#DIV/0!								0	0	0
										#DIV/0!								0	0	0
										#DIV/0!								0	0	0
										#DIV/0!								0	0	0
										#DIV/0!								0	0	0
										#DIV/0!								0	0	0
										#DIV/0!								0	0	0
										#DIV/0!								0	0	0
										#DIV/0!								0	0	0
										#DIV/0!								0	0	0
										#DIV/0!								0	0	0
										#DIV/0!								0	0	0
										#DIV/0!								0	0	0
										#DIV/0!								0	0	0
										#DIV/0!								0	0	0
										#DIV/0!								0	0	0
