# Supplementary material for: Rapid purification and metabolomic profiling of synaptic vesicles from mammalian brain
Source: eLife. 2020 Oct 12;9:e59699. doi: 10.7554/eLife.59699 (PMC7575323; doi:10.7554/eLife.59699)
Supplement: Supplementary file 4. [file elife-59699-supp4.xlsx]

## Sheet: raw global MS data
Original Order	Manual Annotation	Metabolite	Formula	Polarity (z)	mass/charge	ppm	Retention time	Retention time range	Detection	uninfected DMSO treated, sample 1	infected, Lev treated sample 1	infected, Lev treated sample 2	infected, Lev treated sample 3	uninfected DMSO treated, sample 2	infected, BafA treated, sample 1	infected, BafA treated, sample 2	infected, BafA treated, sample 3	uninfected DMSO treated, sample 3	infected, DMSO treated, sample 1	infected, DMSO treated, sample 2	infected, DMSO treated, sample 3	infected BafA/infected DMSO ttest pvalue	infected BafA/infected DMSO Log2 fold change	infected Lev/infected DMSO ttest pvalue	infected Lev/infected DMSO log2 fold change	infected DMSO/uninfected DMSO, ttest pvalue	infected DMSO/uninfected DMSO, log2 fold cahnge	-log10 pvalue infected DMSO/uninfected DMSO	-log10pvalue infected BafA/infected DMSO	-log10 pvalue infected Lev/infected DMSO
1120		Feature_-_201.8009_10.6	201.801	-	201.801	0	10.64	0.17	1	-	-	-	-	-	1030584	-	-	-	-	-	-	0.373901	5.13009	NA	0	NA	0
6081		Feature_+_113.1074_9.3	113.107	+	113.107	0	9.55	0.05	1	-	-	-	-	-	-	5962044	-	-	-	-	-	0.373901	1.64889	NA	0	NA	0
2119	Glutamate negative mode	Feature_-_146.0447_11.5	146.045	-	146.045	0	11.53	0.16	11	23757	1288395	1668965	1596844	49945	40469	52572	50035	-	1767293	1449567	1109895	0.0018288	-4.91843	0.75078	0.0739135	0.00175727	5.51976	2.75516	2.73783	0.124487
6083		Feature_+_113.1074_9.8	113.107	+	113.107	0	9.6	0.08	1	-	-	-	-	-	-	5539346	-	-	-	-	-	0.373901	1.46881	NA	0	NA	0
5876		Feature_+_106.0864_12.0	106.086	+	106.086	0	11.76	0.04	1	-	-	-	-	-	-	-	4213014	-	-	-	-	0.373901	1.26911	NA	0	NA	0
9651		Feature_+_228.1952_3.1	228.195	+	228.195	0.4	2.88	0.03	1	-	-	-	-	-	-	-	3445092	-	-	-	-	0.373901	0.0144755	NA	0	NA	0
5909		Feature_+_107.0897_11.7	107.09	+	107.09	0	11.47	0.24	1	-	-	-	-	-	-	-	796620	-	-	-	-	0.373901	3.08299	NA	0	NA	0
5908		Feature_+_107.0897_11.4	107.09	+	107.09	0	11.45	0.28	1	-	-	-	-	-	-	-	818905	-	-	-	-	0.373901	3.12309	NA	0	NA	0
7617		Feature_+_148.0965_4.3	148.096	+	148.096	0	4.58	0.03	1	-	-	-	-	-	-	-	1820942	-	-	-	-	0.373901	0.244506	NA	0	NA	0
9572		Feature_+_224.0992_2.7	224.099	+	224.099	0	2.74	0.07	1	-	-	-	-	-	-	1360377	-	-	-	-	-	0.373901	0.0307052	NA	0	NA	0
6755		Feature_+_134.0809_5.0	134.081	+	134.081	0	4.98	0.1	1	-	-	-	-	-	-	-	1258211	-	-	-	-	0.373901	0.166083	NA	0	NA	0
6756		Feature_+_134.0810_4.7	134.081	+	134.081	-0.7	4.89	0.07	1	-	-	-	-	-	-	-	1242639	-	-	-	-	0.373901	0.158819	NA	0	NA	0
5067		Feature_+_88.0761_11.8	88.0761	+	88.0761	0	11.51	0.21	1	-	-	-	-	-	-	-	803341	-	-	-	-	0.373901	0.195862	NA	0	NA	0
1076		Feature_-_209.3079_22.9	209.308	-	209.308	0	22.89	0	1	-	-	-	-	-	-	-	-	156689	-	-	-	NA	0	NA	0	0.373901	-2.55818
1084		Feature_-_208.9906_22.8	208.991	-	208.991	0	22.81	0	1	-	-	-	-	165279	-	-	-	-	-	-	-	NA	0	NA	0	0.373901	-2.62666
5066		Feature_+_88.0761_11.5	88.0761	+	88.0761	0	11.49	0.46	1	-	-	-	-	-	-	-	805014	-	-	-	-	0.373901	0.197083	NA	0	NA	0
5065		Feature_+_88.0761_11.2	88.0761	+	88.0761	0	11.45	0.21	1	-	-	-	-	-	-	-	799795	-	-	-	-	0.373901	0.212722	NA	0	NA	0
6084		Feature_+_113.1074_10.1	113.107	+	113.107	0	9.87	0.12	1	-	-	-	-	-	-	1130090	-	-	-	-	-	0.373901	0.898091	NA	0	NA	0
5712		Feature_+_101.0712_0.9	101.071	+	101.071	0	0.9	0.35	1	-	-	-	-	-	-	945862	-	-	-	-	-	0.373901	0.835963	NA	0	NA	0
7219		Feature_+_140.0815_0.9	140.082	+	140.082	0	0.9	0.42	1	-	-	-	-	-	-	998678	-	-	-	-	-	0.373901	0.60807	NA	0	NA	0
3010		Feature_-_106.0398_12.3	106.04	-	106.04	0	12.34	0.48	1	-	-	-	-	-	317131	-	-	-	-	-	-	0.373901	0.343217	NA	0	NA	0
2965		Feature_-_106.0399_11.9	106.04	-	106.04	0	11.87	0.42	1	-	-	-	-	-	246094	-	-	-	-	-	-	0.373901	0.218202	NA	0	NA	0
1149		Feature_-_198.8070_10.6	198.807	-	198.807	0	10.64	0	1	-	-	-	-	-	152726	-	-	-	-	-	-	0.373901	2.52545	NA	0	NA	0
1156		Feature_-_197.7567_10.6	197.757	-	197.757	0	10.64	0	1	-	-	-	-	-	154247	-	-	-	-	-	-	0.373901	2.5381	NA	0	NA	0
1177		Feature_-_193.8150_10.6	193.815	-	193.815	0	10.64	0.13	1	-	-	-	-	-	213659	-	-	-	-	-	-	0.373901	2.96137	NA	0	NA	0
1344		Feature_-_177.8441_10.6	177.844	-	177.844	0	10.64	0.25	1	-	-	-	-	-	162940	-	-	-	-	-	-	0.373901	2.60834	NA	0	NA	0
6745		Feature_+_132.0766_10.6	132.077	+	132.077	0	10.55	0.08	1	-	-	-	-	-	-	-	235677	-	-	-	-	0.373901	0.231795	NA	0	NA	0
6180		Feature_+_114.1106_9.6	114.111	+	114.111	0	9.55	0.19	1	-	-	-	-	-	-	350676	-	-	-	-	-	0.373901	2.0743	NA	0	NA	0
5923		Feature_+_110.0714_3.0	110.071	+	110.071	0	2.97	0.48	1	-	-	-	-	-	-	356783	-	-	-	-	-	0.373901	1.13737	NA	0	NA	0
4987		Feature_+_84.0560_3.0	84.056	+	84.056	0	2.97	0.47	1	-	-	-	-	-	-	409034	-	-	-	-	-	0.373901	1.31058	NA	0	NA	0
5206		Feature_+_89.0713_3.0	89.0713	+	89.0713	0	2.97	0.27	1	-	-	-	-	-	-	347687	-	-	-	-	-	0.373901	0.489601	NA	0	NA	0
5757		Feature_+_103.0868_3.0	103.087	+	103.087	0	2.97	0.42	1	-	-	-	-	-	-	302929	-	-	-	-	-	0.373901	0.935625	NA	0	NA	0
9663		Feature_+_232.1900_2.9	232.19	+	232.19	0	2.93	0.2	1	-	-	-	-	-	-	-	388017	-	-	-	-	0.373901	1.41376	NA	0	NA	0
9963		Feature_+_279.1582_2.3	279.158	+	279.158	1.4	2.54	0.26	1	-	-	-	-	-	328194	-	-	-	-	-	-	0.373901	0.00153046	NA	0	NA	0
5005		Feature_+_87.0557_0.9	87.0557	+	87.0557	0	0.9	0.42	1	-	-	-	-	-	-	392656	-	-	-	-	-	0.373901	0.662896	NA	0	NA	0
5919		Feature_+_110.0714_0.9	110.071	+	110.071	0	0.9	0.42	1	-	-	-	-	-	-	388299	-	-	-	-	-	0.373901	0.691877	NA	0	NA	0
6194		Feature_+_117.0659_0.9	117.066	+	117.066	0	0.9	0.48	1	-	-	-	-	-	-	332429	-	-	-	-	-	0.373901	0.996529	NA	0	NA	0
4991		Feature_+_84.0561_0.9	84.0561	+	84.0561	0	0.9	0.48	1	-	-	-	-	-	-	328246	-	-	-	-	-	0.373901	0.563357	NA	0	NA	0
5754		Feature_+_103.0868_0.9	103.087	+	103.087	0	0.9	0.4	1	-	-	-	-	-	-	295487	-	-	-	-	-	0.373901	0.890112	NA	0	NA	0
6075		Feature_+_113.0711_0.9	113.071	+	113.071	0	0.9	0.48	1	-	-	-	-	-	-	242201	-	-	-	-	-	0.373901	0.237003	NA	0	NA	0
7013		Feature_+_137.0819_0.9	137.082	+	137.082	0	0.9	0.39	1	-	-	-	-	-	-	329374	-	-	-	-	-	0.373901	0.613905	NA	0	NA	0
774		Feature_-_257.8180_10.6	257.818	-	257.818	0	10.64	0.21	1	-	-	-	-	-	109278	-	-	-	-	-	-	0.373901	2.10744	NA	0	NA	0
1057		Feature_-_210.3735_23.0	210.374	-	210.374	0	22.98	0.25	1	104414	-	-	-	-	-	-	-	-	-	-	-	NA	0	NA	0	0.373901	-1.99154
9211		Feature_+_210.0657_22.9	210.066	+	210.066	0	22.92	0	1	-	-	-	-	104009	-	-	-	-	-	-	-	NA	0	NA	0	0.373901	-2.04741
1166		Feature_-_195.7606_10.6	195.761	-	195.761	0	10.64	0.21	1	-	-	-	-	-	128253	-	-	-	-	-	-	0.373901	2.24589	NA	0	NA	0
1340		Feature_-_179.8402_10.6	179.84	-	179.84	0	10.64	0.24	1	-	-	-	-	-	118314	-	-	-	-	-	-	0.373901	2.20491	NA	0	NA	0
5872		Feature_+_106.0864_5.0	106.086	+	106.086	0	4.98	0.21	1	-	-	-	-	-	-	-	138183	-	-	-	-	0.373901	0.0928776	NA	0	NA	0
8769		Feature_+_182.1385_3.3	182.138	+	182.138	0	3.32	0.16	1	-	-	-	-	-	-	-	131056	-	-	-	-	0.373901	0.00547699	NA	0	NA	0
4664		Feature_+_75.0558_3.2	75.0558	+	75.0558	0	3.22	0.39	1	-	-	-	-	-	-	-	162546	-	-	-	-	0.373901	0.870117	NA	0	NA	0
4663		Feature_+_75.0558_3.0	75.0558	+	75.0558	0	2.97	0.43	1	-	-	-	-	-	-	210588	-	-	-	-	-	0.373901	0.926274	NA	0	NA	0
5506		Feature_+_97.0763_3.0	97.0763	+	97.0763	0	2.97	0.38	1	-	-	-	-	-	-	152860	-	-	-	-	-	0.373901	0.369221	NA	0	NA	0
6073		Feature_+_113.0710_3.0	113.071	+	113.071	0	2.97	0.49	1	-	-	-	-	-	-	180824	-	-	-	-	-	0.373901	0.268417	NA	0	NA	0
7881		Feature_+_156.0767_3.0	156.077	+	156.077	0	2.97	0.36	1	-	-	-	-	-	-	161271	-	-	-	-	-	0.373901	0.651568	NA	0	NA	0
5617		Feature_+_99.0555_3.0	99.0555	+	99.0555	0	2.97	0.36	1	-	-	-	-	-	-	106790	-	-	-	-	-	0.373901	0.141397	NA	0	NA	0
6343		Feature_+_122.0713_3.0	122.071	+	122.071	0	2.97	0.43	1	-	-	-	-	-	-	104969	-	-	-	-	-	0.373901	0.414999	NA	0	NA	0
7017		Feature_+_137.0820_3.0	137.082	+	137.082	0	2.97	0.46	1	-	-	-	-	-	-	238256	-	-	-	-	-	0.373901	0.973568	NA	0	NA	0
7748		Feature_+_152.0816_3.0	152.082	+	152.082	0	2.97	0.46	1	-	-	-	-	-	-	100144	-	-	-	-	-	0.373901	0.509465	NA	0	NA	0
5505		Feature_+_97.0763_2.4	97.0763	+	97.0763	0	2.37	0.43	1	-	-	-	-	-	-	-	171668	-	-	-	-	0.373901	0.193778	NA	0	NA	0
6088		Feature_+_114.0664_2.4	114.066	+	114.066	0	2.37	0.44	1	-	-	-	-	-	-	-	135888	-	-	-	-	0.373901	0.338784	NA	0	NA	0
6500		Feature_+_126.0662_2.4	126.066	+	126.066	0	2.37	0.37	1	-	-	-	-	-	-	-	123335	-	-	-	-	0.373901	0.276628	NA	0	NA	0
6078		Feature_+_113.0711_2.4	113.071	+	113.071	0	2.37	0.42	1	-	-	-	-	-	-	-	176702	-	-	-	-	0.373901	0.0773995	NA	0	NA	0
6345		Feature_+_122.0714_2.4	122.071	+	122.071	0	2.37	0.45	1	-	-	-	-	-	-	-	212591	-	-	-	-	0.373901	0.547057	NA	0	NA	0
7243		Feature_+_141.0769_2.4	141.077	+	141.077	0	2.37	0.4	1	-	-	-	-	-	-	-	130759	-	-	-	-	0.373901	0.335309	NA	0	NA	0
7879		Feature_+_156.0766_2.4	156.077	+	156.077	0	2.37	0.4	1	-	-	-	-	-	-	-	124870	-	-	-	-	0.373901	0.194569	NA	0	NA	0
5619		Feature_+_99.0556_2.4	99.0556	+	99.0556	0	2.37	0.45	1	-	-	-	-	-	-	-	107607	-	-	-	-	0.373901	0.0407064	NA	0	NA	0
5205		Feature_+_89.0713_0.9	89.0713	+	89.0713	0	0.9	0.49	1	-	-	-	-	-	-	203920	-	-	-	-	-	0.373901	0.142667	NA	0	NA	0
5734		Feature_+_102.0664_0.9	102.066	+	102.066	0	0.9	0.39	1	-	-	-	-	-	-	163542	-	-	-	-	-	0.373901	0.915316	NA	0	NA	0
6086		Feature_+_114.0663_0.9	114.066	+	114.066	0	0.9	0.39	1	-	-	-	-	-	-	168882	-	-	-	-	-	0.373901	0.6525	NA	0	NA	0
7242		Feature_+_141.0769_0.9	141.077	+	141.077	0	0.9	0.39	1	-	-	-	-	-	-	160544	-	-	-	-	-	0.373901	0.567456	NA	0	NA	0
7508		Feature_+_145.0971_0.9	145.097	+	145.097	0	0.9	0.37	1	-	-	-	-	-	-	104113	-	-	-	-	-	0.373901	0.463727	NA	0	NA	0
7853		Feature_+_154.0973_0.9	154.097	+	154.097	0	0.9	0.42	1	-	-	-	-	-	-	120688	-	-	-	-	-	0.373901	0.495413	NA	0	NA	0
4551		Feature_+_73.0766_0.9	73.0766	+	73.0766	0	0.9	0.48	1	-	-	-	-	-	-	228361	-	-	-	-	-	0.373901	0.538883	NA	0	NA	0
4661		Feature_+_75.0558_0.9	75.0558	+	75.0558	0	0.9	0.48	1	-	-	-	-	-	-	111392	-	-	-	-	-	0.373901	0.305646	NA	0	NA	0
5618		Feature_+_99.0556_0.9	99.0556	+	99.0556	0	0.9	0.44	1	-	-	-	-	-	-	127571	-	-	-	-	-	0.373901	0.184694	NA	0	NA	0
5621		Feature_+_100.0508_0.9	100.051	+	100.051	0	0.9	0.42	1	-	-	-	-	-	-	109484	-	-	-	-	-	0.373901	0.482345	NA	0	NA	0
6341		Feature_+_122.0713_0.9	122.071	+	122.071	0	0.9	0.42	1	-	-	-	-	-	-	232469	-	-	-	-	-	0.373901	0.439901	NA	0	NA	0
6499		Feature_+_126.0662_0.9	126.066	+	126.066	0	0.9	0.37	1	-	-	-	-	-	-	152727	-	-	-	-	-	0.373901	0.495009	NA	0	NA	0
6741		Feature_+_131.0815_0.9	131.082	+	131.082	0	0.9	0.38	1	-	-	-	-	-	-	100147	-	-	-	-	-	0.373901	0.584347	NA	0	NA	0
7337		Feature_+_144.0767_0.9	144.077	+	144.077	0	0.9	0.42	1	-	-	-	-	-	-	105218	-	-	-	-	-	0.373901	0.470358	NA	0	NA	0
7863		Feature_+_155.0926_0.9	155.093	+	155.093	0	0.9	0.42	1	-	-	-	-	-	-	139069	-	-	-	-	-	0.373901	0.589242	NA	0	NA	0
7878		Feature_+_156.0766_0.9	156.077	+	156.077	0	0.9	0.42	1	-	-	-	-	-	-	126458	-	-	-	-	-	0.373901	0.353265	NA	0	NA	0
8421		Feature_+_170.0923_0.9	170.092	+	170.092	0	0.9	0.47	1	-	-	-	-	-	-	108613	-	-	-	-	-	0.373901	0.456927	NA	0	NA	0
7616	Glutamate positive mode	Feature_+_148.0602_11.8	148.06	+	148.06	-0.7	11.54	0.05	12	148014	4781689	5897283	5822986	370157	248923	389110	353051	120028	6592586	5491143	4253734	0.0016426	-4.04303	0.946339	0.0144532	0.00153528	4.67803	2.81381	2.78447	0.0239534
6625		Feature_+_128.9632_22.8	128.963	+	128.963	0	22.8	0.19	2	-	-	-	-	-	-	211697	410426	-	-	-	-	0.160216	3.42999	NA	0	NA	0
7639	Isotope of Glutamate positive mode	Feature_+_149.0635_11.5	149.064	+	149.064	0	11.52	0.21	8	-	158526	267613	215399	13558	-	-	13344	-	258481	199121	152066	0.00346659	-4.00015	0.821273	0.0735109	0.00347172	3.99207	2.45946	2.4601	0.0855122
7615	Glutamate positive mode	Feature_+_148.0601_11.5	148.06	+	148.06	0	11.52	0.11	12	148014	4838214	6676603	5822986	370157	307340	395091	353051	120028	6592586	5491143	4253734	0.00166119	-3.95221	0.717765	0.0857371	0.00153528	4.67803	2.81381	2.77958	0.144018
5003	Isotope of In-source fragment of GABA, "2-Pyrolidinone"	Feature_+_87.0445_11.4	87.0445	+	87.0445	0	11.36	0.26	6	-	613653	826273	762769	-	-	-	-	-	797821	727132	561587	0.000779613	-3.73096	0.702086	0.0781572	0.000779613	3.73096	3.10812	3.10812	0.153609
8420		Feature_+_170.0421_11.5	170.042	+	170.042	0	11.54	0.25	6	-	112124	198370	138352	-	-	-	-	-	205463	161591	104117	0.00792256	-3.63405	0.85758	-0.0700302	0.00792256	3.63405	2.10113	2.10113	0.0667253
6680		Feature_+_130.0497_11.5	130.05	+	130.05	0	11.54	0.3	6	-	237829	393121	347919	-	-	-	-	-	444839	346302	222158	0.00858742	-3.59724	0.89183	-0.0498722	0.00858742	3.59724	2.06614	2.06614	0.049718
8831	CO2 Adduct of Glutamate	Feature_+_192.0240_11.6	192.024	+	192.024	0	11.58	0.36	6	-	114182	184612	173726	-	-	-	-	-	176085	141017	120839	0.0011883	-3.4733	0.693494	0.109639	0.0011883	3.4733	2.92507	2.92507	0.158957
7340		Feature_+_144.9271_22.8	144.927	+	144.927	0.7	23.08	0.25	1	-	-	-	-	-	-	-	700064	-	-	-	-	0.373901	0.0475067	NA	0	NA	0
1152		Feature_-_197.8073_20.1	197.807	-	197.807	0	20.14	0.03	1	-	-	-	-	-	314211	-	-	-	-	-	-	0.373901	3.47772	NA	0	NA	0
1155		Feature_-_197.8069_10.4	197.807	-	197.807	0	10.36	0.45	9	11868	-	10762	-	26674	10964	18934	26005	68138	536532	-	21771	0.380384	-3.34684	0.360451	-4.16561	0.426815	2.41455	0.369761	0.419778	0.443154
7736		Feature_+_150.1121_5.6	150.112	+	150.112	0	5.55	0.15	1	-	-	7487520	-	-	-	-	-	-	-	-	-	NA	0	0.373901	0.243104	NA	0
7737		Feature_+_150.1121_5.8	150.112	+	150.112	0	5.6	0.06	1	-	-	6816011	-	-	-	-	-	-	-	-	-	NA	0	0.373901	0.227644	NA	0
7735		Feature_+_150.1121_5.3	150.112	+	150.112	0	5.53	0.08	1	-	-	6638094	-	-	-	-	-	-	-	-	-	NA	0	0.373901	0.178343	NA	0
1153		Feature_-_197.8071_16.8	197.807	-	197.807	0	16.82	0.25	1	-	800273	-	-	-	-	-	-	-	-	-	-	NA	0	0.373901	4.77307	NA	0
2866		Feature_-_115.0751_3.3	115.075	-	115.075	0	3.28	0.03	2	-	-	-	4532404	-	-	-	4818045	-	-	-	-	0.373901	0.432791	0.373901	0.388839	NA	0
7202		Feature_+_139.0499_8.2	139.05	+	139.05	0	8.01	0.04	1	-	-	3030144	-	-	-	-	-	-	-	-	-	NA	0	0.373901	0.0658448	NA	0
6531		Feature_+_128.9431_22.7	128.943	+	128.943	0	22.68	0.25	1	-	-	-	-	-	-	273568	-	-	-	-	-	0.373901	2.56546	NA	0	NA	0
1162		Feature_-_195.8102_20.1	195.81	-	195.81	0	20.14	0	1	-	-	-	-	-	245499	-	-	-	-	-	-	0.373901	3.14567	NA	0	NA	0
7201		Feature_+_139.0498_8.0	139.05	+	139.05	0	7.96	0.07	1	-	-	3057347	-	-	-	-	-	-	-	-	-	NA	0	0.373901	0.0392933	NA	0
8536		Feature_+_171.1487_5.5	171.149	+	171.149	0	5.24	0.22	1	-	-	2912914	-	-	-	-	-	-	-	-	-	NA	0	0.373901	0.0240719	NA	0
8535		Feature_+_171.1487_5.2	171.149	+	171.149	0	5.17	0.32	1	-	-	2961294	-	-	-	-	-	-	-	-	-	NA	0	0.373901	0.0275952	NA	0
8534		Feature_+_171.1487_4.9	171.149	+	171.149	0	5.13	0.21	1	-	-	2603826	-	-	-	-	-	-	-	-	-	NA	0	0.373901	0.012828	NA	0
2492		Feature_-_129.0911_3.4	129.091	-	129.091	-2.3	3.19	0.02	2	-	-	-	3289898	-	-	-	3923566	-	-	-	-	0.373901	0.641003	0.373901	0.501038	NA	0
1164		Feature_-_195.8101_16.8	195.81	-	195.81	0	16.82	0.25	1	-	604520	-	-	-	-	-	-	-	-	-	-	NA	0	0.373901	4.37971	NA	0
2855		Feature_-_115.0752_3.0	115.075	-	115.075	0	3.24	0.02	1	-	-	-	2475258	-	-	-	-	-	-	-	-	NA	0	0.373901	0.105531	NA	0
2856		Feature_-_115.0752_3.5	115.075	-	115.075	0	3.29	0.03	2	-	-	-	2850016	-	-	-	2489696	-	-	-	-	0.373901	0.32862	0.373901	0.423391	NA	0
1165		Feature_-_195.8099_10.4	195.81	-	195.81	0	10.36	0.48	6	-	-	25459	14158	-	-	-	-	54195	271534	19189	16858	0.338966	-3.24111	0.368432	-2.60774	0.4186	2.01914	0.378201	0.469843	0.433643
7627		Feature_+_149.0231_7.1	149.023	+	149.023	-0.7	6.82	0.03	1	-	1920366	-	-	-	-	-	-	-	-	-	-	NA	0	0.373901	0.0366569	NA	0
5623		Feature_+_100.0759_3.7	100.076	+	100.076	0	3.72	0.1	1	-	-	-	1070747	-	-	-	-	-	-	-	-	NA	0	0.373901	0.0633178	NA	0
5875		Feature_+_106.0864_11.5	106.086	+	106.086	0	11.47	0.24	2	-	-	1283155	-	-	-	-	16987028	-	-	-	-	0.373901	2.39678	0.373901	0.0202096	NA	0
5877		Feature_+_106.0865_11.7	106.087	+	106.087	-0.9	11.51	0.2	2	-	-	1283155	-	-	-	-	16810038	-	-	-	-	0.373901	2.38359	0.373901	0.0202096	NA	0
1135		Feature_-_199.8041_16.8	199.804	-	199.804	0	16.82	0	1	-	360700	-	-	-	-	-	-	-	-	-	-	NA	0	0.373901	3.66562	NA	0
7613		Feature_+_148.0389_7.0	148.039	+	148.039	0	6.8	0.08	1	-	747549	-	-	-	-	-	-	-	-	-	-	NA	0	0.373901	0.0329595	NA	0
7612		Feature_+_148.0389_6.7	148.039	+	148.039	0	6.72	0.09	1	-	798461	-	-	-	-	-	-	-	-	-	-	NA	0	0.373901	0.0364633	NA	0
5624		Feature_+_100.0759_4.0	100.076	+	100.076	0	3.75	0.05	1	-	-	-	947810	-	-	-	-	-	-	-	-	NA	0	0.373901	0.0152392	NA	0
7892		Feature_+_157.1412_3.2	157.141	+	157.141	0	3.17	0.04	1	-	-	689011	-	-	-	-	-	-	-	-	-	NA	0	0.373901	0.0543568	NA	0
5587		Feature_+_98.0715_0.6	98.0715	+	98.0715	0	0.62	0.46	1	-	-	779010	-	-	-	-	-	-	-	-	-	NA	0	0.373901	0.169912	NA	0
2857		Feature_-_115.0752_3.8	115.075	-	115.075	0	3.58	0.19	2	-	-	-	610936	-	-	-	606706	-	-	-	-	0.373901	0.0161942	0.373901	0.0196178	NA	0
8130		Feature_+_164.1278_14.6	164.128	+	164.128	0	14.6	0.33	2	-	101983	-	414768	-	-	-	-	-	-	-	-	NA	0	0.334359	1.30245	NA	0
7912		Feature_+_158.1538_10.5	158.154	+	158.154	-1.3	10.38	0.32	1	-	-	505018	-	-	-	-	-	-	-	-	-	NA	0	0.373901	0.287378	NA	0
7910		Feature_+_158.1536_10.3	158.154	+	158.154	0	10.29	0.25	1	-	-	547504	-	-	-	-	-	-	-	-	-	NA	0	0.373901	0.49985	NA	0
7745		Feature_+_151.1154_5.6	151.115	+	151.115	0	5.55	0.13	1	-	-	400265	-	-	-	-	-	-	-	-	-	NA	0	0.373901	0.54762	NA	0
7746		Feature_+_151.1155_5.3	151.115	+	151.115	0	5.53	0.13	1	-	-	316232	-	-	-	-	-	-	-	-	-	NA	0	0.373901	0.410199	NA	0
6626		Feature_+_128.9633_23.2	128.963	+	128.963	0	23.2	0.18	2	32478	-	-	-	-	-	218676	-	-	-	-	-	0.373901	2.33669	NA	0	0.373901	-0.398234
1079		Feature_-_209.2730_22.9	209.273	-	209.273	0	22.89	0.11	2	-	-	-	-	79912	182397	-	-	-	-	-	-	0.373901	2.75415	NA	0	0.373901	-1.7357
10726		Feature_+_784.0433_23.1	784.043	+	784.043	0	23.11	0	1	-	-	-	-	-	-	-	104654	-	-	-	-	0.373901	2.05489	NA	0	NA	0
1083		Feature_-_208.9999_23.1	209	-	209	0	23.08	0.12	2	-	-	-	-	118737	70763	-	-	-	-	-	-	0.373901	1.59714	NA	0	0.373901	-2.20932
9202		Feature_+_209.2618_23.1	209.262	+	209.262	0	23.07	0.08	2	-	-	-	-	21029	109485	-	-	-	-	-	-	0.373901	2.10975	NA	0	0.373901	-0.451681
1074		Feature_-_209.3571_23.0	209.357	-	209.357	0	23	0	1	-	-	-	-	-	-	115909	-	-	-	-	-	0.373901	2.17961	NA	0	NA	0
9205		Feature_+_209.6084_23.0	209.608	+	209.608	0	22.98	0.12	2	-	-	-	-	83023	106570	-	-	-	-	-	-	0.373901	2.0769	NA	0	0.373901	-1.77993
1061		Feature_-_209.9553_22.7	209.955	-	209.955	0	22.75	0.13	1	-	-	-	-	-	-	-	127291	-	-	-	-	0.373901	2.22975	NA	0	NA	0
9204		Feature_+_209.6013_22.7	209.601	+	209.601	0	22.74	0	1	-	-	-	-	-	102258	-	-	-	-	-	-	0.373901	2.02689	NA	0	NA	0
10772		Feature_+_868.4080_22.7	868.408	+	868.408	0	22.73	0.22	1	-	-	-	-	-	-	-	147526	-	-	-	-	0.373901	2.48135	NA	0	NA	0
1068		Feature_-_209.6217_22.7	209.622	-	209.622	0	22.72	0.18	2	-	-	-	-	110062	134522	-	-	-	-	-	-	0.373901	2.36478	NA	0	0.373901	-2.11617
1065		Feature_-_209.9316_22.7	209.932	-	209.932	0	22.66	0	1	-	-	-	-	-	105211	-	-	-	-	-	-	0.373901	2.06133	NA	0	NA	0
2910		Feature_-_109.0395_22.6	109.04	-	109.04	0	22.62	0.43	1	-	-	-	-	-	-	-	131769	-	-	-	-	0.373901	0.501283	NA	0	NA	0
3011		Feature_-_106.0398_22.6	106.04	-	106.04	0	22.62	0.49	1	-	-	-	-	-	-	-	163350	-	-	-	-	0.373901	0.0798571	NA	0	NA	0
1134		Feature_-_199.8042_20.1	199.804	-	199.804	0	20.14	0.1	1	-	-	-	-	-	102852	-	-	-	-	-	-	0.373901	1.98476	NA	0	NA	0
7226		Feature_+_140.0816_2.7	140.082	+	140.082	0.7	2.52	0.36	1	-	-	281144	-	-	-	-	-	-	-	-	-	NA	0	0.373901	0.32053	NA	0
5711		Feature_+_101.0712_0.6	101.071	+	101.071	0	0.62	0.46	2	-	206549	487945	-	-	-	-	-	-	-	-	-	NA	0	0.331895	0.657337	NA	0
7218		Feature_+_140.0815_0.6	140.082	+	140.082	0	0.62	0.48	1	-	-	508108	-	-	-	-	-	-	-	-	-	NA	0	0.373901	0.381926	NA	0
3193		Feature_-_98.9656_0.1	98.9656	-	98.9656	0	0.05	0.05	1	-	-	-	429803	-	-	-	-	-	-	-	-	NA	0	0.373901	0.0372329	NA	0
8304		Feature_+_167.0528_6.8	167.053	+	167.053	0	6.8	0.13	2	-	441006	-	-	-	-	-	372515	-	-	-	-	0.373901	0.0105988	0.373901	0.0976328	NA	0
3074		Feature_-_101.0596_4.3	101.06	-	101.06	-1	4.12	0.16	2	-	-	-	472195	-	-	-	458605	-	-	-	-	0.373901	0.018339	0.373901	0.0328762	NA	0
6184		Feature_+_116.0529_4.1	116.053	+	116.053	0	4.09	0.18	2	-	-	-	254261	-	-	-	297520	-	-	-	-	0.373901	0.450604	0.373901	0.338956	NA	0
2458		Feature_-_132.8668_16.8	132.867	-	132.867	0	16.82	0.35	1	-	173923	-	-	-	-	-	-	-	-	-	-	NA	0	0.373901	1.34929	NA	0
1151		Feature_-_197.8075_12.1	197.808	-	197.808	0	12.11	0.21	1	-	-	-	105965	-	-	-	-	-	-	-	-	NA	0	0.373901	2.06999	NA	0
3059		Feature_-_104.0341_11.8	104.034	-	104.034	0	11.76	0.13	1	-	-	110915	-	-	-	-	-	-	-	-	-	NA	0	0.373901	0.172108	NA	0
7217		Feature_+_140.0533_8.0	140.053	+	140.053	0	8.03	0.17	1	-	-	122091	-	-	-	-	-	-	-	-	-	NA	0	0.373901	0.237865	NA	0
2408		Feature_-_137.0346_8.0	137.035	-	137.035	0	8.02	0.14	1	-	-	135929	-	-	-	-	-	-	-	-	-	NA	0	0.373901	0.12418	NA	0
7733		Feature_+_150.0265_6.8	150.026	+	150.026	0	6.8	0.18	1	-	108687	-	-	-	-	-	-	-	-	-	-	NA	0	0.373901	0.00368635	NA	0
8621		Feature_+_172.1521_5.2	172.152	+	172.152	0	5.17	0.47	1	-	-	203101	-	-	-	-	-	-	-	-	-	NA	0	0.373901	0.189245	NA	0
2426		Feature_-_135.0441_3.5	135.044	-	135.044	0	3.5	0.13	1	-	143533	-	-	-	-	-	-	-	-	-	-	NA	0	0.373901	0.0144901	NA	0
10051		Feature_+_314.1940_2.7	314.194	+	314.194	0	2.74	0.23	1	-	116377	-	-	-	-	-	-	-	-	-	-	NA	0	0.373901	0.475813	NA	0
9996		Feature_+_286.2366_2.7	286.237	+	286.237	0	2.71	0.11	1	-	-	148153	-	-	-	-	-	-	-	-	-	NA	0	0.373901	0.0284797	NA	0
816		Feature_-_250.1444_2.6	250.144	-	250.144	0	2.63	0.1	1	-	-	-	160510	-	-	-	-	-	-	-	-	NA	0	0.373901	0.016135	NA	0
4550		Feature_+_73.0766_0.6	73.0766	+	73.0766	0	0.62	0.48	1	-	-	140340	-	-	-	-	-	-	-	-	-	NA	0	0.373901	0.304502	NA	0
5503		Feature_+_97.0763_0.6	97.0763	+	97.0763	0	0.62	0.46	1	-	-	125680	-	-	-	-	-	-	-	-	-	NA	0	0.373901	0.0818454	NA	0
5753		Feature_+_103.0868_0.6	103.087	+	103.087	0	0.62	0.48	1	-	-	129265	-	-	-	-	-	-	-	-	-	NA	0	0.373901	0.298019	NA	0
5918		Feature_+_110.0714_0.6	110.071	+	110.071	0	0.62	0.48	1	-	-	128288	-	-	-	-	-	-	-	-	-	NA	0	0.373901	0.177159	NA	0
6510		Feature_+_128.0818_0.6	128.082	+	128.082	0	0.62	0.49	1	-	-	123754	-	-	-	-	-	-	-	-	-	NA	0	0.373901	0.195925	NA	0
7020		Feature_+_137.0821_0.6	137.082	+	137.082	0	0.62	0.48	1	-	-	106797	-	-	-	-	-	-	-	-	-	NA	0	0.373901	0.129532	NA	0
1537		Feature_-_168.0269_11.5	168.027	-	168.027	0	11.53	0.26	6	-	71854	97192	99451	-	-	-	-	-	109349	103411	71679	0.00226512	-2.79382	0.735378	-0.0832133	0.00226512	2.79382	2.64491	2.64491	0.133489
10034		Feature_+_300.3318_10.7	300.332	+	300.332	0	10.69	0.46	2	-	-	-	144549	-	124534	-	-	-	-	-	-	0.373901	0.994165	0.373901	1.14073	NA	0
1339		Feature_-_180.0149_4.1	180.015	-	180.015	0	4.1	0.12	2	-	-	-	100005	-	-	-	101178	-	-	-	-	0.373901	0.0777994	0.373901	0.0716256	NA	0
2774		Feature_-_116.0785_3.3	116.079	-	116.079	0	3.28	0.17	2	-	-	-	116020	-	-	-	133178	-	-	-	-	0.373901	0.576625	0.373901	0.469997	NA	0
8310		Feature_+_168.0687_3.3	168.069	+	168.069	0	3.27	0.44	2	-	-	-	128563	-	-	-	59176	-	-	-	-	0.373901	0.00508759	0.373901	0.483907	NA	0
2490		Feature_-_130.0945_3.1	130.095	-	130.095	0	3.15	0.06	2	-	-	-	208949	-	-	-	159334	-	-	-	-	0.373901	0.528324	0.373901	0.751688	NA	0
5001	In-source fragment of GABA, "2-Pyrolidinone"	Feature_+_86.0604_11.3	86.0604	+	86.0604	0	11.32	0.28	6	-	591600	727898	687868	-	-	-	-	-	737728	707766	542379	0.000745787	-2.75564	0.933331	0.0140781	0.000745787	2.75564	3.12739	3.12739	0.0299642
1081		Feature_-_209.2474_23.0	209.247	-	209.247	0	22.96	0.35	5	113246	-	-	-	-	-	-	-	131405	119338	19549	58500	0.127043	-2.71799	0.127043	-2.71799	0.709316	-0.367494	0.14916	0.896049	0.896049
20		Feature_-_896.0358_22.8	896.036	-	896.036	0	22.83	0.26	9	39452	22233	32235	35154	38903	-	-	-	37287	110895	39592	32799	0.110227	-2.61106	0.284432	-1.03217	0.417849	0.664431	0.37898	0.957711	0.546022
4986		Feature_+_84.0448_11.6	84.0448	+	84.0448	0	11.57	0.44	6	-	130102	185832	179751	-	-	-	-	-	200021	147806	114355	0.00672686	-2.5896	0.733152	0.100963	0.00672686	2.5896	2.17219	2.17219	0.134806
1085		Feature_-_208.9651_22.7	208.965	-	208.965	0	22.66	0.06	3	32085	-	-	-	-	-	-	-	-	129327	-	25045	0.298525	-2.45393	0.298525	-2.45393	0.383055	1.65802	0.416738	0.525019	0.525019
5867		Feature_+_105.0741_11.3	105.074	+	105.074	0	11.34	0.31	6	-	200018	292665	228629	-	-	-	-	-	285528	247486	187250	0.00301394	-2.09457	0.993385	0.00209763	0.00301394	2.09457	2.52087	2.52087	0.00288235
177		Feature_-_637.3599_2.6	637.36	-	637.36	0	2.57	0.12	0	-	-	-	-	-	-	-	-	-	-	-	-	NA	0	NA	0	NA	0
1080		Feature_-_209.2556_22.9	209.256	-	209.256	0	22.91	0.17	3	-	155811	-	-	-	-	-	-	27226	96788	-	-	0.373901	-1.96086	0.745495	0.590133	0.475722	1.30624	0.322647	0.427243	0.127555
8664		Feature_+_177.0876_10.1	177.088	+	177.088	0	10.09	0.4	12	168966	50679	194040	140304	49621	88982	92547	111381	74103	740092	126367	106682	0.337035	-1.73219	0.407645	-1.3377	0.343103	1.73328	0.464576	0.472325	0.389718
10704		Feature_+_751.7706_22.9	751.771	+	751.771	0	22.88	0.37	12	54657	72561	76942	32810	48741	25685	28315	30422	35835	72935	105840	75589	0.00599431	-1.5912	0.243261	-0.480477	0.0323559	0.869393	1.49005	2.22226	0.613927
5330		Feature_+_94.9240_23.5	94.924	+	94.924	0	23.52	0.33	7	58245	-	-	-	92090	34010	43246	-	113089	-	81263	146726	0.280659	-1.43632	0.154695	-2.84606	0.857162	-0.139942	0.066937	0.551821	0.810523
2		Feature_-_979.6682_22.8	979.668	-	979.668	0	22.83	0.39	6	-	-	37951	18642	14134	28996	-	-	28796	114307	-	-	0.463291	-1.43195	0.556032	-1.01198	0.478557	1.33983	0.320066	0.334146	0.2549
4313		Feature_-_77.9346_22.8	77.9346	-	77.9346	0	22.79	0.48	11	48929	53956	69773	51997	92221	53229	-	32819	51951	116755	99528	76228	0.0139134	-1.4022	0.0403569	-0.735163	0.143389	0.599135	0.843485	1.85657	1.39408
7		Feature_-_931.1898_22.8	931.19	-	931.19	0	22.83	0.44	12	44072	36945	26643	39840	70570	43164	32082	47048	44413	142646	51965	125216	0.0793953	-1.38694	0.0619865	-1.62866	0.139694	1.00777	0.854821	1.10021	1.2077
13		Feature_-_909.0353_22.9	909.035	-	909.035	0	22.86	0.35	8	-	-	31668	30722	48214	-	-	50394	32623	103829	40874	39245	0.207012	-1.38577	0.172331	-1.34544	0.265263	1.01795	0.576323	0.684005	0.763638
2618		Feature_-_121.7632_22.9	121.763	-	121.763	0	22.86	0.41	9	34025	68289	19137	50530	36273	48894	-	-	34072	92196	-	104758	0.2118	-1.37275	0.460492	-0.631944	0.254932	1.03444	0.593575	0.674073	0.336778
10013		Feature_+_296.9176_22.3	296.918	+	296.918	-1.3	22.56	0.24	12	3210251	3741485	5325124	4220400	819969	933642	1120112	4448458	908803	8938589	1822130	6045639	0.219384	-1.37	0.609298	-0.338991	0.147882	1.76671	0.830085	0.658795	0.21517
5798	GABA	Feature_+_104.0708_11.3	104.071	+	104.071	0	11.35	0.29	6	-	5963087	7083248	6808030	-	-	-	-	-	7214268	6570809	5439832	0.00163775	-1.3664	0.7515	0.0464795	0.00163775	1.3664	2.78575	2.78575	0.124071
5799	GABA, peak tail	Feature_+_104.0708_11.6	104.071	+	104.071	0	11.37	0.08	6	-	4993622	7056472	6057996	-	-	-	-	-	7154602	6080070	4807041	0.00628393	-1.29568	0.981622	0.00529806	0.00628393	1.29568	2.20177	2.20177	0.0080558
3347		Feature_-_96.2071_22.9	96.2071	-	96.2071	0	22.93	0.46	8	35812	52286	-	57536	32485	42180	-	-	31389	105826	-	69843	0.218761	-1.25155	0.469662	-0.591879	0.268485	0.972955	0.571081	0.660029	0.328214
325		Feature_-_474.3609_23.1	474.361	-	474.361	-5.9	22.86	0.24	12	123541	46994	106660	86831	98303	37042	43268	50883	45241	91823	102620	114658	0.00154034	-1.23639	0.289364	-0.362131	0.590812	0.210779	0.228551	2.81238	0.538555
321		Feature_-_474.8590_22.9	474.859	-	474.859	0	22.89	0.48	12	48163	36371	39959	31441	49802	38360	33442	37547	44372	100507	43347	109420	0.0819005	-1.21176	0.0805497	-1.23273	0.14949	0.831388	0.825387	1.08671	1.09394
7280		Feature_+_142.9479_13.1	142.948	+	142.948	0	13.14	0.31	9	641228	-	704232	-	394685	345848	409668	-	727584	828484	986005	634860	0.0121777	-1.16763	0.0880242	-0.834165	0.183507	0.473959	0.736348	1.91444	1.0554
103		Feature_-_738.1107_22.7	738.111	-	738.111	0	22.73	0.24	12	52453	51399	44793	92229	42311	73353	37588	49407	99822	167835	106512	85460	0.0685234	-1.16602	0.118491	-0.933263	0.144352	0.886815	0.840577	1.16416	0.926313
7268		Feature_+_142.9478_14.7	142.948	+	142.948	0	14.52	0.19	6	306442	-	396280	-	-	-	-	-	346891	422448	486941	315184	0.0110499	-1.14848	0.151533	-0.679596	0.13914	0.548173	0.856547	1.95664	0.819494
7279		Feature_+_142.9479_12.9	142.948	+	142.948	-0.7	13.07	0.26	9	560903	-	650932	-	375340	321466	370934	-	727584	769109	909991	531759	0.0226228	-1.14779	0.11835	-0.809203	0.291238	0.410102	0.535751	1.64545	0.92683
4314		Feature_-_77.9280_22.9	77.928	-	77.928	0	22.86	0.39	8	35259	74613	-	42157	37285	45643	-	-	39247	43030	-	113653	0.36094	-1.13616	0.711395	-0.377703	0.518603	0.632301	0.285165	0.442565	0.147889
10778		Feature_+_877.7450_22.8	877.745	+	877.745	0	22.81	0.45	12	32770	30574	31509	28924	22501	25772	21413	30024	36263	104053	29927	34794	0.273525	-1.12825	0.339996	-0.891043	0.348963	0.882713	0.457221	0.563004	0.468526
71		Feature_-_789.7784_22.8	789.778	-	789.778	0	22.79	0.3	12	89671	36560	48519	31272	48432	47249	37199	37736	35999	114746	44328	106719	0.10042	-1.12125	0.0945679	-1.19182	0.329303	0.61037	0.482404	0.998179	1.02426
7281		Feature_+_142.9479_13.4	142.948	+	142.948	0	13.41	0.43	8	641228	-	737096	-	394685	-	409668	-	679536	842258	946946	634860	0.00964655	-1.11544	0.106593	-0.745106	0.13866	0.498842	0.85805	2.01563	0.972272
424		Feature_-_400.8669_22.3	400.867	-	400.867	0.5	22.59	0.21	12	3387116	2656404	7134262	7635972	2133581	2093651	2317782	8685623	2080365	11715259	4210948	12447233	0.209155	-1.1153	0.300518	-0.703247	0.0602466	1.90027	1.22007	0.679532	0.52213
126		Feature_-_705.7961_22.9	705.796	-	705.796	0	22.86	0.36	12	86968	95185	90776	99669	94629	113790	61243	45471	133507	159184	146080	169858	0.0175543	-1.10749	0.00100199	-0.73415	0.0288012	0.59247	1.54059	1.75562	2.99914
55		Feature_-_817.7283_22.7	817.728	-	817.728	0	22.69	0.48	4	34736	-	-	37395	-	-	-	39105	-	110004	-	-	0.526068	-1.09689	0.514945	-1.13707	0.498019	1.20187	0.302754	0.278958	0.288239
339		Feature_-_461.8357_23.2	461.836	-	461.836	0	23.21	0.39	11	87675	-	102746	61799	45280	44781	52925	70466	54125	111212	126008	122252	0.00191154	-1.09594	0.0683724	-0.921807	0.0136038	0.942224	1.86634	2.71862	1.16512
4308		Feature_-_78.9578_13.1	78.9578	-	78.9578	0	13.1	0.38	6	50563	-	67174	-	-	-	-	-	62263	80707	116222	49898	0.0849591	-1.09107	0.185831	-0.773264	0.193092	0.704684	0.714236	1.07079	0.730883
570		Feature_-_334.8956_22.3	334.896	-	334.896	0	22.59	0.22	12	3518936	7202468	7553765	7361372	1883624	2151136	2283962	7542284	1890687	9899077	4235476	11330759	0.183711	-1.08822	0.633986	-0.203338	0.0534251	1.8039	1.27225	0.735865	0.197921
115		Feature_-_719.4250_22.8	719.425	-	719.425	0	22.83	0.31	12	98263	42748	90757	42396	25849	38537	45547	41378	38078	129267	85463	51037	0.108736	-1.08291	0.341223	-0.595398	0.339095	0.712477	0.469679	0.963628	0.466962
7264		Feature_+_142.9477_14.5	142.948	+	142.948	0.7	14.29	0.06	8	472732	-	562165	-	263102	-	341552	-	478532	606657	692227	468381	0.0127686	-1.08013	0.127741	-0.74222	0.128192	0.541315	0.892139	1.89386	0.893669
6493		Feature_+_124.1001_9.8	124.1	+	124.1	0	9.84	0.45	8	-	15240	-	15469	-	40711	-	12760	11978	13923	12698	111114	0.515637	-1.07958	0.385242	-1.69943	0.354407	1.96092	0.450498	0.287656	0.414266
8164		Feature_+_164.9299_12.9	164.93	+	164.93	-0.6	13.14	0.26	8	336396	-	393725	-	214346	-	212404	-	387016	458399	513028	291099	0.0298077	-1.07945	0.163583	-0.697061	0.26775	0.429026	0.57227	1.52567	0.786262
2926		Feature_-_107.8698_22.8	107.87	-	107.87	0	22.76	0.43	12	66361	57106	86045	77464	57790	46806	55231	38773	55324	155360	106991	33526	0.221596	-1.07125	0.529048	-0.423467	0.336725	0.721215	0.472725	0.654438	0.276505
8146		Feature_+_164.9298_12.7	164.93	+	164.93	0.6	12.91	0.14	6	252953	-	316642	-	-	-	-	-	315375	315192	429194	197440	0.0699459	-1.06955	0.279955	-0.612977	0.417007	0.391654	0.379856	1.15524	0.552911
219		Feature_-_580.8093_22.9	580.809	-	580.809	0	22.86	0.4	12	134831	48467	112999	132877	105721	47713	48359	57384	49113	121380	107937	88884	0.005225	-1.05211	0.78428	-0.11244	0.741241	0.135553	0.130041	2.28191	0.105529
2928		Feature_-_107.8554_22.8	107.855	-	107.855	0	22.76	0.4	6	-	48292	-	35604	34675	40425	-	-	-	20926	-	104463	0.478013	-1.05194	0.67822	-0.513273	0.438842	1.1817	0.357692	0.32056	0.168629
8147		Feature_+_164.9298_13.2	164.93	+	164.93	0	13.23	0.35	8	356799	-	403317	-	241272	-	235412	-	420260	479909	524164	364107	0.00818283	-1.04791	0.0864317	-0.721685	0.175197	0.426051	0.756475	2.0871	1.06333
4309		Feature_-_78.9578_13.4	78.9578	-	78.9578	0	13.4	0.44	6	54599	-	67174	-	-	-	-	-	62263	86568	114014	55760	0.0601429	-1.03411	0.134813	-0.76711	0.142154	0.692791	0.847242	1.22082	0.870269
611		Feature_-_314.9115_22.7	314.911	-	314.911	0	22.72	0.47	12	48465	45775	50668	107698	90136	38414	44978	54388	129831	97315	54522	128178	0.0958534	-1.02314	0.434892	-0.455938	0.909066	0.0609474	0.0414044	1.01839	0.361619
7266		Feature_+_142.9478_13.9	142.948	+	142.948	0	13.88	0.45	8	599985	-	721850	-	365714	-	403229	-	613065	784279	888483	587579	0.0130328	-1.02065	0.141063	-0.657776	0.129663	0.517745	0.887184	1.88496	0.850587
8383		Feature_+_168.9457_22.3	168.946	+	168.946	-1.2	22.56	0.22	12	18294864	18071198	25307806	20809066	7249774	7251924	7730380	21473256	6983970	34691456	11581529	27574514	0.206369	-1.01841	0.67587	-0.202244	0.151527	1.18284	0.819509	0.685356	0.170137
5316		Feature_+_91.0506_5.0	91.0506	+	91.0506	0	5.01	0.41	3	102608	21144	-	-	-	-	-	-	-	-	-	83347	0.373901	-1.01654	0.378467	-1.00109	0.861325	-0.207819	0.0648328	0.427243	0.421972
32		Feature_-_860.7149_22.8	860.715	-	860.715	0	22.83	0.34	11	32842	-	37954	43380	35999	26103	43552	38840	42281	111791	44952	59205	0.163008	-0.993055	0.145033	-1.17699	0.163707	0.958539	0.785933	0.787791	0.838533
112		Feature_-_724.7686_22.9	724.769	-	724.769	0	22.86	0.45	12	45087	119736	110080	44628	57112	77350	42242	45930	53339	121498	110581	95038	0.0163787	-0.982784	0.518189	-0.253295	0.00249537	1.07254	2.60286	1.78572	0.285511
4310		Feature_-_78.9578_13.7	78.9578	-	78.9578	0	13.44	0.22	6	54599	-	61589	-	-	-	-	-	52515	83414	105289	50718	0.0692245	-0.971431	0.137018	-0.743614	0.136746	0.695751	0.864087	1.15974	0.863223
8165		Feature_+_164.9299_14.5	164.93	+	164.93	-0.6	14.29	0.08	8	223270	-	305332	-	170759	-	191504	-	256861	343292	382022	245625	0.0205543	-0.971349	0.138411	-0.672855	0.0889279	0.576967	1.05096	1.6871	0.85883
5744		Feature_+_102.0665_5.0	102.067	+	102.067	0	5.01	0.42	3	324876	80747	-	-	-	-	-	-	-	-	-	230795	0.373901	-0.96834	0.43335	-0.807466	0.780511	-0.343401	0.107621	0.427243	0.363161
7267		Feature_+_142.9478_14.2	142.948	+	142.948	0	14	0.19	8	565513	-	685810	-	349029	-	355393	-	598527	697546	805993	543688	0.0119297	-0.966259	0.177417	-0.570831	0.178165	0.436193	0.749178	1.92337	0.751004
610		Feature_-_314.9119_23.0	314.912	-	314.912	0	22.76	0.23	12	48465	49737	54770	120200	90136	38414	44978	54388	46814	97315	40830	128178	0.174583	-0.950811	0.705724	-0.245132	0.408536	0.522419	0.38877	0.757998	0.151365
8150		Feature_+_164.9298_14.2	164.93	+	164.93	-0.6	14	0.22	6	328960	-	395487	-	-	-	-	-	329040	421325	462484	314343	0.0121796	-0.945092	0.167083	-0.564169	0.137877	0.469308	0.860508	1.91437	0.777068
92		Feature_-_752.7635_22.8	752.764	-	752.764	0	22.83	0.43	11	34502	32825	33961	27050	19760	50808	28408	-	42830	39605	36804	103921	0.304289	-0.927976	0.260653	-0.942426	0.292968	0.893215	0.53318	0.516713	0.583937
2887		Feature_-_110.9744_6.1	110.974	-	110.974	0	6.06	0.1	4	-	225034	-	680768	-	-	-	-	276978	-	-	703982	0.373901	-0.920171	0.988858	0.0136935	0.457366	0.719916	0.339736	0.427243	0.00486591
8148		Feature_+_164.9298_13.6	164.93	+	164.93	0	13.64	0.48	7	368397	-	424721	-	-	-	240273	-	420260	479909	503745	364107	0.00808081	-0.915677	0.120245	-0.584349	0.197399	0.393898	0.704654	2.09254	0.919934
9543		Feature_+_217.9500_12.9	217.95	+	217.95	-1.4	13.02	0.23	6	69590	-	90654	-	-	-	-	-	85116	111432	129926	71240	0.0478029	-0.912955	0.151293	-0.63472	0.151866	0.573604	0.818538	1.32055	0.820181
11		Feature_-_919.6920_22.9	919.692	-	919.692	0	22.89	0.4	12	31433	21253	38873	39773	33435	43102	29075	38715	24008	47435	46821	114234	0.225937	-0.910823	0.193227	-1.06144	0.151804	1.23011	0.818718	0.646013	0.713932
9541		Feature_+_217.9494_13.2	217.949	+	217.949	0	13.23	0.46	6	77372	-	102693	-	-	-	-	-	92748	125518	139323	75066	0.0533653	-0.909524	0.182191	-0.605973	0.16732	0.560763	0.776451	1.27274	0.739472
1288		Feature_-_185.9753_22.7	185.975	-	185.975	0	22.66	0.43	12	42041	26161	37039	67700	36994	33291	36502	26955	34628	101579	30105	49064	0.263865	-0.901676	0.538486	-0.465515	0.356814	0.669217	0.447558	0.578618	0.268825
229		Feature_-_570.7252_23.3	570.725	-	570.725	0	23.29	0.08	12	98730	86615	147816	94072	69880	62216	75081	84054	67356	169034	129671	113626	0.0225721	-0.897467	0.332191	-0.327896	0.038135	0.805224	1.41868	1.64643	0.478612
170		Feature_-_644.7437_23.2	644.744	-	644.744	0	23.22	0.32	12	94600	95607	144950	115038	76818	78428	65676	92487	79147	162740	141813	135044	0.00400892	-0.893786	0.166846	-0.305947	0.00327998	0.810997	2.48413	2.39697	0.777683
2616		Feature_-_121.7750_22.8	121.775	-	121.775	0	22.83	0.45	12	61282	33224	60903	44241	44617	45496	39425	38173	45562	115548	84944	25533	0.265423	-0.876722	0.349799	-0.707972	0.408937	0.577536	0.388343	0.576062	0.456181
8149		Feature_+_164.9298_14.0	164.93	+	164.93	0	13.79	0.31	7	341676	-	397194	-	-	-	240273	-	373162	455159	489961	330257	0.0165387	-0.874252	0.13133	-0.580837	0.166038	0.436231	0.779792	1.7815	0.881637
81		Feature_-_769.7682_22.9	769.768	-	769.768	0	22.86	0.31	12	92281	32924	119947	107608	98994	60560	52598	106248	46213	129633	136907	133182	0.0234214	-0.865394	0.163923	-0.61783	0.0318493	0.751142	1.4969	1.63039	0.78536
506		Feature_-_356.3734_23.2	356.373	-	356.373	0	23.18	0.38	11	21923	47135	59367	65042	-	39211	48009	72439	56544	112040	101008	77695	0.0369384	-0.864751	0.0253655	-0.761166	0.0150867	1.58695	1.8214	1.43252	1.59576
21		Feature_-_895.7465_22.9	895.746	-	895.746	0	22.86	0.26	10	37128	30206	38922	-	-	33963	27913	38615	38061	33111	105206	44304	0.292679	-0.861786	0.223694	-1.20659	0.250975	1.10011	0.60037	0.533609	0.650346
263		Feature_-_532.7712_23.3	532.771	-	532.771	0	23.3	0.29	12	119989	83410	216170	119968	105421	78991	125913	110762	113193	157671	205121	207361	0.0163652	-0.85295	0.305706	-0.442513	0.00995146	0.751754	2.00211	1.78608	0.514697
5902		Feature_+_106.9718_22.3	106.972	+	106.972	-1.9	22.56	0.19	12	3429068	3649306	3801404	3838853	1766264	1878387	1617692	3489721	1874658	5314832	2581212	4692580	0.139135	-0.849623	0.629132	-0.157131	0.135602	0.832341	0.867735	0.856562	0.201258
824		Feature_-_246.9415_22.8	246.941	-	246.941	0	22.76	0.36	12	101395	51353	60200	83312	45810	65013	45374	57184	115157	118715	85367	97279	0.0168845	-0.84672	0.0598487	-0.629018	0.607169	0.199934	0.21669	1.77251	1.22294
3344		Feature_-_96.2169_22.8	96.2169	-	96.2169	0	22.76	0.34	12	56400	43645	97513	50423	48918	45022	38766	40164	56473	121335	59364	40556	0.255762	-0.835929	0.755878	-0.207756	0.464407	0.451579	0.333101	0.592165	0.121548
4452		Feature_-_70.6902_22.8	70.6902	-	70.6902	0	22.76	0.36	12	42744	42267	52372	35640	39814	40011	28667	32632	46728	114762	37162	28801	0.391314	-0.83502	0.577848	-0.472192	0.565936	0.48323	0.247233	0.407474	0.238186
75		Feature_-_776.8155_22.8	776.816	-	776.816	0	22.77	0.42	7	-	109821	-	31252	27163	-	-	23934	31229	-	24958	43067	0.345227	-0.828599	0.486894	0.953237	0.795017	0.190109	0.0996237	0.461896	0.312566
1896		Feature_-_158.9431_13.6	158.943	-	158.943	0	13.56	0.43	6	94091	-	107697	-	-	-	-	-	105845	129269	157856	91966	0.0445749	-0.826851	0.130257	-0.599612	0.17137	0.483322	0.766066	1.35091	0.8852
306		Feature_-_488.7801_23.3	488.78	-	488.78	0	23.3	0.09	12	91557	66015	131352	109843	42967	62108	69445	63622	76461	114402	107371	122486	0.000534809	-0.818726	0.565004	-0.164269	0.0415465	0.706354	1.38147	3.2718	0.247948
5609		Feature_+_98.0716_8.2	98.0716	+	98.0716	0	8.18	0.49	5	-	163711	159084	-	402201	-	-	239563	-	-	594112	-	0.515982	-0.818433	0.472428	-0.912048	0.749994	0.385232	0.124942	0.287366	0.325664
1893		Feature_-_158.9433_13.3	158.943	-	158.943	0	13.26	0.3	6	93131	-	107865	-	-	-	-	-	105722	129269	149553	91412	0.035458	-0.813515	0.12716	-0.576321	0.166355	0.460438	0.778963	1.45029	0.89565
442	Potassium Cluster Adduct	Feature_-_388.8508_23.3	388.851	-	388.851	0	23.29	0.47	12	340772	262209	443489	364568	257487	230824	280713	256230	333512	457828	445976	445040	0.000206307	-0.812983	0.152482	-0.333754	0.00670479	0.533676	2.17361	3.68549	0.816782
88		Feature_-_754.7495_22.8	754.75	-	754.75	0	22.79	0.34	12	32118	115160	47973	93170	57494	55176	36288	61275	105168	117630	106115	43899	0.187256	-0.809247	0.906602	-0.0624649	0.481766	0.45847	0.317164	0.727565	0.0425835
8151		Feature_+_164.9298_14.7	164.93	+	164.93	-0.6	14.66	0.21	6	140322	-	194578	-	-	-	-	-	149286	181803	211112	128903	0.0361999	-0.807938	0.342592	-0.40797	0.195758	0.423919	0.708282	1.44129	0.465222
5709		Feature_+_101.0711_8.3	101.071	+	101.071	0	8.25	0.49	5	-	113553	69037	-	278462	-	-	65176	-	-	205466	-	0.386978	-0.807615	0.612389	-0.426599	0.793755	-0.290482	0.100314	0.412314	0.212972
9774		Feature_+_234.9172_22.3	234.917	+	234.917	-0.4	22.57	0.19	12	10998382	9469856	10254189	10358951	4474468	5370214	4715632	13801227	4608764	15364975	9123604	17108920	0.195187	-0.800267	0.190843	-0.467549	0.0913885	1.05062	1.03911	0.70955	0.719323
218		Feature_-_586.6993_23.3	586.699	-	586.699	0	23.31	0.08	12	72595	76688	102273	84658	51471	42159	63543	75285	80350	114717	91036	109031	0.0207598	-0.798476	0.176234	-0.255908	0.0303517	0.622854	1.51782	1.68278	0.75391
786		Feature_-_255.2324_2.9	255.232	-	255.232	0.8	2.7	0.06	9	511799	-	534146	2453215	4430587	-	-	1113696	1850877	1580730	1242069	840722	0.155351	-0.797459	0.934309	-0.0723049	0.422861	-0.890874	0.373802	0.808687	0.0295095
9544		Feature_+_217.9500_13.5	217.95	+	217.95	-0.5	13.39	0.35	6	77372	-	102693	-	-	-	-	-	92748	125518	137022	75066	0.0665582	-0.793802	0.199523	-0.537994	0.173273	0.522478	0.76127	1.1768	0.700007
139		Feature_-_683.8150_23.1	683.815	-	683.815	-5.7	22.83	0.23	12	137976	131146	123221	115733	121534	48190	114084	131094	91130	228636	127566	150073	0.148515	-0.78721	0.216459	-0.452006	0.19713	0.529931	0.705246	0.828229	0.664624
10688		Feature_+_728.3189_22.9	728.319	+	728.319	0	22.94	0.41	12	61470	68850	76374	63341	68629	75432	76079	49891	76192	117786	98640	130691	0.0186603	-0.785344	0.0100574	-0.734925	0.0101339	0.750741	1.99422	1.72908	1.99751
2617		Feature_-_121.7686_22.9	121.769	-	121.769	0	22.9	0.41	11	52008	44304	47114	91526	83391	85199	-	24905	46555	104787	41227	82646	0.312674	-0.783772	0.561547	-0.321802	0.51604	0.32963	0.287317	0.504908	0.250614
10467		Feature_+_512.8016_23.3	512.802	+	512.802	0	23.28	0.25	12	69449	55499	102460	84140	51810	55920	58162	75581	52824	113184	110742	102055	0.00301694	-0.78135	0.117939	-0.429191	0.00158894	0.905013	2.79889	2.52043	0.928341
231		Feature_-_569.8344_22.7	569.834	-	569.834	0	22.69	0.25	12	43925	39827	33001	33434	33173	45219	30955	38954	29192	36847	53747	106676	0.270562	-0.776933	0.224767	-0.892546	0.230997	0.892166	0.636394	0.567733	0.648267
10405		Feature_+_440.8363_23.2	440.836	+	440.836	0	23.2	0.48	12	79634	77938	102470	115478	61191	65100	73578	86919	52689	122557	123795	139878	0.00317986	-0.775712	0.0711609	-0.384419	0.00271124	0.997022	2.56683	2.49759	1.14776
87		Feature_-_758.7513_23.0	758.751	-	758.751	0	22.95	0.44	12	133272	95134	132254	128682	106582	47363	108441	58645	120266	115118	123267	128665	0.0567962	-0.775342	0.783592	-0.0438157	0.802705	0.0274989	0.095444	1.24568	0.10591
1894		Feature_-_158.9433_13.9	158.943	-	158.943	0	13.74	0.29	6	94091	-	102502	-	-	-	-	-	93824	113618	151644	79235	0.0855424	-0.770373	0.209844	-0.538712	0.260467	0.432652	0.584248	1.06782	0.678103
7265		Feature_+_142.9477_15.2	142.948	+	142.948	0	15.37	0.26	6	330472	-	361834	-	-	-	-	-	335420	373944	445661	272015	0.0406626	-0.768208	0.226182	-0.46814	0.332632	0.311652	0.478036	1.3908	0.645542
10534		Feature_+_580.3647_22.8	580.365	+	580.365	0	22.77	0.37	12	73021	72180	53647	66266	66538	27928	47808	63923	103861	75857	74476	87448	0.0431512	-0.767725	0.0899691	-0.307828	0.885259	-0.0338143	0.0529295	1.36501	1.04591
158		Feature_-_661.4448_22.9	661.445	-	661.445	0	22.86	0.37	12	62166	51458	54038	37818	27374	50637	42352	112960	43322	110451	98468	141492	0.13435	-0.766761	0.00742437	-1.28987	0.0112393	1.39912	1.94926	0.871763	2.12934
4109		Feature_-_84.9896_23.0	84.9896	-	84.9896	-2.4	22.9	0.38	12	38049	88453	120235	116574	67512	54079	57278	41412	107231	55929	103644	99661	0.0912856	-0.762903	0.295116	0.327347	0.572329	0.284811	0.242354	1.0396	0.530007
10434		Feature_+_474.8462_23.3	474.846	+	474.846	0	23.26	0.35	12	153587	117598	203832	160457	99349	121235	123544	129471	112552	194376	200139	240435	0.0040938	-0.762641	0.151196	-0.397948	0.0146789	0.796819	1.83331	2.38787	0.820459
7269		Feature_+_142.9478_15.4	142.948	+	142.948	0	15.56	0.22	7	370659	-	411510	-	-	-	248193	-	402622	422031	512008	318597	0.0381307	-0.755873	0.213289	-0.468797	0.350195	0.296281	0.45569	1.41873	0.671033
7270		Feature_+_142.9478_15.7	142.948	+	142.948	0	15.67	0.47	6	370659	-	413788	-	-	-	-	-	402622	422031	539815	318597	0.0530498	-0.754092	0.222998	-0.477061	0.340948	0.319124	0.467312	1.27532	0.6517
12		Feature_-_909.3604_22.9	909.36	-	909.36	0	22.86	0.42	9	40878	-	-	30352	26154	26288	36712	39120	-	42388	26526	102756	0.380706	-0.749373	0.174049	-1.71576	0.276056	1.13832	0.559003	0.41941	0.759329
10342		Feature_+_388.8020_23.3	388.802	+	388.802	0	23.31	0.08	12	139903	91060	214733	117380	83121	91633	106787	124426	95501	180929	180750	179642	0.00154683	-0.745638	0.354199	-0.355237	0.0125765	0.765078	1.90044	2.81056	0.450753
7844		Feature_+_154.0564_9.3	154.056	+	154.056	0	9.3	0.33	12	30763	33849	24501	23397	28567	27787	35613	42180	39888	28747	43020	104520	0.37476	-0.73959	0.250705	-1.10869	0.335806	0.829252	0.473911	0.426247	0.600838
1892		Feature_-_158.9433_13.0	158.943	-	158.943	0	13.06	0.23	6	85155	-	107865	-	-	-	-	-	105722	111362	138998	80592	0.0595249	-0.734165	0.239297	-0.460567	0.293483	0.363754	0.532417	1.2253	0.621063
0		Feature_-_984.1707_22.9	984.171	-	984.171	0	22.92	0.33	12	113276	33400	39062	107338	34717	26459	45537	47194	42698	35269	52398	110459	0.329239	-0.733155	0.861719	-0.140025	0.94503	0.0551815	0.0245546	0.482489	0.0646344
10302		Feature_+_371.3145_2.8	371.315	+	371.315	0	2.55	0.18	6	-	-	-	9844385	6841151	-	-	644924	468061	1016952	-	393146	0.539327	-0.732829	0.427687	2.70381	0.421065	-2.26062	0.375651	0.268148	0.368874
191		Feature_-_620.7815_23.1	620.782	-	620.782	0	23.13	0.15	12	74287	71432	98501	66079	46874	64996	63873	72053	81228	128575	85942	119094	0.0283819	-0.731531	0.117682	-0.499307	0.0583067	0.721036	1.23428	1.54696	0.929291
10458		Feature_+_502.8109_23.2	502.811	+	502.811	0	23.18	0.42	12	85689	53309	86978	71950	60493	62274	54622	59475	46712	87535	100277	104469	0.00225437	-0.728743	0.0721352	-0.46168	0.056911	0.599548	1.2448	2.64698	1.14185
179		Feature_-_633.7926_22.9	633.793	-	633.793	0	22.87	0.32	12	106983	90735	143094	46448	105275	87798	44104	96447	106805	125718	113564	138133	0.048329	-0.724911	0.324065	-0.429298	0.0522048	0.24231	1.28229	1.31579	0.489368
149		Feature_-_666.7780_22.9	666.778	-	666.778	0	22.86	0.34	12	196767	121434	140202	118681	108172	128600	87171	84387	123554	153927	173516	168489	0.0134539	-0.72442	0.0126185	-0.38294	0.466393	0.210871	0.331248	1.87115	1.89899
3275		Feature_-_96.9684_13.2	96.9684	-	96.9684	0	13.17	0.48	10	1232184	938042	1314987	926292	-	-	912346	965554	1267764	1606580	1685439	1298968	0.00722814	-0.723801	0.0536505	-0.530086	0.0750262	0.432467	1.12479	2.14097	1.27043
5613		Feature_+_98.0717_5.0	98.0717	+	98.0717	0	5.01	0.44	3	1472999	801039	-	-	-	-	-	-	-	-	-	1151212	0.373901	-0.703685	0.702479	-0.285719	0.818235	-0.220457	0.0871221	0.427243	0.153367
1632		Feature_-_166.9563_22.3	166.956	-	166.956	-0.6	22.57	0.21	12	15854705	14554170	15598025	15091290	7945274	8938655	7726948	17095862	8951692	22075092	11330907	21493524	0.197459	-0.701416	0.409993	-0.279084	0.159897	0.745225	0.796159	0.704522	0.387224
10517		Feature_+_558.8290_23.3	558.829	+	558.829	0	23.28	0.34	12	255430	226234	401873	283992	166986	210395	192477	238617	196597	391790	306295	342179	0.00920399	-0.697453	0.497487	-0.189687	0.0173992	0.748908	1.75947	2.03602	0.303218
9788		Feature_+_236.0913_4.0	236.091	+	236.091	-1.3	3.85	0.24	6	116678	90161	85679	106577	-	-	-	-	82440	205834	-	-	0.373901	-0.697333	0.645871	-0.30766	0.60456	0.36733	0.21856	0.427243	0.189855
107		Feature_-_732.7564_22.9	732.756	-	732.756	0	22.93	0.49	12	44199	46361	45703	42668	33501	38408	45593	42455	58706	40303	111416	53245	0.2994	-0.696735	0.345266	-0.605278	0.377708	0.587463	0.422844	0.523749	0.461847
10800		Feature_+_938.2787_22.9	938.279	+	938.279	0	22.95	0.42	12	81208	28710	90011	63042	59908	54827	49094	53414	29343	79416	109348	66249	0.0646414	-0.696731	0.326306	-0.488512	0.226279	0.581146	0.645356	1.18949	0.486374
3274		Feature_-_96.9684_12.9	96.9684	-	96.9684	0	12.99	0.22	11	1232184	938042	1293613	926292	890082	-	897056	925879	1267024	1519088	1591177	1234158	0.00748817	-0.692204	0.0716916	-0.460178	0.121333	0.358181	0.916021	2.12562	1.14453
308		Feature_-_486.8523_22.7	486.852	-	486.852	6.2	22.86	0.22	12	46055	104013	110390	46532	83403	46612	51948	94269	42577	114617	86670	109696	0.0858809	-0.689514	0.491563	-0.253145	0.0415835	0.854134	1.38108	1.0661	0.30842
724		Feature_-_283.1365_2.6	283.137	-	283.137	0	2.62	0.13	9	112321	102684	83935	86509	67972	83731	-	74503	97942	230727	-	-	0.467154	-0.689169	0.646582	-0.384839	0.672716	0.358112	0.172168	0.33054	0.189376
448		Feature_-_383.8553_23.2	383.855	-	383.855	0	23.24	0.4	12	74257	60463	151001	57347	49818	46363	62418	92112	60205	106355	112112	105198	0.039329	-0.688074	0.584522	-0.267909	0.00328071	0.812602	2.48403	1.40529	0.233199
9542		Feature_+_217.9498_14.0	217.95	+	217.95	0	13.97	0.4	6	69612	-	99456	-	-	-	-	-	84887	97735	142298	84655	0.0786679	-0.686314	0.213941	-0.472718	0.134103	0.550074	0.872561	1.1042	0.669707
10306		Feature_+_372.8279_23.3	372.828	+	372.828	0	23.28	0.22	12	192038	144846	278283	206909	104241	130131	132168	186262	153999	236090	239691	246011	0.00807512	-0.686279	0.473141	-0.196144	0.0240688	0.680767	1.61855	2.09285	0.325009
10733		Feature_+_794.8047_23.2	794.805	+	794.805	0	23.19	0.4	12	73443	49267	110074	74098	47125	43996	55753	59560	41151	101800	70912	83384	0.0332878	-0.684857	0.722286	-0.133639	0.0783325	0.663196	1.10606	1.47771	0.141291
86		Feature_-_758.7784_22.9	758.778	-	758.778	0	22.86	0.36	12	47697	111657	62158	88567	102749	50873	112299	47518	130970	117053	98775	122809	0.127973	-0.684618	0.188007	-0.368071	0.49608	0.267035	0.304449	0.892883	0.725825
330		Feature_-_472.8077_23.3	472.808	-	472.808	0	23.26	0.26	12	120736	105345	190172	158074	83724	93020	112722	132525	107639	224284	163148	155714	0.0496429	-0.683178	0.415735	-0.259948	0.0337779	0.799336	1.47137	1.30414	0.381183
267		Feature_-_527.3290_22.9	527.329	-	527.329	0	22.86	0.41	12	52784	45243	45697	48395	49549	52520	71531	47248	45173	104963	93417	76522	0.0355565	-0.682401	0.00556723	-0.98036	0.00766262	0.898144	2.11562	1.44908	2.25436
3276		Feature_-_96.9684_13.4	96.9684	-	96.9684	0	13.29	0.31	8	1217186	-	1314987	932809	-	-	-	965554	1267764	1606580	1581370	1298968	0.00488649	-0.681773	0.0541381	-0.504163	0.0702553	0.399875	1.15332	2.311	1.2665
1895		Feature_-_158.9432_14.2	158.943	-	158.943	0.6	14.08	0.25	6	92198	-	91661	-	-	-	-	-	84178	107364	122493	91900	0.0102628	-0.681057	0.0566592	-0.513169	0.0864615	0.403412	1.06318	1.98873	1.24673
67		Feature_-_792.2390_22.9	792.239	-	792.239	0	22.94	0.48	12	55859	169660	109454	141842	34919	88526	60213	116567	103707	118663	144797	161391	0.0602312	-0.6793	0.9545	-0.0132875	0.032315	1.1273	1.4906	1.22018	0.0202239
434		Feature_-_394.8589_23.2	394.859	-	394.859	0	23.22	0.44	10	211901	157444	242165	220422	-	159844	158091	205677	-	353612	227546	256321	0.0640244	-0.677555	0.188891	-0.433713	0.0688259	0.683987	1.16225	1.19365	0.723788
10341		Feature_+_388.3410_2.6	388.341	+	388.341	0	2.55	0.27	7	-	-	147148	10203525	7281561	-	-	730465	474643	1102411	-	361985	0.60199	-0.677424	0.428665	2.71304	0.421855	-2.30292	0.374837	0.220411	0.367882
44		Feature_-_833.7388_22.8	833.739	-	833.739	0	22.83	0.24	12	110643	98262	120081	40147	88090	48210	53113	124367	56912	125376	118492	115815	0.145744	-0.672383	0.232983	-0.476618	0.0936938	0.492584	1.02829	0.83641	0.632676
10549		Feature_+_596.7844_23.3	596.784	+	596.784	0	23.28	0.22	12	91314	70426	95076	110653	42787	48129	82851	95703	47266	124938	104519	131338	0.0522082	-0.670503	0.118468	-0.385701	0.0266832	0.992267	1.57376	1.28226	0.9264
37		Feature_-_845.2195_22.9	845.22	-	845.22	0	22.93	0.42	12	37725	95556	55765	73566	39364	46983	97180	42023	104074	77110	137446	81331	0.235891	-0.668302	0.354048	-0.395846	0.261153	0.707758	0.583104	0.627288	0.450938
2371	Beta-nicotinamide Ribotide In-Source Fragment	Feature_-_140.9748_10.5	140.975	-	140.975	0	10.53	0.34	12	431954	499532	558806	498135	407092	371878	423301	427879	491918	646548	676705	620244	0.000584207	-0.668162	0.00749321	-0.320374	0.00243483	0.546183	2.61353	3.23343	2.12533
460		Feature_-_375.8682_23.1	375.868	-	375.868	0	23.15	0.3	12	192178	299943	349204	305535	126408	219261	202103	273482	272220	337175	373236	391536	0.00715473	-0.66529	0.0925733	-0.206963	0.0194477	0.899298	1.71113	2.14541	1.03351
10599		Feature_+_644.3364_22.9	644.336	+	644.336	0	22.92	0.44	12	31826	90269	68147	69752	63078	72763	68915	47553	102960	88213	134530	76161	0.133234	-0.659534	0.28596	-0.389586	0.283453	0.595173	0.547519	0.875384	0.543694
785		Feature_-_255.2324_2.4	255.232	-	255.232	0.4	2.66	0.07	7	-	-	-	2623236	4729739	-	-	1284704	2376124	1597258	1486668	827078	0.223992	-0.658089	0.967236	-0.0350986	0.359004	-0.977834	0.444901	0.649767	0.0144677
355		Feature_-_448.7880_23.3	448.788	-	448.788	0	23.33	0.27	12	358071	269208	504518	477765	212246	297244	286319	332905	327496	470767	544091	429027	0.00850621	-0.655799	0.476005	-0.206308	0.0308456	0.685469	1.51081	2.07026	0.322388
10497	Potassium Cluster Adduct	Feature_+_542.8560_23.2	542.856	+	542.856	0	23.22	0.39	12	408556	417496	592801	483485	283461	364476	359211	424747	341447	615137	605190	588874	0.000597126	-0.655685	0.111692	-0.276383	0.00219342	0.807865	2.65888	3.22393	0.951978
10660		Feature_+_710.8188_23.2	710.819	+	710.819	0	23.18	0.39	12	109180	76975	146981	106405	83941	71925	94755	110962	84399	133932	136346	166685	0.0264558	-0.654285	0.195169	-0.403468	0.0167466	0.654919	1.77607	1.57748	0.70959
3262		Feature_-_96.9685_12.7	96.9685	-	96.9685	-1	12.87	0.13	12	1024355	866608	1229063	870785	851629	806427	816728	919933	1133097	1285412	1539209	1167876	0.0138488	-0.65071	0.103249	-0.428551	0.0747016	0.407968	1.12667	1.85859	0.986116
10538		Feature_+_590.7761_23.3	590.776	+	590.776	0	23.33	0.36	12	224227	195997	310536	250441	179985	160866	173887	231289	205553	316059	297904	273989	0.0124284	-0.649573	0.283226	-0.230238	0.00632881	0.542228	2.19868	1.90559	0.547867
592	Potassium Cluster Adduct	Feature_-_326.8512_23.3	326.851	-	326.851	0	23.3	0.22	12	1614324	1136503	2546216	1584717	931923	1192061	1300768	1305964	1402344	2149099	2004118	1793100	0.00286032	-0.646455	0.625362	-0.174895	0.0424395	0.590658	1.37223	2.54359	0.203868
10443		Feature_+_478.7922_23.2	478.792	+	478.792	0	23.24	0.08	12	45106	46450	75872	73444	51106	57111	48739	54836	53013	100166	83264	67743	0.0357818	-0.644437	0.236899	-0.359551	0.0245041	0.751192	1.61076	1.44634	0.625437
134		Feature_-_686.2762_22.9	686.276	-	686.276	0	22.86	0.34	12	176573	132181	145785	286194	171393	119567	147884	163456	154711	240597	235552	197309	0.0125405	-0.644211	0.515166	-0.255484	0.0199222	0.421956	1.70066	1.90168	0.288053
9559		Feature_+_220.9246_13.6	220.925	+	220.925	0	13.57	0.45	6	59518	-	75608	-	-	-	-	-	64110	79241	108136	68044	0.062641	-0.641856	0.164157	-0.46739	0.103634	0.519433	0.984499	1.20314	0.78474
7271		Feature_+_142.9478_15.9	142.948	+	142.948	0	15.81	0.36	6	371067	-	413788	-	-	-	-	-	385713	407968	535180	317097	0.0761771	-0.639314	0.266949	-0.402871	0.345983	0.295999	0.460945	1.11818	0.573571
10379		Feature_+_412.8473_23.3	412.847	+	412.847	0	23.28	0.38	12	284841	226672	504630	331534	214629	254592	267062	319000	217086	412542	426299	469260	0.0039496	-0.63789	0.379468	-0.299555	0.00233668	0.868323	2.6314	2.40345	0.420825
10602		Feature_+_646.7033_23.4	646.703	+	646.703	0	23.4	0.09	12	58436	45192	101539	74136	35102	39100	47871	47180	33378	66542	85225	56698	0.0484964	-0.635947	0.832288	0.0833727	0.0796316	0.715931	1.09891	1.31429	0.0797261
60		Feature_-_803.0674_22.9	803.067	-	803.067	0	22.9	0.4	12	34491	34033	45618	105749	37581	38069	46882	43069	39791	46363	106496	46014	0.308579	-0.635478	0.888134	-0.101206	0.223669	0.830114	0.650395	0.510633	0.0515214
108		Feature_-_732.4244_22.8	732.424	-	732.424	0	22.83	0.34	12	98299	97570	87124	139397	32334	46538	32658	57282	91263	47494	108366	55874	0.284944	-0.633585	0.206365	0.614146	0.910461	-0.0676307	0.0407386	0.54524	0.685365
334		Feature_-_463.3683_22.8	463.368	-	463.368	0	22.83	0.24	12	48412	33757	45743	42445	39363	114921	41434	113751	115617	227985	87483	103403	0.382849	-0.63298	0.0905078	-1.78028	0.228106	1.04224	0.641863	0.416972	1.04331
248		Feature_-_554.7527_23.3	554.753	-	554.753	0	23.3	0.06	12	137042	101582	193745	129763	70737	91061	89144	107061	113420	179717	139605	126136	0.0365763	-0.632902	0.840692	-0.0675211	0.175697	0.471822	0.755236	1.4368	0.075363
10459		Feature_+_502.8363_23.2	502.836	+	502.836	0	23.23	0.43	12	105604	90509	161303	132943	78133	74040	100561	111075	109293	147883	140904	153230	0.0108276	-0.629722	0.412317	-0.200162	0.00897748	0.593053	2.04685	1.96547	0.384769
466		Feature_-_371.8459_23.3	371.846	-	371.846	0	23.27	0.27	12	114686	83929	186880	99484	42481	56389	58693	95773	51822	108775	116936	100473	0.0476805	-0.629435	0.673425	0.182981	0.167003	0.642259	0.777276	1.32166	0.171711
662		Feature_-_300.3227_22.8	300.323	-	300.323	16.6	22.69	0.32	12	96427	45327	117232	41443	81620	98317	48838	23380	118100	98850	42435	122269	0.391866	-0.628031	0.592589	-0.369515	0.697	-0.168215	0.156767	0.406862	0.227247
404		Feature_-_406.8216_23.4	406.822	-	406.822	0	23.36	0.24	12	68290	67407	88592	84020	54410	51573	59360	83715	71440	91488	99837	109300	0.0322126	-0.627097	0.0703214	-0.324816	0.00841575	0.630868	2.07491	1.49197	1.15291
10271		Feature_+_356.8545_23.2	356.854	+	356.854	0	23.23	0.43	12	297006	281773	570377	368688	229715	255051	290786	343314	271722	478483	434863	456851	0.00494487	-0.623883	0.595343	-0.166512	0.00121992	0.779122	2.91367	2.30584	0.225233
1840		Feature_-_162.9590_22.3	162.959	-	162.959	-0.6	22.59	0.23	12	13651445	12317437	20778470	20072180	9728325	10974001	10340463	21312808	9932495	24208976	14934917	26530908	0.200646	-0.623563	0.402869	-0.304779	0.0456824	0.979286	1.34025	0.697569	0.394836
10691		Feature_+_732.8009_23.2	732.801	+	732.801	0	23.18	0.4	12	97702	64058	103610	122311	60045	69992	72840	102595	96795	127989	112608	137289	0.0252285	-0.622657	0.190641	-0.382003	0.045604	0.570047	1.341	1.59811	0.719784
10746		Feature_+_816.7866_23.2	816.787	+	816.787	0	23.19	0.32	12	56035	65393	104049	70992	48749	52714	67906	80345	64743	119766	96940	92706	0.0356123	-0.622585	0.192832	-0.363888	0.00827057	0.868014	2.08246	1.4484	0.71482
5729		Feature_+_101.0713_5.0	101.071	+	101.071	0	5.01	0.42	3	819103	321715	-	-	-	-	-	-	-	-	-	615871	0.373901	-0.622045	0.492916	-0.455484	0.785063	-0.247381	0.105095	0.427243	0.307227
61		Feature_-_802.7388_22.6	802.739	-	802.739	-8	22.76	0.23	12	235858	247927	274882	202546	167576	184678	129968	162691	252744	217108	231898	284149	0.0298253	-0.61911	0.933576	-0.015431	0.480705	0.160031	0.318122	1.52541	0.0298505
781		Feature_-_255.2325_2.7	255.232	-	255.232	0	2.68	0.1	7	-	-	-	2623236	4766633	-	-	1349032	2376124	1597258	1486668	840722	0.253783	-0.619002	0.966718	-0.0353597	0.358592	-0.980879	0.445399	0.595537	0.0147
403		Feature_-_408.8546_23.2	408.855	-	408.855	0	23.18	0.26	12	282501	421359	473275	375774	204904	228735	384914	349411	308743	573230	423752	479780	0.0562219	-0.61674	0.255736	-0.217145	0.0133392	0.891329	1.87487	1.25009	0.592208
10247		Feature_+_350.8474_23.3	350.847	+	350.847	0	23.26	0.2	12	386529	324804	619014	474101	208603	367501	370033	375998	289421	550331	505436	647238	0.00939532	-0.61294	0.372331	-0.264308	0.0146769	0.945062	1.83337	2.02709	0.429071
344		Feature_-_456.8077_14.9	456.808	-	456.808	0	14.87	0.16	0	-	-	-	-	-	-	-	-	-	-	-	-	1	0	1	0	1	0
9987		Feature_+_282.8387_23.4	282.839	+	282.839	0	23.37	0.11	12	2897261	2687711	4476605	3188777	1959560	2140122	2245764	3394378	2558480	3885464	4099504	3903367	0.0282833	-0.611656	0.394719	-0.199485	0.00618542	0.68097	2.20863	1.54847	0.403712
10240		Feature_+_344.8391_23.4	344.839	+	344.839	0	23.37	0.11	12	1030575	861635	1588521	1411302	735045	908756	694403	1342822	810681	1529608	1574866	1382233	0.0616124	-0.606909	0.409407	-0.216511	0.00386602	0.800356	2.41274	1.21033	0.387845
589		Feature_-_328.8492_23.3	328.849	-	328.849	0	23.33	0.29	12	151543	131926	204947	173880	97354	110333	111747	120406	137951	188587	175825	157161	0.00347438	-0.606824	0.883197	-0.0302434	0.0738303	0.431102	1.13177	2.45912	0.0539423
7228		Feature_+_140.0816_3.3	140.082	+	140.082	0	3.26	0.42	4	-	-	-	239742	141218	-	-	131468	-	-	-	312576	0.42859	-0.604985	0.779494	-0.213818	0.45462	0.56508	0.342351	0.367958	0.108187
9560		Feature_+_220.9249_13.0	220.925	+	220.925	0	13.02	0.37	5	68003	-	80233	-	-	-	-	-	75230	83797	104865	-	0.141467	-0.600712	0.35223	-0.374424	0.407011	0.300211	0.390393	0.849345	0.453174
7293		Feature_+_142.9666_22.8	142.967	+	142.967	0	22.81	0.42	12	63911	87735	77476	69769	98648	55280	80543	78136	106602	96712	101549	126156	0.0388751	-0.600515	0.0468606	-0.465311	0.312889	0.26938	0.504609	1.41033	1.32919
765		Feature_-_262.8775_23.3	262.877	-	262.877	0	23.31	0.08	12	218643	200668	316974	275219	151354	190723	162685	190770	215125	323199	247980	253935	0.0224174	-0.600515	0.809326	-0.0575255	0.0699953	0.495856	1.15493	1.64942	0.0918768
307		Feature_-_486.8526_22.9	486.853	-	486.853	0	22.94	0.45	12	83236	122162	110390	90888	83403	50668	51948	102763	42577	114617	86670	109696	0.140617	-0.598547	0.757246	0.0566624	0.102568	0.571843	0.988987	0.851961	0.120763
353		Feature_-_450.8407_23.0	450.841	-	450.841	0	22.96	0.44	0	-	-	-	-	-	-	-	-	-	-	-	-	1	0	1	0	1	0
2746		Feature_-_117.0183_10.7	117.018	-	117.018	0	10.68	0.34	12	204634	159494	247047	280250	127380	130204	124424	276183	144388	254603	206903	342000	0.225441	-0.598111	0.507361	-0.226438	0.0766999	0.754129	1.11521	0.646967	0.294683
102		Feature_-_738.7538_22.6	738.754	-	738.754	0.1	22.79	0.23	12	436165	593645	581220	472863	643686	507459	341631	550548	492496	757250	650478	710239	0.027714	-0.597626	0.0334562	-0.362202	0.0583714	0.42976	1.2338	1.5573	1.47552
329		Feature_-_472.8315_23.3	472.832	-	472.832	0	23.26	0.33	12	99940	119399	154738	162963	87445	87863	105288	100330	74871	181443	123048	139601	0.0503998	-0.597591	0.920444	-0.0228952	0.0322767	0.759883	1.49111	1.29757	0.0360026
9787		Feature_+_236.0912_3.8	236.091	+	236.091	0	3.77	0.19	7	125704	104169	117431	124148	-	84381	-	-	96788	212188	-	-	0.37976	-0.596398	0.820277	-0.126606	0.620544	0.30691	0.207227	0.42049	0.0860397
109		Feature_-_732.0876_22.8	732.088	-	732.088	0	22.83	0.35	12	248554	185744	215914	212608	186698	167090	149363	165628	190981	223743	217568	287078	0.0231475	-0.595434	0.190769	-0.245846	0.317652	0.21801	0.498048	1.6355	0.719493
1		Feature_-_983.6658_22.9	983.666	-	983.666	0	22.87	0.37	12	150667	107231	201972	124203	162990	123429	108175	134608	146666	191768	170811	190279	0.00366956	-0.59423	0.25428	-0.35119	0.0209382	0.264262	1.67906	2.43539	0.594688
10527		Feature_+_574.8017_23.3	574.802	+	574.802	0	23.28	0.16	12	199211	179396	320384	239768	141178	195635	172388	243974	166842	348879	305080	269712	0.0288942	-0.593854	0.260098	-0.320735	0.00810785	0.864736	2.09109	1.53919	0.584862
844		Feature_-_238.8644_23.6	238.864	-	238.864	0	23.62	0.44	12	34350	100816	54764	39808	66205	59896	49705	48113	72352	89715	51031	97281	0.144558	-0.593814	0.574575	-0.284783	0.306745	0.461129	0.513222	0.839959	0.240653
3205		Feature_-_98.9655_11.2	98.9655	-	98.9655	0	10.94	0.25	12	893703	840586	1198804	1045157	656586	702163	739411	1185975	755861	1277858	1185870	1500261	0.0699048	-0.593235	0.103579	-0.361894	0.00885657	0.781467	2.05273	1.15549	0.98473
372		Feature_-_433.1136_5.6	433.114	-	433.114	0	5.55	0.21	12	91066	127686	84188	103202	58011	75264	52156	88802	72705	228818	61595	35652	0.583467	-0.592646	0.955597	-0.0494597	0.600868	0.556017	0.221221	0.233984	0.0197253
641		Feature_-_310.8771_23.2	310.877	-	310.877	0	23.22	0.49	12	2869862	2712786	4099200	3318684	1917969	2123645	2451553	3007289	2866182	4258848	3801602	3364182	0.0246982	-0.591405	0.417202	-0.173418	0.0370903	0.577859	1.43074	1.60733	0.379653
343		Feature_-_456.8338_23.2	456.834	-	456.834	0	23.19	0.41	12	273251	225884	447670	321730	169023	243400	232771	354017	241263	390791	402169	457108	0.033137	-0.590497	0.276181	-0.328826	0.00696828	0.870915	2.15687	1.47969	0.558806
507		Feature_-_355.8719_23.2	355.872	-	355.872	0	23.18	0.3	12	392636	452116	701030	522544	405989	376669	401894	606290	414896	759712	691392	631966	0.0461839	-0.588978	0.176192	-0.313956	0.00150408	0.779512	2.82273	1.33551	0.754015
6579		Feature_+_128.9533_22.3	128.953	+	128.953	0	22.57	0.19	12	86466624	82438600	83066664	83489560	46180448	50243336	46854140	98015672	44461180	105823728	71566384	115842080	0.198992	-0.587732	0.333171	-0.235928	0.113797	0.727412	0.943871	0.701163	0.477333
3314		Feature_-_96.9680_15.0	96.968	-	96.968	3.1	14.81	0.27	12	850081	597160	1003299	705984	609370	645579	644342	657040	843299	1006284	1061450	856107	0.00610496	-0.586641	0.204786	-0.342195	0.107523	0.344507	0.968497	2.21432	0.688699
2158		Feature_-_145.0498_10.6	145.05	-	145.05	0	10.62	0.38	12	61283	60561	61505	66921	59186	52091	50279	67741	65807	83875	53337	117242	0.218305	-0.580928	0.304886	-0.429118	0.287892	0.449963	0.540771	0.660937	0.515862
10453		Feature_+_490.8194_23.3	490.819	+	490.819	0	23.34	0.29	12	153988	152720	244290	213356	130640	138182	108151	178463	155560	209536	223838	201373	0.0307859	-0.579411	0.783688	-0.0565071	0.00336167	0.528062	2.47345	1.51165	0.105857
371		Feature_-_434.8248_15.0	434.825	-	434.825	0	14.98	0.14	0	-	-	-	-	-	-	-	-	-	-	-	-	NA	0	NA	0	NA	0
10156		Feature_+_328.8650_23.3	328.865	+	328.865	0	23.28	0.26	12	962049	784017	1627788	1271783	806413	960621	1007355	1096684	941793	1717737	1468973	1392427	0.00888869	-0.579349	0.32063	-0.313964	0.0047423	0.756647	2.32401	2.05116	0.493996
256		Feature_-_538.7783_23.3	538.778	-	538.778	0	23.27	0.27	12	157694	119127	275140	153475	109691	117911	144324	158279	113933	205213	213939	208883	0.00463746	-0.578691	0.602455	-0.197348	0.00613405	0.71985	2.21225	2.33372	0.220075
527		Feature_-_346.0551_11.0	346.055	-	346.055	0.3	10.77	0.05	12	656516	744250	2550210	606040	494856	591796	488257	882292	342456	1024237	804878	1098145	0.0941936	-0.576972	0.63502	0.414108	0.0194327	0.970537	1.71147	1.02598	0.197213
305		Feature_-_488.8080_23.3	488.808	-	488.808	0	23.33	0.31	12	149280	80069	136020	134152	67289	85810	78843	109367	96925	142976	142928	122839	0.01703	-0.576913	0.374623	-0.222846	0.271136	0.382756	0.566813	1.76879	0.426405
122		Feature_-_716.7849_22.9	716.785	-	716.785	0	22.9	0.38	12	92001	109959	173599	59169	45790	154695	53795	102082	136877	206932	166741	88916	0.325622	-0.574803	0.451257	-0.432671	0.223204	0.752042	0.651298	0.487286	0.345576
486		Feature_-_366.8431_23.3	366.843	-	366.843	0	23.26	0.23	12	570080	504958	887949	600637	356736	433581	536076	541038	502039	901000	742026	606583	0.0554002	-0.574462	0.58302	-0.174339	0.0609785	0.654815	1.21482	1.25649	0.234317
6089		Feature_+_114.0665_5.0	114.067	+	114.067	0	5.01	0.41	3	194654	92263	-	-	-	-	-	-	-	-	-	133103	0.373901	-0.574305	0.666472	-0.267861	0.722381	-0.328127	0.141234	0.427243	0.176218
10498		Feature_+_544.7504_23.4	544.75	+	544.75	0	23.4	0.09	12	80353	76109	146495	96690	58207	80740	89126	105879	68753	137915	123132	149368	0.0133011	-0.573749	0.24363	-0.362198	0.00241787	0.985273	2.61657	1.87611	0.613269
10003		Feature_+_290.8834_23.3	290.883	+	290.883	0	23.26	0.49	12	980711	1179674	2233306	1139214	714997	1009989	899947	1196187	979242	1612709	1600296	1409783	0.00961405	-0.573648	0.951573	-0.0222012	0.00413137	0.789251	2.38391	2.01709	0.0215581
10245		Feature_+_348.0697_11.0	348.07	+	348.07	-1.1	10.78	0.04	12	2800623	2357952	7054773	5219803	1590429	2142775	2567730	5330110	1820947	4952564	5099954	4856818	0.180507	-0.570368	0.949478	-0.027037	0.00154866	1.26309	2.81005	0.743507	0.0225151
29		Feature_-_873.3771_22.9	873.377	-	873.377	0	22.86	0.4	12	120185	98286	139817	133709	137109	76323	119758	118418	104227	168628	159201	138366	0.0397737	-0.567878	0.116164	-0.32636	0.055483	0.366854	1.25584	1.4004	0.934928
399		Feature_-_410.8336_23.3	410.834	-	410.834	0	23.26	0.48	12	159709	114516	206901	129123	72239	124127	133296	146278	118616	220374	205376	172465	0.0140035	-0.567377	0.198503	-0.409009	0.0463617	0.770986	1.33384	1.85376	0.702234
10522		Feature_+_564.8380_23.2	564.838	+	564.838	0	23.22	0.46	12	161384	133014	270112	200159	101181	120292	163480	172708	126753	279134	182516	214459	0.0886733	-0.566704	0.644499	-0.164416	0.0456168	0.796307	1.34088	1.05221	0.190778
651		Feature_-_302.8898_23.2	302.89	-	302.89	0	23.21	0.45	12	51318	61596	87115	75544	47239	67913	58510	59941	58198	92036	111556	72175	0.0640703	-0.565327	0.273907	-0.29831	0.0283266	0.814938	1.54781	1.19334	0.562397
10445		Feature_+_480.8545_23.3	480.854	+	480.854	0	23.26	0.41	12	161893	159808	263293	181944	98197	134346	131552	161148	161179	219219	181001	230952	0.0186955	-0.563642	0.815175	-0.0609908	0.0542834	0.583291	1.26533	1.72826	0.088749
10562		Feature_+_612.7574_23.3	612.757	+	612.757	0	23.34	0.22	12	77308	79692	127040	101357	74348	74421	56609	86799	77980	110563	98765	112121	0.0237531	-0.561394	0.771334	-0.0612427	0.00217236	0.485241	2.66307	1.62428	0.112757
3277		Feature_-_96.9684_13.8	96.9684	-	96.9684	0	13.78	0.47	6	1133776	-	1292658	-	-	-	-	-	1125222	1426396	1526273	1257774	0.00446669	-0.56139	0.0704895	-0.39825	0.0275601	0.391369	1.55972	2.35001	1.15188
9653	Potassium Cluster Adduct	Feature_+_228.9094_23.3	228.909	+	228.909	0	23.26	0.26	12	765322	758464	1260063	876395	541907	715729	797095	822546	665463	1158118	1150476	1134970	0.000359423	-0.560251	0.294085	-0.250378	0.00165219	0.803737	2.78194	3.44439	0.531528
7272		Feature_+_142.9478_16.2	142.948	+	142.948	0	16.19	0.48	6	371067	-	415923	-	-	-	-	-	396515	409068	536671	328185	0.0877775	-0.559276	0.274113	-0.360457	0.350988	0.270995	0.454708	1.05662	0.562071
295		Feature_-_500.8226_23.2	500.823	-	500.823	0	23.18	0.32	12	236639	182245	282113	290683	181390	185369	191223	288687	207316	349069	324483	305852	0.0429213	-0.557945	0.113242	-0.375349	0.00434197	0.647252	2.36231	1.36733	0.945992
10301		Feature_+_371.3145_2.5	371.315	+	371.315	0	2.53	0.25	7	-	-	165771	10306696	7783603	-	-	841274	538400	1116079	-	402809	0.658044	-0.555631	0.429129	2.67338	0.415673	-2.34689	0.381248	0.181745	0.367413
93		Feature_-_750.7086_23.2	750.709	-	750.709	0	23.22	0.47	12	46072	45459	79117	89868	42919	71580	21183	66548	39760	101949	57451	74652	0.293256	-0.554983	0.743301	-0.126228	0.0550593	0.862245	1.25917	0.532753	0.128836
374		Feature_-_432.8147_23.3	432.815	-	432.815	0	23.26	0.29	12	530363	460561	799232	499865	348267	464393	529901	556246	459680	851254	667190	759172	0.0153889	-0.554754	0.221759	-0.372229	0.01401	0.767112	1.85356	1.81279	0.654119
10212		Feature_+_334.8732_23.3	334.873	+	334.873	0	23.26	0.42	12	827161	919144	1578288	848638	600372	735588	815669	875478	831085	1126104	1309465	1128754	0.00653147	-0.554612	0.777039	-0.0911605	0.0111096	0.658188	1.9543	2.18499	0.109557
4110		Feature_-_84.9894_22.7	84.9894	-	84.9894	0	22.69	0.32	12	85800	88453	120235	116574	57963	54079	64034	52114	41013	55929	65623	128202	0.312316	-0.553048	0.36711	0.381094	0.453951	0.43473	0.342991	0.505406	0.435204
1150		Feature_-_197.9722_10.6	197.972	-	197.972	0	10.6	0.08	12	250203	185139	311139	223630	170429	163041	239280	241451	179969	290097	366847	287430	0.0522034	-0.552808	0.175229	-0.391546	0.0340142	0.652951	1.46834	1.2823	0.756395
10581		Feature_+_626.8361_23.2	626.836	+	626.836	0	23.18	0.39	12	136711	127876	216450	174055	102161	103184	123727	162564	122511	173915	144014	253309	0.176571	-0.552561	0.692622	-0.140079	0.109653	0.660563	0.959981	0.753081	0.159504
332		Feature_-_464.7625_23.4	464.762	-	464.762	0	23.36	0.09	12	223995	237870	377886	235499	189706	219321	205628	242488	195393	351205	310298	317352	0.00332473	-0.552464	0.432068	-0.201504	0.00171331	0.68443	2.76616	2.47824	0.364448
8152		Feature_+_164.9298_15.4	164.93	+	164.93	0	15.35	0.24	6	170988	-	219402	-	-	-	-	-	215622	239532	261800	158168	0.0906634	-0.552131	0.29782	-0.344916	0.329787	0.29769	0.481766	1.04257	0.526045
235		Feature_-_567.7981_23.2	567.798	-	567.798	0	23.16	0.27	11	-	58753	72099	90572	39118	54922	49247	76994	53049	111336	83064	71054	0.127299	-0.551174	0.385783	-0.26165	0.0252367	1.12377	1.59797	0.895173	0.413656
8854		Feature_+_195.1223_3.3	195.122	+	195.122	0	3.28	0.04	2	-	-	-	-	25799984	-	-	-	-	-	14729761	-	0.373901	-0.0386019	0.373901	-0.0386019	0.416521	-0.337707
311		Feature_-_485.3525_22.8	485.353	-	485.353	0	22.76	0.47	12	33985	29268	43209	110018	34363	35459	45137	40289	119798	48657	82447	45612	0.199748	-0.547797	0.947659	0.0464243	0.907774	-0.0904199	0.042022	0.699517	0.0233481
8153		Feature_+_164.9298_15.8	164.93	+	164.93	0	15.81	0.48	6	205500	-	234327	-	-	-	-	-	243299	254638	290996	172882	0.0962448	-0.547619	0.283015	-0.354344	0.44597	0.229943	0.350695	1.01662	0.548191
331		Feature_-_464.9858_10.5	464.986	-	464.986	0	10.53	0.32	12	56793	77270	72708	73081	57158	49415	59674	80138	81233	90097	83676	102717	0.0519926	-0.547109	0.0369008	-0.309802	0.0510353	0.502393	1.29213	1.28406	1.43296
10355		Feature_+_396.8730_23.3	396.873	+	396.873	0	23.26	0.28	12	549229	475113	975791	612769	425888	491432	484052	600350	441663	834451	714969	750107	0.00953149	-0.545222	0.635483	-0.156123	0.00498492	0.698721	2.30234	2.02084	0.196896
294		Feature_-_504.7808_23.3	504.781	-	504.781	0	23.35	0.11	12	148763	171232	147228	150707	98482	100010	139916	151722	113800	200263	170992	198405	0.0315169	-0.540544	0.0500313	-0.28	0.0169096	0.657922	1.77187	1.50146	1.30076
533		Feature_-_342.8249_23.4	342.825	-	342.825	0	23.36	0.28	12	964546	840418	1442598	896232	633566	782792	882291	996723	987567	1386451	1247560	1236318	0.00680815	-0.540051	0.309484	-0.283771	0.026061	0.581913	1.58401	2.16697	0.509362
10756		Feature_+_833.7839_22.9	833.784	+	833.784	0	22.91	0.42	12	104784	109371	85839	103518	80224	67234	69901	107249	129626	150423	97215	106889	0.153021	-0.536746	0.355694	-0.247063	0.573241	0.172221	0.241663	0.815249	0.448923
250		Feature_-_548.7451_23.3	548.745	-	548.745	0	23.33	0.13	12	128104	70575	159040	110741	66603	75976	92250	114019	114805	156274	124830	127795	0.0471537	-0.534797	0.452298	-0.2647	0.19319	0.401749	0.714016	1.32648	0.344575
1102		Feature_-_205.9160_23.3	205.916	-	205.916	0	23.3	0.12	12	136386	110770	215010	133311	87629	104034	111221	121775	103274	154382	201695	131805	0.0769168	-0.533655	0.811965	-0.0877521	0.10002	0.575967	0.999912	1.11398	0.0904629
69		Feature_-_791.7339_22.8	791.734	-	791.734	0	22.83	0.27	12	386049	361831	513417	384548	404738	406018	275036	465662	443578	519133	480495	659161	0.0944538	-0.532622	0.138141	-0.39694	0.0676118	0.426361	1.16998	1.02478	0.859678
10731		Feature_+_790.8151_22.9	790.815	+	790.815	0	22.85	0.41	12	82791	74600	92950	90053	96030	92065	36508	73746	95730	96521	113729	82279	0.183179	-0.531948	0.338898	-0.18343	0.584355	0.0915055	0.233323	0.737124	0.469931
511		Feature_-_350.8694_23.2	350.869	-	350.869	0	23.22	0.49	12	1457889	1099127	1672858	1456318	769041	858510	1039058	1432446	1079206	1795723	1482938	1528759	0.0654241	-0.529735	0.375207	-0.185184	0.0870204	0.540117	1.06038	1.18426	0.425729
140		Feature_-_683.8123_22.8	683.812	-	683.812	0	22.79	0.26	12	137976	131146	123221	241071	121534	105690	114084	131094	58109	228636	127566	150073	0.17578	-0.528993	0.944586	-0.0312167	0.183343	0.672624	0.736736	0.755031	0.0247583
395		Feature_-_416.8412_23.2	416.841	-	416.841	0	23.22	0.44	12	1378823	1086990	1645315	1458698	810068	1015960	1116410	1555604	1088071	2106932	1638197	1576166	0.0819893	-0.528949	0.183432	-0.344482	0.0439044	0.699418	1.35749	1.08624	0.736524
431		Feature_-_398.7914_23.4	398.791	-	398.791	0	23.36	0.08	12	266323	244545	350242	261846	185755	199323	203866	272663	218164	333132	343085	298697	0.0216695	-0.528568	0.327636	-0.186598	0.0197364	0.540593	1.70473	1.66415	0.484609
9644		Feature_+_224.9120_23.3	224.912	+	224.912	0	23.28	0.36	12	175227	161262	343070	199058	149176	164758	226583	188042	204773	275413	295332	264171	0.013511	-0.527114	0.47842	-0.247306	0.00526065	0.657883	2.27896	1.86931	0.320191
419		Feature_-_400.8674_22.1	400.867	-	400.867	0.5	22.29	0.26	0	-	-	-	-	-	-	-	-	-	-	-	-	NA	0	NA	0	NA	0
169		Feature_-_648.1179_22.9	648.118	-	648.118	0	22.93	0.48	12	163980	67317	118630	101912	107491	33877	123044	143431	115038	177996	125784	129038	0.305847	-0.527106	0.0999447	-0.588398	0.56238	0.163258	0.24997	0.514495	1.00024
10004		Feature_+_290.9091_23.2	290.909	+	290.909	0	23.23	0.47	12	517866	512629	648090	490702	333843	411862	435692	456609	389727	611997	565367	701250	0.010267	-0.526544	0.297849	-0.185961	0.034628	0.597659	1.46057	1.98855	0.526003
10548		Feature_+_594.7977_22.9	594.798	+	594.798	0	22.92	0.41	12	100266	116278	70942	97053	72853	84254	76357	65824	79423	108976	125285	91860	0.0394303	-0.52631	0.440373	-0.19813	0.125738	0.368884	0.900534	1.40417	0.35618
212		Feature_-_598.6622_23.5	598.662	-	598.662	0	23.49	0.22	12	61913	64611	69454	55607	40323	61839	48754	63215	59964	71052	101255	77902	0.0676673	-0.525639	0.113826	-0.399627	0.0625101	0.62536	1.20405	1.16962	0.943759
10354		Feature_+_396.8466_23.3	396.847	+	396.847	0	23.26	0.42	12	204675	180860	288611	211598	144184	135133	175907	247935	161007	262155	280755	261161	0.0717916	-0.524539	0.277856	-0.239522	0.00684206	0.657205	2.16481	1.14393	0.556181
10454		Feature_+_496.8277_23.3	496.828	+	496.828	0	23.28	0.44	12	86483	69297	147499	79278	55054	76937	80475	98724	70211	133228	130449	104716	0.0297078	-0.524336	0.409527	-0.315288	0.0152447	0.798897	1.81688	1.52713	0.387717
85		Feature_-_760.7481_22.9	760.748	-	760.748	0	22.89	0.45	12	141574	201135	149609	164636	114828	148730	105534	127129	84068	169488	158679	219756	0.0697687	-0.522695	0.677821	-0.0883366	0.0511255	0.686445	1.29136	1.15634	0.168885
10414		Feature_+_446.7914_23.4	446.791	+	446.791	0	23.37	0.14	12	79250	89949	129783	88198	72248	72879	75160	86503	70070	116220	118456	101863	0.00707553	-0.520927	0.547726	-0.128171	0.00287952	0.603024	2.54068	2.15024	0.261436
7889		Feature_+_157.0834_22.4	157.083	+	157.083	-0.6	22.68	0.19	12	573189	653126	535229	860421	544087	596097	541924	514444	426443	689408	605790	1075102	0.177762	-0.52045	0.569093	-0.210307	0.142765	0.61866	0.845377	0.75016	0.244816
166		Feature_-_652.8110_22.8	652.811	-	652.811	0	22.79	0.46	12	183166	227688	211808	146921	138053	154440	148494	156939	132523	203772	208299	247347	0.00909264	-0.519958	0.438557	-0.169266	0.0317645	0.539321	1.49806	2.04131	0.357974
10542		Feature_+_592.7783_23.3	592.778	+	592.778	0	23.34	0.36	12	69360	69480	103973	67790	44237	60950	46195	75337	45832	87541	92169	81790	0.0420214	-0.519057	0.608446	-0.116324	0.0171109	0.713897	1.76673	1.37653	0.215778
10618		Feature_+_664.7960_23.3	664.796	+	664.796	0	23.28	0.37	12	57997	53074	109757	49529	29876	59697	66009	64466	61753	100897	89993	81585	0.00968722	-0.518819	0.379409	-0.359612	0.023617	0.864763	1.62677	2.0138	0.420892
432		Feature_-_397.8632_23.2	397.863	-	397.863	0	23.17	0.38	0	-	-	-	-	-	-	-	-	-	-	-	-	1	0	1	0	1	0
433		Feature_-_397.8574_22.9	397.857	-	397.857	0	22.86	0.36	0	-	-	-	-	-	-	-	-	-	-	-	-	NA	0	NA	0	NA	0
9925		Feature_+_268.9019_23.3	268.902	+	268.902	0	23.26	0.4	12	182625	189948	323186	180193	140252	193441	231180	173587	193419	284045	261597	310557	0.0174992	-0.517299	0.323419	-0.30441	0.00624247	0.729748	2.20464	1.75698	0.490234
8857		Feature_+_195.1233_3.0	195.123	+	195.123	-5.1	3.26	0.03	2	-	-	-	-	23465478	-	-	-	-	-	14078239	-	0.373901	-0.0542647	0.373901	-0.0542647	0.439073	-0.308796
269		Feature_-_526.8400_22.9	526.84	-	526.84	0	22.87	0.39	12	393358	371601	468412	410335	339446	286213	308635	349561	433932	456442	438001	455473	0.00226937	-0.515386	0.312801	-0.11054	0.0947886	0.210391	1.02324	2.64409	0.504732
10356		Feature_+_398.7678_23.4	398.768	+	398.768	0	23.4	0.14	12	288911	262733	316622	311433	193015	205573	254476	288765	226853	361729	338186	369620	0.0145581	-0.514304	0.0383426	-0.26383	0.0153585	0.593576	1.81365	1.8369	1.41632
10395		Feature_+_428.8204_23.3	428.82	+	428.82	0	23.34	0.27	12	257550	246829	506654	299022	218305	220772	213314	287486	214564	345087	354397	330490	0.0139012	-0.513393	0.929418	0.0312192	0.00182866	0.577064	2.73787	1.85695	0.0317887
509		Feature_-_352.8673_23.2	352.867	-	352.867	0	23.22	0.49	12	90057	69610	125850	89713	51319	52521	68877	104574	69546	128709	106486	86581	0.178609	-0.509913	0.583127	-0.174219	0.0890757	0.609347	1.05024	0.748096	0.234237
10295		Feature_+_366.3720_2.5	366.372	+	366.372	0	2.53	0.16	6	-	-	-	118315	196835	-	-	16359	24942	31852	-	17134	0.326333	-0.509378	0.475024	1.21624	0.387693	-1.90574	0.411512	0.486339	0.323285
83		Feature_-_767.4139_22.9	767.414	-	767.414	0	22.9	0.42	12	243861	150221	239701	178643	210017	146461	163686	233696	167389	293933	215466	264215	0.0947789	-0.508424	0.121991	-0.444289	0.185758	0.3164	0.731053	1.02329	0.913674
8855		Feature_+_195.1223_3.5	195.122	+	195.122	-0.5	3.33	0.04	2	-	-	-	-	23150756	-	-	-	-	-	14729761	-	0.373901	-0.0642354	0.373901	-0.0642354	0.461268	-0.271622
443		Feature_-_387.1836_2.6	387.184	-	387.184	0	2.59	0.16	0	-	-	-	-	-	-	-	-	-	-	-	-	1	0	1	0	1	0
10296		Feature_+_366.8201_23.3	366.82	+	366.82	0	23.31	0.07	12	262715	211562	416399	303017	218717	264369	210860	281559	200261	334812	347053	393932	0.0188926	-0.507445	0.479196	-0.208587	0.0070624	0.658212	2.15105	1.72371	0.319487
445		Feature_-_385.1654_2.7	385.165	-	385.165	0	2.74	0.13	0	-	-	-	-	-	-	-	-	-	-	-	-	NA	0	NA	0	NA	0
10046		Feature_+_306.8572_23.3	306.857	+	306.857	0	23.28	0.09	12	422889	334930	841518	558707	282122	427905	476045	475455	321079	641124	600134	715866	0.00677848	-0.504689	0.648602	-0.173671	0.00452334	0.931578	2.34454	2.16887	0.188022
1746		Feature_-_165.9725_22.9	165.972	-	165.972	0	22.86	0.11	12	1090014	1176323	1193888	1205736	848014	937404	786570	1042962	918345	1404200	1265978	1253046	0.0122213	-0.50375	0.0779563	-0.133714	0.0147951	0.457855	1.82988	1.91288	1.10815
10775		Feature_+_873.8016_22.8	873.802	+	873.802	0	22.81	0.32	12	299119	322272	386227	336330	325876	249498	270443	310020	265784	420174	406378	345906	0.0168074	-0.498421	0.228438	-0.166269	0.030664	0.396397	1.51337	1.7745	0.641232
10807		Feature_+_957.7842_22.9	957.784	+	957.784	0	22.88	0.38	12	241135	176873	212555	207675	189005	126434	187478	217257	171437	264034	284250	201598	0.116574	-0.497493	0.135206	-0.328684	0.202979	0.317914	0.692549	0.933398	0.869005
436		Feature_-_390.8777_22.7	390.878	-	390.878	0	22.69	0.4	12	117352	100629	130194	50575	110863	104103	92134	49718	128190	153385	133827	59974	0.362802	-0.497314	0.582612	-0.303097	0.920408	-0.0378088	0.0360198	0.44033	0.23462
7282		Feature_+_142.9479_16.5	142.948	+	142.948	-0.7	16.28	0.3	6	340008	-	415923	-	-	-	-	-	380162	407020	482707	309381	0.0816491	-0.495072	0.341801	-0.286519	0.320426	0.256533	0.494272	1.08805	0.466226
3258		Feature_-_96.9685_11.2	96.9685	-	96.9685	0	10.94	0.26	12	2912774	2457973	3683323	3032910	1884442	2044550	2190659	3834879	2211505	3589470	3578936	4194843	0.145818	-0.493719	0.14846	-0.30872	0.0164925	0.697152	1.78271	0.836189	0.82839
40		Feature_-_842.7624_22.9	842.762	-	842.762	0	22.9	0.39	12	42820	30218	34089	41297	26069	33626	26565	65966	38039	36862	103590	37031	0.536133	-0.492461	0.346001	-0.749016	0.359953	0.731041	0.443755	0.270727	0.460922
10020		Feature_+_298.8128_24.0	298.813	+	298.813	-0.7	23.75	0.05	12	434567	361969	448174	321999	321851	366695	420000	313479	342163	445687	625392	476275	0.0786064	-0.492072	0.107145	-0.450748	0.0842871	0.494162	1.07424	1.10454	0.970029
647		Feature_-_304.8692_23.3	304.869	-	304.869	0	23.33	0.28	12	1241157	968458	1717845	1370287	858787	997082	1081431	1054022	947333	1666314	1250371	1485543	0.0262385	-0.490903	0.666093	-0.117966	0.0537487	0.530713	1.26963	1.58106	0.176465
41		Feature_-_840.6972_23.2	840.697	-	840.697	0	23.16	0.17	12	112892	86466	149137	116500	85977	87285	91071	138481	99863	172593	152204	120151	0.129981	-0.489896	0.261199	-0.337639	0.0466002	0.574785	1.33161	0.88612	0.583028
8154		Feature_+_164.9298_16.1	164.93	+	164.93	0	16.12	0.46	6	210065	-	240916	-	-	-	-	-	222244	233739	291122	196944	0.0648551	-0.489709	0.268722	-0.306595	0.278132	0.257878	0.55575	1.18806	0.570696
274		Feature_-_522.8060_23.2	522.806	-	522.806	0	23.19	0.41	12	265013	271908	365555	332258	210597	220600	264547	365475	261159	371912	390241	431630	0.0692258	-0.488951	0.0837966	-0.299899	0.00360724	0.696256	2.44283	1.15973	1.07677
2511		Feature_-_123.9484_10.6	123.948	-	123.948	0	10.6	0.17	12	83880	76017	74875	97980	70333	60768	79532	77850	92636	103688	120729	81617	0.0841569	-0.488371	0.233555	-0.298288	0.205099	0.310063	0.688036	1.07491	0.631611
2596		Feature_-_122.9663_22.3	122.966	-	122.966	-0.8	22.59	0.21	12	14326899	13669700	19548038	18281020	11118077	11890347	11973226	20215832	12155472	21948236	16257604	23628844	0.170779	-0.488312	0.294362	-0.263879	0.02898	0.717666	1.5379	0.767565	0.531119
1176		Feature_-_193.9783_10.6	193.978	-	193.978	0	10.58	0.09	12	326340	357524	438306	351646	230329	259822	283508	454538	342566	458327	472060	468507	0.0953432	-0.487366	0.041326	-0.285823	0.0091507	0.637517	2.03855	1.02071	1.38378
1086		Feature_-_208.9545_22.6	208.954	-	208.954	0	22.62	0.46	12	27055	48022	37876	30937	35816	32077	43108	51951	38937	33714	36837	107635	0.530506	-0.487011	0.453241	-0.608911	0.355616	0.807533	0.449018	0.27531	0.343671
463		Feature_-_374.2439_2.6	374.244	-	374.244	0	2.61	0.16	0	-	-	-	-	-	-	-	-	-	-	-	-	NA	0	NA	0	NA	0
464		Feature_-_373.1681_2.6	373.168	-	373.168	0	2.59	0.1	0	-	-	-	-	-	-	-	-	-	-	-	-	NA	0	NA	0	NA	0
9094		Feature_+_205.0010_11.9	205.001	+	205.001	0	11.91	0.21	12	107472	104106	95090	86010	92611	109692	99823	90868	146787	159791	132173	127938	0.024812	-0.483249	0.0163509	-0.558048	0.269301	0.275658	0.569762	1.60534	1.78646
10463		Feature_+_508.7961_23.4	508.796	+	508.796	0	23.44	0.33	12	57368	61677	90357	63727	56011	61703	54956	67986	43977	80210	101755	76088	0.0498299	-0.482913	0.311945	-0.258233	0.0204854	0.713635	1.68856	1.30251	0.505921
10554		Feature_+_606.7533_23.4	606.753	+	606.753	0	23.37	0.23	12	322750	272993	388552	319934	232134	194916	248256	334034	229333	384797	326518	374013	0.0812763	-0.481762	0.414197	-0.145102	0.0475629	0.468806	1.32273	1.09004	0.382794
8155		Feature_+_164.9298_16.4	164.93	+	164.93	0	16.44	0.48	6	193123	-	240916	-	-	-	-	-	215322	233739	290546	196944	0.0665868	-0.480766	0.272139	-0.300863	0.192649	0.31261	0.715234	1.17661	0.56521
247		Feature_-_557.8394_22.8	557.839	-	557.839	0	22.76	0.25	12	273627	304563	233952	218411	264309	258004	215147	329055	274765	376012	335260	406930	0.0546982	-0.479136	0.0232316	-0.562957	0.00836755	0.460384	2.0774	1.26203	1.63392
324		Feature_-_474.3622_22.8	474.362	-	474.362	0	22.76	0.42	12	123541	46994	115283	124948	98303	106168	43268	50883	51262	61900	102620	114658	0.359998	-0.478886	0.931387	0.0409961	0.942832	0.0317242	0.0255659	0.4437	0.03087
1100		Feature_-_205.9652_23.1	205.965	-	205.965	-1.5	22.93	0.08	12	536679	403844	595224	538552	415061	416248	532203	577651	369306	600190	792517	731851	0.0551028	-0.477311	0.0714204	-0.466464	0.0239623	0.685482	1.62047	1.25883	1.14618
10716		Feature_+_770.3106_22.9	770.311	+	770.311	0	22.91	0.41	12	78201	71862	111402	66686	71228	72145	65678	83239	70772	125438	97794	84495	0.0921775	-0.4772	0.358262	-0.300012	0.0765896	0.48283	1.11583	1.03537	0.445799
89		Feature_-_754.4144_22.8	754.414	-	754.414	0	22.8	0.43	12	114097	135732	117772	102454	101947	53064	97523	125989	58024	94697	156181	134117	0.263671	-0.477164	0.659805	-0.113133	0.209756	0.490306	0.678287	0.578937	0.180584
9813	Unknown, top non-salt down-regulated feature on volcano of Bafilomycin	Feature_+_240.9954_2.9	240.995	+	240.995	0	2.9	0.27	6	78079	-	51362	-	102433	37292	-	-	48798	61402	-	-	0.684936	-0.475845	0.880872	-0.179509	0.101404	-1.418	0.993944	0.16435	0.055087
10774		Feature_+_873.8014_23.1	873.801	+	873.801	0.2	22.88	0.29	12	299119	309082	386227	336330	325876	249498	270443	262402	265784	334725	406378	345906	0.0116847	-0.474491	0.591765	-0.0754257	0.0814689	0.287224	1.08901	1.93238	0.227851
10624		Feature_+_675.3355_23.0	675.336	+	675.336	7.6	22.89	0.32	12	96660	116675	143421	97370	90393	83348	91167	96051	109152	138536	111627	125579	0.0151734	-0.473762	0.713435	-0.0719364	0.0496779	0.343146	1.30384	1.81892	0.146645
10625		Feature_+_675.3371_22.8	675.337	+	675.337	0	22.79	0.29	12	110608	116675	163625	97370	90393	83348	91167	96051	109152	138536	111627	125579	0.0151734	-0.473762	0.977217	0.0073838	0.0972198	0.276762	1.01225	1.81892	0.010009
10685		Feature_+_724.6818_23.4	724.682	+	724.682	0	23.44	0.15	12	83764	60275	72548	72706	42469	77582	71370	67003	65669	129716	84168	85971	0.139697	-0.473534	0.111567	-0.544923	0.132576	0.643895	0.877534	0.854813	0.952465
187		Feature_-_628.7703_23.2	628.77	-	628.77	0	23.2	0.4	12	195890	215570	381324	298724	169664	200710	171276	315237	255872	345460	263784	344731	0.159967	-0.473173	0.741402	-0.0910679	0.0408235	0.618369	1.38909	0.795969	0.129946
84		Feature_-_767.4076_22.6	767.408	-	767.408	0.7	22.73	0.34	12	139587	117953	145793	178643	135725	115920	163235	179442	167389	162865	209493	264215	0.164774	-0.473099	0.130836	-0.52501	0.104985	0.523993	0.978871	0.783111	0.883274
72		Feature_-_789.7391_22.8	789.739	-	789.739	0	22.76	0.49	12	104378	44655	113454	146691	96430	57019	47899	105615	135202	181014	48923	62283	0.582922	-0.473009	0.939164	0.060808	0.754684	-0.201449	0.122235	0.234389	0.0272587
630		Feature_-_312.8752_23.2	312.875	-	312.875	0	23.21	0.49	12	115598	129652	143596	143186	86407	84598	99137	137114	132443	173630	151391	120204	0.132942	-0.47264	0.584503	-0.0964467	0.146273	0.412753	0.834837	0.876338	0.233213
354		Feature_-_450.7881_23.3	450.788	-	450.788	0	23.33	0.13	12	64082	48734	104508	78186	37558	75606	58882	67007	51885	90356	95928	93293	0.00691559	-0.472502	0.377617	-0.272682	0.00582787	0.864772	2.23449	2.16017	0.422948
394		Feature_-_418.8384_23.2	418.838	-	418.838	0	23.18	0.49	12	63362	42136	94908	88627	44574	51280	65477	63285	43083	124422	72619	52556	0.348655	-0.471267	0.78331	-0.14538	0.215989	0.724871	0.665568	0.457604	0.106066
237		Feature_-_562.7987_23.2	562.799	-	562.799	0	23.22	0.27	12	147761	165411	204547	146227	109439	112181	130996	158225	121490	187445	183718	184638	0.0185037	-0.469521	0.485385	-0.10668	0.00654846	0.553551	2.18386	1.73274	0.313914
59		Feature_-_803.4039_22.9	803.404	-	803.404	0	22.87	0.3	11	36516	27061	104338	-	22295	34767	32456	70675	29719	103964	40561	46404	0.497439	-0.469435	0.675108	-0.411823	0.173583	1.1088	0.760493	0.30326	0.170627
487		Feature_-_364.8728_23.0	364.873	-	364.873	0	23.02	0.37	0	-	-	-	-	-	-	-	-	-	-	-	-	NA	0	NA	0	NA	0
488		Feature_-_364.8719_22.7	364.872	-	364.872	0	22.7	0.48	0	-	-	-	-	-	-	-	-	-	-	-	-	NA	0	NA	0	NA	0
10399		Feature_+_434.8304_23.3	434.83	+	434.83	0	23.28	0.27	12	77062	87506	125208	93518	59477	60191	66121	93237	71197	98756	114211	90877	0.0837764	-0.468788	0.955989	0.0112942	0.0202622	0.54858	1.69331	1.07688	0.0195473
10050	Potassium Cluster Adduct	Feature_+_312.8911_23.3	312.891	+	312.891	0	23.26	0.39	12	1799974	1889201	3087354	1896232	1298288	1797664	1846664	1946402	1659756	2767603	2462960	2505352	0.00241602	-0.468535	0.521006	-0.170677	0.00498952	0.701211	2.30194	2.6169	0.283158
10811		Feature_+_969.7782_22.9	969.778	+	969.778	0	22.88	0.36	12	78474	72377	98923	92359	89771	98754	70068	60182	91745	82865	135267	98014	0.208592	-0.465218	0.373922	-0.261918	0.309838	0.282135	0.508865	0.680703	0.427219
3278		Feature_-_96.9684_14.1	96.9684	-	96.9684	0	14.1	0.43	6	1132075	-	1172602	-	-	-	-	-	1024755	1284546	1438950	1128834	0.0168872	-0.464021	0.0863261	-0.344289	0.0753403	0.31917	1.12297	1.77244	1.06386
7273		Feature_+_142.9478_16.8	142.948	+	142.948	0	16.76	0.42	6	356880	-	394939	-	-	-	-	-	385391	406082	501161	310068	0.113295	-0.463608	0.293832	-0.307783	0.381793	0.231945	0.418172	0.945788	0.531901
2485		Feature_-_131.0341_10.7	131.034	-	131.034	0	10.66	0.46	12	105494	72977	98427	100521	71222	54952	54872	138062	61962	109299	83059	148836	0.407898	-0.460915	0.334641	-0.327383	0.215636	0.515527	0.66628	0.389448	0.47542
9810		Feature_+_240.8851_23.3	240.885	+	240.885	0	23.31	0.07	12	78182	56694	108115	94896	54250	69426	60297	79366	63764	101339	100283	85575	0.0255181	-0.457924	0.602585	-0.145167	0.0244608	0.549745	1.61153	1.59315	0.219982
6854		Feature_+_136.0616_7.1	136.062	+	136.062	0	6.89	0.23	12	118042	119392	172322	99055	72562	107389	109324	129622	138881	172506	201047	102155	0.226918	-0.457908	0.48248	-0.28376	0.239613	0.529864	0.620489	0.644132	0.316521
497		Feature_-_359.1521_2.6	359.152	-	359.152	0	2.57	0.13	0	-	-	-	-	-	-	-	-	-	-	-	-	1	0	1	0	1	0
2255		Feature_-_144.9742_22.3	144.974	-	144.974	-0.7	22.57	0.25	12	10466759	9898007	9757759	9854109	6940242	7491101	6862684	11436588	7790666	13589852	8250714	13534759	0.233204	-0.455911	0.331566	-0.261546	0.175742	0.489453	0.755124	0.632264	0.47943
3346		Feature_-_96.2113_22.7	96.2113	-	96.2113	0	22.69	0.41	10	47145	64268	51411	90756	89445	102099	-	-	52368	45459	46690	103435	0.626322	-0.451319	0.879324	0.0778992	0.929046	0.0497228	0.031963	0.203202	0.0558513
10304		Feature_+_372.3180_2.5	372.318	+	372.318	0	2.53	0.4	6	-	-	-	2298452	1600570	-	-	90214	76828	137960	-	52395	0.594709	-0.45092	0.396278	3.37485	0.390584	-2.90555	0.408286	0.225695	0.402
268		Feature_-_526.8403_23.1	526.84	-	526.84	0	22.9	0.26	12	367412	371601	268522	387950	285394	219714	308635	334252	335135	456442	267458	455099	0.215415	-0.450797	0.52894	-0.19762	0.396635	0.255066	0.401609	0.666725	0.276593
8		Feature_-_930.6882_22.6	930.688	-	930.688	-2.5	22.79	0.21	12	819009	794759	922009	994486	658606	665432	687436	889886	724462	1112781	1077172	875237	0.0560347	-0.450705	0.27875	-0.177016	0.0301576	0.477112	1.5206	1.25154	0.554785
10623		Feature_+_674.8383_22.8	674.838	+	674.838	0	22.81	0.29	12	426492	468271	530451	514119	482908	394929	420783	485601	596287	644704	600078	533394	0.0195251	-0.45043	0.0768016	-0.233138	0.201497	0.239976	0.695731	1.70941	1.11463
5693		Feature_+_100.1124_13.3	100.112	+	100.112	-1	13.59	0.21	8	374869	349883	812515	345508	-	-	-	315578	-	506581	336764	412978	0.0854128	-0.449442	0.633106	0.263339	0.167007	0.359342	0.777265	1.06848	0.198524
157		Feature_-_661.8320_22.8	661.832	-	661.832	0	22.76	0.24	12	51819	81512	54090	119689	37260	38627	43221	100814	86469	106839	101769	40818	0.487868	-0.449435	0.948588	0.0335308	0.393025	0.506746	0.405579	0.311698	0.0229222
2258		Feature_-_144.9691_10.6	144.969	-	144.969	0	10.6	0.16	12	119674	108865	147085	109691	103818	92008	119628	125946	118691	152386	188864	118725	0.14774	-0.446317	0.257864	-0.331128	0.133381	0.426787	0.874907	0.830503	0.588609
10426		Feature_+_462.8180_23.1	462.818	+	462.818	0	23.15	0.48	12	102841	88450	143114	103545	72837	84785	94798	109098	103336	143411	128051	121789	0.0217065	-0.445974	0.330661	-0.23082	0.0333835	0.495113	1.47647	1.66341	0.480618
39		Feature_-_844.7208_22.7	844.721	-	844.721	0	22.74	0.43	12	255147	273949	260249	292499	268562	183498	212607	278653	226915	315706	328655	274582	0.0666086	-0.445605	0.177074	-0.152617	0.0513905	0.291885	1.28912	1.17647	0.751845
10281		Feature_+_360.8125_23.4	360.812	+	360.812	0	23.4	0.07	12	1323058	1472274	1869399	1526675	1072905	1077714	1431546	1601809	1008463	1883667	1810850	1903454	0.0342213	-0.44539	0.129011	-0.201472	0.00186039	0.717492	2.7304	1.4657	0.889373
668		Feature_-_298.9424_2.6	298.942	-	298.942	0	2.57	0.14	12	458752	469919	551688	412175	321022	345036	332278	439989	498714	567563	482136	471042	0.0421534	-0.444754	0.597924	-0.0849488	0.261779	0.250336	0.582066	1.37517	0.223354
1044	In-source fragment of AMP	Feature_-_215.0319_10.8	215.032	-	215.032	0	10.79	0.31	12	26206	93490	160418	104395	34569	48903	63014	92061	25862	101477	90774	85270	0.14506	-0.444183	0.274256	0.368583	0.000329151	1.67954	3.4826	0.838452	0.561845
4006		Feature_-_87.9713_10.6	87.9713	-	87.9713	0	10.6	0.07	12	695560	794652	903303	762248	543342	518762	622912	839746	913082	895148	1048622	751767	0.135563	-0.444038	0.458592	-0.131795	0.257484	0.324905	0.58925	0.86786	0.338574
10750		Feature_+_823.7979_22.8	823.798	+	823.798	0	22.81	0.34	12	28081	32115	33366	63078	32826	31389	46425	73045	105605	63693	75789	65655	0.228673	-0.443387	0.0771953	-0.674157	0.638467	0.300962	0.194862	0.640786	1.11241
10074		Feature_+_322.8319_23.3	322.832	+	322.832	0	23.33	0.08	12	340437	318591	431208	342901	238237	312002	260384	361284	268920	434219	433744	401089	0.0229262	-0.442767	0.177154	-0.215854	0.0120368	0.582306	1.91949	1.63967	0.751648
10676		Feature_+_717.3283_22.9	717.328	+	717.328	0	22.88	0.42	12	126796	127611	121890	110957	112160	139988	127980	103897	122621	148125	241220	115942	0.318134	-0.442324	0.271495	-0.487272	0.273961	0.4828	0.562311	0.49739	0.566238
1738		Feature_-_166.0169_5.5	166.017	-	166.017	0	5.51	0.09	1	-	-	-	-	-	-	-	-	-	12442870	-	-	0.373901	-0.32139	0.373901	-0.32139	0.373901	0.32139
10388		Feature_+_422.8119_23.5	422.812	+	422.812	0	23.47	0.19	12	500607	500470	573634	560703	349115	385803	492345	454546	400743	586834	622982	600358	0.00843207	-0.441783	0.0786245	-0.147008	0.0150654	0.533664	1.82202	2.07407	1.10444
10079		Feature_+_324.8544_23.4	324.854	+	324.854	0	23.38	0.25	12	207546	171544	202909	164499	142836	127874	149306	195603	146808	252441	208339	181183	0.122004	-0.441312	0.223922	-0.252333	0.177079	0.368693	0.751833	0.913625	0.649903
502		Feature_-_356.9831_10.6	356.983	-	356.983	0	10.62	0.15	12	72190	88243	114425	89041	78131	61640	61922	77248	62483	112110	75341	85019	0.120771	-0.440266	0.669909	0.0984325	0.170302	0.356572	0.768781	0.918037	0.173984
8684		Feature_+_178.8733_24.3	178.873	+	178.873	-1.1	24.04	0.02	12	982977	1123734	1592770	1057512	742106	980889	1102162	930246	1135438	1071581	1944541	1068160	0.294231	-0.43874	0.774067	-0.113982	0.262743	0.513805	0.580469	0.531312	0.111221
217		Feature_-_588.8403_22.9	588.84	-	588.84	0	22.86	0.4	12	118486	118743	175306	141426	90525	102759	106143	142324	49000	234687	124667	116599	0.358806	-0.438419	0.761291	-0.128229	0.16722	0.883387	0.776711	0.445141	0.118449
1737		Feature_-_166.0170_5.2	166.017	-	166.017	0	5.49	0.06	1	-	-	-	-	-	-	-	-	-	12222241	-	-	0.373901	-0.323096	0.373901	-0.323096	0.373901	0.323096
4345		Feature_-_74.9388_10.6	74.9388	-	74.9388	0	10.59	0.12	12	569266	505512	638687	614018	388169	416549	458810	710746	629911	773034	628762	745765	0.140268	-0.437211	0.0975816	-0.288586	0.0930683	0.436082	1.0312	0.853042	1.01063
10603		Feature_+_648.8185_23.2	648.818	+	648.818	0	23.23	0.32	12	85546	85311	163368	115394	75555	77966	105166	143498	111254	154477	133441	153772	0.130734	-0.435377	0.337283	-0.278806	0.0112165	0.697546	1.95014	0.883611	0.472006
98		Feature_-_739.2603_23.1	739.26	-	739.26	-0.3	22.93	0.36	12	123494	122366	146110	183275	111715	105091	105891	125260	110409	181795	150412	122215	0.0993393	-0.434533	0.972977	-0.00850489	0.10986	0.394854	0.959162	1.00288	0.0118976
1739		Feature_-_166.0169_5.8	166.017	-	166.017	0	5.53	0.05	1	-	-	-	-	-	-	-	-	-	11860549	-	-	0.373901	-0.373282	0.373901	-0.373282	0.373901	0.373282
5327		Feature_+_94.0655_0.1	94.0655	+	94.0655	0	0.14	0.05	2	-	-	-	118211	-	-	-	-	3878286	-	-	-	NA	0	0.373901	0.0528761	0.373901	-3.68117
528		Feature_-_344.8775_22.8	344.877	-	344.877	0	22.8	0.45	0	-	-	-	-	-	-	-	-	-	-	-	-	NA	0	NA	0	NA	0
529		Feature_-_344.8760_22.4	344.876	-	344.876	0.3	22.6	0.31	0	-	-	-	-	-	-	-	-	-	-	-	-	NA	0	NA	0	NA	0
530		Feature_-_344.8757_23.4	344.876	-	344.876	0	23.36	0.3	0	-	-	-	-	-	-	-	-	-	-	-	-	NA	0	NA	0	NA	0
531		Feature_-_344.8755_23.1	344.875	-	344.875	0.3	23.05	0.33	0	-	-	-	-	-	-	-	-	-	-	-	-	NA	0	NA	0	NA	0
90		Feature_-_754.0803_22.9	754.08	-	754.08	0	22.89	0.32	12	376323	242321	272843	315588	216879	232322	204302	292118	275889	307227	354469	321190	0.0451489	-0.431616	0.117131	-0.242606	0.478761	0.177517	0.319881	1.34535	0.931327
10357		Feature_+_398.7700_23.7	398.77	+	398.77	-4.5	23.44	0.11	12	288911	262733	316622	303603	193015	205573	254476	281884	226853	361729	338186	300306	0.0395556	-0.430958	0.180986	-0.179902	0.0433403	0.496911	1.36311	1.40279	0.742354
10580		Feature_+_625.7826_22.9	625.783	+	625.783	0	22.92	0.47	12	87422	62430	99449	102903	108314	85234	72853	74883	83791	115984	124786	72931	0.177682	-0.429246	0.472957	-0.244585	0.555951	0.166402	0.254964	0.750356	0.325178
10368		Feature_+_404.7758_23.3	404.776	+	404.776	0	23.34	0.11	12	103900	82133	191259	134721	67694	86527	78171	113187	92446	119321	117961	136775	0.0579711	-0.42877	0.741349	0.125711	0.040502	0.502502	1.39252	1.23679	0.129977
10328		Feature_+_382.7939_23.4	382.794	+	382.794	0	23.37	0.05	12	261824	241141	443138	313190	203858	217318	269937	287223	226004	317873	336405	387491	0.0394869	-0.427739	0.825277	-0.0626915	0.0121247	0.590846	1.91633	1.40355	0.0834003
3279		Feature_-_96.9684_14.4	96.9684	-	96.9684	0	14.24	0.28	6	1059116	-	1130163	-	-	-	-	-	983108	1184266	1268988	1077330	0.00556159	-0.426782	0.0996475	-0.293266	0.0565767	0.275069	1.24736	2.2548	1.00153
7921		Feature_+_160.0964_5.8	160.096	+	160.096	0	5.96	0.19	5	-	1234572	-	-	422505	241507	-	-	858102	449138	-	-	0.491651	-0.426282	0.509882	0.976536	0.374924	-0.848916	0.426057	0.308343	0.29253
10391	Sodium Cluster Adduct	Feature_+_424.8624_22.5	424.862	+	424.862	0.9	22.74	0.19	12	1500839	1310804	1559870	1579199	1230356	1289309	1191746	1356945	1251218	1696222	1703495	1749287	0.000999315	-0.423939	0.0570973	-0.210529	0.0117311	0.370651	1.93066	3.0003	1.24338
818		Feature_-_248.9782_10.6	248.978	-	248.978	0	10.6	0.21	12	136557	141544	215825	168600	115638	108748	118606	164669	127746	188983	177506	159144	0.0822578	-0.423118	0.996407	0.000921918	0.0101598	0.46828	1.99312	1.08482	0.00156315
6634		Feature_+_128.9798_22.5	128.98	+	128.98	0	22.74	0.23	12	993554	1166367	927057	937623	958762	954163	552031	891492	983143	1178785	928471	1104269	0.135283	-0.421616	0.606264	-0.0834423	0.286661	0.129672	0.542631	0.868757	0.217338
10791		Feature_+_917.7603_22.9	917.76	+	917.76	0	22.92	0.44	12	59767	69571	100528	102714	28771	85716	66287	69172	79729	92791	105099	98132	0.0237569	-0.420516	0.530482	-0.117792	0.0491613	0.814952	1.30838	1.62421	0.275329
10773		Feature_+_873.0744_10.6	873.074	+	873.074	0	10.56	0.16	12	73472	66414	75781	74418	54287	65986	56979	80345	58026	86962	81781	103143	0.0711199	-0.419321	0.0595745	-0.327882	0.0300737	0.549368	1.52181	1.14801	1.22494
9895		Feature_+_266.8650_23.3	266.865	+	266.865	0	23.31	0.27	12	2794464	2565823	4863189	3646639	2349138	2778570	2745656	3392470	2455801	4132895	3939828	3846114	0.0115527	-0.418662	0.695951	-0.105852	0.000815914	0.649285	3.08836	1.93732	0.157421
9992		Feature_+_284.8365_23.3	284.837	+	284.837	0	23.34	0.11	12	248189	248018	408316	284177	203959	217499	240643	341356	244645	369404	353985	345126	0.0812655	-0.418441	0.433512	-0.18409	0.00144997	0.616805	2.83864	1.09009	0.362999
771		Feature_-_260.8794_23.3	260.879	-	260.879	0	23.33	0.07	12	3172564	2782643	4645882	3621844	2333572	2772346	3037807	3167659	2890252	4381072	3568953	4043635	0.0186733	-0.417836	0.621165	-0.118177	0.0245142	0.514431	1.61058	1.72878	0.206793
382		Feature_-_426.8077_23.3	426.808	-	426.808	0	23.33	0.07	12	142415	128112	247262	164408	104693	120485	155915	136843	126676	229428	143792	178769	0.160497	-0.417649	0.929393	-0.0322626	0.0939888	0.562435	1.02692	0.794532	0.0318004
9821		Feature_+_244.8830_23.4	244.883	+	244.883	0	23.38	0.07	12	605599	613808	885455	894787	457804	694606	505996	824793	438120	963544	994920	746858	0.134401	-0.417597	0.438516	-0.176347	0.0130601	0.849374	1.88405	0.871599	0.358015
2238		Feature_-_144.9743_23.6	144.974	-	144.974	0	23.37	0.02	1	-	-	-	-	-	-	-	-	-	-	5839896	-	0.373901	-0.0203454	0.373901	-0.0203454	0.373901	0.0203454
10507	Beta-nicotinamide Ribotide In-Source Fragment	Feature_+_551.0605_10.6	551.061	+	551.061	0	10.56	0.13	12	96018	116645	123988	127811	105719	108126	107698	110233	116566	132514	150315	152441	0.00462749	-0.416786	0.0351874	-0.240465	0.0108395	0.45151	1.96499	2.33465	1.45361
10619		Feature_+_664.8450_22.9	664.845	+	664.845	0	22.85	0.36	12	125354	102872	85634	87600	79329	79894	94919	73510	98732	85283	159602	86524	0.336415	-0.416395	0.504461	-0.263391	0.755315	0.12732	0.121872	0.473125	0.297172
7922		Feature_+_160.0964_6.0	160.096	+	160.096	0	6.02	0.23	5	-	1311825	-	-	422505	241507	-	-	863761	449138	-	-	0.472253	-0.413557	0.494518	1.0254	0.373635	-0.827338	0.427553	0.325825	0.305818
10755		Feature_+_832.3088_22.8	832.309	+	832.309	0	22.84	0.26	12	103769	103739	120039	115412	115260	116467	79692	100305	137178	135595	121474	137514	0.0500305	-0.412472	0.0578711	-0.218235	0.310572	0.147613	0.507837	1.30077	1.23754
7274		Feature_+_142.9478_17.1	142.948	+	142.948	0	16.91	0.3	6	305238	-	383544	-	-	-	-	-	326472	384537	449208	303531	0.0894016	-0.411444	0.315695	-0.254126	0.16863	0.311001	0.773065	1.04865	0.500732
510		Feature_-_350.8956_23.2	350.896	-	350.896	0	23.22	0.43	12	105402	98299	91219	117284	82394	75109	85286	95381	83356	126699	99567	113864	0.0452398	-0.411205	0.371346	-0.148778	0.101589	0.326984	0.993154	1.34448	0.430221
1995		Feature_-_156.9625_7.1	156.963	-	156.963	0	7.13	0.17	12	34379	64907	329088	297211	62433	77916	99931	150541	71354	129006	147156	160517	0.197157	-0.411172	0.368373	0.662543	0.00341374	1.37669	2.46677	0.705188	0.433712
557		Feature_-_336.8579_14.9	336.858	-	336.858	0	14.88	0.15	0	-	-	-	-	-	-	-	-	-	-	-	-	NA	0	NA	0	NA	0
182		Feature_-_632.8083_22.7	632.808	-	632.808	0	22.69	0.43	11	48056	57029	44789	69229	12119	49549	57680	41013	-	42218	52144	102728	0.447316	-0.4109	0.686934	-0.204462	0.133863	1.46248	0.873341	0.349386	0.163085
10620		Feature_+_665.8130_22.9	665.813	+	665.813	0	22.88	0.38	12	168546	166706	120777	118379	108383	104490	143458	132077	118798	193920	170215	140821	0.096257	-0.410063	0.207315	-0.315168	0.20526	0.351652	0.687696	1.01657	0.683369
10777		Feature_+_875.7723_22.8	875.772	+	875.772	0	22.85	0.29	12	69777	92907	131655	112591	70226	59574	94939	119305	83008	136183	132603	94561	0.244005	-0.408131	0.642022	-0.107945	0.0288386	0.704233	1.54003	0.612601	0.19245
150		Feature_-_666.2798_22.8	666.28	-	666.28	0	22.79	0.3	12	280409	182883	228031	211862	244458	161108	161362	254002	244104	240884	271333	252327	0.123155	-0.407349	0.0411699	-0.295886	0.926183	-0.00832966	0.0333032	0.909549	1.38542
10590		Feature_+_634.8139_22.9	634.814	+	634.814	0	22.88	0.39	12	95108	108338	122847	94722	104277	86072	94387	120213	89141	152417	132969	113061	0.100517	-0.406197	0.158409	-0.289927	0.0396603	0.465687	1.40164	0.997759	0.80022
275		Feature_-_522.7521_23.4	522.752	-	522.752	0	23.42	0.1	12	84488	80675	122989	81793	70217	84846	78004	79508	71207	122264	96678	102121	0.0311565	-0.405717	0.498125	-0.169583	0.0247063	0.507096	1.60719	1.50645	0.302662
3912		Feature_-_89.9684_10.6	89.9684	-	89.9684	0	10.55	0.08	12	401945	579981	674028	452757	424578	344475	455672	519859	526477	586108	614303	547675	0.0596526	-0.405232	0.847071	-0.0345109	0.037279	0.369614	1.42854	1.22437	0.07208
2874		Feature_-_112.9844_10.6	112.984	-	112.984	0	10.64	0.35	12	97867	113035	137851	103023	93247	74093	87801	102701	85526	122124	108827	118883	0.0363891	-0.402885	0.9085	0.0167079	0.0105619	0.338661	1.97626	1.43903	0.041675
10698		Feature_+_747.8276_22.8	747.828	+	747.828	0	22.81	0.27	12	498201	412643	581680	442947	359914	387191	383791	482247	459578	600707	512021	544103	0.0313684	-0.402776	0.276532	-0.205095	0.0809171	0.330412	1.09196	1.50351	0.558254
9903		Feature_+_268.8633_23.3	268.863	+	268.863	0	23.35	0.07	12	150668	117199	208474	202292	116225	140348	149997	220100	136043	222625	251610	200562	0.13343	-0.402698	0.211622	-0.354011	0.00707602	0.743903	2.15021	0.874745	0.674439
568		Feature_-_334.8957_22.0	334.896	-	334.896	-0.3	22.13	0.23	0	-	-	-	-	-	-	-	-	-	-	-	-	NA	0	NA	0	NA	0
652		Feature_-_301.9814_10.6	301.981	-	301.981	0	10.57	0.14	12	144033	138058	188254	165332	121509	107702	139441	180079	140319	212038	195679	156538	0.161597	-0.401361	0.331961	-0.198733	0.0418517	0.475362	1.37829	0.791566	0.478913
8953		Feature_+_202.8915_23.3	202.892	+	202.892	0	23.31	0.07	12	904394	671769	1258168	1098727	728780	767912	805748	829739	559141	923798	1188212	1061780	0.0306866	-0.40113	0.812521	-0.0675251	0.0596902	0.533752	1.2241	1.51305	0.0901651
6190		Feature_+_116.0821_5.0	116.082	+	116.082	0	5.01	0.43	3	120042	31278	-	-	-	-	-	-	-	-	-	49040	0.373901	-0.400949	0.514073	-0.285108	0.508976	-0.779735	0.293303	0.427243	0.288975
10348		Feature_+_390.8641_23.3	390.864	+	390.864	0	23.28	0.38	12	205248	193947	317585	261838	143158	221919	198512	272058	166051	320455	312841	280614	0.0413542	-0.400261	0.282713	-0.240893	0.00367218	0.829002	2.43508	1.38348	0.548654
7740		Feature_+_151.0962_3.7	151.096	+	151.096	0	3.74	0.1	1	-	-	-	-	9503410	-	-	-	-	-	-	-	NA	0	NA	0	0.373901	-0.307657
1341		Feature_-_178.9332_23.3	178.933	-	178.933	0	23.3	0.4	12	1029354	911953	1556329	1200479	633238	922008	1041623	966151	914904	1367282	1256737	1242506	0.00405852	-0.400244	0.74672	-0.0757446	0.0257803	0.585067	1.58871	2.39163	0.126842
10782		Feature_+_885.2908_22.9	885.291	+	885.291	0	22.88	0.42	12	95407	104839	119354	113422	81185	98813	111977	112163	111967	161280	142591	122165	0.0472031	-0.399651	0.0708383	-0.335596	0.0332972	0.562109	1.47759	1.32603	1.14973
3195		Feature_-_98.9656_12.3	98.9656	-	98.9656	0	12.05	0.26	12	233714	300663	311633	272697	154303	191391	160026	277218	174078	276405	240707	312080	0.175296	-0.399484	0.475395	0.0939598	0.047648	0.560892	1.32196	0.756229	0.322945
136		Feature_-_685.7745_22.8	685.774	-	685.774	0	22.79	0.25	12	786091	746986	966619	803134	736648	709205	660742	862790	814881	873327	980669	1089721	0.0531787	-0.398826	0.192023	-0.226083	0.0384993	0.332599	1.41455	1.27426	0.716647
10412		Feature_+_444.7942_23.4	444.794	+	444.794	0	23.37	0.11	12	344350	304218	524247	418076	335893	248955	313851	362483	308892	398232	418951	401206	0.043454	-0.396999	0.89028	0.0329555	0.00362066	0.300735	2.44121	1.36197	0.0504733
10055		Feature_+_314.8879_23.3	314.888	+	314.888	0	23.26	0.28	12	58489	69591	131289	70213	51275	50755	70997	69210	61497	78548	84898	87801	0.0458747	-0.395821	0.764678	0.109681	0.00283876	0.55291	2.54687	1.33843	0.116521
10047		Feature_+_306.8834_23.3	306.883	+	306.883	0	23.33	0.3	12	617965	440275	649478	541013	483642	443428	479899	603815	444631	706923	608495	693298	0.0491802	-0.395439	0.136693	-0.300724	0.0644622	0.377511	1.19069	1.30821	0.864255
385		Feature_-_421.3793_22.7	421.379	-	421.379	0	22.69	0.22	12	106015	107031	53392	50144	38884	50732	48609	91366	109196	54752	54068	141901	0.56937	-0.394725	0.717864	-0.251803	0.977266	-0.0192851	0.00998709	0.244606	0.143958
9850	Potassium Cluster Adduct	Feature_+_250.8910_23.3	250.891	+	250.891	0	23.26	0.48	12	4674036	4741735	7328252	4810630	3478920	4294485	4730128	5325976	4621226	6338815	6295020	6203676	0.00771141	-0.392498	0.486518	-0.158241	0.00671068	0.560377	2.17323	2.11287	0.312901
8946		Feature_+_201.1354_2.7	201.135	+	201.135	0	2.74	0.24	6	-	255907	-	-	40346	16623	-	-	133271	29576	-	12706	0.494477	-0.392287	0.406163	2.35681	0.301389	-1.76269	0.520873	0.305854	0.391299
584		Feature_-_330.8406_14.9	330.841	-	330.841	0	14.89	0.12	0	-	-	-	-	-	-	-	-	-	-	-	-	1	0	1	0	1	0
156		Feature_-_663.8018_22.8	663.802	-	663.802	0	22.76	0.48	12	151159	158912	157367	167146	156262	156114	144235	162353	140272	236202	202988	167754	0.0785572	-0.39148	0.10854	-0.328271	0.0592465	0.439054	1.22734	1.10481	0.964409
586		Feature_-_328.8787_22.0	328.879	-	328.879	0	22.01	0.48	0	-	-	-	-	-	-	-	-	-	-	-	-	NA	0	NA	0	NA	0
587		Feature_-_328.8781_22.5	328.878	-	328.878	0	22.53	0.39	0	-	-	-	-	-	-	-	-	-	-	-	-	NA	0	NA	0	NA	0
588		Feature_-_328.8780_21.7	328.878	-	328.878	0	21.66	0.23	0	-	-	-	-	-	-	-	-	-	-	-	-	NA	0	NA	0	NA	0
390		Feature_-_420.7997_23.7	420.8	-	420.8	-1	23.46	0.18	12	736223	708153	812330	632180	509044	566301	638323	658564	678506	837146	906584	698631	0.0453987	-0.390503	0.295937	-0.182154	0.132072	0.344338	0.879189	1.34296	0.5288
590		Feature_-_327.1891_2.6	327.189	-	327.189	0	2.59	0.12	0	-	-	-	-	-	-	-	-	-	-	-	-	NA	0	NA	0	NA	0
591		Feature_-_327.1794_2.6	327.179	-	327.179	0	2.59	0.08	0	-	-	-	-	-	-	-	-	-	-	-	-	NA	0	NA	0	NA	0
451		Feature_-_382.8177_23.3	382.818	-	382.818	0	23.33	0.06	12	385084	256818	483387	364576	241591	274358	321718	368699	280903	450911	355217	457313	0.0805969	-0.389094	0.510458	-0.193598	0.0932633	0.477265	1.03029	1.09368	0.29204
143		Feature_-_683.4353_22.9	683.435	-	683.435	0	22.9	0.38	12	260804	270289	217960	363013	261994	350524	225490	276878	254055	501267	294500	320358	0.304054	-0.388064	0.31902	-0.390823	0.157303	0.522785	0.803263	0.51705	0.496182
594		Feature_-_326.1869_2.8	326.187	-	326.187	-0.3	2.59	0.04	0	-	-	-	-	-	-	-	-	-	-	-	-	NA	0	NA	0	NA	0
595		Feature_-_326.1868_2.6	326.187	-	326.187	0	2.57	0.06	0	-	-	-	-	-	-	-	-	-	-	-	-	1	0	1	0	1	0
2454		Feature_-_133.0131_13.1	133.013	-	133.013	0	13.13	0.13	12	202964	201991	262146	178735	187859	182605	177626	253712	193494	248667	337982	216704	0.223147	-0.387929	0.290774	-0.321503	0.116494	0.459283	0.933696	0.651409	0.536444
7743		Feature_+_151.0963_3.5	151.096	+	151.096	-0.7	3.7	0.06	1	-	-	-	-	9398489	-	-	-	-	-	-	-	NA	0	NA	0	0.373901	-0.301746
598		Feature_-_325.2877_2.6	325.288	-	325.288	0	2.57	0.11	0	-	-	-	-	-	-	-	-	-	-	-	-	NA	0	NA	0	NA	0
599		Feature_-_325.1839_3.1	325.184	-	325.184	-0.3	2.86	0.03	0	-	-	-	-	-	-	-	-	-	-	-	-	NA	0	NA	0	NA	0
600		Feature_-_325.1837_2.8	325.184	-	325.184	-0.6	2.59	0.04	0	-	-	-	-	-	-	-	-	-	-	-	-	NA	0	NA	0	NA	0
601		Feature_-_325.1836_2.6	325.184	-	325.184	0	2.57	0.05	0	-	-	-	-	-	-	-	-	-	-	-	-	NA	0	NA	0	NA	0
602		Feature_-_325.0777_2.6	325.078	-	325.078	0	2.59	0.1	0	-	-	-	-	-	-	-	-	-	-	-	-	NA	0	NA	0	NA	0
603		Feature_-_323.1679_2.6	323.168	-	323.168	0	2.62	0.09	0	-	-	-	-	-	-	-	-	-	-	-	-	NA	0	NA	0	NA	0
1744		Feature_-_165.9726_22.6	165.973	-	165.973	-0.6	22.79	0.05	12	1090014	1176323	1180897	1016446	676298	937404	672873	973228	714171	1237052	889314	1253046	0.155498	-0.387443	0.988985	-0.0024551	0.166722	0.446151	0.778008	0.808276	0.00481033
10810		Feature_+_968.7733_22.6	968.773	+	968.773	2.4	22.79	0.07	12	340895	433012	538871	350770	335698	277122	456510	371093	408713	504806	443508	496511	0.109447	-0.387207	0.519454	-0.12746	0.0168595	0.412793	1.77315	0.960797	0.284453
532		Feature_-_344.8230_23.4	344.823	-	344.823	0	23.39	0.07	12	144242	152402	234174	165840	124275	137348	152050	200832	166381	231190	190136	218642	0.0928545	-0.384541	0.357344	-0.212245	0.0164398	0.557323	1.7841	1.0322	0.446914
10575		Feature_+_622.7262_23.4	622.726	+	622.726	0	23.41	0.11	12	424923	416987	449720	437118	284660	333164	352753	410370	353657	494951	461578	474306	0.0113534	-0.384232	0.0359011	-0.134107	0.0422878	0.42839	1.37378	1.94487	1.44489
10431		Feature_+_466.8554_22.8	466.855	+	466.855	0	22.75	0.49	12	71958	69529	100085	66004	58372	48144	79975	32927	55236	70977	88785	50341	0.409354	-0.383624	0.612553	0.165353	0.54045	0.179164	0.267245	0.387901	0.212856
10636		Feature_+_690.7307_23.3	690.731	+	690.731	0	23.34	0.11	12	58478	62242	111277	82556	51395	58055	59211	91675	61877	98873	75775	97926	0.18744	-0.383552	0.74988	-0.0900815	0.0145906	0.666338	1.83593	0.727139	0.125008
10340		Feature_+_388.3409_2.8	388.341	+	388.341	0.3	2.58	0.24	6	-	-	-	8296444	6204956	-	-	628698	393985	749092	-	287986	0.731164	-0.38314	0.417147	2.86962	0.404293	-2.52237	0.393303	0.135985	0.379711
10390		Feature_+_424.8120_23.4	424.812	+	424.812	0	23.44	0.21	12	103113	124175	136945	136081	96010	107519	114466	149529	103219	191919	131496	161073	0.158509	-0.383044	0.179849	-0.286592	0.02609	0.68028	1.58353	0.799945	0.745091
121		Feature_-_717.4412_22.9	717.441	-	717.441	0	22.86	0.34	12	87162	41321	32073	42814	44682	28674	42735	30962	110054	58310	34317	40772	0.285075	-0.381941	0.50922	-0.199038	0.151687	-0.858651	0.819051	0.545041	0.293094
10804		Feature_+_947.7949_22.8	947.795	+	947.795	0	22.85	0.28	12	94796	63663	84969	75461	70994	81124	75674	72824	79770	110262	100077	88763	0.025524	-0.381377	0.0460155	-0.41654	0.127992	0.284562	0.892817	1.59305	1.3371
447		Feature_-_384.8133_23.3	384.813	-	384.813	0	23.33	0.1	12	65424	45885	115173	62109	59410	52493	69091	81499	55715	84581	74710	105127	0.171337	-0.380751	0.578344	-0.244697	0.0409167	0.55043	1.3881	0.766149	0.237814
5658		Feature_+_100.1123_13.6	100.112	+	100.112	0	13.81	0.26	12	1012760	1115925	1461571	849746	508128	465318	658587	829418	546540	982989	816532	743417	0.196167	-0.380566	0.197207	0.430552	0.421145	0.298659	0.375568	0.707373	0.705078
616		Feature_-_314.8765_14.9	314.877	-	314.877	0	14.93	0.11	0	-	-	-	-	-	-	-	-	-	-	-	-	NA	0	NA	0	NA	0
617		Feature_-_314.1668_2.6	314.167	-	314.167	0	2.62	0.14	0	-	-	-	-	-	-	-	-	-	-	-	-	NA	0	NA	0	NA	0
7511		Feature_+_146.0809_6.2	146.081	+	146.081	0	6.24	0.18	6	147521	116767	108761	-	-	-	-	100406	127977	190171	-	-	0.380863	-0.379528	0.529651	-0.2582	0.898787	0.0515552	0.0463432	0.419231	0.27601
500		Feature_-_357.9076_23.1	357.908	-	357.908	-3.1	22.83	0.25	12	139160	182837	167994	125935	143023	114633	134118	133617	180120	192990	153082	151056	0.0642527	-0.378656	0.771449	-0.060336	0.572135	0.104779	0.242502	1.19211	0.112693
620		Feature_-_313.2170_3.7	313.217	-	313.217	0	3.69	0.2	0	-	-	-	-	-	-	-	-	-	-	-	-	NA	0	NA	0	NA	0
621		Feature_-_313.1733_2.6	313.173	-	313.173	0	2.64	0.1	0	-	-	-	-	-	-	-	-	-	-	-	-	NA	0	NA	0	NA	0
622		Feature_-_313.1637_2.6	313.164	-	313.164	0	2.59	0.07	0	-	-	-	-	-	-	-	-	-	-	-	-	NA	0	NA	0	NA	0
623		Feature_-_313.0773_2.6	313.077	-	313.077	0	2.58	0.15	0	-	-	-	-	-	-	-	-	-	-	-	-	NA	0	NA	0	NA	0
10308		Feature_+_374.8903_23.2	374.89	+	374.89	0	23.23	0.45	12	392740	421455	483316	391279	286965	328983	373453	399992	321972	498814	434465	499316	0.0211439	-0.377946	0.258745	-0.144509	0.0191641	0.516213	1.71751	1.67481	0.587129
489		Feature_-_363.8585_23.3	363.858	-	363.858	0	23.28	0.36	12	142047	198935	246962	186516	95670	118086	155633	237813	119961	192958	249832	221918	0.260406	-0.377896	0.685256	-0.0718537	0.00846054	0.894059	2.0726	0.58435	0.164147
383		Feature_-_424.8266_23.3	424.827	-	424.827	0	23.27	0.44	12	89748	87954	169910	95667	66343	79921	67930	98352	83075	155637	92275	71864	0.41076	-0.377213	0.772155	0.144775	0.362464	0.419049	0.440735	0.386412	0.112296
10596		Feature_+_642.8143_23.3	642.814	+	642.814	0	23.28	0.31	12	84087	74647	130823	92477	40309	75081	78220	75904	62636	115111	97166	85410	0.0583183	-0.377158	0.996522	0.0012595	0.0735814	0.670511	1.13323	1.2342	0.00151316
236		Feature_-_564.7178_23.4	564.718	-	564.718	0	23.4	0.08	12	123358	84799	138673	91501	69394	84339	78641	158293	80447	140939	158495	117680	0.321262	-0.376642	0.174805	-0.405214	0.0770357	0.61049	1.11331	0.493141	0.757447
10682		Feature_+_720.7741_22.9	720.774	+	720.774	0	22.95	0.45	12	188730	180290	203063	217188	181569	169956	153133	181840	178145	211784	245842	197578	0.0390155	-0.375864	0.366396	-0.125681	0.0721228	0.2566	1.14193	1.40876	0.436049
38		Feature_-_844.7223_23.0	844.722	-	844.722	-2.7	22.9	0.38	12	255147	273949	260249	292499	268562	183498	217585	278653	226915	315706	291291	274582	0.0904714	-0.375115	0.294094	-0.0927312	0.0633589	0.231999	1.19819	1.04349	0.531514
631		Feature_-_312.1715_2.9	312.171	-	312.171	-0.3	2.62	0.04	0	-	-	-	-	-	-	-	-	-	-	-	-	NA	0	NA	0	NA	0
632		Feature_-_312.1713_2.6	312.171	-	312.171	0	2.59	0.06	0	-	-	-	-	-	-	-	-	-	-	-	-	NA	0	NA	0	NA	0
377		Feature_-_432.3680_23.0	432.368	-	432.368	0	22.99	0.47	12	114688	169708	125449	137976	99546	122714	108435	155102	145699	150541	154522	195712	0.12861	-0.374624	0.312882	-0.209352	0.0769727	0.476434	1.11366	0.890725	0.50462
634		Feature_-_311.8918_22.8	311.892	-	311.892	0	22.77	0.36	0	-	-	-	-	-	-	-	-	-	-	-	-	NA	0	NA	0	NA	0
240		Feature_-_560.3143_23.1	560.314	-	560.314	3.7	22.9	0.28	12	168456	207829	245639	202720	207301	185726	152171	190288	152870	251397	206798	226329	0.0417654	-0.374058	0.640107	-0.0609919	0.066036	0.372851	1.18022	1.37918	0.193747
636		Feature_-_311.2656_2.6	311.266	-	311.266	0	2.57	0.08	0	-	-	-	-	-	-	-	-	-	-	-	-	NA	0	NA	0	NA	0
637		Feature_-_311.1683_2.9	311.168	-	311.168	-0.6	2.62	0.05	0	-	-	-	-	-	-	-	-	-	-	-	-	NA	0	NA	0	NA	0
638		Feature_-_311.1681_2.6	311.168	-	311.168	0	2.59	0.06	0	-	-	-	-	-	-	-	-	-	-	-	-	NA	0	NA	0	NA	0
639		Feature_-_311.1678_3.1	311.168	-	311.168	1.3	2.88	0.02	0	-	-	-	-	-	-	-	-	-	-	-	-	NA	0	NA	0	NA	0
640		Feature_-_311.0690_2.6	311.069	-	311.069	0	2.59	0.09	0	-	-	-	-	-	-	-	-	-	-	-	-	1	0	1	0	1	0
10535		Feature_+_580.8094_23.2	580.809	+	580.809	0	23.24	0.29	12	81668	91043	131574	116109	53677	76332	105630	109095	71613	151980	109747	115392	0.163467	-0.373718	0.510565	-0.154901	0.0218823	0.865682	1.65991	0.786569	0.291949
642		Feature_-_309.1526_2.6	309.153	-	309.153	0	2.57	0.11	0	-	-	-	-	-	-	-	-	-	-	-	-	NA	0	NA	0	NA	0
10600		Feature_+_644.7057_23.4	644.706	+	644.706	0	23.44	0.09	12	110528	106339	140933	124325	80424	101286	85344	126655	107475	137981	145791	122104	0.0905937	-0.373563	0.401285	-0.1273	0.0389275	0.443661	1.40974	1.0429	0.396548
644		Feature_-_306.1212_2.9	306.121	-	306.121	0	2.93	0.09	0	-	-	-	-	-	-	-	-	-	-	-	-	NA	0	NA	0	NA	0
645		Feature_-_305.1180_2.9	305.118	-	305.118	0	2.91	0.08	0	-	-	-	-	-	-	-	-	-	-	-	-	NA	0	NA	0	NA	0
646		Feature_-_305.1174_3.2	305.117	-	305.117	1.6	2.97	0.06	0	-	-	-	-	-	-	-	-	-	-	-	-	NA	0	NA	0	NA	0
471		Feature_-_368.8412_23.3	368.841	-	368.841	0	23.3	0.09	12	85424	73383	111844	70570	58375	51238	56964	84470	63936	74770	87651	86856	0.16354	-0.371603	0.883749	0.0372496	0.208353	0.263005	0.6812	0.786377	0.053671
10422		Feature_+_458.8721_23.3	458.872	+	458.872	0	23.26	0.35	12	230678	205181	303932	189242	153411	200497	163787	206624	162904	293228	236316	209088	0.118133	-0.371597	0.773512	-0.0808952	0.139725	0.433333	0.854727	0.927627	0.111533
22		Feature_-_895.3705_23.0	895.37	-	895.37	-9.4	22.79	0.23	12	119227	109329	132934	139716	81005	104371	119075	96240	39700	156102	145631	111811	0.104383	-0.371385	0.552147	-0.114548	0.0949456	0.785415	1.02253	0.981372	0.257946
10610		Feature_+_658.7717_22.6	658.772	+	658.772	-0.5	22.81	0.26	12	405450	368590	397864	476557	366608	290533	290610	352833	352113	373393	409980	424514	0.0238288	-0.371028	0.759036	0.0413536	0.273791	0.103624	0.562582	1.6229	0.119738
8657		Feature_+_176.8750_24.3	176.875	+	176.875	0	24.04	0.04	12	4921668	5216486	7239760	5043244	3770185	4801576	5323702	4379561	5273842	5135221	8790345	4830374	0.337362	-0.370813	0.787698	-0.100035	0.302654	0.42546	0.519054	0.471903	0.10364
10797		Feature_+_932.6993_22.9	932.699	+	932.699	0	22.88	0.36	12	68809	63343	38887	67655	58845	73390	63907	77495	61059	104661	88034	84968	0.0458328	-0.370395	0.0295999	-0.708776	0.0121981	0.557141	1.91371	1.33882	1.52871
1113		Feature_-_204.8596_23.3	204.86	-	204.86	0	23.27	0.09	12	126243	116880	157734	138362	108014	105895	134985	114753	124546	145164	157723	155943	0.0220432	-0.367571	0.28634	-0.151902	0.00894726	0.354768	2.04831	1.65673	0.543119
7275		Feature_+_142.9478_17.5	142.948	+	142.948	0	17.5	0.38	5	300881	-	381695	-	-	-	-	-	324996	371210	424298	-	0.135116	-0.366237	0.456738	-0.196054	0.277861	0.248267	0.556173	0.869293	0.340332
713		Feature_-_288.8949_23.3	288.895	-	288.895	0	23.26	0.23	12	1045147	1156230	1548575	1277431	882876	1091121	1065528	1210488	908122	1618330	1393983	1327384	0.0303656	-0.366072	0.459084	-0.124016	0.00780847	0.613663	2.10743	1.51762	0.338108
1159		Feature_-_195.9751_10.6	195.975	-	195.975	0	10.64	0.12	12	488137	587420	763645	678747	413511	381516	526967	587918	546171	739446	646396	541553	0.161458	-0.365155	0.678607	0.0746938	0.0809995	0.412771	1.09152	0.791941	0.168382
1160		Feature_-_195.9749_10.4	195.975	-	195.975	1.5	10.59	0.08	12	488137	587420	661955	678747	413511	381516	526967	587918	546171	739446	646396	541553	0.161458	-0.365155	0.997146	0.000544072	0.0809995	0.412771	1.09152	0.791941	0.00124132
7741		Feature_+_151.0962_4.0	151.096	+	151.096	0	3.78	0.04	1	-	-	-	-	8378056	-	-	-	-	-	-	-	NA	0	NA	0	0.373901	-0.268744
10681		Feature_+_720.7717_22.7	720.772	+	720.772	1.7	22.91	0.21	12	188730	180290	203063	217188	176826	169956	150626	163188	162874	211784	213691	197578	0.00365154	-0.365034	0.562226	-0.0530921	0.025117	0.237643	1.60003	2.43752	0.250089
10736	Potassium Cluster Adduct	Feature_+_800.8102_23.1	800.81	+	800.81	-0.5	22.95	0.29	12	1256080	1283056	1249757	1073038	1104810	1092375	1003255	1063922	1147104	1361663	1408353	1296811	0.00191443	-0.364184	0.102252	-0.173564	0.0283449	0.213257	1.54752	2.71796	0.990328
6297		Feature_+_118.0863_8.2	118.086	+	118.086	0	8.16	0.13	4	-	667848	-	-	178625	-	-	-	373178	242852	-	-	0.373901	-0.363823	0.482014	0.882361	0.513699	-0.437301	0.289292	0.427243	0.31694
165		Feature_-_652.8137_23.1	652.814	-	652.814	-4.3	22.84	0.26	12	183166	227688	157453	146921	138053	154440	148494	156939	132523	203772	208299	179451	0.00918425	-0.363196	0.501912	-0.152837	0.0667669	0.38256	1.17544	2.03696	0.299373
10018		Feature_+_298.8127_23.5	298.813	+	298.813	0	23.47	0.12	12	2918384	3051696	4148013	3605072	2040584	2525427	3132046	3734691	2389327	3994339	4312172	3762832	0.0806188	-0.361818	0.299924	-0.159677	0.00637501	0.715866	2.19552	1.09356	0.522988
10325		Feature_+_381.8771_22.9	381.877	+	381.877	0	22.95	0.42	12	118817	83828	100541	96735	104092	92358	75779	81787	105119	104046	123664	93428	0.0783993	-0.361704	0.260831	-0.192089	0.830414	-0.0306256	0.0807052	1.10569	0.583641
10331		Feature_+_384.7917_23.4	384.792	+	384.792	0	23.38	0.1	12	72190	103280	103672	105124	60758	55383	72137	94486	62700	100894	88939	95414	0.149655	-0.361613	0.0629768	0.129686	0.00377785	0.543951	2.42276	0.824908	1.20082
9314		Feature_+_212.1486_3.3	212.149	+	212.149	0	3.28	0.05	2	-	-	-	-	9714237	-	-	-	-	-	5273272	-	0.373901	-0.0845056	0.373901	-0.0845056	0.450085	-0.392497
667		Feature_-_299.1480_2.6	299.148	-	299.148	0	2.62	0.12	0	-	-	-	-	-	-	-	-	-	-	-	-	NA	0	NA	0	NA	0
9885		Feature_+_260.8570_23.4	260.857	+	260.857	0	23.38	0.07	12	2817287	2594072	3277115	2787074	2323878	2282395	2693974	2904113	2266943	3450430	3428157	3241222	0.0184217	-0.360826	0.0849562	-0.225033	0.00842309	0.450005	2.07453	1.73467	1.0708
99		Feature_-_739.2553_22.8	739.255	-	739.255	0	22.79	0.29	12	123494	153851	146110	183275	111715	137274	105891	125260	201059	181795	168802	122215	0.161136	-0.359896	0.878543	0.0314613	0.733454	0.116052	0.134627	0.792806	0.0562372
8315		Feature_+_168.1227_3.7	168.123	+	168.123	0	3.7	0.08	1	-	-	-	-	7277962	-	-	-	-	-	-	-	NA	0	NA	0	0.373901	-0.329602
341		Feature_-_458.7538_23.5	458.754	-	458.754	0	23.49	0.13	12	208834	203011	314891	249698	222536	201574	221874	265604	211111	312385	329699	241465	0.120475	-0.358697	0.411599	-0.202955	0.0423497	0.459656	1.37315	0.919104	0.385526
672		Feature_-_298.1557_2.6	298.156	-	298.156	0	2.59	0.09	0	-	-	-	-	-	-	-	-	-	-	-	-	1	0	1	0	1	0
673		Feature_-_298.1451_2.8	298.145	-	298.145	0	2.79	0.12	0	-	-	-	-	-	-	-	-	-	-	-	-	NA	0	NA	0	NA	0
674		Feature_-_297.2429_2.6	297.243	-	297.243	0	2.62	0.1	0	-	-	-	-	-	-	-	-	-	-	-	-	NA	0	NA	0	NA	0
675		Feature_-_297.1526_2.9	297.153	-	297.153	-0.7	2.62	0.04	0	-	-	-	-	-	-	-	-	-	-	-	-	1	0	1	0	1	0
676		Feature_-_297.1523_2.6	297.152	-	297.152	0	2.59	0.08	0	-	-	-	-	-	-	-	-	-	-	-	-	NA	0	NA	0	NA	0
280		Feature_-_515.8489_22.9	515.849	-	515.849	0	22.9	0.38	12	429007	435753	407397	317004	322603	360752	346535	413174	350656	548754	422150	465777	0.0673508	-0.358647	0.148475	-0.308423	0.0848823	0.382267	1.07118	1.17166	0.828346
333		Feature_-_463.8696_22.8	463.87	-	463.87	0	22.83	0.35	12	47878	49966	51960	131625	110015	45256	110782	55240	48769	74276	104133	92231	0.422229	-0.357233	0.68434	-0.212637	0.393474	0.389102	0.405084	0.374452	0.164728
8156		Feature_+_164.9298_16.8	164.93	+	164.93	0	16.76	0.47	5	195508	-	227369	-	-	-	-	-	202197	227030	289242	-	0.177504	-0.356423	0.361144	-0.240467	0.281002	0.268581	0.551291	0.750791	0.44232
241		Feature_-_560.3113_22.9	560.311	-	560.311	0	22.86	0.39	12	262351	207829	245639	228802	207301	185726	152171	204713	152870	251397	216892	226329	0.0519018	-0.356304	0.797632	-0.025877	0.509695	0.158095	0.292689	1.28482	0.0981974
1873		Feature_-_160.9486_25.1	160.949	-	160.949	-0.6	24.87	0.22	12	246340	268295	289477	256166	188508	197259	192767	235390	235114	285940	265655	248553	0.0281734	-0.355451	0.767758	0.024652	0.104581	0.256188	0.980547	1.55016	0.114776
4448		Feature_-_70.9556_10.6	70.9556	-	70.9556	0	10.59	0.16	12	89123	83275	100276	88219	57995	63042	66644	98493	61851	107018	82761	102042	0.190565	-0.354918	0.49697	-0.102697	0.0876701	0.481795	1.05715	0.719958	0.30367
3312		Feature_-_96.9683_14.7	96.9683	-	96.9683	0	14.69	0.25	6	941148	-	1038627	-	-	-	-	-	930812	1080814	1180667	972975	0.0174764	-0.353238	0.127856	-0.246401	0.0624038	0.252059	1.20479	1.75755	0.893278
4311		Feature_-_78.9175_10.2	78.9175	-	78.9175	0	10.16	0.16	12	142374	144338	159922	129495	134295	120542	142614	124020	128403	160380	164747	169343	0.0081417	-0.352893	0.0916255	-0.189003	0.00344005	0.287705	2.46343	2.08928	1.03798
685		Feature_-_295.2270_2.7	295.227	-	295.227	0	2.71	0.1	0	-	-	-	-	-	-	-	-	-	-	-	-	NA	0	NA	0	NA	0
10384		Feature_+_420.7522_23.4	420.752	+	420.752	0	23.38	0.11	12	87020	85097	116909	125847	57432	85277	86518	107971	65896	129671	119899	107600	0.0571822	-0.35239	0.521275	-0.123562	0.0108063	0.763833	1.96632	1.24274	0.282933
833		Feature_-_244.9054_23.3	244.905	-	244.905	0	23.27	0.26	12	5629934	5220672	7684178	5881306	4122312	4578432	5245966	5834762	5198493	6946538	6651640	6387060	0.0221607	-0.351928	0.623979	-0.0892649	0.0244116	0.418718	1.6124	1.65442	0.20483
10622		Feature_+_674.8378_23.1	674.838	+	674.838	0.6	22.95	0.34	12	388191	468271	530451	379978	482908	394929	414410	430745	596287	472931	600078	509341	0.0436478	-0.351631	0.304991	-0.19876	0.618242	0.10882	0.208842	1.36004	0.515713
8643		Feature_+_176.0558_11.5	176.056	+	176.056	0	11.52	0.41	12	618583	577330	732325	590319	622127	578077	573984	558367	613669	788157	810301	582603	0.0972471	-0.350673	0.34632	-0.19905	0.207678	0.234094	0.68261	1.01212	0.460522
718		Feature_-_284.8856_23.4	284.886	-	284.886	0	23.36	0.26	12	98459	82715	131264	89898	83798	64116	95988	115547	97206	124945	116682	109774	0.181209	-0.350275	0.371456	-0.209631	0.0202314	0.330461	1.69397	0.741821	0.430093
8168		Feature_+_164.9299_17.6	164.93	+	164.93	0	17.34	0.23	5	171741	-	231021	-	-	-	-	-	191153	198841	245410	-	0.164842	-0.349553	0.626251	-0.140509	0.375788	0.209601	0.425057	0.782933	0.203251
692		Feature_-_294.9030_21.8	294.903	-	294.903	0.7	21.94	0.15	0	-	-	-	-	-	-	-	-	-	-	-	-	1	0	1	0	1	0
693		Feature_-_294.9030_22.1	294.903	-	294.903	0.7	22.33	0.25	0	-	-	-	-	-	-	-	-	-	-	-	-	NA	0	NA	0	NA	0
183		Feature_-_632.7906_22.7	632.791	-	632.791	-1.9	22.87	0.2	12	899527	668682	982973	774077	743546	815548	632225	833042	837683	979452	964373	961948	0.0319149	-0.349373	0.158759	-0.260502	0.0361663	0.228142	1.4417	1.49601	0.799261
2079		Feature_-_150.9612_22.8	150.961	-	150.961	0	22.78	0.34	12	128729	133245	197522	158227	213990	136823	123065	116986	140528	180327	120492	179247	0.17061	-0.34915	0.918195	0.026584	0.976051	-0.00952801	0.0105275	0.767996	0.0370653
696		Feature_-_294.9027_23.7	294.903	-	294.903	1	23.49	0.04	0	-	-	-	-	-	-	-	-	-	-	-	-	NA	0	NA	0	NA	0
635		Feature_-_311.8800_23.2	311.88	-	311.88	0	23.22	0.43	12	68201	46092	64911	87568	55568	47382	51128	92594	53379	103759	70750	68890	0.396826	-0.348965	0.416189	-0.293668	0.14531	0.458368	0.837704	0.401399	0.38071
192		Feature_-_620.7096_23.5	620.71	-	620.71	0	23.48	0.25	12	115398	106964	160185	129341	80735	105884	90769	115973	114188	146774	111627	139398	0.0937412	-0.347602	0.982573	-0.00475517	0.135043	0.358278	0.869528	1.02807	0.00763538
8314		Feature_+_168.1226_4.0	168.123	+	168.123	0.6	3.74	0.06	1	-	-	-	-	7242704	-	-	-	-	-	-	-	NA	0	NA	0	0.373901	-0.337877
300		Feature_-_496.7091_23.5	496.709	-	496.709	0	23.45	0.1	12	237751	199423	254746	224418	168870	190219	199191	229294	221675	265639	234444	287174	0.043877	-0.347585	0.177145	-0.214301	0.109512	0.32539	0.960537	1.35776	0.751672
175		Feature_-_641.8214_22.8	641.821	-	641.821	0	22.8	0.36	12	142924	98432	186009	148272	127459	100342	159056	103386	173768	163199	151387	146910	0.170072	-0.347207	0.729076	-0.0929077	0.709573	0.0552679	0.149003	0.769368	0.137227
702		Feature_-_293.1755_2.8	293.175	-	293.175	0	2.78	0.08	0	-	-	-	-	-	-	-	-	-	-	-	-	NA	0	NA	0	NA	0
10378		Feature_+_412.8201_23.3	412.82	+	412.82	0	23.28	0.29	12	70739	72147	183915	115424	52310	93959	103564	108854	68666	107197	143251	139264	0.0853575	-0.3471	0.8687	-0.0691005	0.00674174	1.02345	2.17123	1.06876	0.0611302
10205		Feature_+_330.8770_23.2	330.877	+	330.877	0	23.22	0.25	12	61450	65219	94266	86200	37533	61199	82286	77859	63329	107403	84088	89903	0.102909	-0.346301	0.345383	-0.195782	0.0217028	0.793822	1.66348	0.987548	0.461699
6853		Feature_+_136.0616_6.8	136.062	+	136.062	0	6.56	0.23	12	254648	204961	339410	186839	167130	220138	200221	257923	236377	280771	360317	221151	0.233384	-0.346203	0.524885	-0.237802	0.231984	0.38966	0.634542	0.631929	0.279936
706		Feature_-_291.8951_23.3	291.895	-	291.895	0	23.33	0.38	0	-	-	-	-	-	-	-	-	-	-	-	-	NA	0	NA	0	NA	0
707		Feature_-_291.8945_22.4	291.894	-	291.894	0	22.4	0.39	0	-	-	-	-	-	-	-	-	-	-	-	-	NA	0	NA	0	NA	0
708		Feature_-_291.8943_22.1	291.894	-	291.894	0	22.06	0.31	0	-	-	-	-	-	-	-	-	-	-	-	-	NA	0	NA	0	NA	0
709		Feature_-_291.8941_23.0	291.894	-	291.894	0	23.03	0.3	0	-	-	-	-	-	-	-	-	-	-	-	-	1	0	1	0	1	0
710		Feature_-_291.8940_22.7	291.894	-	291.894	0	22.93	0.24	0	-	-	-	-	-	-	-	-	-	-	-	-	NA	0	NA	0	NA	0
181		Feature_-_633.2911_22.8	633.291	-	633.291	0	22.76	0.31	12	152801	110810	190143	124900	114000	117310	172848	138156	150660	168757	179731	195490	0.0983431	-0.344879	0.199399	-0.353193	0.0463313	0.381907	1.33413	1.00726	0.700276
2383		Feature_-_138.9699_23.3	138.97	-	138.97	0	23.33	0.22	12	115438	115142	140078	103355	105712	104083	90545	111345	109674	137337	117008	134121	0.035028	-0.344384	0.471007	-0.115513	0.0498301	0.231724	1.30251	1.45558	0.326973
2080		Feature_-_150.9612_23.1	150.961	-	150.961	3.3	23.03	0.44	12	122267	133245	197522	114417	101000	129993	132658	113480	129256	161814	136401	179247	0.0707672	-0.344151	0.720952	-0.100984	0.0506161	0.437669	1.29571	1.15017	0.142094
714		Feature_-_288.8863_22.1	288.886	-	288.886	0	22.09	0.42	0	-	-	-	-	-	-	-	-	-	-	-	-	NA	0	NA	0	NA	0
1090		Feature_-_207.9525_23.1	207.952	-	207.952	-1	22.86	0.27	12	92477	45004	45435	118238	72076	73901	78086	39793	120133	113631	53396	76391	0.464972	-0.343984	0.719202	-0.222164	0.572408	-0.225936	0.242294	0.332573	0.143149
10413		Feature_+_446.0515_10.6	446.051	+	446.051	0	10.6	0.16	12	131391	120247	150042	133673	112015	106227	114832	151869	130842	162914	150160	160132	0.0828577	-0.343571	0.0709228	-0.228249	0.0114622	0.338474	1.94073	1.08167	1.14921
10383		Feature_+_418.8538_23.3	418.854	+	418.854	0	23.27	0.28	12	173147	154380	225539	166704	116365	152901	185371	197181	143129	203608	262778	213028	0.101301	-0.343531	0.196839	-0.313745	0.0287896	0.651121	1.54076	0.994385	0.705888
543		Feature_-_339.1990_2.6	339.199	-	339.199	0	2.57	0.09	1	-	-	-	-	-	-	-	-	-	6056623	-	-	0.373901	-0.214706	0.373901	-0.214706	0.373901	0.214706
10456		Feature_+_498.7234_23.4	498.723	+	498.723	0	23.44	0.21	12	68689	55259	100542	62578	63164	58491	69492	83862	57588	106408	74348	88008	0.184376	-0.343331	0.374791	-0.299506	0.0546033	0.504591	1.26278	0.734295	0.426211
3165		Feature_-_100.9843_22.3	100.984	-	100.984	0	22.59	0.23	12	19843820	24429300	24701444	23708830	17207450	17651778	17662482	24572996	18328974	25557252	21976072	28426972	0.145144	-0.342996	0.611221	-0.060523	0.0272195	0.455874	1.56512	0.838201	0.213802
10735		Feature_+_800.8087_22.6	800.809	+	800.809	2.7	22.85	0.25	12	1358104	965681	1505785	1184224	958718	1098882	1237102	1083294	1277940	1561726	1329310	1444360	0.0212277	-0.342472	0.254877	-0.24602	0.150853	0.270268	0.821446	1.6731	0.59367
1101		Feature_-_205.9648_22.9	205.965	-	205.965	0	22.87	0.12	12	755391	604667	862184	686896	415061	538166	599877	603285	468781	666795	792517	748508	0.0215693	-0.342435	0.841336	-0.0357738	0.165483	0.429602	0.781246	1.66616	0.0750305
723		Feature_-_283.2633_0.1	283.263	-	283.263	0	0.13	0.03	0	-	-	-	-	-	-	-	-	-	-	-	-	1	0	1	0	1	0
542		Feature_-_339.1993_2.8	339.199	-	339.199	-0.6	2.59	0.04	1	-	-	-	-	-	-	-	-	-	5807460	-	-	0.373901	-0.241722	0.373901	-0.241722	0.373901	0.241722
10518		Feature_+_559.8502_22.7	559.85	+	559.85	0	22.74	0.24	12	128451	160199	153405	175445	111386	137360	129036	131600	149593	144297	168164	192080	0.0643436	-0.342218	0.752009	-0.0449925	0.0957052	0.373607	1.01906	1.19149	0.123777
10303		Feature_+_372.3178_2.8	372.318	+	372.318	0.5	2.58	0.22	6	-	-	-	1756857	996330	-	-	84380	76828	105212	-	52395	0.651982	-0.341718	0.397616	3.25739	0.387212	-2.53674	0.412052	0.185764	0.400537
472		Feature_-_368.3953_22.8	368.395	-	368.395	0	22.76	0.26	12	35510	34640	100777	35144	54891	55010	42047	109513	52143	111319	106260	44179	0.571503	-0.341603	0.379451	-0.617946	0.151	0.876826	0.821022	0.242982	0.420844
117		Feature_-_719.0892_22.8	719.089	-	719.089	0	22.79	0.25	12	57487	116171	124060	46303	48815	150076	47166	54841	51231	112731	100861	105810	0.537065	-0.341475	0.683231	-0.156667	0.000232992	1.01972	3.63266	0.269973	0.165433
10796		Feature_+_928.7509_22.7	928.751	+	928.751	0	22.74	0.36	12	144801	143573	95331	101441	122713	110910	96504	113087	122875	110857	143971	151183	0.101647	-0.34119	0.326633	-0.254521	0.736294	0.0566064	0.132949	0.992907	0.48594
8940	Potassium Cluster Adduct	Feature_+_200.8934_23.3	200.893	+	200.893	0	23.34	0.28	12	10159443	8717624	12707800	10815950	8026885	8993911	8661686	10344881	8506459	11754364	11595146	12106271	0.00978582	-0.340569	0.408749	-0.137108	0.0116602	0.409571	1.93329	2.0094	0.388543
9313		Feature_+_212.1485_3.5	212.149	+	212.149	-0.5	3.33	0.06	2	-	-	-	-	8663657	-	-	-	-	-	5273272	-	0.373901	-0.106251	0.373901	-0.106251	0.491595	-0.315851
732		Feature_-_280.2359_2.6	280.236	-	280.236	0	2.62	0.09	0	-	-	-	-	-	-	-	-	-	-	-	-	NA	0	NA	0	NA	0
10290		Feature_+_362.3413_2.5	362.341	+	362.341	0	2.53	0.15	3	-	-	-	115519	124924	-	-	-	-	19805	-	-	0.373901	-0.340128	0.41304	1.71705	0.409579	-1.81246	0.387662	0.427243	0.384008
10734		Feature_+_800.8085_22.9	800.808	+	800.808	0	22.89	0.36	12	1358104	1283056	1591202	1184224	1104810	1098882	1237102	1151805	1319579	1561726	1408353	1444360	0.00731404	-0.339917	0.416331	-0.12129	0.0825061	0.222893	1.08351	2.13584	0.380562
10531		Feature_+_579.8600_22.6	579.86	+	579.86	2.8	22.75	0.23	12	270660	254804	240173	277748	323406	300441	207330	253325	309463	299074	385538	278295	0.188093	-0.339318	0.140954	-0.317441	0.615797	0.0918256	0.210563	0.725627	0.850923
736		Feature_-_277.2168_2.7	277.217	-	277.217	0	2.68	0.11	0	-	-	-	-	-	-	-	-	-	-	-	-	NA	0	NA	0	NA	0
10319		Feature_+_380.8737_22.6	380.874	+	380.874	-0.5	22.81	0.27	12	3683086	2863121	3646464	3442346	3555412	2644873	3307960	2912289	3130852	3953610	3390123	3871014	0.0397743	-0.339185	0.224309	-0.172349	0.309544	0.113072	0.509278	1.4004	0.649153
2096		Feature_-_148.8627_10.7	148.863	-	148.863	0	10.72	0.34	12	90472	74284	71164	78548	84671	67462	66767	71474	77310	103189	79013	77894	0.0965231	-0.338481	0.230907	-0.215571	0.793122	0.0430294	0.10066	1.01537	0.636562
10814		Feature_+_990.7487_22.9	990.749	+	990.749	0	22.88	0.39	12	124866	147091	135628	125913	98742	95309	113391	107000	102776	156671	134293	108148	0.137171	-0.338239	0.845814	0.0340085	0.208934	0.290223	0.67999	0.862738	0.0727253
10358		Feature_+_400.7646_23.5	400.765	+	400.765	0	23.5	0.13	12	77712	96139	124197	93149	84942	81163	111020	85285	82944	139060	116755	94908	0.197183	-0.338011	0.48455	-0.161936	0.0534944	0.514033	1.27169	0.70513	0.314662
5230		Feature_+_90.0917_0.1	90.0917	+	90.0917	0	0.14	0.02	1	-	-	-	-	-	-	-	-	4751942	-	-	-	1	0	1	0	0.373901	-0.0930888
10742		Feature_+_811.8012_22.8	811.801	+	811.801	0	22.84	0.34	12	224121	231805	318468	265527	298473	250788	206351	254029	326477	281114	308055	308951	0.0252672	-0.336718	0.364162	-0.138693	0.635049	0.081023	0.197192	1.59744	0.438706
10805		Feature_+_948.7685_22.8	948.769	+	948.769	0	22.81	0.29	12	93730	89568	133463	93857	83686	103634	80287	86449	141278	141500	108411	91298	0.221171	-0.335721	0.710109	-0.106683	0.761325	0.0984838	0.11843	0.655272	0.148675
6292		Feature_+_118.0661_5.7	118.066	+	118.066	0	5.68	0.48	12	162775	103928	128573	113047	129111	130707	124205	139068	168995	155746	176540	164722	0.00972805	-0.335147	0.00576272	-0.524383	0.431336	0.108875	0.365185	2.01197	2.23937
10748		Feature_+_822.7903_22.8	822.79	+	822.79	0	22.85	0.33	12	349244	299239	357180	333462	335891	240779	327566	332838	344321	410411	378230	347493	0.0884736	-0.334241	0.120253	-0.198806	0.128148	0.142251	0.892288	1.05319	0.919904
293		Feature_-_504.8566_22.7	504.857	-	504.857	0	22.69	0.3	12	217552	255784	336739	296548	242584	271898	254248	352328	345810	388066	354661	364742	0.074111	-0.334195	0.0455299	-0.316896	0.0679951	0.458511	1.16752	1.13012	1.3417
8302		Feature_+_166.9750_22.7	166.975	+	166.975	0	22.68	0.38	12	91562	117210	130666	116633	99482	105269	121359	101629	122874	123316	126243	163975	0.120139	-0.33318	0.304081	-0.182052	0.108423	0.397618	0.964877	0.920315	0.517011
137		Feature_-_685.7713_23.1	685.771	-	685.771	2	22.9	0.32	12	786091	746986	966619	803134	736648	709205	660742	862790	814881	873327	980669	958716	0.0490121	-0.333149	0.25098	-0.160406	0.0165841	0.266921	1.78031	1.3097	0.600361
3257	Phosphate associated Peak	Feature_-_96.9685_10.9	96.9685	-	96.9685	0	10.68	0.22	12	78168048	66999752	79645912	77701456	38718004	47814304	62770172	88175736	58892136	83742208	79035528	87436000	0.227062	-0.332132	0.135564	-0.157428	0.100146	0.509405	0.999366	0.643856	0.867854
160		Feature_-_655.7854_22.9	655.785	-	655.785	0	22.86	0.33	12	34642	42064	44064	33616	48082	45716	39834	36452	105092	50451	41649	61453	0.172269	-0.331832	0.161072	-0.358783	0.636137	-0.290583	0.19645	0.763794	0.792979
751		Feature_-_270.9248_15.1	270.925	-	270.925	0	15.03	0.26	0	-	-	-	-	-	-	-	-	-	-	-	-	NA	0	NA	0	NA	0
752		Feature_-_270.9247_14.8	270.925	-	270.925	0	14.79	0.25	0	-	-	-	-	-	-	-	-	-	-	-	-	1	0	1	0	1	0
1012		Feature_-_221.8902_23.3	221.89	-	221.89	0	23.35	0.14	12	142439	116004	148970	114451	85597	105333	97875	142779	139526	151739	134453	148937	0.1167	-0.330725	0.210596	-0.197628	0.306775	0.243456	0.51318	0.93293	0.67655
3204		Feature_-_98.9655_10.9	98.9655	-	98.9655	-1	10.68	0.21	12	31124916	26469130	31469890	31379776	15293610	19224352	25254516	34855200	23632538	33290206	31188016	35199292	0.22226	-0.329328	0.162202	-0.158304	0.104392	0.508861	0.981331	0.653138	0.789945
3208		Feature_-_98.9655_13.9	98.9655	-	98.9655	0	13.93	0.47	11	123331	131054	129513	147910	-	97223	92228	163036	91032	127625	158103	157033	0.293503	-0.328958	0.380115	-0.116273	0.0360225	0.548021	1.44343	0.532387	0.420085
57		Feature_-_813.7349_22.9	813.735	-	813.735	0	22.93	0.45	12	47068	56488	107122	132984	126350	101611	91778	147025	79124	112156	138171	177230	0.317222	-0.328826	0.211315	-0.527627	0.121845	0.759593	0.914192	0.498637	0.67507
10640		Feature_+_695.8470_22.8	695.847	+	695.847	0	22.81	0.4	12	151150	160285	160922	161114	192188	144661	135142	152988	177939	208772	170877	163893	0.0679554	-0.328721	0.217182	-0.172398	0.707537	0.0603413	0.150251	1.16778	0.663176
185		Feature_-_632.7900_22.9	632.79	-	632.79	0	22.93	0.4	12	899527	714176	1000184	774077	743546	815548	665988	833042	837683	979452	964373	961948	0.0208751	-0.328173	0.186105	-0.223682	0.0361663	0.228142	1.4417	1.68037	0.730242
633		Feature_-_311.9287_22.9	311.929	-	311.929	0	22.86	0.2	12	32659	25804	56076	32157	22694	29941	33786	103895	28625	56134	115245	39022	0.690802	-0.32793	0.265947	-0.88364	0.144398	1.32506	0.840438	0.160646	0.575206
760		Feature_-_265.1076_2.7	265.108	-	265.108	0	2.69	0.09	0	-	-	-	-	-	-	-	-	-	-	-	-	NA	0	NA	0	NA	0
750		Feature_-_271.9373_22.8	271.937	-	271.937	0	22.83	0.16	12	166085	175815	270012	201231	160876	154170	137555	253259	191405	228622	266314	189033	0.336487	-0.327717	0.749121	-0.0800359	0.0848827	0.39996	1.07118	0.473032	0.125448
2386		Feature_-_138.9405_23.1	138.94	-	138.94	-1.4	23.31	0.21	12	8730265	7753672	10040557	8815618	5680083	6484614	7124870	8881365	6764104	10726414	7453738	10046012	0.194432	-0.327695	0.675725	-0.0850729	0.153859	0.414708	0.812876	0.711232	0.17023
778		Feature_-_256.2357_2.7	256.236	-	256.236	0	2.68	0.22	6	-	-	-	298149	620830	-	-	139471	248137	187490	134010	-	0.395868	-0.326926	0.749668	0.234211	0.311913	-1.20647	0.505967	0.40245	0.125131
7283		Feature_+_142.9479_17.9	142.948	+	142.948	0	17.64	0.25	5	273592	-	343506	-	-	-	-	-	300780	333396	410394	-	0.168865	-0.326508	0.411817	-0.199736	0.249571	0.264008	0.602806	0.772459	0.385295
56		Feature_-_817.3965_22.7	817.396	-	817.396	0	22.73	0.24	12	103595	43689	91939	38013	34243	32570	30160	84189	55670	105801	33431	44977	0.685632	-0.326323	0.906694	-0.0852359	0.923695	-0.0710497	0.0344712	0.163909	0.0425393
10702		Feature_+_749.7977_22.8	749.798	+	749.798	0	22.75	0.3	12	120170	121464	113710	121842	117923	79970	138899	83441	111506	111682	165969	101353	0.407944	-0.326184	0.735268	-0.0862243	0.653009	0.116512	0.185081	0.389399	0.133554
9890		Feature_+_262.8552_23.4	262.855	+	262.855	0	23.38	0.1	12	277096	229570	305813	275017	202251	241368	252618	254706	226485	349484	295972	292809	0.028498	-0.325623	0.212776	-0.211361	0.054168	0.410671	1.26626	1.54518	0.672076
10460		Feature_+_506.7935_23.4	506.793	+	506.793	0	23.37	0.14	12	223837	193397	290387	256956	162108	179177	169729	273382	172883	279063	258439	241996	0.20639	-0.324963	0.69271	-0.0735781	0.0281311	0.480141	1.55081	0.685311	0.159448
4451		Feature_-_70.9340_10.6	70.934	-	70.934	0	10.64	0.13	12	63344	79207	101194	87016	67664	68223	73040	90429	82526	90570	99012	100564	0.0585323	-0.324571	0.348773	-0.117688	0.0178898	0.442313	1.74739	1.2326	0.457457
10769		Feature_+_862.8091_22.8	862.809	+	862.809	0	22.84	0.31	12	585864	555116	554059	553429	550049	487097	637645	597653	521165	638168	756719	761927	0.0748831	-0.324486	0.0151477	-0.375457	0.0201142	0.38026	1.6965	1.12562	1.81965
3198		Feature_-_98.9656_13.7	98.9656	-	98.9656	0	13.66	0.45	12	128505	131054	129513	158599	105178	106251	95582	163842	93004	142740	158103	157033	0.230887	-0.324395	0.293057	-0.127435	0.01924	0.487048	1.71579	0.6366	0.533048
10808		Feature_+_968.7717_23.1	968.772	+	968.772	2	22.91	0.29	12	527146	441221	519717	371085	350880	360730	376018	447044	415256	472769	494062	513960	0.0273153	-0.322952	0.327999	-0.152749	0.302456	0.195331	0.519338	1.56359	0.484127
811		Feature_-_250.9750_10.5	250.975	-	250.975	0	10.53	0.12	12	96822	81057	117850	111573	75404	81551	93653	105760	131846	123734	106960	120704	0.0539571	-0.322721	0.335868	-0.178606	0.411966	0.208693	0.385139	1.26795	0.473831
10488		Feature_+_530.8276_23.2	530.828	+	530.828	-0.8	22.98	0.28	12	299713	331529	463351	377573	410126	329380	416774	378316	468624	528330	463194	414258	0.0872872	-0.322128	0.200722	-0.261843	0.272036	0.254466	0.565374	1.05905	0.697404
4304		Feature_-_80.0105_22.4	80.0105	-	80.0105	-1.2	22.6	0.23	12	2169181	1792773	2196342	1862824	1405245	1598685	1780156	1868084	1932733	2285949	2100548	2167825	0.0105228	-0.320974	0.159746	-0.163532	0.207222	0.251138	0.683564	1.97787	0.796569
8167		Feature_+_164.9299_17.3	164.93	+	164.93	-0.6	17.09	0.24	4	-	-	219440	-	-	-	-	-	215236	233679	250338	-	0.122444	-0.320926	0.331614	-0.207406	0.300266	0.218052	0.522493	0.912061	0.479367
9417		Feature_+_213.9389_22.9	213.939	+	213.939	0	22.92	0.44	12	106915	100530	104946	85050	108623	82094	91769	89644	106518	86236	127923	114792	0.159733	-0.320031	0.402902	-0.179205	0.861118	0.0305611	0.0649373	0.796606	0.394801
3340		Feature_-_96.9211_10.7	96.9211	-	96.9211	0	10.74	0.11	12	245237	195673	228996	189173	175454	240494	213947	216888	193886	267939	256401	313703	0.045791	-0.320004	0.0251023	-0.449157	0.0522041	0.44743	1.2823	1.33922	1.60029
779		Feature_-_255.2326_16.2	255.233	-	255.233	0	16.25	0.39	0	-	-	-	-	-	-	-	-	-	-	-	-	NA	0	NA	0	NA	0
780		Feature_-_255.2325_1.4	255.232	-	255.232	0	1.38	0.48	0	-	-	-	-	-	-	-	-	-	-	-	-	NA	0	NA	0	NA	0
773		Feature_-_258.1780_2.7	258.178	-	258.178	0	2.69	0.15	11	65544	73774	60935	53559	67145	44391	41411	62243	63764	104170	41548	-	0.611585	-0.319852	0.960684	0.0269	0.864186	-0.0882964	0.0633928	0.213543	0.0174192
782		Feature_-_255.2325_5.1	255.232	-	255.232	0	5.07	0.4	0	-	-	-	-	-	-	-	-	-	-	-	-	NA	0	NA	0	NA	0
783		Feature_-_255.2325_22.8	255.232	-	255.232	0	22.78	0.44	0	-	-	-	-	-	-	-	-	-	-	-	-	1	0	1	0	1	0
784		Feature_-_255.2324_1.1	255.232	-	255.232	0.4	1.07	0.4	0	-	-	-	-	-	-	-	-	-	-	-	-	1	0	1	0	1	0
357		Feature_-_442.7816_23.4	442.782	-	442.782	0	23.39	0.1	12	166341	152367	262516	176381	118756	172249	192141	189599	190298	225269	254554	211251	0.032383	-0.318983	0.405216	-0.225038	0.0430955	0.539713	1.36557	1.48968	0.392313
3194		Feature_-_98.9656_11.5	98.9656	-	98.9656	0	11.22	0.21	12	501380	433891	575997	586256	342934	362828	395208	664955	396598	579820	511946	682057	0.338922	-0.317936	0.443501	-0.152271	0.0590115	0.515461	1.22906	0.4699	0.353106
787		Feature_-_255.2324_3.5	255.232	-	255.232	0	3.47	0.47	0	-	-	-	-	-	-	-	-	-	-	-	-	NA	0	NA	0	NA	0
788		Feature_-_255.2324_4.2	255.232	-	255.232	0	4.18	0.45	0	-	-	-	-	-	-	-	-	-	-	-	-	NA	0	NA	0	NA	0
789		Feature_-_255.2324_4.6	255.232	-	255.232	0	4.58	0.48	0	-	-	-	-	-	-	-	-	-	-	-	-	NA	0	NA	0	NA	0
790		Feature_-_255.2324_6.7	255.232	-	255.232	0	6.66	0.44	0	-	-	-	-	-	-	-	-	-	-	-	-	NA	0	NA	0	NA	0
791		Feature_-_255.2323_0.1	255.232	-	255.232	0	0.13	0.02	0	-	-	-	-	-	-	-	-	-	-	-	-	NA	0	NA	0	NA	0
792		Feature_-_255.2323_0.8	255.232	-	255.232	0	0.58	0.25	0	-	-	-	-	-	-	-	-	-	-	-	-	NA	0	NA	0	NA	0
793		Feature_-_255.2323_3.9	255.232	-	255.232	1.6	3.95	0.33	0	-	-	-	-	-	-	-	-	-	-	-	-	NA	0	NA	0	NA	0
794		Feature_-_255.2323_5.6	255.232	-	255.232	0	5.64	0.48	0	-	-	-	-	-	-	-	-	-	-	-	-	NA	0	NA	0	NA	0
795		Feature_-_255.2323_6.1	255.232	-	255.232	0	6.15	0.47	0	-	-	-	-	-	-	-	-	-	-	-	-	NA	0	NA	0	NA	0
796		Feature_-_255.2323_7.5	255.232	-	255.232	0	7.48	0.35	0	-	-	-	-	-	-	-	-	-	-	-	-	NA	0	NA	0	NA	0
797		Feature_-_255.2322_8.6	255.232	-	255.232	0	8.58	0.48	0	-	-	-	-	-	-	-	-	-	-	-	-	1	0	1	0	1	0
798		Feature_-_255.2322_14.1	255.232	-	255.232	0	14.12	0.5	0	-	-	-	-	-	-	-	-	-	-	-	-	NA	0	NA	0	NA	0
799		Feature_-_255.2321_0.5	255.232	-	255.232	0	0.25	0.25	0	-	-	-	-	-	-	-	-	-	-	-	-	NA	0	NA	0	NA	0
800		Feature_-_255.2321_1.7	255.232	-	255.232	1.2	1.75	0.36	0	-	-	-	-	-	-	-	-	-	-	-	-	NA	0	NA	0	NA	0
801		Feature_-_255.2321_3.2	255.232	-	255.232	1.2	2.98	0.24	0	-	-	-	-	-	-	-	-	-	-	-	-	NA	0	NA	0	NA	0
802		Feature_-_255.2321_15.0	255.232	-	255.232	0	15.05	0.16	0	-	-	-	-	-	-	-	-	-	-	-	-	1	0	1	0	1	0
803		Feature_-_255.2320_1.9	255.232	-	255.232	0	1.93	0.36	0	-	-	-	-	-	-	-	-	-	-	-	-	1	0	1	0	1	0
804		Feature_-_254.8927_15.0	254.893	-	254.893	0	14.98	0.12	0	-	-	-	-	-	-	-	-	-	-	-	-	NA	0	NA	0	NA	0
649		Feature_-_303.9782_10.6	303.978	-	303.978	0	10.61	0.1	12	119777	119844	160432	101265	99942	129670	112296	127697	121739	171459	155917	133379	0.0696984	-0.317789	0.270618	-0.272162	0.0382547	0.432292	1.41732	1.15678	0.567644
10282		Feature_+_360.8130_23.7	360.813	+	360.813	-0.6	23.44	0.05	12	1323058	1472274	1869399	1526675	914716	1077714	1431546	1572157	1008463	1883667	1810850	1389908	0.191384	-0.317015	0.734221	-0.0626523	0.036034	0.647316	1.44329	0.718095	0.134173
10709		Feature_+_759.8218_22.9	759.822	+	759.822	0	22.92	0.45	12	76446	114104	89091	96713	78927	93598	83838	75018	106123	82832	137081	94406	0.300271	-0.316209	0.803615	-0.0677095	0.407397	0.265441	0.389982	0.522486	0.094952
866		Feature_-_230.9356_22.8	230.936	-	230.936	0	22.83	0.43	12	465444	389273	489212	409005	448439	420653	417052	437872	482365	606112	479324	502537	0.0578072	-0.316036	0.113193	-0.302625	0.18697	0.185631	0.728229	1.23802	0.946182
8615		Feature_+_172.0667_9.8	172.067	+	172.067	0	9.79	0.07	12	222970	279020	324891	242136	300104	295269	365847	235498	224090	163754	328902	623357	0.628037	-0.315795	0.545834	-0.399544	0.419649	0.578857	0.377114	0.202015	0.262939
9767		Feature_+_234.8520_23.1	234.852	+	234.852	-0.4	22.89	0.28	12	155171	150095	176733	141619	131389	139672	133195	126479	158228	175257	166842	154777	0.00998943	-0.315247	0.478455	-0.085	0.168985	0.159768	0.772151	2.00046	0.320159
10036		Feature_+_300.8102_23.4	300.81	+	300.81	0	23.4	0.07	12	449211	453598	521143	556022	274930	352562	448068	490672	326508	528300	480975	596520	0.118263	-0.314461	0.608275	-0.0690368	0.0398113	0.612007	1.39999	0.927152	0.2159
10798		Feature_+_937.7732_22.8	937.773	+	937.773	0	22.78	0.24	12	241826	230086	238213	179483	118254	176714	134553	169440	168701	283595	168729	145271	0.432358	-0.31401	0.737321	0.11634	0.702074	0.176498	0.153617	0.364157	0.132343
8803		Feature_+_185.1269_18.4	185.127	+	185.127	-0.5	18.6	0.03	12	5226541	5565755	6701709	5272313	4782734	5043117	4259362	5377538	5127142	6616360	6581421	5051801	0.124258	-0.31401	0.743736	-0.057233	0.123407	0.26984	0.90866	0.905676	0.128581
552		Feature_-_336.9008_22.7	336.901	-	336.901	-19.6	22.82	0.39	12	547996	1633687	1423572	1555653	1000833	1777312	1509406	550025	1569511	1469209	1570880	1728239	0.459816	-0.313601	0.622103	-0.0478057	0.145656	0.612705	0.836672	0.337416	0.206137
815		Feature_-_250.8911_7.4	250.891	-	250.891	0	7.41	0.1	0	-	-	-	-	-	-	-	-	-	-	-	-	NA	0	NA	0	NA	0
10809		Feature_+_968.7726_22.8	968.773	+	968.773	0	22.84	0.3	12	527146	441221	538871	371085	350880	360730	456510	447044	429761	504806	494062	572316	0.0589993	-0.313532	0.249416	-0.217635	0.195508	0.264725	0.708836	1.22915	0.603076
1301		Feature_-_184.9672_22.4	184.967	-	184.967	-1.6	22.6	0.25	12	6503070	7247418	6874336	7266919	4145716	5365676	5466746	6186078	5620185	7725653	6146633	7269256	0.0622252	-0.312977	0.87369	0.0167664	0.122792	0.377958	0.91083	1.20603	0.0586428
3196		Feature_-_98.9656_13.1	98.9656	-	98.9656	0	13.15	0.43	12	177308	195670	149703	153312	117062	107517	134288	195060	138623	211103	131520	200074	0.381688	-0.312959	0.638865	-0.122018	0.296732	0.325803	0.527636	0.418291	0.194591
819		Feature_-_248.8931_7.4	248.893	-	248.893	0	7.41	0.1	0	-	-	-	-	-	-	-	-	-	-	-	-	NA	0	NA	0	NA	0
3206		Feature_-_98.9655_11.8	98.9655	-	98.9655	0	11.65	0.23	12	308963	273424	342613	348480	226383	282407	275937	408094	226195	444272	313902	441977	0.269837	-0.312467	0.18678	-0.315337	0.0459805	0.656222	1.33743	0.568898	0.728671
10574		Feature_+_622.7238_23.7	622.724	+	622.724	3.7	23.52	0.3	12	424923	416987	431883	372792	284660	333164	352753	394346	353657	405370	461578	474306	0.0352799	-0.3122	0.222539	-0.134737	0.11247	0.335115	0.948962	1.45247	0.652594
476		Feature_-_368.0072_22.9	368.007	-	368.007	0	22.86	0.22	12	107644	99510	103119	87503	57454	95492	82423	86013	58765	110322	108440	108915	0.00571249	-0.31213	0.0580309	-0.175565	0.104356	0.549658	0.981482	2.24317	1.23634
124		Feature_-_710.1160_23.0	710.116	-	710.116	0	22.97	0.45	12	55072	32389	33013	32679	33618	38553	116223	38573	42984	104200	86153	49609	0.636867	-0.311599	0.0421772	-1.29076	0.104055	0.865835	0.982736	0.195951	1.37492
195		Feature_-_614.7964_22.7	614.796	-	614.796	0	22.73	0.29	12	139039	162324	160404	174968	172956	154824	139863	171131	143096	151976	179529	245619	0.27295	-0.309115	0.400318	-0.213617	0.24361	0.342726	0.613305	0.563917	0.397594
345		Feature_-_454.8508_22.8	454.851	-	454.851	0	22.77	0.31	12	33106	47030	40417	55757	38336	115038	40170	61129	55097	104707	117723	45543	0.613543	-0.308807	0.140226	-0.904016	0.111722	1.08251	0.95186	0.212155	0.853172
405		Feature_-_404.8249_23.3	404.825	-	404.825	0	23.31	0.17	12	385600	404286	531878	415980	261723	387230	362985	443546	378417	542839	443895	491724	0.0633399	-0.308579	0.444976	-0.128844	0.0375663	0.527428	1.4252	1.19832	0.351664
1009		Feature_-_222.8847_23.4	222.885	-	222.885	0	23.39	0.08	12	1143258	1085834	1505289	1252719	874551	892119	1165189	1336291	1048118	1336586	1375298	1489252	0.121321	-0.307963	0.412253	-0.12823	0.0141831	0.454456	1.84823	0.916062	0.384836
4450		Feature_-_70.9448_10.6	70.9448	-	70.9448	0	10.61	0.12	12	4831443	4530090	5649978	5157428	3794694	3676066	4121203	5899690	4468272	5759347	5383418	5810536	0.192084	-0.307711	0.199624	-0.144503	0.017968	0.372615	1.7455	0.71651	0.699788
10677		Feature_+_717.8293_22.9	717.829	+	717.829	0	22.88	0.37	12	164623	153302	172336	162937	170315	141296	147789	164051	135778	183679	203206	173707	0.0311326	-0.307007	0.0793793	-0.198371	0.0950418	0.252094	1.02209	1.50678	1.10029
10815		Feature_+_999.7794_22.9	999.779	+	999.779	0	22.88	0.39	12	153547	104254	146651	111578	100920	124142	110693	157830	139862	168800	173283	143697	0.137888	-0.307004	0.0620438	-0.42239	0.17028	0.300903	0.768836	0.860472	1.2073
7214		Feature_+_139.1189_8.3	139.119	+	139.119	0	8.18	0.42	12	209731	208276	202199	211361	195777	147213	189010	193290	189836	158736	312760	183583	0.449239	-0.307003	0.828117	-0.0751348	0.700162	0.137945	0.154801	0.347523	0.0819082
7246		Feature_+_141.0771_5.0	141.077	+	141.077	0	5.01	0.42	3	112367	64108	-	-	-	-	-	-	-	-	-	68563	0.373901	-0.306908	0.910642	-0.0438836	0.603077	-0.372485	0.219627	0.427243	0.0406522
251		Feature_-_547.8264_22.9	547.826	-	547.826	0	22.89	0.45	12	96040	106688	109948	147129	106826	148433	124510	121996	133285	169118	121648	197615	0.259135	-0.306377	0.180991	-0.425	0.109822	0.538898	0.959309	0.586473	0.742343
278		Feature_-_516.7979_23.3	516.798	-	516.798	0	23.26	0.41	12	145180	164666	213142	163045	92667	122942	166050	178558	141859	213723	189771	174216	0.146105	-0.305225	0.573233	-0.0951089	0.0322965	0.605463	1.49085	0.835335	0.241669
526		Feature_-_346.0552_10.7	346.055	-	346.055	0	10.74	0.15	12	3083652	2962762	4236268	2844747	1637397	2616771	2335088	2775907	1712675	3377858	3260416	2904757	0.0344288	-0.304396	0.739171	0.0737824	0.102434	0.568794	0.989556	1.46308	0.131255
5869		Feature_+_106.0457_22.8	106.046	+	106.046	0	22.82	0.35	12	126510	110353	93654	93379	81527	75938	109478	102225	97464	116555	129104	109502	0.12651	-0.304204	0.0743145	-0.256136	0.313264	0.217296	0.50409	0.897876	1.12893
837		Feature_-_242.1752_3.1	242.175	-	242.175	0	3.09	0.07	0	-	-	-	-	-	-	-	-	-	-	-	-	NA	0	NA	0	NA	0
838		Feature_-_241.9613_3.5	241.961	-	241.961	0	3.52	0.08	0	-	-	-	-	-	-	-	-	-	-	-	-	NA	0	NA	0	NA	0
722		Feature_-_283.2637_2.8	283.264	-	283.264	0.7	2.68	0.14	6	-	-	-	789705	1744031	-	-	349203	425772	439080	373668	-	0.32268	-0.303719	0.690244	0.287856	0.392528	-1.17959	0.40613	0.491229	0.160998
565		Feature_-_334.9206_22.8	334.921	-	334.921	0	22.76	0.46	12	239151	260818	245264	303700	275538	274635	255906	270023	282554	311789	298494	377798	0.0678952	-0.303613	0.119636	-0.287096	0.0853073	0.30961	1.06901	1.16816	0.922138
3197		Feature_-_98.9656_13.4	98.9656	-	98.9656	-1	13.29	0.34	12	177308	114981	136568	158599	105178	106251	115369	172822	112132	182238	125970	178534	0.328145	-0.303344	0.312421	-0.247013	0.353609	0.302701	0.451476	0.483935	0.505259
842		Feature_-_239.0588_2.7	239.059	-	239.059	0	2.65	0.26	0	-	-	-	-	-	-	-	-	-	-	-	-	NA	0	NA	0	NA	0
843		Feature_-_238.8906_15.0	238.891	-	238.891	0	14.98	0.25	0	-	-	-	-	-	-	-	-	-	-	-	-	NA	0	NA	0	NA	0
16		Feature_-_908.7003_23.1	908.7	-	908.7	1.7	22.93	0.27	12	269436	260430	365582	250413	267041	230234	244934	222174	246014	268018	279535	312260	0.0217471	-0.302157	0.894348	0.0276077	0.165141	0.135949	0.782146	1.6626	0.0484937
10219		Feature_+_338.8043_23.4	338.804	+	338.804	0	23.4	0.28	12	193270	198279	317376	244410	154679	174137	208215	254586	188720	271265	268440	245538	0.115885	-0.301986	0.825274	-0.0470164	0.00481563	0.549107	2.31735	0.935973	0.083402
18		Feature_-_897.7020_22.9	897.702	-	897.702	0	22.86	0.27	12	208672	126807	214441	227171	232221	177899	177950	212381	214238	305882	211818	182209	0.323479	-0.300692	0.420218	-0.300213	0.714181	0.0953839	0.146191	0.490154	0.376525
34		Feature_-_860.0450_22.9	860.045	-	860.045	0	22.86	0.31	12	172420	100813	215467	124219	215007	138050	185066	137624	147087	244770	169140	153563	0.332098	-0.300599	0.399312	-0.365413	0.765689	0.086324	0.115947	0.478734	0.398688
3259		Feature_-_96.9685_11.4	96.9685	-	96.9685	0	11.19	0.24	12	1471999	1315025	1888248	1714391	1167001	1133834	1358251	1954599	1255594	1933042	1533940	2009748	0.296012	-0.300585	0.453769	-0.155342	0.0381436	0.491842	1.41858	0.528691	0.343165
1755		Feature_-_164.9631_22.6	164.963	-	164.963	1.2	22.76	0.24	12	205611	209671	254236	221320	181524	220541	205608	178753	249693	256271	248216	240533	0.0231469	-0.300578	0.230285	-0.120697	0.152888	0.226375	0.815626	1.63551	0.637733
10327		Feature_+_381.9021_22.9	381.902	+	381.902	0	22.94	0.49	12	321295	264898	314981	281436	331408	272539	300826	254117	265690	271846	372076	375154	0.155522	-0.300462	0.228234	-0.242649	0.444555	0.150078	0.352075	0.808208	0.64162
8166		Feature_+_164.9299_17.1	164.93	+	164.93	-0.6	17	0.4	4	-	-	227369	-	-	-	-	-	215236	233679	268294	-	0.143845	-0.299908	0.343439	-0.197861	0.261596	0.227327	0.582368	0.842105	0.46415
6515		Feature_+_128.0818_4.7	128.082	+	128.082	0	4.65	0.44	3	83738	76117	-	-	-	-	-	-	-	-	115259	-	0.373901	-0.299683	0.459202	-0.244114	0.560321	0.193235	0.251563	0.427243	0.337997
9930		Feature_+_271.0266_12.7	271.027	+	271.027	0	12.74	0.17	12	191547	220981	226810	133916	212433	163861	173782	148079	268555	224311	225626	147899	0.235067	-0.299619	0.898384	-0.0394571	0.51015	-0.16986	0.292302	0.628809	0.0465382
684		Feature_-_295.4039_23.0	295.404	-	295.404	0	22.97	0.48	12	386426	307421	504500	320660	340825	387172	292169	303996	448277	305329	466198	438196	0.262613	-0.298919	0.765854	-0.0950625	0.855205	0.0413678	0.0679298	0.580683	0.115854
683		Feature_-_295.4054_22.7	295.405	-	295.405	-3.4	22.86	0.34	12	386426	307421	445534	320660	340825	387172	292169	303996	448277	305329	466198	438196	0.262613	-0.298919	0.531466	-0.1722	0.855205	0.0413678	0.0679298	0.580683	0.274524
5606		Feature_+_98.0716_4.7	98.0716	+	98.0716	0	4.65	0.43	4	472043	801039	-	-	-	-	-	508660	-	-	822278	-	0.478818	-0.298268	0.970629	-0.0183645	0.426689	0.337482	0.369889	0.31983	0.0129469
10699		Feature_+_747.8307_23.1	747.831	+	747.831	-2.3	22.89	0.29	12	453775	412643	544544	442947	335876	387191	383791	482247	459578	542451	512021	486019	0.057069	-0.29774	0.33866	-0.137825	0.0892998	0.302352	1.04915	1.2436	0.470236
858		Feature_-_235.9531_7.3	235.953	-	235.953	-0.4	7.55	0.21	0	-	-	-	-	-	-	-	-	-	-	-	-	1	0	1	0	1	0
859		Feature_-_235.9531_9.9	235.953	-	235.953	0	9.92	0.24	0	-	-	-	-	-	-	-	-	-	-	-	-	1	0	1	0	1	0
860		Feature_-_235.9530_7.6	235.953	-	235.953	0	7.57	0.23	0	-	-	-	-	-	-	-	-	-	-	-	-	1	0	1	0	1	0
861		Feature_-_235.9529_7.8	235.953	-	235.953	0.4	7.63	0.06	0	-	-	-	-	-	-	-	-	-	-	-	-	NA	0	NA	0	NA	0
862		Feature_-_235.9526_11.4	235.953	-	235.953	0	11.42	0.24	0	-	-	-	-	-	-	-	-	-	-	-	-	NA	0	NA	0	NA	0
863		Feature_-_232.9241_11.3	232.924	-	232.924	0	11.35	0.13	0	-	-	-	-	-	-	-	-	-	-	-	-	NA	0	NA	0	NA	0
864		Feature_-_232.8731_14.9	232.873	-	232.873	0	14.93	0.15	0	-	-	-	-	-	-	-	-	-	-	-	-	NA	0	NA	0	NA	0
207		Feature_-_602.6748_23.4	602.675	-	602.675	0	23.39	0.13	12	48930	86732	112991	67096	55147	42814	69269	74494	56346	87107	66163	75974	0.28463	-0.297113	0.439511	0.218977	0.0239141	0.515003	1.62135	0.54572	0.35703
7339		Feature_+_144.8956_23.3	144.896	+	144.896	0	23.28	0.11	12	194523	197420	273805	233434	182894	194045	196994	211948	168672	255332	227886	257248	0.0140101	-0.296307	0.645254	-0.0715082	0.00582497	0.439297	2.23471	1.85356	0.19027
4005		Feature_-_87.9713_10.3	87.9713	-	87.9713	0	10.56	0.04	12	695560	794652	903303	750254	543342	518762	622912	839746	913082	895148	785496	751767	0.221772	-0.295852	0.937171	0.00933971	0.464408	0.17672	0.3331	0.654093	0.0281811
6674		Feature_+_129.3023_23.1	129.302	+	129.302	-0.8	22.88	0.21	12	130948	165553	147908	167358	134456	138363	147786	105513	141464	158368	136170	186240	0.199323	-0.295762	0.99935	0.000123026	0.171566	0.24081	0.765569	0.700444	0.000282589
42		Feature_-_838.3915_22.9	838.391	-	838.391	0	22.89	0.37	12	107200	83913	38729	50629	34277	46596	39439	44116	56251	73949	48335	37420	0.422171	-0.295214	0.80692	0.11763	0.627571	-0.308117	0.202337	0.374511	0.0931695
10508	Beta-nicotinamide Ribotide In-Source Fragment	Feature_+_552.0586_10.6	552.059	+	552.059	0	10.58	0.18	12	174503	142168	182192	173959	114751	146213	143893	195589	151136	181467	200102	214326	0.130602	-0.295008	0.103418	-0.257989	0.0590737	0.436276	1.22861	0.884049	0.985405
200		Feature_-_613.2947_23.1	613.295	-	613.295	0.7	22.9	0.26	12	247046	203939	283000	176759	216550	119099	162233	224265	179471	195415	233463	191388	0.315467	-0.294899	0.696879	0.0976399	0.764445	-0.052082	0.116654	0.501047	0.156843
10220		Feature_+_338.8303_24.0	338.83	+	338.83	2.1	23.79	0.02	12	1860420	1497201	2153490	1842444	1843181	1909504	1290254	1282254	2127817	1737811	2389410	1369148	0.404936	-0.294332	0.997712	-0.000849115	0.73861	-0.0853679	0.131585	0.392614	0.000994696
10465		Feature_+_508.8444_22.6	508.844	+	508.844	-1.6	22.81	0.23	12	573538	470708	550976	590038	529712	503709	446596	465350	512868	606537	495463	633894	0.0790415	-0.294209	0.493608	-0.107076	0.434653	0.103146	0.361857	1.10214	0.306618
6852		Feature_+_136.0615_10.7	136.061	+	136.061	0	10.73	0.4	12	100146	94424	128189	69838	48186	76607	63803	94702	85433	92971	101984	93309	0.13365	-0.294043	0.939117	0.0208042	0.312739	0.302332	0.504818	0.874031	0.0272805
8856		Feature_+_195.1223_3.8	195.122	+	195.122	-0.5	3.59	0.04	2	-	-	-	-	5722154	-	-	-	-	-	4290059	-	0.373901	-0.0951652	0.373901	-0.0951652	0.564037	-0.170538
4449		Feature_-_70.9448_10.4	70.9448	-	70.9448	0	10.57	0.07	12	4831443	4530090	5176438	5157428	3794694	3676066	4121203	5869808	4468272	5759347	5383418	5609201	0.20414	-0.293626	0.0578625	-0.172512	0.0194826	0.355379	1.71035	0.690071	1.2376
823		Feature_-_246.9815_10.6	246.982	-	246.982	0	10.59	0.14	12	90587	72940	113030	101336	63716	81139	78352	91997	81408	116380	112932	78894	0.209801	-0.293405	0.700899	-0.101307	0.166954	0.386876	0.777404	0.678192	0.154344
878		Feature_-_228.9314_11.0	228.931	-	228.931	0	11.03	0.37	0	-	-	-	-	-	-	-	-	-	-	-	-	1	0	1	0	1	0
879		Feature_-_228.9313_8.2	228.931	-	228.931	0	8.21	0.44	0	-	-	-	-	-	-	-	-	-	-	-	-	NA	0	NA	0	NA	0
880		Feature_-_228.9313_12.8	228.931	-	228.931	-0.4	12.91	0.31	0	-	-	-	-	-	-	-	-	-	-	-	-	NA	0	NA	0	NA	0
881		Feature_-_228.9313_17.3	228.931	-	228.931	0	17.25	0.44	0	-	-	-	-	-	-	-	-	-	-	-	-	NA	0	NA	0	NA	0
605		Feature_-_322.8411_23.7	322.841	-	322.841	-2.2	23.5	0.25	12	207287	235261	301870	168706	196068	187246	207030	203075	193635	250901	230671	250480	0.00756252	-0.293367	0.833758	-0.0526111	0.00465961	0.294239	2.33165	2.12133	0.0789602
883		Feature_-_228.9313_27.8	228.931	-	228.931	-1.7	27.69	0.32	0	-	-	-	-	-	-	-	-	-	-	-	-	NA	0	NA	0	NA	0
884		Feature_-_228.9312_10.0	228.931	-	228.931	-0.4	9.88	0.31	0	-	-	-	-	-	-	-	-	-	-	-	-	NA	0	NA	0	NA	0
885		Feature_-_228.9312_10.4	228.931	-	228.931	0	10.42	0.31	0	-	-	-	-	-	-	-	-	-	-	-	-	NA	0	NA	0	NA	0
886		Feature_-_228.9312_13.8	228.931	-	228.931	0	13.79	0.38	0	-	-	-	-	-	-	-	-	-	-	-	-	NA	0	NA	0	NA	0
887		Feature_-_228.9312_14.1	228.931	-	228.931	0	13.93	0.25	0	-	-	-	-	-	-	-	-	-	-	-	-	NA	0	NA	0	NA	0
888		Feature_-_228.9312_16.2	228.931	-	228.931	0	16.41	0.25	0	-	-	-	-	-	-	-	-	-	-	-	-	NA	0	NA	0	NA	0
889		Feature_-_228.9312_17.5	228.931	-	228.931	0	17.52	0.47	0	-	-	-	-	-	-	-	-	-	-	-	-	1	0	1	0	1	0
890		Feature_-_228.9312_20.9	228.931	-	228.931	-0.4	21.07	0.24	0	-	-	-	-	-	-	-	-	-	-	-	-	NA	0	NA	0	NA	0
891		Feature_-_228.9312_21.5	228.931	-	228.931	0	21.79	0.05	0	-	-	-	-	-	-	-	-	-	-	-	-	NA	0	NA	0	NA	0
892		Feature_-_228.9312_21.8	228.931	-	228.931	0.4	22.06	0.14	0	-	-	-	-	-	-	-	-	-	-	-	-	NA	0	NA	0	NA	0
153		Feature_-_665.7779_22.8	665.778	-	665.778	0	22.83	0.25	12	1099308	1064276	1321962	1046566	940936	985700	1042485	1205521	1096790	1251342	1289186	1422154	0.0441388	-0.293289	0.161431	-0.20709	0.0201871	0.337076	1.69493	1.35518	0.792014
734		Feature_-_278.8519_23.5	278.852	-	278.852	0	23.46	0.12	12	211352	248775	307053	261997	230701	193829	263106	305799	244326	298694	324708	310959	0.162671	-0.2928	0.112729	-0.192188	0.00244951	0.444975	2.61092	0.78869	0.947963
5437		Feature_+_96.9280_24.3	96.928	+	96.928	0	24.08	0.05	12	933279	830170	1239469	960757	733782	910829	969480	794126	1024383	902618	1574612	798150	0.465688	-0.292428	0.778635	-0.112156	0.49253	0.283282	0.307567	0.331905	0.108666
896		Feature_-_228.9312_23.9	228.931	-	228.931	0	23.71	0.03	0	-	-	-	-	-	-	-	-	-	-	-	-	NA	0	NA	0	NA	0
897		Feature_-_228.9312_24.5	228.931	-	228.931	-0.4	24.28	0.25	0	-	-	-	-	-	-	-	-	-	-	-	-	NA	0	NA	0	NA	0
898		Feature_-_228.9312_25.6	228.931	-	228.931	0	25.35	0.25	0	-	-	-	-	-	-	-	-	-	-	-	-	1	0	1	0	1	0
899		Feature_-_228.9312_26.0	228.931	-	228.931	-1.7	25.8	0.28	0	-	-	-	-	-	-	-	-	-	-	-	-	NA	0	NA	0	NA	0
900		Feature_-_228.9312_26.3	228.931	-	228.931	-1.3	26.04	0.22	0	-	-	-	-	-	-	-	-	-	-	-	-	NA	0	NA	0	NA	0
901		Feature_-_228.9311_8.9	228.931	-	228.931	-0.4	8.97	0.39	0	-	-	-	-	-	-	-	-	-	-	-	-	NA	0	NA	0	NA	0
902		Feature_-_228.9311_9.2	228.931	-	228.931	-0.9	9.42	0.26	0	-	-	-	-	-	-	-	-	-	-	-	-	NA	0	NA	0	NA	0
903		Feature_-_228.9311_11.5	228.931	-	228.931	0.4	11.55	0.41	0	-	-	-	-	-	-	-	-	-	-	-	-	NA	0	NA	0	NA	0
904		Feature_-_228.9311_12.1	228.931	-	228.931	0	12.06	0.31	0	-	-	-	-	-	-	-	-	-	-	-	-	NA	0	NA	0	NA	0
905		Feature_-_228.9311_13.5	228.931	-	228.931	0	13.47	0.49	0	-	-	-	-	-	-	-	-	-	-	-	-	NA	0	NA	0	NA	0
906		Feature_-_228.9311_15.3	228.931	-	228.931	-0.9	15.51	0.19	0	-	-	-	-	-	-	-	-	-	-	-	-	NA	0	NA	0	NA	0
907		Feature_-_228.9311_15.6	228.931	-	228.931	-0.4	15.81	0.21	0	-	-	-	-	-	-	-	-	-	-	-	-	1	0	1	0	1	0
908		Feature_-_228.9311_16.5	228.931	-	228.931	0	16.52	0.41	0	-	-	-	-	-	-	-	-	-	-	-	-	NA	0	NA	0	NA	0
909		Feature_-_228.9311_17.9	228.931	-	228.931	0	17.7	0.3	0	-	-	-	-	-	-	-	-	-	-	-	-	NA	0	NA	0	NA	0
910		Feature_-_228.9311_18.8	228.931	-	228.931	0	18.81	0.43	0	-	-	-	-	-	-	-	-	-	-	-	-	NA	0	NA	0	NA	0
911		Feature_-_228.9311_19.9	228.931	-	228.931	-0.9	19.83	0.29	0	-	-	-	-	-	-	-	-	-	-	-	-	NA	0	NA	0	NA	0
912		Feature_-_228.9311_22.1	228.931	-	228.931	0.4	22.33	0.24	0	-	-	-	-	-	-	-	-	-	-	-	-	NA	0	NA	0	NA	0
10678		Feature_+_718.7921_22.9	718.792	+	718.792	0	22.88	0.38	12	93975	97522	89697	101295	82615	64711	110736	102653	97612	118683	113166	108660	0.224186	-0.292089	0.0180067	-0.239052	0.0146295	0.312454	1.83477	0.649391	1.74456
914		Feature_-_228.9311_24.2	228.931	-	228.931	0	24.21	0.26	0	-	-	-	-	-	-	-	-	-	-	-	-	NA	0	NA	0	NA	0
915		Feature_-_228.9311_24.8	228.931	-	228.931	-0.4	24.67	0.36	0	-	-	-	-	-	-	-	-	-	-	-	-	NA	0	NA	0	NA	0
916		Feature_-_228.9311_25.2	228.931	-	228.931	0	25.21	0.43	0	-	-	-	-	-	-	-	-	-	-	-	-	NA	0	NA	0	NA	0
917		Feature_-_228.9311_27.6	228.931	-	228.931	-0.9	27.4	0.26	0	-	-	-	-	-	-	-	-	-	-	-	-	NA	0	NA	0	NA	0
918		Feature_-_228.9311_28.1	228.931	-	228.931	0	28.11	0.46	0	-	-	-	-	-	-	-	-	-	-	-	-	NA	0	NA	0	NA	0
919		Feature_-_228.9310_9.7	228.931	-	228.931	0	9.66	0.37	0	-	-	-	-	-	-	-	-	-	-	-	-	NA	0	NA	0	NA	0
920		Feature_-_228.9310_10.8	228.931	-	228.931	1.7	10.86	0.26	0	-	-	-	-	-	-	-	-	-	-	-	-	NA	0	NA	0	NA	0
921		Feature_-_228.9310_11.8	228.931	-	228.931	0	11.99	0.25	0	-	-	-	-	-	-	-	-	-	-	-	-	1	0	1	0	1	0
922		Feature_-_228.9310_12.5	228.931	-	228.931	0	12.53	0.38	0	-	-	-	-	-	-	-	-	-	-	-	-	NA	0	NA	0	NA	0
923		Feature_-_228.9310_14.5	228.931	-	228.931	-0.9	14.34	0.1	0	-	-	-	-	-	-	-	-	-	-	-	-	NA	0	NA	0	NA	0
924		Feature_-_228.9310_15.9	228.931	-	228.931	0.9	16.09	0.24	0	-	-	-	-	-	-	-	-	-	-	-	-	NA	0	NA	0	NA	0
925		Feature_-_228.9310_18.2	228.931	-	228.931	0	18.2	0.44	0	-	-	-	-	-	-	-	-	-	-	-	-	1	0	1	0	1	0
926		Feature_-_228.9310_19.6	228.931	-	228.931	0.4	19.43	0.24	0	-	-	-	-	-	-	-	-	-	-	-	-	NA	0	NA	0	NA	0
927		Feature_-_228.9310_20.4	228.931	-	228.931	0	20.38	0.48	0	-	-	-	-	-	-	-	-	-	-	-	-	1	0	1	0	1	0
928		Feature_-_228.9310_21.2	228.931	-	228.931	0.4	21.44	0.14	0	-	-	-	-	-	-	-	-	-	-	-	-	1	0	1	0	1	0
929		Feature_-_228.9310_23.7	228.931	-	228.931	0.9	23.44	0.15	0	-	-	-	-	-	-	-	-	-	-	-	-	NA	0	NA	0	NA	0
930		Feature_-_228.9310_26.9	228.931	-	228.931	0	26.76	0.26	0	-	-	-	-	-	-	-	-	-	-	-	-	NA	0	NA	0	NA	0
931		Feature_-_228.9309_13.1	228.931	-	228.931	0	13.14	0.48	0	-	-	-	-	-	-	-	-	-	-	-	-	NA	0	NA	0	NA	0
932		Feature_-_228.9309_16.8	228.931	-	228.931	0.4	16.62	0.31	0	-	-	-	-	-	-	-	-	-	-	-	-	NA	0	NA	0	NA	0
933		Feature_-_228.9309_18.5	228.931	-	228.931	1.7	18.38	0.32	0	-	-	-	-	-	-	-	-	-	-	-	-	NA	0	NA	0	NA	0
934		Feature_-_228.9309_19.3	228.931	-	228.931	0	19.26	0.39	0	-	-	-	-	-	-	-	-	-	-	-	-	1	0	1	0	1	0
935		Feature_-_228.9309_26.6	228.931	-	228.931	0	26.63	0.43	0	-	-	-	-	-	-	-	-	-	-	-	-	NA	0	NA	0	NA	0
936		Feature_-_228.9308_27.3	228.931	-	228.931	0	27.29	0.45	0	-	-	-	-	-	-	-	-	-	-	-	-	NA	0	NA	0	NA	0
937		Feature_-_228.9307_8.6	228.931	-	228.931	0	8.57	0.46	0	-	-	-	-	-	-	-	-	-	-	-	-	NA	0	NA	0	NA	0
279		Feature_-_515.8494_22.6	515.849	-	515.849	1	22.83	0.11	12	429007	435753	407397	317004	222891	360752	346535	413174	350656	483913	422150	465777	0.0374111	-0.29202	0.154251	-0.241796	0.121547	0.452432	0.915257	1.427	0.811771
10510		Feature_+_552.8077_22.6	552.808	+	552.808	2.5	22.81	0.17	12	855148	789476	898331	925132	762237	749719	898398	738518	898760	1025321	926679	969473	0.0389273	-0.291718	0.110669	-0.161023	0.0520511	0.215481	1.28357	1.40975	0.955973
2499		Feature_-_125.9455_10.6	125.945	-	125.945	0	10.62	0.11	12	74663	74706	109486	99710	86351	90033	70811	98840	81093	107924	103080	106814	0.082413	-0.291444	0.340552	-0.162808	0.00237571	0.392556	2.62421	1.084	0.467816
941		Feature_-_227.9821_3.3	227.982	-	227.982	0	3.26	0.08	0	-	-	-	-	-	-	-	-	-	-	-	-	NA	0	NA	0	NA	0
10715		Feature_+_769.8109_23.0	769.811	+	769.811	0	22.98	0.39	12	282893	260102	340333	253481	217351	261828	225984	232607	250471	326062	285950	269488	0.0556324	-0.291124	0.791769	-0.0458664	0.160004	0.231695	0.795869	1.25467	0.101402
943		Feature_-_227.1215_2.9	227.121	-	227.121	0	2.88	0.11	0	-	-	-	-	-	-	-	-	-	-	-	-	NA	0	NA	0	NA	0
944		Feature_-_227.0704_3.1	227.07	-	227.07	0	3.13	0.1	0	-	-	-	-	-	-	-	-	-	-	-	-	1	0	1	0	1	0
945		Feature_-_222.9144_9.0	222.914	-	222.914	-1.8	9.15	0.32	0	-	-	-	-	-	-	-	-	-	-	-	-	NA	0	NA	0	NA	0
946		Feature_-_222.9144_13.5	222.914	-	222.914	-0.4	13.72	0.24	0	-	-	-	-	-	-	-	-	-	-	-	-	NA	0	NA	0	NA	0
947		Feature_-_222.9144_17.7	222.914	-	222.914	-0.9	17.47	0.21	0	-	-	-	-	-	-	-	-	-	-	-	-	NA	0	NA	0	NA	0
948		Feature_-_222.9144_19.3	222.914	-	222.914	0	19.32	0.46	0	-	-	-	-	-	-	-	-	-	-	-	-	NA	0	NA	0	NA	0
949		Feature_-_222.9143_12.9	222.914	-	222.914	0	12.86	0.48	0	-	-	-	-	-	-	-	-	-	-	-	-	NA	0	NA	0	NA	0
950		Feature_-_222.9143_13.9	222.914	-	222.914	0	13.87	0.42	0	-	-	-	-	-	-	-	-	-	-	-	-	1	0	1	0	1	0
951		Feature_-_222.9143_14.1	222.914	-	222.914	0	14.04	0.28	0	-	-	-	-	-	-	-	-	-	-	-	-	1	0	1	0	1	0
952		Feature_-_222.9143_15.5	222.914	-	222.914	-0.4	15.62	0.24	0	-	-	-	-	-	-	-	-	-	-	-	-	NA	0	NA	0	NA	0
953		Feature_-_222.9143_16.1	222.914	-	222.914	0	16.09	0.38	0	-	-	-	-	-	-	-	-	-	-	-	-	NA	0	NA	0	NA	0
954		Feature_-_222.9143_16.6	222.914	-	222.914	0	16.56	0.48	0	-	-	-	-	-	-	-	-	-	-	-	-	1	0	1	0	1	0
955		Feature_-_222.9143_17.0	222.914	-	222.914	-0.4	17.2	0.33	0	-	-	-	-	-	-	-	-	-	-	-	-	1	0	1	0	1	0
956		Feature_-_222.9143_17.9	222.914	-	222.914	0	17.94	0.48	0	-	-	-	-	-	-	-	-	-	-	-	-	NA	0	NA	0	NA	0
957		Feature_-_222.9143_18.3	222.914	-	222.914	0	18.33	0.49	0	-	-	-	-	-	-	-	-	-	-	-	-	1	0	1	0	1	0
958		Feature_-_222.9143_18.8	222.914	-	222.914	0	18.79	0.47	0	-	-	-	-	-	-	-	-	-	-	-	-	NA	0	NA	0	NA	0
959		Feature_-_222.9143_20.0	222.914	-	222.914	0	19.95	0.48	0	-	-	-	-	-	-	-	-	-	-	-	-	1	0	1	0	1	0
960		Feature_-_222.9143_20.3	222.914	-	222.914	-0.4	20.43	0.33	0	-	-	-	-	-	-	-	-	-	-	-	-	1	0	1	0	1	0
961		Feature_-_222.9143_20.6	222.914	-	222.914	0	20.61	0.45	0	-	-	-	-	-	-	-	-	-	-	-	-	NA	0	NA	0	NA	0
962		Feature_-_222.9143_21.0	222.914	-	222.914	0	21.02	0.49	0	-	-	-	-	-	-	-	-	-	-	-	-	NA	0	NA	0	NA	0
963		Feature_-_222.9143_21.6	222.914	-	222.914	0	21.55	0.34	0	-	-	-	-	-	-	-	-	-	-	-	-	1	0	1	0	1	0
964		Feature_-_222.9143_23.0	222.914	-	222.914	-1.3	22.74	0.22	0	-	-	-	-	-	-	-	-	-	-	-	-	NA	0	NA	0	NA	0
965		Feature_-_222.9143_25.3	222.914	-	222.914	0	25.29	0.46	0	-	-	-	-	-	-	-	-	-	-	-	-	NA	0	NA	0	NA	0
966		Feature_-_222.9143_26.4	222.914	-	222.914	0	26.45	0.48	0	-	-	-	-	-	-	-	-	-	-	-	-	1	0	1	0	1	0
967		Feature_-_222.9143_27.3	222.914	-	222.914	0	27.39	0.34	0	-	-	-	-	-	-	-	-	-	-	-	-	NA	0	NA	0	NA	0
968		Feature_-_222.9143_27.6	222.914	-	222.914	0	27.59	0.43	0	-	-	-	-	-	-	-	-	-	-	-	-	NA	0	NA	0	NA	0
969		Feature_-_222.9143_28.3	222.914	-	222.914	0	28.29	0.42	0	-	-	-	-	-	-	-	-	-	-	-	-	NA	0	NA	0	NA	0
970		Feature_-_222.9143_29.0	222.914	-	222.914	0	29.05	0.3	0	-	-	-	-	-	-	-	-	-	-	-	-	NA	0	NA	0	NA	0
971		Feature_-_222.9143_29.3	222.914	-	222.914	0	29.26	0.45	0	-	-	-	-	-	-	-	-	-	-	-	-	NA	0	NA	0	NA	0
972		Feature_-_222.9142_11.6	222.914	-	222.914	-0.4	11.71	0.19	0	-	-	-	-	-	-	-	-	-	-	-	-	NA	0	NA	0	NA	0
973		Feature_-_222.9142_12.5	222.914	-	222.914	0	12.53	0.38	0	-	-	-	-	-	-	-	-	-	-	-	-	1	0	1	0	1	0
974		Feature_-_222.9142_13.1	222.914	-	222.914	0	13.29	0.32	0	-	-	-	-	-	-	-	-	-	-	-	-	NA	0	NA	0	NA	0
975		Feature_-_222.9142_14.4	222.914	-	222.914	0.4	14.26	0.08	0	-	-	-	-	-	-	-	-	-	-	-	-	NA	0	NA	0	NA	0
976		Feature_-_222.9142_14.7	222.914	-	222.914	0	14.49	0.25	0	-	-	-	-	-	-	-	-	-	-	-	-	NA	0	NA	0	NA	0
977		Feature_-_222.9142_15.2	222.914	-	222.914	0	15.41	0.16	0	-	-	-	-	-	-	-	-	-	-	-	-	NA	0	NA	0	NA	0
978		Feature_-_222.9142_15.8	222.914	-	222.914	0.4	15.97	0.28	0	-	-	-	-	-	-	-	-	-	-	-	-	NA	0	NA	0	NA	0
979		Feature_-_222.9142_17.3	222.914	-	222.914	0	17.3	0.42	0	-	-	-	-	-	-	-	-	-	-	-	-	NA	0	NA	0	NA	0
980		Feature_-_222.9142_19.6	222.914	-	222.914	0.9	19.46	0.29	0	-	-	-	-	-	-	-	-	-	-	-	-	NA	0	NA	0	NA	0
981		Feature_-_222.9142_21.3	222.914	-	222.914	0.4	21.24	0.43	0	-	-	-	-	-	-	-	-	-	-	-	-	NA	0	NA	0	NA	0
982		Feature_-_222.9142_22.0	222.914	-	222.914	-0.4	21.76	0.25	0	-	-	-	-	-	-	-	-	-	-	-	-	NA	0	NA	0	NA	0
983		Feature_-_222.9142_22.7	222.914	-	222.914	0	22.72	0.21	0	-	-	-	-	-	-	-	-	-	-	-	-	NA	0	NA	0	NA	0
984		Feature_-_222.9142_23.6	222.914	-	222.914	0	23.62	0.3	0	-	-	-	-	-	-	-	-	-	-	-	-	NA	0	NA	0	NA	0
985		Feature_-_222.9142_26.2	222.914	-	222.914	0	26.29	0.33	0	-	-	-	-	-	-	-	-	-	-	-	-	NA	0	NA	0	NA	0
986		Feature_-_222.9142_26.9	222.914	-	222.914	0	26.94	0.49	0	-	-	-	-	-	-	-	-	-	-	-	-	1	0	1	0	1	0
987		Feature_-_222.9142_27.9	222.914	-	222.914	0.9	27.66	0.29	0	-	-	-	-	-	-	-	-	-	-	-	-	NA	0	NA	0	NA	0
988		Feature_-_222.9142_28.6	222.914	-	222.914	0	28.54	0.46	0	-	-	-	-	-	-	-	-	-	-	-	-	1	0	1	0	1	0
989		Feature_-_222.9142_29.9	222.914	-	222.914	0	29.87	0.33	0	-	-	-	-	-	-	-	-	-	-	-	-	NA	0	NA	0	NA	0
990		Feature_-_222.9141_9.3	222.914	-	222.914	0	9.31	0.27	0	-	-	-	-	-	-	-	-	-	-	-	-	NA	0	NA	0	NA	0
991		Feature_-_222.9141_9.6	222.914	-	222.914	0.4	9.82	0.28	0	-	-	-	-	-	-	-	-	-	-	-	-	NA	0	NA	0	NA	0
992		Feature_-_222.9141_10.3	222.914	-	222.914	1.3	10.56	0.08	0	-	-	-	-	-	-	-	-	-	-	-	-	1	0	1	0	1	0
993		Feature_-_222.9141_11.0	222.914	-	222.914	0	10.98	0.32	0	-	-	-	-	-	-	-	-	-	-	-	-	NA	0	NA	0	NA	0
994		Feature_-_222.9141_11.3	222.914	-	222.914	0.4	11.47	0.31	0	-	-	-	-	-	-	-	-	-	-	-	-	NA	0	NA	0	NA	0
995		Feature_-_222.9141_11.9	222.914	-	222.914	0.4	12.06	0.18	0	-	-	-	-	-	-	-	-	-	-	-	-	1	0	1	0	1	0
996		Feature_-_222.9141_12.2	222.914	-	222.914	0	12.19	0.31	0	-	-	-	-	-	-	-	-	-	-	-	-	1	0	1	0	1	0
997		Feature_-_222.9141_19.1	222.914	-	222.914	0.9	19.25	0.26	0	-	-	-	-	-	-	-	-	-	-	-	-	1	0	1	0	1	0
998		Feature_-_222.9141_22.3	222.914	-	222.914	0.4	22.16	0.25	0	-	-	-	-	-	-	-	-	-	-	-	-	NA	0	NA	0	NA	0
999		Feature_-_222.9141_24.1	222.914	-	222.914	0.4	24.26	0.12	0	-	-	-	-	-	-	-	-	-	-	-	-	1	0	1	0	1	0
1000		Feature_-_222.9141_24.4	222.914	-	222.914	0	24.46	0.2	0	-	-	-	-	-	-	-	-	-	-	-	-	1	0	1	0	1	0
1001		Feature_-_222.9141_24.7	222.914	-	222.914	0	24.67	0.28	0	-	-	-	-	-	-	-	-	-	-	-	-	NA	0	NA	0	NA	0
1002		Feature_-_222.9141_25.0	222.914	-	222.914	0.9	25.2	0.25	0	-	-	-	-	-	-	-	-	-	-	-	-	1	0	1	0	1	0
1003		Feature_-_222.9141_25.7	222.914	-	222.914	0	25.66	0.34	0	-	-	-	-	-	-	-	-	-	-	-	-	NA	0	NA	0	NA	0
1004		Feature_-_222.9141_29.5	222.914	-	222.914	0	29.53	0.46	0	-	-	-	-	-	-	-	-	-	-	-	-	NA	0	NA	0	NA	0
1005		Feature_-_222.9140_9.9	222.914	-	222.914	0	9.94	0.34	0	-	-	-	-	-	-	-	-	-	-	-	-	1	0	1	0	1	0
1006		Feature_-_222.9140_10.7	222.914	-	222.914	0.4	10.95	0.24	0	-	-	-	-	-	-	-	-	-	-	-	-	NA	0	NA	0	NA	0
1007		Feature_-_222.9140_23.4	222.914	-	222.914	0.9	23.55	0.3	0	-	-	-	-	-	-	-	-	-	-	-	-	NA	0	NA	0	NA	0
1008		Feature_-_222.9140_23.9	222.914	-	222.914	0.4	24.1	0.23	0	-	-	-	-	-	-	-	-	-	-	-	-	NA	0	NA	0	NA	0
484		Feature_-_367.7538_22.9	367.754	-	367.754	0	22.87	0.21	12	106173	60966	114566	82497	80075	81558	75014	96193	61745	112260	98866	98027	0.0729719	-0.290524	0.353252	-0.260788	0.210688	0.318022	0.676361	1.13684	0.451915
10644		Feature_+_698.7676_22.8	698.768	+	698.768	0	22.85	0.45	12	151319	119182	151125	142443	128045	135513	140343	142928	159475	205647	155213	151283	0.152432	-0.29034	0.171811	-0.311278	0.286295	0.222855	0.543187	0.816925	0.764949
10788		Feature_+_906.7733_23.1	906.773	+	906.773	-0.3	22.92	0.25	12	216656	198051	322078	253841	207508	255960	241780	186387	180860	261709	324793	249930	0.182051	-0.289984	0.651614	-0.111971	0.0394362	0.467256	1.4041	0.739806	0.186009
820		Feature_-_248.0792_2.7	248.079	-	248.079	0	2.67	0.19	4	-	-	-	-	-	-	98366	103510	165008	182418	-	-	0.567014	-0.289479	0.373901	-0.487522	0.899406	0.0740893	0.0460442	0.246406	0.427243
19		Feature_-_897.7003_23.1	897.7	-	897.7	0.3	22.93	0.31	12	162612	126807	214441	176047	232221	177899	177950	151358	207891	266114	171549	182209	0.294904	-0.289396	0.432415	-0.260983	0.882175	0.0404728	0.054445	0.530319	0.364099
2361		Feature_-_142.9719_10.5	142.972	-	142.972	0	10.53	0.13	12	482561	433965	518419	540321	389074	415325	445972	556996	481879	575005	646546	511526	0.145106	-0.28918	0.189304	-0.215407	0.0641161	0.356626	1.19303	0.838315	0.72284
1329		Feature_-_182.9752_23.3	182.975	-	182.975	0	23.31	0.1	12	111022	111832	128246	102992	94303	107242	87782	113091	99271	141793	107904	126632	0.141421	-0.288526	0.417686	-0.133491	0.0950571	0.305097	1.02202	0.849485	0.37915
10707		Feature_+_758.8193_23.1	758.819	+	758.819	1.8	22.91	0.25	12	432028	322022	419223	416235	468954	403165	426553	407332	380828	539025	496515	474737	0.0107594	-0.287909	0.0338067	-0.383826	0.0745778	0.236631	1.12739	1.96821	1.471
9886		Feature_+_260.8571_23.6	260.857	+	260.857	0	23.44	0.06	12	2817287	2594072	3277115	2787074	2323878	2282395	2693974	2904113	2266943	3304831	3428157	2886996	0.0773109	-0.287751	0.286748	-0.151957	0.0369728	0.376929	1.43212	1.11176	0.542499
10524		Feature_+_570.8448_23.1	570.845	+	570.845	2.1	22.91	0.25	12	1158971	1053598	1091372	877290	1064556	854598	850599	825802	1089555	1097901	1013321	977932	0.0071405	-0.287505	0.78092	-0.031584	0.175752	-0.100962	0.755099	2.14627	0.107394
10292		Feature_+_364.3571_2.5	364.357	+	364.357	0	2.53	0.14	3	-	-	-	106395	114961	-	-	-	-	19608	-	-	0.373901	-0.286196	0.412146	1.588	0.408749	-1.68003	0.388544	0.427243	0.384949
97		Feature_-_739.7585_22.8	739.759	-	739.759	0	22.83	0.39	12	86266	51467	110116	139411	92062	30621	112843	96040	47774	65548	95399	131108	0.607068	-0.28619	0.930411	0.0434946	0.402501	0.369266	0.395233	0.216763	0.0313252
1021		Feature_-_219.1749_0.3	219.175	-	219.175	0	0.34	0.33	0	-	-	-	-	-	-	-	-	-	-	-	-	NA	0	NA	0	NA	0
1022		Feature_-_219.1749_1.4	219.175	-	219.175	0	1.38	0.48	0	-	-	-	-	-	-	-	-	-	-	-	-	NA	0	NA	0	NA	0
1023		Feature_-_219.1749_23.1	219.175	-	219.175	0	22.89	0.25	0	-	-	-	-	-	-	-	-	-	-	-	-	NA	0	NA	0	NA	0
1024		Feature_-_219.1747_2.7	219.175	-	219.175	0	2.69	0.28	0	-	-	-	-	-	-	-	-	-	-	-	-	NA	0	NA	0	NA	0
1025		Feature_-_219.1745_2.0	219.174	-	219.174	0	2.04	0.49	0	-	-	-	-	-	-	-	-	-	-	-	-	NA	0	NA	0	NA	0
1026		Feature_-_219.1745_22.9	219.174	-	219.174	0	22.86	0.44	0	-	-	-	-	-	-	-	-	-	-	-	-	NA	0	NA	0	NA	0
1027		Feature_-_219.1744_0.9	219.174	-	219.174	0	0.89	0.37	0	-	-	-	-	-	-	-	-	-	-	-	-	NA	0	NA	0	NA	0
1028		Feature_-_219.1744_3.5	219.174	-	219.174	0	3.52	0.47	0	-	-	-	-	-	-	-	-	-	-	-	-	NA	0	NA	0	NA	0
1029		Feature_-_219.1744_14.9	219.174	-	219.174	0	14.94	0.18	0	-	-	-	-	-	-	-	-	-	-	-	-	NA	0	NA	0	NA	0
1030		Feature_-_219.1742_0.6	219.174	-	219.174	2.3	0.51	0.38	0	-	-	-	-	-	-	-	-	-	-	-	-	NA	0	NA	0	NA	0
1031		Feature_-_219.1741_22.6	219.174	-	219.174	1.4	22.68	0.22	0	-	-	-	-	-	-	-	-	-	-	-	-	NA	0	NA	0	NA	0
8192		Feature_+_165.0877_13.4	165.088	+	165.088	0	13.64	0.24	12	1720403	1720100	1731631	1741401	1655820	1645622	1464236	1386772	1672927	1771755	1955657	1747295	0.032069	-0.283938	0.228326	-0.0761769	0.107262	0.116741	0.969552	1.49391	0.641445
10724		Feature_+_782.7755_22.8	782.775	+	782.775	0	22.81	0.33	12	210146	171565	173430	194537	183198	163132	150034	188590	186097	234571	195387	180876	0.137618	-0.283794	0.249296	-0.179072	0.595507	0.0761186	0.225113	0.861326	0.603284
1034		Feature_-_218.9043_14.9	218.904	-	218.904	0	14.92	0.14	0	-	-	-	-	-	-	-	-	-	-	-	-	NA	0	NA	0	NA	0
7516		Feature_+_146.9312_23.3	146.931	+	146.931	0	23.28	0.11	12	146691	128908	218938	155656	116140	115574	126530	130150	135622	159368	158692	134886	0.0426181	-0.283052	0.578165	0.152658	0.205366	0.18493	0.687471	1.37041	0.237948
8212		Feature_+_165.0881_22.6	165.088	+	165.088	-1.8	22.45	0.31	12	106599	78872	109136	100647	107418	94394	84619	97156	112599	121786	123696	90337	0.157882	-0.282132	0.326673	-0.218338	0.79375	0.0400884	0.100316	0.801667	0.485887
10583		Feature_+_628.7352_23.4	628.735	+	628.735	0	23.36	0.11	12	99543	79015	129011	110797	62069	59424	80346	129508	86488	106187	106914	114275	0.407229	-0.281852	0.856966	-0.0381929	0.0791848	0.400027	1.10136	0.390161	0.0670363
7341	Sodium Cluster Adduct	Feature_+_144.9271_23.3	144.927	+	144.927	0	23.28	0.28	12	43787448	41036160	52593160	44206400	34164504	38695240	38380912	41787680	38784584	48903668	46609300	48978128	0.00307525	-0.281671	0.564249	-0.0680308	0.032702	0.307724	1.48543	2.51212	0.248529
726		Feature_-_282.8869_23.4	282.887	-	282.887	0	23.36	0.28	12	880440	763526	978439	812566	662026	682534	754464	1005259	822430	985874	956818	1025876	0.153733	-0.281552	0.112401	-0.216709	0.0421621	0.32799	1.37508	0.813234	0.949228
10475		Feature_+_524.7666_23.5	524.767	+	524.767	0	23.47	0.2	12	126714	122431	142044	156284	93089	106671	149907	122045	134806	152413	160465	147248	0.10916	-0.281267	0.28109	-0.129035	0.0577709	0.3758	1.23829	0.961936	0.551154
320		Feature_-_476.7284_23.6	476.728	-	476.728	0	23.62	0.16	12	140354	116929	115736	117825	128615	102110	119974	130992	113564	134480	158877	135713	0.0936802	-0.281234	0.0301728	-0.29184	0.234578	0.165629	0.629712	1.02835	1.52038
1042		Feature_-_216.9088_15.1	216.909	-	216.909	-0.9	14.99	0.11	0	-	-	-	-	-	-	-	-	-	-	-	-	NA	0	NA	0	NA	0
1043		Feature_-_216.9086_14.9	216.909	-	216.909	0	14.88	0.13	0	-	-	-	-	-	-	-	-	-	-	-	-	1	0	1	0	1	0
4096		Feature_-_87.0074_10.7	87.0074	-	87.0074	0	10.72	0.34	12	152391	132558	163025	162591	93897	141684	131753	138478	141299	183332	153363	163872	0.0331103	-0.281217	0.350158	-0.127668	0.132394	0.369043	0.87813	1.48004	0.455736
1045		Feature_-_215.0092_0.1	215.009	-	215.009	0	0.15	0.08	0	-	-	-	-	-	-	-	-	-	-	-	-	NA	0	NA	0	NA	0
1046		Feature_-_215.0089_0.4	215.009	-	215.009	0.9	0.17	0.06	0	-	-	-	-	-	-	-	-	-	-	-	-	1	0	1	0	1	0
198		Feature_-_613.2997_22.9	613.3	-	613.3	0	22.86	0.4	12	420624	203939	283000	291975	216550	166459	174109	224265	246642	220016	233463	232893	0.0956002	-0.281166	0.337158	0.182473	0.360265	-0.364755	0.443377	1.01954	0.472167
1048		Feature_-_213.9632_3.4	213.963	-	213.963	0	3.41	0.09	0	-	-	-	-	-	-	-	-	-	-	-	-	1	0	1	0	1	0
10647		Feature_+_698.7903_23.1	698.79	+	698.79	-0.1	22.91	0.25	12	264547	242750	282667	280971	226856	277677	227202	259147	259557	313476	286059	328097	0.0469379	-0.279931	0.0873122	-0.202078	0.026076	0.304817	1.58376	1.32848	1.05892
3081		Feature_-_101.0027_23.3	101.003	-	101.003	0	23.08	0.2	12	455445	400779	450609	452183	431908	327757	400078	510018	460644	523590	529881	449167	0.208911	-0.279657	0.0985013	-0.205028	0.132937	0.15668	0.876354	0.68004	1.00656
720		Feature_-_283.2638_2.6	283.264	-	283.264	0	2.56	0.17	6	-	-	-	789705	1783947	-	-	349203	427797	439080	373668	-	0.309839	-0.279564	0.666776	0.298402	0.388525	-1.19487	0.410581	0.508864	0.17602
737		Feature_-_276.8532_23.4	276.853	-	276.853	0	23.42	0.11	12	1761896	2049400	2541598	2043698	1483247	1547759	1837930	2262502	1814789	2527902	2098809	2226474	0.174275	-0.278986	0.744316	-0.0467443	0.0216905	0.437657	1.66373	0.758764	0.128243
694		Feature_-_294.9030_22.4	294.903	-	294.903	0	22.66	0.25	12	22224620	21319792	26449108	25523486	12486201	20353738	18242744	26989340	18497286	29941200	20204182	29420342	0.32088	-0.278763	0.585907	-0.118484	0.107469	0.580501	0.968718	0.493657	0.232171
10651		Feature_+_705.8371_22.6	705.837	+	705.837	1.4	22.82	0.26	12	535392	471943	618588	410721	460601	464981	513818	438068	451835	576487	562991	579379	0.0114481	-0.278745	0.30616	-0.195283	0.0286382	0.247559	1.54305	1.94126	0.514052
10557		Feature_+_610.8633_22.8	610.863	+	610.863	0	22.84	0.3	12	2379666	2131071	2262919	2217888	2127124	2130918	2051202	2251598	2222665	2675840	2410464	2717588	0.0153242	-0.278541	0.0185728	-0.239134	0.0416774	0.213704	1.3801	1.81462	1.73112
10672		Feature_+_716.8286_22.6	716.829	+	716.829	-1.7	22.81	0.27	12	1758014	1231121	1710926	1652152	1405181	1332644	1401047	1512252	1379135	1766024	1683197	1700734	0.00657174	-0.278475	0.293114	-0.164746	0.179802	0.181127	0.745205	2.18232	0.532963
155		Feature_-_663.8033_23.0	663.803	-	663.803	3.3	22.8	0.26	12	114656	158912	157367	167146	156262	156114	144235	120222	140272	139335	202988	167754	0.232483	-0.278366	0.658819	-0.077423	0.209092	0.31091	0.679663	0.633609	0.181234
446		Feature_-_384.8423_23.4	384.842	-	384.842	0	23.42	0.43	12	78887	63854	64308	97379	58943	72929	60164	84302	54729	86468	75925	101130	0.202591	-0.27761	0.394716	-0.224539	0.0860557	0.452628	1.06522	0.693379	0.403715
7744		Feature_+_151.0964_4.3	151.096	+	151.096	-2	4.03	0.03	1	-	-	-	-	3077269	-	-	-	-	-	-	-	1	0	1	0	0.373901	-0.328345
499		Feature_-_358.7989_23.7	358.799	-	358.799	0	23.5	0.06	12	791245	771259	1012449	771739	693276	731363	828393	757032	810378	917970	959742	930290	0.00657044	-0.277418	0.358762	-0.135968	0.0111386	0.291113	1.95317	2.18241	0.445194
1108		Feature_-_204.9126_23.3	204.913	-	204.913	0	23.3	0.28	12	13598472	11943792	17045894	14124850	10175593	11455747	12921684	13509421	11874863	16069113	15362851	14475558	0.0250257	-0.277033	0.580039	-0.0905562	0.0349773	0.364872	1.45621	1.60161	0.236543
1062		Feature_-_209.9483_7.5	209.948	-	209.948	0	7.46	0.12	0	-	-	-	-	-	-	-	-	-	-	-	-	NA	0	NA	0	NA	0
9789		Feature_+_236.1123_2.7	236.112	+	236.112	0	2.73	0.06	6	-	-	-	951084	-	365532	474661	1333724	-	884798	-	1424454	0.745616	-0.276929	0.41591	-0.718729	0.156347	1.43511	0.805912	0.127485	0.381001
10207		Feature_+_331.2160_2.7	331.216	+	331.216	0	2.74	0.1	2	-	-	-	2614055	2897596	-	-	-	-	-	-	-	NA	0	0.373901	0.0437922	0.373901	-0.0980405
715		Feature_-_286.9111_10.1	286.911	-	286.911	0	10.1	0.13	12	313157	289178	302177	306762	274309	238358	307501	176439	236033	237994	362031	274734	0.390158	-0.276291	0.844274	0.0380178	0.711375	0.0871187	0.147902	0.408759	0.0735165
171		Feature_-_643.7960_22.7	643.796	-	643.796	-1.6	22.83	0.23	12	160750	153210	146317	113245	155797	109476	135605	149804	149195	152075	163632	162014	0.0890467	-0.274736	0.167379	-0.210823	0.462984	0.0366373	0.334434	1.05038	0.776299
7942		Feature_+_161.9044_23.4	161.904	+	161.904	0	23.38	0.1	12	239137	197760	285672	292543	230189	224595	254403	252822	262657	301081	297519	286040	0.00888255	-0.273602	0.305469	-0.18908	0.00891309	0.27328	2.04997	2.05146	0.515033
349		Feature_-_453.8488_23.1	453.849	-	453.849	1.5	22.89	0.25	12	669878	638624	656087	588148	581741	559708	604832	614468	550548	715428	715005	719103	0.00187618	-0.272952	0.0121084	-0.1911	0.0317208	0.254293	1.49866	2.72673	1.91691
1745		Feature_-_165.9726_23.1	165.973	-	165.973	-1.2	22.93	0.07	12	955281	790047	1158926	770665	752711	890026	786570	981692	713902	1107461	1041648	1062111	0.0365266	-0.272624	0.269057	-0.239707	0.0272059	0.406986	1.56534	1.43739	0.570155
10783		Feature_+_885.7956_22.8	885.796	+	885.796	0	22.84	0.34	12	119881	115490	132830	151366	97449	129417	143515	133619	145605	149798	166853	174449	0.028451	-0.27258	0.0738901	-0.29715	0.0529814	0.436306	1.27588	1.5459	1.13141
384		Feature_-_422.7952_23.5	422.795	-	422.795	0	23.48	0.14	12	216258	179541	241178	181289	126091	164342	155268	195524	195161	220013	195169	207066	0.0650689	-0.272542	0.769288	-0.047707	0.372569	0.211198	0.428793	1.18663	0.113911
10375		Feature_+_406.8383_23.3	406.838	+	406.838	0	23.35	0.25	12	267936	263413	289822	299288	220269	278204	228376	317071	214861	328747	332351	333769	0.0906515	-0.272471	0.0118937	-0.222765	0.00454799	0.500844	2.34218	1.04263	1.92468
276		Feature_-_520.7544_23.5	520.754	-	520.754	0	23.48	0.12	12	245219	224169	293937	231245	170117	214369	205344	259067	176469	282373	262602	274863	0.0555418	-0.272395	0.363019	-0.129697	0.0371436	0.470217	1.43012	1.25538	0.440071
63		Feature_-_802.7352_22.9	802.735	-	802.735	0	22.86	0.34	12	321240	247927	291204	267138	279599	238930	249744	235851	252744	318017	272901	284149	0.0241354	-0.272358	0.281861	-0.118132	0.781157	0.035862	0.107262	1.61735	0.549966
10075		Feature_+_322.8565_23.7	322.856	+	322.856	1.5	23.44	0.03	12	1337796	1373760	1438498	1134485	834128	1001204	1211463	1319940	860825	1566976	1545060	1153304	0.21008	-0.271927	0.550523	-0.111998	0.124312	0.492035	0.905488	0.677615	0.259225
10409		Feature_+_443.9021_22.9	443.902	+	443.902	0	22.85	0.41	12	145087	117898	126233	160453	137942	137687	100446	132476	161006	148725	169519	129141	0.195315	-0.271619	0.460124	-0.145078	0.938072	0.0108435	0.0277638	0.709263	0.337125
10589		Feature_+_633.8492_22.8	633.849	+	633.849	0	22.84	0.32	12	209828	156256	171193	158025	157491	168512	122186	201999	207004	174244	198470	222039	0.275284	-0.27159	0.066883	-0.292897	0.771267	0.0504283	0.112795	0.56022	1.17468
9994		Feature_+_285.0461_10.6	285.046	+	285.046	0	10.58	0.2	12	189810	146388	208449	195156	146055	151849	161686	210998	163106	241031	199893	192159	0.202564	-0.271361	0.316365	-0.202981	0.0869283	0.343439	1.06084	0.693438	0.499811
154		Feature_-_665.7720_22.6	665.772	-	665.772	8	22.76	0.29	12	891051	785662	1039952	1012245	796917	820790	890268	891249	1020082	1246016	925873	967738	0.157469	-0.270802	0.478347	-0.14579	0.294979	0.213339	0.530209	0.802806	0.320257
9766		Feature_+_234.8520_22.8	234.852	+	234.852	0	22.84	0.34	12	165080	150095	176733	144274	131389	139672	148525	147745	158228	175257	166842	183820	0.00608952	-0.270704	0.175967	-0.158801	0.105481	0.209935	0.976827	2.21542	0.75457
10642		Feature_+_696.8180_22.9	696.818	+	696.818	0	22.91	0.42	12	174980	127072	206688	157466	146949	189041	149940	183089	133833	196288	194879	238647	0.128986	-0.270683	0.165651	-0.358539	0.0367229	0.466645	1.43506	0.889457	0.780806
8318		Feature_+_168.1229_4.2	168.123	+	168.123	-1.2	3.98	0.04	1	-	-	-	-	2911161	-	-	-	-	-	-	-	NA	0	NA	0	0.373901	-0.344506
9801		Feature_+_239.1614_22.9	239.161	+	239.161	0	22.89	0.39	12	116493	166928	117289	150957	137596	114211	96018	119497	114061	141903	115917	139658	0.107909	-0.269607	0.49672	0.130717	0.431178	0.110581	0.365344	0.966942	0.303888
296		Feature_-_500.7711_23.5	500.771	-	500.771	0	23.51	0.13	12	71465	82706	71625	83114	60507	81583	61401	88548	85658	109738	84200	85131	0.246065	-0.26941	0.204807	-0.233028	0.138446	0.358744	0.85872	0.60895	0.688655
5912		Feature_+_108.0809_0.1	108.081	+	108.081	0	0.14	0.02	1	-	-	-	-	-	-	-	-	1866468	-	-	-	NA	0	NA	0	0.373901	-2.52087
9871		Feature_+_257.1781_3.2	257.178	+	257.178	0	3.23	0.03	2	-	-	-	-	2483525	-	-	-	-	-	2005511	-	0.373901	-0.00610959	0.373901	-0.00610959	0.39649	-0.111194
6187		Feature_+_116.0706_8.8	116.071	+	116.071	0	8.8	0.08	1	-	-	-	-	2258244	-	-	-	-	-	-	-	1	0	1	0	0.373901	-0.0973134
3261		Feature_-_96.9685_12.2	96.9685	-	96.9685	0	11.96	0.26	12	814049	951942	1036313	919464	691537	711110	733275	924454	724286	941553	833490	1079720	0.174768	-0.269191	0.834775	0.0265169	0.060053	0.35641	1.22147	0.757538	0.0784305
10369		Feature_+_404.8835_22.9	404.884	+	404.884	0	22.92	0.41	12	76013	74196	111751	84470	84658	52164	75868	85139	85032	92261	83045	81550	0.233079	-0.268949	0.718802	0.0742261	0.45145	0.0640443	0.34539	0.632496	0.14339
7514	Potassium Cluster Adduct	Feature_+_146.9252_23.3	146.925	+	146.925	0	23.28	0.27	12	3197296	2967463	3944154	3232416	2501888	2840398	2768718	3054324	2731118	3500012	3430753	3504786	0.00268112	-0.268495	0.756481	-0.0408754	0.0315267	0.307851	1.50132	2.57168	0.121202
5927		Feature_+_110.0715_5.0	110.072	+	110.072	0	5.01	0.43	3	302208	156062	-	-	-	-	-	-	-	-	-	133350	0.373901	-0.268365	0.811593	0.10574	0.495293	-0.646517	0.305138	0.427243	0.0906615
485		Feature_-_366.8691_23.3	366.869	-	366.869	0	23.33	0.31	12	158914	153098	222278	158658	112803	146132	150415	154461	142297	213000	151698	178511	0.161208	-0.268354	0.919463	-0.0245758	0.12545	0.391828	0.901529	0.792614	0.0364656
1106		Feature_-_204.9127_25.1	204.913	-	204.913	0	24.95	0.23	12	256861	263210	239822	214323	212464	197357	206784	227929	218564	247900	267290	245953	0.0190793	-0.268083	0.404454	-0.0854803	0.189704	0.145992	0.721925	1.71944	0.393131
2372		Feature_-_140.9388_23.3	140.939	-	140.939	0	23.33	0.49	12	309912	235618	334282	287541	310631	242240	230631	338192	257661	340074	257835	378690	0.325814	-0.267952	0.433157	-0.187729	0.455345	0.15321	0.341659	0.48703	0.363355
10595		Feature_+_640.6987_23.6	640.699	+	640.699	0	23.56	0.13	12	257137	293700	301785	278151	237989	258985	240954	264410	236465	284140	296638	339267	0.0458166	-0.267473	0.440223	-0.0746721	0.0249667	0.330667	1.60264	1.33898	0.356327
9217		Feature_+_212.0323_22.6	212.032	+	212.032	0	22.64	0.48	12	293038	198567	227065	257025	231391	217503	217393	179263	258341	220004	275821	242936	0.113998	-0.266496	0.468811	-0.113947	0.575576	-0.0834808	0.239898	0.943102	0.329003
8786		Feature_+_184.9195_23.3	184.919	+	184.919	0	23.28	0.29	12	12283208	11504006	16093250	12856157	9422535	11442742	11684544	13676116	11157136	15032979	14783478	14449974	0.0267908	-0.266374	0.406669	-0.129952	0.0110121	0.429754	1.95813	1.57201	0.390759
7887		Feature_+_157.0832_22.7	157.083	+	157.083	0	22.74	0.31	12	1497605	2106084	1545776	1820385	1372260	1733724	968226	1151801	1052529	1287967	1050256	2296282	0.59104	-0.266152	0.537691	0.239718	0.58864	0.240681	0.23015	0.228383	0.269468
3207		Feature_-_98.9655_12.7	98.9655	-	98.9655	0	12.66	0.47	12	196806	195019	246156	218644	142153	140086	160217	276195	169957	210758	177187	305268	0.533578	-0.265983	0.799881	-0.0712284	0.212565	0.445871	0.672509	0.272802	0.0969745
1863		Feature_-_161.9567_23.3	161.957	-	161.957	0	23.33	0.46	12	433046	402954	706626	620134	408158	500182	514188	535520	485566	691795	576095	595699	0.0482608	-0.265918	0.669829	-0.10755	0.0134854	0.490165	1.87014	1.31641	0.174036
398		Feature_-_414.7650_23.7	414.765	-	414.765	-0.2	23.48	0.1	12	202531	232945	299891	220332	180858	190957	215071	218325	202230	269216	255386	226042	0.0520527	-0.265767	0.977287	0.00484285	0.0196939	0.358166	1.70567	1.28356	0.00997803
1862		Feature_-_161.9751_22.9	161.975	-	161.975	0	22.86	0.24	12	46296	51489	48086	42763	37206	56455	30477	56088	110574	61939	59774	50102	0.362056	-0.264639	0.0911831	-0.271535	0.766789	-0.175766	0.115324	0.441224	1.04009
8191		Feature_+_165.0877_12.8	165.088	+	165.088	0	13.01	0.28	12	1273546	1183728	1226337	1351401	1200262	1189431	1040962	1054219	1237960	1307708	1347900	1288441	0.0121847	-0.263955	0.317046	-0.0683824	0.0478821	0.0875709	1.31983	1.91419	0.498878
10519		Feature_+_559.8527_23.0	559.853	+	559.853	-3.4	22.98	0.43	12	137960	160199	153405	175445	112585	137360	129036	131600	149593	134362	168164	175312	0.107406	-0.263768	0.805561	0.0334574	0.195844	0.256024	0.70809	0.968971	0.0939015
10411		Feature_+_444.7675_23.3	444.767	+	444.767	0	23.31	0.09	12	50646	31961	104627	64902	52983	67607	44553	51841	39049	73621	67085	56193	0.26619	-0.263751	0.946952	0.0332525	0.0534041	0.464693	1.27243	0.574808	0.023672
66		Feature_-_792.7421_22.9	792.742	-	792.742	0	22.93	0.48	12	39007	33046	52240	39705	32424	46955	45436	95644	91428	39183	41384	145085	0.761784	-0.263098	0.396757	-0.852275	0.625196	0.470476	0.203984	0.118168	0.401475
465		Feature_-_372.8767_23.2	372.877	-	372.877	0	23.22	0.23	12	430711	301408	402082	448009	255562	271147	310937	468432	305088	472159	360889	427352	0.363961	-0.262784	0.538471	-0.130369	0.217526	0.346399	0.66249	0.438946	0.268838
205		Feature_-_610.8225_22.8	610.822	-	610.822	0	22.76	0.31	12	204061	184969	248859	261627	181895	273236	223228	170933	231719	290455	221452	288637	0.299363	-0.262435	0.346083	-0.203024	0.0860402	0.374133	1.0653	0.523802	0.46082
6291		Feature_+_118.0661_5.4	118.066	+	118.066	0	5.64	0.27	12	139572	95470	118139	99645	129111	111644	113695	116928	168995	124686	138962	146791	0.0268666	-0.262046	0.0270945	-0.389835	0.540359	-0.092702	0.267317	1.57079	1.56712
145		Feature_-_674.7984_22.7	674.798	-	674.798	0	22.69	0.27	12	193922	121311	149064	176808	140952	132660	118195	129383	52511	198616	126717	130468	0.349107	-0.261501	0.924115	-0.0275387	0.655604	0.234636	0.183359	0.457041	0.034274
1111		Feature_-_204.9125_23.9	204.912	-	204.912	0	23.93	0.49	0	-	-	-	-	-	-	-	-	-	-	-	-	NA	0	NA	0	NA	0
10784		Feature_+_886.7675_22.7	886.768	+	886.768	0	22.74	0.44	12	76781	73636	102112	65495	56261	47857	83171	73603	35058	69913	66789	108577	0.472063	-0.261399	0.942185	-0.0239366	0.227138	0.545104	0.643709	0.326	0.0258638
317		Feature_-_480.8517_22.8	480.852	-	480.852	0	22.79	0.28	12	38823	32838	40547	34081	37352	20675	31550	43254	109305	34268	36520	43630	0.424384	-0.261059	0.564803	-0.0904337	0.377918	-0.69695	0.422603	0.372241	0.248103
335		Feature_-_462.9887_10.6	462.989	-	462.989	0	10.6	0.35	12	94309	75389	91969	83048	75388	75633	83255	104369	98145	102300	107123	106049	0.116595	-0.26104	0.0123498	-0.333243	0.091637	0.23613	1.03793	0.933321	1.90834
2391	Potassium Cluster Adduct	Feature_-_138.9403_23.3	138.94	-	138.94	0	23.33	0.45	12	9288013	8362310	10935559	9195079	7519457	8062662	8544852	9068288	8705518	10726414	9893547	10144184	0.0112342	-0.260841	0.396069	-0.110645	0.0384195	0.270018	1.41545	1.94946	0.402229
10793		Feature_+_926.7816_22.7	926.782	+	926.782	0.6	22.84	0.18	12	335179	274108	312929	270024	228904	225537	255568	249049	286894	284704	292475	296993	0.00805449	-0.259716	0.707212	-0.0285193	0.814924	0.038797	0.0888828	2.09396	0.150451
3284		Feature_-_96.9684_16.5	96.9684	-	96.9684	0	16.52	0.49	2	-	-	-	-	-	-	-	-	-	897623	970411	-	0.190215	-0.0881395	0.190215	-0.0881395	0.190215	0.0881395
10545		Feature_+_592.8262_22.7	592.826	+	592.826	0	22.88	0.23	12	479627	469313	507332	409581	465510	394754	475146	430562	415254	547152	491048	518434	0.0394242	-0.259406	0.157737	-0.167267	0.0614718	0.194408	1.21132	1.40424	0.802067
292		Feature_-_504.8587_23.0	504.859	-	504.859	1.2	22.83	0.29	12	218151	255784	336739	296548	242584	271898	288072	352328	345810	372007	354661	364742	0.0758801	-0.258616	0.0477582	-0.295823	0.0737665	0.436366	1.13214	1.11987	1.32095
5335		Feature_+_94.9300_24.3	94.93	+	94.93	-1.1	24.06	0.06	12	6634900	6947508	9254261	6936750	5873440	7196843	7174968	6497004	7636795	6655468	11372104	6921062	0.429002	-0.257612	0.742445	-0.108664	0.377017	0.308529	0.423639	0.367541	0.129336
246		Feature_-_557.8417_23.0	557.842	-	557.842	-6.6	22.86	0.31	12	273627	304563	233952	218411	264309	258004	215147	329055	274765	376012	335260	247638	0.358346	-0.257423	0.218997	-0.341243	0.269119	0.238671	0.570056	0.445697	0.659561
10425		Feature_+_462.7685_23.5	462.769	+	462.769	0	23.47	0.12	12	121849	145562	169488	151431	131948	117021	138023	162426	123541	158182	171979	168670	0.120095	-0.256879	0.264391	-0.0967328	0.00146673	0.402694	2.83365	0.920474	0.577753
10584		Feature_+_632.8459_22.9	632.846	+	632.846	0	22.95	0.41	12	1823506	1982279	2029268	1957576	1930396	2115856	1714445	2014380	2057658	2287313	2436351	2259861	0.0455914	-0.256831	0.0045124	-0.226436	0.0109477	0.26503	1.96068	1.34112	2.34559
10813		Feature_+_979.7695_23.1	979.769	+	979.769	-4.6	22.88	0.31	12	101468	114104	145511	87304	128057	102110	96631	130032	150330	115579	157647	119552	0.276218	-0.256622	0.516563	-0.179115	0.835781	0.0482653	0.0779074	0.558749	0.286876
10754		Feature_+_831.8125_22.8	831.812	+	831.812	0	22.81	0.29	12	357193	346073	347592	349602	305918	347993	276524	351959	406410	423400	375891	367264	0.102988	-0.256598	0.0784577	-0.161146	0.393504	0.12529	0.405051	0.987215	1.10536
4302		Feature_-_80.9155_10.2	80.9155	-	80.9155	0	10.21	0.19	12	203738	218427	182997	151015	179110	140006	186058	173584	180491	186524	209639	200464	0.102252	-0.255917	0.514031	-0.111014	0.347741	0.0828259	0.458744	0.990328	0.289011
101		Feature_-_738.7545_23.1	738.755	-	738.755	-2.2	22.89	0.25	12	631290	458646	532528	560870	461303	525923	468771	713370	749790	687995	600860	750406	0.266962	-0.255684	0.0375037	-0.393877	0.52473	0.146473	0.280064	0.573551	1.42593
297		Feature_-_498.7732_23.5	498.773	-	498.773	0	23.48	0.21	12	199511	219025	213111	207133	190452	186585	192354	230931	180227	251042	217029	260040	0.108196	-0.255657	0.0939893	-0.187735	0.0208622	0.352716	1.68064	0.96579	1.02692
1129		Feature_-_200.0790_3.1	200.079	-	200.079	0	3.13	0.09	0	-	-	-	-	-	-	-	-	-	-	-	-	NA	0	NA	0	NA	0
1130		Feature_-_199.9507_4.1	199.951	-	199.951	0	4.14	0.07	0	-	-	-	-	-	-	-	-	-	-	-	-	NA	0	NA	0	NA	0
391		Feature_-_420.7984_23.4	420.798	-	420.798	0	23.4	0.22	12	736223	708153	869378	786768	509044	566301	638323	927349	678506	837146	906584	801218	0.295841	-0.255447	0.341887	-0.106224	0.0505415	0.403698	1.29635	0.528942	0.466117
9891		Feature_+_262.8557_23.6	262.856	+	262.856	-4.6	23.44	0.07	12	277096	229570	305813	262173	202251	241368	252618	254706	226485	321723	295972	275928	0.0253747	-0.255294	0.281683	-0.16408	0.0717289	0.340341	1.14431	1.5956	0.550239
10601		Feature_+_645.8022_22.9	645.802	+	645.802	0	22.89	0.4	12	87439	65846	111074	83017	61328	74426	60525	89711	71156	108791	87748	71562	0.349591	-0.25502	0.880764	-0.0446146	0.290493	0.285778	0.536864	0.45644	0.0551406
10587		Feature_+_633.3479_22.8	633.348	+	633.348	0	22.75	0.25	12	94048	90241	118719	98608	71652	92349	99074	87786	92453	115808	110581	106740	0.0128713	-0.254736	0.390186	-0.115176	0.0312265	0.367855	1.50548	1.89038	0.408729
10495		Feature_+_540.7422_23.6	540.742	+	540.742	0	23.58	0.14	12	267362	247403	279448	271037	187808	258014	211819	222132	227285	272820	276967	275808	0.0338767	-0.254735	0.393684	-0.049248	0.106672	0.2747	0.971951	1.4701	0.404853
407		Feature_-_404.0129_10.7	404.013	-	404.013	0	10.72	0.1	12	124789	100986	119078	89666	80726	94535	81064	124507	100790	109310	124217	124418	0.234326	-0.254266	0.180493	-0.208727	0.27685	0.224769	0.557755	0.63018	0.74354
1137		Feature_-_199.1694_0.1	199.169	-	199.169	0	0.12	0.07	0	-	-	-	-	-	-	-	-	-	-	-	-	NA	0	NA	0	NA	0
9		Feature_-_930.6860_22.9	930.686	-	930.686	0	22.86	0.3	12	909690	823386	1082749	994486	725943	819843	965540	989364	764496	1245868	1077172	984970	0.128437	-0.253607	0.276448	-0.189602	0.0330168	0.462852	1.48126	0.891311	0.558387
1139		Feature_-_199.0757_3.1	199.076	-	199.076	0	3.13	0.06	0	-	-	-	-	-	-	-	-	-	-	-	-	NA	0	NA	0	NA	0
1140		Feature_-_199.0757_3.4	199.076	-	199.076	0	3.16	0.06	0	-	-	-	-	-	-	-	-	-	-	-	-	NA	0	NA	0	NA	0
375		Feature_-_432.7361_23.6	432.736	-	432.736	0	23.58	0.16	12	75867	81856	91114	91601	85521	69793	78593	100850	73515	104682	97917	94324	0.177585	-0.252576	0.069949	-0.166434	0.012274	0.338024	1.91101	0.750593	1.15522
319		Feature_-_478.8424_23.2	478.842	-	478.842	0	23.2	0.28	12	64532	56934	93859	87756	36969	49097	40202	101789	54126	71249	75773	80625	0.564144	-0.252561	0.772441	0.0674872	0.0472929	0.548706	1.3252	0.24861	0.112135
10812		Feature_+_979.7617_22.8	979.762	+	979.762	0	22.77	0.24	12	133965	114104	145511	176651	128057	103048	96631	130032	150330	115579	157647	119552	0.28067	-0.252512	0.554331	0.151494	0.685498	-0.0701623	0.163994	0.551804	0.256231
301		Feature_-_495.8414_22.7	495.841	-	495.841	-3.2	22.81	0.3	12	221902	179558	204475	190697	265494	177737	195600	180556	229143	198228	220835	240740	0.0587936	-0.252428	0.117237	-0.199151	0.358377	-0.11901	0.44566	1.23067	0.930935
10700		Feature_+_748.3258_22.9	748.326	+	748.326	0	22.91	0.42	12	125632	128168	167675	131285	149209	112130	108036	136630	193128	145905	144813	134219	0.0786987	-0.25215	0.958586	0.00741951	0.51538	-0.139164	0.287873	1.10403	0.0183691
10613		Feature_+_662.6761_23.5	662.676	+	662.676	0	23.5	0.15	12	77102	74074	94196	90307	65825	68964	93530	92368	70333	92215	93392	117867	0.234074	-0.251857	0.223069	-0.230979	0.0286101	0.50896	1.54348	0.630647	0.65156
9548		Feature_+_218.8654_23.4	218.865	+	218.865	0	23.4	0.1	12	963067	915618	1310474	1087569	817869	827127	1003306	1142553	833752	1124024	1239844	1175471	0.124114	-0.251567	0.561963	-0.0950539	0.0056263	0.436841	2.24978	0.906181	0.250292
6189		Feature_+_116.0707_9.1	116.071	+	116.071	-0.9	8.84	0.05	1	-	-	-	-	2193973	-	-	-	-	-	-	-	1	0	1	0	0.373901	-0.0817576
10483		Feature_+_528.7783_23.3	528.778	+	528.778	0	23.33	0.17	12	94086	82103	110651	75634	50317	51159	64501	111766	76074	83098	90610	97033	0.485803	-0.251516	0.948837	-0.0125932	0.276985	0.296285	0.557543	0.31354	0.0228083
5856		Feature_+_104.1072_12.1	104.107	+	104.107	0	12.37	0.25	12	113852	115671	118240	99923	133984	60313	84964	119705	124700	112069	107691	95655	0.401121	-0.251357	0.461231	0.0818796	0.0666403	-0.240129	1.17626	0.396725	0.336082
10671		Feature_+_716.8285_22.9	716.828	+	716.828	0	22.89	0.36	12	1758014	1524825	1902402	1652152	1405181	1374115	1401047	1599722	1567979	1766024	1740010	1700734	0.0196692	-0.251143	0.725053	-0.035736	0.201077	0.13819	0.696637	1.70621	0.13963
10786		Feature_+_895.7836_23.1	895.784	+	895.784	-1	22.98	0.41	12	194715	167235	220290	160172	165677	183421	207265	184687	229996	237452	240675	206228	0.0539404	-0.250247	0.106277	-0.321367	0.220606	0.213082	0.656382	1.26809	0.973561
10785		Feature_+_895.7805_22.8	895.78	+	895.78	0	22.81	0.24	12	195221	167235	220290	245133	165677	183421	207265	184687	229996	237452	240675	206228	0.0539404	-0.250247	0.535699	-0.113319	0.222521	0.211846	0.652629	1.26809	0.271079
10723		Feature_+_780.8020_22.8	780.802	+	780.802	0	22.84	0.39	12	129208	198253	163055	124743	135434	134806	129682	133112	205835	164742	149098	159056	0.00645461	-0.250205	0.849813	0.0395848	0.975808	0.00739874	0.0106358	2.19013	0.0706767
45		Feature_-_826.7271_22.8	826.727	-	826.727	0	22.83	0.38	12	131539	144476	106981	107057	100031	128817	136975	140408	132891	177889	159017	146087	0.0601739	-0.249812	0.055693	-0.429973	0.0492962	0.406238	1.30719	1.22059	1.2542
10474		Feature_+_522.7708_23.4	522.771	+	522.771	0	23.44	0.14	12	346773	401707	434634	398559	287568	329853	352321	361396	327170	456519	371495	412719	0.0666922	-0.249665	0.946294	-0.00679847	0.0364862	0.367817	1.43787	1.17593	0.0239737
1157		Feature_-_196.9305_15.0	196.93	-	196.93	0	14.97	0.11	0	-	-	-	-	-	-	-	-	-	-	-	-	NA	0	NA	0	NA	0
1158		Feature_-_196.9223_15.0	196.922	-	196.922	0	14.97	0.11	0	-	-	-	-	-	-	-	-	-	-	-	-	NA	0	NA	0	NA	0
188		Feature_-_626.1289_22.8	626.129	-	626.129	0	22.83	0.38	11	45489	27354	102435	30881	36380	27270	27880	25862	-	26837	40643	28829	0.306152	-0.249535	0.436428	0.738358	0.93027	0.0471394	0.0313908	0.514063	0.360088
9097		Feature_+_206.0403_8.9	206.04	+	206.04	0	8.88	0.11	12	99423	102547	84618	70480	92845	90424	90003	77233	85406	104650	112933	88533	0.125847	-0.24861	0.240174	-0.248694	0.313435	0.140686	0.503852	0.900158	0.619474
1161		Feature_-_195.9260_14.9	195.926	-	195.926	0	14.95	0.13	0	-	-	-	-	-	-	-	-	-	-	-	-	NA	0	NA	0	NA	0
142		Feature_-_683.4379_22.6	683.438	-	683.438	-0.7	22.76	0.23	12	174658	270289	205132	363013	220967	350524	143780	241179	254055	265407	287982	320358	0.497302	-0.248524	0.820188	-0.0595184	0.0560013	0.427486	1.2518	0.30338	0.0860868
6359		Feature_+_122.9455_23.9	122.945	+	122.945	0	23.91	0.29	12	225959	210955	278926	220174	185520	191005	208463	194761	212954	225034	184736	296124	0.322311	-0.248433	0.973267	0.00847922	0.477338	0.176905	0.321174	0.491724	0.0117678
10242		Feature_+_346.8361_23.4	346.836	+	346.836	0	23.37	0.11	12	144287	139515	215536	160792	105518	112523	122031	192784	111049	146150	164781	196362	0.413803	-0.247442	0.920934	0.0241128	0.0621167	0.491404	1.20679	0.383206	0.0357714
1098		Feature_-_206.9105_23.3	206.911	-	206.911	0	23.29	0.4	12	545288	467243	628866	523967	424010	483342	516677	487782	478036	660245	528256	577258	0.0810157	-0.247107	0.470788	-0.124227	0.111288	0.286891	0.953551	1.09143	0.327175
10283		Feature_+_360.8140_23.9	360.814	+	360.814	-6.1	23.69	0.08	12	310160	312866	430004	295694	291928	293270	299603	302069	263022	318067	434810	309026	0.242231	-0.246786	0.900616	-0.0320619	0.19985	0.295696	0.699295	0.61577	0.0454603
1167		Feature_-_194.9880_3.1	194.988	-	194.988	0	3.14	0.08	0	-	-	-	-	-	-	-	-	-	-	-	-	NA	0	NA	0	NA	0
1168		Feature_-_194.9758_15.0	194.976	-	194.976	0	14.96	0.11	0	-	-	-	-	-	-	-	-	-	-	-	-	NA	0	NA	0	NA	0
1169		Feature_-_194.9391_11.4	194.939	-	194.939	0	11.36	0.14	0	-	-	-	-	-	-	-	-	-	-	-	-	NA	0	NA	0	NA	0
1170		Feature_-_194.9266_15.0	194.927	-	194.927	0	14.97	0.1	0	-	-	-	-	-	-	-	-	-	-	-	-	NA	0	NA	0	NA	0
1015		Feature_-_220.8866_23.4	220.887	-	220.887	0	23.39	0.27	12	11583031	11803636	14793441	12067528	9731877	10167013	11066849	12720122	10976918	13304800	13337316	13641265	0.049141	-0.246604	0.604666	-0.0591713	0.00866754	0.319016	2.0621	1.30856	0.218484
1172		Feature_-_194.9051_18.5	194.905	-	194.905	0	18.48	0.3	0	-	-	-	-	-	-	-	-	-	-	-	-	NA	0	NA	0	NA	0
435		Feature_-_390.8792_23.0	390.879	-	390.879	-1	22.86	0.26	12	117352	100629	130194	50575	110863	107253	92134	63742	128190	102194	133827	76153	0.479631	-0.24658	0.737959	-0.149738	0.445115	-0.191167	0.351528	0.319093	0.131968
1174		Feature_-_194.8774_15.0	194.877	-	194.877	0	14.97	0.11	0	-	-	-	-	-	-	-	-	-	-	-	-	NA	0	NA	0	NA	0
1891		Feature_-_159.0217_11.9	159.022	-	159.022	0	11.85	0.13	12	224436	198289	242801	225995	205168	208305	224862	195782	233287	239510	265178	241439	0.0295853	-0.246478	0.161842	-0.161551	0.0767991	0.17065	1.11464	1.52892	0.790908
8431		Feature_+_171.0987_22.7	171.099	+	171.099	0	22.74	0.32	12	285695	339575	305975	300439	335767	288621	214463	233319	195962	239732	263672	370194	0.375088	-0.246474	0.595703	0.114854	0.760111	0.095885	0.119123	0.425867	0.22497
498		Feature_-_358.7989_23.4	358.799	-	358.799	0	23.42	0.09	12	791245	771259	1034718	896464	693276	731363	828393	988251	810378	1017218	959742	1045467	0.115968	-0.246338	0.254086	-0.161444	0.00536452	0.397277	2.27047	0.935662	0.59502
10694		Feature_+_738.8076_22.6	738.808	+	738.808	4.6	22.85	0.21	12	429158	376914	461802	451622	335285	329653	337496	386800	408069	471813	384296	393298	0.119997	-0.245438	0.741476	0.0465055	0.554283	0.0916408	0.256269	0.920831	0.129903
10767		Feature_+_862.8076_22.6	862.808	+	862.808	2	22.81	0.23	12	585864	487754	554059	536295	410567	487097	427604	517732	428680	545450	565109	587390	0.0383499	-0.245325	0.160564	-0.105597	0.185594	0.252719	0.731435	1.41624	0.794353
758		Feature_-_266.9132_23.3	266.913	-	266.913	0	23.26	0.44	12	290283	253163	388048	344418	236849	300310	306802	321327	268562	406734	347856	345850	0.0518235	-0.245201	0.438027	-0.158964	0.0159028	0.467795	1.79853	1.28547	0.358499
47		Feature_-_825.7254_22.9	825.725	-	825.725	0	22.86	0.34	12	288941	215503	246934	329845	178621	273904	237715	316968	232244	362327	290755	328977	0.172701	-0.245157	0.187899	-0.309796	0.068386	0.488855	1.16503	0.762704	0.726075
119		Feature_-_718.7600_23.2	718.76	-	718.76	0	22.93	0.27	12	1581443	1617901	1600248	1220888	1393164	1298250	1357647	1405302	1075521	1409724	1594948	1807709	0.103327	-0.244845	0.512112	-0.116504	0.246059	0.248783	0.60896	0.985788	0.290635
396		Feature_-_416.7629_23.5	416.763	-	416.763	0	23.48	0.12	12	78332	57156	110239	94434	62199	81822	74360	91497	90164	92540	104022	96549	0.0649059	-0.242976	0.552308	-0.162822	0.076743	0.34546	1.11496	1.18772	0.257819
1865		Feature_-_161.9520_23.3	161.952	-	161.952	0	23.46	0.21	12	315813	313275	364364	350691	327280	276562	300346	311993	316340	403718	300607	347589	0.160386	-0.242922	0.825932	-0.0327134	0.362772	0.132763	0.440366	0.794834	0.0830557
2496		Feature_-_128.8913_10.1	128.891	-	128.891	0	10.14	0.12	12	77153	80761	89053	107868	82697	79062	83710	76106	74949	76885	79263	126523	0.421501	-0.24285	0.931	-0.0256902	0.383752	0.267698	0.41595	0.375201	0.0310504
3352		Feature_-_95.9845_24.4	95.9845	-	95.9845	-1	24.12	0.09	12	832282	706528	1055906	854098	693470	808809	838010	885055	917488	834298	1294391	866944	0.360625	-0.242655	0.520282	-0.195205	0.319077	0.294065	0.496105	0.442944	0.283761
1335	Potassium Cluster Adduct	Feature_-_182.9304_23.3	182.93	-	182.93	0	23.31	0.4	12	10168616	9701544	11841023	10462041	8648007	9598144	9536336	9887120	9398203	12059472	10670535	11604066	0.0138304	-0.242514	0.357737	-0.101361	0.0272654	0.283188	1.56439	1.85917	0.446436
8131		Feature_+_164.1281_14.3	164.128	+	164.128	-1.2	14.53	0.1	6	-	101983	-	388619	-	66467	-	-	61789	-	64828	77724	0.429165	-0.242442	0.336535	1.50495	0.332028	0.285236	0.478825	0.367375	0.47297
10520		Feature_+_560.7244_23.4	560.724	+	560.724	0	23.4	0.17	12	128946	103092	134086	133522	101359	114944	102124	143512	104106	146264	130993	149133	0.178634	-0.241854	0.187318	-0.201921	0.0423435	0.350551	1.37321	0.748037	0.727419
10771		Feature_+_864.7802_22.9	864.78	+	864.78	0	22.85	0.36	12	118873	143770	132794	153229	176984	141234	123796	132965	137620	151501	184059	134893	0.189404	-0.2413	0.433986	-0.130409	0.611425	0.118095	0.213657	0.722611	0.362524
1323		Feature_-_183.9341_23.3	183.934	-	183.934	0	23.31	0.12	12	93638	75085	117509	119740	75889	97129	75072	107695	74654	101093	116005	113705	0.186951	-0.241081	0.707069	-0.0828827	0.0198413	0.438021	1.70243	0.728273	0.150538
1192		Feature_-_188.9388_0.6	188.939	-	188.939	-1.1	0.78	0.29	0	-	-	-	-	-	-	-	-	-	-	-	-	1	0	1	0	1	0
1193		Feature_-_188.9387_0.9	188.939	-	188.939	0	0.94	0.42	0	-	-	-	-	-	-	-	-	-	-	-	-	NA	0	NA	0	NA	0
1194		Feature_-_188.9387_1.3	188.939	-	188.939	-1.1	1.18	0.33	0	-	-	-	-	-	-	-	-	-	-	-	-	NA	0	NA	0	NA	0
1195		Feature_-_188.9387_4.9	188.939	-	188.939	-1.1	5	0.34	0	-	-	-	-	-	-	-	-	-	-	-	-	NA	0	NA	0	NA	0
1196		Feature_-_188.9387_5.2	188.939	-	188.939	0	5.18	0.43	0	-	-	-	-	-	-	-	-	-	-	-	-	NA	0	NA	0	NA	0
1197		Feature_-_188.9386_0.1	188.939	-	188.939	0	0.12	0.24	0	-	-	-	-	-	-	-	-	-	-	-	-	NA	0	NA	0	NA	0
1198		Feature_-_188.9386_2.3	188.939	-	188.939	-0.5	2.12	0.27	0	-	-	-	-	-	-	-	-	-	-	-	-	NA	0	NA	0	NA	0
1199		Feature_-_188.9386_4.0	188.939	-	188.939	0	3.78	0.27	0	-	-	-	-	-	-	-	-	-	-	-	-	NA	0	NA	0	NA	0
1200		Feature_-_188.9386_6.3	188.939	-	188.939	-0.5	6.5	0.24	0	-	-	-	-	-	-	-	-	-	-	-	-	NA	0	NA	0	NA	0
1201		Feature_-_188.9386_21.7	188.939	-	188.939	-1.1	21.92	0.12	0	-	-	-	-	-	-	-	-	-	-	-	-	NA	0	NA	0	NA	0
1202		Feature_-_188.9386_24.8	188.939	-	188.939	0	24.82	0.48	0	-	-	-	-	-	-	-	-	-	-	-	-	NA	0	NA	0	NA	0
1203		Feature_-_188.9386_25.8	188.939	-	188.939	0	25.83	0.45	0	-	-	-	-	-	-	-	-	-	-	-	-	1	0	1	0	1	0
1204		Feature_-_188.9386_26.2	188.939	-	188.939	0	25.97	0.24	0	-	-	-	-	-	-	-	-	-	-	-	-	NA	0	NA	0	NA	0
1205		Feature_-_188.9386_26.5	188.939	-	188.939	0	26.3	0.29	0	-	-	-	-	-	-	-	-	-	-	-	-	NA	0	NA	0	NA	0
1206		Feature_-_188.9386_27.1	188.939	-	188.939	-1.1	26.9	0.31	0	-	-	-	-	-	-	-	-	-	-	-	-	NA	0	NA	0	NA	0
1207		Feature_-_188.9386_29.7	188.939	-	188.939	0	29.66	0.34	0	-	-	-	-	-	-	-	-	-	-	-	-	NA	0	NA	0	NA	0
1208		Feature_-_188.9386_29.9	188.939	-	188.939	-0.5	29.74	0.27	0	-	-	-	-	-	-	-	-	-	-	-	-	NA	0	NA	0	NA	0
1209		Feature_-_188.9385_1.8	188.939	-	188.939	0.5	1.85	0.39	0	-	-	-	-	-	-	-	-	-	-	-	-	NA	0	NA	0	NA	0
1210		Feature_-_188.9385_2.0	188.939	-	188.939	0	2.04	0.44	0	-	-	-	-	-	-	-	-	-	-	-	-	NA	0	NA	0	NA	0
1211		Feature_-_188.9385_3.3	188.939	-	188.939	0	3.34	0.17	0	-	-	-	-	-	-	-	-	-	-	-	-	NA	0	NA	0	NA	0
1212		Feature_-_188.9385_3.6	188.939	-	188.939	1.1	3.37	0.25	0	-	-	-	-	-	-	-	-	-	-	-	-	NA	0	NA	0	NA	0
1213		Feature_-_188.9385_4.3	188.939	-	188.939	0	4.33	0.47	0	-	-	-	-	-	-	-	-	-	-	-	-	NA	0	NA	0	NA	0
1214		Feature_-_188.9385_5.9	188.939	-	188.939	0	5.89	0.4	0	-	-	-	-	-	-	-	-	-	-	-	-	NA	0	NA	0	NA	0
1215		Feature_-_188.9385_7.2	188.939	-	188.939	0	7.17	0.24	0	-	-	-	-	-	-	-	-	-	-	-	-	NA	0	NA	0	NA	0
1216		Feature_-_188.9385_7.7	188.939	-	188.939	0	7.97	0.25	0	-	-	-	-	-	-	-	-	-	-	-	-	NA	0	NA	0	NA	0
1217		Feature_-_188.9385_8.4	188.939	-	188.939	0.5	8.62	0.24	0	-	-	-	-	-	-	-	-	-	-	-	-	NA	0	NA	0	NA	0
1218		Feature_-_188.9385_8.8	188.939	-	188.939	0	8.79	0.44	0	-	-	-	-	-	-	-	-	-	-	-	-	NA	0	NA	0	NA	0
1219		Feature_-_188.9385_9.2	188.939	-	188.939	0	9.19	0.47	0	-	-	-	-	-	-	-	-	-	-	-	-	NA	0	NA	0	NA	0
1220		Feature_-_188.9385_10.9	188.939	-	188.939	0	10.93	0.41	0	-	-	-	-	-	-	-	-	-	-	-	-	NA	0	NA	0	NA	0
1221		Feature_-_188.9385_11.2	188.939	-	188.939	0	10.94	0.23	0	-	-	-	-	-	-	-	-	-	-	-	-	NA	0	NA	0	NA	0
1222		Feature_-_188.9385_12.5	188.939	-	188.939	0	12.51	0.44	0	-	-	-	-	-	-	-	-	-	-	-	-	NA	0	NA	0	NA	0
1223		Feature_-_188.9385_13.1	188.939	-	188.939	0	13.1	0.39	0	-	-	-	-	-	-	-	-	-	-	-	-	NA	0	NA	0	NA	0
1224		Feature_-_188.9385_14.1	188.939	-	188.939	0.5	13.9	0.23	0	-	-	-	-	-	-	-	-	-	-	-	-	NA	0	NA	0	NA	0
1225		Feature_-_188.9385_15.3	188.939	-	188.939	0	15.46	0.16	0	-	-	-	-	-	-	-	-	-	-	-	-	NA	0	NA	0	NA	0
1226		Feature_-_188.9385_15.6	188.939	-	188.939	-0.5	15.89	0.24	0	-	-	-	-	-	-	-	-	-	-	-	-	NA	0	NA	0	NA	0
1227		Feature_-_188.9385_16.0	188.939	-	188.939	0	16.03	0.41	0	-	-	-	-	-	-	-	-	-	-	-	-	NA	0	NA	0	NA	0
1228		Feature_-_188.9385_16.5	188.939	-	188.939	0	16.48	0.44	0	-	-	-	-	-	-	-	-	-	-	-	-	NA	0	NA	0	NA	0
1229		Feature_-_188.9385_16.8	188.939	-	188.939	0	16.54	0.25	0	-	-	-	-	-	-	-	-	-	-	-	-	1	0	1	0	1	0
1230		Feature_-_188.9385_17.0	188.939	-	188.939	0	17.02	0.47	0	-	-	-	-	-	-	-	-	-	-	-	-	NA	0	NA	0	NA	0
1231		Feature_-_188.9385_17.3	188.939	-	188.939	-0.5	17.18	0.31	0	-	-	-	-	-	-	-	-	-	-	-	-	NA	0	NA	0	NA	0
1232		Feature_-_188.9385_17.6	188.939	-	188.939	0	17.59	0.48	0	-	-	-	-	-	-	-	-	-	-	-	-	1	0	1	0	1	0
1233		Feature_-_188.9385_17.9	188.939	-	188.939	0	18.17	0.25	0	-	-	-	-	-	-	-	-	-	-	-	-	1	0	1	0	1	0
1234		Feature_-_188.9385_19.1	188.939	-	188.939	0	19.05	0.48	0	-	-	-	-	-	-	-	-	-	-	-	-	NA	0	NA	0	NA	0
1235		Feature_-_188.9385_19.3	188.939	-	188.939	0.5	19.28	0.38	0	-	-	-	-	-	-	-	-	-	-	-	-	NA	0	NA	0	NA	0
1236		Feature_-_188.9385_19.8	188.939	-	188.939	0	19.83	0.46	0	-	-	-	-	-	-	-	-	-	-	-	-	NA	0	NA	0	NA	0
1237		Feature_-_188.9385_20.1	188.939	-	188.939	0	20.08	0.46	0	-	-	-	-	-	-	-	-	-	-	-	-	NA	0	NA	0	NA	0
1238		Feature_-_188.9385_20.5	188.939	-	188.939	0	20.32	0.25	0	-	-	-	-	-	-	-	-	-	-	-	-	NA	0	NA	0	NA	0
1239		Feature_-_188.9385_20.9	188.939	-	188.939	-0.5	21	0.39	0	-	-	-	-	-	-	-	-	-	-	-	-	NA	0	NA	0	NA	0
1240		Feature_-_188.9385_22.0	188.939	-	188.939	-0.5	22.26	0.24	0	-	-	-	-	-	-	-	-	-	-	-	-	NA	0	NA	0	NA	0
10761		Feature_+_843.3052_22.9	843.305	+	843.305	0	22.91	0.41	12	130437	79542	130258	107197	95568	103852	82831	142515	145885	126344	145618	117087	0.361755	-0.240996	0.228281	-0.295483	0.754687	0.0650759	0.122233	0.441586	0.641529
1242		Feature_-_188.9385_23.7	188.939	-	188.939	0	23.49	0.07	0	-	-	-	-	-	-	-	-	-	-	-	-	NA	0	NA	0	NA	0
1243		Feature_-_188.9385_24.0	188.939	-	188.939	-0.5	24.25	0.05	0	-	-	-	-	-	-	-	-	-	-	-	-	NA	0	NA	0	NA	0
1244		Feature_-_188.9385_24.3	188.939	-	188.939	0	24.3	0.34	0	-	-	-	-	-	-	-	-	-	-	-	-	NA	0	NA	0	NA	0
1245		Feature_-_188.9385_24.6	188.939	-	188.939	0	24.4	0.28	0	-	-	-	-	-	-	-	-	-	-	-	-	NA	0	NA	0	NA	0
1246		Feature_-_188.9385_25.1	188.939	-	188.939	-0.5	25.14	0.41	0	-	-	-	-	-	-	-	-	-	-	-	-	NA	0	NA	0	NA	0
1247		Feature_-_188.9385_25.4	188.939	-	188.939	0	25.35	0.44	0	-	-	-	-	-	-	-	-	-	-	-	-	1	0	1	0	1	0
1248		Feature_-_188.9385_26.8	188.939	-	188.939	0	26.76	0.49	0	-	-	-	-	-	-	-	-	-	-	-	-	1	0	1	0	1	0
1249		Feature_-_188.9385_27.6	188.939	-	188.939	0	27.57	0.49	0	-	-	-	-	-	-	-	-	-	-	-	-	NA	0	NA	0	NA	0
1250		Feature_-_188.9385_27.9	188.939	-	188.939	-0.5	27.69	0.3	0	-	-	-	-	-	-	-	-	-	-	-	-	NA	0	NA	0	NA	0
1251		Feature_-_188.9385_28.2	188.939	-	188.939	0	27.93	0.24	0	-	-	-	-	-	-	-	-	-	-	-	-	NA	0	NA	0	NA	0
1252		Feature_-_188.9385_29.0	188.939	-	188.939	0	28.95	0.42	0	-	-	-	-	-	-	-	-	-	-	-	-	NA	0	NA	0	NA	0
1253		Feature_-_188.9385_29.2	188.939	-	188.939	-0.5	29.08	0.35	0	-	-	-	-	-	-	-	-	-	-	-	-	NA	0	NA	0	NA	0
1254		Feature_-_188.9384_3.0	188.938	-	188.938	0.5	3.28	0.25	0	-	-	-	-	-	-	-	-	-	-	-	-	NA	0	NA	0	NA	0
1255		Feature_-_188.9384_4.6	188.938	-	188.938	0	4.6	0.46	0	-	-	-	-	-	-	-	-	-	-	-	-	1	0	1	0	1	0
1256		Feature_-_188.9384_5.6	188.938	-	188.938	0.5	5.86	0.26	0	-	-	-	-	-	-	-	-	-	-	-	-	NA	0	NA	0	NA	0
1257		Feature_-_188.9384_6.5	188.938	-	188.938	0	6.54	0.48	0	-	-	-	-	-	-	-	-	-	-	-	-	NA	0	NA	0	NA	0
1258		Feature_-_188.9384_6.9	188.938	-	188.938	0	6.86	0.3	0	-	-	-	-	-	-	-	-	-	-	-	-	NA	0	NA	0	NA	0
1259		Feature_-_188.9384_8.0	188.938	-	188.938	0	8.01	0.36	0	-	-	-	-	-	-	-	-	-	-	-	-	1	0	1	0	1	0
1260		Feature_-_188.9384_9.5	188.938	-	188.938	0	9.61	0.32	0	-	-	-	-	-	-	-	-	-	-	-	-	NA	0	NA	0	NA	0
1261		Feature_-_188.9384_9.8	188.938	-	188.938	0	9.82	0.39	0	-	-	-	-	-	-	-	-	-	-	-	-	1	0	1	0	1	0
1262		Feature_-_188.9384_10.1	188.938	-	188.938	0.5	9.89	0.16	0	-	-	-	-	-	-	-	-	-	-	-	-	NA	0	NA	0	NA	0
1263		Feature_-_188.9384_10.3	188.938	-	188.938	0	10.42	0.12	0	-	-	-	-	-	-	-	-	-	-	-	-	NA	0	NA	0	NA	0
1264		Feature_-_188.9384_10.6	188.938	-	188.938	0	10.6	0.4	0	-	-	-	-	-	-	-	-	-	-	-	-	NA	0	NA	0	NA	0
1265		Feature_-_188.9384_11.5	188.938	-	188.938	0	11.72	0.14	0	-	-	-	-	-	-	-	-	-	-	-	-	NA	0	NA	0	NA	0
1266		Feature_-_188.9384_11.8	188.938	-	188.938	0	11.81	0.33	0	-	-	-	-	-	-	-	-	-	-	-	-	NA	0	NA	0	NA	0
1267		Feature_-_188.9384_12.2	188.938	-	188.938	0	12.19	0.45	0	-	-	-	-	-	-	-	-	-	-	-	-	NA	0	NA	0	NA	0
1268		Feature_-_188.9384_12.8	188.938	-	188.938	0	12.71	0.34	0	-	-	-	-	-	-	-	-	-	-	-	-	NA	0	NA	0	NA	0
1269		Feature_-_188.9384_13.5	188.938	-	188.938	0	13.63	0.3	0	-	-	-	-	-	-	-	-	-	-	-	-	NA	0	NA	0	NA	0
1270		Feature_-_188.9384_13.9	188.938	-	188.938	0	13.86	0.48	0	-	-	-	-	-	-	-	-	-	-	-	-	NA	0	NA	0	NA	0
1271		Feature_-_188.9384_14.4	188.938	-	188.938	0.5	14.13	0.11	0	-	-	-	-	-	-	-	-	-	-	-	-	NA	0	NA	0	NA	0
1272		Feature_-_188.9384_14.7	188.938	-	188.938	0.5	14.45	0.23	0	-	-	-	-	-	-	-	-	-	-	-	-	NA	0	NA	0	NA	0
1273		Feature_-_188.9384_18.4	188.938	-	188.938	0	18.38	0.42	0	-	-	-	-	-	-	-	-	-	-	-	-	NA	0	NA	0	NA	0
1274		Feature_-_188.9384_18.7	188.938	-	188.938	0.5	18.54	0.28	0	-	-	-	-	-	-	-	-	-	-	-	-	1	0	1	0	1	0
1275		Feature_-_188.9384_21.2	188.938	-	188.938	0	21.44	0.14	0	-	-	-	-	-	-	-	-	-	-	-	-	NA	0	NA	0	NA	0
1276		Feature_-_188.9384_21.5	188.938	-	188.938	0.5	21.72	0.08	0	-	-	-	-	-	-	-	-	-	-	-	-	1	0	1	0	1	0
9549		Feature_+_218.8654_23.7	218.865	+	218.865	0.5	23.47	0.09	12	764966	881296	935155	863859	556395	634107	1003306	820802	541029	970895	1239844	693122	0.478968	-0.240361	0.664261	-0.115573	0.116105	0.640817	0.935151	0.319693	0.177661
4446		Feature_-_72.9418_10.6	72.9418	-	72.9418	0	10.59	0.12	12	4023058	3738603	4778856	4190354	3098454	3142717	3601705	5140523	3872736	4788710	4281341	4968678	0.323575	-0.240277	0.290742	-0.143697	0.0451379	0.352663	1.34546	0.490025	0.536492
10749		Feature_+_822.7911_23.1	822.791	+	822.791	-5.1	22.95	0.31	12	313707	299239	323318	333462	335891	240779	327566	332838	330755	338240	378230	347493	0.167262	-0.239556	0.0848011	-0.154337	0.113966	0.118075	0.943226	0.776602	1.0716
1280		Feature_-_188.9384_28.5	188.938	-	188.938	0.5	28.4	0.37	0	-	-	-	-	-	-	-	-	-	-	-	-	NA	0	NA	0	NA	0
10211		Feature_+_334.2221_2.8	334.222	+	334.222	0	2.83	0.21	5	-	122592	-	-	35665	15876	-	-	52821	23563	-	-	0.503974	-0.239118	0.417651	1.56932	0.222646	-1.01727	0.652385	0.297592	0.379186
482		Feature_-_367.8811_22.6	367.881	-	367.881	0.8	22.76	0.32	12	11892872	11246997	12350514	12059870	10517989	11475106	9433346	11794416	11226654	13417972	12183234	12972931	0.0761531	-0.238217	0.117844	-0.113433	0.0374134	0.197563	1.42697	1.11831	0.928693
606		Feature_-_320.8430_23.4	320.843	-	320.843	0	23.39	0.07	12	2369052	1952784	2822556	2422251	1808111	1994512	2154065	2477211	2130860	2698644	2632859	2483476	0.0634738	-0.23815	0.471788	-0.118728	0.0451226	0.309054	1.34561	1.19741	0.326253
607		Feature_-_320.8427_23.6	320.843	-	320.843	0.9	23.42	0.06	12	2369052	1952784	2786057	2422251	1808111	1994512	2154065	2477211	2130860	2698644	2632859	2483476	0.0634738	-0.23815	0.43156	-0.126062	0.0451226	0.309054	1.34561	1.19741	0.364958
10758		Feature_+_840.6096_23.6	840.61	+	840.61	0	23.61	0.2	12	81652	114623	110250	90505	90709	76935	79193	93433	100155	93248	104255	96745	0.0710706	-0.23764	0.43352	0.100049	0.311001	0.110692	0.507239	1.14831	0.362991
1286		Feature_-_186.0780_0.3	186.078	-	186.078	0	0.32	0.16	0	-	-	-	-	-	-	-	-	-	-	-	-	NA	0	NA	0	NA	0
1287		Feature_-_186.0779_2.5	186.078	-	186.078	0	2.54	0.27	0	-	-	-	-	-	-	-	-	-	-	-	-	NA	0	NA	0	NA	0
3260		Feature_-_96.9685_11.8	96.9685	-	96.9685	0	11.65	0.27	12	992478	985979	1094332	1098589	814400	893772	925738	1236350	833885	1299270	1026184	1276472	0.263289	-0.23719	0.211585	-0.180241	0.036992	0.447814	1.43189	0.579567	0.674516
624		Feature_-_312.9135_22.5	312.913	-	312.913	1	22.76	0.19	12	2766553	2261629	3064759	2602837	2339626	2197830	2472920	3118998	2880212	3224189	2705870	3245432	0.228349	-0.236209	0.227944	-0.210605	0.175738	0.200242	0.755135	0.641401	0.642172
8864		Feature_+_198.0102_10.7	198.01	+	198.01	0	10.72	0.13	12	204910	175486	177740	160243	160703	156949	153317	186260	148521	184826	215755	184053	0.117422	-0.235664	0.114731	-0.187257	0.306462	0.185389	0.513624	0.930249	0.940321
8194		Feature_+_165.0877_14.2	165.088	+	165.088	0	14.43	0.23	12	2310761	2119292	2277133	2214455	2117026	1978034	1954051	1903568	2232332	2297674	2381674	2190039	0.00445815	-0.235287	0.297361	-0.055339	0.42713	0.0446334	0.36944	2.35085	0.526717
1292		Feature_-_184.9673_14.1	184.967	-	184.967	0	14.13	0.33	0	-	-	-	-	-	-	-	-	-	-	-	-	NA	0	NA	0	NA	0
1293		Feature_-_184.9673_19.0	184.967	-	184.967	0	19.03	0.35	0	-	-	-	-	-	-	-	-	-	-	-	-	NA	0	NA	0	NA	0
1294		Feature_-_184.9673_24.8	184.967	-	184.967	0	24.82	0.49	0	-	-	-	-	-	-	-	-	-	-	-	-	NA	0	NA	0	NA	0
1295		Feature_-_184.9672_12.7	184.967	-	184.967	0	12.66	0.44	0	-	-	-	-	-	-	-	-	-	-	-	-	NA	0	NA	0	NA	0
1296		Feature_-_184.9672_13.7	184.967	-	184.967	0	13.75	0.47	0	-	-	-	-	-	-	-	-	-	-	-	-	NA	0	NA	0	NA	0
1297		Feature_-_184.9672_20.8	184.967	-	184.967	0	20.82	0.49	0	-	-	-	-	-	-	-	-	-	-	-	-	NA	0	NA	0	NA	0
1298		Feature_-_184.9672_21.2	184.967	-	184.967	0.5	21.4	0.28	0	-	-	-	-	-	-	-	-	-	-	-	-	NA	0	NA	0	NA	0
1299		Feature_-_184.9672_21.6	184.967	-	184.967	-0.5	21.84	0.18	0	-	-	-	-	-	-	-	-	-	-	-	-	NA	0	NA	0	NA	0
1300		Feature_-_184.9672_21.8	184.967	-	184.967	-0.5	21.95	0.25	0	-	-	-	-	-	-	-	-	-	-	-	-	NA	0	NA	0	NA	0
10513		Feature_+_554.0549_10.6	554.055	+	554.055	0	10.59	0.24	12	130613	111769	147263	156335	120816	124247	132480	179916	129766	170859	184952	158007	0.247464	-0.234803	0.104277	-0.306871	0.00621215	0.430728	2.20676	0.606489	0.98181
1302		Feature_-_184.9672_25.4	184.967	-	184.967	0	25.35	0.44	0	-	-	-	-	-	-	-	-	-	-	-	-	NA	0	NA	0	NA	0
1303		Feature_-_184.9671_13.1	184.967	-	184.967	-0.5	13.27	0.21	0	-	-	-	-	-	-	-	-	-	-	-	-	NA	0	NA	0	NA	0
1304		Feature_-_184.9671_13.3	184.967	-	184.967	0	13.35	0.43	0	-	-	-	-	-	-	-	-	-	-	-	-	NA	0	NA	0	NA	0
1305		Feature_-_184.9671_16.1	184.967	-	184.967	0	16.07	0.43	0	-	-	-	-	-	-	-	-	-	-	-	-	NA	0	NA	0	NA	0
1306		Feature_-_184.9671_18.1	184.967	-	184.967	0	18.1	0.44	0	-	-	-	-	-	-	-	-	-	-	-	-	NA	0	NA	0	NA	0
1307		Feature_-_184.9671_19.4	184.967	-	184.967	0	19.39	0.42	0	-	-	-	-	-	-	-	-	-	-	-	-	NA	0	NA	0	NA	0
1308		Feature_-_184.9671_22.1	184.967	-	184.967	0.5	22.36	0.25	0	-	-	-	-	-	-	-	-	-	-	-	-	NA	0	NA	0	NA	0
7618		Feature_+_148.0965_4.6	148.096	+	148.096	0	4.6	0.1	2	-	-	-	-	-	-	-	1972098	-	1485866	-	-	0.424789	0.15317	0.373901	-0.0195107	0.373901	0.0195107
7231		Feature_+_140.0816_5.0	140.082	+	140.082	0	4.96	0.5	3	553911	346371	-	-	-	-	-	-	-	-	-	335274	0.373901	-0.234124	0.95165	0.0205387	0.570348	-0.358954	0.24386	0.427243	0.0215229
1311		Feature_-_184.9671_23.7	184.967	-	184.967	-0.5	23.45	0.05	0	-	-	-	-	-	-	-	-	-	-	-	-	NA	0	NA	0	NA	0
1312		Feature_-_184.9671_24.2	184.967	-	184.967	0	24.2	0.35	0	-	-	-	-	-	-	-	-	-	-	-	-	NA	0	NA	0	NA	0
1313		Feature_-_184.9671_24.5	184.967	-	184.967	0	24.46	0.46	0	-	-	-	-	-	-	-	-	-	-	-	-	NA	0	NA	0	NA	0
1314		Feature_-_184.9670_11.8	184.967	-	184.967	0	11.83	0.45	0	-	-	-	-	-	-	-	-	-	-	-	-	NA	0	NA	0	NA	0
1315		Feature_-_184.9670_12.3	184.967	-	184.967	0	12.3	0.38	0	-	-	-	-	-	-	-	-	-	-	-	-	NA	0	NA	0	NA	0
1316		Feature_-_184.9670_18.5	184.967	-	184.967	0	18.54	0.46	0	-	-	-	-	-	-	-	-	-	-	-	-	NA	0	NA	0	NA	0
5337		Feature_+_94.9300_24.8	94.93	+	94.93	0	24.58	0.23	12	284729	282098	390076	303637	256008	280187	278195	294357	320835	318938	344540	339505	0.00583533	-0.234121	0.802602	-0.0396235	0.0811972	0.219254	1.09046	2.23393	0.0955
9989		Feature_+_283.0490_10.6	283.049	+	283.049	0	10.59	0.16	12	92332	95070	100529	94367	97078	74237	104842	103003	91231	110290	117551	103893	0.195674	-0.233912	0.0340407	-0.194143	0.0171088	0.241301	1.76678	0.708467	1.468
868		Feature_-_230.9349_23.1	230.935	-	230.935	3	22.97	0.35	12	465444	362922	489212	351196	448439	381915	376164	416946	467336	421874	479324	480601	0.0410211	-0.233856	0.285008	-0.199515	0.992849	0.000605688	0.00311672	1.38699	0.545143
10291		Feature_+_362.8098_23.5	362.81	+	362.81	0	23.47	0.13	12	244617	261802	289128	267108	191082	251669	234182	283857	215335	305119	306447	293497	0.040562	-0.233707	0.035812	-0.14585	0.00613853	0.475285	2.21194	1.39188	1.44597
8132		Feature_+_164.8972_23.4	164.897	+	164.897	0	23.38	0.12	12	130913	117008	115642	140386	87210	105478	98808	120656	85841	116830	140699	124421	0.11771	-0.233202	0.79463	-0.0340689	0.187922	0.329483	0.726021	0.929185	0.0998349
5616		Feature_+_98.9261_23.9	98.9261	+	98.9261	0	23.73	0.28	12	180111	183718	195806	173613	183829	163766	157010	135065	187835	157714	205194	172737	0.181646	-0.232746	0.724376	0.0463597	0.723963	-0.0428029	0.140284	0.740775	0.140036
10555		Feature_+_608.7520_23.4	608.752	+	608.752	0	23.37	0.15	12	88680	99472	139841	115550	81868	93652	94017	132560	83538	113203	130384	132682	0.261427	-0.23266	0.618683	-0.0845023	0.00327057	0.566448	2.48538	0.58265	0.208532
1105		Feature_-_204.9127_24.8	204.913	-	204.913	0.5	24.65	0.26	12	350466	324730	334431	331273	291369	286930	331032	330554	336495	350759	385522	378135	0.037487	-0.232544	0.0195503	-0.170155	0.0938965	0.187895	1.02735	1.42612	1.70885
220		Feature_-_580.6923_23.4	580.692	-	580.692	0	23.4	0.09	12	96921	79375	122966	119012	54031	81825	95901	131889	90211	151362	105537	106783	0.443117	-0.232202	0.529405	-0.178519	0.112161	0.592669	0.950159	0.353482	0.276212
64		Feature_-_800.7672_22.8	800.767	-	800.767	0	22.76	0.45	12	53715	85681	134472	135535	34738	41287	47028	117223	50992	113102	33692	94624	0.744385	-0.232128	0.260486	0.559079	0.240975	0.791837	0.618028	0.128202	0.584216
1327		Feature_-_183.0101_2.6	183.01	-	183.01	0	2.59	0.11	0	-	-	-	-	-	-	-	-	-	-	-	-	NA	0	NA	0	NA	0
1019		Feature_-_220.8272_23.4	220.827	-	220.827	0	23.36	0.1	12	95773	123784	131840	115926	96961	106439	111299	97922	103287	100165	130385	140019	0.220761	-0.231371	0.980924	0.00381417	0.111978	0.324043	0.950868	0.656077	0.00836477
9809		Feature_+_240.8733_23.6	240.873	+	240.873	0	23.55	0.13	12	152523	137962	132579	156086	101633	113797	111826	120554	151579	139824	141097	125428	0.0241628	-0.231209	0.480883	0.0702559	0.99125	0.00218158	0.00381664	1.61685	0.317961
1103		Feature_-_204.9655_23.3	204.965	-	204.965	0	23.29	0.06	12	146766	124537	163480	146041	84309	125820	97050	150197	118981	171942	116669	149228	0.386006	-0.230966	0.951812	-0.0125126	0.292493	0.322815	0.533885	0.413406	0.0214488
8208		Feature_+_165.0878_11.9	165.088	+	165.088	-0.6	12.18	0.23	12	361000	300970	280596	383643	329303	357717	262606	231387	325456	294940	318906	385674	0.350859	-0.230873	0.796936	-0.0503941	0.862834	-0.0232508	0.0640729	0.454867	0.0985766
10569		Feature_+_614.8094_22.9	614.809	+	614.809	0	22.88	0.39	12	383443	354716	421339	362496	315293	380031	317374	408574	366068	504760	401228	391508	0.230297	-0.230406	0.274717	-0.188531	0.135753	0.285142	0.86725	0.637711	0.561115
10757		Feature_+_838.6133_23.6	838.613	+	838.613	0	23.55	0.16	12	124140	115377	130917	136796	124086	130452	109695	130921	116136	158186	126887	150165	0.141731	-0.230121	0.200545	-0.184121	0.0726282	0.256432	1.13889	0.848536	0.697788
1171		Feature_-_194.9073_23.4	194.907	-	194.907	0	23.42	0.42	12	102358	100393	137817	103883	88043	103826	80935	107787	89663	104974	107752	130396	0.220229	-0.230048	0.982134	-0.00433305	0.085179	0.292965	1.06967	0.657125	0.00782926
318		Feature_-_480.7359_23.4	480.736	-	480.736	0	23.39	0.08	12	230104	195102	327698	248359	151762	165270	192399	288931	210221	268810	251210	237967	0.390284	-0.2293	0.916942	0.0248552	0.0927888	0.356364	1.0325	0.408619	0.0376582
68		Feature_-_791.7389_23.1	791.739	-	791.739	-5.6	22.86	0.28	12	386049	301640	513417	384548	404738	406018	275036	465662	426445	519133	413932	410837	0.3796	-0.22892	0.536125	-0.163868	0.322702	0.142824	0.491198	0.420674	0.270734
106		Feature_-_734.7311_23.2	734.731	-	734.731	0	23.2	0.46	12	106418	130567	174096	128629	69628	100910	77124	118843	76704	96119	117704	134102	0.35648	-0.228911	0.198333	0.316563	0.114207	0.461065	0.942309	0.447965	0.702605
867		Feature_-_230.9352_22.6	230.935	-	230.935	-0.4	22.73	0.34	12	427065	386993	431534	409005	411196	420653	417052	437872	482365	577694	414192	502537	0.200804	-0.228439	0.143417	-0.283828	0.327185	0.178367	0.485207	0.697227	0.843401
10747		Feature_+_822.6371_23.6	822.637	+	822.637	0	23.56	0.19	12	99958	91435	121795	83250	80180	73998	86840	111382	73540	113157	98356	107381	0.257158	-0.228304	0.58196	-0.105142	0.0737188	0.330079	1.13242	0.5898	0.235107
10695		Feature_+_738.8090_22.9	738.809	+	738.809	0	22.89	0.41	12	439796	376914	514309	451622	351214	370656	381516	441572	428418	471813	452084	474476	0.0421501	-0.228256	0.67015	-0.0584564	0.10629	0.197545	0.973509	1.3752	0.173828
9823		Feature_+_249.0447_12.8	249.045	+	249.045	0	12.78	0.18	12	652177	589125	647106	455220	648562	549092	641198	506286	730465	701893	708727	576333	0.174056	-0.227932	0.239163	-0.232296	0.785388	-0.0317774	0.104916	0.759311	0.621306
480	Sodium Cluster Adduct	Feature_-_367.8814_22.9	367.881	-	367.881	0	22.87	0.33	12	12880376	12297857	14968494	12059870	11247382	11475106	11653064	11794416	11526470	14229527	13690552	12972931	0.00608775	-0.227694	0.629385	-0.0563627	0.0484227	0.197781	1.31495	2.21554	0.201084
1753		Feature_-_164.9637_22.8	164.964	-	164.964	0	22.83	0.34	12	205611	232252	264593	240432	235899	220541	224768	190966	249693	256271	248216	240533	0.0350224	-0.227629	0.821561	-0.0150724	0.263152	0.10817	0.579793	1.45565	0.0853604
679		Feature_-_296.9068_23.1	296.907	-	296.907	1	22.86	0.27	12	369163	328483	362935	339730	290116	274906	247834	302787	293352	245316	380141	340517	0.337852	-0.226669	0.626474	0.0941952	0.930077	0.0200669	0.0314811	0.471274	0.203097
1345		Feature_-_177.0774_0.4	177.077	-	177.077	0	0.36	0.12	0	-	-	-	-	-	-	-	-	-	-	-	-	NA	0	NA	0	NA	0
1346		Feature_-_175.0617_0.4	175.062	-	175.062	0	0.36	0.18	0	-	-	-	-	-	-	-	-	-	-	-	-	1	0	1	0	1	0
1347		Feature_-_174.9539_11.3	174.954	-	174.954	0	11.35	0.12	0	-	-	-	-	-	-	-	-	-	-	-	-	1	0	1	0	1	0
1348		Feature_-_174.9366_15.1	174.937	-	174.937	-1.7	14.83	0.24	0	-	-	-	-	-	-	-	-	-	-	-	-	NA	0	NA	0	NA	0
1349		Feature_-_174.9364_14.8	174.936	-	174.936	0	14.82	0.25	0	-	-	-	-	-	-	-	-	-	-	-	-	1	0	1	0	1	0
10654		Feature_+_706.7059_23.4	706.706	+	706.706	0	23.43	0.29	12	116214	81874	145734	130054	54279	78264	77465	112416	76134	117835	84102	111781	0.382782	-0.226455	0.539156	0.189129	0.344825	0.347138	0.462401	0.417049	0.268285
412		Feature_-_401.8694_22.6	401.869	-	401.869	1.7	22.83	0.25	12	828537	849091	1020274	924013	681050	892529	713242	902131	942719	1110888	954209	868848	0.204541	-0.226361	0.616698	-0.070831	0.1966	0.258703	0.706416	0.689221	0.209927
2754		Feature_-_116.9584_25.0	116.958	-	116.958	0	24.79	0.25	12	306890	324164	361570	337984	297623	291682	274790	336318	297478	341127	389847	324152	0.132281	-0.224953	0.666112	-0.0435969	0.0625863	0.22623	1.20352	0.878503	0.176452
1353		Feature_-_173.9566_9.7	173.957	-	173.957	0	9.74	0.32	0	-	-	-	-	-	-	-	-	-	-	-	-	NA	0	NA	0	NA	0
1354		Feature_-_173.9566_10.6	173.957	-	173.957	0	10.63	0.3	0	-	-	-	-	-	-	-	-	-	-	-	-	NA	0	NA	0	NA	0
1355		Feature_-_173.9566_11.4	173.957	-	173.957	0	11.41	0.08	0	-	-	-	-	-	-	-	-	-	-	-	-	NA	0	NA	0	NA	0
1356		Feature_-_173.9565_9.4	173.957	-	173.957	1.1	9.57	0.25	0	-	-	-	-	-	-	-	-	-	-	-	-	NA	0	NA	0	NA	0
4623		Feature_+_74.0970_12.3	74.097	+	74.097	0	12.04	0.27	2	-	1791670	-	-	1549058	-	-	-	-	-	-	-	NA	0	0.373901	0.255056	0.373901	-0.166148
1358		Feature_-_172.9572_1.6	172.957	-	172.957	0	1.6	0.47	0	-	-	-	-	-	-	-	-	-	-	-	-	NA	0	NA	0	NA	0
1359		Feature_-_172.9572_2.0	172.957	-	172.957	0	2.04	0.45	0	-	-	-	-	-	-	-	-	-	-	-	-	NA	0	NA	0	NA	0
1360		Feature_-_172.9572_4.3	172.957	-	172.957	-1.2	4.47	0.21	0	-	-	-	-	-	-	-	-	-	-	-	-	NA	0	NA	0	NA	0
1361		Feature_-_172.9572_25.8	172.957	-	172.957	0	25.81	0.42	0	-	-	-	-	-	-	-	-	-	-	-	-	NA	0	NA	0	NA	0
1362		Feature_-_172.9571_3.8	172.957	-	172.957	0	3.79	0.45	0	-	-	-	-	-	-	-	-	-	-	-	-	NA	0	NA	0	NA	0
1363		Feature_-_172.9571_4.6	172.957	-	172.957	-0.6	4.85	0.23	0	-	-	-	-	-	-	-	-	-	-	-	-	NA	0	NA	0	NA	0
1364		Feature_-_172.9571_19.1	172.957	-	172.957	-1.2	18.92	0.26	0	-	-	-	-	-	-	-	-	-	-	-	-	NA	0	NA	0	NA	0
1365		Feature_-_172.9571_19.5	172.957	-	172.957	-1.2	19.26	0.25	0	-	-	-	-	-	-	-	-	-	-	-	-	NA	0	NA	0	NA	0
1366		Feature_-_172.9571_21.3	172.957	-	172.957	-0.6	21.06	0.19	0	-	-	-	-	-	-	-	-	-	-	-	-	NA	0	NA	0	NA	0
1367		Feature_-_172.9571_21.6	172.957	-	172.957	-0.6	21.42	0.17	0	-	-	-	-	-	-	-	-	-	-	-	-	NA	0	NA	0	NA	0
1368		Feature_-_172.9571_21.8	172.957	-	172.957	-0.6	21.59	0.12	0	-	-	-	-	-	-	-	-	-	-	-	-	1	0	1	0	1	0
1369		Feature_-_172.9571_22.5	172.957	-	172.957	0	22.53	0.43	0	-	-	-	-	-	-	-	-	-	-	-	-	NA	0	NA	0	NA	0
1370		Feature_-_172.9571_26.2	172.957	-	172.957	0	26.22	0.44	0	-	-	-	-	-	-	-	-	-	-	-	-	NA	0	NA	0	NA	0
1371		Feature_-_172.9571_26.6	172.957	-	172.957	0	26.4	0.25	0	-	-	-	-	-	-	-	-	-	-	-	-	NA	0	NA	0	NA	0
1372		Feature_-_172.9571_26.9	172.957	-	172.957	0	26.92	0.39	0	-	-	-	-	-	-	-	-	-	-	-	-	NA	0	NA	0	NA	0
1373		Feature_-_172.9570_0.1	172.957	-	172.957	0	0.12	0.24	0	-	-	-	-	-	-	-	-	-	-	-	-	NA	0	NA	0	NA	0
1374		Feature_-_172.9570_3.5	172.957	-	172.957	0.6	3.57	0.3	0	-	-	-	-	-	-	-	-	-	-	-	-	NA	0	NA	0	NA	0
1375		Feature_-_172.9570_4.0	172.957	-	172.957	1.2	4.26	0.27	0	-	-	-	-	-	-	-	-	-	-	-	-	1	0	1	0	1	0
1376		Feature_-_172.9570_4.9	172.957	-	172.957	0	5.06	0.25	0	-	-	-	-	-	-	-	-	-	-	-	-	1	0	1	0	1	0
1377		Feature_-_172.9570_6.2	172.957	-	172.957	0	6.16	0.28	0	-	-	-	-	-	-	-	-	-	-	-	-	NA	0	NA	0	NA	0
1378		Feature_-_172.9570_6.5	172.957	-	172.957	-0.6	6.54	0.42	0	-	-	-	-	-	-	-	-	-	-	-	-	NA	0	NA	0	NA	0
1379		Feature_-_172.9570_6.8	172.957	-	172.957	-0.6	6.97	0.2	0	-	-	-	-	-	-	-	-	-	-	-	-	1	0	1	0	1	0
1380		Feature_-_172.9570_8.0	172.957	-	172.957	0	7.97	0.25	0	-	-	-	-	-	-	-	-	-	-	-	-	1	0	1	0	1	0
1381		Feature_-_172.9570_8.3	172.957	-	172.957	0	8.33	0.31	0	-	-	-	-	-	-	-	-	-	-	-	-	NA	0	NA	0	NA	0
1382		Feature_-_172.9570_8.6	172.957	-	172.957	-0.6	8.79	0.27	0	-	-	-	-	-	-	-	-	-	-	-	-	NA	0	NA	0	NA	0
1383		Feature_-_172.9570_8.9	172.957	-	172.957	0	8.88	0.21	0	-	-	-	-	-	-	-	-	-	-	-	-	NA	0	NA	0	NA	0
1384		Feature_-_172.9570_9.4	172.957	-	172.957	0	9.35	0.4	0	-	-	-	-	-	-	-	-	-	-	-	-	NA	0	NA	0	NA	0
1385		Feature_-_172.9570_10.8	172.957	-	172.957	0	10.81	0.45	0	-	-	-	-	-	-	-	-	-	-	-	-	NA	0	NA	0	NA	0
1386		Feature_-_172.9570_11.1	172.957	-	172.957	-0.6	11.32	0.08	0	-	-	-	-	-	-	-	-	-	-	-	-	NA	0	NA	0	NA	0
1387		Feature_-_172.9570_11.3	172.957	-	172.957	0	11.35	0.08	0	-	-	-	-	-	-	-	-	-	-	-	-	NA	0	NA	0	NA	0
1388		Feature_-_172.9570_11.6	172.957	-	172.957	-0.6	11.41	0.04	0	-	-	-	-	-	-	-	-	-	-	-	-	1	0	1	0	1	0
1389		Feature_-_172.9570_11.9	172.957	-	172.957	0	11.68	0.09	0	-	-	-	-	-	-	-	-	-	-	-	-	NA	0	NA	0	NA	0
1390		Feature_-_172.9570_12.4	172.957	-	172.957	-0.6	12.19	0.15	0	-	-	-	-	-	-	-	-	-	-	-	-	1	0	1	0	1	0
1391		Feature_-_172.9570_12.7	172.957	-	172.957	0	12.48	0.17	0	-	-	-	-	-	-	-	-	-	-	-	-	NA	0	NA	0	NA	0
1392		Feature_-_172.9570_13.0	172.957	-	172.957	-0.6	12.73	0.22	0	-	-	-	-	-	-	-	-	-	-	-	-	NA	0	NA	0	NA	0
1393		Feature_-_172.9570_13.3	172.957	-	172.957	0	13.34	0.39	0	-	-	-	-	-	-	-	-	-	-	-	-	NA	0	NA	0	NA	0
1394		Feature_-_172.9570_13.7	172.957	-	172.957	0	13.55	0.18	0	-	-	-	-	-	-	-	-	-	-	-	-	NA	0	NA	0	NA	0
1395		Feature_-_172.9570_14.4	172.957	-	172.957	-0.6	14.15	0.22	0	-	-	-	-	-	-	-	-	-	-	-	-	NA	0	NA	0	NA	0
1396		Feature_-_172.9570_14.6	172.957	-	172.957	0	14.38	0.21	0	-	-	-	-	-	-	-	-	-	-	-	-	1	0	1	0	1	0
1397		Feature_-_172.9570_15.3	172.957	-	172.957	0	15.3	0.33	0	-	-	-	-	-	-	-	-	-	-	-	-	1	0	1	0	1	0
1398		Feature_-_172.9570_15.6	172.957	-	172.957	0	15.62	0.34	0	-	-	-	-	-	-	-	-	-	-	-	-	NA	0	NA	0	NA	0
1399		Feature_-_172.9570_16.0	172.957	-	172.957	0	15.75	0.21	0	-	-	-	-	-	-	-	-	-	-	-	-	NA	0	NA	0	NA	0
1400		Feature_-_172.9570_16.9	172.957	-	172.957	0	16.91	0.41	0	-	-	-	-	-	-	-	-	-	-	-	-	NA	0	NA	0	NA	0
1401		Feature_-_172.9570_17.2	172.957	-	172.957	0	17	0.26	0	-	-	-	-	-	-	-	-	-	-	-	-	1	0	1	0	1	0
1402		Feature_-_172.9570_17.5	172.957	-	172.957	-0.6	17.35	0.32	0	-	-	-	-	-	-	-	-	-	-	-	-	NA	0	NA	0	NA	0
1403		Feature_-_172.9570_17.8	172.957	-	172.957	0	17.76	0.45	0	-	-	-	-	-	-	-	-	-	-	-	-	NA	0	NA	0	NA	0
1404		Feature_-_172.9570_18.3	172.957	-	172.957	-0.6	18.09	0.24	0	-	-	-	-	-	-	-	-	-	-	-	-	NA	0	NA	0	NA	0
1405		Feature_-_172.9570_18.6	172.957	-	172.957	0	18.8	0.29	0	-	-	-	-	-	-	-	-	-	-	-	-	NA	0	NA	0	NA	0
1406		Feature_-_172.9570_18.9	172.957	-	172.957	0	18.88	0.43	0	-	-	-	-	-	-	-	-	-	-	-	-	NA	0	NA	0	NA	0
1407		Feature_-_172.9570_19.9	172.957	-	172.957	0	19.91	0.43	0	-	-	-	-	-	-	-	-	-	-	-	-	NA	0	NA	0	NA	0
1408		Feature_-_172.9570_20.2	172.957	-	172.957	0	19.93	0.25	0	-	-	-	-	-	-	-	-	-	-	-	-	1	0	1	0	1	0
1409		Feature_-_172.9570_20.4	172.957	-	172.957	0	20.27	0.32	0	-	-	-	-	-	-	-	-	-	-	-	-	NA	0	NA	0	NA	0
1410		Feature_-_172.9570_20.7	172.957	-	172.957	0	20.75	0.32	0	-	-	-	-	-	-	-	-	-	-	-	-	1	0	1	0	1	0
1411		Feature_-_172.9570_22.1	172.957	-	172.957	0	21.92	0.14	0	-	-	-	-	-	-	-	-	-	-	-	-	NA	0	NA	0	NA	0
1412		Feature_-_172.9570_24.8	172.957	-	172.957	0	24.78	0.41	0	-	-	-	-	-	-	-	-	-	-	-	-	NA	0	NA	0	NA	0
1413		Feature_-_172.9569_5.3	172.957	-	172.957	0.6	5.49	0.26	0	-	-	-	-	-	-	-	-	-	-	-	-	NA	0	NA	0	NA	0
1414		Feature_-_172.9569_5.6	172.957	-	172.957	0	5.87	0.17	0	-	-	-	-	-	-	-	-	-	-	-	-	NA	0	NA	0	NA	0
1415		Feature_-_172.9569_5.9	172.957	-	172.957	0	6.07	0.08	0	-	-	-	-	-	-	-	-	-	-	-	-	NA	0	NA	0	NA	0
1416		Feature_-_172.9569_7.0	172.957	-	172.957	0	7.01	0.19	0	-	-	-	-	-	-	-	-	-	-	-	-	NA	0	NA	0	NA	0
1417		Feature_-_172.9569_7.3	172.957	-	172.957	0	7.15	0.12	0	-	-	-	-	-	-	-	-	-	-	-	-	NA	0	NA	0	NA	0
1418		Feature_-_172.9569_7.7	172.957	-	172.957	0.6	7.9	0.09	0	-	-	-	-	-	-	-	-	-	-	-	-	1	0	1	0	1	0
1419		Feature_-_172.9569_9.8	172.957	-	172.957	0	9.82	0.33	0	-	-	-	-	-	-	-	-	-	-	-	-	NA	0	NA	0	NA	0
1420		Feature_-_172.9569_10.1	172.957	-	172.957	0	9.84	0.11	0	-	-	-	-	-	-	-	-	-	-	-	-	NA	0	NA	0	NA	0
1421		Feature_-_172.9569_10.4	172.957	-	172.957	0	10.44	0.46	0	-	-	-	-	-	-	-	-	-	-	-	-	NA	0	NA	0	NA	0
1422		Feature_-_172.9569_12.1	172.957	-	172.957	0.6	11.9	0.24	0	-	-	-	-	-	-	-	-	-	-	-	-	NA	0	NA	0	NA	0
1423		Feature_-_172.9569_14.1	172.957	-	172.957	0	14.08	0.25	0	-	-	-	-	-	-	-	-	-	-	-	-	NA	0	NA	0	NA	0
1424		Feature_-_172.9569_16.3	172.957	-	172.957	0	16.09	0.28	0	-	-	-	-	-	-	-	-	-	-	-	-	1	0	1	0	1	0
1425		Feature_-_172.9569_16.6	172.957	-	172.957	0	16.56	0.47	0	-	-	-	-	-	-	-	-	-	-	-	-	NA	0	NA	0	NA	0
1426		Feature_-_172.9569_18.1	172.957	-	172.957	0.6	17.9	0.33	0	-	-	-	-	-	-	-	-	-	-	-	-	NA	0	NA	0	NA	0
1427		Feature_-_172.9569_21.0	172.957	-	172.957	1.2	20.86	0.29	0	-	-	-	-	-	-	-	-	-	-	-	-	NA	0	NA	0	NA	0
1428		Feature_-_172.9569_24.5	172.957	-	172.957	0	24.53	0.31	0	-	-	-	-	-	-	-	-	-	-	-	-	NA	0	NA	0	NA	0
10480		Feature_+_527.8868_23.1	527.887	+	527.887	-6.3	22.98	0.33	12	320694	285538	277488	318219	297741	289529	274547	315392	282229	365652	308835	353231	0.0779539	-0.224741	0.0833793	-0.221829	0.108327	0.190384	0.965264	1.10816	1.07894
9520		Feature_+_216.8673_23.4	216.867	+	216.867	0	23.4	0.09	12	7969794	7451360	9346545	8094109	6629841	6925910	7592537	8471221	6567656	9161298	8995095	8695073	0.0512898	-0.224015	0.317906	-0.109318	0.0165409	0.343164	1.78144	1.28997	0.497701
4622		Feature_+_74.0970_12.0	74.097	+	74.097	0	11.99	0.43	2	-	1858847	-	-	1549058	-	-	-	-	-	-	-	NA	0	0.373901	0.282863	0.373901	-0.169868
9952		Feature_+_278.8286_23.5	278.829	+	278.829	0	23.52	0.14	12	1244341	1221560	1466319	1405351	1041935	1274074	1172154	1164664	1249017	1315919	1394676	1506640	0.0369431	-0.223942	0.676649	-0.0430577	0.0608837	0.254468	1.2155	1.43247	0.169636
1433		Feature_-_171.1384_9.2	171.138	-	171.138	0	9.16	0.41	0	-	-	-	-	-	-	-	-	-	-	-	-	NA	0	NA	0	NA	0
1434		Feature_-_171.1384_16.2	171.138	-	171.138	-1.2	16.39	0.26	0	-	-	-	-	-	-	-	-	-	-	-	-	1	0	1	0	1	0
1435		Feature_-_171.1384_24.9	171.138	-	171.138	-1.8	25.06	0.23	0	-	-	-	-	-	-	-	-	-	-	-	-	1	0	1	0	1	0
1436		Feature_-_171.1383_0.3	171.138	-	171.138	-1.2	0.05	0.12	0	-	-	-	-	-	-	-	-	-	-	-	-	NA	0	NA	0	NA	0
1437		Feature_-_171.1383_5.8	171.138	-	171.138	0	5.77	0.43	0	-	-	-	-	-	-	-	-	-	-	-	-	1	0	1	0	1	0
1438		Feature_-_171.1383_6.9	171.138	-	171.138	-0.6	6.7	0.26	0	-	-	-	-	-	-	-	-	-	-	-	-	NA	0	NA	0	NA	0
1439		Feature_-_171.1383_8.9	171.138	-	171.138	-1.2	8.64	0.24	0	-	-	-	-	-	-	-	-	-	-	-	-	NA	0	NA	0	NA	0
1440		Feature_-_171.1383_10.5	171.138	-	171.138	0	10.71	0.25	0	-	-	-	-	-	-	-	-	-	-	-	-	NA	0	NA	0	NA	0
1441		Feature_-_171.1383_13.0	171.138	-	171.138	-0.6	12.75	0.24	0	-	-	-	-	-	-	-	-	-	-	-	-	1	0	1	0	1	0
1442		Feature_-_171.1383_17.0	171.138	-	171.138	0	17.05	0.46	0	-	-	-	-	-	-	-	-	-	-	-	-	1	0	1	0	1	0
1443		Feature_-_171.1383_17.5	171.138	-	171.138	-1.2	17.6	0.33	0	-	-	-	-	-	-	-	-	-	-	-	-	NA	0	NA	0	NA	0
1444		Feature_-_171.1383_17.7	171.138	-	171.138	0	17.74	0.45	0	-	-	-	-	-	-	-	-	-	-	-	-	1	0	1	0	1	0
1445		Feature_-_171.1383_19.3	171.138	-	171.138	0	19.14	0.32	0	-	-	-	-	-	-	-	-	-	-	-	-	NA	0	NA	0	NA	0
1446		Feature_-_171.1383_20.0	171.138	-	171.138	0	20.01	0.44	0	-	-	-	-	-	-	-	-	-	-	-	-	NA	0	NA	0	NA	0
1447		Feature_-_171.1383_20.3	171.138	-	171.138	0	20.29	0.44	0	-	-	-	-	-	-	-	-	-	-	-	-	NA	0	NA	0	NA	0
1448		Feature_-_171.1383_24.0	171.138	-	171.138	0	23.96	0.42	0	-	-	-	-	-	-	-	-	-	-	-	-	1	0	1	0	1	0
1449		Feature_-_171.1383_24.6	171.138	-	171.138	0	24.57	0.43	0	-	-	-	-	-	-	-	-	-	-	-	-	NA	0	NA	0	NA	0
1450		Feature_-_171.1383_29.3	171.138	-	171.138	0	29.32	0.46	0	-	-	-	-	-	-	-	-	-	-	-	-	1	0	1	0	1	0
1451		Feature_-_171.1383_29.7	171.138	-	171.138	-0.6	29.88	0.24	0	-	-	-	-	-	-	-	-	-	-	-	-	NA	0	NA	0	NA	0
1452		Feature_-_171.1383_29.9	171.138	-	171.138	0	29.94	0.31	0	-	-	-	-	-	-	-	-	-	-	-	-	NA	0	NA	0	NA	0
1453		Feature_-_171.1382_0.6	171.138	-	171.138	0	0.41	0.27	0	-	-	-	-	-	-	-	-	-	-	-	-	NA	0	NA	0	NA	0
1454		Feature_-_171.1382_1.5	171.138	-	171.138	0.6	1.38	0.34	0	-	-	-	-	-	-	-	-	-	-	-	-	1	0	1	0	1	0
1455		Feature_-_171.1382_1.9	171.138	-	171.138	0	1.93	0.43	0	-	-	-	-	-	-	-	-	-	-	-	-	NA	0	NA	0	NA	0
1456		Feature_-_171.1382_3.1	171.138	-	171.138	0	2.88	0.04	0	-	-	-	-	-	-	-	-	-	-	-	-	NA	0	NA	0	NA	0
1457		Feature_-_171.1382_3.4	171.138	-	171.138	0.6	3.19	0.28	0	-	-	-	-	-	-	-	-	-	-	-	-	NA	0	NA	0	NA	0
1458		Feature_-_171.1382_3.6	171.138	-	171.138	0	3.63	0.42	0	-	-	-	-	-	-	-	-	-	-	-	-	NA	0	NA	0	NA	0
1459		Feature_-_171.1382_4.1	171.138	-	171.138	0	4.12	0.44	0	-	-	-	-	-	-	-	-	-	-	-	-	1	0	1	0	1	0
1460		Feature_-_171.1382_4.9	171.138	-	171.138	0	4.87	0.44	0	-	-	-	-	-	-	-	-	-	-	-	-	1	0	1	0	1	0
1461		Feature_-_171.1382_5.3	171.138	-	171.138	0	5.33	0.39	0	-	-	-	-	-	-	-	-	-	-	-	-	1	0	1	0	1	0
1462		Feature_-_171.1382_6.5	171.138	-	171.138	0	6.54	0.4	0	-	-	-	-	-	-	-	-	-	-	-	-	NA	0	NA	0	NA	0
1463		Feature_-_171.1382_9.9	171.138	-	171.138	0	9.92	0.46	0	-	-	-	-	-	-	-	-	-	-	-	-	1	0	1	0	1	0
1464		Feature_-_171.1382_10.2	171.138	-	171.138	0	10.24	0.4	0	-	-	-	-	-	-	-	-	-	-	-	-	NA	0	NA	0	NA	0
1465		Feature_-_171.1382_10.9	171.138	-	171.138	0	10.87	0.46	0	-	-	-	-	-	-	-	-	-	-	-	-	1	0	1	0	1	0
1466		Feature_-_171.1382_11.1	171.138	-	171.138	0	10.88	0.25	0	-	-	-	-	-	-	-	-	-	-	-	-	1	0	1	0	1	0
1467		Feature_-_171.1382_11.4	171.138	-	171.138	0	11.43	0.42	0	-	-	-	-	-	-	-	-	-	-	-	-	NA	0	NA	0	NA	0
1468		Feature_-_171.1382_11.8	171.138	-	171.138	0	12.04	0.26	0	-	-	-	-	-	-	-	-	-	-	-	-	NA	0	NA	0	NA	0
1469		Feature_-_171.1382_12.6	171.138	-	171.138	0	12.62	0.48	0	-	-	-	-	-	-	-	-	-	-	-	-	NA	0	NA	0	NA	0
1470		Feature_-_171.1382_13.4	171.138	-	171.138	0	13.38	0.48	0	-	-	-	-	-	-	-	-	-	-	-	-	NA	0	NA	0	NA	0
1471		Feature_-_171.1382_14.0	171.138	-	171.138	0	14	0.47	0	-	-	-	-	-	-	-	-	-	-	-	-	NA	0	NA	0	NA	0
1472		Feature_-_171.1382_14.4	171.138	-	171.138	0	14.21	0.24	0	-	-	-	-	-	-	-	-	-	-	-	-	NA	0	NA	0	NA	0
1473		Feature_-_171.1382_15.4	171.138	-	171.138	0	15.36	0.44	0	-	-	-	-	-	-	-	-	-	-	-	-	1	0	1	0	1	0
1474		Feature_-_171.1382_15.9	171.138	-	171.138	0	15.92	0.48	0	-	-	-	-	-	-	-	-	-	-	-	-	NA	0	NA	0	NA	0
1475		Feature_-_171.1382_16.8	171.138	-	171.138	0	16.8	0.41	0	-	-	-	-	-	-	-	-	-	-	-	-	NA	0	NA	0	NA	0
1476		Feature_-_171.1382_18.1	171.138	-	171.138	0	18.08	0.39	0	-	-	-	-	-	-	-	-	-	-	-	-	1	0	1	0	1	0
1477		Feature_-_171.1382_18.4	171.138	-	171.138	0	18.4	0.46	0	-	-	-	-	-	-	-	-	-	-	-	-	NA	0	NA	0	NA	0
1478		Feature_-_171.1382_18.7	171.138	-	171.138	0	18.65	0.37	0	-	-	-	-	-	-	-	-	-	-	-	-	NA	0	NA	0	NA	0
1479		Feature_-_171.1382_18.9	171.138	-	171.138	0	18.92	0.44	0	-	-	-	-	-	-	-	-	-	-	-	-	NA	0	NA	0	NA	0
1480		Feature_-_171.1382_19.7	171.138	-	171.138	-0.6	19.51	0.3	0	-	-	-	-	-	-	-	-	-	-	-	-	1	0	1	0	1	0
1481		Feature_-_171.1382_20.8	171.138	-	171.138	0	20.75	0.47	0	-	-	-	-	-	-	-	-	-	-	-	-	NA	0	NA	0	NA	0
1482		Feature_-_171.1382_21.7	171.138	-	171.138	0	21.84	0.34	0	-	-	-	-	-	-	-	-	-	-	-	-	NA	0	NA	0	NA	0
1483		Feature_-_171.1382_22.4	171.138	-	171.138	0	22.44	0.46	0	-	-	-	-	-	-	-	-	-	-	-	-	NA	0	NA	0	NA	0
1484		Feature_-_171.1382_23.2	171.138	-	171.138	0	23.2	0.45	0	-	-	-	-	-	-	-	-	-	-	-	-	NA	0	NA	0	NA	0
1485		Feature_-_171.1382_24.3	171.138	-	171.138	0	24.25	0.46	0	-	-	-	-	-	-	-	-	-	-	-	-	1	0	1	0	1	0
1486		Feature_-_171.1382_25.1	171.138	-	171.138	-0.6	25.15	0.41	0	-	-	-	-	-	-	-	-	-	-	-	-	NA	0	NA	0	NA	0
1487		Feature_-_171.1382_25.4	171.138	-	171.138	0	25.37	0.47	0	-	-	-	-	-	-	-	-	-	-	-	-	NA	0	NA	0	NA	0
1488		Feature_-_171.1382_25.9	171.138	-	171.138	-0.6	25.67	0.26	0	-	-	-	-	-	-	-	-	-	-	-	-	NA	0	NA	0	NA	0
1489		Feature_-_171.1382_26.6	171.138	-	171.138	0	26.43	0.3	0	-	-	-	-	-	-	-	-	-	-	-	-	NA	0	NA	0	NA	0
1490		Feature_-_171.1382_26.9	171.138	-	171.138	0	26.9	0.49	0	-	-	-	-	-	-	-	-	-	-	-	-	NA	0	NA	0	NA	0
1491		Feature_-_171.1382_27.3	171.138	-	171.138	0	27.05	0.25	0	-	-	-	-	-	-	-	-	-	-	-	-	NA	0	NA	0	NA	0
1492		Feature_-_171.1382_28.5	171.138	-	171.138	0	28.47	0.44	0	-	-	-	-	-	-	-	-	-	-	-	-	1	0	1	0	1	0
1493		Feature_-_171.1382_28.7	171.138	-	171.138	0	28.74	0.48	0	-	-	-	-	-	-	-	-	-	-	-	-	NA	0	NA	0	NA	0
1494		Feature_-_171.1382_29.0	171.138	-	171.138	0	29.28	0.25	0	-	-	-	-	-	-	-	-	-	-	-	-	NA	0	NA	0	NA	0
1495		Feature_-_171.1381_1.2	171.138	-	171.138	0	1.19	0.44	0	-	-	-	-	-	-	-	-	-	-	-	-	NA	0	NA	0	NA	0
1496		Feature_-_171.1381_2.3	171.138	-	171.138	0	2.26	0.48	0	-	-	-	-	-	-	-	-	-	-	-	-	NA	0	NA	0	NA	0
1497		Feature_-_171.1381_6.1	171.138	-	171.138	0	6.13	0.43	0	-	-	-	-	-	-	-	-	-	-	-	-	NA	0	NA	0	NA	0
1498		Feature_-_171.1381_7.3	171.138	-	171.138	-0.6	7.54	0.24	0	-	-	-	-	-	-	-	-	-	-	-	-	NA	0	NA	0	NA	0
1499		Feature_-_171.1381_7.7	171.138	-	171.138	0	7.71	0.47	0	-	-	-	-	-	-	-	-	-	-	-	-	NA	0	NA	0	NA	0
1500		Feature_-_171.1381_8.1	171.138	-	171.138	1.8	8.24	0.28	0	-	-	-	-	-	-	-	-	-	-	-	-	1	0	1	0	1	0
1501		Feature_-_171.1381_8.4	171.138	-	171.138	0	8.42	0.47	0	-	-	-	-	-	-	-	-	-	-	-	-	NA	0	NA	0	NA	0
1502		Feature_-_171.1381_12.2	171.138	-	171.138	0	12.2	0.41	0	-	-	-	-	-	-	-	-	-	-	-	-	1	0	1	0	1	0
1503		Feature_-_171.1381_13.7	171.138	-	171.138	1.2	13.83	0.31	0	-	-	-	-	-	-	-	-	-	-	-	-	1	0	1	0	1	0
1504		Feature_-_171.1381_15.6	171.138	-	171.138	0	15.65	0.47	0	-	-	-	-	-	-	-	-	-	-	-	-	NA	0	NA	0	NA	0
1505		Feature_-_171.1381_16.4	171.138	-	171.138	0	16.44	0.41	0	-	-	-	-	-	-	-	-	-	-	-	-	NA	0	NA	0	NA	0
1506		Feature_-_171.1381_21.0	171.138	-	171.138	0	21.03	0.42	0	-	-	-	-	-	-	-	-	-	-	-	-	NA	0	NA	0	NA	0
1507		Feature_-_171.1381_21.3	171.138	-	171.138	0	21.31	0.47	0	-	-	-	-	-	-	-	-	-	-	-	-	1	0	1	0	1	0
1508		Feature_-_171.1381_22.0	171.138	-	171.138	0	21.98	0.47	0	-	-	-	-	-	-	-	-	-	-	-	-	NA	0	NA	0	NA	0
1509		Feature_-_171.1381_22.7	171.138	-	171.138	0	22.66	0.32	0	-	-	-	-	-	-	-	-	-	-	-	-	NA	0	NA	0	NA	0
1510		Feature_-_171.1381_23.6	171.138	-	171.138	0.6	23.39	0.26	0	-	-	-	-	-	-	-	-	-	-	-	-	1	0	1	0	1	0
1511		Feature_-_171.1381_25.6	171.138	-	171.138	0	25.64	0.42	0	-	-	-	-	-	-	-	-	-	-	-	-	NA	0	NA	0	NA	0
1512		Feature_-_171.1381_26.2	171.138	-	171.138	0	26.21	0.49	0	-	-	-	-	-	-	-	-	-	-	-	-	NA	0	NA	0	NA	0
1513		Feature_-_171.1381_27.6	171.138	-	171.138	0.6	27.64	0.3	0	-	-	-	-	-	-	-	-	-	-	-	-	NA	0	NA	0	NA	0
1514		Feature_-_171.1381_27.9	171.138	-	171.138	0	27.87	0.45	0	-	-	-	-	-	-	-	-	-	-	-	-	NA	0	NA	0	NA	0
1515		Feature_-_171.1381_28.2	171.138	-	171.138	0.6	28.28	0.34	0	-	-	-	-	-	-	-	-	-	-	-	-	NA	0	NA	0	NA	0
1516		Feature_-_171.1380_0.0	171.138	-	171.138	0	0.03	0.15	0	-	-	-	-	-	-	-	-	-	-	-	-	NA	0	NA	0	NA	0
1517		Feature_-_171.1380_0.9	171.138	-	171.138	0	0.89	0.42	0	-	-	-	-	-	-	-	-	-	-	-	-	NA	0	NA	0	NA	0
1518		Feature_-_171.1380_2.5	171.138	-	171.138	1.2	2.77	0.04	0	-	-	-	-	-	-	-	-	-	-	-	-	NA	0	NA	0	NA	0
1519		Feature_-_171.1380_2.9	171.138	-	171.138	0	2.85	0.09	0	-	-	-	-	-	-	-	-	-	-	-	-	NA	0	NA	0	NA	0
1520		Feature_-_171.1380_4.6	171.138	-	171.138	0	4.6	0.46	0	-	-	-	-	-	-	-	-	-	-	-	-	NA	0	NA	0	NA	0
1521		Feature_-_171.1380_9.6	171.138	-	171.138	0	9.63	0.45	0	-	-	-	-	-	-	-	-	-	-	-	-	NA	0	NA	0	NA	0
1522		Feature_-_171.1380_14.9	171.138	-	171.138	0	14.86	0.39	0	-	-	-	-	-	-	-	-	-	-	-	-	1	0	1	0	1	0
1523		Feature_-_171.1018_0.1	171.102	-	171.102	0	0.12	0.1	0	-	-	-	-	-	-	-	-	-	-	-	-	NA	0	NA	0	NA	0
1524		Feature_-_171.1017_3.2	171.102	-	171.102	0	3.16	0.05	0	-	-	-	-	-	-	-	-	-	-	-	-	NA	0	NA	0	NA	0
1525		Feature_-_171.0668_0.3	171.067	-	171.067	0	0.32	0.16	0	-	-	-	-	-	-	-	-	-	-	-	-	NA	0	NA	0	NA	0
1526		Feature_-_171.0654_8.3	171.065	-	171.065	0	8.35	0.18	0	-	-	-	-	-	-	-	-	-	-	-	-	NA	0	NA	0	NA	0
1527		Feature_-_171.0193_0.1	171.019	-	171.019	0	0.15	0.05	0	-	-	-	-	-	-	-	-	-	-	-	-	NA	0	NA	0	NA	0
893		Feature_-_228.9312_22.4	228.931	-	228.931	0	22.66	0.23	12	38563588	40897440	43840952	41582656	33140274	34725480	31856688	42967032	31899524	46725652	34004952	47213772	0.324079	-0.223938	0.908353	-0.0184217	0.165099	0.304446	0.782255	0.48935	0.0417456
772		Feature_-_260.8794_23.6	260.879	-	260.879	0	23.36	0.26	12	2647754	2564586	4274084	2065745	2333572	2772346	3037807	2690939	2890252	3681403	3536144	2709262	0.212103	-0.223682	0.66658	-0.156809	0.11645	0.334677	0.933861	0.673454	0.176148
96		Feature_-_746.7531_22.9	746.753	-	746.753	0	22.86	0.29	12	60340	102311	52295	79728	37698	44730	77879	53529	46809	45292	43362	117003	0.726128	-0.223534	0.751836	0.188326	0.464765	0.50571	0.332767	0.138987	0.123877
118		Feature_-_718.7607_22.6	718.761	-	718.761	-1	22.83	0.18	12	1734114	1349883	1802828	1643837	1348615	1428493	1525095	1515223	1690632	1833180	1757014	1624269	0.0220031	-0.222628	0.394168	-0.120522	0.341498	0.127513	0.466611	1.65752	0.404319
757		Feature_-_268.7999_10.2	268.8	-	268.8	0	10.17	0.09	12	103650	94476	105905	107970	94330	83815	98256	87540	76589	113235	92853	108380	0.117598	-0.222034	0.797678	-0.0283397	0.255844	0.195744	0.592024	0.929599	0.0981723
8179		Feature_+_165.0876_14.5	165.088	+	165.088	0.6	14.75	0.24	12	2431900	2120934	2346324	2232025	2209678	2101538	2063482	2023737	2452469	2448164	2513862	2255075	0.0132647	-0.22177	0.163662	-0.107413	0.727867	0.0248106	0.137948	1.8773	0.786052
5905		Feature_+_107.0656_7.8	107.066	+	107.066	0	7.83	0.13	12	111317	103993	98052	103018	102422	88292	106626	98953	116972	118640	120885	103164	0.102109	-0.221717	0.0993223	-0.167793	0.598808	0.0513289	0.222712	0.990935	1.00295
7930		Feature_+_160.9011_24.1	160.901	+	160.901	-0.6	23.92	0.09	12	5836896	5483671	7341605	5991466	5286352	5292083	5915182	5934156	5883744	6027461	7452254	6507423	0.112994	-0.221585	0.604349	-0.087055	0.0971399	0.232944	1.0126	0.946944	0.218712
8180		Feature_+_165.0876_16.2	165.088	+	165.088	0	16.19	0.46	12	2041603	1854123	2122627	1946994	1824780	1723873	1920240	1765752	2183014	2148532	2198407	1960865	0.0331667	-0.221545	0.2972	-0.0906285	0.534265	0.0603465	0.272243	1.4793	0.526951
7926		Feature_+_160.8641_23.4	160.864	+	160.864	0	23.4	0.11	12	218774	171678	244932	226489	164844	172859	192066	225757	184314	225949	225598	237036	0.109541	-0.221249	0.534178	-0.0985897	0.0681216	0.277912	1.16672	0.960422	0.272314
10037		Feature_+_300.8117_23.7	300.812	+	300.812	-5	23.44	0.05	12	449211	453598	521143	556022	261355	352562	448068	481359	326508	528300	480975	484995	0.163113	-0.221057	0.736131	0.0348101	0.0559111	0.526922	1.2525	0.787511	0.133045
8193	Histidine Internal Standard	Feature_+_165.0877_14.0	165.088	+	165.088	0	14.2	0.24	12	2228058	2000912	2077451	2116750	1924557	1896580	1828177	1811126	2150834	2170296	2161795	2116007	0.000611718	-0.22006	0.0904602	-0.0577431	0.630125	0.0327322	0.200573	3.21345	1.04354
10714		Feature_+_769.8092_22.7	769.809	+	769.809	-1.4	22.75	0.41	12	263918	260102	326397	253481	217351	261828	225984	232607	250471	326062	243489	269488	0.213406	-0.219902	0.993021	0.00161711	0.270996	0.197407	0.567038	0.670793	0.00304166
2077		Feature_-_151.9566_23.0	151.957	-	151.957	0	23.03	0.41	12	49466	138753	47174	121165	109909	138038	36590	33683	33039	99934	35636	107010	0.795044	-0.219722	0.583392	0.34021	0.634856	0.334247	0.197325	0.0996087	0.234039
3209		Feature_-_98.9655_14.4	98.9655	-	98.9655	0	14.41	0.47	10	115376	100967	104421	112089	-	84187	-	117113	92432	112576	96961	119947	0.307959	-0.219312	0.62326	-0.0535563	0.329957	0.186513	0.481542	0.511507	0.205331
5751		Feature_+_102.9744_23.0	102.974	+	102.974	0	22.98	0.24	12	141459	121323	153003	120205	99601	125784	127609	108821	148015	130850	163525	127281	0.201915	-0.219224	0.59703	-0.0959278	0.599127	0.116018	0.222481	0.694831	0.224004
10609		Feature_+_658.7713_23.1	658.771	+	658.771	0	22.92	0.27	12	355659	332382	475818	314775	291616	342296	372827	374257	437086	447799	439464	380678	0.0648728	-0.21898	0.430785	-0.175162	0.263656	0.225642	0.578963	1.18794	0.365739
3349		Feature_-_95.9847_10.6	95.9847	-	95.9847	0	10.55	0.42	12	134282	119862	143631	163894	138486	120050	113895	147753	129060	131151	156503	156583	0.195266	-0.218898	0.731846	-0.0557865	0.187099	0.144751	0.727927	0.709373	0.13558
414		Feature_-_401.3691_22.9	401.369	-	401.369	0	22.93	0.4	12	697857	674701	801985	923187	626013	740153	695402	757984	868604	837291	768649	946583	0.0954266	-0.218664	0.596081	-0.0889659	0.247267	0.219364	0.606835	1.02033	0.224695
8320		Feature_+_168.9058_22.8	168.906	+	168.906	0	22.84	0.34	12	358477	333868	351841	314061	300884	333010	321958	316128	360360	370485	359063	400308	0.0162287	-0.218453	0.0577056	-0.176471	0.186729	0.147964	0.728787	1.78972	1.23878
4231		Feature_-_82.9529_6.7	82.9529	-	82.9529	0	6.5	0.02	1	-	-	-	-	-	-	-	-	-	1173601	-	-	0.373901	-0.0942859	0.373901	-0.0942859	0.373901	0.0942859
10394		Feature_+_425.8657_22.9	425.866	+	425.866	0	22.88	0.37	12	88374	89450	77171	75865	76437	80930	86718	84372	82248	97245	117944	77999	0.304324	-0.218288	0.241991	-0.273925	0.270578	0.24697	0.567708	0.516664	0.616201
4230		Feature_-_82.9529_6.5	82.9529	-	82.9529	0	6.47	0.05	1	-	-	-	-	-	-	-	-	-	1285328	-	-	0.373901	-0.0186837	0.373901	-0.0186837	0.373901	0.0186837
1551		Feature_-_166.9568_4.0	166.957	-	166.957	-1.8	3.73	0.25	0	-	-	-	-	-	-	-	-	-	-	-	-	NA	0	NA	0	NA	0
1552		Feature_-_166.9568_4.3	166.957	-	166.957	0	4.31	0.46	0	-	-	-	-	-	-	-	-	-	-	-	-	NA	0	NA	0	NA	0
1553		Feature_-_166.9567_0.1	166.957	-	166.957	0	0.12	0.15	0	-	-	-	-	-	-	-	-	-	-	-	-	NA	0	NA	0	NA	0
1554		Feature_-_166.9567_2.2	166.957	-	166.957	0	2.22	0.36	0	-	-	-	-	-	-	-	-	-	-	-	-	NA	0	NA	0	NA	0
1555		Feature_-_166.9567_3.7	166.957	-	166.957	-0.6	3.44	0.25	0	-	-	-	-	-	-	-	-	-	-	-	-	1	0	1	0	1	0
1556		Feature_-_166.9567_5.8	166.957	-	166.957	-0.6	5.88	0.32	0	-	-	-	-	-	-	-	-	-	-	-	-	NA	0	NA	0	NA	0
1557		Feature_-_166.9566_1.1	166.957	-	166.957	0	1.09	0.48	0	-	-	-	-	-	-	-	-	-	-	-	-	NA	0	NA	0	NA	0
1558		Feature_-_166.9566_1.4	166.957	-	166.957	0	1.38	0.46	0	-	-	-	-	-	-	-	-	-	-	-	-	NA	0	NA	0	NA	0
1559		Feature_-_166.9566_1.8	166.957	-	166.957	0	1.78	0.38	0	-	-	-	-	-	-	-	-	-	-	-	-	NA	0	NA	0	NA	0
1560		Feature_-_166.9566_6.1	166.957	-	166.957	0	6.11	0.47	0	-	-	-	-	-	-	-	-	-	-	-	-	NA	0	NA	0	NA	0
1561		Feature_-_166.9566_6.4	166.957	-	166.957	-0.6	6.5	0.38	0	-	-	-	-	-	-	-	-	-	-	-	-	NA	0	NA	0	NA	0
1562		Feature_-_166.9566_6.7	166.957	-	166.957	0	6.73	0.47	0	-	-	-	-	-	-	-	-	-	-	-	-	NA	0	NA	0	NA	0
1563		Feature_-_166.9566_7.7	166.957	-	166.957	0	7.95	0.25	0	-	-	-	-	-	-	-	-	-	-	-	-	NA	0	NA	0	NA	0
1564		Feature_-_166.9566_8.4	166.957	-	166.957	0	8.6	0.24	0	-	-	-	-	-	-	-	-	-	-	-	-	NA	0	NA	0	NA	0
1565		Feature_-_166.9566_14.7	166.957	-	166.957	-0.6	14.54	0.24	0	-	-	-	-	-	-	-	-	-	-	-	-	1	0	1	0	1	0
1566		Feature_-_166.9566_15.9	166.957	-	166.957	0	15.88	0.47	0	-	-	-	-	-	-	-	-	-	-	-	-	NA	0	NA	0	NA	0
1567		Feature_-_166.9566_16.2	166.957	-	166.957	0	16.16	0.48	0	-	-	-	-	-	-	-	-	-	-	-	-	NA	0	NA	0	NA	0
1568		Feature_-_166.9566_19.0	166.957	-	166.957	-0.6	18.87	0.36	0	-	-	-	-	-	-	-	-	-	-	-	-	NA	0	NA	0	NA	0
1569		Feature_-_166.9566_20.0	166.957	-	166.957	-0.6	19.87	0.35	0	-	-	-	-	-	-	-	-	-	-	-	-	NA	0	NA	0	NA	0
1570		Feature_-_166.9566_20.3	166.957	-	166.957	0	20.31	0.41	0	-	-	-	-	-	-	-	-	-	-	-	-	NA	0	NA	0	NA	0
1571		Feature_-_166.9566_25.7	166.957	-	166.957	-0.6	25.43	0.24	0	-	-	-	-	-	-	-	-	-	-	-	-	NA	0	NA	0	NA	0
1572		Feature_-_166.9566_27.2	166.957	-	166.957	0	27.21	0.35	0	-	-	-	-	-	-	-	-	-	-	-	-	NA	0	NA	0	NA	0
1573		Feature_-_166.9566_28.0	166.957	-	166.957	0	27.97	0.44	0	-	-	-	-	-	-	-	-	-	-	-	-	NA	0	NA	0	NA	0
1574		Feature_-_166.9566_28.6	166.957	-	166.957	-0.6	28.39	0.3	0	-	-	-	-	-	-	-	-	-	-	-	-	1	0	1	0	1	0
1575		Feature_-_166.9566_30.0	166.957	-	166.957	-0.6	29.88	0.24	0	-	-	-	-	-	-	-	-	-	-	-	-	1	0	1	0	1	0
1576		Feature_-_166.9565_3.3	166.957	-	166.957	0	3.34	0.26	0	-	-	-	-	-	-	-	-	-	-	-	-	1	0	1	0	1	0
1577		Feature_-_166.9565_8.1	166.957	-	166.957	0.6	8.31	0.25	0	-	-	-	-	-	-	-	-	-	-	-	-	NA	0	NA	0	NA	0
1578		Feature_-_166.9565_8.7	166.957	-	166.957	0	8.71	0.47	0	-	-	-	-	-	-	-	-	-	-	-	-	NA	0	NA	0	NA	0
1579		Feature_-_166.9565_9.2	166.957	-	166.957	0	9.2	0.48	0	-	-	-	-	-	-	-	-	-	-	-	-	NA	0	NA	0	NA	0
1580		Feature_-_166.9565_10.2	166.957	-	166.957	0	10.38	0.3	0	-	-	-	-	-	-	-	-	-	-	-	-	NA	0	NA	0	NA	0
1581		Feature_-_166.9565_10.5	166.957	-	166.957	0.6	10.7	0.29	0	-	-	-	-	-	-	-	-	-	-	-	-	NA	0	NA	0	NA	0
1582		Feature_-_166.9565_10.8	166.957	-	166.957	0	10.81	0.28	0	-	-	-	-	-	-	-	-	-	-	-	-	NA	0	NA	0	NA	0
1583		Feature_-_166.9565_11.1	166.957	-	166.957	-0.6	11	0.32	0	-	-	-	-	-	-	-	-	-	-	-	-	NA	0	NA	0	NA	0
1584		Feature_-_166.9565_11.4	166.957	-	166.957	-0.6	11.51	0.37	0	-	-	-	-	-	-	-	-	-	-	-	-	NA	0	NA	0	NA	0
1585		Feature_-_166.9565_11.7	166.957	-	166.957	0.6	12	0.25	0	-	-	-	-	-	-	-	-	-	-	-	-	NA	0	NA	0	NA	0
1586		Feature_-_166.9565_12.1	166.957	-	166.957	0	12.26	0.27	0	-	-	-	-	-	-	-	-	-	-	-	-	NA	0	NA	0	NA	0
1587		Feature_-_166.9565_12.5	166.957	-	166.957	0	12.49	0.42	0	-	-	-	-	-	-	-	-	-	-	-	-	NA	0	NA	0	NA	0
1588		Feature_-_166.9565_13.4	166.957	-	166.957	0	13.37	0.46	0	-	-	-	-	-	-	-	-	-	-	-	-	1	0	1	0	1	0
1589		Feature_-_166.9565_13.9	166.957	-	166.957	0	13.87	0.47	0	-	-	-	-	-	-	-	-	-	-	-	-	1	0	1	0	1	0
1590		Feature_-_166.9565_15.5	166.957	-	166.957	0	15.48	0.32	0	-	-	-	-	-	-	-	-	-	-	-	-	NA	0	NA	0	NA	0
1591		Feature_-_166.9565_16.4	166.957	-	166.957	-0.6	16.66	0.24	0	-	-	-	-	-	-	-	-	-	-	-	-	NA	0	NA	0	NA	0
1592		Feature_-_166.9565_16.8	166.957	-	166.957	0	16.82	0.43	0	-	-	-	-	-	-	-	-	-	-	-	-	NA	0	NA	0	NA	0
1593		Feature_-_166.9565_17.1	166.957	-	166.957	0	16.98	0.36	0	-	-	-	-	-	-	-	-	-	-	-	-	NA	0	NA	0	NA	0
1594		Feature_-_166.9565_18.1	166.957	-	166.957	0	18.06	0.45	0	-	-	-	-	-	-	-	-	-	-	-	-	NA	0	NA	0	NA	0
1595		Feature_-_166.9565_18.4	166.957	-	166.957	0	18.36	0.46	0	-	-	-	-	-	-	-	-	-	-	-	-	NA	0	NA	0	NA	0
1596		Feature_-_166.9565_18.7	166.957	-	166.957	0	18.74	0.36	0	-	-	-	-	-	-	-	-	-	-	-	-	NA	0	NA	0	NA	0
1597		Feature_-_166.9565_19.3	166.957	-	166.957	0	19.51	0.24	0	-	-	-	-	-	-	-	-	-	-	-	-	NA	0	NA	0	NA	0
1598		Feature_-_166.9565_20.8	166.957	-	166.957	0	20.81	0.49	0	-	-	-	-	-	-	-	-	-	-	-	-	NA	0	NA	0	NA	0
1599		Feature_-_166.9565_21.2	166.957	-	166.957	0	21.3	0.25	0	-	-	-	-	-	-	-	-	-	-	-	-	NA	0	NA	0	NA	0
1600		Feature_-_166.9565_21.5	166.957	-	166.957	0	21.71	0.08	0	-	-	-	-	-	-	-	-	-	-	-	-	NA	0	NA	0	NA	0
1601		Feature_-_166.9565_24.8	166.957	-	166.957	0	24.82	0.49	0	-	-	-	-	-	-	-	-	-	-	-	-	NA	0	NA	0	NA	0
1602		Feature_-_166.9565_25.1	166.957	-	166.957	0	24.93	0.3	0	-	-	-	-	-	-	-	-	-	-	-	-	NA	0	NA	0	NA	0
1603		Feature_-_166.9565_25.9	166.957	-	166.957	0	25.89	0.35	0	-	-	-	-	-	-	-	-	-	-	-	-	NA	0	NA	0	NA	0
1604		Feature_-_166.9565_26.6	166.957	-	166.957	0	26.4	0.27	0	-	-	-	-	-	-	-	-	-	-	-	-	NA	0	NA	0	NA	0
1605		Feature_-_166.9565_26.9	166.957	-	166.957	0	26.77	0.29	0	-	-	-	-	-	-	-	-	-	-	-	-	NA	0	NA	0	NA	0
1606		Feature_-_166.9565_27.5	166.957	-	166.957	-0.6	27.25	0.25	0	-	-	-	-	-	-	-	-	-	-	-	-	NA	0	NA	0	NA	0
1607		Feature_-_166.9565_28.3	166.957	-	166.957	0	28.25	0.48	0	-	-	-	-	-	-	-	-	-	-	-	-	NA	0	NA	0	NA	0
1608		Feature_-_166.9565_29.3	166.957	-	166.957	0	29.35	0.48	0	-	-	-	-	-	-	-	-	-	-	-	-	NA	0	NA	0	NA	0
1609		Feature_-_166.9565_29.8	166.957	-	166.957	-0.6	29.55	0.24	0	-	-	-	-	-	-	-	-	-	-	-	-	1	0	1	0	1	0
1610		Feature_-_166.9564_5.2	166.956	-	166.956	0	5.19	0.35	0	-	-	-	-	-	-	-	-	-	-	-	-	NA	0	NA	0	NA	0
1611		Feature_-_166.9564_7.1	166.956	-	166.956	0	7.09	0.38	0	-	-	-	-	-	-	-	-	-	-	-	-	NA	0	NA	0	NA	0
1612		Feature_-_166.9564_9.7	166.956	-	166.956	0	9.66	0.34	0	-	-	-	-	-	-	-	-	-	-	-	-	NA	0	NA	0	NA	0
1613		Feature_-_166.9564_9.9	166.956	-	166.956	0	9.94	0.24	0	-	-	-	-	-	-	-	-	-	-	-	-	NA	0	NA	0	NA	0
1614		Feature_-_166.9564_12.8	166.956	-	166.956	0	12.75	0.38	0	-	-	-	-	-	-	-	-	-	-	-	-	1	0	1	0	1	0
1615		Feature_-_166.9564_13.1	166.956	-	166.956	0	13.19	0.4	0	-	-	-	-	-	-	-	-	-	-	-	-	NA	0	NA	0	NA	0
1616		Feature_-_166.9564_14.2	166.956	-	166.956	0.6	14.05	0.24	0	-	-	-	-	-	-	-	-	-	-	-	-	NA	0	NA	0	NA	0
1617		Feature_-_166.9564_14.5	166.956	-	166.956	0	14.25	0.23	0	-	-	-	-	-	-	-	-	-	-	-	-	NA	0	NA	0	NA	0
1618		Feature_-_166.9564_15.2	166.956	-	166.956	0.6	15.46	0.13	0	-	-	-	-	-	-	-	-	-	-	-	-	NA	0	NA	0	NA	0
1619		Feature_-_166.9564_17.3	166.956	-	166.956	0.6	17.5	0.34	0	-	-	-	-	-	-	-	-	-	-	-	-	NA	0	NA	0	NA	0
1620		Feature_-_166.9564_17.7	166.956	-	166.956	0	17.72	0.42	0	-	-	-	-	-	-	-	-	-	-	-	-	NA	0	NA	0	NA	0
1621		Feature_-_166.9564_19.7	166.956	-	166.956	0	19.73	0.46	0	-	-	-	-	-	-	-	-	-	-	-	-	NA	0	NA	0	NA	0
1622		Feature_-_166.9564_20.6	166.956	-	166.956	0.6	20.32	0.25	0	-	-	-	-	-	-	-	-	-	-	-	-	NA	0	NA	0	NA	0
1623		Feature_-_166.9564_21.7	166.956	-	166.956	-0.6	21.96	0.12	0	-	-	-	-	-	-	-	-	-	-	-	-	NA	0	NA	0	NA	0
1624		Feature_-_166.9564_22.0	166.956	-	166.956	0	21.98	0.29	0	-	-	-	-	-	-	-	-	-	-	-	-	NA	0	NA	0	NA	0
100		Feature_-_738.7549_22.9	738.755	-	738.755	0	22.86	0.3	12	873510	593645	581220	626542	643686	525923	530468	799338	749790	757250	650478	750406	0.356309	-0.217798	0.0326366	-0.26066	0.653154	-0.070991	0.184985	0.448173	1.48629
10544		Feature_+_592.8020_22.8	592.802	+	592.802	0	22.84	0.31	12	295965	330695	375204	379230	330663	347626	293208	333400	331114	374121	375794	383049	0.0328325	-0.217762	0.369718	-0.0622355	0.00813973	0.242393	2.08939	1.4837	0.43213
1627		Feature_-_166.9564_23.9	166.956	-	166.956	0	23.68	0.24	0	-	-	-	-	-	-	-	-	-	-	-	-	1	0	1	0	1	0
1628		Feature_-_166.9564_24.2	166.956	-	166.956	0	24.21	0.25	0	-	-	-	-	-	-	-	-	-	-	-	-	NA	0	NA	0	NA	0
1629		Feature_-_166.9564_25.4	166.956	-	166.956	0	25.35	0.44	0	-	-	-	-	-	-	-	-	-	-	-	-	NA	0	NA	0	NA	0
1630		Feature_-_166.9564_26.2	166.956	-	166.956	0	26.19	0.46	0	-	-	-	-	-	-	-	-	-	-	-	-	NA	0	NA	0	NA	0
1631		Feature_-_166.9564_29.0	166.956	-	166.956	0.6	28.77	0.23	0	-	-	-	-	-	-	-	-	-	-	-	-	NA	0	NA	0	NA	0
10487		Feature_+_530.8257_22.9	530.826	+	530.826	0	22.91	0.35	12	476091	477097	476972	510910	410126	399047	481821	479120	488828	577420	547393	456504	0.179263	-0.217533	0.365897	-0.110247	0.191335	0.201648	0.718205	0.74651	0.436641
1633		Feature_-_166.9563_23.6	166.956	-	166.956	0.6	23.4	0.04	0	-	-	-	-	-	-	-	-	-	-	-	-	NA	0	NA	0	NA	0
1634		Feature_-_166.9563_24.5	166.956	-	166.956	0	24.33	0.26	0	-	-	-	-	-	-	-	-	-	-	-	-	NA	0	NA	0	NA	0
7915		Feature_+_159.0651_2.7	159.065	+	159.065	0	2.73	0.09	4	-	-	-	133708	-	-	-	201909	-	128110	-	236108	0.712821	-0.2175	0.368105	-0.489246	0.251232	0.656595	0.599924	0.147019	0.434028
10586		Feature_+_632.8463_22.7	632.846	+	632.846	-1.1	22.88	0.16	12	1823506	1982279	2029268	1957576	1930396	1896513	1714445	2014380	2057658	2287313	1993212	2259861	0.0758937	-0.217436	0.11866	-0.131857	0.103601	0.17045	0.984636	1.11979	0.925695
10423		Feature_+_460.7679_23.5	460.768	+	460.768	0	23.46	0.17	12	430550	496885	549372	537743	295333	367036	410016	469395	371607	483306	467744	498136	0.0943337	-0.217421	0.0687503	0.12833	0.0431304	0.401035	1.36522	1.02533	1.16273
7876		Feature_+_156.0719_8.3	156.072	+	156.072	-1.3	8.09	0.17	12	2034941	2163336	2476104	1990115	1692781	2064549	2030110	2123254	2227129	2517344	2635486	2075537	0.122695	-0.217239	0.419326	-0.124758	0.140243	0.279604	0.853119	0.911173	0.377448
10658		Feature_+_709.0724_10.6	709.072	+	709.072	0	10.63	0.14	12	1095706	1127082	1348537	1248169	1119508	951163	1039894	1284780	1125383	1210030	1281909	1315988	0.164995	-0.217142	0.713867	-0.0322349	0.00871116	0.1889	2.05992	0.782528	0.146383
10659		Feature_+_709.0727_10.4	709.073	+	709.073	0	10.56	0.1	12	1095706	1127082	1216044	1248169	1119508	951163	1039894	1284780	1125383	1210030	1281909	1315988	0.164995	-0.217142	0.205553	-0.0845017	0.00871116	0.1889	2.05992	0.782528	0.687077
1641		Feature_-_166.0535_14.9	166.054	-	166.054	-0.6	15.17	0.1	0	-	-	-	-	-	-	-	-	-	-	-	-	NA	0	NA	0	NA	0
1642		Feature_-_166.0535_17.1	166.054	-	166.054	0	17.07	0.46	0	-	-	-	-	-	-	-	-	-	-	-	-	NA	0	NA	0	NA	0
1643		Feature_-_166.0535_18.5	166.054	-	166.054	0	18.49	0.49	0	-	-	-	-	-	-	-	-	-	-	-	-	NA	0	NA	0	NA	0
1644		Feature_-_166.0535_21.2	166.054	-	166.054	-1.2	20.91	0.24	0	-	-	-	-	-	-	-	-	-	-	-	-	NA	0	NA	0	NA	0
1645		Feature_-_166.0535_22.7	166.054	-	166.054	0	22.66	0.49	0	-	-	-	-	-	-	-	-	-	-	-	-	NA	0	NA	0	NA	0
1646		Feature_-_166.0535_24.2	166.054	-	166.054	0	24.21	0.32	0	-	-	-	-	-	-	-	-	-	-	-	-	NA	0	NA	0	NA	0
1647		Feature_-_166.0535_26.1	166.054	-	166.054	-0.6	25.82	0.25	0	-	-	-	-	-	-	-	-	-	-	-	-	1	0	1	0	1	0
1648		Feature_-_166.0535_27.1	166.054	-	166.054	0	27.15	0.46	0	-	-	-	-	-	-	-	-	-	-	-	-	NA	0	NA	0	NA	0
1649		Feature_-_166.0535_27.6	166.054	-	166.054	0	27.58	0.48	0	-	-	-	-	-	-	-	-	-	-	-	-	NA	0	NA	0	NA	0
1650		Feature_-_166.0535_28.2	166.054	-	166.054	-0.6	28.42	0.24	0	-	-	-	-	-	-	-	-	-	-	-	-	NA	0	NA	0	NA	0
1651		Feature_-_166.0535_28.5	166.054	-	166.054	0	28.5	0.47	0	-	-	-	-	-	-	-	-	-	-	-	-	NA	0	NA	0	NA	0
1652		Feature_-_166.0535_29.5	166.054	-	166.054	-0.6	29.66	0.28	0	-	-	-	-	-	-	-	-	-	-	-	-	NA	0	NA	0	NA	0
1653		Feature_-_166.0535_29.7	166.054	-	166.054	-1.2	29.89	0.27	0	-	-	-	-	-	-	-	-	-	-	-	-	NA	0	NA	0	NA	0
1654		Feature_-_166.0535_30.0	166.054	-	166.054	0	30	0.24	0	-	-	-	-	-	-	-	-	-	-	-	-	NA	0	NA	0	NA	0
1655		Feature_-_166.0534_0.2	166.053	-	166.053	0.6	0.39	0.14	0	-	-	-	-	-	-	-	-	-	-	-	-	NA	0	NA	0	NA	0
1656		Feature_-_166.0534_0.7	166.053	-	166.053	-0.6	0.76	0.31	0	-	-	-	-	-	-	-	-	-	-	-	-	NA	0	NA	0	NA	0
1657		Feature_-_166.0534_1.4	166.053	-	166.053	0	1.38	0.45	0	-	-	-	-	-	-	-	-	-	-	-	-	1	0	1	0	1	0
1658		Feature_-_166.0534_2.3	166.053	-	166.053	0	2.34	0.22	0	-	-	-	-	-	-	-	-	-	-	-	-	NA	0	NA	0	NA	0
1659		Feature_-_166.0534_5.2	166.053	-	166.053	0	5.18	0.42	0	-	-	-	-	-	-	-	-	-	-	-	-	1	0	1	0	1	0
1660		Feature_-_166.0534_7.2	166.053	-	166.053	0	7.15	0.25	0	-	-	-	-	-	-	-	-	-	-	-	-	NA	0	NA	0	NA	0
1661		Feature_-_166.0534_7.7	166.053	-	166.053	0	7.72	0.26	0	-	-	-	-	-	-	-	-	-	-	-	-	1	0	1	0	1	0
1662		Feature_-_166.0534_9.7	166.053	-	166.053	-0.6	9.51	0.16	0	-	-	-	-	-	-	-	-	-	-	-	-	NA	0	NA	0	NA	0
1663		Feature_-_166.0534_11.2	166.053	-	166.053	-0.6	11.06	0.34	0	-	-	-	-	-	-	-	-	-	-	-	-	NA	0	NA	0	NA	0
1664		Feature_-_166.0534_13.0	166.053	-	166.053	-0.6	12.8	0.25	0	-	-	-	-	-	-	-	-	-	-	-	-	NA	0	NA	0	NA	0
1665		Feature_-_166.0534_14.4	166.053	-	166.053	0	14.24	0.07	0	-	-	-	-	-	-	-	-	-	-	-	-	1	0	1	0	1	0
1666		Feature_-_166.0534_14.7	166.053	-	166.053	0	14.43	0.18	0	-	-	-	-	-	-	-	-	-	-	-	-	NA	0	NA	0	NA	0
1667		Feature_-_166.0534_15.2	166.053	-	166.053	0	15.39	0.16	0	-	-	-	-	-	-	-	-	-	-	-	-	NA	0	NA	0	NA	0
1668		Feature_-_166.0534_15.5	166.053	-	166.053	0	15.65	0.3	0	-	-	-	-	-	-	-	-	-	-	-	-	NA	0	NA	0	NA	0
1669		Feature_-_166.0534_15.9	166.053	-	166.053	0	15.87	0.44	0	-	-	-	-	-	-	-	-	-	-	-	-	NA	0	NA	0	NA	0
1670		Feature_-_166.0534_16.2	166.053	-	166.053	0	16.24	0.38	0	-	-	-	-	-	-	-	-	-	-	-	-	NA	0	NA	0	NA	0
1671		Feature_-_166.0534_16.5	166.053	-	166.053	0	16.55	0.36	0	-	-	-	-	-	-	-	-	-	-	-	-	NA	0	NA	0	NA	0
1672		Feature_-_166.0534_16.8	166.053	-	166.053	-0.6	16.73	0.37	0	-	-	-	-	-	-	-	-	-	-	-	-	1	0	1	0	1	0
1673		Feature_-_166.0534_17.5	166.053	-	166.053	0	17.5	0.4	0	-	-	-	-	-	-	-	-	-	-	-	-	NA	0	NA	0	NA	0
1674		Feature_-_166.0534_17.8	166.053	-	166.053	0.6	17.59	0.27	0	-	-	-	-	-	-	-	-	-	-	-	-	1	0	1	0	1	0
1675		Feature_-_166.0534_18.7	166.053	-	166.053	0	18.75	0.49	0	-	-	-	-	-	-	-	-	-	-	-	-	NA	0	NA	0	NA	0
1676		Feature_-_166.0534_19.1	166.053	-	166.053	0	19.08	0.39	0	-	-	-	-	-	-	-	-	-	-	-	-	NA	0	NA	0	NA	0
1677		Feature_-_166.0534_19.4	166.053	-	166.053	0	19.14	0.25	0	-	-	-	-	-	-	-	-	-	-	-	-	NA	0	NA	0	NA	0
1678		Feature_-_166.0534_19.6	166.053	-	166.053	0	19.62	0.36	0	-	-	-	-	-	-	-	-	-	-	-	-	NA	0	NA	0	NA	0
1679		Feature_-_166.0534_20.2	166.053	-	166.053	0	20.32	0.33	0	-	-	-	-	-	-	-	-	-	-	-	-	NA	0	NA	0	NA	0
1680		Feature_-_166.0534_20.5	166.053	-	166.053	0	20.49	0.48	0	-	-	-	-	-	-	-	-	-	-	-	-	NA	0	NA	0	NA	0
1681		Feature_-_166.0534_21.4	166.053	-	166.053	0	21.41	0.4	0	-	-	-	-	-	-	-	-	-	-	-	-	NA	0	NA	0	NA	0
1682		Feature_-_166.0534_21.8	166.053	-	166.053	0	21.55	0.25	0	-	-	-	-	-	-	-	-	-	-	-	-	NA	0	NA	0	NA	0
1683		Feature_-_166.0534_22.1	166.053	-	166.053	0	22.06	0.46	0	-	-	-	-	-	-	-	-	-	-	-	-	1	0	1	0	1	0
1684		Feature_-_166.0534_23.5	166.053	-	166.053	0.6	23.57	0.27	0	-	-	-	-	-	-	-	-	-	-	-	-	NA	0	NA	0	NA	0
1685		Feature_-_166.0534_23.8	166.053	-	166.053	0	23.8	0.47	0	-	-	-	-	-	-	-	-	-	-	-	-	1	0	1	0	1	0
1686		Feature_-_166.0534_25.1	166.053	-	166.053	0	25.06	0.48	0	-	-	-	-	-	-	-	-	-	-	-	-	NA	0	NA	0	NA	0
1687		Feature_-_166.0534_25.4	166.053	-	166.053	0	25.37	0.49	0	-	-	-	-	-	-	-	-	-	-	-	-	NA	0	NA	0	NA	0
1688		Feature_-_166.0534_25.8	166.053	-	166.053	0	25.8	0.46	0	-	-	-	-	-	-	-	-	-	-	-	-	NA	0	NA	0	NA	0
1689		Feature_-_166.0534_26.3	166.053	-	166.053	0	26.53	0.27	0	-	-	-	-	-	-	-	-	-	-	-	-	NA	0	NA	0	NA	0
1690		Feature_-_166.0534_26.6	166.053	-	166.053	0	26.63	0.42	0	-	-	-	-	-	-	-	-	-	-	-	-	NA	0	NA	0	NA	0
1691		Feature_-_166.0534_26.9	166.053	-	166.053	0	26.63	0.2	0	-	-	-	-	-	-	-	-	-	-	-	-	NA	0	NA	0	NA	0
1692		Feature_-_166.0534_28.9	166.053	-	166.053	0.6	28.66	0.29	0	-	-	-	-	-	-	-	-	-	-	-	-	NA	0	NA	0	NA	0
1693		Feature_-_166.0534_29.1	166.053	-	166.053	0	29.13	0.47	0	-	-	-	-	-	-	-	-	-	-	-	-	NA	0	NA	0	NA	0
1694		Feature_-_166.0533_1.0	166.053	-	166.053	0	1.18	0.26	0	-	-	-	-	-	-	-	-	-	-	-	-	NA	0	NA	0	NA	0
1695		Feature_-_166.0533_2.0	166.053	-	166.053	0	2.04	0.45	0	-	-	-	-	-	-	-	-	-	-	-	-	1	0	1	0	1	0
1696		Feature_-_166.0533_2.8	166.053	-	166.053	0	3	0.21	0	-	-	-	-	-	-	-	-	-	-	-	-	NA	0	NA	0	NA	0
1697		Feature_-_166.0533_3.1	166.053	-	166.053	-0.6	3.33	0.04	0	-	-	-	-	-	-	-	-	-	-	-	-	1	0	1	0	1	0
1698		Feature_-_166.0533_3.4	166.053	-	166.053	0	3.36	0.23	0	-	-	-	-	-	-	-	-	-	-	-	-	NA	0	NA	0	NA	0
1699		Feature_-_166.0533_3.6	166.053	-	166.053	0	3.52	0.21	0	-	-	-	-	-	-	-	-	-	-	-	-	NA	0	NA	0	NA	0
1700		Feature_-_166.0533_4.1	166.053	-	166.053	0	4.08	0.47	0	-	-	-	-	-	-	-	-	-	-	-	-	NA	0	NA	0	NA	0
1701		Feature_-_166.0533_4.4	166.053	-	166.053	0	4.41	0.47	0	-	-	-	-	-	-	-	-	-	-	-	-	1	0	1	0	1	0
1702		Feature_-_166.0533_4.9	166.053	-	166.053	0	4.87	0.49	0	-	-	-	-	-	-	-	-	-	-	-	-	NA	0	NA	0	NA	0
1703		Feature_-_166.0533_5.9	166.053	-	166.053	0	6.12	0.24	0	-	-	-	-	-	-	-	-	-	-	-	-	NA	0	NA	0	NA	0
1704		Feature_-_166.0533_6.2	166.053	-	166.053	0	6.19	0.49	0	-	-	-	-	-	-	-	-	-	-	-	-	NA	0	NA	0	NA	0
1705		Feature_-_166.0533_6.5	166.053	-	166.053	0	6.54	0.39	0	-	-	-	-	-	-	-	-	-	-	-	-	1	0	1	0	1	0
1706		Feature_-_166.0533_6.8	166.053	-	166.053	0	6.82	0.4	0	-	-	-	-	-	-	-	-	-	-	-	-	1	0	1	0	1	0
1707		Feature_-_166.0533_8.1	166.053	-	166.053	0	8.06	0.47	0	-	-	-	-	-	-	-	-	-	-	-	-	NA	0	NA	0	NA	0
1708		Feature_-_166.0533_8.3	166.053	-	166.053	0	8.28	0.32	0	-	-	-	-	-	-	-	-	-	-	-	-	NA	0	NA	0	NA	0
1709		Feature_-_166.0533_8.6	166.053	-	166.053	0	8.48	0.37	0	-	-	-	-	-	-	-	-	-	-	-	-	NA	0	NA	0	NA	0
1710		Feature_-_166.0533_8.9	166.053	-	166.053	0	8.68	0.25	0	-	-	-	-	-	-	-	-	-	-	-	-	NA	0	NA	0	NA	0
1711		Feature_-_166.0533_9.2	166.053	-	166.053	0	8.99	0.12	0	-	-	-	-	-	-	-	-	-	-	-	-	NA	0	NA	0	NA	0
1712		Feature_-_166.0533_9.5	166.053	-	166.053	0	9.31	0.23	0	-	-	-	-	-	-	-	-	-	-	-	-	1	0	1	0	1	0
1713		Feature_-_166.0533_10.0	166.053	-	166.053	0	9.84	0.13	0	-	-	-	-	-	-	-	-	-	-	-	-	NA	0	NA	0	NA	0
1714		Feature_-_166.0533_10.9	166.053	-	166.053	0	10.61	0.25	0	-	-	-	-	-	-	-	-	-	-	-	-	NA	0	NA	0	NA	0
1715		Feature_-_166.0533_11.5	166.053	-	166.053	0	11.31	0.15	0	-	-	-	-	-	-	-	-	-	-	-	-	NA	0	NA	0	NA	0
1716		Feature_-_166.0533_11.8	166.053	-	166.053	-0.6	11.58	0.17	0	-	-	-	-	-	-	-	-	-	-	-	-	NA	0	NA	0	NA	0
1717		Feature_-_166.0533_12.3	166.053	-	166.053	0	12.26	0.47	0	-	-	-	-	-	-	-	-	-	-	-	-	NA	0	NA	0	NA	0
1718		Feature_-_166.0533_12.6	166.053	-	166.053	0.6	12.42	0.22	0	-	-	-	-	-	-	-	-	-	-	-	-	NA	0	NA	0	NA	0
1719		Feature_-_166.0533_13.3	166.053	-	166.053	0	13.27	0.45	0	-	-	-	-	-	-	-	-	-	-	-	-	NA	0	NA	0	NA	0
1720		Feature_-_166.0533_13.8	166.053	-	166.053	0	13.76	0.41	0	-	-	-	-	-	-	-	-	-	-	-	-	NA	0	NA	0	NA	0
1721		Feature_-_166.0533_14.1	166.053	-	166.053	0.6	13.94	0.27	0	-	-	-	-	-	-	-	-	-	-	-	-	NA	0	NA	0	NA	0
1722		Feature_-_166.0533_18.0	166.053	-	166.053	0	18.01	0.37	0	-	-	-	-	-	-	-	-	-	-	-	-	NA	0	NA	0	NA	0
1723		Feature_-_166.0533_20.0	166.053	-	166.053	0.6	19.86	0.38	0	-	-	-	-	-	-	-	-	-	-	-	-	NA	0	NA	0	NA	0
1724		Feature_-_166.0533_20.8	166.053	-	166.053	0	20.82	0.49	0	-	-	-	-	-	-	-	-	-	-	-	-	NA	0	NA	0	NA	0
1725		Feature_-_166.0533_22.3	166.053	-	166.053	0	22.33	0.44	0	-	-	-	-	-	-	-	-	-	-	-	-	1	0	1	0	1	0
1726		Feature_-_166.0533_23.0	166.053	-	166.053	0.6	22.82	0.36	0	-	-	-	-	-	-	-	-	-	-	-	-	NA	0	NA	0	NA	0
1727		Feature_-_166.0533_24.6	166.053	-	166.053	0	24.55	0.41	0	-	-	-	-	-	-	-	-	-	-	-	-	NA	0	NA	0	NA	0
1728		Feature_-_166.0533_24.8	166.053	-	166.053	0	24.81	0.44	0	-	-	-	-	-	-	-	-	-	-	-	-	1	0	1	0	1	0
1729		Feature_-_166.0533_27.9	166.053	-	166.053	0	27.9	0.46	0	-	-	-	-	-	-	-	-	-	-	-	-	NA	0	NA	0	NA	0
1730		Feature_-_166.0532_1.8	166.053	-	166.053	1.2	1.83	0.37	0	-	-	-	-	-	-	-	-	-	-	-	-	1	0	1	0	1	0
1731		Feature_-_166.0532_5.6	166.053	-	166.053	0.6	5.82	0.18	0	-	-	-	-	-	-	-	-	-	-	-	-	NA	0	NA	0	NA	0
1732		Feature_-_166.0532_7.4	166.053	-	166.053	0.6	7.22	0.15	0	-	-	-	-	-	-	-	-	-	-	-	-	1	0	1	0	1	0
1733		Feature_-_166.0532_10.3	166.053	-	166.053	0.6	10.08	0.05	0	-	-	-	-	-	-	-	-	-	-	-	-	NA	0	NA	0	NA	0
1734		Feature_-_166.0532_10.6	166.053	-	166.053	0.6	10.42	0.31	0	-	-	-	-	-	-	-	-	-	-	-	-	NA	0	NA	0	NA	0
1735		Feature_-_166.0531_0.4	166.053	-	166.053	1.8	0.5	0.22	0	-	-	-	-	-	-	-	-	-	-	-	-	NA	0	NA	0	NA	0
1736		Feature_-_166.0219_11.1	166.022	-	166.022	0	11.06	0.13	0	-	-	-	-	-	-	-	-	-	-	-	-	NA	0	NA	0	NA	0
234		Feature_-_568.8287_23.1	568.829	-	568.829	1.8	22.83	0.24	12	359270	302185	464867	516015	429907	329686	435066	507016	503621	462748	489957	525132	0.276559	-0.216652	0.387075	-0.203891	0.246	0.19299	0.609065	0.558212	0.412204
1885		Feature_-_159.9649_23.5	159.965	-	159.965	0	23.51	0.19	12	115916	122073	147929	140539	106637	137410	121406	128417	117282	156030	130443	163419	0.130745	-0.216377	0.356882	-0.132052	0.0253046	0.404744	1.5968	0.883576	0.447476
1186		Feature_-_189.9418_22.6	189.942	-	189.942	-0.5	22.69	0.37	12	768736	778013	703774	733384	807537	685670	735159	699647	817421	864854	792679	805720	0.0127687	-0.216177	0.0557602	-0.153147	0.434461	0.0413261	0.362049	1.89385	1.25368
258		Feature_-_538.3327_22.9	538.333	-	538.333	0	22.93	0.28	12	35505	45870	102013	47035	32556	33245	20534	59434	43102	42757	39261	49491	0.633616	-0.216122	0.323008	0.567706	0.19359	0.242485	0.713118	0.198174	0.490786
8177		Feature_+_165.0876_13.1	165.088	+	165.088	0	13.3	0.29	12	1501555	1470488	1467399	1681356	1495245	1368531	1333800	1270763	1513094	1553692	1457082	1603773	0.0144195	-0.215926	0.985834	0.00146741	0.466248	0.0330955	0.331383	1.84105	0.00619612
8794		Feature_+_184.9199_25.8	184.92	+	184.92	-0.5	25.62	0.26	12	118973	123413	150059	121658	79649	108203	116227	122967	118166	143661	121875	137881	0.0745651	-0.215687	0.818347	-0.0299445	0.117617	0.348754	0.92953	1.12746	0.0870623
9849		Feature_+_250.0507_25.1	250.051	+	250.051	0	24.94	0.28	12	260627	241295	322432	281362	259290	211601	259595	278602	310653	301480	324248	244840	0.262574	-0.215455	0.811022	-0.0428537	0.669942	0.0678552	0.173963	0.580749	0.0909672
135		Feature_-_685.7749_22.5	685.775	-	685.775	0.6	22.76	0.18	12	597202	683570	648834	798893	304662	487778	525735	596646	464300	735567	528244	605664	0.274861	-0.21543	0.312601	0.189098	0.181906	0.452502	0.740154	0.560887	0.50501
10799		Feature_+_937.7745_23.0	937.774	+	937.774	-3.3	22.91	0.35	12	241826	230086	238213	179483	118254	176714	134553	169440	168701	244116	168729	145271	0.472094	-0.215407	0.441535	0.214943	0.844203	0.0778947	0.0735531	0.325972	0.355035
7414		Feature_+_144.9583_23.3	144.958	+	144.958	0	23.28	0.07	12	211369	212045	240926	175508	173544	193655	194704	222053	203913	246924	240608	220976	0.0544989	-0.215001	0.26259	-0.17292	0.046022	0.266943	1.33703	1.26361	0.580722
1747		Feature_-_165.0399_0.1	165.04	-	165.04	0	0.13	0.05	0	-	-	-	-	-	-	-	-	-	-	-	-	NA	0	NA	0	NA	0
1748		Feature_-_165.0398_2.6	165.04	-	165.04	0	2.56	0.32	0	-	-	-	-	-	-	-	-	-	-	-	-	NA	0	NA	0	NA	0
1749		Feature_-_165.0398_2.9	165.04	-	165.04	0	2.88	0.1	0	-	-	-	-	-	-	-	-	-	-	-	-	NA	0	NA	0	NA	0
1750		Feature_-_165.0185_10.9	165.018	-	165.018	-1.2	11.08	0.09	0	-	-	-	-	-	-	-	-	-	-	-	-	NA	0	NA	0	NA	0
1751		Feature_-_165.0183_11.1	165.018	-	165.018	0	11.1	0.12	0	-	-	-	-	-	-	-	-	-	-	-	-	NA	0	NA	0	NA	0
1752		Feature_-_164.9770_3.2	164.977	-	164.977	0	3.16	0.06	0	-	-	-	-	-	-	-	-	-	-	-	-	NA	0	NA	0	NA	0
285		Feature_-_508.8345_23.1	508.834	-	508.834	3.1	22.86	0.25	12	157629	131484	144211	151438	156258	131971	155098	144703	137273	170248	190577	140256	0.223975	-0.214774	0.192317	-0.230358	0.357696	0.151405	0.446486	0.649801	0.715982
3186		Feature_-_99.9690_10.7	99.969	-	99.969	0	10.68	0.28	12	118150	167421	127257	115641	135221	105316	131128	173454	155400	207241	117829	150402	0.541836	-0.214095	0.515415	-0.212614	0.475379	0.218068	0.32296	0.266132	0.287843
10400		Feature_+_436.7235_23.4	436.724	+	436.724	0	23.43	0.14	12	89319	94079	138776	89319	74519	97133	105129	110161	107191	124262	108322	129620	0.0894685	-0.213302	0.476426	-0.168962	0.0561433	0.418355	1.2507	1.04833	0.322005
4342		Feature_-_74.9606_10.0	74.9606	-	74.9606	0	10.03	0.18	12	106949	76328	73756	89970	85481	89789	81454	69736	93158	92398	74846	112104	0.354793	-0.213156	0.332086	-0.218705	0.875522	-0.0318719	0.0577331	0.450025	0.47875
1757		Feature_-_164.0347_6.5	164.035	-	164.035	-2.4	6.68	0.07	0	-	-	-	-	-	-	-	-	-	-	-	-	NA	0	NA	0	NA	0
1758		Feature_-_164.0345_7.0	164.035	-	164.035	-1.2	6.81	0.04	0	-	-	-	-	-	-	-	-	-	-	-	-	NA	0	NA	0	NA	0
1759		Feature_-_164.0343_6.8	164.034	-	164.034	0	6.77	0.1	0	-	-	-	-	-	-	-	-	-	-	-	-	NA	0	NA	0	NA	0
10656		Feature_+_707.0748_10.6	707.075	+	707.075	0	10.59	0.16	12	182199	154562	206125	212590	167178	162265	152940	204685	159153	185276	217296	199975	0.208978	-0.212867	0.659863	-0.0718414	0.0521472	0.244741	1.28277	0.6799	0.180546
8418		Feature_+_169.9794_23.0	169.979	+	169.979	1.8	22.91	0.34	12	214450	281946	245113	296204	251777	242358	235236	295508	298278	312551	280864	302353	0.1258	-0.212466	0.247358	-0.121772	0.167482	0.228599	0.776031	0.900321	0.606674
287		Feature_-_507.8347_22.7	507.835	-	507.835	0	22.69	0.43	12	269519	355228	244864	271346	290937	329407	266801	266638	214095	393547	271362	334768	0.328336	-0.212359	0.427803	-0.198064	0.148945	0.368102	0.826975	0.483682	0.368756
1763		Feature_-_163.0617_1.4	163.062	-	163.062	0	1.31	0.42	0	-	-	-	-	-	-	-	-	-	-	-	-	NA	0	NA	0	NA	0
1764		Feature_-_163.0617_3.2	163.062	-	163.062	0	3.18	0.39	0	-	-	-	-	-	-	-	-	-	-	-	-	NA	0	NA	0	NA	0
1765		Feature_-_163.0617_4.0	163.062	-	163.062	-0.6	4.16	0.29	0	-	-	-	-	-	-	-	-	-	-	-	-	NA	0	NA	0	NA	0
1766		Feature_-_163.0617_4.6	163.062	-	163.062	0	4.64	0.47	0	-	-	-	-	-	-	-	-	-	-	-	-	NA	0	NA	0	NA	0
1767		Feature_-_163.0617_5.0	163.062	-	163.062	0.6	4.82	0.28	0	-	-	-	-	-	-	-	-	-	-	-	-	NA	0	NA	0	NA	0
1768		Feature_-_163.0617_5.3	163.062	-	163.062	0	5.13	0.29	0	-	-	-	-	-	-	-	-	-	-	-	-	NA	0	NA	0	NA	0
1769		Feature_-_163.0616_0.4	163.062	-	163.062	0	0.43	0.16	0	-	-	-	-	-	-	-	-	-	-	-	-	NA	0	NA	0	NA	0
1770		Feature_-_163.0616_0.7	163.062	-	163.062	0.6	0.47	0.24	0	-	-	-	-	-	-	-	-	-	-	-	-	NA	0	NA	0	NA	0
1771		Feature_-_163.0616_1.6	163.062	-	163.062	0	1.63	0.43	0	-	-	-	-	-	-	-	-	-	-	-	-	NA	0	NA	0	NA	0
1772		Feature_-_163.0616_2.1	163.062	-	163.062	0	2.06	0.49	0	-	-	-	-	-	-	-	-	-	-	-	-	NA	0	NA	0	NA	0
1773		Feature_-_163.0616_2.5	163.062	-	163.062	0	2.54	0.33	0	-	-	-	-	-	-	-	-	-	-	-	-	NA	0	NA	0	NA	0
1774		Feature_-_163.0616_2.8	163.062	-	163.062	0.6	2.66	0.31	0	-	-	-	-	-	-	-	-	-	-	-	-	NA	0	NA	0	NA	0
1775		Feature_-_163.0616_3.7	163.062	-	163.062	0	3.71	0.47	0	-	-	-	-	-	-	-	-	-	-	-	-	NA	0	NA	0	NA	0
1776		Feature_-_163.0616_4.3	163.062	-	163.062	0.6	4.48	0.25	0	-	-	-	-	-	-	-	-	-	-	-	-	NA	0	NA	0	NA	0
1777		Feature_-_163.0616_5.6	163.062	-	163.062	0	5.61	0.43	0	-	-	-	-	-	-	-	-	-	-	-	-	NA	0	NA	0	NA	0
1778		Feature_-_163.0614_1.1	163.061	-	163.061	0	1.11	0.48	0	-	-	-	-	-	-	-	-	-	-	-	-	NA	0	NA	0	NA	0
9190		Feature_+_208.0565_8.6	208.056	+	208.056	0	8.62	0.14	12	117062	120125	120439	131678	110115	148423	149871	121560	140368	173183	154285	158872	0.109964	-0.212078	0.0051302	-0.385724	0.0212944	0.404044	1.67174	0.958748	2.28987
180		Feature_-_633.2927_23.0	633.293	-	633.293	1.1	22.86	0.32	12	138517	110810	145758	124900	114000	120957	172848	138156	150660	143919	179731	176680	0.298431	-0.211979	0.0608366	-0.391318	0.108713	0.311467	0.963719	0.525156	1.21583
544		Feature_-_338.8150_23.3	338.815	-	338.815	-1.5	23.54	0.05	12	866366	917420	924384	873270	690706	795871	638596	877509	783005	982561	735135	959850	0.312763	-0.211785	0.884133	0.0200802	0.296856	0.194355	0.527455	0.504785	0.0534822
1782		Feature_-_162.9594_15.2	162.959	-	162.959	-0.6	15.42	0.13	0	-	-	-	-	-	-	-	-	-	-	-	-	NA	0	NA	0	NA	0
1783		Feature_-_162.9593_8.6	162.959	-	162.959	0	8.64	0.48	0	-	-	-	-	-	-	-	-	-	-	-	-	NA	0	NA	0	NA	0
1784		Feature_-_162.9593_9.0	162.959	-	162.959	0	8.97	0.43	0	-	-	-	-	-	-	-	-	-	-	-	-	NA	0	NA	0	NA	0
1785		Feature_-_162.9593_9.4	162.959	-	162.959	0	9.38	0.43	0	-	-	-	-	-	-	-	-	-	-	-	-	NA	0	NA	0	NA	0
1786		Feature_-_162.9593_10.0	162.959	-	162.959	0	9.95	0.33	0	-	-	-	-	-	-	-	-	-	-	-	-	NA	0	NA	0	NA	0
1787		Feature_-_162.9593_11.2	162.959	-	162.959	0	11.2	0.4	0	-	-	-	-	-	-	-	-	-	-	-	-	NA	0	NA	0	NA	0
1788		Feature_-_162.9593_11.7	162.959	-	162.959	0	11.72	0.38	0	-	-	-	-	-	-	-	-	-	-	-	-	1	0	1	0	1	0
1789		Feature_-_162.9593_12.4	162.959	-	162.959	0	12.42	0.46	0	-	-	-	-	-	-	-	-	-	-	-	-	NA	0	NA	0	NA	0
1790		Feature_-_162.9593_16.2	162.959	-	162.959	0	16.24	0.39	0	-	-	-	-	-	-	-	-	-	-	-	-	NA	0	NA	0	NA	0
1791		Feature_-_162.9593_20.0	162.959	-	162.959	-1.2	19.83	0.32	0	-	-	-	-	-	-	-	-	-	-	-	-	1	0	1	0	1	0
1792		Feature_-_162.9592_9.7	162.959	-	162.959	0	9.71	0.44	0	-	-	-	-	-	-	-	-	-	-	-	-	NA	0	NA	0	NA	0
1793		Feature_-_162.9592_10.4	162.959	-	162.959	-0.6	10.6	0.14	0	-	-	-	-	-	-	-	-	-	-	-	-	NA	0	NA	0	NA	0
1794		Feature_-_162.9592_10.7	162.959	-	162.959	0	10.73	0.42	0	-	-	-	-	-	-	-	-	-	-	-	-	NA	0	NA	0	NA	0
1795		Feature_-_162.9592_11.5	162.959	-	162.959	0	11.69	0.19	0	-	-	-	-	-	-	-	-	-	-	-	-	NA	0	NA	0	NA	0
1796		Feature_-_162.9592_12.1	162.959	-	162.959	0	12.08	0.34	0	-	-	-	-	-	-	-	-	-	-	-	-	NA	0	NA	0	NA	0
1797		Feature_-_162.9592_12.7	162.959	-	162.959	0	12.7	0.38	0	-	-	-	-	-	-	-	-	-	-	-	-	NA	0	NA	0	NA	0
1798		Feature_-_162.9592_13.1	162.959	-	162.959	0	13.14	0.38	0	-	-	-	-	-	-	-	-	-	-	-	-	NA	0	NA	0	NA	0
1799		Feature_-_162.9592_13.5	162.959	-	162.959	0	13.47	0.35	0	-	-	-	-	-	-	-	-	-	-	-	-	NA	0	NA	0	NA	0
1800		Feature_-_162.9592_13.8	162.959	-	162.959	0	13.59	0.29	0	-	-	-	-	-	-	-	-	-	-	-	-	NA	0	NA	0	NA	0
1801		Feature_-_162.9592_15.9	162.959	-	162.959	0	15.85	0.41	0	-	-	-	-	-	-	-	-	-	-	-	-	1	0	1	0	1	0
1802		Feature_-_162.9592_16.5	162.959	-	162.959	0	16.75	0.23	0	-	-	-	-	-	-	-	-	-	-	-	-	NA	0	NA	0	NA	0
1803		Feature_-_162.9592_17.0	162.959	-	162.959	0	16.95	0.39	0	-	-	-	-	-	-	-	-	-	-	-	-	NA	0	NA	0	NA	0
1804		Feature_-_162.9592_17.3	162.959	-	162.959	0.6	17.52	0.26	0	-	-	-	-	-	-	-	-	-	-	-	-	1	0	1	0	1	0
1805		Feature_-_162.9592_18.1	162.959	-	162.959	0	18.09	0.43	0	-	-	-	-	-	-	-	-	-	-	-	-	NA	0	NA	0	NA	0
1806		Feature_-_162.9592_18.7	162.959	-	162.959	1.2	18.62	0.32	0	-	-	-	-	-	-	-	-	-	-	-	-	NA	0	NA	0	NA	0
1807		Feature_-_162.9592_19.1	162.959	-	162.959	0	19.05	0.3	0	-	-	-	-	-	-	-	-	-	-	-	-	NA	0	NA	0	NA	0
1808		Feature_-_162.9592_19.3	162.959	-	162.959	-0.6	19.28	0.38	0	-	-	-	-	-	-	-	-	-	-	-	-	NA	0	NA	0	NA	0
1809		Feature_-_162.9592_19.6	162.959	-	162.959	0	19.62	0.45	0	-	-	-	-	-	-	-	-	-	-	-	-	NA	0	NA	0	NA	0
1810		Feature_-_162.9592_20.3	162.959	-	162.959	0	20.31	0.44	0	-	-	-	-	-	-	-	-	-	-	-	-	NA	0	NA	0	NA	0
1811		Feature_-_162.9592_21.0	162.959	-	162.959	0	21.26	0.24	0	-	-	-	-	-	-	-	-	-	-	-	-	NA	0	NA	0	NA	0
1812		Feature_-_162.9592_21.3	162.959	-	162.959	-0.6	21.51	0.13	0	-	-	-	-	-	-	-	-	-	-	-	-	NA	0	NA	0	NA	0
1813		Feature_-_162.9592_25.3	162.959	-	162.959	0	25.33	0.47	0	-	-	-	-	-	-	-	-	-	-	-	-	NA	0	NA	0	NA	0
1814		Feature_-_162.9592_25.6	162.959	-	162.959	-1.8	25.39	0.24	0	-	-	-	-	-	-	-	-	-	-	-	-	NA	0	NA	0	NA	0
1815		Feature_-_162.9592_25.9	162.959	-	162.959	0	25.9	0.44	0	-	-	-	-	-	-	-	-	-	-	-	-	NA	0	NA	0	NA	0
1816		Feature_-_162.9592_27.1	162.959	-	162.959	0	27.08	0.47	0	-	-	-	-	-	-	-	-	-	-	-	-	1	0	1	0	1	0
1817		Feature_-_162.9592_27.8	162.959	-	162.959	0	27.83	0.46	0	-	-	-	-	-	-	-	-	-	-	-	-	NA	0	NA	0	NA	0
1818		Feature_-_162.9592_28.2	162.959	-	162.959	0	28.25	0.47	0	-	-	-	-	-	-	-	-	-	-	-	-	1	0	1	0	1	0
1819		Feature_-_162.9592_28.7	162.959	-	162.959	0	28.7	0.47	0	-	-	-	-	-	-	-	-	-	-	-	-	NA	0	NA	0	NA	0
1820		Feature_-_162.9592_29.2	162.959	-	162.959	0	29.26	0.37	0	-	-	-	-	-	-	-	-	-	-	-	-	NA	0	NA	0	NA	0
1821		Feature_-_162.9592_29.8	162.959	-	162.959	0.6	29.62	0.35	0	-	-	-	-	-	-	-	-	-	-	-	-	NA	0	NA	0	NA	0
1822		Feature_-_162.9592_30.0	162.959	-	162.959	0	29.78	0.23	0	-	-	-	-	-	-	-	-	-	-	-	-	NA	0	NA	0	NA	0
1823		Feature_-_162.9591_14.1	162.959	-	162.959	0	13.96	0.31	0	-	-	-	-	-	-	-	-	-	-	-	-	NA	0	NA	0	NA	0
1824		Feature_-_162.9591_14.4	162.959	-	162.959	0.6	14.15	0.17	0	-	-	-	-	-	-	-	-	-	-	-	-	1	0	1	0	1	0
1825		Feature_-_162.9591_15.5	162.959	-	162.959	1.2	15.65	0.29	0	-	-	-	-	-	-	-	-	-	-	-	-	NA	0	NA	0	NA	0
1826		Feature_-_162.9591_16.8	162.959	-	162.959	0	16.77	0.47	0	-	-	-	-	-	-	-	-	-	-	-	-	1	0	1	0	1	0
1827		Feature_-_162.9591_17.7	162.959	-	162.959	0	17.74	0.44	0	-	-	-	-	-	-	-	-	-	-	-	-	NA	0	NA	0	NA	0
1828		Feature_-_162.9591_18.4	162.959	-	162.959	0	18.45	0.45	0	-	-	-	-	-	-	-	-	-	-	-	-	NA	0	NA	0	NA	0
1829		Feature_-_162.9591_20.7	162.959	-	162.959	0	20.65	0.49	0	-	-	-	-	-	-	-	-	-	-	-	-	1	0	1	0	1	0
942		Feature_-_227.2010_2.7	227.201	-	227.201	0	2.7	0.1	11	485452	-	399542	456008	640138	423300	475845	436327	537090	491749	561798	492804	0.0663286	-0.211518	0.0410745	-0.357273	0.489687	-0.104643	0.310081	1.1783	1.38643
1831		Feature_-_162.9591_24.4	162.959	-	162.959	-0.6	24.33	0.37	0	-	-	-	-	-	-	-	-	-	-	-	-	NA	0	NA	0	NA	0
1832		Feature_-_162.9591_25.0	162.959	-	162.959	-0.6	24.87	0.4	0	-	-	-	-	-	-	-	-	-	-	-	-	NA	0	NA	0	NA	0
1833		Feature_-_162.9591_26.3	162.959	-	162.959	0	26.31	0.42	0	-	-	-	-	-	-	-	-	-	-	-	-	NA	0	NA	0	NA	0
1834		Feature_-_162.9591_26.6	162.959	-	162.959	0	26.45	0.23	0	-	-	-	-	-	-	-	-	-	-	-	-	NA	0	NA	0	NA	0
1835		Feature_-_162.9591_27.4	162.959	-	162.959	0.6	27.19	0.32	0	-	-	-	-	-	-	-	-	-	-	-	-	1	0	1	0	1	0
1836		Feature_-_162.9591_29.5	162.959	-	162.959	0	29.47	0.47	0	-	-	-	-	-	-	-	-	-	-	-	-	1	0	1	0	1	0
1837		Feature_-_162.9590_21.6	162.959	-	162.959	0	21.76	0.08	0	-	-	-	-	-	-	-	-	-	-	-	-	NA	0	NA	0	NA	0
1838		Feature_-_162.9590_21.8	162.959	-	162.959	0	22.04	0.17	0	-	-	-	-	-	-	-	-	-	-	-	-	NA	0	NA	0	NA	0
1839		Feature_-_162.9590_22.1	162.959	-	162.959	0	22.32	0.25	0	-	-	-	-	-	-	-	-	-	-	-	-	NA	0	NA	0	NA	0
7021		Feature_+_137.1032_18.0	137.103	+	137.103	0	18	0.43	12	268384	277976	301780	250378	272968	249530	289269	249358	322493	318309	315084	279194	0.0855706	-0.211479	0.230212	-0.136618	0.489673	0.0791896	0.310094	1.06768	0.637873
1110		Feature_-_204.9126_25.7	204.913	-	204.913	0	25.45	0.23	12	103707	112329	132217	98776	84132	81166	108308	112757	102480	111238	124397	114256	0.209865	-0.211254	0.844924	-0.0273432	0.0566497	0.269267	1.2468	0.67806	0.0731822
209		Feature_-_599.8326_22.8	599.833	-	599.833	0	22.83	0.37	12	178695	169794	262630	111981	148423	169642	185941	162616	136840	246925	169555	183240	0.335086	-0.210783	0.730666	-0.139609	0.167884	0.370295	0.77499	0.474844	0.136281
1843		Feature_-_162.9590_23.7	162.959	-	162.959	0.6	23.5	0.07	0	-	-	-	-	-	-	-	-	-	-	-	-	1	0	1	0	1	0
1844		Feature_-_162.9590_24.1	162.959	-	162.959	0	24.12	0.25	0	-	-	-	-	-	-	-	-	-	-	-	-	NA	0	NA	0	NA	0
1845		Feature_-_162.9590_24.7	162.959	-	162.959	0	24.46	0.29	0	-	-	-	-	-	-	-	-	-	-	-	-	NA	0	NA	0	NA	0
8419		Feature_+_169.9795_22.7	169.98	+	169.98	0	22.72	0.23	12	251062	315935	273977	296204	251777	243601	235236	295508	298278	312551	280864	302353	0.126708	-0.210149	0.843725	-0.0156296	0.158021	0.161112	0.801286	0.897196	0.0737992
10512		Feature_+_553.0573_10.6	553.057	+	553.057	0	10.63	0.18	12	158926	157014	209311	195684	121532	145016	142671	181976	155823	170526	169094	203685	0.222701	-0.210136	0.763005	0.0488309	0.0962173	0.316505	1.01675	0.652278	0.117473
501		Feature_-_357.9065_22.8	357.906	-	357.906	0	22.83	0.48	12	163274	182837	167994	125935	143023	124383	167501	142083	180120	192990	153082	155938	0.274749	-0.210131	0.713528	-0.0744347	0.771683	0.0455225	0.112561	0.561064	0.146589
271		Feature_-_526.8264_23.1	526.826	-	526.826	1.7	22.86	0.26	12	345000	378752	473359	416748	312622	397709	433149	308882	311570	482964	439880	395464	0.254406	-0.209983	0.68164	-0.0551557	0.0134179	0.443833	1.87232	0.594473	0.166445
10627		Feature_+_676.6555_23.6	676.655	+	676.655	0	23.56	0.13	12	142866	166808	212881	170965	152172	153551	170147	159001	166610	202726	185816	169680	0.0786173	-0.209715	0.892571	-0.0196929	0.0522778	0.274046	1.28168	1.10448	0.0493571
316		Feature_-_482.7364_23.4	482.736	-	482.736	0	23.39	0.1	12	74237	70180	131736	81855	68627	73534	84793	86537	71021	105694	84614	92765	0.158889	-0.209193	0.991209	0.00355301	0.0221079	0.404339	1.65545	0.798906	0.00383486
9315		Feature_+_212.1487_3.8	212.149	+	212.149	-0.9	3.57	0.03	2	-	-	-	-	2652547	-	-	-	-	-	1694318	-	0.373901	-0.255148	0.373901	-0.255148	0.602779	-0.321507
8859		Feature_+_196.1256_3.3	196.126	+	196.126	0	3.28	0.05	2	-	-	-	-	2289901	-	-	-	-	-	1165265	-	0.373901	-0.297728	0.373901	-0.297728	0.53721	-0.527759
342		Feature_-_456.8588_23.2	456.859	-	456.859	0	23.21	0.28	12	164178	122026	201031	170185	112465	125245	139571	195759	117174	212213	143717	176286	0.459786	-0.208576	0.690443	-0.109716	0.147859	0.434486	0.830153	0.337444	0.160872
6295		Feature_+_118.0662_6.3	118.066	+	118.066	0	6.3	0.41	12	159239	117399	149614	129009	157409	132366	153206	132382	185432	151485	177288	154154	0.113932	-0.208461	0.0810963	-0.286225	0.628641	-0.0561121	0.201597	0.943353	1.091
6294		Feature_+_118.0662_6.0	118.066	+	118.066	0	6.2	0.33	12	159239	117399	152616	129009	157409	137351	153206	132382	170978	151485	177288	159835	0.0906	-0.208228	0.0808041	-0.292202	0.971821	0.00290243	0.0124139	1.04287	1.09257
10559		Feature_+_610.8643_23.1	610.864	+	610.864	-1	22.88	0.27	12	2082714	2131071	2262919	2217888	2127124	2130918	1867536	2251598	2222665	2675840	2410464	2131366	0.171425	-0.207665	0.280305	-0.126473	0.182609	0.166153	0.738477	0.765925	0.552369
1858		Feature_-_162.9022_4.3	162.902	-	162.902	0	4.31	0.07	0	-	-	-	-	-	-	-	-	-	-	-	-	NA	0	NA	0	NA	0
470		Feature_-_368.8827_22.9	368.883	-	368.883	0	22.86	0.36	12	440543	430754	413004	440415	320985	372323	365112	500781	314368	625499	374740	429557	0.507995	-0.207546	0.56039	-0.15497	0.24413	0.410271	0.612378	0.29414	0.251509
1860		Feature_-_162.0665_0.3	162.066	-	162.066	0	0.32	0.14	0	-	-	-	-	-	-	-	-	-	-	-	-	NA	0	NA	0	NA	0
1861		Feature_-_162.0189_0.1	162.019	-	162.019	0	0.15	0.15	0	-	-	-	-	-	-	-	-	-	-	-	-	NA	0	NA	0	NA	0
1013		Feature_-_220.9458_23.3	220.946	-	220.946	0	23.35	0.07	12	111903	82196	138100	115695	89604	103166	86202	135554	107535	141403	108647	125134	0.387451	-0.207505	0.525271	-0.159176	0.131627	0.279795	0.880655	0.411783	0.279616
204		Feature_-_612.6392_23.6	612.639	-	612.639	0	23.55	0.16	12	115149	138012	106271	104194	103706	93623	105530	120309	87934	134911	118676	115172	0.169768	-0.207034	0.61783	-0.0816148	0.106765	0.265432	0.971573	0.770145	0.209131
10227	Beta-nicotinamide Ribotide In-Source Fragment	Feature_+_340.0463_10.6	340.046	+	340.046	0	10.59	0.27	12	797467	700594	896606	803982	745290	671107	796259	869833	709095	868311	970593	858478	0.153092	-0.206779	0.214618	-0.167815	0.0280613	0.260448	1.55189	0.815048	0.668333
10073		Feature_+_320.9041_22.8	320.904	+	320.904	0	22.84	0.41	12	136684	146002	139327	130507	131595	127618	134162	135397	167372	132177	160949	165116	0.128102	-0.206328	0.278619	-0.140095	0.647021	0.0729368	0.189082	0.892444	0.554989
151		Feature_-_666.2764_23.1	666.276	-	666.276	2.4	22.9	0.3	12	221819	182883	228031	211862	193759	155972	161362	254002	244104	135486	271333	252327	0.610603	-0.206259	0.798671	-0.0818847	0.997016	-0.00117268	0.00129808	0.214241	0.0976323
10416		Feature_+_446.8444_22.9	446.844	+	446.844	0	22.88	0.38	12	2101376	1965869	2387232	2040988	1798243	1863122	1981781	2233047	2290575	2473368	2376349	2162176	0.094463	-0.206219	0.265014	-0.133065	0.183097	0.179819	0.737319	1.02474	0.576732
1868		Feature_-_161.0446_0.1	161.045	-	161.045	0	0.15	0.26	0	-	-	-	-	-	-	-	-	-	-	-	-	NA	0	NA	0	NA	0
8211		Feature_+_165.0879_21.9	165.088	+	165.088	-0.6	21.72	0.27	12	199370	161168	241117	166837	198493	177968	185501	183437	208776	230210	228153	172538	0.215059	-0.206121	0.554229	-0.148676	0.694878	0.0565754	0.158091	0.667442	0.25631
5599		Feature_+_98.0715_7.4	98.0715	+	98.0715	0	7.35	0.41	1	-	-	-	-	1327352	-	-	-	-	-	-	-	NA	0	NA	0	0.373901	-0.452439
5603		Feature_+_98.0716_1.5	98.0716	+	98.0716	0	1.52	0.44	1	-	-	-	-	1328133	-	-	-	-	-	-	-	NA	0	NA	0	0.373901	-0.171778
2388		Feature_-_138.9404_23.6	138.94	-	138.94	-0.7	23.35	0.22	12	8304396	7985730	9824127	7939774	7519457	7977894	8544852	8581032	8705518	10090284	9893547	8966378	0.0321797	-0.205669	0.207769	-0.169022	0.0399721	0.239064	1.39824	1.49242	0.682419
10525		Feature_+_570.8452_22.9	570.845	+	570.845	0	22.88	0.39	12	1158971	1053598	1144766	1050416	1064556	980338	1065829	869702	1094051	1097901	1177551	1087114	0.0790598	-0.205637	0.418302	-0.0496645	0.726038	0.0194322	0.139041	1.10204	0.378511
10270		Feature_+_356.7760_23.4	356.776	+	356.776	0	23.44	0.19	12	100758	78511	118908	91845	63300	68443	98454	97110	73563	122694	91388	90363	0.403274	-0.205605	0.766653	-0.0737948	0.221848	0.357519	0.653945	0.394399	0.115401
10674		Feature_+_717.0594_10.6	717.059	+	717.059	0	10.59	0.14	12	1276550	1191978	1461410	1391687	1146923	1171271	1199947	1406636	1221762	1406672	1500888	1448087	0.0713506	-0.20532	0.291243	-0.106721	0.00697575	0.256875	2.15641	1.1466	0.535744
10077		Feature_+_322.8572_23.4	322.857	+	322.857	0	23.39	0.07	12	1337796	1373760	1438498	1485682	1168357	1128099	1211463	1645251	1074366	1566976	1545060	1481868	0.279186	-0.205209	0.0751389	-0.0960754	0.0141396	0.359552	1.84956	0.554106	1.12414
618		Feature_-_313.9170_22.7	313.917	-	313.917	0	22.73	0.32	12	123710	126049	133463	122749	89521	83821	130496	109261	104935	117747	109950	145314	0.393231	-0.205105	0.796464	0.0353398	0.278376	0.229439	0.555368	0.405352	0.0988337
525		Feature_-_347.0584_10.7	347.058	-	347.058	0	10.74	0.09	12	178749	190908	246414	183362	107464	183574	132495	181621	148052	168191	201383	203906	0.281039	-0.204496	0.530969	0.114116	0.121079	0.401167	0.91693	0.551233	0.274931
10645		Feature_+_698.7894_22.9	698.789	+	698.789	0	22.89	0.35	12	275494	317933	343019	298214	280144	277677	269835	305544	274278	329350	316742	336319	0.0244942	-0.203686	0.613686	-0.0345462	0.00106488	0.243361	2.9727	1.61094	0.212054
146		Feature_-_674.7911_23.0	674.791	-	674.791	3.6	22.82	0.33	12	193922	121311	149064	176808	140952	132660	118195	136037	91460	171280	126717	147328	0.236275	-0.202928	0.977405	0.00600674	0.854018	0.0628745	0.068533	0.626582	0.00992543
681		Feature_-_295.9062_22.7	295.906	-	295.906	0	22.76	0.38	12	606405	654572	695865	641259	633158	605484	593844	744204	663698	849657	719888	667198	0.2495	-0.202719	0.222811	-0.167402	0.121414	0.232926	0.91573	0.60293	0.652064
10621		Feature_+_667.7910_22.9	667.791	+	667.791	0	22.91	0.4	12	77727	87172	111676	115438	74448	80789	94572	66149	76355	88928	85629	103300	0.285548	-0.20226	0.307431	0.177735	0.0405187	0.281959	1.39234	0.544321	0.512253
3183		Feature_-_100.0005_22.8	100.001	-	100.001	0	22.79	0.24	12	723949	718297	719048	633291	626554	843918	545245	705387	725178	743761	802137	863270	0.322234	-0.201895	0.0651497	-0.218461	0.0794281	0.21495	1.10003	0.491829	1.18609
2376		Feature_-_139.9745_24.4	139.975	-	139.975	-0.7	24.12	0.07	12	1065818	1124796	1482808	1181030	1133117	1075415	1375714	1075875	1234092	1095339	1797608	1163639	0.510953	-0.201823	0.73863	-0.0985883	0.415142	0.240785	0.381804	0.291619	0.131573
226		Feature_-_578.7704_23.3	578.77	-	578.77	0	23.27	0.49	12	69750	64288	137342	81220	58292	64240	77010	101480	78986	120898	82024	76247	0.531916	-0.201786	0.964829	0.0188984	0.189834	0.431313	0.721627	0.274157	0.0155497
1886		Feature_-_159.0667_0.4	159.067	-	159.067	0	0.37	0.14	0	-	-	-	-	-	-	-	-	-	-	-	-	NA	0	NA	0	NA	0
1887		Feature_-_159.0667_2.5	159.067	-	159.067	0	2.54	0.39	0	-	-	-	-	-	-	-	-	-	-	-	-	NA	0	NA	0	NA	0
1888		Feature_-_159.0666_0.7	159.067	-	159.067	0.6	0.43	0.24	0	-	-	-	-	-	-	-	-	-	-	-	-	NA	0	NA	0	NA	0
2407		Feature_-_137.0395_12.1	137.04	-	137.04	-0.7	11.85	0.05	12	2592561	2524124	3135755	2659650	2750410	2493037	2608057	2772411	2907366	3229272	3183285	2642756	0.127056	-0.201758	0.405958	-0.122263	0.268692	0.134311	0.570745	0.896006	0.391519
1760		Feature_-_163.9628_23.1	163.963	-	163.963	-1.2	22.9	0.25	12	203612	238749	215340	218262	187349	264550	213889	234753	154459	288576	260601	270944	0.101393	-0.201546	0.0109965	-0.286622	0.00527733	0.588469	2.27759	0.993992	1.95875
10466		Feature_+_508.8445_22.9	508.844	+	508.844	0	22.85	0.32	12	573538	581914	605541	590038	529712	610560	505051	532200	583440	606537	653886	633894	0.0757343	-0.201127	0.0644655	-0.0918339	0.032162	0.167483	1.49266	1.12071	1.19067
10667	Beta-nicotinamide Ribotide In-Source Fragment	Feature_+_714.0657_10.6	714.066	+	714.066	0	10.55	0.14	12	173039	173641	207994	178732	148162	161341	169964	211469	169262	209160	204081	210729	0.157831	-0.201125	0.123412	-0.155105	0.00510437	0.347332	2.29206	0.801806	0.908642
1053		Feature_-_210.9305_10.4	210.93	-	210.93	1.4	10.13	0.08	12	1050030	905267	996355	1123726	865755	1009799	965997	815485	1128871	938741	1212546	1057330	0.231617	-0.201024	0.579642	-0.0848505	0.648793	0.0756724	0.187894	0.63523	0.23684
10021		Feature_+_298.9215_23.0	298.921	+	298.921	0	22.98	0.4	12	187661	141531	215963	161337	193389	197269	206332	194269	234998	242322	248679	196162	0.153762	-0.200821	0.113093	-0.405388	0.347286	0.15761	0.459312	0.813152	0.946566
4621		Feature_+_74.0970_11.7	74.097	+	74.097	0	11.93	0.24	2	-	1772213	-	-	1315650	-	-	-	-	-	-	-	NA	0	0.373901	0.304747	0.373901	-0.122652
213		Feature_-_596.6693_23.5	596.669	-	596.669	0	23.48	0.13	12	123879	100321	128682	137358	77744	113665	117293	120374	90572	121804	139139	142824	0.0610733	-0.200688	0.389348	-0.140257	0.070682	0.466592	1.15069	1.21415	0.409663
1897		Feature_-_158.9338_14.5	158.934	-	158.934	-1.9	14.77	0.22	0	-	-	-	-	-	-	-	-	-	-	-	-	NA	0	NA	0	NA	0
1898		Feature_-_158.9337_15.3	158.934	-	158.934	-0.6	15.07	0.08	0	-	-	-	-	-	-	-	-	-	-	-	-	NA	0	NA	0	NA	0
1899		Feature_-_158.9336_15.1	158.934	-	158.934	0	15.05	0.31	0	-	-	-	-	-	-	-	-	-	-	-	-	1	0	1	0	1	0
1900		Feature_-_158.9335_14.8	158.934	-	158.934	0	14.79	0.27	0	-	-	-	-	-	-	-	-	-	-	-	-	NA	0	NA	0	NA	0
1901		Feature_-_158.1260_2.9	158.126	-	158.126	0	2.86	0.07	0	-	-	-	-	-	-	-	-	-	-	-	-	NA	0	NA	0	NA	0
1902		Feature_-_157.1225_2.6	157.123	-	157.123	-1.3	2.85	0.03	0	-	-	-	-	-	-	-	-	-	-	-	-	NA	0	NA	0	NA	0
1903		Feature_-_157.1225_8.8	157.123	-	157.123	0	8.83	0.48	0	-	-	-	-	-	-	-	-	-	-	-	-	1	0	1	0	1	0
1904		Feature_-_157.1225_10.8	157.123	-	157.123	0	10.83	0.46	0	-	-	-	-	-	-	-	-	-	-	-	-	NA	0	NA	0	NA	0
1905		Feature_-_157.1225_11.5	157.123	-	157.123	0	11.48	0.48	0	-	-	-	-	-	-	-	-	-	-	-	-	NA	0	NA	0	NA	0
1906		Feature_-_157.1225_11.9	157.123	-	157.123	0	11.71	0.28	0	-	-	-	-	-	-	-	-	-	-	-	-	NA	0	NA	0	NA	0
1907		Feature_-_157.1225_13.0	157.123	-	157.123	-0.6	13.21	0.31	0	-	-	-	-	-	-	-	-	-	-	-	-	NA	0	NA	0	NA	0
1908		Feature_-_157.1225_13.7	157.123	-	157.123	-0.6	13.52	0.26	0	-	-	-	-	-	-	-	-	-	-	-	-	NA	0	NA	0	NA	0
1909		Feature_-_157.1225_14.0	157.123	-	157.123	0	14.02	0.49	0	-	-	-	-	-	-	-	-	-	-	-	-	NA	0	NA	0	NA	0
1910		Feature_-_157.1225_14.3	157.123	-	157.123	0	14.51	0.23	0	-	-	-	-	-	-	-	-	-	-	-	-	NA	0	NA	0	NA	0
1911		Feature_-_157.1225_15.3	157.123	-	157.123	0	15.3	0.39	0	-	-	-	-	-	-	-	-	-	-	-	-	NA	0	NA	0	NA	0
1912		Feature_-_157.1225_16.1	157.123	-	157.123	0	16.12	0.4	0	-	-	-	-	-	-	-	-	-	-	-	-	NA	0	NA	0	NA	0
1913		Feature_-_157.1225_16.4	157.123	-	157.123	0	16.44	0.45	0	-	-	-	-	-	-	-	-	-	-	-	-	NA	0	NA	0	NA	0
1914		Feature_-_157.1225_17.1	157.123	-	157.123	0	17.09	0.47	0	-	-	-	-	-	-	-	-	-	-	-	-	NA	0	NA	0	NA	0
1915		Feature_-_157.1225_17.4	157.123	-	157.123	0	17.64	0.24	0	-	-	-	-	-	-	-	-	-	-	-	-	NA	0	NA	0	NA	0
1916		Feature_-_157.1225_18.0	157.123	-	157.123	0	18.1	0.32	0	-	-	-	-	-	-	-	-	-	-	-	-	NA	0	NA	0	NA	0
1917		Feature_-_157.1225_18.7	157.123	-	157.123	0	18.67	0.44	0	-	-	-	-	-	-	-	-	-	-	-	-	NA	0	NA	0	NA	0
1918		Feature_-_157.1225_20.3	157.123	-	157.123	0	20.29	0.45	0	-	-	-	-	-	-	-	-	-	-	-	-	NA	0	NA	0	NA	0
1919		Feature_-_157.1225_20.6	157.123	-	157.123	0	20.38	0.3	0	-	-	-	-	-	-	-	-	-	-	-	-	NA	0	NA	0	NA	0
1920		Feature_-_157.1225_21.6	157.123	-	157.123	-0.6	21.86	0.23	0	-	-	-	-	-	-	-	-	-	-	-	-	NA	0	NA	0	NA	0
1921		Feature_-_157.1225_22.2	157.123	-	157.123	-0.6	22.2	0.41	0	-	-	-	-	-	-	-	-	-	-	-	-	NA	0	NA	0	NA	0
1922		Feature_-_157.1225_23.5	157.123	-	157.123	-0.6	23.32	0.27	0	-	-	-	-	-	-	-	-	-	-	-	-	NA	0	NA	0	NA	0
1923		Feature_-_157.1225_23.8	157.123	-	157.123	-0.6	23.6	0.31	0	-	-	-	-	-	-	-	-	-	-	-	-	NA	0	NA	0	NA	0
1924		Feature_-_157.1225_24.3	157.123	-	157.123	-0.6	24.55	0.24	0	-	-	-	-	-	-	-	-	-	-	-	-	NA	0	NA	0	NA	0
1925		Feature_-_157.1225_24.9	157.123	-	157.123	-0.6	25.05	0.27	0	-	-	-	-	-	-	-	-	-	-	-	-	NA	0	NA	0	NA	0
1926		Feature_-_157.1225_25.2	157.123	-	157.123	0	25.15	0.46	0	-	-	-	-	-	-	-	-	-	-	-	-	NA	0	NA	0	NA	0
1927		Feature_-_157.1225_25.5	157.123	-	157.123	-0.6	25.64	0.39	0	-	-	-	-	-	-	-	-	-	-	-	-	NA	0	NA	0	NA	0
1928		Feature_-_157.1225_26.6	157.123	-	157.123	-0.6	26.7	0.37	0	-	-	-	-	-	-	-	-	-	-	-	-	NA	0	NA	0	NA	0
1929		Feature_-_157.1225_26.9	157.123	-	157.123	0	26.94	0.49	0	-	-	-	-	-	-	-	-	-	-	-	-	NA	0	NA	0	NA	0
1930		Feature_-_157.1225_28.9	157.123	-	157.123	0	28.94	0.47	0	-	-	-	-	-	-	-	-	-	-	-	-	NA	0	NA	0	NA	0
1931		Feature_-_157.1225_29.3	157.123	-	157.123	0	29.32	0.42	0	-	-	-	-	-	-	-	-	-	-	-	-	NA	0	NA	0	NA	0
1932		Feature_-_157.1225_29.8	157.123	-	157.123	0	29.54	0.25	0	-	-	-	-	-	-	-	-	-	-	-	-	NA	0	NA	0	NA	0
1933		Feature_-_157.1225_30.0	157.123	-	157.123	0	29.95	0.21	0	-	-	-	-	-	-	-	-	-	-	-	-	NA	0	NA	0	NA	0
1934		Feature_-_157.1224_0.9	157.122	-	157.122	0	0.76	0.25	0	-	-	-	-	-	-	-	-	-	-	-	-	NA	0	NA	0	NA	0
1935		Feature_-_157.1224_1.7	157.122	-	157.122	0	1.78	0.33	0	-	-	-	-	-	-	-	-	-	-	-	-	NA	0	NA	0	NA	0
1936		Feature_-_157.1224_2.9	157.122	-	157.122	0	2.88	0.03	0	-	-	-	-	-	-	-	-	-	-	-	-	NA	0	NA	0	NA	0
1937		Feature_-_157.1224_3.2	157.122	-	157.122	0	2.93	0.02	0	-	-	-	-	-	-	-	-	-	-	-	-	NA	0	NA	0	NA	0
1938		Feature_-_157.1224_3.7	157.122	-	157.122	0	3.67	0.47	0	-	-	-	-	-	-	-	-	-	-	-	-	NA	0	NA	0	NA	0
1939		Feature_-_157.1224_4.0	157.122	-	157.122	-0.6	3.74	0.24	0	-	-	-	-	-	-	-	-	-	-	-	-	NA	0	NA	0	NA	0
1940		Feature_-_157.1224_4.2	157.122	-	157.122	0	4.24	0.43	0	-	-	-	-	-	-	-	-	-	-	-	-	NA	0	NA	0	NA	0
1941		Feature_-_157.1224_4.6	157.122	-	157.122	0	4.6	0.46	0	-	-	-	-	-	-	-	-	-	-	-	-	1	0	1	0	1	0
1942		Feature_-_157.1224_4.9	157.122	-	157.122	0	4.87	0.47	0	-	-	-	-	-	-	-	-	-	-	-	-	1	0	1	0	1	0
1943		Feature_-_157.1224_5.9	157.122	-	157.122	0	6.06	0.28	0	-	-	-	-	-	-	-	-	-	-	-	-	NA	0	NA	0	NA	0
1944		Feature_-_157.1224_6.1	157.122	-	157.122	0	6.13	0.44	0	-	-	-	-	-	-	-	-	-	-	-	-	1	0	1	0	1	0
1945		Feature_-_157.1224_6.8	157.122	-	157.122	0	6.72	0.38	0	-	-	-	-	-	-	-	-	-	-	-	-	NA	0	NA	0	NA	0
1946		Feature_-_157.1224_7.1	157.122	-	157.122	0	7.19	0.39	0	-	-	-	-	-	-	-	-	-	-	-	-	NA	0	NA	0	NA	0
1947		Feature_-_157.1224_7.7	157.122	-	157.122	-0.6	7.54	0.32	0	-	-	-	-	-	-	-	-	-	-	-	-	NA	0	NA	0	NA	0
1948		Feature_-_157.1224_8.1	157.122	-	157.122	0	8.08	0.43	0	-	-	-	-	-	-	-	-	-	-	-	-	NA	0	NA	0	NA	0
1949		Feature_-_157.1224_8.4	157.122	-	157.122	0	8.42	0.45	0	-	-	-	-	-	-	-	-	-	-	-	-	1	0	1	0	1	0
1950		Feature_-_157.1224_9.2	157.122	-	157.122	0	9.23	0.44	0	-	-	-	-	-	-	-	-	-	-	-	-	NA	0	NA	0	NA	0
1951		Feature_-_157.1224_9.6	157.122	-	157.122	0.6	9.42	0.33	0	-	-	-	-	-	-	-	-	-	-	-	-	NA	0	NA	0	NA	0
1952		Feature_-_157.1224_9.9	157.122	-	157.122	0	9.91	0.33	0	-	-	-	-	-	-	-	-	-	-	-	-	NA	0	NA	0	NA	0
1953		Feature_-_157.1224_10.2	157.122	-	157.122	0	9.99	0.25	0	-	-	-	-	-	-	-	-	-	-	-	-	NA	0	NA	0	NA	0
1954		Feature_-_157.1224_11.2	157.122	-	157.122	0.6	11.05	0.33	0	-	-	-	-	-	-	-	-	-	-	-	-	NA	0	NA	0	NA	0
1955		Feature_-_157.1224_12.2	157.122	-	157.122	0	12.2	0.44	0	-	-	-	-	-	-	-	-	-	-	-	-	NA	0	NA	0	NA	0
1956		Feature_-_157.1224_12.6	157.122	-	157.122	0.6	12.37	0.25	0	-	-	-	-	-	-	-	-	-	-	-	-	NA	0	NA	0	NA	0
1957		Feature_-_157.1224_13.4	157.122	-	157.122	0	13.38	0.41	0	-	-	-	-	-	-	-	-	-	-	-	-	NA	0	NA	0	NA	0
1958		Feature_-_157.1224_14.9	157.122	-	157.122	0.6	14.7	0.27	0	-	-	-	-	-	-	-	-	-	-	-	-	NA	0	NA	0	NA	0
1959		Feature_-_157.1224_15.6	157.122	-	157.122	0	15.63	0.46	0	-	-	-	-	-	-	-	-	-	-	-	-	NA	0	NA	0	NA	0
1960		Feature_-_157.1224_17.7	157.122	-	157.122	0	17.74	0.45	0	-	-	-	-	-	-	-	-	-	-	-	-	NA	0	NA	0	NA	0
1961		Feature_-_157.1224_18.3	157.122	-	157.122	0	18.27	0.32	0	-	-	-	-	-	-	-	-	-	-	-	-	NA	0	NA	0	NA	0
1962		Feature_-_157.1224_19.0	157.122	-	157.122	0.6	19.17	0.27	0	-	-	-	-	-	-	-	-	-	-	-	-	NA	0	NA	0	NA	0
1963		Feature_-_157.1224_19.2	157.122	-	157.122	0	19.22	0.38	0	-	-	-	-	-	-	-	-	-	-	-	-	NA	0	NA	0	NA	0
1964		Feature_-_157.1224_20.0	157.122	-	157.122	0	20.13	0.26	0	-	-	-	-	-	-	-	-	-	-	-	-	NA	0	NA	0	NA	0
1965		Feature_-_157.1224_20.9	157.122	-	157.122	0.6	21.03	0.29	0	-	-	-	-	-	-	-	-	-	-	-	-	NA	0	NA	0	NA	0
1966		Feature_-_157.1224_21.2	157.122	-	157.122	0	21.18	0.47	0	-	-	-	-	-	-	-	-	-	-	-	-	NA	0	NA	0	NA	0
1967		Feature_-_157.1224_21.9	157.122	-	157.122	0	21.92	0.45	0	-	-	-	-	-	-	-	-	-	-	-	-	NA	0	NA	0	NA	0
1968		Feature_-_157.1224_22.4	157.122	-	157.122	0	22.44	0.43	0	-	-	-	-	-	-	-	-	-	-	-	-	NA	0	NA	0	NA	0
1969		Feature_-_157.1224_22.8	157.122	-	157.122	0	22.75	0.38	0	-	-	-	-	-	-	-	-	-	-	-	-	NA	0	NA	0	NA	0
1970		Feature_-_157.1224_23.2	157.122	-	157.122	0	23.19	0.45	0	-	-	-	-	-	-	-	-	-	-	-	-	NA	0	NA	0	NA	0
1971		Feature_-_157.1224_24.5	157.122	-	157.122	0	24.55	0.48	0	-	-	-	-	-	-	-	-	-	-	-	-	NA	0	NA	0	NA	0
1972		Feature_-_157.1224_25.9	157.122	-	157.122	0	25.87	0.46	0	-	-	-	-	-	-	-	-	-	-	-	-	NA	0	NA	0	NA	0
1973		Feature_-_157.1224_26.2	157.122	-	157.122	0	26.21	0.49	0	-	-	-	-	-	-	-	-	-	-	-	-	NA	0	NA	0	NA	0
1974		Feature_-_157.1224_27.3	157.122	-	157.122	0	27.28	0.43	0	-	-	-	-	-	-	-	-	-	-	-	-	NA	0	NA	0	NA	0
1975		Feature_-_157.1224_27.7	157.122	-	157.122	0	27.69	0.43	0	-	-	-	-	-	-	-	-	-	-	-	-	NA	0	NA	0	NA	0
1976		Feature_-_157.1224_28.2	157.122	-	157.122	0	28.19	0.44	0	-	-	-	-	-	-	-	-	-	-	-	-	NA	0	NA	0	NA	0
1977		Feature_-_157.1224_28.5	157.122	-	157.122	0	28.45	0.48	0	-	-	-	-	-	-	-	-	-	-	-	-	NA	0	NA	0	NA	0
1978		Feature_-_157.1223_0.1	157.122	-	157.122	0	0.12	0.05	0	-	-	-	-	-	-	-	-	-	-	-	-	NA	0	NA	0	NA	0
1979		Feature_-_157.1223_0.4	157.122	-	157.122	0	0.15	0.05	0	-	-	-	-	-	-	-	-	-	-	-	-	NA	0	NA	0	NA	0
1980		Feature_-_157.1223_0.7	157.122	-	157.122	0	0.43	0.07	0	-	-	-	-	-	-	-	-	-	-	-	-	NA	0	NA	0	NA	0
1981		Feature_-_157.1223_1.3	157.122	-	157.122	0.6	1.09	0.24	0	-	-	-	-	-	-	-	-	-	-	-	-	NA	0	NA	0	NA	0
1982		Feature_-_157.1223_1.9	157.122	-	157.122	0	1.93	0.43	0	-	-	-	-	-	-	-	-	-	-	-	-	NA	0	NA	0	NA	0
1983		Feature_-_157.1223_2.3	157.122	-	157.122	0	2.04	0.25	0	-	-	-	-	-	-	-	-	-	-	-	-	NA	0	NA	0	NA	0
1984		Feature_-_157.1223_5.3	157.122	-	157.122	0.6	5.37	0.38	0	-	-	-	-	-	-	-	-	-	-	-	-	NA	0	NA	0	NA	0
1985		Feature_-_157.1223_5.6	157.122	-	157.122	0	5.61	0.49	0	-	-	-	-	-	-	-	-	-	-	-	-	NA	0	NA	0	NA	0
1986		Feature_-_157.1223_6.5	157.122	-	157.122	0	6.54	0.47	0	-	-	-	-	-	-	-	-	-	-	-	-	NA	0	NA	0	NA	0
1987		Feature_-_157.1223_10.5	157.122	-	157.122	0	10.5	0.48	0	-	-	-	-	-	-	-	-	-	-	-	-	1	0	1	0	1	0
1988		Feature_-_157.1223_14.5	157.122	-	157.122	0	14.52	0.46	0	-	-	-	-	-	-	-	-	-	-	-	-	NA	0	NA	0	NA	0
1989		Feature_-_157.1223_16.8	157.122	-	157.122	0	16.8	0.47	0	-	-	-	-	-	-	-	-	-	-	-	-	NA	0	NA	0	NA	0
1990		Feature_-_157.1223_19.6	157.122	-	157.122	0	19.63	0.46	0	-	-	-	-	-	-	-	-	-	-	-	-	NA	0	NA	0	NA	0
1991		Feature_-_157.1223_24.0	157.122	-	157.122	0	24.05	0.48	0	-	-	-	-	-	-	-	-	-	-	-	-	NA	0	NA	0	NA	0
1992		Feature_-_157.1222_7.4	157.122	-	157.122	0	7.37	0.43	0	-	-	-	-	-	-	-	-	-	-	-	-	1	0	1	0	1	0
1993		Feature_-_157.0862_0.1	157.086	-	157.086	0	0.05	0.12	0	-	-	-	-	-	-	-	-	-	-	-	-	1	0	1	0	1	0
1994		Feature_-_157.0512_0.3	157.051	-	157.051	0	0.29	0.18	0	-	-	-	-	-	-	-	-	-	-	-	-	NA	0	NA	0	NA	0
10267		Feature_+_354.7796_23.7	354.78	+	354.78	-4.5	23.46	0.1	12	191621	193507	295847	187701	158674	178682	254157	222087	186630	241424	256795	254071	0.220558	-0.199957	0.518214	-0.152016	0.00313851	0.486568	2.50328	0.656478	0.285491
10452		Feature_+_487.8669_22.9	487.867	+	487.867	0	22.94	0.45	12	112826	94846	109716	113156	122894	96062	94712	110934	111672	104889	106854	134749	0.244621	-0.199669	0.438555	-0.125075	0.978117	-0.00374249	0.00960924	0.611506	0.357976
1997		Feature_-_156.9424_8.0	156.942	-	156.942	-1.3	8.17	0.16	0	-	-	-	-	-	-	-	-	-	-	-	-	NA	0	NA	0	NA	0
1998		Feature_-_156.9423_7.8	156.942	-	156.942	0.6	7.9	0.25	0	-	-	-	-	-	-	-	-	-	-	-	-	NA	0	NA	0	NA	0
[truncated: 8,817 more rows]

## Sheet: cross comparison- Figure 3
Manual Annotation	Metabolite	Formula	Polarity (z)	mz	ppm	RT	RT_range	Detection	infected BafA/infected DMSO ttest pvalue	infected BafA/infected DMSO Log2 fold change	infected DMSO/uninfected DMSO, ttest pvalue	infected DMSO/uninfected DMSO, log2 fold change
Glutamate negative mode	Feature_-_146.0447_11.5	146.045	-	146.045	0	11.53	0.16	11	0.0018288	-4.91843	0.00175727	5.51976
Glutamate positive mode	Feature_+_148.0602_11.8	148.06	+	148.06	-0.7	11.54	0.05	12	0.0016426	-4.04303	0.00153528	4.67803
Glutamate positive mode	Feature_+_148.0601_11.5	148.06	+	148.06	0	11.52	0.11	12	0.00166119	-3.95221	0.00153528	4.67803
Isotope of Glutamate positive mode	Feature_+_149.0635_11.5	149.064	+	149.064	0	11.52	0.21	8	0.00346659	-4.00015	0.00347172	3.99207
Isotope of In-source fragment of GABA, "2-Pyrolidinone"	Feature_+_87.0445_11.4	87.0445	+	87.0445	0	11.36	0.26	6	0.000779613	-3.73096	0.000779613	3.73096
Glutamate as sodium adduct [M+Na]+	Feature_+_170.0421_11.5	170.042	+	170.042	0	11.54	0.25	6	0.00792256	-3.63405	0.00792256	3.63405
In-source fragment of Glutamate	Feature_+_130.0497_11.5	130.05	+	130.05	0	11.54	0.3	6	0.00858742	-3.59724	0.00858742	3.59724
CO2 Adduct of Glutamate	Feature_+_192.0240_11.6	192.024	+	192.024	0	11.58	0.36	6	0.0011883	-3.4733	0.0011883	3.4733
Glutamate as negative mode sodium adduct [M+Na-2H]-	Feature_-_168.0269_11.5	168.027	-	168.027	0	11.53	0.26	6	0.00226512	-2.79382	0.00226512	2.79382
In-source fragment of GABA, "2-Pyrolidinone"	Feature_+_86.0604_11.3	86.0604	+	86.0604	0	11.32	0.28	6	0.000745787	-2.75564	0.000745787	2.75564
In-source fragment of Glutamate	Feature_+_84.0448_11.6	84.0448	+	84.0448	0	11.57	0.44	6	0.00672686	-2.5896	0.00672686	2.5896
M+1 Isotope of GABA	Feature_+_105.0741_11.3	105.074	+	105.074	0	11.34	0.31	6	0.00301394	-2.09457	0.00301394	2.09457
potassium	Feature_-_356.3734_23.2	356.373	-	356.373	0	23.18	0.38	11	0.0369384	-0.864751	0.0150867	1.58695
GABA	Feature_+_104.0708_11.3	104.071	+	104.071	0	11.35	0.29	6	0.00163775	-1.3664	0.00163775	1.3664
GABA, peak tail	Feature_+_104.0708_11.6	104.071	+	104.071	0	11.37	0.08	6	0.00628393	-1.29568	0.00628393	1.29568
potassium	Feature_-_724.7686_22.9	724.769	-	724.769	0	22.86	0.45	12	0.0163787	-0.982784	0.00249537	1.07254
potassium	Feature_+_440.8363_23.2	440.836	+	440.836	0	23.2	0.48	12	0.00317986	-0.775712	0.00271124	0.997022
potassium	Feature_+_544.7504_23.4	544.75	+	544.75	0	23.4	0.09	12	0.0133011	-0.573749	0.00241787	0.985273
potassium	Feature_+_350.8474_23.3	350.847	+	350.847	0	23.26	0.2	12	0.00939532	-0.61294	0.0146769	0.945062
potassium	Feature_-_461.8357_23.2	461.836	-	461.836	0	23.21	0.39	11	0.00191154	-1.09594	0.0136038	0.942224
	Feature_+_306.8572_23.3	306.857	+	306.857	0	23.28	0.09	12	0.00677848	-0.504689	0.00452334	0.931578
potassium	Feature_+_512.8016_23.3	512.802	+	512.802	0	23.28	0.25	12	0.00301694	-0.78135	0.00158894	0.905013
potassium	Feature_-_375.8682_23.1	375.868	-	375.868	0	23.15	0.3	12	0.00715473	-0.66529	0.0194477	0.899298
potassium	Feature_-_527.3290_22.9	527.329	-	527.329	0	22.86	0.41	12	0.0355565	-0.682401	0.00766262	0.898144
potassium	Feature_-_456.8338_23.2	456.834	-	456.834	0	23.19	0.41	12	0.033137	-0.590497	0.00696828	0.870915
potassium	Feature_+_751.7706_22.9	751.771	+	751.771	0	22.88	0.37	12	0.00599431	-1.5912	0.0323559	0.869393
potassium	Feature_+_412.8473_23.3	412.847	+	412.847	0	23.28	0.38	12	0.0039496	-0.63789	0.00233668	0.868323
potassium	Feature_+_816.7866_23.2	816.787	+	816.787	0	23.19	0.32	12	0.0356123	-0.622585	0.00827057	0.868014
	Feature_-_450.7881_23.3	450.788	-	450.788	0	23.33	0.13	12	0.00691559	-0.472502	0.00582787	0.864772
	Feature_+_664.7960_23.3	664.796	+	664.796	0	23.28	0.37	12	0.00968722	-0.518819	0.023617	0.864763
potassium	Feature_+_574.8017_23.3	574.802	+	574.802	0	23.28	0.16	12	0.0288942	-0.593854	0.00810785	0.864736
	Feature_+_390.8641_23.3	390.864	+	390.864	0	23.28	0.38	12	0.0413542	-0.400261	0.00367218	0.829002
	Feature_+_917.7603_22.9	917.76	+	917.76	0	22.92	0.44	12	0.0237569	-0.420516	0.0491613	0.814952
potassium	Feature_-_383.8553_23.2	383.855	-	383.855	0	23.24	0.4	12	0.039329	-0.688074	0.00328071	0.812602
potassium	Feature_-_644.7437_23.2	644.744	-	644.744	0	23.22	0.32	12	0.00400892	-0.893786	0.00327998	0.810997
potassium	Feature_+_542.8560_23.2	542.856	+	542.856	0	23.22	0.39	12	0.000597126	-0.655685	0.00219342	0.807865
potassium	Feature_-_570.7252_23.3	570.725	-	570.725	0	23.29	0.08	12	0.0225721	-0.897467	0.038135	0.805224
potassium	Feature_+_228.9094_23.3	228.909	+	228.909	0	23.26	0.26	12	0.000359423	-0.560251	0.00165219	0.803737
potassium	Feature_-_472.8077_23.3	472.808	-	472.808	0	23.26	0.26	12	0.0496429	-0.683178	0.0337779	0.799336
	Feature_+_496.8277_23.3	496.828	+	496.828	0	23.28	0.44	12	0.0297078	-0.524336	0.0152447	0.798897
potassium	Feature_+_474.8462_23.3	474.846	+	474.846	0	23.26	0.35	12	0.0040938	-0.762641	0.0146789	0.796819
	Feature_+_290.8834_23.3	290.883	+	290.883	0	23.26	0.49	12	0.00961405	-0.573648	0.00413137	0.789251
potassium	Feature_-_355.8719_23.2	355.872	-	355.872	0	23.18	0.3	12	0.0461839	-0.588978	0.00150408	0.779512
potassium	Feature_+_356.8545_23.2	356.854	+	356.854	0	23.23	0.43	12	0.00494487	-0.623883	0.00121992	0.779122
	Feature_-_410.8336_23.3	410.834	-	410.834	0	23.26	0.48	12	0.0140035	-0.567377	0.0463617	0.770986
	Feature_-_432.8147_23.3	432.815	-	432.815	0	23.26	0.29	12	0.0153889	-0.554754	0.01401	0.767112
potassium	Feature_+_388.8020_23.3	388.802	+	388.802	0	23.31	0.08	12	0.00154683	-0.745638	0.0125765	0.765078
potassium	Feature_-_472.8315_23.3	472.832	-	472.832	0	23.26	0.33	12	0.0503998	-0.597591	0.0322767	0.759883
	Feature_+_328.8650_23.3	328.865	+	328.865	0	23.28	0.26	12	0.00888869	-0.579349	0.0047423	0.756647
potassium	Feature_-_532.7712_23.3	532.771	-	532.771	0	23.3	0.29	12	0.0163652	-0.85295	0.00995146	0.751754
potassium	Feature_+_478.7922_23.2	478.792	+	478.792	0	23.24	0.08	12	0.0357818	-0.644437	0.0245041	0.751192
potassium	Feature_-_769.7682_22.9	769.768	-	769.768	0	22.86	0.31	12	0.0234214	-0.865394	0.0318493	0.751142
potassium	Feature_+_728.3189_22.9	728.319	+	728.319	0	22.94	0.41	12	0.0186603	-0.785344	0.0101339	0.750741
potassium	Feature_+_558.8290_23.3	558.829	+	558.829	0	23.28	0.34	12	0.00920399	-0.697453	0.0173992	0.748908
	Feature_+_268.9019_23.3	268.902	+	268.902	0	23.26	0.4	12	0.0174992	-0.517299	0.00624247	0.729748
	Feature_-_538.7783_23.3	538.778	-	538.778	0	23.27	0.27	12	0.00463746	-0.578691	0.00613405	0.71985
	Feature_+_360.8125_23.4	360.812	+	360.812	0	23.4	0.07	12	0.0342213	-0.44539	0.00186039	0.717492
	Feature_+_592.7783_23.3	592.778	+	592.778	0	23.34	0.36	12	0.0420214	-0.519057	0.0171109	0.713897
	Feature_+_508.7961_23.4	508.796	+	508.796	0	23.44	0.33	12	0.0498299	-0.482913	0.0204854	0.713635
potassium	Feature_-_488.7801_23.3	488.78	-	488.78	0	23.3	0.09	12	0.000534809	-0.818726	0.0415465	0.706354
potassium	Feature_+_312.8911_23.3	312.891	+	312.891	0	23.26	0.39	12	0.00241602	-0.468535	0.00498952	0.701211
	Feature_+_396.8730_23.3	396.873	+	396.873	0	23.26	0.28	12	0.00953149	-0.545222	0.00498492	0.698721
potassium	Feature_-_448.7880_23.3	448.788	-	448.788	0	23.33	0.27	12	0.00850621	-0.655799	0.0308456	0.685469
	Feature_-_464.7625_23.4	464.762	-	464.762	0	23.36	0.09	12	0.00332473	-0.552464	0.00171331	0.68443
potassium	Feature_+_282.8387_23.4	282.839	+	282.839	0	23.37	0.11	12	0.0282833	-0.611656	0.00618542	0.68097
potassium	Feature_+_372.8279_23.3	372.828	+	372.828	0	23.28	0.22	12	0.00807512	-0.686279	0.0240688	0.680767
	Feature_+_366.8201_23.3	366.82	+	366.82	0	23.31	0.07	12	0.0188926	-0.507445	0.0070624	0.658212
	Feature_+_334.8732_23.3	334.873	+	334.873	0	23.26	0.42	12	0.00653147	-0.554612	0.0111096	0.658188
	Feature_-_504.7808_23.3	504.781	-	504.781	0	23.35	0.11	12	0.0315169	-0.540544	0.0169096	0.657922
	Feature_+_224.9120_23.3	224.912	+	224.912	0	23.28	0.36	12	0.013511	-0.527114	0.00526065	0.657883
potassium	Feature_+_710.8188_23.2	710.819	+	710.819	0	23.18	0.39	12	0.0264558	-0.654285	0.0167466	0.654919
	Feature_+_266.8650_23.3	266.865	+	266.865	0	23.31	0.27	12	0.0115527	-0.418662	0.000815914	0.649285
	Feature_-_500.8226_23.2	500.823	-	500.823	0	23.18	0.32	12	0.0429213	-0.557945	0.00434197	0.647252
potassium	Feature_-_406.8216_23.4	406.822	-	406.822	0	23.36	0.24	12	0.0322126	-0.627097	0.00841575	0.630868
potassium	Feature_-_586.6993_23.3	586.699	-	586.699	0	23.31	0.08	12	0.0207598	-0.798476	0.0303517	0.622854
	Feature_-_288.8949_23.3	288.895	-	288.895	0	23.26	0.23	12	0.0303656	-0.366072	0.00780847	0.613663
	Feature_+_446.7914_23.4	446.791	+	446.791	0	23.37	0.14	12	0.00707553	-0.520927	0.00287952	0.603024
	Feature_+_290.9091_23.2	290.909	+	290.909	0	23.23	0.47	12	0.010267	-0.526544	0.034628	0.597659
	Feature_+_398.7678_23.4	398.768	+	398.768	0	23.4	0.14	12	0.0145581	-0.514304	0.0153585	0.593576
potassium	Feature_+_502.8363_23.2	502.836	+	502.836	0	23.23	0.43	12	0.0108276	-0.629722	0.00897748	0.593053
potassium	Feature_-_705.7961_22.9	705.796	-	705.796	0	22.86	0.36	12	0.0175543	-1.10749	0.0288012	0.59247
	Feature_+_382.7939_23.4	382.794	+	382.794	0	23.37	0.05	12	0.0394869	-0.427739	0.0121247	0.590846
potassium	Feature_-_326.8512_23.3	326.851	-	326.851	0	23.3	0.22	12	0.00286032	-0.646455	0.0424395	0.590658
	Feature_-_178.9332_23.3	178.933	-	178.933	0	23.3	0.4	12	0.00405852	-0.400244	0.0257803	0.585067

## Sheet: Sheet2
			infected DMSO/uninfected DMSO, ttest pvalue	infected DMSO/uninfected DMSO, log2 fold change
117		Feature_-_719.0892_22.8	0.000232992	1.01972
1044	In-source fragment of AMP	Feature_-_215.0319_10.8	0.000329151	1.67954
5001	In-source fragment of GABA, "2-Pyrolidinone"	Feature_+_86.0604_11.3	0.000745787	2.75564
5003	Isotope of In-source fragment of GABA, "2-Pyrolidinone"	Feature_+_87.0445_11.4	0.000779613	3.73096
8831	CO2 Adduct of Glutamate	Feature_+_192.0240_11.6	0.0011883	3.4733
7616	Glutamate positive mode	Feature_+_148.0602_11.8	0.00153528	4.67803
7615	Glutamate positive mode	Feature_+_148.0601_11.5	0.00153528	4.67803
10245		Feature_+_348.0697_11.0	0.00154866	1.26309
5798	GABA	Feature_+_104.0708_11.3	0.00163775	1.3664
2119	Glutamate negative mode	Feature_-_146.0447_11.5	0.00175727	5.51976
1537	Glutamate negative mode	Feature_-_168.0269_11.5	0.00226512	2.79382
112	K	Feature_-_724.7686_22.9	0.00249537	1.07254
10405	K	Feature_+_440.8363_23.2	0.00271124	0.997022
5867	GABA	Feature_+_105.0741_11.3	0.00301394	2.09457
1995		Feature_-_156.9625_7.1	0.00341374	1.37669
7639	Isotope of Glutamate positive mode	Feature_+_149.0635_11.5	0.00347172	3.99207
5799	GABA, peak tail	Feature_+_104.0708_11.6	0.00628393	1.29568
4986	glutamate	Feature_+_84.0448_11.6	0.00672686	2.5896
10378		Feature_+_412.8201_23.3	0.00674174	1.02345
8420	glutamate	Feature_+_170.0421_11.5	0.00792256	3.63405
6680	glutamate	Feature_+_130.0497_11.5	0.00858742	3.59724
158		Feature_-_661.4448_22.9	0.0112393	1.39912
506	K	Feature_-_356.3734_23.2	0.0150867	1.58695
235		Feature_-_567.7981_23.2	0.0252367	1.12377
10549		Feature_+_596.7844_23.3	0.0266832	0.992267
67		Feature_-_792.2390_22.9	0.032315	1.1273
