# Supplementary material for: Rapid purification and metabolomic profiling of synaptic vesicles from mammalian brain
Source: eLife. 2020 Oct 12;9:e59699. doi: 10.7554/eLife.59699 (PMC7575323; doi:10.7554/eLife.59699)
Supplement: Supplementary file 5. [file elife-59699-supp5.xlsx]

## Sheet: Fig 4D
	Metabolite	SV-Tag infected, sample 1	SV-Tag infected, sample 2	SV-Tag infected, sample 3	SV-Tag infected, sample 4	uninfected sample 1	uninfected sample 2	uninfected sample 3	uninfected sample 4	infected average	uninfected average	fold change	Log2FoldChange	ttest pvalue	stdev infected	stdev uninfected	stdev ratio	SEM log2 fold change	count infected	count uninfected	minimum
131	1-Methylnicotinamide	25194.6	25194.6	25194.6	25194.6	25194.6	25194.6	25194.6	25194.6	25194.6	25194.6	1	0	#DIV/0!	0	0	0	0	4	4	4
74	2,3-Diphosphoglyceric acid	10000	10000	10000	10000	10000	10000	10000	10000	10000	10000	1	0	#DIV/0!	0	0	0	0	4	4	4
88	3-Hydroxybutyric acid	117423	117423	117423	117423	117423	117423	117423	117423	117423	117423	1	0	#DIV/0!	0	0	0	0	4	4	4
72	3-Phosphoglyceric acid	10000	10000	10000	10000	10000	10000	10000	10000	10000	10000	1	0	#DIV/0!	0	0	0	0	4	4	4
6	4-Hydroxyproline	61846.9	61846.9	61846.9	61846.9	61846.9	61846.9	61846.9	61846.9	61846.9	61846.9	1	0	#DIV/0!	0	0	0	0	4	4	4
104	4,5-Dihydroorotic acid	11873.3	11873.3	11873.3	11873.3	11873.3	11873.3	11873.3	11873.3	11873.3	11873.3	1	0	#DIV/0!	0	0	0	0	4	4	4
94	5-Phosphoribosylamine	10000	10000	10000	10000	10000	10000	10000	10000	10000	10000	1	0	#DIV/0!	0	0	0	0	4	4	4
42	5'-Methylthioadenosine	10000	10000	10000	10000	10000	10000	10000	10000	10000	10000	1	0	#DIV/0!	0	0	0	0	4	4	4
115	6-Phosphogluconic acid	10459.9	10459.9	10459.9	10459.9	10459.9	10459.9	10459.9	10459.9	10459.9	10459.9	1	0	#DIV/0!	0	0	0	0	4	4	4
81	Acetoacetic acid	43141	43141	43141	43141	43141	43141	43141	43141	43141	43141	1	0	#DIV/0!	0	0	0	0	4	4	4
60	Acetyl-CoA	10000	10000	10000	10000	10000	10000	10000	10000	10000	10000	1	0	#DIV/0!	0	0	0	0	4	4	4
										#DIV/0!	#DIV/0!	#DIV/0!		#DIV/0!	#DIV/0!	#DIV/0!	#DIV/0!	#DIV/0!
109	Acetylcysteine	10000	10000	10000	10000	10000	10000	10000	10000	10000	10000	1	0	#DIV/0!	0	0	0	0	4	4	4
102	Adenine	23126752	20996116	32827322	34211836	18283658	20104790	26791398	27244302	2.77905e+07	23106037	1.20274	0.266322	0.292109	6.6962e+06	4.58148e+06	0.375311	0.225095	4	4	4
27	Adenosine	19880252	20504496	33041118	33405498	18136496	20166434	26544662	26047792	26707841	22723846	1.17532	0.233056	0.391342	7.5292e+06	4.21234e+06	0.396548	0.243379	4	4	4
49	Adenosine diphosphate ribose	10000	10000	10000	10000	10000	10000	10000	10000	10000	10000	1	0	#DIV/0!	0	0	0	#DIV/0!
30	Adenosine monophosphate	81373	409510	2216440	2363430	89472	81373	99030	3406420	1.26769e+06	919074	1.37931	0.463947	0.74426	1.18948e+06	1.65825e+06	2.80505	1.46697	4	4	4
35	Adenosine triphosphate	13421.3	13421.3	13421.3	13421.3	13421.3	13421.3	13421.3	13421.3	13421.3	13421.3	1	0	#DIV/0!	0	0	0	0	4	4	4
46	Adenylsuccinic acid	10000	10000	10000	10000	10000	10000	10000	10000	10000	10000	1	0	#DIV/0!	0	0	0	0	4	4	4
32	ADP	10000	10000	10000	10000	10000	10000	10000	10000	10000	10000	1	0	#DIV/0!	0	0	0	0	4	4	4
										#DIV/0!	#DIV/0!	#DIV/0!		#DIV/0!	#DIV/0!	#DIV/0!	#DIV/0!	#DIV/0!
80	Allantoin	14856.1	14856.1	14856.1	14856.1	14856.1	14856.1	14856.1	14856.1	14856.1	14856.1	1	0	#DIV/0!	0	0	0	0	4	4	4
111	Aminoadipic acid	25713.6	25713.6	25713.6	25713.6	25713.6	25713.6	25713.6	25713.6	25713.6	25713.6	1	0	#DIV/0!	0	0	0	0	4	4	4
38	Argininosuccinic acid	10000	10000	10000	10000	10000	10000	10000	10000	10000	10000	1	0	#DIV/0!	0	0	0	0	4	4	4
0	Beta-Alanine	95665.9	95665.9	95665.9	95665.9	95665.9	95665.9	95665.9	95665.9	95665.9	95665.9	1	0	#DIV/0!	0	0	0	0	4	4	4
3	Betaine	1557120	1.19672e+06	1.19672e+06	1.19672e+06	1.19672e+06	1.19672e+06	1.19672e+06	1.19672e+06	1.28682e+06	1.19672e+06	1.07529	0.104726	0.355918	180202	0	0.15058	0.101015	4	4	4
44	Butyrylcarnitine	76567.9	76567.9	76567.9	76567.9	76567.9	76567.9	76567.9	76567.9	76567.9	76567.9	1	0	#DIV/0!	0	0	0	0	4	4	4
146	Carbamoyl phosphate	9513053	9105062	10192296	10229030	9638264	8528675	8990681	10328799	9.75986e+06	9.3716e+06	1.04143	0.0585644	0.447506	546747	783786	0.104833	0.0726125	4	4	4
140	Carnosine	10000	10000	10000	10000	10000	10000	10000	10000	10000	10000	1	0	#DIV/0!	0	0	0	0	4	4	4
142	CDP	10000	10000	10000	10000	10000	10000	10000	10000	10000	10000	1	0	#DIV/0!	0	0	0	0	4	4	4
96	Choline	654276	539069	671390	744653	937569	286449	584038	773824	652347	645470	1.01065	0.0152895	0.963988	85085.6	279563	0.457148	0.326286	4	4	4
120	cis-Aconitic acid	14418.6	14418.6	14418.6	14418.6	14418.6	14418.6	14418.6	14418.6	14418.6	14418.6	1	0	#DIV/0!	0	0	0	0	4	4	4
122	Citric acid	29186.7	29186.7	29186.7	29186.7	29186.7	29186.7	29186.7	29186.7	29186.7	29186.7	1	0	#DIV/0!	0	0	0	0	4	4	4
114	Citrulline	150989	85877.3	85877.3	106572	1002075	154516	1944952	112427	107329	803492	0.133578	-2.90425	0.158547	30698.1	864312	0.148682	0.80291	4	4	4
17	Creatine	4888989	3285465	6379420	4318036	2824729	1508425	2252496	10695648	4.71798e+06	4.32032e+06	1.09204	0.127029	0.864777	1.29121e+06	4.28424e+06	1.12341	0.742066	4	4	4
84	Creatinine	381713	149439	195997	790986	546445	209482	744468	149439	379534	412459	0.920174	-0.120021	0.876477	292077	281994	0.947229	0.742556	4	4	4
23	Cyclic AMP	10000	10000	13790	11542	10000	10000	10786	10000	11333	10196.5	1.11146	0.152456	0.261634	1792.05	393	0.180897	0.117404	4	4	4
137	Cytidine	13480.9	13480.9	13480.9	13480.9	13480.9	13480.9	13480.9	13480.9	13480.9	13480.9	1	0	#DIV/0!	0	0	0	0	4	4	4
139	Cytidine monophosphate	10000	10000	10000	10000	10000	10000	10000	10000	10000	10000	1	0	#DIV/0!	0	0	0	0	4	4	4
143	Cytidine triphosphate	10000	10000	10000	10000	10000	10000	10000	10000	10000	10000	1	0	#DIV/0!	0	0	0	0	4	4	4
79	Cytosine	61069.4	61069.4	61069.4	61069.4	61069.4	61069.4	61069.4	61069.4	61069.4	61069.4	1	0	#DIV/0!	0	0	0	0	4	4	4
107	D-2-Hydroxyglutaric acid	64549.9	64549.9	88071	83967	64549.9	64549.9	64549.9	86738	75284.4	70096.9	1.07401	0.103001	0.557713	12507.9	11094.1	0.246441	0.165521	4	4	4
113	D-Glucose	23348.3	23348.3	23348.3	23348.3	24204	23348.3	23348.3	23348.3	23348.3	23562.2	0.990921	-0.0131585	0.355918	0	427.857	0.0179937	0.0130987	4	4	4
10	D-Glyceraldehyde 3-phosphate	10368.6	10368.6	10368.6	10368.6	10368.6	10368.6	10368.6	10368.6	10368.6	10368.6	1	0	#DIV/0!	0	0	0	0	4	4	4
12	D-Ribose 5-phosphate	10000	10000	10000	10000	10000	10000	10000	10000	10000	10000	1	0	#DIV/0!	0	0	0	0	4	4	4
130	D-Sedoheptulose 7-phosphate	10000	10000	10000	10000	10000	10000	10000	10000	10000	10000	1	0	#DIV/0!	0	0	0	0	4	4	4
54	Dihydrofolic acid	15246.6	15246.6	15246.6	15246.6	15246.6	15246.6	15246.6	15246.6	15246.6	15246.6	1	0	#DIV/0!	0	0	0	0	4	4	4
9	Dihydroxyacetone phosphate	10000	10000	10000	10000	10000	10000	10000	10000	10000	10000	1	0	#DIV/0!	0	0	0	0	4	4	4
34	dTDP	10000	10000	10000	10000	10000	10000	10000	10000	10000	10000	1	0	#DIV/0!	0	0	0	0	4	4	4
										#DIV/0!	#DIV/0!	#DIV/0!		#DIV/0!	#DIV/0!	#DIV/0!	#DIV/0!	#DIV/0!
61	FAD	10000	11516	10000	10000	10000	10000	10000	10000	10379	10000	1.0379	0.0536674	0.355918	758	0	0.0758	0.0526815	4	4	4
53	Folic acid	10000	10000	10000	10000	10000	10000	10000	10000	10000	10000	1	0	#DIV/0!	0	0	0	0	4	4	4
116	Fructose 1,6-bisphosphate	10000	10000	10000	10000	10000	10000	10000	10000	10000	10000	1	0	#DIV/0!	0	0	0	0	4	4	4
13	Fructose 6-phosphate	10000	10000	10000	10000	10000	10000	10000	10000	10000	10000	1	0	#DIV/0!	0	0	0	0	4	4	4
78	Fumaric acid	32452.4	32452.4	32452.4	32452.4	32452.4	32452.4	32452.4	32452.4	32452.4	32452.4	1	0	#DIV/0!	0	0	0	0	4	4	4
147	GABA	4347146	4947084	8147632	7893019	3.2722e+06	3.2722e+06	3.2722e+06	3.2722e+06	6.33372e+06	3.2722e+06	1.93561	0.952791	0.0207145	1.96561e+06	0	0.600701	0.223864	4	4	4
148	GABA-13C-4	1295852	1342134	1591225	1395384	1625204	947112	1519539	1350842	1.40615e+06	1.36067e+06	1.03342	0.0474275	0.789028	129913	297962	0.245616	0.171445	4	4	4
14	Glucose 6-phosphate	10000	10000	10000	10000	10000	10000	10000	10000	10000	10000	1	0	#DIV/0!	0	0	0	0	4	4	4
37	Glutathione	10000	10000	10000	10000	10000	10000	10000	10000	10000	10000	1	0	#DIV/0!	0	0	0	0	4	4	4
75	Glycerol 3-phosphate	10000	10000	10000	10000	10000	10000	10000	10000	10000	10000	1	0	#DIV/0!	0	0	0	0	4	4	4
62	Glycine	549870	131453	153834	382645	431988	261991	310792	136067	304450	285210	1.06746	0.0941855	0.874651	199130	122449	0.835165	0.56437	4	4	4
69	Guanidoacetic acid	17980.4	17980.4	17980.4	17980.4	17980.4	17980.4	17980.4	17980.4	17980.4	17980.4	1	0	#DIV/0!	0	0	0	0	4	4	4
103	Guanine	24130.9	24130.9	24130.9	24130.9	24130.9	24130.9	24130.9	24130.9	24130.9	24130.9	1	0	#DIV/0!	0	0	0	0	4	4	4
28	Guanosine	10835.7	10835.7	10835.7	10835.7	10835.7	10835.7	10835.7	10835.7	10835.7	10835.7	1	0	#DIV/0!	0	0	0	0	4	4	4
33	Guanosine diphosphate	10000	10000	10000	10000	10000	10000	10000	10000	10000	10000	1	0	#DIV/0!	0	0	0	0	4	4	4
31	Guanosine monophosphate	10000	10000	10000	10000	10000	10000	10000	10000	10000	10000	1	0	#DIV/0!	0	0	0	0	4	4	4
36	Guanosine triphosphate	10000	10000	10000	10000	10000	10000	10000	10000	10000	10000	1	0	#DIV/0!	0	0	0	0	4	4	4
89	Homocysteine	10000	10000	10000	10000	10000	10000	10000	10000	10000	10000	1	0	#DIV/0!	0	0	0	0	4	4	4
63	Hypotaurine	10000	10000	10000	10000	10000	10000	10000	10000	10000	10000	1	0	#DIV/0!	0	0	0	0	4	4	4
99	Hypoxanthine	696777	577292	1104409	1129913	599116	538862	922029	1019818	877098	769956	1.13915	0.187961	0.581513	281653	236747	0.506459	0.320706	4	4	4
21	Inosine	32984	46369	68296	56697	24193	31699	44468	59042	51086.5	39850.5	1.28195	0.358344	0.334921	15028.9	15288.8	0.619774	0.348743	4	4	4
25	Inosinic acid	10000	10000	10000	10000	10000	10000	10000	10000	10000	10000	1	0	#DIV/0!	0	0	0	0	4	4	4
144	L-Acetylcarnitine	50632.9	50632.9	50632.9	50632.9	50632.9	50632.9	50632.9	50632.9	50632.9	50632.9	1	0	#DIV/0!	0	0	0	0	4	4	4
1	L-Alanine	482165	294311	285954	352918	564868	359301	864963	372184	353837	540329	0.654855	-0.610753	0.190483	90591.3	235961	0.331498	0.365158	4	4	4
19	L-Arginine	110979	110979	110979	110979	113367	110979	154420	110979	110979	122436	0.906421	-0.141746	0.324446	0	21352.3	0.158076	0.1258	4	4	4
86	L-Asparagine	18919.4	18919.4	18919.4	18919.4	18919.4	18919.4	18919.4	18919.4	18919.4	18919.4	1	0	#DIV/0!	0	0	0	0	4	4	4
85	L-Aspartic acid	16369.4	16369.4	23716	25455	16369.4	16369.4	16369.4	28819	20477.5	19481.8	1.05111	0.0719085	0.80842	4796.38	6224.79	0.416421	0.285779	4	4	4
129	L-Carnitine	151793	63296	165565	94160	105073	56474.3	162952	177008	118704	125377	0.946774	-0.0789082	0.861861	48177.8	55490.2	0.568546	0.433176	4	4	4
128	L-Cystathionine	10000	10000	10000	10000	10000	10000	10000	10000	10000	10000	1	0	#DIV/0!	0	0	0	0	4	4	4
70	L-Cysteine	10819	10819	10819	10819	10819	10819	10819	10819	10819	10819	1	0	#DIV/0!	0	0	0	0	4	4	4
112	L-Cystine	10000	10000	10000	10000	10000	10000	10000	10000	10000	10000	1	0	#DIV/0!	0	0	0	0	4	4	4
16	L-Glutamic acid	4980716	4127857	9490548	9733846	839216	380150	1196714	2284206	7.08324e+06	1.17507e+06	6.02792	2.59166	0.00825451	2.94255e+06	811449	4.85777	0.581318	4	4	4
91	L-Glutamine	1261808	933898	2153521	1799989	781452	311788	582472	2744395	1537304	1.10503e+06	1.39119	0.476321	0.510454	544280	1.10973e+06	1.4814	0.76812	4	4	4
123	L-Histidine	51743.7	51921	69863	64425	51743.7	51743.7	51743.7	79736	59488.2	58741.8	1.01271	0.0182159	0.931693	9114.97	13996.1	0.28688	0.204344	4	4	4
7	L-Isoleucine	236064	230894	230894	230894	429102	230894	376226	230894	232186	316779	0.73296	-0.448193	0.146681	2585.07	101494	0.234977	0.231254	4	4	4
20	L-Kynurenine	11080.9	11080.9	11080.9	11080.9	11080.9	11080.9	11080.9	11080.9	11080.9	11080.9	1	0	#DIV/0!	0	0	0	#DIV/0!
68	L-Lactic acid	2.11588e+06	2.11588e+06	2.11588e+06	2.11588e+06	2.11588e+06	2.11588e+06	2.11588e+06	2.11588e+06	2.11588e+06	2.11588e+06	1	0	#DIV/0!	0	0	0	0	4	4	4
8	L-Leucine	231973	231973	231973	231973	332369	231973	475413	231973	231973	317932	0.72963	-0.454763	0.186086	0	115162	0.264288	0.261288	4	4	4
18	L-Lysine	29461	29461	29461	29461	29461	29461	29461	29461	29461	29461	1	0	#DIV/0!	0	0	0	0	4	4	4
83	L-Malic acid	82304.7	82304.7	96250	94084	82304.7	82304.7	82304.7	152933	88735.9	99961.8	0.887698	-0.171859	0.556835	7478.51	35314.1	0.322403	0.261986	4	4	4
92	L-Methionine	29585	20462.7	20462.7	20462.7	27856	20462.7	22811	20462.7	22743.3	22898.1	0.993239	-0.00978765	0.958735	4561.14	3485.71	0.250077	0.181621	4	4	4
133	L-Phenylalanine	70908	65144.7	65144.7	65144.7	182738	65144.7	162889	71442	66585.5	120553	0.552332	-0.856392	0.127267	2881.64	60940.6	0.280229	0.36598	4	4	4
108	L-Proline	1708344	981753	981753	981753	2220463	981753	2626606	1520248	1.1634e+06	1.83727e+06	0.633223	-0.659214	0.149757	363296	730822	0.320225	0.36479	4	4	4
71	L-Serine	160267	53110.9	53110.9	74654	358280	94581	535965	94723	85285.7	270887	0.314838	-1.66732	0.14551	51008.7	216041	0.313856	0.719098	4	4	4
90	L-Threonine	27339.1	27339.1	27339.1	27339.1	27339.1	27339.1	36954	27339.1	27339.1	29742.9	0.919183	-0.121575	0.355918	0	4807.43	0.14857	0.116594	4	4	4
40	L-Tryptophan	17860	17860	17860	17860	19565	17860	25683	17860	17860	20242	0.882324	-0.18062	0.247062	0	3715.31	0.161946	0.1324	4	4	4
134	L-Tyrosine	37819	37808.3	37808.3	37808.3	53207	37808.3	71828	37808.3	37811	50162.9	0.753764	-0.407816	0.177316	5.35714	16164.9	0.2429	0.232454	4	4	4
4	L-Valine	403859	287938	287938	287938	700883	287938	793840	287938	316918	517650	0.612225	-0.707866	0.193422	57960.5	267949	0.336103	0.396009	4	4	4
5	N-Acetyl-L-alanine	94617	70260.6	84212	93407	76846	70260.6	80730	83671	85624.1	77876.9	1.09948	0.136822	0.266615	11246.9	5796.06	0.165991	0.108903	4	4	4
126	N-Acetyl-L-methionine	10000	10000	10000	10000	10000	10000	10000	10000	10000	10000	1	0	#DIV/0!	0	0	0	0	4	4	4
41	N-Acetyl-L-phenylalanine	48260.7	48260.7	48260.7	48260.7	48260.7	48260.7	48260.7	48260.7	48260.7	48260.7	1	0	#DIV/0!	0	0	0	0	4	4	4
124	N-Acetylglutamic acid	16731.1	16731.1	16731.1	16731.1	16731.1	16731.1	16731.1	16731.1	16731.1	16731.1	1	0	#DIV/0!	0	0	0	0	4	4	4
125	N-Acetylglutamine	11761	11761	11761	11761	11761	11761	11761	11761	11761	11761	1	0	#DIV/0!	0	0	0	0	4	4	4
127	N-Acetylornithine	24500.7	24500.7	24500.7	24500.7	24500.7	24500.7	24500.7	24500.7	24500.7	24500.7	1	0	#DIV/0!	0	0	0	0	4	4	4
15	N-Acetylserine	20948.3	20948.3	20948.3	20948.3	20948.3	20948.3	20948.3	20948.3	20948.3	20948.3	1	0	#DIV/0!	0	0	0	0	4	4	4
132	N6-Acetyl-L-lysine	100492	188490	145907	79108	452300	238511	176234	50783	128499	229457	0.560015	-0.836464	0.291862	48736.8	167827	0.461396	0.594319	4	4	4
56	NAD	10000	10000	10000	10000	10000	10000	10000	10000	10000	10000	1	0	#DIV/0!	0	0	0	0	4	4	4
58	NADH	10000	10000	10000	10000	10000	10000	10000	10000	10000	10000	1	0	#DIV/0!	0	0	0	0	4	4	4
57	NADP	10000	10000	10000	10000	10000	10000	10000	10000	10000	10000	1	0	#DIV/0!	0	0	0	0	4	4	4
59	NADPH	10500.1	10500.1	10500.1	10500.1	10500.1	10500.1	10500.1	10500.1	10500.1	10500.1	1	0	#DIV/0!	0	0	0	0	4	4	4
118	Niacinamide	2222886	1117585	1771973	1223086	753144	1051728	1003351	2533264	1.58388e+06	1.33537e+06	1.1861	0.246224	0.622627	513586	809244	0.81521	0.495785	4	4	4
117	Nicotinic acid	26995.9	26995.9	26995.9	26995.9	26995.9	26995.9	26995.9	26995.9	26995.9	26995.9	1	0	#DIV/0!	0	0	0	0	4	4	4
65	O-Phosphoethanolamine	10000	10000	10000	10000	10000	10000	10000	10000	10000	10000	1	0	#DIV/0!	0	0	0	0	4	4	4
93	Ornithine	38817.6	38817.6	38817.6	38817.6	51225	38817.6	38817.6	38817.6	38817.6	41919.4	0.926004	-0.110909	0.355918	0	6203.71	0.137041	0.106753	4	4	4
98	Orotic acid	11775.1	11775.1	11775.1	11775.1	11775.1	11775.1	11775.1	11775.1	11775.1	11775.1	1	0	#DIV/0!	0	0	0	0	4	4	4
24	Orotidylic acid	10000	10000	10000	10000	10000	10000	10000	10000	10000	10000	1	0	#DIV/0!	0	0	0	0	4	4	4
55	Oxidized glutathione	10000	10000	10000	10000	10000	10000	10000	10000	10000	10000	1	0	#DIV/0!	0	0	0	0	4	4	4
121	Oxoadipic acid	18802.4	18802.4	18802.4	18802.4	18802.4	18802.4	18802.4	18802.4	18802.4	18802.4	1	0	#DIV/0!	0	0	0	0	4	4	4
105	Oxoglutaric acid	19525.4	19525.4	19525.4	19525.4	19525.4	19525.4	19525.4	19525.4	19525.4	19525.4	1	0	#DIV/0!	0	0	0	0	4	4	4
51	Palmitic acid	74343896	65775748	56282512	71057608	77904848	58553840	58745944	70851840	66864941	66514118	1.00527	0.00758937	0.956605	7.88854e+06	9.52672e+06	0.18654	0.133854	4	4	4
145	Pantothenic acid	61231	61231	61231	61231	61231	61231	61231	61231	61231	61231	1	0	#DIV/0!	0	0	0	0	4	4	4
119	Phenol	13680.1	13680.1	13680.1	13680.1	13680.1	13680.1	13680.1	13680.1	13680.1	13680.1	1	0	#DIV/0!	0	0	0	0	4	4	4
76	Phosphocreatine	10000	10000	10000	10000	10000	10000	10000	10000	10000	10000	1	0	#DIV/0!	0	0	0	0	4	4	4
67	Phosphoenolpyruvic acid	10000	10000	10000	10000	10000	10000	10000	10000	10000	10000	1	0	#DIV/0!	0	0	0	0	4	4	4
95	Phosphoribosyl pyrophosphate	10000	10000	10000	10000	10000	10000	10000	10000	10000	10000	1	0	#DIV/0!	0	0	0	0	4	4	4
97	Phosphorylcholine	19047.1	19047.1	19047.1	19047.1	19047.1	19047.1	19047.1	19047.1	19047.1	19047.1	1	0	#DIV/0!	0	0	0	0	4	4	4
73	Phosphoserine	10000	10000	11464	14284	10000	10000	10000	10000	11437	10000	1.1437	0.193709	0.204568	2019.58	0	0.201958	0.127378	4	4	4
110	Pipecolic acid	218787	218787	218787	218787	218787	218787	218787	218787	218787	218787	1	0	#DIV/0!	0	0	0	0	4	4	4
39	Propionylcarnitine	94201.4	94201.4	94201.4	94201.4	94201.4	94201.4	94201.4	94201.4	94201.4	94201.4	1	0	#DIV/0!	0	0	0	0	4	4	4
66	Pyruvic acid	92509	108739	99718	93019	76114	72938	104682	71851	98496.2	81396.2	1.21008	0.275106	0.096479	7577.47	15628.8	0.250303	0.149209	4	4	4
11	Ribose 1-phosphate	10000	10000	10000	10000	10000	10000	10000	10000	10000	10000	1	0	#DIV/0!	0	0	0	#DIV/0!
47	S-Adenosylhomocysteine	10418.3	10418.3	10418.3	10418.3	10418.3	10418.3	10418.3	10418.3	10418.3	10418.3	1	0	#DIV/0!	0	0	0	0	4	4	4
48	S-Adenosylmethionine	10000	10000	10000	10000	10000	10000	10000	10000	10000	10000	1	0	#DIV/0!	0	0	0	0	4	4	4
43	Saccharopine	10000	10000	10000	10000	10000	10000	10000	10000	10000	10000	1	0	#DIV/0!	0	0	0	0	4	4	4
2	Sarcosine	152314	152314	152314	152314	152314	152314	152314	152314	152314	152314	1	0	#DIV/0!	0	0	0	0	4	4	4
										#DIV/0!	#DIV/0!	#DIV/0!		#DIV/0!	#DIV/0!	#DIV/0!	#DIV/0!	#DIV/0!
82	Succinic acid	97072	123076	159711	177169	133028	97072	147302	135346	139257	128187	1.08636	0.1195	0.61744	36042	21665.7	0.335811	0.22298	4	4	4
64	Taurine	125062	56126	217318	125675	57385	21931	28320	327722	131045	108840	1.20402	0.267863	0.791856	66132.5	146735	1.73323	1.03841	4	4	4
29	Thymidine	10988.3	10988.3	10988.3	10988.3	10988.3	10988.3	10988.3	10988.3	10988.3	10988.3	1	0	#DIV/0!	0	0	0	0	4	4	4
77	Uracil	20882.3	20882.3	20882.3	20882.3	20882.3	20882.3	20882.3	20882.3	20882.3	20882.3	1	0	#DIV/0!	0	0	0	0	4	4	4
87	Ureidopropionic acid	11814.6	11814.6	11814.6	11814.6	11814.6	11814.6	11814.6	11814.6	11814.6	11814.6	1	0	#DIV/0!	0	0	0	0	4	4	4
106	Ureidosuccinic acid	10355.7	10355.7	10355.7	10355.7	10355.7	10355.7	10355.7	10355.7	10355.7	10355.7	1	0	#DIV/0!	0	0	0	0	4	4	4
101	Uric acid	10000	10000	10000	10000	10000	10000	10000	10000	10000	10000	1	0	#DIV/0!	0	0	0	0	4	4	4
135	Uridine	10421.7	10421.7	10421.7	10421.7	10421.7	10421.7	10421.7	10421.7	10421.7	10421.7	1	0	#DIV/0!	0	0	0	#DIV/0!
138	Uridine 5'-diphosphate	10816	10816	10816	10816	10816	10816	10816	10816	10816	10816	1	0	#DIV/0!	0	0	0	0	4	4	4
136	Uridine 5'-monophosphate	10419.1	10419.1	10419.1	10419.1	10419.1	10419.1	10419.1	10419.1	10419.1	10419.1	1	0	#DIV/0!	0	0	0	0	4	4	4
50	Uridine diphosphate glucose	10000	10000	10000	10000	10000	10000	10000	10000	10000	10000	1	0	#DIV/0!	0	0	0	0	4	4	4
52	Uridine diphosphate-N-acetylglucosamine	10000	10000	10000	10000	10000	10000	10000	10000	10000	10000	1	0	#DIV/0!	0	0	0	0	4	4	4
141	Uridine triphosphate	10000	10000	10000	10000	10000	10000	10000	10000	10000	10000	1	0	#DIV/0!	0	0	0	0	4	4	4
45	Valerylcarnitine	46608.6	46608.6	46608.6	46608.6	46608.6	46608.6	46608.6	46608.6	46608.6	46608.6	1	0	#DIV/0!	0	0	0	0	4	4	4
100	Xanthine	16174.4	16174.4	16174.4	16174.4	16174.4	16174.4	16174.4	16174.4	16174.4	16174.4	1	0	#DIV/0!	0	0	0	0	4	4	4
22	Xanthosine	10000	10000	10000	10000	10000	10000	10000	10000	10000	10000	1	0	#DIV/0!	0	0	0	0	4	4	4
26	Xanthylic acid	10000	10000	10000	10000	10000	10000	10000	10000	10000	10000	1	0	#DIV/0!	0	0	0	0	4	4	4
																			0	0	0
																			0	0	0
																			0	0	0	0	0.0585644	0	0	0.0152895	0	0	-2.90425	0.127029	-0.120021	0.152456	0	0	0	0	0.103001	-0.0131585	0	0	0	0	0	0	0.0536674	0	0	0	0
																			0	0	0
																			0	0	0
												#DIV/0!	#DIV/0!		#DIV/0!		#DIV/0!	#DIV/0!	0	0	0
												#DIV/0!	#DIV/0!		#DIV/0!		#DIV/0!	#DIV/0!	0	0	0
												#DIV/0!	#DIV/0!		#DIV/0!		#DIV/0!	#DIV/0!	0	0	0
												#DIV/0!	#DIV/0!		#DIV/0!		#DIV/0!	#DIV/0!	0	0	0
												#DIV/0!	#DIV/0!		#DIV/0!		#DIV/0!	#DIV/0!	0	0	0
												#DIV/0!	#DIV/0!		#DIV/0!		#DIV/0!	#DIV/0!	0	0	0
												#DIV/0!	#DIV/0!		#DIV/0!		#DIV/0!	#DIV/0!	0	0	0
												#DIV/0!	#DIV/0!		#DIV/0!		#DIV/0!	#DIV/0!	0	0	0
												#DIV/0!	#DIV/0!		#DIV/0!		#DIV/0!	#DIV/0!	0	0	0
												#DIV/0!	#DIV/0!		#DIV/0!		#DIV/0!	#DIV/0!	0	0	0
												#DIV/0!	#DIV/0!		#DIV/0!		#DIV/0!	#DIV/0!	0	0	0
												#DIV/0!	#DIV/0!		#DIV/0!		#DIV/0!	#DIV/0!	0	0	0
												#DIV/0!	#DIV/0!		#DIV/0!		#DIV/0!	#DIV/0!	0	0	0
												#DIV/0!	#DIV/0!		#DIV/0!		#DIV/0!	#DIV/0!	0	0	0
												#DIV/0!	#DIV/0!		#DIV/0!		#DIV/0!	#DIV/0!	0	0	0
												#DIV/0!	#DIV/0!		#DIV/0!		#DIV/0!	#DIV/0!	0	0	0
												#DIV/0!	#DIV/0!		#DIV/0!		#DIV/0!	#DIV/0!	0	0	0
												#DIV/0!	#DIV/0!		#DIV/0!		#DIV/0!	#DIV/0!	0	0	0
												#DIV/0!	#DIV/0!		#DIV/0!		#DIV/0!	#DIV/0!	0	0	0
												#DIV/0!	#DIV/0!		#DIV/0!		#DIV/0!	#DIV/0!	0	0	0
												#DIV/0!	#DIV/0!		#DIV/0!		#DIV/0!	#DIV/0!	0	0	0
												#DIV/0!	#DIV/0!		#DIV/0!		#DIV/0!	#DIV/0!	0	0	0
												#DIV/0!	#DIV/0!		#DIV/0!		#DIV/0!	#DIV/0!	0	0	0
												#DIV/0!	#DIV/0!		#DIV/0!		#DIV/0!	#DIV/0!	0	0	0
												#DIV/0!	#DIV/0!		#DIV/0!		#DIV/0!	#DIV/0!	0	0	0
												#DIV/0!	#DIV/0!		#DIV/0!		#DIV/0!	#DIV/0!	0	0	0
												#DIV/0!	#DIV/0!		#DIV/0!		#DIV/0!	#DIV/0!	0	0	0
												#DIV/0!	#DIV/0!		#DIV/0!		#DIV/0!	#DIV/0!	0	0	0
												#DIV/0!	#DIV/0!		#DIV/0!		#DIV/0!	#DIV/0!	0	0	0
												#DIV/0!	#DIV/0!		#DIV/0!		#DIV/0!	#DIV/0!	0	0	0
												#DIV/0!	#DIV/0!		#DIV/0!		#DIV/0!	#DIV/0!	0	0	0
												#DIV/0!	#DIV/0!		#DIV/0!		#DIV/0!	#DIV/0!	0	0	0
												#DIV/0!	#DIV/0!		#DIV/0!		#DIV/0!	#DIV/0!	0	0	0
												#DIV/0!	#DIV/0!		#DIV/0!		#DIV/0!	#DIV/0!	0	0	0
												#DIV/0!	#DIV/0!		#DIV/0!		#DIV/0!	#DIV/0!	0	0	0
												#DIV/0!	#DIV/0!		#DIV/0!		#DIV/0!	#DIV/0!	0	0	0
												#DIV/0!	#DIV/0!		#DIV/0!		#DIV/0!	#DIV/0!	0	0	0
												#DIV/0!	#DIV/0!		#DIV/0!		#DIV/0!	#DIV/0!	0	0	0
												#DIV/0!	#DIV/0!		#DIV/0!		#DIV/0!	#DIV/0!	0	0	0
												#DIV/0!	#DIV/0!		#DIV/0!		#DIV/0!	#DIV/0!	0	0	0
												#DIV/0!	#DIV/0!		#DIV/0!		#DIV/0!	#DIV/0!	0	0	0
												#DIV/0!	#DIV/0!		#DIV/0!		#DIV/0!	#DIV/0!	0	0	0
												#DIV/0!	#DIV/0!		#DIV/0!		#DIV/0!	#DIV/0!	0	0	0
												#DIV/0!	#DIV/0!		#DIV/0!		#DIV/0!	#DIV/0!	0	0	0
												#DIV/0!	#DIV/0!		#DIV/0!		#DIV/0!	#DIV/0!	0	0	0
												#DIV/0!	#DIV/0!		#DIV/0!		#DIV/0!	#DIV/0!	0	0	0
												#DIV/0!	#DIV/0!		#DIV/0!		#DIV/0!	#DIV/0!	0	0	0
												#DIV/0!	#DIV/0!		#DIV/0!		#DIV/0!	#DIV/0!	0	0	0
												#DIV/0!	#DIV/0!		#DIV/0!		#DIV/0!	#DIV/0!	0	0	0
												#DIV/0!	#DIV/0!		#DIV/0!		#DIV/0!	#DIV/0!	0	0	0
												#DIV/0!	#DIV/0!		#DIV/0!		#DIV/0!	#DIV/0!	0	0	0
												#DIV/0!	#DIV/0!		#DIV/0!		#DIV/0!	#DIV/0!	0	0	0
												#DIV/0!	#DIV/0!		#DIV/0!		#DIV/0!	#DIV/0!	0	0	0
												#DIV/0!	#DIV/0!		#DIV/0!		#DIV/0!	#DIV/0!	0	0	0
												#DIV/0!	#DIV/0!		#DIV/0!		#DIV/0!	#DIV/0!	0	0	0
												#DIV/0!	#DIV/0!		#DIV/0!		#DIV/0!	#DIV/0!	0	0	0
												#DIV/0!	#DIV/0!		#DIV/0!		#DIV/0!	#DIV/0!	0	0	0
												#DIV/0!	#DIV/0!		#DIV/0!		#DIV/0!	#DIV/0!	0	0	0
												#DIV/0!	#DIV/0!		#DIV/0!		#DIV/0!	#DIV/0!	0	0	0
												#DIV/0!	#DIV/0!		#DIV/0!		#DIV/0!	#DIV/0!	0	0	0
												#DIV/0!	#DIV/0!		#DIV/0!		#DIV/0!	#DIV/0!	0	0	0
												#DIV/0!	#DIV/0!		#DIV/0!		#DIV/0!	#DIV/0!	0	0	0
												#DIV/0!	#DIV/0!		#DIV/0!		#DIV/0!	#DIV/0!	0	0	0
												#DIV/0!	#DIV/0!		#DIV/0!		#DIV/0!	#DIV/0!	0	0	0
												#DIV/0!	#DIV/0!		#DIV/0!		#DIV/0!	#DIV/0!	0	0	0
												#DIV/0!	#DIV/0!		#DIV/0!		#DIV/0!	#DIV/0!	0	0	0
												#DIV/0!	#DIV/0!		#DIV/0!		#DIV/0!	#DIV/0!	0	0	0
												#DIV/0!	#DIV/0!		#DIV/0!		#DIV/0!	#DIV/0!	0	0	0
												#DIV/0!	#DIV/0!		#DIV/0!		#DIV/0!	#DIV/0!	0	0	0
												#DIV/0!	#DIV/0!		#DIV/0!		#DIV/0!	#DIV/0!	0	0	0
												#DIV/0!	#DIV/0!		#DIV/0!		#DIV/0!	#DIV/0!	0	0	0
												#DIV/0!	#DIV/0!		#DIV/0!		#DIV/0!	#DIV/0!	0	0	0
												#DIV/0!	#DIV/0!		#DIV/0!		#DIV/0!	#DIV/0!	0	0	0
												#DIV/0!	#DIV/0!		#DIV/0!		#DIV/0!	#DIV/0!	0	0	0
												#DIV/0!	#DIV/0!		#DIV/0!		#DIV/0!	#DIV/0!	0	0	0
												#DIV/0!	#DIV/0!		#DIV/0!		#DIV/0!	#DIV/0!	0	0	0
												#DIV/0!	#DIV/0!		#DIV/0!		#DIV/0!	#DIV/0!	0	0	0
												#DIV/0!	#DIV/0!		#DIV/0!		#DIV/0!	#DIV/0!	0	0	0
												#DIV/0!	#DIV/0!		#DIV/0!		#DIV/0!	#DIV/0!	0	0	0
												#DIV/0!	#DIV/0!		#DIV/0!		#DIV/0!	#DIV/0!	0	0	0
												#DIV/0!	#DIV/0!		#DIV/0!		#DIV/0!	#DIV/0!	0	0	0
												#DIV/0!	#DIV/0!		#DIV/0!		#DIV/0!	#DIV/0!	0	0	0
												#DIV/0!	#DIV/0!		#DIV/0!		#DIV/0!	#DIV/0!	0	0	0
												#DIV/0!	#DIV/0!		#DIV/0!		#DIV/0!	#DIV/0!	0	0	0
												#DIV/0!	#DIV/0!		#DIV/0!		#DIV/0!	#DIV/0!	0	0	0
												#DIV/0!	#DIV/0!		#DIV/0!		#DIV/0!	#DIV/0!	0	0	0
												#DIV/0!	#DIV/0!		#DIV/0!		#DIV/0!	#DIV/0!	0	0	0
												#DIV/0!	#DIV/0!		#DIV/0!		#DIV/0!	#DIV/0!	0	0	0
												#DIV/0!	#DIV/0!		#DIV/0!		#DIV/0!	#DIV/0!	0	0	0
												#DIV/0!	#DIV/0!		#DIV/0!		#DIV/0!	#DIV/0!	0	0	0
												#DIV/0!	#DIV/0!		#DIV/0!		#DIV/0!	#DIV/0!	0	0	0
												#DIV/0!	#DIV/0!		#DIV/0!		#DIV/0!	#DIV/0!	0	0	0
												#DIV/0!	#DIV/0!		#DIV/0!		#DIV/0!	#DIV/0!	0	0	0
												#DIV/0!	#DIV/0!		#DIV/0!		#DIV/0!	#DIV/0!	0	0	0
												#DIV/0!	#DIV/0!		#DIV/0!		#DIV/0!	#DIV/0!	0	0	0
												#DIV/0!	#DIV/0!		#DIV/0!		#DIV/0!	#DIV/0!	0	0	0
												#DIV/0!	#DIV/0!		#DIV/0!		#DIV/0!	#DIV/0!	0	0	0
												#DIV/0!	#DIV/0!		#DIV/0!		#DIV/0!	#DIV/0!	0	0	0
												#DIV/0!	#DIV/0!		#DIV/0!		#DIV/0!	#DIV/0!	0	0	0
												#DIV/0!	#DIV/0!		#DIV/0!		#DIV/0!	#DIV/0!	0	0	0
												#DIV/0!	#DIV/0!		#DIV/0!		#DIV/0!	#DIV/0!	0	0	0
												#DIV/0!	#DIV/0!		#DIV/0!		#DIV/0!	#DIV/0!	0	0	0
												#DIV/0!	#DIV/0!		#DIV/0!		#DIV/0!	#DIV/0!	0	0	0
												#DIV/0!	#DIV/0!		#DIV/0!		#DIV/0!	#DIV/0!	0	0	0
												#DIV/0!	#DIV/0!		#DIV/0!		#DIV/0!	#DIV/0!	0	0	0
												#DIV/0!	#DIV/0!		#DIV/0!		#DIV/0!	#DIV/0!	0	0	0
												#DIV/0!	#DIV/0!		#DIV/0!		#DIV/0!	#DIV/0!	0	0	0
												#DIV/0!	#DIV/0!		#DIV/0!		#DIV/0!	#DIV/0!	0	0	0
												#DIV/0!	#DIV/0!		#DIV/0!		#DIV/0!	#DIV/0!	0	0	0
												#DIV/0!	#DIV/0!		#DIV/0!			#DIV/0!	0	0	0
												#DIV/0!	#DIV/0!		#DIV/0!			#DIV/0!	0	0	0
												#DIV/0!	#DIV/0!		#DIV/0!			#DIV/0!	0	0	0
												#DIV/0!	#DIV/0!		#DIV/0!			#DIV/0!	0	0	0
												#DIV/0!			#DIV/0!			#DIV/0!	0	0	0
												#DIV/0!			#DIV/0!			#DIV/0!	0	0	0
												#DIV/0!			#DIV/0!			#DIV/0!	0	0	0
												#DIV/0!			#DIV/0!			#DIV/0!	0	0	0
												#DIV/0!			#DIV/0!			#DIV/0!	0	0	0
												#DIV/0!			#DIV/0!			#DIV/0!	0	0	0
												#DIV/0!			#DIV/0!			#DIV/0!	0	0	0
												#DIV/0!			#DIV/0!			#DIV/0!	0	0	0
												#DIV/0!			#DIV/0!			#DIV/0!	0	0	0
												#DIV/0!			#DIV/0!			#DIV/0!	0	0	0
												#DIV/0!			#DIV/0!			#DIV/0!	0	0	0
												#DIV/0!			#DIV/0!			#DIV/0!	0	0	0
												#DIV/0!			#DIV/0!			#DIV/0!	0	0	0
												#DIV/0!			#DIV/0!			#DIV/0!	0	0	0
												#DIV/0!			#DIV/0!			#DIV/0!	0	0	0
												#DIV/0!			#DIV/0!			#DIV/0!	0	0	0
												#DIV/0!			#DIV/0!			#DIV/0!	0	0	0
												#DIV/0!			#DIV/0!			#DIV/0!	0	0	0
												#DIV/0!			#DIV/0!			#DIV/0!	0	0	0
												#DIV/0!			#DIV/0!			#DIV/0!	0	0	0
												#DIV/0!			#DIV/0!			#DIV/0!	0	0	0
												#DIV/0!			#DIV/0!			#DIV/0!	0	0	0
												#DIV/0!			#DIV/0!			#DIV/0!	0	0	0
												#DIV/0!			#DIV/0!			#DIV/0!	0	0	0
												#DIV/0!			#DIV/0!				0	0	0
												#DIV/0!			#DIV/0!				0	0	0
												#DIV/0!			#DIV/0!				0	0	0
												#DIV/0!			#DIV/0!				0	0	0
												#DIV/0!			#DIV/0!				0	0	0
												#DIV/0!			#DIV/0!				0	0	0
												#DIV/0!			#DIV/0!				0	0	0
												#DIV/0!			#DIV/0!				0	0	0
												#DIV/0!			#DIV/0!				0	0	0
												#DIV/0!			#DIV/0!				0	0	0
												#DIV/0!			#DIV/0!				0	0	0
												#DIV/0!			#DIV/0!				0	0	0
												#DIV/0!			#DIV/0!				0	0	0
												#DIV/0!							0	0	0
												#DIV/0!							0	0	0
												#DIV/0!							0	0	0
												#DIV/0!							0	0	0
												#DIV/0!							0	0	0
												#DIV/0!							0	0	0
												#DIV/0!							0	0	0
												#DIV/0!							0	0	0
												#DIV/0!							0	0	0
												#DIV/0!							0	0	0
												#DIV/0!							0	0	0
												#DIV/0!							0	0	0
												#DIV/0!							0	0	0
												#DIV/0!							0	0	0
												#DIV/0!							0	0	0
												#DIV/0!							0	0	0
												#DIV/0!							0	0	0
												#DIV/0!							0	0	0
												#DIV/0!							0	0	0
												#DIV/0!							0	0	0
												#DIV/0!							0	0	0
												#DIV/0!							0	0	0
												#DIV/0!							0	0	0
												#DIV/0!							0	0	0
												#DIV/0!							0	0	0
												#DIV/0!							0	0	0
												#DIV/0!							0	0	0
												#DIV/0!							0	0	0
												#DIV/0!							0	0	0
												#DIV/0!							0	0	0
												#DIV/0!							0	0	0
[truncated: 97 more columns]

## Sheet: Fig 4E
Metabolite	uninfected sample 1	uninfected sample 2	uninfected sample 3	uninfected sample 4	SV-Tag infected, sample 1	SV-Tag infected, sample 2	SV-Tag infected, sample 3	SV-Tag infected, sample 4	average uninfected	average SV-tag infected	fold change	log2 fold change	ttest pValue	stdev infected	stdev uninfected	stdev ratio	SEM log2 fold change	count infected	count uninfected	minimum
1-Methylnicotinamide	55899	55899	55899	55899	55899	55899	55899	55899	55899	55899	1	0	#DIV/0!	0	0	0	0	4	4	4
2,3-Diphosphoglyceric acid	10000	10000	10000	10000	10000	10000	10000	10000	10000	10000	1	0	#DIV/0!	0	0	0	0	4	4	4
3-Hydroxybutyric acid	21349.5	21349.5	21349.5	21349.5	21349.5	21349.5	21349.5	21349.5	21349.5	21349.5	1	0	#DIV/0!	0	0	0	0	4	4	4
3-Phosphoglyceric acid	10000	10000	10000	10000	10000	10000	10000	10000	10000	10000	1	0	#DIV/0!	0	0	0	0	4	4	4
4-Hydroxyproline	24357.5	24357.5	24357.5	24357.5	24357.5	24357.5	24357.5	24357.5	24357.5	24357.5	1	0	#DIV/0!	0	0	0	0	4	4	4
4,5-Dihydroorotic acid	22845.5	22845.5	22845.5	22845.5	22845.5	22845.5	22845.5	22845.5	22845.5	22845.5	1	0	#DIV/0!	0	0	0	0	4	4	4
5-Phosphoribosylamine	10000	10000	10000	10000	10000	10000	10000	10000	10000	10000	1	0	#DIV/0!	0	0	0	0	4	4	4
5'-Methylthioadenosine	10000	10000	10000	10000	10000	10000	10000	10000	10000	10000	1	0	#DIV/0!	0	0	0	0	4	4	4
6-Phosphogluconic acid	10000	10000	10000	10000	10000	10000	10000	10000	10000	10000	1	0	#DIV/0!	0	0	0	0	4	4	4
Acetoacetic acid	10000	10000	10000	10000	10000	10000	10000	10000	10000	10000	1	0	#DIV/0!	0	0	0	0	4	4	4
Acetyl-CoA	11649	11649	11649	11649	11649	11649	11649	11649	11649	11649	1	0	#DIV/0!	0	0	0	0	4	4	4
														#DIV/0!	#DIV/0!	#DIV/0!	#DIV/0!
Acetylcysteine	10000	10000	10000	10000	10000	10000	10000	10000	10000	10000	1	0	#DIV/0!	0	0	0	0	4	4	4
Adenine	17505740	16796268	12360629	16157470	18622440	17873206	15607472	14807115	1.5705e+07	1.67276e+07	1.06511	0.0910005	0.510644	1.81161e+06	2.2966e+06	0.193818	0.131264	4	4	4
Adenosine	7402780	6182353	5817523	5955524	7406089	6931795	7220346	5887570	6339545	6861450	1.08233	0.114134	0.33335	677945	724605	0.163523	0.108985	4	4	4
Adenosine diphosphate ribose	12168	12168	12168	12168	12168	12168	12168	12168	12168	12168	1	0	#DIV/0!	0	0	0	0	4	4	4
Adenosine monophosphate	1599396	1651416	2234647	1878979	1231951	1600482	1820652	2135514	1.84111e+06	1.69715e+06	0.921808	-0.117462	0.568566	379987	289088	0.252085	0.197265	4	4	4
Adenosine triphosphate	11835.5	11835.5	11835.5	11835.5	11835.5	11835.5	11835.5	11835.5	11835.5	11835.5	1	0	#DIV/0!	0	0	0	0	4	4	4
Adenylsuccinic acid	10000	10000	10000	10000	10000	10000	10000	10000	10000	10000	1	0	#DIV/0!	0	0	0	0	4	4	4
ADP	24153.5	24153.5	24153.5	24153.5	24153.5	24153.5	24153.5	24153.5	24153.5	24153.5	1	0	#DIV/0!	0	0	0	0	4	4	4
														#DIV/0!	#DIV/0!	#DIV/0!	#DIV/0!
Allantoin	11550	11550	12874	11550	11550	11550	11550	11550	11881	11550	0.97214	-0.0407634	0.355918	0	662	0.0541669	0.0401929	4	4	4
Aminoadipic acid	179454	179454	179454	179454	179454	179454	179454	179454	179454	179454	1	0	#DIV/0!	0	0	0	0	4	4	4
Argininosuccinic acid	11944	11944	11944	11944	11944	11944	11944	11944	11944	11944	1	0	#DIV/0!	0	0	0	0	4	4	4
Beta-Alanine	56135.5	56135.5	56135.5	56135.5	56135.5	56135.5	56135.5	56135.5	56135.5	56135.5	1	0	#DIV/0!	0	0	0	0	4	4	4
Betaine	808296	808296	808296	808296	808296	808296	808296	808296	808296	808296	1	0	#DIV/0!	0	0	0	0	4	4	4
Butyrylcarnitine	18288.5	18288.5	18288.5	18288.5	18288.5	18288.5	18288.5	18288.5	18288.5	18288.5	1	0	#DIV/0!	0	0	0	0	4	4	4
Carbamoyl phosphate	14663.5	14663.5	14663.5	14663.5	14663.5	14663.5	14663.5	14663.5	14663.5	14663.5	1	0	#DIV/0!	0	0	0	0	4	4	4
Carnosine	10697.5	10697.5	10697.5	10697.5	10697.5	10697.5	10697.5	10697.5	10697.5	10697.5	1	0	#DIV/0!	0	0	0	0	4	4	4
CDP	11059	11059	11059	11059	11059	11059	11059	11059	11059	11059	1	0	#DIV/0!	0	0	0	0	4	4	4
Choline	106437	106437	106437	106437	106437	106437	106437	106437	106437	106437	1	0	#DIV/0!	0	0	0	0	4	4	4
cis-Aconitic acid	26635.5	26635.5	26635.5	26635.5	26635.5	26635.5	26635.5	26635.5	26635.5	26635.5	1	0	#DIV/0!	0	0	0	0	4	4	4
Citric acid	53999.5	53999.5	53999.5	53999.5	53999.5	53999.5	53999.5	53999.5	53999.5	53999.5	1	0	#DIV/0!	0	0	0	0	4	4	4
Citrulline	17146	17146	17146	17146	17146	17146	17146	17146	17146	17146	1	0	#DIV/0!	0	0	0	0	4	4	4
Creatine	4410886	2496498	2721972	3534299	4792476	3133970	4271007	3510327	3.29091e+06	3926945	1.19327	0.254919	0.309398	746079	869553	0.38834	0.234757	4	4	4
Creatinine	143278	143278	143278	143278	143278	143278	143278	143278	143278	143278	1	0	#DIV/0!	0	0	0	0	4	4	4
Cyclic AMP	20482	20508	18520	12870	19467	23306	18569	16191	18095	19383.2	1.07119	0.0992194	0.600593	2957.95	3605.62	0.268852	0.181046	4	4	4
Cytidine	16229.5	16229.5	16229.5	16229.5	16229.5	16229.5	16229.5	16229.5	16229.5	16229.5	1	0	#DIV/0!	0	0	0	0	4	4	4
Cytidine monophosphate	13345.5	13345.5	13345.5	13345.5	13345.5	13345.5	13345.5	13345.5	13345.5	13345.5	1	0	#DIV/0!	0	0	0	0	4	4	4
Cytidine triphosphate	10000	10000	10000	10000	10000	10000	10000	10000	10000	10000	1	0	#DIV/0!	0	0	0	0	4	4	4
Cytosine	59746.5	59746.5	59746.5	59746.5	59746.5	59746.5	59746.5	59746.5	59746.5	59746.5	1	0	#DIV/0!	0	0	0	0	4	4	4
D-2-Hydroxyglutaric acid	247686	247686	247686	247686	247686	247686	247686	247686	247686	247686	1	0	#DIV/0!	0	0	0	0	4	4	4
D-Glucose	120203	120203	120203	120203	120203	120203	120203	120203	120203	120203	1	0	#DIV/0!	0	0	0	0	4	4	4
D-Glyceraldehyde 3-phosphate	10000	10000	10000	10000	10000	10000	10000	10000	10000	10000	1	0	#DIV/0!	0	0	0	0	4	4	4
D-Ribose 5-phosphate	10000	10000	10000	10000	10000	10000	10000	10000	10000	10000	1	0	#DIV/0!	0	0	0	0	4	4	4
D-Sedoheptulose 7-phosphate	10000	10000	10000	10000	10000	10000	10000	10000	10000	10000	1	0	#DIV/0!	0	0	0	0	4	4	4
Dihydrofolic acid	11608.5	11608.5	11608.5	11608.5	11608.5	11608.5	11608.5	11608.5	11608.5	11608.5	1	0	#DIV/0!	0	0	0	0	4	4	4
Dihydroxyacetone phosphate	10000	10000	10000	10000	10000	10000	10000	10000	10000	10000	1	0	#DIV/0!	0	0	0	0	4	4	4
dTDP	10000	10000	10000	10000	10000	10000	10000	10000	10000	10000	1	0	#DIV/0!	0	0	0	0	4	4	4
														#DIV/0!	#DIV/0!	#DIV/0!	#DIV/0!
FAD	11249.5	11249.5	11249.5	11249.5	11249.5	11249.5	11249.5	11249.5	11249.5	11249.5	1	0	#DIV/0!	0	0	0	0	4	4	4
Folic acid	10000	10000	10000	10000	10000	10000	10000	10000	10000	10000	1	0	#DIV/0!	0	0	0	0	4	4	4
Fructose 1,6-bisphosphate	10000	10000	10000	10000	10000	10000	10000	10000	10000	10000	1	0	#DIV/0!	0	0	0	0	4	4	4
Fructose 6-phosphate	10000	10000	10000	10000	10000	10000	10000	10000	10000	10000	1	0	#DIV/0!	0	0	0	0	4	4	4
Fumaric acid	21034	21034	21034	21034	21034	21034	21034	21034	21034	21034	1	0	#DIV/0!	0	0	0	0	4	4	4
GABA	1822161	1822161	1822161	1822161	3957100	5467146	7429040	9451212	1822161	6.57612e+06	3.60897	1.85159	0.00724636	2.38626e+06	0	1.30958	0.261753	4	4	4
GABA-13C	6092504	5651793	6757258	6017118	6543162	6162315	6967086	6671262	6.12967e+06	6.58596e+06	1.07444	0.103584	0.159664	333587	460537	0.0973564	0.0653623	4	4	4
Glucose 6-phosphate	10000	10000	10000	10000	10000	10000	10000	10000	10000	10000	1	0	#DIV/0!	0	0	0	0	4	4	4
Glutathione	10886.5	10886.5	10886.5	10886.5	10886.5	10886.5	10886.5	10886.5	10886.5	10886.5	1	0	#DIV/0!	0	0	0	0	4	4	4
Glycerol 3-phosphate	10000	10000	10000	10000	10000	10000	10000	10000	10000	10000	1	0	#DIV/0!	0	0	0	0	4	4	4
Glycine	20359.5	20359.5	20359.5	20359.5	20359.5	20359.5	20359.5	20359.5	20359.5	20359.5	1	0	#DIV/0!	0	0	0	0	4	4	4
Guanidoacetic acid	19747.5	19747.5	19747.5	19747.5	19747.5	19747.5	19747.5	19747.5	19747.5	19747.5	1	0	#DIV/0!	0	0	0	0	4	4	4
Guanine	15400.5	15400.5	15400.5	15400.5	15400.5	15400.5	15400.5	15400.5	15400.5	15400.5	1	0	#DIV/0!	0	0	0	0	4	4	4
Guanosine	13164.5	13164.5	13164.5	13164.5	13164.5	13164.5	13164.5	13164.5	13164.5	13164.5	1	0	#DIV/0!	0	0	0	0	4	4	4
Guanosine diphosphate	10000	10000	10000	10000	10000	10000	10000	10000	10000	10000	1	0	#DIV/0!	0	0	0	0	4	4	4
Guanosine monophosphate	15144.5	15144.5	15144.5	15144.5	15144.5	15144.5	15144.5	15144.5	15144.5	15144.5	1	0	#DIV/0!	0	0	0	0	4	4	4
Guanosine triphosphate	10000	10000	10000	10000	10000	10000	10000	10000	10000	10000	1	0	#DIV/0!	0	0	0	0	4	4	4
Homocysteine	10000	10000	10000	10000	10000	10000	10000	10000	10000	10000	1	0	#DIV/0!	0	0	0	0	4	4	4
Hypotaurine	10000	10000	10000	10000	10000	10000	10000	10000	10000	10000	1	0	#DIV/0!	0	0	0	0	4	4	4
Hypoxanthine	186197	168771	108271	102583	191834	158000	134028	144250	141456	157028	1.11009	0.150674	0.550145	25197.1	42269.9	0.376518	0.244666	4	4	4
Inosine	19376	19155	19571	16328	21240	19263	15925	16127	18607.5	18138.8	0.974809	-0.0368092	0.764582	2570.96	1529.14	0.159711	0.118185	4	4	4
Inosinic acid	12256	12256	12256	12256	12256	12256	12256	12256	12256	12256	1	0	#DIV/0!	0	0	0	0	4	4	4
L-Acetylcarnitine	25620.5	25620.5	25620.5	25620.5	25620.5	25620.5	25620.5	25620.5	25620.5	25620.5	1	0	#DIV/0!	0	0	0	0	4	4	4
L-Alanine	88029.5	88029.5	88029.5	88029.5	88029.5	88029.5	88029.5	88029.5	88029.5	88029.5	1	0	#DIV/0!	0	0	0	0	4	4	4
L-Arginine	15325.5	15325.5	15325.5	15325.5	15325.5	15325.5	15325.5	15325.5	15325.5	15325.5	1	0	#DIV/0!	0	0	0	0	4	4	4
L-Asparagine	18772	18772	18772	18772	18772	18772	18772	18772	18772	18772	1	0	#DIV/0!	0	0	0	0	4	4	4
L-Aspartic acid	112275	112275	112275	112275	112275	112275	112275	112275	112275	112275	1	0	#DIV/0!	0	0	0	0	4	4	4
L-Carnitine	69781	69781	69781	69781	69781	70004	69781	69781	69781	69836.8	1.0008	0.00115215	0.355918	111.5	0	0.00159786	0.00115169	4	4	4
L-Cystathionine	10000	10000	10000	10000	10000	10000	10000	10000	10000	10000	1	0	#DIV/0!	0	0	0	0	4	4	4
L-Cysteine	10000	10000	10000	10000	10000	10000	10000	10000	10000	10000	1	0	#DIV/0!	0	0	0	0	4	4	4
L-Cystine	10000	10000	10000	10000	10000	10000	10000	10000	10000	10000	1	0	#DIV/0!	0	0	0	0	4	4	4
L-Glutamic acid	94197	152880	98908	116465	497580	553764	494316	383669	115612	482332	4.17197	2.06073	7.10628e-05	71211	26628.7	1.14138	0.197349	4	4	4
L-Glutamine	73567	49346	68458	64743	86516	59143	76286	59311	64028.5	70314	1.09817	0.135098	0.488424	13466.3	10435.4	0.276165	0.181403	4	4	4
L-Histidine	83836	83836	83836	83836	83836	83836	83836	83836	83836	83836	1	0	#DIV/0!	0	0	0	0	4	4	4
L-Isoleucine	247593	247593	247593	247593	247593	247593	247593	247593	247593	247593	1	0	#DIV/0!	0	0	0	0	4	4	4
L-Kynurenine	10818.5	10818.5	10818.5	10818.5	10818.5	10818.5	10818.5	10818.5	10818.5	10818.5	1	0	#DIV/0!	0	0	0	0	4	4	4
L-Lactic acid	7508766	7508766	7508766	7508766	7508766	7508766	7508766	7508766	7508766	7508766	1	0	#DIV/0!	0	0	0	0	4	4	4
L-Leucine	196612	196612	196612	196612	196612	196612	196612	196612	196612	196612	1	0	#DIV/0!	0	0	0	0	4	4	4
L-Lysine	33643.5	33643.5	33643.5	33643.5	33643.5	33643.5	33643.5	33643.5	33643.5	33643.5	1	0	#DIV/0!	0	0	0	0	4	4	4
L-Malic acid	170990	170990	170990	170990	170990	170990	170990	170990	170990	170990	1	0	#DIV/0!	0	0	0	0	4	4	4
L-Methionine	10000	10000	10000	10000	10000	10000	10000	10000	10000	10000	1	0	#DIV/0!	0	0	0	0	4	4	4
L-Phenylalanine	64762	64762	64762	64762	64762	64762	64762	64762	64762	64762	1	0	#DIV/0!	0	0	0	0	4	4	4
L-Proline	672830	672830	672830	672830	672830	672830	672830	672830	672830	672830	1	0	#DIV/0!	0	0	0	0	4	4	4
L-Serine	16046.5	16046.5	16046.5	16046.5	16046.5	16046.5	16046.5	16046.5	16046.5	16046.5	1	0	#DIV/0!	0	0	0	0	4	4	4
L-Threonine	21648	21648	21648	21648	21648	21648	21648	21648	21648	21648	1	0	#DIV/0!	0	0	0	0	4	4	4
L-Tryptophan	10921.5	10921.5	10921.5	10921.5	10921.5	10921.5	10921.5	10921.5	10921.5	10921.5	1	0	#DIV/0!	0	0	0	0	4	4	4
L-Tyrosine	18794.5	18794.5	18794.5	18794.5	18794.5	18794.5	18794.5	18794.5	18794.5	18794.5	1	0	#DIV/0!	0	0	0	0	4	4	4
L-Valine	456446	456446	456446	456446	456446	456446	456446	456446	456446	456446	1	0	#DIV/0!	0	0	0	0	4	4	4
N-Acetyl-L-alanine	29548.5	29548.5	29548.5	29548.5	29548.5	29548.5	29548.5	29548.5	29548.5	29548.5	1	0	#DIV/0!	0	0	0	0	4	4	4
N-Acetyl-L-methionine	10000	10000	10000	10000	10000	10000	10000	10000	10000	10000	1	0	#DIV/0!	0	0	0	0	4	4	4
N-Acetyl-L-phenylalanine	65991	65991	65991	65991	65991	65991	65991	65991	65991	65991	1	0	#DIV/0!	0	0	0	0	4	4	4
N-Acetylglutamic acid	10000	10000	10000	10000	10000	10000	10000	10000	10000	10000	1	0	#DIV/0!	0	0	0	0	4	4	4
N-Acetylglutamine	60813	60813	60813	60813	60813	60813	60813	60813	60813	60813	1	0	#DIV/0!	0	0	0	0	4	4	4
N-Acetylornithine	17586.5	17586.5	17586.5	17586.5	17586.5	17586.5	17586.5	17586.5	17586.5	17586.5	1	0	#DIV/0!	0	0	0	0	4	4	4
N-Acetylserine	49992	49992	49992	49992	49992	49992	49992	49992	49992	49992	1	0	#DIV/0!	0	0	0	0	4	4	4
N6-Acetyl-L-lysine	209512	209512	209512	209512	209512	209512	209512	209512	209512	209512	1	0	#DIV/0!	0	0	0	0	4	4	4
NAD	11992	11992	11992	11992	11992	11992	11992	11992	11992	11992	1	0	#DIV/0!	0	0	0	0	4	4	4
NADH	11957.5	11957.5	11957.5	11957.5	11957.5	11957.5	11957.5	11957.5	11957.5	11957.5	1	0	#DIV/0!	0	0	0	0	4	4	4
NADP	10000	10000	10000	10000	10000	10000	10000	10000	10000	10000	1	0	#DIV/0!	0	0	0	0	4	4	4
NADPH	10000	10000	10000	10000	10000	10000	10000	10000	10000	10000	1	0	#DIV/0!	0	0	0	0	4	4	4
Niacinamide	776351	776351	776351	776351	776351	776351	776351	776351	776351	776351	1	0	#DIV/0!	0	0	0	0	4	4	4
Nicotinic acid	63715	63715	63715	63715	63715	63715	63715	63715	63715	63715	1	0	#DIV/0!	0	0	0	0	4	4	4
O-Phosphoethanolamine	13946	13946	13946	13946	13946	13946	13946	13946	13946	13946	1	0	#DIV/0!	0	0	0	0	4	4	4
Ornithine	27092	27092	27092	27092	27092	27092	27092	27092	27092	27092	1	0	#DIV/0!	0	0	0	0	4	4	4
Orotic acid	18901.5	18901.5	18901.5	18901.5	18901.5	18901.5	18901.5	18901.5	18901.5	18901.5	1	0	#DIV/0!	0	0	0	0	4	4	4
Orotidylic acid	10000	10000	10000	10000	10000	10000	10000	10000	10000	10000	1	0	#DIV/0!	0	0	0	0	4	4	4
Oxidized glutathione	37381	37381	37381	37381	37381	37381	37381	37381	37381	37381	1	0	#DIV/0!	0	0	0	0	4	4	4
Oxoadipic acid	78972.5	78972.5	78972.5	78972.5	78972.5	78972.5	78972.5	78972.5	78972.5	78972.5	1	0	#DIV/0!	0	0	0	0	4	4	4
Oxoglutaric acid	41851	41851	41851	41851	41851	41851	41851	41851	41851	41851	1	0	#DIV/0!	0	0	0	0	4	4	4
Palmitic acid	4571034	4571034	5326054	4571034	4571034	4571034	4571034	4571034	4759789	4571034	0.960344	-0.0583771	0.355918	0	377510	0.0761671	0.0572118	4	4	4
Pantothenic acid	17710	17710	17710	17710	17710	17710	17710	17710	17710	17710	1	0	#DIV/0!	0	0	0	0	4	4	4
Phenol	21208	21208	21208	21208	21208	21208	21208	21208	21208	21208	1	0	#DIV/0!	0	0	0	0	4	4	4
Phosphocreatine	10000	10000	10000	10000	10000	10000	10000	10000	10000	10000	1	0	#DIV/0!	0	0	0	0	4	4	4
Phosphoenolpyruvic acid	11460	11460	11460	11460	11460	11460	11460	11460	11460	11460	1	0	#DIV/0!	0	0	0	0	4	4	4
Phosphoribosyl pyrophosphate	10000	10000	10000	10000	10000	10000	10000	10000	10000	10000	1	0	#DIV/0!	0	0	0	0	4	4	4
Phosphorylcholine	11151	11151	11151	11151	11151	11151	11151	11151	11151	11151	1	0	#DIV/0!	0	0	0	0	4	4	4
Phosphoserine	10000	10000	10000	10000	10000	10000	10000	10000	10000	10000	1	0	#DIV/0!	0	0	0	0	4	4	4
Pipecolic acid	164160	164160	164160	164160	164160	164160	164160	164160	164160	164160	1	0	#DIV/0!	0	0	0	0	4	4	4
Propionylcarnitine	31380.5	31380.5	31380.5	31380.5	31380.5	31380.5	31380.5	31380.5	31380.5	31380.5	1	0	#DIV/0!	0	0	0	0	4	4	4
Pyruvic acid	294958	294958	294958	294958	294958	294958	294958	294958	294958	294958	1	0	#DIV/0!	0	0	0	0	4	4	4
Ribose 1-phosphate	10000	10000	10000	10000	10000	10000	10000	10000	10000	10000	1	0	#DIV/0!	0	0	0	0	4	4	4
S-Adenosylhomocysteine	10000	10000	10000	10000	10000	10000	10000	10000	10000	10000	1	0	#DIV/0!	0	0	0	0	4	4	4
S-Adenosylmethionine	10000	10000	10000	10000	10000	10000	10000	10000	10000	10000	1	0	#DIV/0!	0	0	0	0	4	4	4
Saccharopine	17148	17148	17148	17148	17148	17148	17148	17148	17148	17148	1	0	#DIV/0!	0	0	0	0	4	4	4
Sarcosine	78932.5	78932.5	78932.5	78932.5	78932.5	78932.5	78932.5	78932.5	78932.5	78932.5	1	0	#DIV/0!	0	0	0	#DIV/0!
														#DIV/0!	#DIV/0!	#DIV/0!	#DIV/0!	0	0	0
Succinic acid	295278	295278	295278	295278	397489	295278	331051	297577	295278	330349	1.11877	0.161914	0.191457	47652.3	0	0.161381	0.104053	4	4	4
Taurine	45405	29508	27984	60766	50845	63775	51112	44729	40915.8	52615.2	1.28594	0.362825	0.226265	8002.64	15400.8	0.522055	0.292846	4	4	4
Thymidine	10000	10000	10000	10000	10000	10000	10000	10000	10000	10000	1	0	#DIV/0!	0	0	0	0	4	4	4
Uracil	15465.5	15465.5	15465.5	15465.5	15465.5	15465.5	15465.5	15465.5	15465.5	15465.5	1	0	#DIV/0!	0	0	0	0	4	4	4
Ureidopropionic acid	20760.5	20760.5	20760.5	20760.5	20760.5	20760.5	20760.5	20760.5	20760.5	20760.5	1	0	#DIV/0!	0	0	0	0	4	4	4
Ureidosuccinic acid	10000	10000	10000	10000	10000	10000	10000	10000	10000	10000	1	0	#DIV/0!	0	0	0	0	4	4	4
Uric acid	10000	10000	10000	10000	10000	10000	10000	10000	10000	10000	1	0	#DIV/0!	0	0	0	0	4	4	4
Uridine	30268.5	30268.5	30268.5	30268.5	30268.5	30268.5	30268.5	30268.5	30268.5	30268.5	1	0	#DIV/0!	0	0	0	0	4	4	4
Uridine 5'-diphosphate	10000	10000	10000	10000	10000	10000	10000	10000	10000	10000	1	0	#DIV/0!	0	0	0	0	4	4	4
Uridine 5'-monophosphate	11821	11821	11821	11821	11821	11821	11821	11821	11821	11821	1	0	#DIV/0!	0	0	0	0	4	4	4
Uridine diphosphate glucose	11511	11511	11511	11511	11511	11511	11511	11511	11511	11511	1	0	#DIV/0!	0	0	0	0	4	4	4
Uridine diphosphate-N-acetylglucosamine	10000	10000	10000	10000	10000	10000	10000	10000	10000	10000	1	0	#DIV/0!	0	0	0	0	4	4	4
Uridine triphosphate	10000	10000	10000	10000	10000	10000	10000	10000	10000	10000	1	0	#DIV/0!	0	0	0	0	4	4	4
Valerylcarnitine	18656.5	18656.5	18656.5	18656.5	18656.5	18656.5	18656.5	18656.5	18656.5	18656.5	1	0	#DIV/0!	0	0	0	0	4	4	4
Xanthine	28746.5	28746.5	28746.5	28746.5	28746.5	28746.5	28746.5	28746.5	28746.5	28746.5	1	0	#DIV/0!	0	0	0	0	4	4	4
Xanthosine	12417.5	12417.5	12417.5	12417.5	12417.5	12417.5	12417.5	12417.5	12417.5	12417.5	1	0	#DIV/0!	0	0	0	0	4	4	4
Xanthylic acid	10000	10000	10000	10000	10000	10000	10000	10000	10000	10000	1	0	#DIV/0!	0	0	0	0	4	4	4
														#DIV/0!		#DIV/0!	#DIV/0!	0	0	0
														#DIV/0!		#DIV/0!	#DIV/0!	0	0	0
														#DIV/0!		#DIV/0!	#DIV/0!	0	0	0
0	0	0	0	0	0	0	0	0	0.114134	0	0	0	0	0		#DIV/0!	#DIV/0!	4	4	4	0.254919	0	0.0992194	0	0	0	0	0	0	0	0	0	0	0	0	0	0	0	0	0	1.85159	0.103584	0	0	0	0	0	0	0
0	0	0.0981892	0	0	0	0	0	0	0.170154	0	0.231977	0	0	0		#DIV/0!	#DIV/0!	4	4	4	-0.23382	0	0.0121472	0	0	0	0	0	0	0	0	0	0	0	0	0	0	0	0	0	0.431015	0.00942262	0	0	0	0	0	0	0
														#DIV/0!		#DIV/0!	#DIV/0!	0	0	0
														#DIV/0!		#DIV/0!	#DIV/0!	0	0	0
														#DIV/0!		#DIV/0!	#DIV/0!	0	0	0
														#DIV/0!		#DIV/0!	#DIV/0!	0	0	0
														#DIV/0!		#DIV/0!	#DIV/0!	0	0	0
														#DIV/0!		#DIV/0!	#DIV/0!	0	0	0
														#DIV/0!		#DIV/0!	#DIV/0!	0	0	0
														#DIV/0!		#DIV/0!	#DIV/0!	0	0	0
														#DIV/0!		#DIV/0!	#DIV/0!	0	0	0
														#DIV/0!		#DIV/0!	#DIV/0!	0	0	0
														#DIV/0!		#DIV/0!	#DIV/0!	0	0	0
														#DIV/0!		#DIV/0!	#DIV/0!	0	0	0
														#DIV/0!		#DIV/0!	#DIV/0!	0	0	0
														#DIV/0!		#DIV/0!	#DIV/0!	0	0	0
														#DIV/0!		#DIV/0!	#DIV/0!	0	0	0
														#DIV/0!		#DIV/0!	#DIV/0!	0	0	0
														#DIV/0!		#DIV/0!	#DIV/0!	0	0	0
														#DIV/0!		#DIV/0!	#DIV/0!	0	0	0
														#DIV/0!		#DIV/0!	#DIV/0!	0	0	0
														#DIV/0!		#DIV/0!	#DIV/0!	0	0	0
														#DIV/0!		#DIV/0!	#DIV/0!	0	0	0
														#DIV/0!		#DIV/0!	#DIV/0!	0	0	0
														#DIV/0!		#DIV/0!	#DIV/0!	0	0	0
														#DIV/0!		#DIV/0!	#DIV/0!	0	0	0
														#DIV/0!		#DIV/0!	#DIV/0!	0	0	0
														#DIV/0!		#DIV/0!	#DIV/0!	0	0	0
														#DIV/0!		#DIV/0!	#DIV/0!	0	0	0
														#DIV/0!		#DIV/0!	#DIV/0!	0	0	0
														#DIV/0!		#DIV/0!	#DIV/0!	0	0	0
														#DIV/0!		#DIV/0!	#DIV/0!	0	0	0
														#DIV/0!		#DIV/0!	#DIV/0!	0	0	0
														#DIV/0!		#DIV/0!	#DIV/0!	0	0	0
														#DIV/0!		#DIV/0!	#DIV/0!	0	0	0
														#DIV/0!		#DIV/0!	#DIV/0!	0	0	0
														#DIV/0!		#DIV/0!	#DIV/0!	0	0	0
														#DIV/0!		#DIV/0!	#DIV/0!	0	0	0
														#DIV/0!		#DIV/0!	#DIV/0!	0	0	0
														#DIV/0!		#DIV/0!	#DIV/0!	0	0	0
														#DIV/0!		#DIV/0!	#DIV/0!	0	0	0
														#DIV/0!		#DIV/0!	#DIV/0!	0	0	0
														#DIV/0!		#DIV/0!	#DIV/0!	0	0	0
														#DIV/0!		#DIV/0!	#DIV/0!	0	0	0
														#DIV/0!		#DIV/0!	#DIV/0!	0	0	0
														#DIV/0!		#DIV/0!	#DIV/0!	0	0	0
														#DIV/0!		#DIV/0!	#DIV/0!	0	0	0
														#DIV/0!		#DIV/0!	#DIV/0!	0	0	0
														#DIV/0!		#DIV/0!	#DIV/0!	0	0	0
														#DIV/0!		#DIV/0!	#DIV/0!	0	0	0
														#DIV/0!		#DIV/0!	#DIV/0!	0	0	0
														#DIV/0!		#DIV/0!	#DIV/0!	0	0	0
														#DIV/0!		#DIV/0!	#DIV/0!	0	0	0
														#DIV/0!		#DIV/0!	#DIV/0!	0	0	0
														#DIV/0!		#DIV/0!	#DIV/0!	0	0	0
														#DIV/0!		#DIV/0!	#DIV/0!	0	0	0
														#DIV/0!		#DIV/0!	#DIV/0!	0	0	0
														#DIV/0!		#DIV/0!	#DIV/0!	0	0	0
														#DIV/0!		#DIV/0!	#DIV/0!	0	0	0
														#DIV/0!		#DIV/0!	#DIV/0!	0	0	0
														#DIV/0!		#DIV/0!	#DIV/0!	0	0	0
														#DIV/0!		#DIV/0!	#DIV/0!	0	0	0
														#DIV/0!		#DIV/0!	#DIV/0!	0	0	0
														#DIV/0!		#DIV/0!	#DIV/0!	0	0	0
														#DIV/0!		#DIV/0!	#DIV/0!	0	0	0
														#DIV/0!		#DIV/0!	#DIV/0!	0	0	0
														#DIV/0!		#DIV/0!	#DIV/0!	0	0	0
														#DIV/0!		#DIV/0!	#DIV/0!	0	0	0
														#DIV/0!		#DIV/0!	#DIV/0!	0	0	0
														#DIV/0!		#DIV/0!	#DIV/0!	0	0	0
														#DIV/0!		#DIV/0!	#DIV/0!	0	0	0
														#DIV/0!		#DIV/0!	#DIV/0!	0	0	0
														#DIV/0!		#DIV/0!	#DIV/0!	0	0	0
														#DIV/0!		#DIV/0!	#DIV/0!	0	0	0
														#DIV/0!		#DIV/0!	#DIV/0!	0	0	0
														#DIV/0!		#DIV/0!	#DIV/0!	0	0	0
														#DIV/0!		#DIV/0!	#DIV/0!	0	0	0
														#DIV/0!		#DIV/0!	#DIV/0!	0	0	0
														#DIV/0!		#DIV/0!	#DIV/0!	0	0	0
														#DIV/0!		#DIV/0!	#DIV/0!	0	0	0
														#DIV/0!		#DIV/0!	#DIV/0!	0	0	0
														#DIV/0!		#DIV/0!	#DIV/0!	0	0	0
														#DIV/0!		#DIV/0!	#DIV/0!	0	0	0
														#DIV/0!		#DIV/0!	#DIV/0!	0	0	0
														#DIV/0!		#DIV/0!	#DIV/0!	0	0	0
														#DIV/0!		#DIV/0!	#DIV/0!	0	0	0
														#DIV/0!		#DIV/0!	#DIV/0!	0	0	0
														#DIV/0!		#DIV/0!	#DIV/0!	0	0	0
														#DIV/0!		#DIV/0!	#DIV/0!	0	0	0
														#DIV/0!		#DIV/0!	#DIV/0!	0	0	0
														#DIV/0!		#DIV/0!	#DIV/0!	0	0	0
														#DIV/0!		#DIV/0!	#DIV/0!	0	0	0
														#DIV/0!		#DIV/0!	#DIV/0!	0	0	0
														#DIV/0!		#DIV/0!	#DIV/0!	0	0	0
														#DIV/0!		#DIV/0!	#DIV/0!	0	0	0
														#DIV/0!		#DIV/0!	#DIV/0!	0	0	0
														#DIV/0!		#DIV/0!	#DIV/0!	0	0	0
														#DIV/0!		#DIV/0!	#DIV/0!	0	0	0
														#DIV/0!		#DIV/0!	#DIV/0!	0	0	0
														#DIV/0!		#DIV/0!	#DIV/0!	0	0	0
														#DIV/0!		#DIV/0!	#DIV/0!	0	0	0
														#DIV/0!		#DIV/0!	#DIV/0!	0	0	0
														#DIV/0!		#DIV/0!	#DIV/0!	0	0	0
														#DIV/0!		#DIV/0!	#DIV/0!	0	0	0
														#DIV/0!		#DIV/0!	#DIV/0!	0	0	0
														#DIV/0!		#DIV/0!	#DIV/0!	0	0	0
														#DIV/0!			#DIV/0!	0	0	0
														#DIV/0!			#DIV/0!	0	0	0
														#DIV/0!			#DIV/0!	0	0	0
														#DIV/0!			#DIV/0!	0	0	0
														#DIV/0!			#DIV/0!	0	0	0
														#DIV/0!			#DIV/0!	0	0	0
														#DIV/0!			#DIV/0!	0	0	0
														#DIV/0!			#DIV/0!	0	0	0
														#DIV/0!			#DIV/0!	0	0	0
														#DIV/0!			#DIV/0!	0	0	0
														#DIV/0!			#DIV/0!	0	0	0
														#DIV/0!			#DIV/0!	0	0	0
														#DIV/0!			#DIV/0!	0	0	0
														#DIV/0!			#DIV/0!	0	0	0
														#DIV/0!			#DIV/0!	0	0	0
														#DIV/0!			#DIV/0!	0	0	0
														#DIV/0!			#DIV/0!	0	0	0
														#DIV/0!			#DIV/0!	0	0	0
														#DIV/0!			#DIV/0!	0	0	0
														#DIV/0!			#DIV/0!	0	0	0
														#DIV/0!			#DIV/0!	0	0	0
														#DIV/0!			#DIV/0!	0	0	0
														#DIV/0!			#DIV/0!	0	0	0
														#DIV/0!			#DIV/0!	0	0	0
														#DIV/0!			#DIV/0!	0	0	0
														#DIV/0!			#DIV/0!	0	0	0
														#DIV/0!			#DIV/0!	0	0	0
														#DIV/0!			#DIV/0!	0	0	0
														#DIV/0!				0	0	0
														#DIV/0!				0	0	0
														#DIV/0!				0	0	0
														#DIV/0!				0	0	0
														#DIV/0!				0	0	0
														#DIV/0!				0	0	0
														#DIV/0!				0	0	0
														#DIV/0!				0	0	0
														#DIV/0!				0	0	0
														#DIV/0!				0	0	0
														#DIV/0!				0	0	0
														#DIV/0!				0	0	0
														#DIV/0!				0	0	0
																		0	0	0
																		0	0	0
																		0	0	0
																		0	0	0
																		0	0	0
																		0	0	0
																		0	0	0
																		0	0	0
																		0	0	0
																		0	0	0
																		0	0	0
																		0	0	0
																		0	0	0
																		0	0	0
																		0	0	0
																		0	0	0
																		0	0	0
																		0	0	0
																		0	0	0
																		0	0	0
																		0	0	0
																		0	0	0
																		0	0	0
																		0	0	0
																		0	0	0
																		0	0	0
																		0	0	0
																		0	0	0
																		0	0	0
																		0	0	0
																		0	0	0
[truncated: 89 more columns]

## Sheet: Fig 4G
	Metabolite	VGATiCre infected sample 1	VGATiCre infected sample 2	VGATiCre infected sample 3	VGATiCre infected sample 4	uninfected sample 1	uninfected sample 2	uninfected sample 3	uninfected sample 4	average uninfected	average VGATiCre infected	fold change	log2 fold change	ttest pValue	stdev infected	stdev uninfected	stdev ratio	SEM log2 fold change	count infected	count uninfected	minimum
131	1-Methylnicotinamide	22671.5	22671.5	22671.5	22671.5	22671.5	22671.5	22671.5	22671.5	22671.5	22671.5	1	0	#DIV/0!	0	0	0	0	4	4	4
74	2,3-Diphosphoglyceric acid	10000	10000	10000	10000	10000	10000	10000	10000	10000	10000	1	0	#DIV/0!	0	0	0	0	4	4	4
88	3-Hydroxybutyric acid	52813	52813	52813	52813	52813	52813	52813	52813	52813	52813	1	0	#DIV/0!	0	0	0	0	4	4	4
72	3-Phosphoglyceric acid	10561	10561	10561	10561	10561	10561	10561	10561	10561	10561	1	0	#DIV/0!	0	0	0	0	4	4	4
6	4-Hydroxyproline	46756.5	46756.5	46756.5	46756.5	46756.5	46756.5	46756.5	46756.5	46756.5	46756.5	1	0	#DIV/0!	0	0	0	0	4	4	4
104	4,5-Dihydroorotic acid	12723	12723	12723	12723	12723	12723	12723	12723	12723	12723	1	0	#DIV/0!	0	0	0	0	4	4	4
94	5-Phosphoribosylamine	10000	10000	10000	10000	10000	10000	10000	10000	10000	10000	1	0	#DIV/0!	0	0	0	0	4	4	4
42	5'-Methylthioadenosine	10000	10000	10000	10000	10000	10000	10000	10000	10000	10000	1	0	#DIV/0!	0	0	0	0	4	4	4
115	6-Phosphogluconic acid	10913.5	10913.5	10913.5	10913.5	10913.5	10913.5	10913.5	10913.5	10913.5	10913.5	1	0	#DIV/0!	0	0	0	0	4	4	4
81	Acetoacetic acid	50547.5	50547.5	50547.5	50547.5	50547.5	50547.5	50547.5	50547.5	50547.5	50547.5	1	0	#DIV/0!	0	0	0	0	4	4	4
60	Acetyl-CoA	10000	10000	10000	10000	10000	10000	10000	10000	10000	10000	1	0	#DIV/0!	0	0	0	0	4	4	4
										#DIV/0!	#DIV/0!	#DIV/0!	#DIV/0!	#DIV/0!	#DIV/0!	#DIV/0!	#DIV/0!	#DIV/0!
109	Acetylcysteine	10664.5	10664.5	10664.5	10664.5	10664.5	10664.5	10664.5	10664.5	10664.5	10664.5	1	0	#DIV/0!	0	0	0	0	4	4	4
102	Adenine	25113142	19994030	19817100	16463121	19337864	23351738	25185098	16940620	21203830	2.03468e+07	0.959584	-0.0595195	0.751732	3.56866e+06	3.74703e+06	0.238916	0.1796	4	4	4
27	Adenosine	25177438	21603244	19318362	23849026	20071580	25995368	29965112	20220430	2.40631e+07	2.2487e+07	0.934501	-0.0977315	0.584194	2.57649e+06	4.80506e+06	0.215143	0.16607	4	4	4
49	Adenosine diphosphate ribose	10000	10000	10000	10000	10000	10000	10000	10000	10000	10000	1	0	#DIV/0!	0	0	0	0	4	4	4
30	Adenosine monophosphate	56752.5	161310	56752.5	124850	321156	2140388	162295	725784	837406	99916.2	0.119316	-3.06714	0.153104	52016.4	900465	0.142547	0.861791	4	4	4
35	Adenosine triphosphate	14632	14632	14632	14632	14632	14632	14632	14632	14632	14632	1	0	#DIV/0!	0	0	0	0	4	4	4
46	Adenylsuccinic acid	10000	10000	10000	10000	10000	10000	10000	10000	10000	10000	1	0	#DIV/0!	0	0	0	0	4	4	4
32	ADP	10000	10000	10000	10000	10000	10000	10000	10000	10000	10000	1	0	#DIV/0!	0	0	0	0	4	4	4
										#DIV/0!	#DIV/0!	#DIV/0!	#DIV/0!	#DIV/0!	#DIV/0!	#DIV/0!	#DIV/0!	#DIV/0!
80	Allantoin	16535.5	16535.5	16535.5	16535.5	16535.5	16535.5	16535.5	16535.5	16535.5	16535.5	1	0	#DIV/0!	0	0	0	0	4	4	4
111	Aminoadipic acid	119811	119811	119811	119811	119811	119811	119811	119811	119811	119811	1	0	#DIV/0!	0	0	0	0	4	4	4
38	Argininosuccinic acid	10000	10000	10000	10000	10000	10000	10000	10000	10000	10000	1	0	#DIV/0!	0	0	0	0	4	4	4
0	Beta-Alanine	74727.5	74727.5	74727.5	74727.5	74727.5	74727.5	74727.5	74727.5	74727.5	74727.5	1	0	#DIV/0!	0	0	0	0	4	4	4
3	Betaine	430438	430438	430438	430438	430438	430438	430438	430438	430438	430438	1	0	#DIV/0!	0	0	0	0	4	4	4
44	Butyrylcarnitine	66822	66822	66822	66822	66822	66822	66822	66822	66822	66822	1	0	#DIV/0!	0	0	0	0	4	4	4
146	Carbamoyl phosphate	19220.5	19220.5	19220.5	19220.5	19220.5	19220.5	19220.5	19220.5	19220.5	19220.5	1	0	#DIV/0!	0	0	0	0	4	4	4
140	Carnosine	10000	10000	10000	10000	10000	10000	10000	10000	10000	10000	1	0	#DIV/0!	0	0	0	0	4	4	4
142	CDP	10000	10000	10000	10000	10000	10000	10000	10000	10000	10000	1	0	#DIV/0!	0	0	0	0	4	4	4
96	Choline	17168	17168	17168	17168	17168	17168	17168	17168	17168	17168	1	0	#DIV/0!	0	0	0	0	4	4	4
120	cis-Aconitic acid	16876.5	16876.5	16876.5	16876.5	16876.5	16876.5	16876.5	16876.5	16876.5	16876.5	1	0	#DIV/0!	0	0	0	0	4	4	4
122	Citric acid	39276.5	39276.5	39276.5	39276.5	39276.5	39276.5	39276.5	39276.5	39276.5	39276.5	1	0	#DIV/0!	0	0	0	0	4	4	4
114	Citrulline	139982	139982	139982	139982	139982	139982	139982	139982	139982	139982	1	0	#DIV/0!	0	0	0	0	4	4	4
17	Creatine	2730520	3064313	3295510	5284690	2177376	4289408	5320832	3160011	3.73691e+06	3.59376e+06	0.961693	-0.0563512	0.877799	1.1509e+06	1.3637e+06	0.466923	0.35023	4	4	4
84	Creatinine	240010	247895	240010	240010	240010	240010	240010	319290	259830	241981	0.931306	-0.102673	0.404708	3942.75	39640.2	0.14289	0.110676	4	4	4
23	Cyclic AMP	21390	14654	18554	13405	20108	25635	21200	14300	20310.8	17000.8	0.837032	-0.256645	0.306822	3656.72	4665.78	0.263413	0.227008	4	4	4
137	Cytidine	21829.5	21829.5	21829.5	21829.5	21829.5	21829.5	21829.5	21829.5	21829.5	21829.5	1	0	#DIV/0!	0	0	0	0	4	4	4
139	Cytidine monophosphate	10000	10000	10000	10000	10000	10000	10000	10000	10000	10000	1	0	#DIV/0!	0	0	0	0	4	4	4
143	Cytidine triphosphate	10000	10000	10000	10000	10000	10000	10000	10000	10000	10000	1	0	#DIV/0!	0	0	0	0	4	4	4
79	Cytosine	23923	23923	23923	23923	23923	23923	23923	23923	23923	23923	1	0	#DIV/0!	0	0	0	0	4	4	4
107	D-2-Hydroxyglutaric acid	78639.5	78639.5	78639.5	78639.5	78639.5	78639.5	78639.5	78639.5	78639.5	78639.5	1	0	#DIV/0!	0	0	0	0	4	4	4
113	D-Glucose	22310	22310	22310	22310	22310	22310	22310	22310	22310	22310	1	0	#DIV/0!	0	0	0	0	4	4	4
10	D-Glyceraldehyde 3-phosphate	10000	10000	10000	10000	10000	10000	10000	10000	10000	10000	1	0	#DIV/0!	0	0	0	0	4	4	4
12	D-Ribose 5-phosphate	10000	10000	10000	10000	10000	10000	10000	10000	10000	10000	1	0	#DIV/0!	0	0	0	0	4	4	4
130	D-Sedoheptulose 7-phosphate	10539	10539	10539	10539	10539	10539	10539	10539	10539	10539	1	0	#DIV/0!	0	0	0	0	4	4	4
54	Dihydrofolic acid	18084	18084	18084	18084	18084	18084	18084	18084	18084	18084	1	0	#DIV/0!	0	0	0	0	4	4	4
9	Dihydroxyacetone phosphate	10000	10000	10000	10000	10000	10000	10000	10000	10000	10000	1	0	#DIV/0!	0	0	0	0	4	4	4
34	dTDP	10000	10000	10000	10000	10000	10000	10000	10000	10000	10000	1	0	#DIV/0!	0	0	0	0	4	4	4
										#DIV/0!	#DIV/0!	#DIV/0!	#DIV/0!	#DIV/0!	#DIV/0!	#DIV/0!	#DIV/0!	#DIV/0!
61	FAD	10000	10000	10000	10000	10000	10000	10000	10000	10000	10000	1	0	#DIV/0!	0	0	0	0	4	4	4
53	Folic acid	14777	14777	14777	14777	14777	14777	14777	14777	14777	14777	1	0	#DIV/0!	0	0	0	0	4	4	4
116	Fructose 1,6-bisphosphate	10000	10000	10000	10000	10000	10000	10000	10000	10000	10000	1	0	#DIV/0!	0	0	0	0	4	4	4
13	Fructose 6-phosphate	10000	10000	10000	10000	10000	10000	10000	10000	10000	10000	1	0	#DIV/0!	0	0	0	0	4	4	4
78	Fumaric acid	32909.5	32909.5	32909.5	32909.5	32909.5	32909.5	32909.5	32909.5	32909.5	32909.5	1	0	#DIV/0!	0	0	0	0	4	4	4
147	GABA	4162906	9403039	9590613	10098645	1911021	1911021	1911021	1911021	1911021	8.3138e+06	4.35045	2.12116	0.00368564	2.78282e+06	0	1.4562	0.241452	4	4	4
148	GABA-13C-4	9043929	11609526	8233287	9015515	9917050	10898243	10215846	9451392	1.01206e+07	9.47556e+06	0.936262	-0.0950157	0.448507	1.47139e+06	606375	0.155832	0.120062	4	4	4
14	Glucose 6-phosphate	10000	10000	10000	10000	10000	10000	10000	10000	10000	10000	1	0	#DIV/0!	0	0	0	0	4	4	4
37	Glutathione	11742	11742	11742	11742	11742	11742	11742	11742	11742	11742	1	0	#DIV/0!	0	0	0	0	4	4	4
75	Glycerol 3-phosphate	10000	10000	10000	10000	10000	10000	10000	10000	10000	10000	1	0	#DIV/0!	0	0	0	0	4	4	4
62	Glycine	80703.5	80703.5	80703.5	80703.5	80703.5	80703.5	80703.5	80703.5	80703.5	80703.5	1	0	#DIV/0!	0	0	0	0	4	4	4
69	Guanidoacetic acid	23940	23940	23940	23940	23940	23940	23940	23940	23940	23940	1	0	#DIV/0!	0	0	0	0	4	4	4
103	Guanine	24632.5	24632.5	24632.5	24632.5	24632.5	24632.5	24632.5	24632.5	24632.5	24632.5	1	0	#DIV/0!	0	0	0	0	4	4	4
28	Guanosine	14204	14204	14204	14204	14204	14204	14204	14204	14204	14204	1	0	#DIV/0!	0	0	0	0	4	4	4
33	Guanosine diphosphate	10000	10000	10000	10000	10000	10000	10000	10000	10000	10000	1	0	#DIV/0!	0	0	0	0	4	4	4
31	Guanosine monophosphate	10592	10592	10592	10592	10592	10592	10592	10592	10592	10592	1	0	#DIV/0!	0	0	0	0	4	4	4
36	Guanosine triphosphate	10000	10000	10000	10000	10000	10000	10000	10000	10000	10000	1	0	#DIV/0!	0	0	0	0	4	4	4
89	Homocysteine	10000	10000	10000	10000	10000	10000	10000	10000	10000	10000	1	0	#DIV/0!	0	0	0	0	4	4	4
63	Hypotaurine	10000	10000	10000	10000	10000	10000	10000	10000	10000	10000	1	0	#DIV/0!	0	0	0	0	4	4	4
99	Hypoxanthine	1162959	918918	750841	707771	817533	862751	1057956	712278	862630	885122	1.02607	0.0371357	0.86423	206414	144674	0.294738	0.207206	4	4	4
21	Inosine	54813	43610	37902	38718	47342	41715	55210	37365	45408	43760.8	0.963723	-0.053309	0.773781	7787.37	7706.01	0.236981	0.17738	4	4	4
25	Inosinic acid	12205	12205	12205	12205	12205	12205	12205	12205	12205	12205	1	0	#DIV/0!	0	0	0	0	4	4	4
144	L-Acetylcarnitine	216789	216789	216789	216789	216789	216789	216789	216789	216789	216789	1	0	#DIV/0!	0	0	0	0	4	4	4
1	L-Alanine	396468	396468	396468	396468	396468	396468	396468	396468	396468	396468	1	0	#DIV/0!	0	0	0	0	4	4	4
19	L-Arginine	59111.5	59111.5	59111.5	59111.5	59111.5	59111.5	59111.5	59111.5	59111.5	59111.5	1	0	#DIV/0!	0	0	0	0	4	4	4
86	L-Asparagine	21885.5	21885.5	21885.5	21885.5	21885.5	21885.5	21885.5	21885.5	21885.5	21885.5	1	0	#DIV/0!	0	0	0	0	4	4	4
85	L-Aspartic acid	28418	29092	28418	28418	28418	28418	28418	28418	28418	28586.5	1.00593	0.00852897	0.355918	337	0	0.0118587	0.00850381	4	4	4
129	L-Carnitine	35496.5	35496.5	35496.5	35496.5	35496.5	35496.5	35496.5	40784	36818.4	35496.5	0.964097	-0.0527492	0.355918	0	2643.75	0.0692272	0.0517965	4	4	4
128	L-Cystathionine	10918	10918	10918	10918	10918	10918	10918	10918	10918	10918	1	0	#DIV/0!	0	0	0	0	4	4	4
70	L-Cysteine	10000	10000	10000	10000	10000	10000	10000	10000	10000	10000	1	0	#DIV/0!	0	0	0	0	4	4	4
112	L-Cystine	10578.5	10578.5	10578.5	10578.5	10578.5	10578.5	10578.5	10578.5	10578.5	10578.5	1	0	#DIV/0!	0	0	0	0	4	4	4
16	L-Glutamic acid	274952	1081938	701786	1050227	577475	1030637	1103452	917201	907191	777226	0.856739	-0.223073	0.578503	376541	232788	0.469688	0.395463	4	4	4
91	L-Glutamine	395516	664711	589484	1082588	370296	849615	1010841	677580	727083	683075	0.939473	-0.0900766	0.832565	289481	274032	0.532811	0.409104	4	4	4
123	L-Histidine	56702	56702	56702	56702	56702	56702	56702	56702	56702	56702	1	0	#DIV/0!	0	0	0	0	4	4	4
7	L-Isoleucine	316566	348922	316566	316566	316566	316566	316566	316566	316566	324655	1.02555	0.0364005	0.355918	16177.8	0	0.0511038	0.0359451	4	4	4
20	L-Kynurenine	10956	10956	10956	10956	10956	10956	10956	10956	10956	10956	1	0	#DIV/0!	0	0	0	0	4	4	4
68	L-Lactic acid	4493026	4493026	4493026	4493026	4493026	4493026	4493026	4493026	4493026	4493026	1	0	#DIV/0!	0	0	0	0	4	4	4
8	L-Leucine	289908	345799	289908	289908	289908	289908	289908	289908	289908	303881	1.0482	0.0679094	0.355918	27945.2	0	0.0963933	0.0663359	4	4	4
18	L-Lysine	15163.5	15163.5	15163.5	15163.5	15163.5	15163.5	15163.5	15163.5	15163.5	15163.5	1	0	#DIV/0!	0	0	0	0	4	4	4
83	L-Malic acid	149686	149686	149686	149686	149686	149686	149686	149686	149686	149686	1	0	#DIV/0!	0	0	0	0	4	4	4
92	L-Methionine	18507.5	36598	18507.5	18507.5	18507.5	18507.5	18507.5	18507.5	18507.5	23030.1	1.24437	0.315412	0.355918	9045.25	0	0.488734	0.283315	4	4	4
133	L-Phenylalanine	68625	155837	68625	68625	68625	68625	68625	68625	68625	90428	1.31771	0.398035	0.355918	43606	0	0.635424	0.347847	4	4	4
108	L-Proline	1468213	1468213	1468213	1468213	1468213	1468213	1468213	1468213	1468213	1468213	1	0	#DIV/0!	0	0	0	0	4	4	4
71	L-Serine	103269	222267	103269	103269	103269	103269	103269	103269	103269	133018	1.28808	0.36522	0.355918	59499	0	0.576155	0.322658	4	4	4
90	L-Threonine	35875	35875	35875	35875	35875	35875	35875	35875	35875	35875	1	0	#DIV/0!	0	0	0	0	4	4	4
40	L-Tryptophan	18915.5	18915.5	18915.5	18915.5	18915.5	18915.5	18915.5	18915.5	18915.5	18915.5	1	0	#DIV/0!	0	0	0	0	4	4	4
134	L-Tyrosine	38964	82693	38964	38964	38964	38964	38964	38964	38964	49896.2	1.28057	0.35679	0.355918	21864.5	0	0.561146	0.316094	4	4	4
4	L-Valine	393342	401838	393342	393342	393342	393342	393342	393342	393342	395466	1.0054	0.00776942	0.355918	4248	0	0.0107998	0.00774854	4	4	4
5	N-Acetyl-L-alanine	92659	62994	71074	62994	62994	66112	79379	66414	68724.8	72430.2	1.05392	0.0757626	0.655323	14013.4	7269.13	0.232388	0.159057	4	4	4
126	N-Acetyl-L-methionine	10000	10000	10000	10000	10000	10000	10000	10000	10000	10000	1	0	#DIV/0!	0	0	0	0	4	4	4
41	N-Acetyl-L-phenylalanine	62127.5	62127.5	62127.5	62127.5	62127.5	62127.5	62127.5	62127.5	62127.5	62127.5	1	0	#DIV/0!	0	0	0	0	4	4	4
124	N-Acetylglutamic acid	15851	15851	15851	15851	15851	15851	15851	15851	15851	15851	1	0	#DIV/0!	0	0	0	0	4	4	4
125	N-Acetylglutamine	21826.5	21826.5	21826.5	21826.5	21826.5	21826.5	21826.5	21885	21841.1	21826.5	0.99933	-0.000966364	0.355918	0	29.25	0.00133832	0.000966041	4	4	4
127	N-Acetylornithine	17875	17875	17875	17875	17875	17875	17875	17875	17875	17875	1	0	#DIV/0!	0	0	0	0	4	4	4
15	N-Acetylserine	27360.5	27360.5	27360.5	27360.5	27360.5	27360.5	27360.5	27360.5	27360.5	27360.5	1	0	#DIV/0!	0	0	0	0	4	4	4
132	N6-Acetyl-L-lysine	152113	152113	152113	152113	152113	152113	152113	152113	152113	152113	1	0	#DIV/0!	0	0	0	0	4	4	4
56	NAD	10000	10000	10000	10000	10000	10000	10000	10000	10000	10000	1	0	#DIV/0!	0	0	0	0	4	4	4
58	NADH	10000	10000	10000	10000	10000	10000	10000	10000	10000	10000	1	0	#DIV/0!	0	0	0	0	4	4	4
57	NADP	10000	10000	10000	10000	10000	10000	10000	10000	10000	10000	1	0	#DIV/0!	0	0	0	0	4	4	4
59	NADPH	10571	10571	10571	10571	10571	10571	10571	10571	10571	10571	1	0	#DIV/0!	0	0	0	0	4	4	4
118	Niacinamide	2.94693e+06	2.94693e+06	2.94693e+06	2.94693e+06	2.94693e+06	2.94693e+06	2.94693e+06	2.94693e+06	2.94693e+06	2.94693e+06	1	0	#DIV/0!	0	0	0	0	4	4	4
117	Nicotinic acid	35934	35934	35934	35934	35934	35934	35934	35934	35934	35934	1	0	#DIV/0!	0	0	0	0	4	4	4
65	O-Phosphoethanolamine	11013.5	11013.5	11013.5	11013.5	11013.5	11013.5	11013.5	11013.5	11013.5	11013.5	1	0	#DIV/0!	0	0	0	0	4	4	4
93	Ornithine	23980	23980	23980	23980	23980	23980	23980	23980	23980	23980	1	0	#DIV/0!	0	0	0	0	4	4	4
98	Orotic acid	10401.5	10401.5	10401.5	10401.5	10401.5	10401.5	10401.5	10401.5	10401.5	10401.5	1	0	#DIV/0!	0	0	0	0	4	4	4
24	Orotidylic acid	10000	10000	10000	10000	10000	10000	10000	10000	10000	10000	1	0	#DIV/0!	0	0	0	0	4	4	4
55	Oxidized glutathione	10929	10929	10929	10929	10929	10929	10929	10929	10929	10929	1	0	#DIV/0!	0	0	0	0	4	4	4
121	Oxoadipic acid	20224.5	20224.5	20224.5	20224.5	20224.5	20224.5	20224.5	20224.5	20224.5	20224.5	1	0	#DIV/0!	0	0	0	0	4	4	4
105	Oxoglutaric acid	27714	27714	27714	27714	27714	27714	27714	27714	27714	27714	1	0	#DIV/0!	0	0	0	0	4	4	4
51	Palmitic acid	58058001	66221708	64260160	70931976	58058001	81948776	78277736	68168320	7.16132e+07	6.4868e+07	0.90581	-0.14272	0.303982	5.33385e+06	1.07525e+07	0.155064	0.123486	4	4	4
145	Pantothenic acid	242450	242450	242450	242450	242450	242450	242450	242450	242450	242450	1	0	#DIV/0!	0	0	0	0	4	4	4
119	Phenol	17215.5	17215.5	17215.5	17215.5	17215.5	17215.5	17215.5	17215.5	17215.5	17215.5	1	0	#DIV/0!	0	0	0	0	4	4	4
76	Phosphocreatine	10000	10000	10000	10000	10000	10000	10000	10000	10000	10000	1	0	#DIV/0!	0	0	0	0	4	4	4
67	Phosphoenolpyruvic acid	10000	10000	10000	10000	10000	10000	10000	10000	10000	10000	1	0	#DIV/0!	0	0	0	0	4	4	4
95	Phosphoribosyl pyrophosphate	10000	10000	10000	10000	10000	10000	10000	10000	10000	10000	1	0	#DIV/0!	0	0	0	0	4	4	4
97	Phosphorylcholine	17123	17123	17123	17123	17123	17123	17123	17123	17123	17123	1	0	#DIV/0!	0	0	0	0	4	4	4
73	Phosphoserine	10000	10000	10000	10000	10000	10000	10000	10000	10000	10000	1	0	#DIV/0!	0	0	0	0	4	4	4
110	Pipecolic acid	162495	162495	162495	162495	162495	162495	162495	162495	162495	162495	1	0	#DIV/0!	0	0	0	0	4	4	4
39	Propionylcarnitine	102430	102430	102430	102430	102430	102430	102430	102430	102430	102430	1	0	#DIV/0!	0	0	0	0	4	4	4
66	Pyruvic acid	300868	334643	231715	231651	230022	316325	263614	236499	261615	274719	1.05009	0.0705127	0.699991	51571.5	39268.8	0.252395	0.17338	4	4	4
11	Ribose 1-phosphate	10000	10000	10000	10000	10000	10000	10000	10000	10000	10000	1	0	#DIV/0!	0	0	0	0	4	4	4
47	S-Adenosylhomocysteine	10000	10000	10000	10000	10000	10000	10000	10000	10000	10000	1	0	#DIV/0!	0	0	0	0	4	4	4
48	S-Adenosylmethionine	10000	10000	10000	10000	10000	10000	10000	10000	10000	10000	1	0	#DIV/0!	0	0	0	0	4	4	4
43	Saccharopine	10481	10481	10481	10481	10481	10481	10481	10481	10481	10481	1	0	#DIV/0!	0	0	0	0	4	4	4
2	Sarcosine	149614	149614	149614	149614	149614	149614	149614	149614	149614	149614	1	0	#DIV/0!	0	0	0	#DIV/0!
										#DIV/0!	#DIV/0!	#DIV/0!	#DIV/0!	#DIV/0!	#DIV/0!	#DIV/0!	#DIV/0!	#DIV/0!	0	0	0
82	Succinic acid	216312	216312	216312	216312	216312	216312	216312	216312	216312	216312	1	0	#DIV/0!	0	0	0	0	4	4	4
64	Taurine	87337	138894	158302	223045	55881	138670	150207	80201	106240	151894	1.42973	0.515746	0.252896	56095.6	45456.4	0.808092	0.407709	4	4	4
29	Thymidine	10000	10000	10000	10000	10000	10000	10000	10000	10000	10000	1	0	#DIV/0!	0	0	0	0	4	4	4
77	Uracil	15380.5	15380.5	15380.5	15380.5	15380.5	15380.5	15380.5	15380.5	15380.5	15380.5	1	0	#DIV/0!	0	0	0	0	4	4	4
87	Ureidopropionic acid	12894	12894	12894	12894	12894	12894	12894	12894	12894	12894	1	0	#DIV/0!	0	0	0	0	4	4	4
106	Ureidosuccinic acid	10000	10000	10000	10000	10000	10000	10000	10000	10000	10000	1	0	#DIV/0!	0	0	0	0	4	4	4
101	Uric acid	10758.5	10758.5	10758.5	10758.5	10758.5	10758.5	10758.5	10758.5	10758.5	10758.5	1	0	#DIV/0!	0	0	0	0	4	4	4
135	Uridine	10550	10550	10550	10550	10550	10550	10550	10550	10550	10550	1	0	#DIV/0!	0	0	0	0	4	4	4
138	Uridine 5'-diphosphate	10845	10845	10845	10845	10845	10845	10845	10845	10845	10845	1	0	#DIV/0!	0	0	0	0	4	4	4
136	Uridine 5'-monophosphate	10483.5	10483.5	10483.5	10483.5	10483.5	10483.5	10483.5	10483.5	10483.5	10483.5	1	0	#DIV/0!	0	0	0	0	4	4	4
50	Uridine diphosphate glucose	10000	10000	10000	10000	10000	10000	10000	10000	10000	10000	1	0	#DIV/0!	0	0	0	0	4	4	4
52	Uridine diphosphate-N-acetylglucosamine	10668	10668	10668	10668	10668	10668	10668	10668	10668	10668	1	0	#DIV/0!	0	0	0	0	4	4	4
141	Uridine triphosphate	10000	10000	10000	10000	10000	10000	10000	10000	10000	10000	1	0	#DIV/0!	0	0	0	0	4	4	4
45	Valerylcarnitine	35687	35687	35687	35687	35687	35687	35687	35687	35687	35687	1	0	#DIV/0!	0	0	0	0	4	4	4
100	Xanthine	16431.5	16431.5	16431.5	16431.5	16431.5	16431.5	16431.5	16431.5	16431.5	16431.5	1	0	#DIV/0!	0	0	0	0	4	4	4
22	Xanthosine	10000	10000	10000	10000	10000	10000	10000	10000	10000	10000	1	0	#DIV/0!	0	0	0	0	4	4	4
26	Xanthylic acid	10000	10000	10000	10000	10000	10000	10000	10000	10000	10000	1	0	#DIV/0!	0	0	0	0	4	4	4
															#DIV/0!		#DIV/0!	#DIV/0!	0	0	0
															#DIV/0!		#DIV/0!	#DIV/0!	0	0	0
															#DIV/0!		#DIV/0!	#DIV/0!	0	0	0
															#DIV/0!		#DIV/0!	#DIV/0!	0	0	0
															#DIV/0!		#DIV/0!	#DIV/0!	0	0	0
															#DIV/0!		#DIV/0!	#DIV/0!	0	0	0
															#DIV/0!		#DIV/0!	#DIV/0!	0	0	0
															#DIV/0!		#DIV/0!	#DIV/0!	0	0	0
															#DIV/0!		#DIV/0!	#DIV/0!	0	0	0
															#DIV/0!		#DIV/0!	#DIV/0!	0	0	0
															#DIV/0!		#DIV/0!	#DIV/0!	0	0	0
															#DIV/0!		#DIV/0!	#DIV/0!	0	0	0
															#DIV/0!		#DIV/0!	#DIV/0!	0	0	0
															#DIV/0!		#DIV/0!	#DIV/0!	0	0	0
															#DIV/0!		#DIV/0!	#DIV/0!	0	0	0
															#DIV/0!		#DIV/0!	#DIV/0!	0	0	0
															#DIV/0!		#DIV/0!	#DIV/0!	0	0	0
															#DIV/0!		#DIV/0!	#DIV/0!	0	0	0
															#DIV/0!		#DIV/0!	#DIV/0!	0	0	0
															#DIV/0!		#DIV/0!	#DIV/0!	0	0	0
															#DIV/0!		#DIV/0!	#DIV/0!	0	0	0
															#DIV/0!		#DIV/0!	#DIV/0!	0	0	0
															#DIV/0!		#DIV/0!	#DIV/0!	0	0	0
															#DIV/0!		#DIV/0!	#DIV/0!	0	0	0
															#DIV/0!		#DIV/0!	#DIV/0!	0	0	0
															#DIV/0!		#DIV/0!	#DIV/0!	0	0	0
															#DIV/0!		#DIV/0!	#DIV/0!	0	0	0
															#DIV/0!		#DIV/0!	#DIV/0!	0	0	0
															#DIV/0!		#DIV/0!	#DIV/0!	0	0	0
															#DIV/0!		#DIV/0!	#DIV/0!	0	0	0
															#DIV/0!		#DIV/0!	#DIV/0!	0	0	0
															#DIV/0!		#DIV/0!	#DIV/0!	0	0	0
															#DIV/0!		#DIV/0!	#DIV/0!	0	0	0
															#DIV/0!		#DIV/0!	#DIV/0!	0	0	0
															#DIV/0!		#DIV/0!	#DIV/0!	0	0	0
															#DIV/0!		#DIV/0!	#DIV/0!	0	0	0
															#DIV/0!		#DIV/0!	#DIV/0!	0	0	0
															#DIV/0!		#DIV/0!	#DIV/0!	0	0	0
															#DIV/0!		#DIV/0!	#DIV/0!	0	0	0
															#DIV/0!		#DIV/0!	#DIV/0!	0	0	0
															#DIV/0!		#DIV/0!	#DIV/0!	0	0	0
															#DIV/0!		#DIV/0!	#DIV/0!	0	0	0
															#DIV/0!		#DIV/0!	#DIV/0!	0	0	0
															#DIV/0!		#DIV/0!	#DIV/0!	0	0	0
															#DIV/0!		#DIV/0!	#DIV/0!	0	0	0
															#DIV/0!		#DIV/0!	#DIV/0!	0	0	0
															#DIV/0!		#DIV/0!	#DIV/0!	0	0	0
															#DIV/0!		#DIV/0!	#DIV/0!	0	0	0
															#DIV/0!		#DIV/0!	#DIV/0!	0	0	0
															#DIV/0!		#DIV/0!	#DIV/0!	0	0	0
															#DIV/0!		#DIV/0!	#DIV/0!	0	0	0
															#DIV/0!		#DIV/0!	#DIV/0!	0	0	0
															#DIV/0!		#DIV/0!	#DIV/0!	0	0	0
															#DIV/0!		#DIV/0!	#DIV/0!	0	0	0
															#DIV/0!		#DIV/0!	#DIV/0!	0	0	0
															#DIV/0!		#DIV/0!	#DIV/0!	0	0	0
															#DIV/0!		#DIV/0!	#DIV/0!	0	0	0
															#DIV/0!		#DIV/0!	#DIV/0!	0	0	0
															#DIV/0!		#DIV/0!	#DIV/0!	0	0	0
															#DIV/0!		#DIV/0!	#DIV/0!	0	0	0
															#DIV/0!		#DIV/0!	#DIV/0!	0	0	0
															#DIV/0!		#DIV/0!	#DIV/0!	0	0	0
															#DIV/0!		#DIV/0!	#DIV/0!	0	0	0
															#DIV/0!		#DIV/0!	#DIV/0!	0	0	0
															#DIV/0!		#DIV/0!	#DIV/0!	0	0	0
															#DIV/0!		#DIV/0!	#DIV/0!	0	0	0
															#DIV/0!		#DIV/0!	#DIV/0!	0	0	0
															#DIV/0!		#DIV/0!	#DIV/0!	0	0	0
															#DIV/0!		#DIV/0!	#DIV/0!	0	0	0
															#DIV/0!		#DIV/0!	#DIV/0!	0	0	0
															#DIV/0!		#DIV/0!	#DIV/0!	0	0	0
															#DIV/0!		#DIV/0!	#DIV/0!	0	0	0
															#DIV/0!		#DIV/0!	#DIV/0!	0	0	0
															#DIV/0!		#DIV/0!	#DIV/0!	0	0	0
															#DIV/0!		#DIV/0!	#DIV/0!	0	0	0
															#DIV/0!		#DIV/0!	#DIV/0!	0	0	0
															#DIV/0!		#DIV/0!	#DIV/0!	0	0	0
															#DIV/0!		#DIV/0!	#DIV/0!	0	0	0
															#DIV/0!		#DIV/0!	#DIV/0!	0	0	0
															#DIV/0!		#DIV/0!	#DIV/0!	0	0	0
															#DIV/0!		#DIV/0!	#DIV/0!	0	0	0
															#DIV/0!		#DIV/0!	#DIV/0!	0	0	0
															#DIV/0!		#DIV/0!	#DIV/0!	0	0	0
															#DIV/0!		#DIV/0!	#DIV/0!	0	0	0
															#DIV/0!		#DIV/0!	#DIV/0!	0	0	0
															#DIV/0!		#DIV/0!	#DIV/0!	0	0	0
															#DIV/0!		#DIV/0!	#DIV/0!	0	0	0
															#DIV/0!		#DIV/0!	#DIV/0!	0	0	0
															#DIV/0!		#DIV/0!	#DIV/0!	0	0	0
															#DIV/0!		#DIV/0!	#DIV/0!	0	0	0
															#DIV/0!		#DIV/0!	#DIV/0!	0	0	0
															#DIV/0!		#DIV/0!	#DIV/0!	0	0	0
															#DIV/0!		#DIV/0!	#DIV/0!	0	0	0
															#DIV/0!		#DIV/0!	#DIV/0!	0	0	0
															#DIV/0!		#DIV/0!	#DIV/0!	0	0	0
															#DIV/0!		#DIV/0!	#DIV/0!	0	0	0
															#DIV/0!		#DIV/0!	#DIV/0!	0	0	0
															#DIV/0!		#DIV/0!	#DIV/0!	0	0	0
															#DIV/0!		#DIV/0!	#DIV/0!	0	0	0
															#DIV/0!		#DIV/0!	#DIV/0!	0	0	0
															#DIV/0!		#DIV/0!	#DIV/0!	0	0	0
															#DIV/0!		#DIV/0!	#DIV/0!	0	0	0
															#DIV/0!		#DIV/0!	#DIV/0!	0	0	0
															#DIV/0!		#DIV/0!	#DIV/0!	0	0	0
															#DIV/0!		#DIV/0!	#DIV/0!	0	0	0
															#DIV/0!		#DIV/0!	#DIV/0!	0	0	0
															#DIV/0!		#DIV/0!	#DIV/0!	0	0	0
															#DIV/0!		#DIV/0!	#DIV/0!	0	0	0
															#DIV/0!		#DIV/0!	#DIV/0!	0	0	0
															#DIV/0!			#DIV/0!	0	0	0
															#DIV/0!			#DIV/0!	0	0	0
															#DIV/0!			#DIV/0!	0	0	0
															#DIV/0!			#DIV/0!	0	0	0
															#DIV/0!			#DIV/0!	0	0	0
															#DIV/0!			#DIV/0!	0	0	0
															#DIV/0!			#DIV/0!	0	0	0
															#DIV/0!			#DIV/0!	0	0	0
															#DIV/0!			#DIV/0!	0	0	0
															#DIV/0!			#DIV/0!	0	0	0
															#DIV/0!			#DIV/0!	0	0	0
															#DIV/0!			#DIV/0!	0	0	0
															#DIV/0!			#DIV/0!	0	0	0
															#DIV/0!			#DIV/0!	0	0	0
															#DIV/0!			#DIV/0!	0	0	0
															#DIV/0!			#DIV/0!	0	0	0
															#DIV/0!			#DIV/0!	0	0	0
															#DIV/0!			#DIV/0!	0	0	0
															#DIV/0!			#DIV/0!	0	0	0
															#DIV/0!			#DIV/0!	0	0	0
															#DIV/0!			#DIV/0!	0	0	0
															#DIV/0!			#DIV/0!	0	0	0
															#DIV/0!			#DIV/0!	0	0	0
															#DIV/0!			#DIV/0!	0	0	0
															#DIV/0!			#DIV/0!	0	0	0
															#DIV/0!			#DIV/0!	0	0	0
															#DIV/0!			#DIV/0!	0	0	0
															#DIV/0!			#DIV/0!	0	0	0
															#DIV/0!				0	0	0
															#DIV/0!				0	0	0
															#DIV/0!				0	0	0
															#DIV/0!				0	0	0
															#DIV/0!				0	0	0
															#DIV/0!				0	0	0
															#DIV/0!				0	0	0
															#DIV/0!				0	0	0
															#DIV/0!				0	0	0
															#DIV/0!				0	0	0
															#DIV/0!				0	0	0
															#DIV/0!				0	0	0
															#DIV/0!				0	0	0
																			0	0	0
																			0	0	0
																			0	0	0
																			0	0	0
																			0	0	0
																			0	0	0
																			0	0	0
																			0	0	0
																			0	0	0
																			0	0	0
																			0	0	0
																			0	0	0
																			0	0	0
																			0	0	0
																			0	0	0
																			0	0	0
																			0	0	0
																			0	0	0
																			0	0	0
																			0	0	0
																			0	0	0
																			0	0	0
																			0	0	0
																			0	0	0
																			0	0	0
																			0	0	0
																			0	0	0
																			0	0	0
																			0	0	0
																			0	0	0
																			0	0	0

## Sheet: Fig S4H
Metabolite	uninfected sample 1	uninfected sample 2	uninfected sample 3	uninfected sample 4	infected Adora2aCre sample 1	infected Adora2aCre sample 2	infected Adora2aCre sample 3	infected Adora2aCre sample 4	average uninfected	average Adora2aCre infected	fold change	log2 fold change	ttest pvalue	stdev infected	stdev uninfected	stdev ratio	SEM log2 fold change	count infected	count uninfected	minimum
1-Methylnicotinamide	55899	55899	55899	55899	55899	55899	55899	55899	55899	55899	1	0	#DIV/0!	0	0	0	0	4	4	4
2,3-Diphosphoglyceric acid	10000	10000	10000	10000	10000	10000	10000	10000	10000	10000	1	0	#DIV/0!	0	0	0	0	4	4	4
3-Hydroxybutyric acid	21349.5	21349.5	21349.5	21349.5	21349.5	27364	21349.5	21349.5	21349.5	22853.1	1.07043	0.0981892	0.355918	3007.25	0	0.140858	0.0949224	4	4	4
3-Phosphoglyceric acid	10000	10000	10000	10000	10000	10000	10000	10000	10000	10000	1	0	#DIV/0!	0	0	0	0	4	4	4
4-Hydroxyproline	24357.5	24357.5	24357.5	24357.5	24357.5	24357.5	24357.5	24357.5	24357.5	24357.5	1	0	#DIV/0!	0	0	0	0	4	4	4
4,5-Dihydroorotic acid	22845.5	22845.5	22845.5	22845.5	22845.5	22845.5	22845.5	22845.5	22845.5	22845.5	1	0	#DIV/0!	0	0	0	0	4	4	4
5-Phosphoribosylamine	10000	10000	10000	10000	10000	10000	10000	10000	10000	10000	1	0	#DIV/0!	0	0	0	0	4	4	4
5'-Methylthioadenosine	10000	10000	10000	10000	10000	10000	10000	10000	10000	10000	1	0	#DIV/0!	0	0	0	0	4	4	4
6-Phosphogluconic acid	10000	10000	10000	10000	10000	10000	10000	10000	10000	10000	1	0	#DIV/0!	0	0	0	0	4	4	4
Acetoacetic acid	10000	10000	10000	10000	10000	10000	10000	10000	10000	10000	1	0	#DIV/0!	0	0	0	0	4	4	4
Acetyl-CoA	11649	11649	11649	11649	11649	11649	11649	11649	11649	11649	1	0	#DIV/0!	0	0	0	0	4	4	4
														#DIV/0!	#DIV/0!	#DIV/0!	#DIV/0!
Acetylcysteine	10000	10000	10000	10000	10000	10000	10000	10000	10000	10000	1	0	#DIV/0!	0	0	0	0	4	4	4
Adenine	17505740	16796268	12360629	16157470	17054064	14852585	22986600	13364303	1.5705e+07	17064388	1.08656	0.119762	0.592595	4.22908e+06	2.2966e+06	0.312664	0.207573	4	4	4
Adenosine	7402780	6182353	5817523	5955524	7421166	6291010	9504186	5316128	6339545	7.13312e+06	1.12518	0.170154	0.444554	1.79959e+06	724605	0.311641	0.199792	4	4	4
Adenosine diphosphate ribose	12168	12168	12168	12168	12168	12168	12168	12168	12168	12168	1	0	#DIV/0!	0	0	0	0	4	4	4
Adenosine monophosphate	1599396	1651416	2234647	1878979	2252183	1858237	2259288	2390874	1.84111e+06	2.19015e+06	1.18958	0.250451	0.107838	230278	289088	0.224795	0.136313	4	4	4
Adenosine triphosphate	11835.5	11835.5	11835.5	11835.5	11835.5	11835.5	20094	11835.5	11835.5	13900.1	1.17444	0.231977	0.355918	4129.25	0	0.348887	0.214288	4	4	4
Adenylsuccinic acid	10000	10000	10000	10000	10000	10000	10000	10000	10000	10000	1	0	#DIV/0!	0	0	0	0	4	4	4
ADP	24153.5	24153.5	24153.5	24153.5	24153.5	24153.5	24153.5	24153.5	24153.5	24153.5	1	0	#DIV/0!	0	0	0	0	4	4	4
														#DIV/0!	#DIV/0!	#DIV/0!	#DIV/0!
Allantoin	11550	11550	12874	11550	11550	11550	11550	11550	11881	11550	0.97214	-0.0407634	0.355918	0	662	0.0541669	0.0401929	4	4	4
Aminoadipic acid	179454	179454	179454	179454	179454	179454	179454	179454	179454	179454	1	0	#DIV/0!	0	0	0	0	4	4	4
Argininosuccinic acid	11944	11944	11944	11944	11944	11944	11944	11944	11944	11944	1	0	#DIV/0!	0	0	0	0	4	4	4
Beta-Alanine	56135.5	56135.5	56135.5	56135.5	56135.5	56135.5	56135.5	56135.5	56135.5	56135.5	1	0	#DIV/0!	0	0	0	0	4	4	4
Betaine	808296	808296	808296	808296	808296	808296	808296	808296	808296	808296	1	0	#DIV/0!	0	0	0	0	4	4	4
Butyrylcarnitine	18288.5	18288.5	18288.5	18288.5	18288.5	18288.5	18288.5	18288.5	18288.5	18288.5	1	0	#DIV/0!	0	0	0	0	4	4	4
Carbamoyl phosphate	14663.5	14663.5	14663.5	14663.5	14663.5	14663.5	14663.5	14663.5	14663.5	14663.5	1	0	#DIV/0!	0	0	0	0	4	4	4
Carnosine	10697.5	10697.5	10697.5	10697.5	10697.5	10697.5	10697.5	10697.5	10697.5	10697.5	1	0	#DIV/0!	0	0	0	0	4	4	4
CDP	11059	11059	11059	11059	11059	11059	11059	11059	11059	11059	1	0	#DIV/0!	0	0	0	0	4	4	4
Choline	106437	106437	106437	106437	106437	117369	106437	106437	106437	109170	1.02568	0.0365767	0.355918	5466	0	0.0513543	0.0361169	4	4	4
cis-Aconitic acid	26635.5	26635.5	26635.5	26635.5	26635.5	26635.5	26635.5	26635.5	26635.5	26635.5	1	0	#DIV/0!	0	0	0	0	4	4	4
Citric acid	53999.5	53999.5	53999.5	53999.5	53999.5	53999.5	53999.5	53999.5	53999.5	53999.5	1	0	#DIV/0!	0	0	0	0	4	4	4
Citrulline	17146	17146	17146	17146	17146	17146	17146	17146	17146	17146	1	0	#DIV/0!	0	0	0	0	4	4	4
Creatine	4410886	2496498	2721972	3534299	3105883	3126839	2061015	2900376	3.29091e+06	2.79853e+06	0.85038	-0.23382	0.364611	502180	869553	0.271612	0.230399	4	4	4
Creatinine	143278	143278	143278	143278	143278	143278	143278	143278	143278	143278	1	0	#DIV/0!	0	0	0	0	4	4	4
Cyclic AMP	20482	20508	18520	12870	20401	19651	15239	17701	18095	18248	1.00846	0.0121472	0.945329	2306.3	3605.62	0.237958	0.170211	4	4	4
Cytidine	16229.5	16229.5	16229.5	16229.5	16229.5	16229.5	16229.5	16229.5	16229.5	16229.5	1	0	#DIV/0!	0	0	0	0	4	4	4
Cytidine monophosphate	13345.5	13345.5	13345.5	13345.5	13345.5	13345.5	13345.5	13345.5	13345.5	13345.5	1	0	#DIV/0!	0	0	0	0	4	4	4
Cytidine triphosphate	10000	10000	10000	10000	10000	10000	10000	10000	10000	10000	1	0	#DIV/0!	0	0	0	0	4	4	4
Cytosine	59746.5	59746.5	59746.5	59746.5	59746.5	59746.5	59746.5	59746.5	59746.5	59746.5	1	0	#DIV/0!	0	0	0	0	4	4	4
D-2-Hydroxyglutaric acid	247686	247686	247686	247686	247686	247686	247686	247686	247686	247686	1	0	#DIV/0!	0	0	0	0	4	4	4
D-Glucose	120203	120203	120203	120203	120203	120203	120203	120203	120203	120203	1	0	#DIV/0!	0	0	0	0	4	4	4
D-Glyceraldehyde 3-phosphate	10000	10000	10000	10000	10000	10000	10000	10000	10000	10000	1	0	#DIV/0!	0	0	0	0	4	4	4
D-Ribose 5-phosphate	10000	10000	10000	10000	10000	10000	10000	10000	10000	10000	1	0	#DIV/0!	0	0	0	0	4	4	4
D-Sedoheptulose 7-phosphate	10000	10000	10000	10000	10000	10000	10000	10000	10000	10000	1	0	#DIV/0!	0	0	0	0	4	4	4
Dihydrofolic acid	11608.5	11608.5	11608.5	11608.5	11608.5	11608.5	11608.5	11608.5	11608.5	11608.5	1	0	#DIV/0!	0	0	0	0	4	4	4
Dihydroxyacetone phosphate	10000	10000	10000	10000	10000	10000	10000	10000	10000	10000	1	0	#DIV/0!	0	0	0	0	4	4	4
dTDP	10000	10000	10000	10000	10000	10000	10000	10000	10000	10000	1	0	#DIV/0!	0	0	0	0	4	4	4
														#DIV/0!	#DIV/0!	#DIV/0!	#DIV/0!
FAD	11249.5	11249.5	11249.5	11249.5	11249.5	11249.5	11249.5	11249.5	11249.5	11249.5	1	0	#DIV/0!	0	0	0	0	4	4	4
Folic acid	10000	10000	10000	10000	10000	10000	10000	10000	10000	10000	1	0	#DIV/0!	0	0	0	0	4	4	4
Fructose 1,6-bisphosphate	10000	10000	10000	10000	10000	10000	10000	10000	10000	10000	1	0	#DIV/0!	0	0	0	0	4	4	4
Fructose 6-phosphate	10000	10000	10000	10000	10000	10000	10000	10000	10000	10000	1	0	#DIV/0!	0	0	0	0	4	4	4
Fumaric acid	21034	21034	21034	21034	21034	21034	21034	21034	21034	21034	1	0	#DIV/0!	0	0	0	0	4	4	4
GABA	1822161	1822161	1822161	1822161	2509694	3016474	2175105	2125144	1822161	2.4566e+06	1.34818	0.431015	0.0213459	410439	0	0.225248	0.12052	4	4	4
GABA-13C	6092504	5651793	6757258	6017118	7222630	6372392	5255004	5829309	6.12967e+06	6.16983e+06	1.00655	0.00942262	0.93573	837114	460537	0.156108	0.111875	4	4	4
Glucose 6-phosphate	10000	10000	10000	10000	10000	10000	10000	10000	10000	10000	1	0	#DIV/0!	0	0	0	0	4	4	4
Glutathione	10886.5	10886.5	10886.5	10886.5	10886.5	10886.5	10886.5	10886.5	10886.5	10886.5	1	0	#DIV/0!	0	0	0	0	4	4	4
Glycerol 3-phosphate	10000	10000	10000	10000	10000	10000	10000	10000	10000	10000	1	0	#DIV/0!	0	0	0	0	4	4	4
Glycine	20359.5	20359.5	20359.5	20359.5	20359.5	20359.5	20359.5	20359.5	20359.5	20359.5	1	0	#DIV/0!	0	0	0	0	4	4	4
Guanidoacetic acid	19747.5	19747.5	19747.5	19747.5	19747.5	19747.5	19747.5	19747.5	19747.5	19747.5	1	0	#DIV/0!	0	0	0	0	4	4	4
Guanine	15400.5	15400.5	15400.5	15400.5	15400.5	15400.5	15400.5	15400.5	15400.5	15400.5	1	0	#DIV/0!	0	0	0	0	4	4	4
Guanosine	13164.5	13164.5	13164.5	13164.5	13164.5	13164.5	13164.5	13164.5	13164.5	13164.5	1	0	#DIV/0!	0	0	0	0	4	4	4
Guanosine diphosphate	10000	10000	10000	10000	10000	10000	10000	10000	10000	10000	1	0	#DIV/0!	0	0	0	0	4	4	4
Guanosine monophosphate	15144.5	15144.5	15144.5	15144.5	15144.5	15144.5	15144.5	15144.5	15144.5	15144.5	1	0	#DIV/0!	0	0	0	0	4	4	4
Guanosine triphosphate	10000	10000	10000	10000	10000	10000	10000	10000	10000	10000	1	0	#DIV/0!	0	0	0	0	4	4	4
Homocysteine	10000	10000	10000	10000	10000	10000	10000	10000	10000	10000	1	0	#DIV/0!	0	0	0	0	4	4	4
Hypotaurine	10000	10000	10000	10000	10000	10000	10000	10000	10000	10000	1	0	#DIV/0!	0	0	0	0	4	4	4
Hypoxanthine	186197	168771	108271	102583	164460	125109	290149	115908	141456	173906	1.22941	0.297964	0.501371	80304.8	42269.9	0.676203	0.396758	4	4	4
Inosine	19376	19155	19571	16328	18633	16741	22697	15318	18607.5	18347.2	0.986014	-0.0203204	0.888184	3202	1529.14	0.190204	0.139149	4	4	4
Inosinic acid	12256	12256	12256	12256	12256	12256	12256	12256	12256	12256	1	0	#DIV/0!	0	0	0	0	4	4	4
L-Acetylcarnitine	25620.5	25620.5	25620.5	25620.5	25620.5	25620.5	25620.5	25620.5	25620.5	25620.5	1	0	#DIV/0!	0	0	0	0	4	4	4
L-Alanine	88029.5	88029.5	88029.5	88029.5	88029.5	88029.5	88029.5	88029.5	88029.5	88029.5	1	0	#DIV/0!	0	0	0	0	4	4	4
L-Arginine	15325.5	15325.5	15325.5	15325.5	15325.5	15325.5	15325.5	15325.5	15325.5	15325.5	1	0	#DIV/0!	0	0	0	0	4	4	4
L-Asparagine	18772	18772	18772	18772	18772	18772	18772	18772	18772	18772	1	0	#DIV/0!	0	0	0	0	4	4	4
L-Aspartic acid	112275	112275	112275	112275	112275	112275	112275	112275	112275	112275	1	0	#DIV/0!	0	0	0	0	4	4	4
L-Carnitine	69781	69781	69781	69781	69781	69781	69781	69781	69781	69781	1	0	#DIV/0!	0	0	0	0	4	4	4
L-Cystathionine	10000	10000	10000	10000	10000	10000	10000	10000	10000	10000	1	0	#DIV/0!	0	0	0	0	4	4	4
L-Cysteine	10000	10000	10000	10000	10000	10000	10000	10000	10000	10000	1	0	#DIV/0!	0	0	0	0	4	4	4
L-Cystine	10000	10000	10000	10000	10000	10000	10000	10000	10000	10000	1	0	#DIV/0!	0	0	0	0	4	4	4
L-Glutamic acid	94197	152880	98908	116465	103318	104215	65665	109624	115612	95705.5	0.827813	-0.272624	0.278711	20219.8	26628.7	0.258731	0.225455	4	4	4
L-Glutamine	73567	49346	68458	64743	53908	53292	38854	55373	64028.5	50356.8	0.786474	-0.346529	0.079737	7718.01	10435.4	0.175954	0.161384	4	4	4
L-Histidine	83836	83836	83836	83836	83836	83836	83836	83836	83836	83836	1	0	#DIV/0!	0	0	0	0	4	4	4
L-Isoleucine	247593	247593	247593	247593	247593	247593	247593	247593	247593	247593	1	0	#DIV/0!	0	0	0	0	4	4	4
L-Kynurenine	10818.5	10818.5	10818.5	10818.5	10818.5	10818.5	10818.5	10818.5	10818.5	10818.5	1	0	#DIV/0!	0	0	0	0	4	4	4
L-Lactic acid	7508766	7508766	7508766	7508766	7508766	7508766	7508766	7508766	7508766	7508766	1	0	#DIV/0!	0	0	0	0	4	4	4
L-Leucine	196612	196612	196612	196612	196612	196612	196612	196612	196612	196612	1	0	#DIV/0!	0	0	0	0	4	4	4
L-Lysine	33643.5	33643.5	33643.5	33643.5	33643.5	33643.5	33643.5	33643.5	33643.5	33643.5	1	0	#DIV/0!	0	0	0	0	4	4	4
L-Malic acid	170990	170990	170990	170990	170990	235275	170990	170990	170990	187061	1.09399	0.129599	0.355918	32142.5	0	0.187979	0.123948	4	4	4
L-Methionine	10000	10000	10000	10000	10000	10000	10000	10000	10000	10000	1	0	#DIV/0!	0	0	0	0	4	4	4
L-Phenylalanine	64762	64762	64762	64762	64762	64762	64762	64762	64762	64762	1	0	#DIV/0!	0	0	0	0	4	4	4
L-Proline	672830	672830	672830	672830	672830	672830	672830	672830	672830	672830	1	0	#DIV/0!	0	0	0	0	4	4	4
L-Serine	16046.5	16046.5	16046.5	16046.5	16046.5	16046.5	16046.5	16046.5	16046.5	16046.5	1	0	#DIV/0!	0	0	0	0	4	4	4
L-Threonine	21648	21648	21648	21648	21648	21648	21648	21648	21648	21648	1	0	#DIV/0!	0	0	0	0	4	4	4
L-Tryptophan	10921.5	10921.5	10921.5	10921.5	10921.5	10921.5	10921.5	10921.5	10921.5	10921.5	1	0	#DIV/0!	0	0	0	0	4	4	4
L-Tyrosine	18794.5	18794.5	18794.5	18794.5	18794.5	18794.5	18794.5	18794.5	18794.5	18794.5	1	0	#DIV/0!	0	0	0	0	4	4	4
L-Valine	456446	456446	456446	456446		456446	456446	456446	456446	456446	1	0	#DIV/0!	0	0	0	0	3	4	3
N-Acetyl-L-alanine	29548.5	29548.5	29548.5	29548.5	29548.5	29548.5	29548.5	29548.5	29548.5	29548.5	1	0	#DIV/0!	0	0	0	0	4	4	4
N-Acetyl-L-methionine	10000	10000	10000	10000	10000	10000	10000	10000	10000	10000	1	0	#DIV/0!	0	0	0	0	4	4	4
N-Acetyl-L-phenylalanine	65991	65991	65991	65991	65991	65991	65991	65991	65991	65991	1	0	#DIV/0!	0	0	0	0	4	4	4
N-Acetylglutamic acid	10000	10000	10000	10000	10000	10000	10000	10000	10000	10000	1	0	#DIV/0!	0	0	0	0	4	4	4
N-Acetylglutamine	60813	60813	60813	60813	60813	60813	60813	60813	60813	60813	1	0	#DIV/0!	0	0	0	0	4	4	4
N-Acetylornithine	17586.5	17586.5	17586.5	17586.5	17586.5	17586.5	17586.5	17586.5	17586.5	17586.5	1	0	#DIV/0!	0	0	0	0	4	4	4
N-Acetylserine	49992	49992	49992	49992	49992	49992	49992	49992	49992	49992	1	0	#DIV/0!	0	0	0	0	4	4	4
N6-Acetyl-L-lysine	209512	209512	209512	209512	209512	209512	209512	209512	209512	209512	1	0	#DIV/0!	0	0	0	0	4	4	4
NAD	11992	11992	11992	11992	11992	11992	11992	11992	11992	11992	1	0	#DIV/0!	0	0	0	0	4	4	4
NADH	11957.5	11957.5	11957.5	11957.5	11957.5	11957.5	11957.5	11957.5	11957.5	11957.5	1	0	#DIV/0!	0	0	0	0	4	4	4
NADP	10000	10000	10000	10000	10000	10000	10000	10000	10000	10000	1	0	#DIV/0!	0	0	0	0	4	4	4
NADPH	10000	10000	10000	10000	10000	10000	10000	10000	10000	10000	1	0	#DIV/0!	0	0	0	0	4	4	4
Niacinamide	776351	776351	776351	776351	776351	776351	776351	776351	776351	776351	1	0	#DIV/0!	0	0	0	0	4	4	4
Nicotinic acid	63715	63715	63715	63715	63715	63715	63715	63715	63715	63715	1	0	#DIV/0!	0	0	0	0	4	4	4
O-Phosphoethanolamine	13946	13946	13946	13946	13946	13946	13946	13946	13946	13946	1	0	#DIV/0!	0	0	0	0	4	4	4
Ornithine	27092	27092	27092	27092	27092	27092	27092	27092	27092	27092	1	0	#DIV/0!	0	0	0	0	4	4	4
Orotic acid	18901.5	18901.5	18901.5	18901.5	18901.5	18901.5	18901.5	18901.5	18901.5	18901.5	1	0	#DIV/0!	0	0	0	0	4	4	4
Orotidylic acid	10000	10000	10000	10000	10000	10000	10000	10000	10000	10000	1	0	#DIV/0!	0	0	0	0	4	4	4
Oxidized glutathione	37381	37381	37381	37381	37381	37381	37381	37381	37381	37381	1	0	#DIV/0!	0	0	0	0	4	4	4
Oxoadipic acid	78972.5	78972.5	78972.5	78972.5	78972.5	78972.5	78972.5	78972.5	78972.5	78972.5	1	0	#DIV/0!	0	0	0	0	4	4	4
Oxoglutaric acid	41851	41851	41851	41851	41851	41851	41851	41851	41851	41851	1	0	#DIV/0!	0	0	0	0	4	4	4
Palmitic acid	4571034	4571034	5326054	4571034	4571034	4571034	4571034	4571034	4759789	4571034	0.960344	-0.0583771	0.355918	0	377510	0.0761671	0.0572118	4	4	4
Pantothenic acid	17710	17710	17710	17710	17710	17710	17710	17710	17710	17710	1	0	#DIV/0!	0	0	0	0	4	4	4
Phenol	21208	21208	21208	21208	21208	21208	21208	21208	21208	21208	1	0	#DIV/0!	0	0	0	0	4	4	4
Phosphocreatine	10000	10000	10000	10000	10000	10000	10000	10000	10000	10000	1	0	#DIV/0!	0	0	0	0	4	4	4
Phosphoenolpyruvic acid	11460	11460	11460	11460	11460	11460	11460	11460	11460	11460	1	0	#DIV/0!	0	0	0	0	4	4	4
Phosphoribosyl pyrophosphate	10000	10000	10000	10000	10000	10000	10000	10000	10000	10000	1	0	#DIV/0!	0	0	0	0	4	4	4
Phosphorylcholine	11151	11151	11151	11151	11151	11151	11151	11151	11151	11151	1	0	#DIV/0!	0	0	0	0	4	4	4
Phosphoserine	10000	10000	10000	10000	10000	10000	10000	10000	10000	10000	1	0	#DIV/0!	0	0	0	0	4	4	4
Pipecolic acid	164160	164160	164160	164160	164160	164160	164160	164160	164160	164160	1	0	#DIV/0!	0	0	0	0	4	4	4
Propionylcarnitine	31380.5	31380.5	31380.5	31380.5	31380.5	31380.5	31380.5	31380.5	31380.5	31380.5	1	0	#DIV/0!	0	0	0	0	4	4	4
Pyruvic acid	294958	294958	294958	294958	294958	294958	294958	294958	294958	294958	1	0	#DIV/0!	0	0	0	0	4	4	4
Ribose 1-phosphate	10000	10000	10000	10000	10000	10000	10000	10000	10000	10000	1	0	#DIV/0!	0	0	0	0	4	4	4
S-Adenosylhomocysteine	10000	10000	10000	10000	10000	10313	10000	10000	10000	10078.2	1.00782	0.0112451	0.355918	156.5	0	0.01565	0.0112014	4	4	4
S-Adenosylmethionine	10000	10000	10000	10000	10000	10000	10000	10000	10000	10000	1	0	#DIV/0!	0	0	0	0	4	4	4
Saccharopine	17148	17148	17148	17148	17148	17148	17148	17148	17148	17148	1	0	#DIV/0!	0	0	0	0	4	4	4
Sarcosine	78932.5	78932.5	78932.5	78932.5	78932.5	78932.5	78932.5	78932.5	78932.5	78932.5	1	0	#DIV/0!	0	0	0	#DIV/0!
														#DIV/0!	#DIV/0!	#DIV/0!	#DIV/0!	0	0	0
Succinic acid	295278	295278	295278	295278	331227	459311	295278	295278	295278	345274	1.16932	0.225664	0.246581	77890.6	0	0.263787	0.162729	4	4	4
Taurine	45405	29508	27984	60766	42397	45519	21703	34464	40915.8	36020.8	0.880364	-0.183828	0.619498	10619.1	15400.8	0.42091	0.344883	4	4	4
Thymidine	10000	10000	10000	10000	10000	10000	10000	10000	10000	10000	1	0	#DIV/0!	0	0	0	0	4	4	4
Uracil	15465.5	15465.5	15465.5	15465.5	15465.5	15465.5	15465.5	15465.5	15465.5	15465.5	1	0	#DIV/0!	0	0	0	0	4	4	4
Ureidopropionic acid	20760.5	20760.5	20760.5	20760.5	20760.5	20760.5	20760.5	20760.5	20760.5	20760.5	1	0	#DIV/0!	0	0	0	0	4	4	4
Ureidosuccinic acid	10000	10000	10000	10000	10000	10000	10000	10000	10000	10000	1	0	#DIV/0!	0	0	0	0	4	4	4
Uric acid	10000	10000	10000	10000	10000	10000	10000	10000	10000	10000	1	0	#DIV/0!	0	0	0	0	4	4	4
Uridine	30268.5	30268.5	30268.5	30268.5	30268.5	42805	30268.5	30268.5	30268.5	33402.6	1.10354	0.142144	0.355918	6268.25	0	0.207088	0.135366	4	4	4
Uridine 5'-diphosphate	10000	10000	10000	10000	10000	10000	10000	10000	10000	10000	1	0	#DIV/0!	0	0	0	0	4	4	4
Uridine 5'-monophosphate	11821	11821	11821	11821	11821	11821	11821	11821	11821	11821	1	0	#DIV/0!	0	0	0	0	4	4	4
Uridine diphosphate glucose	11511	11511	11511	11511	11511	11511	11511	11511	11511	11511	1	0	#DIV/0!	0	0	0	0	4	4	4
Uridine diphosphate-N-acetylglucosamine	10000	10000	10000	10000	10000	10000	10000	10000	10000	10000	1	0	#DIV/0!	0	0	0	0	4	4	4
Uridine triphosphate	10000	10000	10000	10000	10000	10000	10000	10000	10000	10000	1	0	#DIV/0!	0	0	0	0	4	4	4
Valerylcarnitine	18656.5	18656.5	18656.5	18656.5	18656.5	18656.5	18656.5	18656.5	18656.5	18656.5	1	0	#DIV/0!	0	0	0	0	4	4	4
Xanthine	28746.5	28746.5	28746.5	28746.5	28746.5	28746.5	28746.5	28746.5	28746.5	28746.5	1	0	#DIV/0!	0	0	0	0	4	4	4
Xanthosine	12417.5	12417.5	12417.5	12417.5	12417.5	12417.5	12417.5	12417.5	12417.5	12417.5	1	0	#DIV/0!	0	0	0	0	4	4	4
Xanthylic acid	10000	10000	10000	10000	10000	10000	10000	10000	10000	10000	1	0	#DIV/0!	0	0	0	0	4	4	4
														#DIV/0!		#DIV/0!	#DIV/0!	0	0	0
														#DIV/0!		#DIV/0!	#DIV/0!	0	0	0
														#DIV/0!		#DIV/0!	#DIV/0!	0	0	0
0	0	0	0	0	0	0	0	0.0910005	0.114134	-0.117462	0	-0.0407634	0	0		#DIV/0!	#DIV/0!	4	4	4	0	0	0.254919	0	0.0992194	0	0	0	0	0	0	0	0	0	0	0	0	0	0	0	0	0	1.85159	0.103584	0	0	0	0	0
0	0	0.0981892	0	0	0	0	0	0.119762	0.170154	0.250451	0	-0.0407634	0	0		#DIV/0!	#DIV/0!	4	4	4	0	0	-0.23382	0	0.0121472	0	0	0	0	0	0	0	0	0	0	0	0	0	0	0	0	0	0.431015	0.00942262	0	0	0	0	0
														#DIV/0!		#DIV/0!	#DIV/0!	0	0	0
														#DIV/0!		#DIV/0!	#DIV/0!	0	0	0
														#DIV/0!		#DIV/0!	#DIV/0!	0	0	0
														#DIV/0!		#DIV/0!	#DIV/0!	0	0	0
														#DIV/0!		#DIV/0!	#DIV/0!	0	0	0
														#DIV/0!		#DIV/0!	#DIV/0!	0	0	0
														#DIV/0!		#DIV/0!	#DIV/0!	0	0	0
														#DIV/0!		#DIV/0!	#DIV/0!	0	0	0
														#DIV/0!		#DIV/0!	#DIV/0!	0	0	0
														#DIV/0!		#DIV/0!	#DIV/0!	0	0	0
														#DIV/0!		#DIV/0!	#DIV/0!	0	0	0
														#DIV/0!		#DIV/0!	#DIV/0!	0	0	0
														#DIV/0!		#DIV/0!	#DIV/0!	0	0	0
														#DIV/0!		#DIV/0!	#DIV/0!	0	0	0
														#DIV/0!		#DIV/0!	#DIV/0!	0	0	0
														#DIV/0!		#DIV/0!	#DIV/0!	0	0	0
														#DIV/0!		#DIV/0!	#DIV/0!	0	0	0
														#DIV/0!		#DIV/0!	#DIV/0!	0	0	0
														#DIV/0!		#DIV/0!	#DIV/0!	0	0	0
														#DIV/0!		#DIV/0!	#DIV/0!	0	0	0
														#DIV/0!		#DIV/0!	#DIV/0!	0	0	0
														#DIV/0!		#DIV/0!	#DIV/0!	0	0	0
														#DIV/0!		#DIV/0!	#DIV/0!	0	0	0
														#DIV/0!		#DIV/0!	#DIV/0!	0	0	0
														#DIV/0!		#DIV/0!	#DIV/0!	0	0	0
														#DIV/0!		#DIV/0!	#DIV/0!	0	0	0
														#DIV/0!		#DIV/0!	#DIV/0!	0	0	0
														#DIV/0!		#DIV/0!	#DIV/0!	0	0	0
														#DIV/0!		#DIV/0!	#DIV/0!	0	0	0
														#DIV/0!		#DIV/0!	#DIV/0!	0	0	0
														#DIV/0!		#DIV/0!	#DIV/0!	0	0	0
														#DIV/0!		#DIV/0!	#DIV/0!	0	0	0
														#DIV/0!		#DIV/0!	#DIV/0!	0	0	0
														#DIV/0!		#DIV/0!	#DIV/0!	0	0	0
														#DIV/0!		#DIV/0!	#DIV/0!	0	0	0
														#DIV/0!		#DIV/0!	#DIV/0!	0	0	0
														#DIV/0!		#DIV/0!	#DIV/0!	0	0	0
														#DIV/0!		#DIV/0!	#DIV/0!	0	0	0
														#DIV/0!		#DIV/0!	#DIV/0!	0	0	0
														#DIV/0!		#DIV/0!	#DIV/0!	0	0	0
														#DIV/0!		#DIV/0!	#DIV/0!	0	0	0
														#DIV/0!		#DIV/0!	#DIV/0!	0	0	0
														#DIV/0!		#DIV/0!	#DIV/0!	0	0	0
														#DIV/0!		#DIV/0!	#DIV/0!	0	0	0
														#DIV/0!		#DIV/0!	#DIV/0!	0	0	0
														#DIV/0!		#DIV/0!	#DIV/0!	0	0	0
														#DIV/0!		#DIV/0!	#DIV/0!	0	0	0
														#DIV/0!		#DIV/0!	#DIV/0!	0	0	0
														#DIV/0!		#DIV/0!	#DIV/0!	0	0	0
														#DIV/0!		#DIV/0!	#DIV/0!	0	0	0
														#DIV/0!		#DIV/0!	#DIV/0!	0	0	0
														#DIV/0!		#DIV/0!	#DIV/0!	0	0	0
														#DIV/0!		#DIV/0!	#DIV/0!	0	0	0
														#DIV/0!		#DIV/0!	#DIV/0!	0	0	0
														#DIV/0!		#DIV/0!	#DIV/0!	0	0	0
														#DIV/0!		#DIV/0!	#DIV/0!	0	0	0
														#DIV/0!		#DIV/0!	#DIV/0!	0	0	0
														#DIV/0!		#DIV/0!	#DIV/0!	0	0	0
														#DIV/0!		#DIV/0!	#DIV/0!	0	0	0
														#DIV/0!		#DIV/0!	#DIV/0!	0	0	0
														#DIV/0!		#DIV/0!	#DIV/0!	0	0	0
														#DIV/0!		#DIV/0!	#DIV/0!	0	0	0
														#DIV/0!		#DIV/0!	#DIV/0!	0	0	0
														#DIV/0!		#DIV/0!	#DIV/0!	0	0	0
														#DIV/0!		#DIV/0!	#DIV/0!	0	0	0
														#DIV/0!		#DIV/0!	#DIV/0!	0	0	0
														#DIV/0!		#DIV/0!	#DIV/0!	0	0	0
														#DIV/0!		#DIV/0!	#DIV/0!	0	0	0
														#DIV/0!		#DIV/0!	#DIV/0!	0	0	0
														#DIV/0!		#DIV/0!	#DIV/0!	0	0	0
														#DIV/0!		#DIV/0!	#DIV/0!	0	0	0
														#DIV/0!		#DIV/0!	#DIV/0!	0	0	0
														#DIV/0!		#DIV/0!	#DIV/0!	0	0	0
														#DIV/0!		#DIV/0!	#DIV/0!	0	0	0
														#DIV/0!		#DIV/0!	#DIV/0!	0	0	0
														#DIV/0!		#DIV/0!	#DIV/0!	0	0	0
														#DIV/0!		#DIV/0!	#DIV/0!	0	0	0
														#DIV/0!		#DIV/0!	#DIV/0!	0	0	0
														#DIV/0!		#DIV/0!	#DIV/0!	0	0	0
														#DIV/0!		#DIV/0!	#DIV/0!	0	0	0
														#DIV/0!		#DIV/0!	#DIV/0!	0	0	0
														#DIV/0!		#DIV/0!	#DIV/0!	0	0	0
														#DIV/0!		#DIV/0!	#DIV/0!	0	0	0
														#DIV/0!		#DIV/0!	#DIV/0!	0	0	0
														#DIV/0!		#DIV/0!	#DIV/0!	0	0	0
														#DIV/0!		#DIV/0!	#DIV/0!	0	0	0
														#DIV/0!		#DIV/0!	#DIV/0!	0	0	0
														#DIV/0!		#DIV/0!	#DIV/0!	0	0	0
														#DIV/0!		#DIV/0!	#DIV/0!	0	0	0
														#DIV/0!		#DIV/0!	#DIV/0!	0	0	0
														#DIV/0!		#DIV/0!	#DIV/0!	0	0	0
														#DIV/0!		#DIV/0!	#DIV/0!	0	0	0
														#DIV/0!		#DIV/0!	#DIV/0!	0	0	0
														#DIV/0!		#DIV/0!	#DIV/0!	0	0	0
														#DIV/0!		#DIV/0!	#DIV/0!	0	0	0
														#DIV/0!		#DIV/0!	#DIV/0!	0	0	0
														#DIV/0!		#DIV/0!	#DIV/0!	0	0	0
														#DIV/0!		#DIV/0!	#DIV/0!	0	0	0
														#DIV/0!		#DIV/0!	#DIV/0!	0	0	0
														#DIV/0!		#DIV/0!	#DIV/0!	0	0	0
														#DIV/0!		#DIV/0!	#DIV/0!	0	0	0
														#DIV/0!		#DIV/0!	#DIV/0!	0	0	0
														#DIV/0!		#DIV/0!	#DIV/0!	0	0	0
														#DIV/0!		#DIV/0!	#DIV/0!	0	0	0
														#DIV/0!			#DIV/0!	0	0	0
														#DIV/0!			#DIV/0!	0	0	0
														#DIV/0!			#DIV/0!	0	0	0
														#DIV/0!			#DIV/0!	0	0	0
														#DIV/0!			#DIV/0!	0	0	0
														#DIV/0!			#DIV/0!	0	0	0
														#DIV/0!			#DIV/0!	0	0	0
														#DIV/0!			#DIV/0!	0	0	0
														#DIV/0!			#DIV/0!	0	0	0
														#DIV/0!			#DIV/0!	0	0	0
														#DIV/0!			#DIV/0!	0	0	0
														#DIV/0!			#DIV/0!	0	0	0
														#DIV/0!			#DIV/0!	0	0	0
														#DIV/0!			#DIV/0!	0	0	0
														#DIV/0!			#DIV/0!	0	0	0
														#DIV/0!			#DIV/0!	0	0	0
														#DIV/0!			#DIV/0!	0	0	0
														#DIV/0!			#DIV/0!	0	0	0
														#DIV/0!			#DIV/0!	0	0	0
														#DIV/0!			#DIV/0!	0	0	0
														#DIV/0!			#DIV/0!	0	0	0
														#DIV/0!			#DIV/0!	0	0	0
														#DIV/0!			#DIV/0!	0	0	0
														#DIV/0!			#DIV/0!	0	0	0
														#DIV/0!			#DIV/0!	0	0	0
														#DIV/0!			#DIV/0!	0	0	0
														#DIV/0!			#DIV/0!	0	0	0
														#DIV/0!			#DIV/0!	0	0	0
														#DIV/0!				0	0	0
														#DIV/0!				0	0	0
														#DIV/0!				0	0	0
														#DIV/0!				0	0	0
														#DIV/0!				0	0	0
														#DIV/0!				0	0	0
														#DIV/0!				0	0	0
														#DIV/0!				0	0	0
														#DIV/0!				0	0	0
														#DIV/0!				0	0	0
														#DIV/0!				0	0	0
														#DIV/0!				0	0	0
														#DIV/0!				0	0	0
																		0	0	0
																		0	0	0
																		0	0	0
																		0	0	0
																		0	0	0
																		0	0	0
																		0	0	0
																		0	0	0
																		0	0	0
																		0	0	0
																		0	0	0
																		0	0	0
																		0	0	0
																		0	0	0
																		0	0	0
																		0	0	0
																		0	0	0
																		0	0	0
																		0	0	0
																		0	0	0
																		0	0	0
																		0	0	0
																		0	0	0
																		0	0	0
																		0	0	0
																		0	0	0
																		0	0	0
																		0	0	0
																		0	0	0
																		0	0	0
																		0	0	0
[truncated: 91 more columns]
