# Supplementary figures and images for: Rapid purification and metabolomic profiling of synaptic vesicles from mammalian brain
Source: eLife journal article supplement (doi:10.7554/elife.59699), 2020-10-12

# Supplemental Figure 1

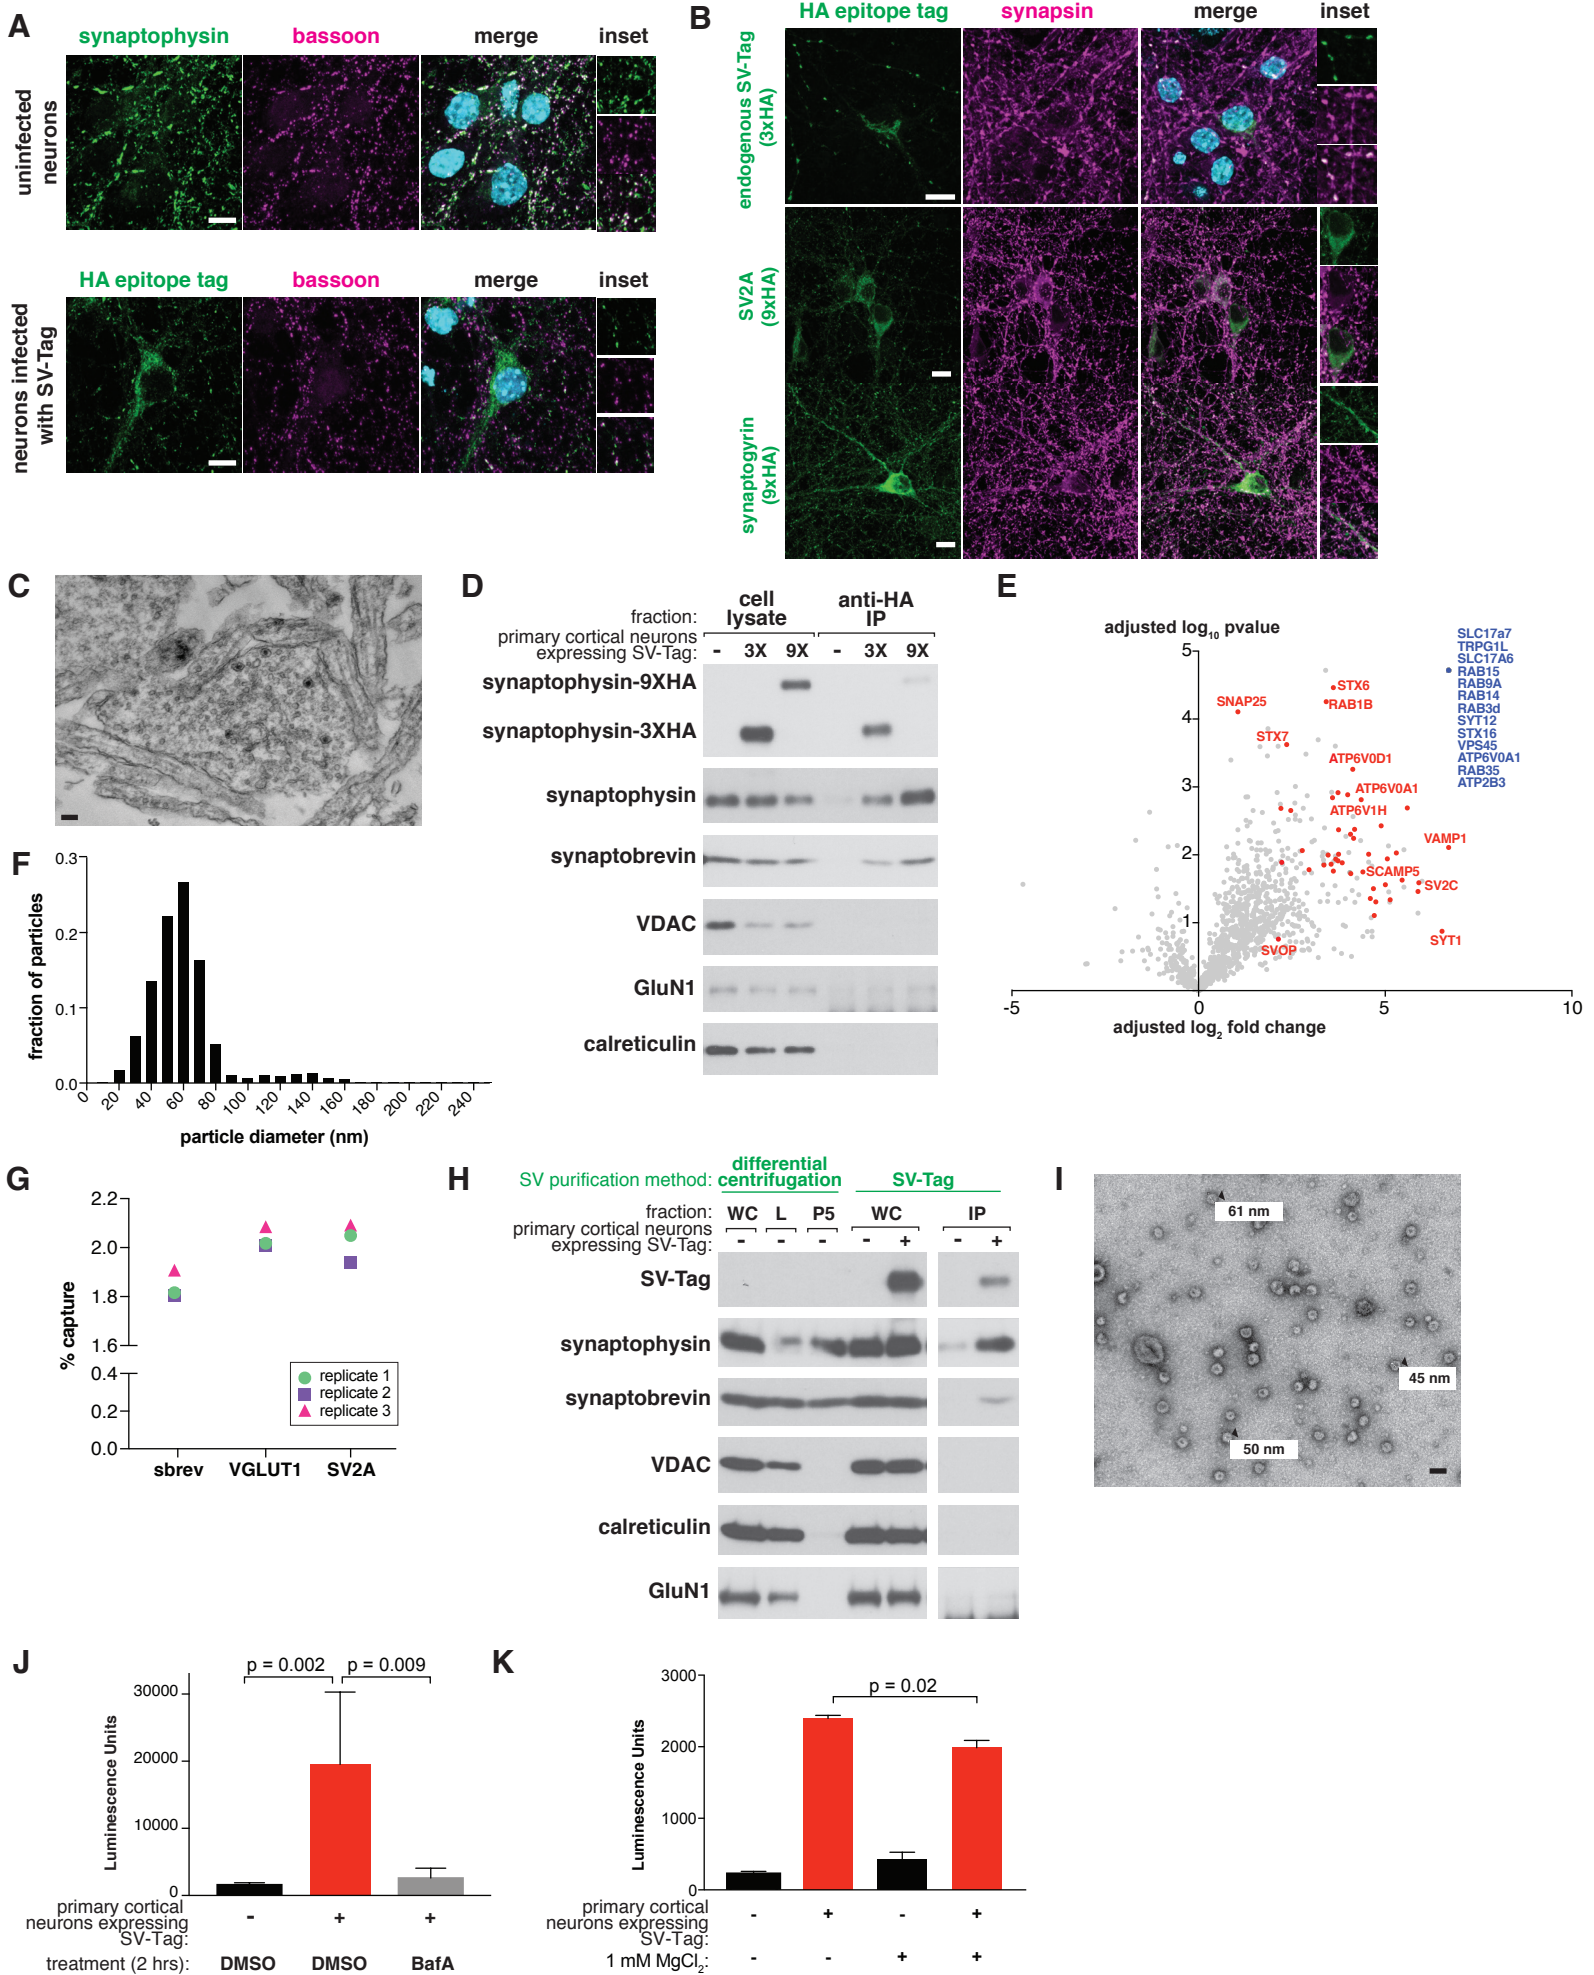

Supplement: supp [file elife_poa_e59699_Figure_1_figure_supplement_1.pdf › elife_poa_e59699_Figure_1_figure_supplement_1.pdf]

## Supplemental Figure 2

**A**

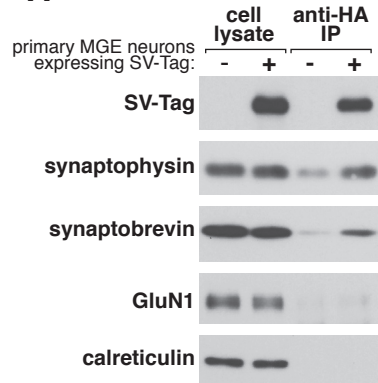

**B**

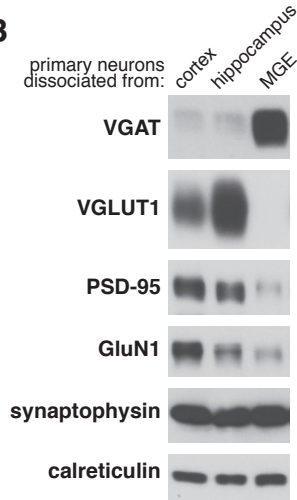

**C**

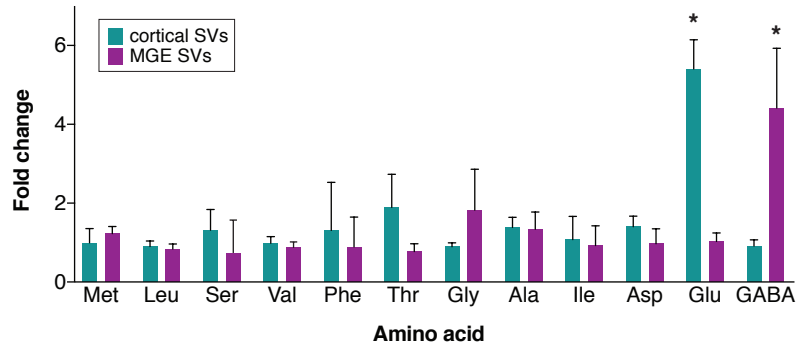

Supplement: supp [file elife_poa_e59699_Figure_2_figure_supplement_1.pdf › elife_poa_e59699_Figure_2_figure_supplement_1.pdf]

# Supplemental Figure 4

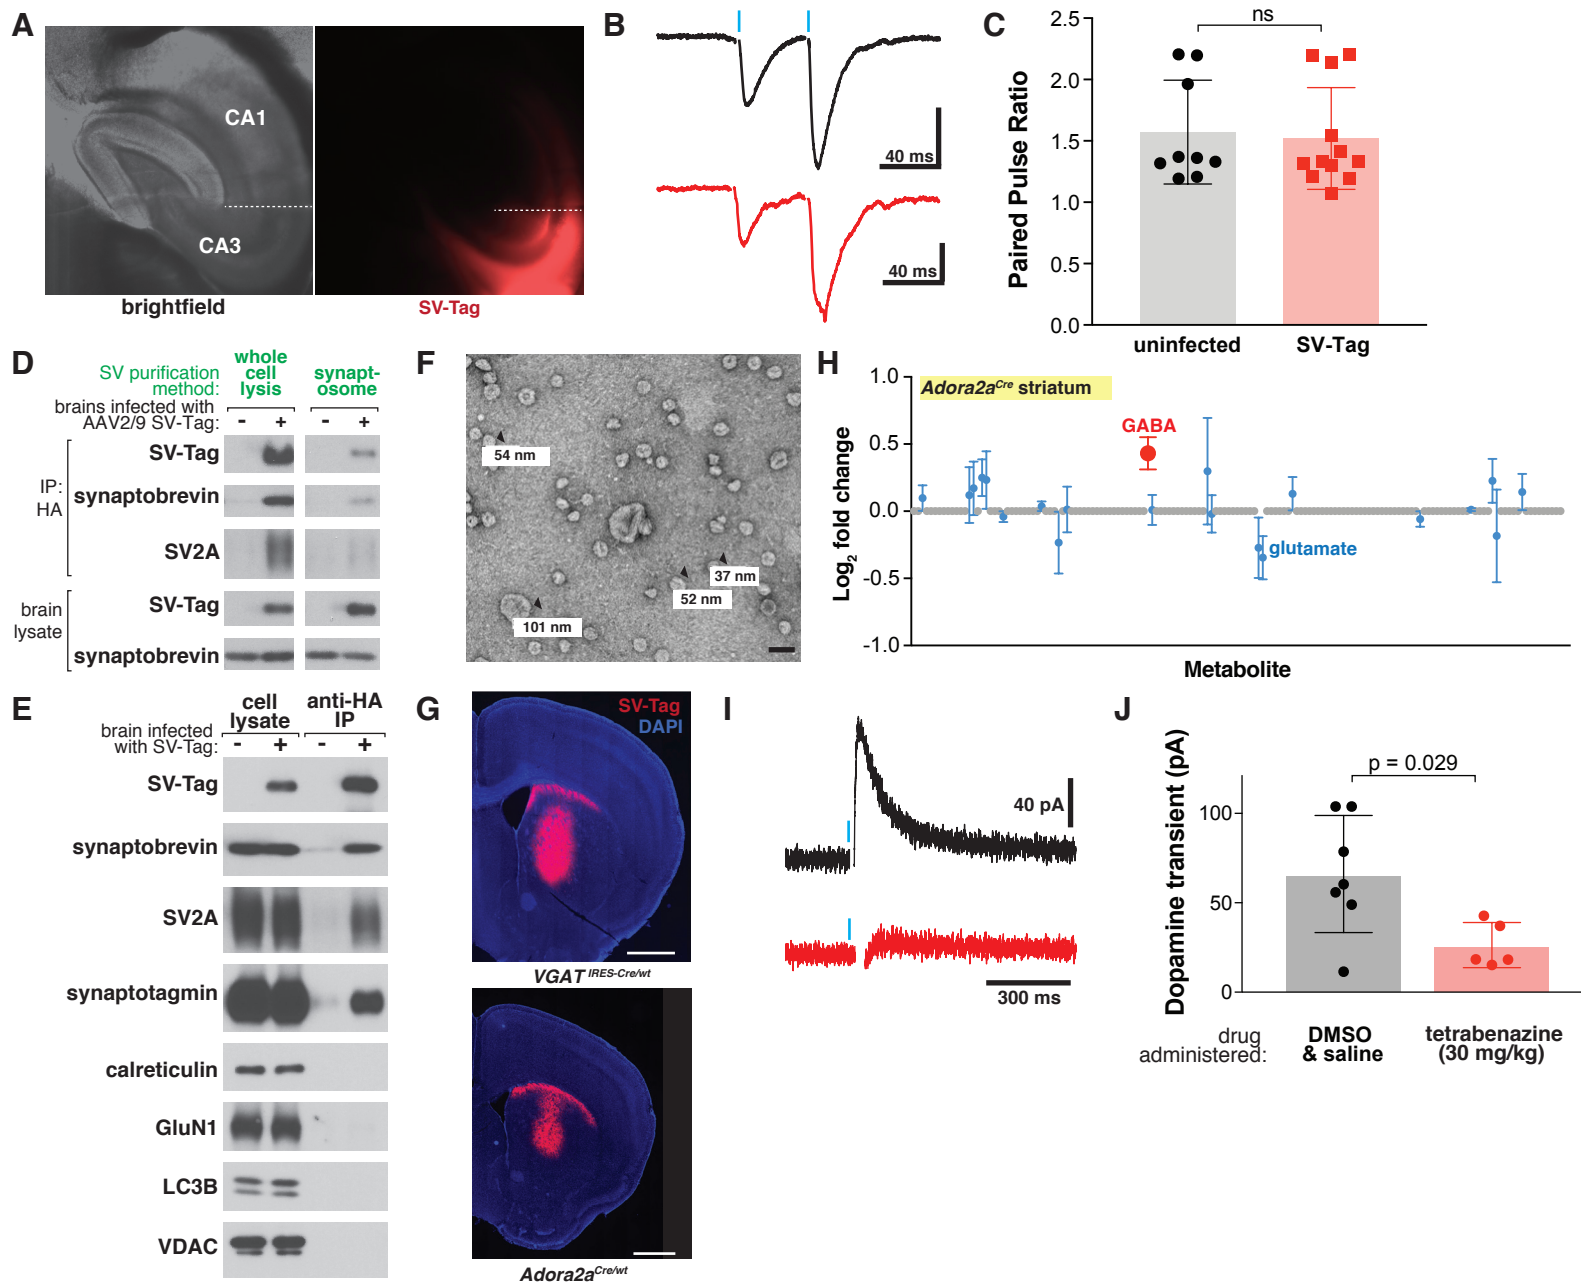

Supplement: supp [file elife_poa_e59699_Figure_4_figure_supplement_1.pdf › elife_poa_e59699_Figure_4_figure_supplement_1.pdf]
